# Supplementary material for: Olfactory channels associated with the Drosophila maxillary palp mediate short- and long-range attraction
Source: eLife. 2016 May 23;5:e14925. doi: 10.7554/eLife.14925 (PMC4927298; doi:10.7554/eLife.14925)
Supplement: Figure 1—source data 1. — DOI: http://dx.doi.org/10.7554/eLife.14925.003 [file elife-14925-fig1-data1.xlsx]

## Sheet: Fig1C
	Presence/absence of physiologically active compound in each fruit
	5-hexen-3-one	Ethyl butyrate	Unknown	Ethyl (methylthio) acetate	Gamma-hexalactone	Para-tolyl acetate	Creosol	4-ethylguaiacol	Unknown	Eugenol	Methyl eugenol	Unknown	Strawberry Furanone	(-)-camphore	Unknown	Unknown	Alpha-ionone	Beta-Ionone	Phenol	4-methylphenol	Butyl Butyrate	sec-4-butoxy-2-butanone	Unknown	Unknown	Unknown	Butyl 3-hydroxy butyrate	Phenethyl acetate	Phenethyl propionate
Apple	1	0	1	0	0	0	0	0	0	0	1	0	1	0	0	0	0	0	0	0	0	1	1	1	1	1	1	1
Apricot	1	0	0	0	0	0	0	0	0	0	0	0	1	0	0	0	0	0	0	0	0	0	1	1	1	0	0	0
Avocado	1	0	0	0	0	0	0	0	0	0	0	0	0	0	0	0	0	0	0	0	0	0	0	1	1	0	0	0
Banana	1	0	0	0	0	0	0	0	0	1	0	0	0	0	0	0	0	0	0	0	1	1	0	1	1	0	1	0
Blackberry	1	0	0	0	0	0	0	0	0	0	0	0	0	0	0	0	0	0	0	0	0	1	0	1	1	0	1	0
Blueberry	1	0	0	0	0	0	0	0	0	0	0	0	0	0	0	0	0	0	0	0	0	0	0	1	1	0	1	0
Cactus fig	1	0	0	0	0	0	0	0	0	0	0	0	0	0	0	0	0	0	0	0	0	0	1	1	1	0	1	0
Currant	1	0	0	0	0	0	0	0	0	0	0	0	1	1	0	0	0	0	0	0	0	1	0	1	1	0	1	0
Fig	1	0	0	0	0	0	0	0	0	0	0	0	0	0	0	0	0	0	0	0	0	0	0	1	1	0	1	0
Galia melon	1	1	0	1	0	0	1	1	1	1	1	0	1	1	0	0	0	0	0	0	0	0	0	1	1	0	1	0
Grapes	1	0	0	0	0	0	0	0	0	0	0	0	0	0	0	0	0	0	0	0	0	0	1	1	1	1	1	0
Grapefruit	1	0	0	0	0	0	0	0	0	1	0	0	1	1	0	0	0	0	0	0	0	0	0	1	1	0	1	0
Honey melon	1	1	0	0	0	0	0	0	0	0	0	0	1	0	0	0	0	0	0	0	0	0	0	1	1	0	1	0
Irvingia	1	0	0	0	0	0	0	1	0	0	0	0	1	1	0	0	0	0	0	0	0	1	0	1	1	0	1	0
Kiwi	1	0	0	0	0	0	0	0	0	0	0	0	1	1	0	0	0	0	0	0	0	0	0	1	1	0	1	0
Mandarina	1	0	0	0	0	0	0	0	0	1	0	0	0	1	0	0	0	0	0	0	0	0	0	1	1	0	0	0
Mango	1	0	0	0	0	0	0	0	0	0	0	0	1	1	0	0	0	0	0	0	0	0	0	1	1	0	0	0
Monodora	1	0	0	0	0	0	0	0	0	0	0	1	1	1	1	0	0	0	0	0	0	0	1	1	1	1	1	0
Myianthus	1	0	0	0	0	0	0	1	0	1	0	1	1	1	0	0	0	0	0	0	0	0	0	1	1	0	1	0
Napoleonaea	1	0	0	0	0	0	0	1	0	0	0	1	1	1	0	0	0	0	0	0	0	0	0	1	1	0	1	0
Orange	1	0	0	0	0	0	0	0	0	1	0	0	0	1	0	0	0	0	0	0	0	0	0	0	1	0	1	0
Papaya	1	0	0	0	0	0	0	0	0	0	0	0	0	0	0	0	0	0	0	0	0	0	0	0	1	0	1	0
Passionfruit	1	1	0	0	0	0	0	0	0	1	0	1	1	1	1	0	0	0	0	0	0	0	0	1	1	0	1	1
Peach	1	0	0	0	1	0	0	0	0	0	0	1	1	1	0	0	0	0	0	0	0	1	0	1	1	0	1	0
Pear	1	1	1	0	0	0	0	0	0	0	1	0	0	0	0	0	0	0	0	0	0	1	1	1	1	0	1	0
physalis	1	1	0	0	1	0	0	0	0	0	0	0	1	1	0	0	0	0	0	0	0	1	0	1	1	0	1	0
Pineapple	1	0	0	0	1	0	0	1	0	0	0	0	1	1	0	0	0	0	0	0	0	0	0	1	1	0	1	0
Plums	1	0	0	0	0	0	0	0	0	0	0	0	0	0	0	0	0	0	0	0	0	0	0	1	1	0	1	0
Pomegranate	1	0	0	0	0	0	0	0	0	0	0	0	0	0	0	0	0	0	0	0	0	0	0	1	1	0	1	0
Raspberry	1	0	0	0	0	0	0	0	0	0	0	0	1	1	0	1	1	1	0	0	0	0	0	1	1	0	1	0
Strawberry	1	0	0	0	0	0	0	0	0	0	0	0	1	1	0	0	0	0	0	0	0	0	0	1	1	0	1	0
Syzygium	1	0	0	0	0	0	0	1	0	0	0	0	1	1	0	0	0	0	0	0	0	1	0	1	1	0	0	0
Trecula	1	0	0	0	1	1	1	1	1	0	1	0	1	1	0	0	0	0	0	0	0	1	0	1	1	1	1	0
water melon	1	0	0	0	0	0	0	0	0	0	0	0	1	1	0	0	0	0	0	0	0	0	0	1	1	0	1	0
Dekkera bruxellensis	0	0	0	0	0	0	0	0	0	0	0	0	0	0	0	0	0	0	0	0	0	0	0	0	0	0	1	0
Hanseniaspora uvarum	0	0	0	0	0	0	0	0	0	0	0	0	0	0	0	0	0	0	0	0	0	0	0	0	0	0	1	0
Metschnikowia pulcherrima	0	0	0	0	0	0	0	0	0	0	0	0	0	0	0	0	0	0	0	0	0	0	0	0	0	0	1	0
Saccharomyces cerevisiae	0	0	0	0	0	0	0	0	0	0	0	0	0	0	0	0	0	0	0	0	0	0	0	0	0	0	1	0
Torulaspora delbrueckii	0	0	0	0	0	0	0	0	0	0	0	0	0	0	0	0	0	0	0	0	0	0	0	0	0	0	1	1
Wickerhamomyces anomalus	0	0	0	0	0	0	0	0	0	0	0	0	0	0	0	0	0	0	0	0	0	0	0	0	0	0	1	0
Streptomyces	1	0	0	0	0	0	0	0	0	0	0	0	0	0	0	0	0	0	0	0	0	0	0	0	0	0	0	0
Dall's sheep	1	0	0	0	0	0	0	1	0	0	0	0	1	1	0	0	0	0	0	0	0	0	0	1	1	0	1	0
Dear	1	0	0	0	0	0	0	0	0	0	0	0	1	1	0	0	0	0	1	0	0	0	0	1	1	0	0	0
Dog	0	0	0	0	0	0	0	1	0	0	0	0	1	1	0	0	0	0	1	1	0	0	0	1	1	0	1	1
Goat	0	0	0	0	0	0	0	0	0	0	0	0	1	1	0	0	0	0	1	1	0	0	0	0	0	0	0	0
Hyena	1	0	0	0	0	0	0	0	0	0	0	0	1	1	0	0	0	0	1	0	0	0	0	1	1	0	1	1
Lion	1	0	0	0	0	0	0	0	0	0	0	0	1	1	0	0	0	0	1	1	0	0	0	1	1	0	1	0
Pig	0	0	0	0	0	0	0	1	0	0	0	0	1	1	0	0	0	0	1	1	0	0	0	1	1	0	1	1
Pony	1	0	0	0	0	0	0	1	0	0	0	0	1	1	0	0	0	0	1	0	0	0	0	1	1	0	1	1
Rhinoceros	0	0	0	0	0	0	0	0	0	0	0	0	1	1	0	0	0	0	1	1	0	0	0	1	1	0	1	1
Sheep	0	0	0	0	0	0	0	0	0	0	0	0	1	1	0	0	0	0	0	0	0	0	0	0	1	0	0	0
Wild horse	0	0	0	0	0	0	0	0	0	0	0	0	1	1	0	0	0	0	0	0	0	0	0	1	1	0	1	1

## Sheet: Fig1D
	32 dragon descriptors of each physiologically active compounds
Headed descriptots	22	92	96	359	404	433	513	592	678	688	690	698	946	948	959	963	1012	1069	1110	1191	1286	1321	1331	1348	1430	1528	1558
5-hexen-3-one	0.82194	0.21959	1.78616	0.14372	0.78478	0.96255	-1.07151	1.29512	-0.64974	-0.88163	-0.88398	-1.00837	1.42108	0.18816	0.74373	-1.3101	1.16403	-0.14444	-0.66012	-0.66583	-0.74464	-0.88576	-0.92204	0.43239	-0.22361	-0.6662	-0.22361
Ethyl (methylthio) acetate	1.38425	2.44887	-0.19791	0.14372	0.78478	0.96255	-1.07151	-0.19423	0.40893	-0.88163	-0.88398	-0.32908	0.27398	-1.04631	1.10298	-1.56381	-1.2312	-0.18374	-0.89307	1.53613	1.53196	-0.97772	-0.8708	2.46331	-0.22361	-0.6662	-0.22361
ethyl butyrate	1.09711	0.74357	-0.55797	0.14372	0.78478	0.96255	-1.07151	-0.33242	0.04956	-0.88163	-0.88398	-0.35565	0.41618	-0.05077	1.04849	-1.25731	1.11054	-0.23286	-0.89307	-0.45612	-0.91064	-0.54631	-1.2954	-0.55031	-0.22361	-0.6662	-0.22361
Gamma-hexalactone	-0.75733	-1.29755	-1.54877	0.14372	0.78478	0.96255	-1.07151	-0.33242	-0.7207	-0.88163	-0.88398	-1.18385	-1.21441	-0.34943	-0.33402	-0.3191	0.93818	-0.18374	-0.7503	0.80215	3.09713	-0.27017	-0.57065	0.89099	-0.22361	-0.6662	-0.22361
4-ethylguaiacol	-0.38644	0.24817	0.23168	0.14372	-1.25607	-1.05591	0.16519	-0.33242	0.09419	1.07755	1.07458	-0.23204	-0.43704	0.81535	-0.50154	0.77748	-0.24457	-0.30164	-0.50233	0.80215	-0.43635	0.05443	0.37372	0.10482	-0.22361	1.75635	-0.22361
Eugenol	0.0682	0.00286	0.34343	0.14372	-0.96853	-0.82791	0.18024	-0.33242	0.49363	1.07755	1.07458	0.19768	-0.56976	0.5366	0.51365	1.5352	-1.5046	-0.07566	-0.05147	0.87205	0.06166	0.279	0.95206	0.56342	-0.22361	1.75635	-0.22361
Methyleugenol	0.34337	0.1791	0.02806	1.46815	-0.96853	-0.45589	0.91745	-0.33242	0.98347	1.07755	1.07458	0.91663	-1.57466	1.16379	0.42484	1.42622	-0.87459	-0.37042	0.19274	0.69729	-0.08063	0.45849	1.03991	0.4979	-0.22361	1.75635	-0.22361
Creosol	-0.82912	0.54589	0.07524	0.14372	0.78478	-1.43753	-0.71344	-0.33242	-0.73786	1.07755	1.07458	-0.6412	-1.04377	0.64611	-0.03734	0.1747	-0.39316	-0.23286	-0.89307	0.52253	-0.50749	-0.73935	-0.68046	0.43239	-0.22361	1.75635	-0.22361
Para-tolyl acetate	-0.29073	-0.16386	-0.99253	0.14372	-1.71544	-1.36552	-0.13571	-0.33242	-0.00996	1.07755	1.07458	0.00889	-1.15753	0.64611	0.93748	1.2866	-0.19108	-0.26234	0.94416	2.23517	1.50825	-0.19488	0.43229	-0.61583	-0.22361	0.54507	-0.22361
Alpha-ionone	-0.72144	-0.60448	1.42362	0.14372	0.30087	0.58574	1.77803	1.29512	0.74771	-0.88163	-1.03309	1.19183	1.2694	-0.07068	-1.436	-0.26972	0.40921	4.20827	2.18777	0.20796	0.01423	1.64461	1.12776	-0.68134	-0.22361	-0.6662	-0.22361
Beta-ionone	-0.72144	-0.36631	1.65704	0.14372	-0.19707	0.58574	2.03981	1.29512	0.71909	-0.88163	-0.91704	1.33107	1.93301	-0.60828	-1.71653	-0.27312	-1.00534	-0.46868	0.52337	-0.07165	-0.34149	1.62299	0.90813	-0.87788	-0.22361	-0.6662	-0.22361
(-)-camphor	-1.42732	-1.5119	0.38316	0.14372	-2.00999	-0.80631	0.46911	1.29512	-1.58136	-0.88163	-0.88398	-1.05973	0.88071	-3.45552	-2.49155	-0.40253	-1.55214	-0.16409	2.26667	-1.01535	0.15652	1.46825	0.74708	-1.27096	-0.22361	-0.6662	-0.22361
Furaneol methylether	-0.82912	0.20768	-0.90314	0.14372	0.78478	-1.45913	-1.07151	-1.95995	-0.84087	-0.88163	-0.65685	-0.7728	-0.456	1.2733	1.33508	0.53058	0.44487	0.07173	-0.47603	0.48758	0.18023	-0.18524	-0.13141	-0.22275	-0.22361	-0.6662	-0.22361
Phenol	-1.42732	0.02668	0.85248	0.14372	0.78478	0.96255	-1.07151	1.29512	-1.84346	1.07755	1.07458	-1.53567	-0.82572	0.41713	0.69731	0.21897	-0.0425	0.01277	-0.89307	-1.81924	-0.50749	-2.40065	-1.5443	-0.4848	-0.22361	0.54507	-0.22361
4-methylphenol	-1.42732	-0.01381	1.10577	0.14372	0.78478	0.96255	-1.07151	1.29512	-1.26434	1.07755	1.07458	-1.19981	-0.74988	0.36735	0.65695	0.32965	-0.28618	-0.11496	-0.89307	-1.0503	-0.41263	-1.31379	-0.92936	1.74266	-0.22361	0.54507	-0.22361
4-sec-butoxy-2-butanone	0.96551	0.79596	-0.332	0.14372	0.78478	0.96255	0.33069	-0.33242	-0.16675	-0.88163	-0.88398	0.17461	0.57734	-0.52863	0.09587	-1.03766	0.326	-0.3606	-0.34453	-1.0503	-0.62607	0.54342	-0.05088	-0.81237	-0.22361	-0.6662	-0.22361
Butyl 3-hydroxy butrate	1.3364	1.11749	-0.14328	-2.13401	0.78478	-1.43033	0.67974	-1.95995	1.91281	-0.88163	-0.88398	1.59247	0.63422	0.04878	-0.41072	-1.00701	0.79554	-0.37042	0.39938	-0.59593	-0.53121	0.53456	-0.74635	-1.20545	4.24853	-0.6662	4.24853
Butyl butyrate	1.44407	0.63877	-0.41892	1.963	0.78478	0.96255	0.67071	-0.33242	1.57633	-0.88163	-0.88398	1.53693	1.03239	-0.19015	0.11	-1.07001	2.31113	-0.13461	-0.89307	-0.9105	-1.02921	0.03776	-1.02453	-1.33648	-0.22361	-0.6662	-0.22361
2-Phenylethyl acetate	0.57069	-1.55239	-1.33025	-2.76712	-0.96853	-0.27829	0.14413	-0.33242	0.0095	1.07755	1.07458	0.22153	-0.63612	-0.001	-0.19073	1.15038	-0.70817	-0.32129	0.85023	-0.14156	0.2988	0.30661	1.5304	0.43239	-0.22361	-0.6662	-0.22361
Phenylethyl propionate	0.78605	-1.66433	-1.46186	-0.68587	-0.8493	0.24493	0.97462	-0.33242	0.81981	1.07755	1.08219	1.14656	0.22658	0.19811	-0.54796	1.08057	0.53402	-0.37042	0.77885	-0.38622	-0.72092	0.56374	1.65485	0.4979	-0.22361	-0.6662	-0.22361

## Sheet: Fig1E
	32 dragon descriptors of each physiologically active compounds plus (-)-fenchone
Headed descriptots	22	92	96	359	404	433	513	592	678	688	690	698	946	948	959	963	1012	1069	1110	1191	1286	1321	1331	1348	1430	1528	1558
5-hexen-3-one	0.8697	0.28696	1.81828	0.14036	0.81874	1.00602	-1.11924	1.21542	-0.57675	-0.84515	-0.84732	-0.98239	1.23314	0.25201	0.74319	-1.35355	1.20896	-0.14008	-0.71156	-0.62046	-0.72461	-0.93307	-0.96784	0.48641	-0.21822	-0.64384	-0.21822
Ethyl (methylthio) acetate	1.41924	2.43242	-0.21443	0.14036	0.81874	1.00602	-1.11924	-0.25216	0.46435	-0.84515	-0.84732	-0.2956	0.16408	-0.9499	1.03949	-1.61351	-1.23875	-0.18037	-0.93874	1.58618	1.5868	-1.02341	-0.91584	2.49053	-0.21822	-0.64384	-0.21822
ethyl butyrate	1.13862	0.79123	-0.58332	0.14036	0.81874	1.00602	-1.11924	-0.38833	0.11094	-0.84515	-0.84732	-0.32246	0.29661	0.01939	0.99454	-1.29946	1.15429	-0.23074	-0.93874	-0.4103	-0.89315	-0.59964	-1.3467	-0.48333	-0.21822	-0.64384	-0.21822
Gamma-hexalactone	-0.67371	-1.17315	-1.5984	0.14036	0.81874	1.00602	-1.11924	-0.38833	-0.64653	-0.84515	-0.84732	-1.1598	-1.22304	-0.2714	-0.14569	-0.33814	0.97815	-0.18037	-0.7995	0.85063	3.1759	-0.32839	-0.61127	0.93895	-0.21822	-0.64384	-0.21822
4-ethylguaiacol	-0.31124	0.31446	0.22569	0.14036	-1.05974	-1.05133	0.11057	-0.38833	0.15484	1.12687	1.12389	-0.19749	-0.49856	0.86266	-0.28385	0.78544	-0.23051	-0.30126	-0.55766	0.85063	-0.41161	-0.00954	0.34702	0.16316	-0.21822	1.81445	-0.21822
Eugenol	0.13307	0.07837	0.34018	0.14036	-0.79507	-0.81893	0.12553	-0.38833	0.54764	1.12687	1.12389	0.23698	-0.62225	0.59126	0.55343	1.56183	-1.51814	-0.06956	-0.11795	0.92068	0.09402	0.21104	0.93388	0.61571	-0.21822	1.81445	-0.21822
Methyleugenol	0.402	0.24799	0.01708	1.4985	-0.79507	-0.43975	0.85863	-0.38833	1.02936	1.12687	1.12389	0.96385	-1.55877	1.20191	0.48019	1.45017	-0.87432	-0.37178	0.12022	0.74555	-0.05045	0.38735	1.02303	0.55106	-0.21822	1.81445	-0.21822
Creosol	-0.74386	0.60098	0.06542	0.14036	0.81874	-1.4403	-0.76316	-0.38833	-0.66341	1.12687	1.12389	-0.61116	-1.06401	0.69788	0.099	0.16782	-0.38235	-0.23074	-0.93874	0.57042	-0.48384	-0.78926	-0.7227	0.48641	-0.21822	1.81445	-0.21822
Para-tolyl acetate	-0.2177	-0.08208	-1.02853	0.14036	-1.48256	-1.36691	-0.18865	-0.38833	0.05242	1.12687	1.12389	0.0461	-1.17003	0.69788	0.90299	1.30711	-0.17585	-0.26096	0.85306	2.2867	1.56273	-0.25443	0.40645	-0.54798	-0.21822	0.58531	-0.21822
Alpha-ionone	-0.63863	-0.50613	1.44685	0.14036	0.37333	0.62195	1.71441	1.21542	0.79751	-0.84515	-0.99739	1.24209	1.09177	0	-1.05455	-0.28754	0.4376	4.32269	2.06592	0.25519	0.04586	1.55245	1.11217	-0.61263	-0.21822	-0.64384	-0.21822
Beta-ionone	-0.63863	-0.27692	1.68599	0.14036	-0.08499	0.62195	1.97473	1.21542	0.76937	-0.84515	-0.8806	1.38286	1.71023	-0.52341	-1.28592	-0.29103	-1.00794	-0.47252	0.44267	-0.02502	-0.3153	1.53121	0.88931	-0.80658	-0.21822	-0.64384	-0.21822
(-)-camphor	-1.32849	-1.37945	0.38088	0.14036	-1.75368	-0.79692	0.41279	1.21542	-1.49291	-0.84515	-0.84732	-1.03431	0.72953	-3.29555	-1.92512	-0.42363	-1.56673	-0.16022	2.14287	-0.97072	0.19032	1.37921	0.72588	-1.19447	-0.21822	-0.64384	-0.21822
Furaneol methylether	-0.74386	0.2755	-0.93694	0.14036	0.81874	-1.46231	-1.11924	-1.99209	-0.76471	-0.84515	-0.61872	-0.74422	-0.51623	1.30853	1.23091	0.53246	0.47404	0.08155	-0.53201	0.5354	0.2144	-0.24497	-0.16555	-0.16008	-0.21822	-0.64384	-0.21822
Phenol	-1.32849	0.10129	0.86171	0.14036	0.81874	1.00602	-1.11924	1.21542	-1.75066	1.12687	1.12389	-1.5155	-0.8608	0.47495	0.70491	0.21318	-0.02401	0.02111	-0.93874	-1.77632	-0.48384	-2.42111	-1.59928	-0.41868	-0.21822	0.58531	-0.21822
4-methylphenol	-1.32849	0.06233	1.12121	0.14036	0.81874	1.00602	-1.11924	1.21542	-1.18115	1.12687	1.12389	-1.17593	-0.79012	0.42648	0.67161	0.32659	-0.27303	-0.10985	-0.93874	-1.00575	-0.38753	-1.35351	-0.97527	1.77939	-0.21822	0.58531	-0.21822
4-sec-butoxy-2-butanone	1.01001	0.84166	-0.35181	0.14036	0.81874	1.00602	0.27514	-0.38833	-0.10178	-0.84515	-0.84732	0.21365	0.44681	-0.44587	0.20886	-1.0744	0.35256	-0.3617	-0.40376	-1.00575	-0.60422	0.47078	-0.08384	-0.74193	-0.21822	-0.64384	-0.21822
Butyl 3-hydroxy butrate	1.37247	1.1511	-0.15846	-2.19533	0.81874	-1.43296	0.62224	-1.99209	1.94328	-0.84515	-0.84732	1.64715	0.49982	0.11631	-0.20894	-1.04299	0.83239	-0.37178	0.32175	-0.55041	-0.50792	0.46208	-0.78956	-1.12982	4.36436	-0.64384	4.36436
Butyl butyrate	1.47771	0.69038	-0.44085	2.00593	0.81874	1.00602	0.61327	-0.38833	1.61238	-0.84515	-0.84732	1.591	0.87089	-0.11631	0.22052	-1.10755	2.38118	-0.13	-0.93874	-0.86564	-1.01354	-0.02592	-1.07185	-1.25912	-0.21822	-0.64384	-0.21822
2-Phenylethyl acetate	0.62416	-1.41841	-1.37452	-2.84455	-0.79507	-0.25873	0.08962	-0.38833	0.07155	1.12687	1.12389	0.26109	-0.68409	0.06785	-0.02751	1.16753	-0.70426	-0.32141	0.76146	-0.09507	0.33479	0.23817	1.52075	0.48641	-0.21822	-0.64384	-0.21822
Phenylethyl propionate	0.83462	-1.52615	-1.50936	-0.71034	-0.68533	0.27457	0.91548	-0.38833	0.86841	1.12687	1.13154	1.19632	0.11991	0.26171	-0.32213	1.096	0.56514	-0.37178	0.69184	-0.34025	-0.70053	0.49074	1.64703	0.55106	-0.21822	-0.64384	-0.21822
(-)-fenchone	-1.32849	-1.51239	0.23333	0.14036	-1.92798	-0.49847	1.07407	1.21542	-1.24417	-0.84515	-0.84732	-0.74223	1.82509	-1.37638	-2.59594	0.22365	-0.38843	-0.16022	1.35506	-0.9357	-0.6283	1.26022	0.64417	-1.19447	-0.21822	-0.64384	-0.21822
