# Supplementary material for: Olfactory channels associated with the Drosophila maxillary palp mediate short- and long-range attraction
Source: eLife. 2016 May 23;5:e14925. doi: 10.7554/eLife.14925 (PMC4927298; doi:10.7554/eLife.14925)
Supplement: Figure 2—source data 1. — DOI: http://dx.doi.org/10.7554/eLife.14925.014 [file elife-14925-fig2-data1.xlsx]

## Sheet: Fig2 pb1A
	SSR dose response curves pb1A
5-hexen-3-one	Log dilution-7	Log dilution-6	Log dilution-5	Log dilution-4
	10	46	70	164
	30	52	116	160
	14	52	74	144
	24	40	94	176
	12	42	76	168
Average	18	46.4	86	162.4
SD	8.60233	5.54977	19.1311	11.8659
Gamma-hexalactone	Log dilution-7	Log dilution-6	Log dilution-5	Log dilution-4
	2	42	100	174
	0	40	108	180
	2	48	126	166
	4	24	106	186
	0	32	74	138
Average	1.6	37.2	102.8	168.8
SD	1.67332	9.33809	18.7936	18.7403
Ethyl butyrate	Log dilution-7	Log dilution-6	Log dilution-5	Log dilution-4
	0	0	2	42
	2	6	0	50
	4	2	4	38
	2	4	0	56
	2	0	0	44
Average	2	2.4	1.2	46
SD	1.41421	2.60768	1.78885	7.07107
Ethyl (methylthio)acetate	Log dilution-7	Log dilution-6	Log dilution-5	Log dilution-4
	4	10	12	56
	6	8	14	78
	4	10	10	90
	8	8	16	94
Average	5.5	9	13	79.5
SD	1.91485	1.1547	2.58199	17.0783

## Sheet: Fig2a pb1B
	SSR dose response curves pb1B
4-ethylguaiacol	Log dilution-7	Log dilution-6	Log dilution-5	Log dilution-4
	66	150	170	202
	102	160	190	266
	100	142	200	252
	92	140	182	250
	88	138	176	244
Average	89.6	146	183.6	242.8
SD	14.3805	9.05539	11.7813	24.1909
Methyleugenol	Log dilution-7	Log dilution-6	Log dilution-5	Log dilution-4
	34	82	120	180
	42	74	166	202
	24	66	116	200
	32	70	142	180
	36	84	162	216
Average	33.6	75.2	141.2	195.6
SD	6.54217	7.69415	23.0911	15.5177
Eugenol	Log dilution-7	Log dilution-6	Log dilution-5	Log dilution-4
	6	32	90	170
	0	48	82	176
	2	44	84	186
	6	28	74	168
	8	40	100	164
Average	4.4	38.4	86	172.8
SD	3.28634	8.29458	9.69536	8.5557
Creosol	Log dilution-7	Log dilution-6	Log dilution-5	Log dilution-4
	2	40	130	186
	0	38	132	182
	8	32	118	186
	2	28	134	158
	0	30	110	130
Average	2.4	33.6	124.8	168.4
SD	3.28634	5.17687	10.3537	24.4295
Para-tolyl acetate	Log dilution-7	Log dilution-6	Log dilution-5	Log dilution-4
	4	8	18	104
	6	6	24	106
	0	10	32	86
	2	0	40	98
	4	12	26	118
Average	3.2	7.2	28	102.4
SD	2.28035	4.60435	8.3666	11.6962

## Sheet: Fig2 pb2A
	SSR dose response curves pb2A
Furaneol methylether	Log dilution-7	Log dilution-6	Log dilution-5	Log dilution-4
	4	18	76	124
	0	22	88	136
	2	26	70	132
	0	16	56	130
	0	30	62	118
Average	1.2	22.4	70.4	128
SD	1.78885	5.72713	12.4419	7.07107
Alpha-ionone	Log dilution-7	Log dilution-6	Log dilution-5	Log dilution-4
	0	0	24	90
	2	0	50	76
	2	4	34	68
	0	4	28	80
	4	6	30	88
Average	1.6	2.8	33.2	80.4
SD	1.67332	2.68328	10.0598	8.98888
Alpha-ionone	Log dilution-7	Log dilution-6	Log dilution-5	Log dilution-4
	0	10	36	82
	2	4	22	74
	0	0	40	104
	0	0	52	92
	4	2	18	56
Average	1.2	3.2	33.6	81.6
SD	1.78885	4.14729	13.813	18.1879
Alpha-ionone(-)-camphor	Log dilution-7	Log dilution-6	Log dilution-5	Log dilution-4
	2	8	10	106
	2	10	20	76
	4	4	14	52
	2	0	12	60
	2	6	22	54
Average	2.4	5.6	15.6	69.6
SD	0.894427	3.84708	5.17687	22.4232

## Sheet: Fig2 pb2B
	SSR dose response curves pb2B
Phenol	Log dilution-7	Log dilution-6	Log dilution-5	Log dilution-4
	26	76	132	202
	30	62	114	188
	22	50	102	166
	12	32	108	170
	20	42	94	156
Average	22	52.4	110	176.4
SD	6.0663	15.3571	12.8374	16.4633
4-methylPhenol	Log dilution-7	Log dilution-6	Log dilution-5	Log dilution-4
	0	4	60	132
	4	2	42	114
	6	6	66	116
	8	10	54	134
	0	0	44	100
Average	3.6	4.4	53.2	119.2
SD	3.57771	3.84708	10.2567	14.0428

## Sheet: Fig2 pb3A
	SSR dose response curves pb3A
Butyl 3-hydroxy butyrate	Log dilution-7	Log dilution-6	Log dilution-5	Log dilution-4
	0	0	0	44
	2	2	4	74
	0	6	10	66
	0	0	2	82
	0	2	0	52
Average	0.4	2	3.2	63.6
SD	0.894427	2.44949	4.14729	15.582
Butyl butyrate	Log dilution-7	Log dilution-6	Log dilution-5	Log dilution-4
	6	4	10	42
	2	8	2	26
	2	0	0	14
	4	4	6	30
	0	0	2	10
Average	2.8	3.2	4	24.4
SD	2.28035	3.34664	4	12.8374
4-sec-butoxy-2-butanoate	Log dilution-7	Log dilution-6	Log dilution-5	Log dilution-4
	0	2	2	20
	2	0	4	10
	0	0	0	16
	4	2	4	32
	2	4	4	24
Average	1.6	1.6	2.8	20.4
SD	1.67332	1.67332	1.78885	8.29458

## Sheet: Fig2 pb3B
	SSR dose response curves pb3B
2-phenethyl acetate	Log dilution-7	Log dilution-6	Log dilution-5	Log dilution-4
	120	212	244	240
	130	184	208	256
	80	156	224	244
	80	136	216	238
	78	148	202	260
Average	97.6	167.2	218.8	247.6
SD	25.2745	30.6464	16.3463	9.8387
Phenethyl propionate	Log dilution-7	Log dilution-6	Log dilution-5	Log dilution-4
	20	58	122	230
	16	44	92	200
	20	36	88	220
	32	60	106	200
	18	46	90	222
Average	21.2	48.8	99.6	214.4
SD	6.26099	10.0598	14.3805	13.6675
