# Supplementary material for: Olfactory channels associated with the Drosophila maxillary palp mediate short- and long-range attraction
Source: eLife. 2016 May 23;5:e14925. doi: 10.7554/eLife.14925 (PMC4927298; doi:10.7554/eLife.14925)
Supplement: Figure 4—source data 1. — DOI: http://dx.doi.org/10.7554/eLife.14925.018 [file elife-14925-fig4-data1.xlsx]

## Sheet: Butyl 3-hydroxy butyrate-ab2B
	GC-SSR dose response curve
Butyl 3-hydroxy butyrate	Log dilution-4							Log dilution-5							Log dilution-6							Log dilution-7
	T[ms]	F[Hz]	F[Hz]	F[Hz]	Average	SD		T[ms]	F[Hz]	F[Hz]	F[Hz]	Average	SD		T[ms]	F[Hz]	F[Hz]	F[Hz]	Average	SD		T[ms]	F[Hz]	F[Hz]	F[Hz]	Average	SD
	150000	1	1	1	1	0		150000	2.9	2.9	2.9	2.9	0		150000	10.1	8.7	6.2	8.33333	1.97569		150000	2.3	3.8	3.2	3.1	0.754983
	150500	1.7	1.1	1.1	1.3	0.34641		150500	2.1	4.2	2.4	2.9	1.13578		150500	13.9	6.2	6.2	8.76667	4.4456		150500	2.9	5.3	5.3	4.5	1.38564
	151000	2.5	1.2	1.2	1.63333	0.750555		151000	1.5	1.6	3.1	2.06667	0.896289		151000	13.8	9.8	5.9	9.83333	3.95011		151000	13.1	14.9	14.9	14.3	1.03923
	151500	2.9	3.2	4.8	3.63333	1.02144		151500	1.4	1.7	2.5	1.86667	0.568624		151500	17.8	13.8	8.7	13.4333	4.56107		151500	6.8	6.8	4.7	6.1	1.21244
	152000	1.4	2.9	3.2	2.5	0.964365		152000	1.3	2.7	2.7	2.23333	0.80829		152000	6.5	6.5	6.5	6.5	0		152000	0.9	4.4	2.9	2.73333	1.75594
	152500	7.5	10.9	12.1	10.1667	2.38607		152500	2.3	3.6	2.8	2.9	0.655744		152500	5.9	5.9	5.4	5.73333	0.288675		152500	0.5	1.1	1.1	0.9	0.34641
	153000	2.3	2.3	2.3	2.3	0		153000	1.6	2.4	1.8	1.93333	0.416333		153000	12.4	7.1	1.8	7.1	5.3		153000	0.5	0.6	0.6	0.566667	0.057735
	153500	0.4	0.4	0.4	0.4	6.7987e-17		153500	2.1	3.3	3.1	2.83333	0.64291		153500	7.6	3.8	0.9	4.1	3.36006		153500	0.5	0.6	0.6	0.566667	0.057735
	154000	0.4	0.4	0.4	0.4	6.7987e-17		154000	3	3	3	3	0		154000	3.9	3.9	1.7	3.16667	1.27017		154000	0.5	1.5	1.5	1.16667	0.57735
	154500	0.4	0.4	0.4	0.4	6.7987e-17		154500	3	3	3	3	0		154500	13.4	11.7	9.4	11.5	2.00749		154500	0.6	2.3	2.3	1.73333	0.981495
	155000	0.4	0.4	0.4	0.4	6.7987e-17		155000	2.1	2.1	2.4	2.2	0.173205		155000	28.2	22.6	14.6	21.8	6.8352		155000	0.6	1.9	1.9	1.46667	0.750555
	155500	0.8	0.8	0.8	0.8	1.35974e-16		155500	10.5	10.5	12	11	0.866025		155500	16.8	16.8	8.4	14	4.84974		155500	0.6	3	3	2.2	1.38564
	156000	12.8	12.8	13.9	13.1667	0.635085		156000	6.8	6.8	6.8	6.8	0		156000	11.3	6.5	4.9	7.56667	3.33067		156000	0.8	3.7	3.7	2.73333	1.67432
	156500	8.8	8.8	10.6	9.4	1.03923		156500	3.9	6.4	3.9	4.73333	1.44338		156500	7.7	5.1	5.1	5.96667	1.50111		156500	1.1	3.6	3.6	2.76667	1.44338
	157000	2.6	2.6	2.6	2.6	0		157000	1	2.1	1	1.36667	0.635085		157000	6.3	6.3	4.4	5.66667	1.09697		157000	1	2.9	2.9	2.26667	1.09697
	157500	1.3	1.3	1.3	1.3	0		157500	1.6	2.3	1.6	1.83333	0.404145		157500	23	17.7	10.6	17.1	6.22174		157500	3.4	7.9	6.6	5.96667	2.31589
	158000	0.8	0.8	1.5	1.03333	0.404145		158000	2.5	2.5	2.5	2.5	0		158000	16	11.9	7	11.6333	4.50592		158000	2.7	6.2	5.2	4.7	1.80278
	158500	0.3	0.3	0.6	0.4	0.173205		158500	2.8	3.7	2.8	3.1	0.519615		158500	8.4	8.4	5.7	7.5	1.55885		158500	0.6	1.3	1.3	1.06667	0.404145
	159000	0.3	0.3	0.6	0.4	0.173205		159000	9.4	9.4	9.4	9.4	0		159000	7.6	6.1	6.1	6.6	0.866025		159000	0.6	1.2	1.2	1	0.34641
	159500	0.3	0.3	1.1	0.566667	0.46188		159500	4	6.2	7.6	5.93333	1.81475		159500	9.1	8	5.4	7.5	1.9		159500	2.2	4.7	4.7	3.86667	1.44338
	160000	0.3	0.3	2.2	0.933333	1.09697		160000	1.1	2.2	2.2	1.83333	0.635085		160000	7.1	6.6	4	5.9	1.66433		160000	1.5	3.1	3.1	2.56667	0.92376
	160500	0.3	0.3	1.6	0.733333	0.750555		160500	1.9	2.7	2.4	2.33333	0.404145		160500	18.8	11.3	3.8	11.3	7.5		160500	0.8	0.9	0.9	0.866667	0.057735
	161000	0.3	0.3	0.9	0.5	0.34641		161000	3.7	3.7	3.7	3.7	5.43896e-16		161000	8	6.4	5.8	6.73333	1.13725		161000	1.6	1.9	1.3	1.6	0.3
	161500	0.3	0.3	0.9	0.5	0.34641		161500	2.6	3.8	3.8	3.4	0.69282		161500	11.9	11.9	6.8	10.2	2.94449		161500	1.1	1.7	1.7	1.5	0.34641
	162000	0.6	0.6	1.4	0.866667	0.46188		162000	7.2	10.6	9.2	9	1.7088		162000	10.2	5.8	4.7	6.9	2.91033		162000	0.8	0.8	0.8	0.8	1.35974e-16
	162500	1.4	1.4	1.4	1.4	2.71948e-16		162500	3.8	3.8	4.3	3.96667	0.288675		162500	18.8	15.6	10	14.8	4.45421		162500	0.8	0.8	0.8	0.8	1.35974e-16
	163000	2.7	2.7	2.7	2.7	5.43896e-16		163000	2.8	2.8	4.7	3.43333	1.09697		163000	12.8	9.6	5.5	9.3	3.65923		163000	3	3	3	3	0
	163500	1	1	1	1	0		163500	2.8	2.8	3	2.86667	0.11547		163500	13.3	7.3	4.2	8.26667	4.62637		163500	0.8	2.5	1.7	1.66667	0.85049
	164000	3.7	3.7	3.8	3.73333	0.057735		164000	2.8	2.8	2.8	2.8	5.43896e-16		164000	9.6	9.6	6.9	8.7	1.55885		164000	0.3	1.8	1.6	1.23333	0.814453
	164500	2	2	3	2.33333	0.57735		164500	2.4	2.4	4.3	3.03333	1.09697		164500	21.3	16	10.7	16	5.3		164500	0.3	3.2	3.2	2.23333	1.67432
	165000	2	2	2	2	0		165000	2.6	3.4	4.1	3.36667	0.750555		165000	24.3	15	8.1	15.8	8.12958		165000	0.3	1.5	1.5	1.1	0.69282
	165500	1.3	1.3	1.8	1.46667	0.288675		165500	7.2	7.2	9	7.8	1.03923		165500	11.5	9.8	6.5	9.26667	2.54231		165500	0.3	2.1	2.1	1.5	1.03923
	166000	0.5	0.5	0.6	0.533333	0.057735		166000	6.1	7.3	7.3	6.9	0.69282		166000	2.3	2.1	2.1	2.16667	0.11547		166000	0.3	2	2	1.43333	0.981495
	166500	0.5	0.5	0.6	0.533333	0.057735		166500	1.8	1.8	3	2.2	0.69282		166500	2.7	2.7	2.4	2.6	0.173205		166500	0.3	3.2	3	2.16667	1.61967
	167000	0.5	0.5	1.9	0.966667	0.80829		167000	2.7	2.7	4	3.13333	0.750555		167000	12.2	8.7	5.2	8.7	3.5		167000	2.3	11.7	9.4	7.8	4.9
	167500	0.5	0.5	1	0.666667	0.288675		167500	4.9	5.7	9.1	6.56667	2.2301		167500	17.3	10.7	8.9	12.3	4.42267		167500	2.1	2.8	2.8	2.56667	0.404145
	168000	0.6	0.6	0.6	0.6	0		168000	1.2	1.2	2.4	1.6	0.69282		168000	14.9	12.7	9.3	12.3	2.82135		168000	0.8	0.8	0.8	0.8	1.35974e-16
	168500	0.6	0.6	0.6	0.6	0		168500	1.7	1.7	2.2	1.86667	0.288675		168500	24.3	18.7	8.8	17.2667	7.84878		168500	0.8	0.8	0.8	0.8	1.35974e-16
	169000	0.8	0.8	0.8	0.8	1.35974e-16		169000	1.4	1.4	1.4	1.4	2.71948e-16		169000	10.3	8.9	4.7	7.96667	2.91433		169000	1.7	2.3	2.3	2.1	0.34641
	169500	1.2	1.2	1.2	1.2	0		169500	1.5	2.3	2.3	2.03333	0.46188		169500	18.1	13.2	8.2	13.1667	4.95008		169500	0.6	1.3	1.3	1.06667	0.404145
	170000	3.6	3.6	3.6	3.6	0		170000	3	4	6.6	4.53333	1.85831		170000	12	10.5	7.5	10	2.29129		170000	0.6	1.3	1.2	1.03333	0.378594
	170500	8.7	8.7	8.7	8.7	0		170500	2.4	2.4	2.9	2.56667	0.288675		170500	9.4	7.9	4.7	7.33333	2.40069		170500	1.4	2.9	2.2	2.16667	0.750555
	171000	1.9	1.9	1.9	1.9	2.71948e-16		171000	7.5	7.5	8.4	7.8	0.519615		171000	6.6	6.6	2.9	5.36667	2.1362		171000	0.9	2.7	2.7	2.1	1.03923
	171500	0.5	0.5	0.5	0.5	0		171500	5.8	5.8	9.4	7	2.07846		171500	20.2	18.3	11	16.5	4.85695		171500	0.9	1.7	1.7	1.43333	0.46188
	172000	0.5	0.5	0.5	0.5	0		172000	3.4	3.4	4.7	3.83333	0.750555		172000	15.1	11.3	5.7	10.7	4.72864		172000	3.4	5.4	5.4	4.73333	1.1547
	172500	0.5	0.5	0.5	0.5	0		172500	1.2	1.2	1.7	1.36667	0.288675		172500	14.3	11.1	2.7	9.36667	5.9911		172500	1.7	5.5	4.4	3.86667	1.95533
	173000	0.5	0.5	0.5	0.5	0		173000	1.8	1.8	3.7	2.43333	1.09697		173000	13	8.3	4.7	8.66667	4.16213		173000	2.7	4.3	3.7	3.56667	0.80829
	173500	2.3	2.3	2.3	2.3	0		173500	3	3	3.9	3.3	0.519615		173500	8.8	8.8	4.3	7.3	2.59808		173500	0.7	1.1	1.1	0.966667	0.23094
	174000	3.4	3.4	3.4	3.4	0		174000	1	1	1.1	1.03333	0.057735		174000	11.3	11.3	4.4	9	3.98372		174000	0.7	1.4	1.4	1.16667	0.404145
	174500	1	1	1	1	0		174500	2	2	2.7	2.23333	0.404145		174500	14.2	12.7	7.5	11.4667	3.51615		174500	1.2	2.5	2.5	2.06667	0.750555
	175000	0.8	0.8	0.8	0.8	1.35974e-16		175000	2.6	3.9	2.6	3.03333	0.750555		175000	15.4	13.5	11.6	13.5	1.9		175000	4.6	5.3	5.3	5.06667	0.404145
	175500	0.8	0.8	0.8	0.8	1.35974e-16		175500	3.3	4.3	3.3	3.63333	0.57735		175500	5.3	5.3	4.6	5.06667	0.404145		175500	1	1	1	1	0
	176000	0.8	0.8	0.8	0.8	1.35974e-16		176000	1.1	1.1	1.1	1.1	0		176000	6.3	6.3	5.4	6	0.519615		176000	1.8	1.8	1.8	1.8	0
	176500	0.8	0.8	0.8	0.8	1.35974e-16		176500	2.3	2.3	2.3	2.3	0		176500	10.8	7.7	5.4	7.96667	2.70986		176500	1.4	2.7	2.7	2.26667	0.750555
	177000	2.7	2.7	2.7	2.7	5.43896e-16		177000	3.1	8.4	7.1	6.2	2.76225		177000	10.7	9.1	4.6	8.13333	3.1628		177000	0.7	1.8	1.8	1.43333	0.635085
	177500	14.8	14.8	14.8	14.8	2.17558e-15		177500	1.1	2.2	2.2	1.83333	0.635085		177500	12.7	9.1	5.9	9.23333	3.40196		177500	2.6	5.4	4.4	4.13333	1.41892
	178000	5	5	5	5	0		178000	1.4	1.6	1.6	1.53333	0.11547		178000	13.3	11.5	6.6	10.4667	3.46747		178000	2.9	2.9	2.9	2.9	0
	178500	0.7	0.7	0.9	0.766667	0.11547		178500	1.9	1.9	1.9	1.9	2.71948e-16		178500	4.1	3.3	2.8	3.4	0.655744		178500	0.9	0.9	0.9	0.9	0
	179000	0.5	0.5	0.7	0.566667	0.11547		179000	2.7	2.7	2.7	2.7	5.43896e-16		179000	7.1	5.9	4.7	5.9	1.2		179000	1.1	1.8	1.2	1.36667	0.378594
	179500	0.5	0.5	0.7	0.566667	0.11547		179500	12.1	12.1	12.1	12.1	0		179500	10.3	8.6	7.5	8.8	1.41067		179500	1.3	2.7	2.7	2.23333	0.80829
	180000	0.5	0.5	1	0.666667	0.288675		180000	9.5	9.5	9.5	9.5	0		180000	12.3	8.2	6.8	9.1	2.85832		180000	2.4	5.1	3.1	3.53333	1.40119
	180500	0.5	0.5	1.9	0.966667	0.80829		180500	3.2	3.2	5.5	3.96667	1.32791		180500	12.7	7.5	6.3	8.83333	3.40196		180500	0.9	2.1	2.1	1.7	0.69282
	181000	3.1	3.1	7.4	4.53333	2.48261		181000	1.5	1.5	2.9	1.96667	0.80829		181000	9.6	8	5.8	7.8	1.90788		181000	1.1	3.4	2.3	2.26667	1.15036
	181500	3.8	3.8	3.8	3.8	5.43896e-16		181500	2.5	2.7	3.7	2.96667	0.64291		181500	8	8	3.2	6.4	2.77128		181500	1.4	4.6	4	3.33333	1.70098
	182000	0.7	0.7	0.7	0.7	1.35974e-16		182000	2.9	3.9	4.8	3.86667	0.950438		182000	6.6	6.6	6.5	6.56667	0.057735		182000	1.2	3.6	3.6	2.8	1.38564
	182500	0.7	0.7	0.7	0.7	1.35974e-16		182500	5.5	5.5	6.8	5.93333	0.750555		182500	12.4	12.4	4.7	9.83333	4.4456		182500	0.6	1.2	1.2	1	0.34641
	183000	0.7	0.7	0.7	0.7	1.35974e-16		183000	13.9	14.4	18.2	15.5	2.3516		183000	13.1	9.8	5.8	9.56667	3.65559		183000	0.6	1.2	1.2	1	0.34641
	183500	0.8	0.8	0.8	0.8	1.35974e-16		183500	3.3	4.3	4.3	3.96667	0.57735		183500	9.2	9.2	7.9	8.76667	0.750555		183500	2.2	5.1	5.1	4.13333	1.67432
	184000	0.8	0.8	0.8	0.8	1.35974e-16		184000	2.7	2.7	2.7	2.7	5.43896e-16		184000	15.9	14.2	9.4	13.1667	3.37095		184000	11.7	13.7	13.7	13.0333	1.1547
	184500	1.8	1.8	1.8	1.8	0		184500	2.9	2.9	2.9	2.9	0		184500	18.9	14.8	7.5	13.7333	5.77437		184500	7.1	7.1	7.1	7.1	1.08779e-15
	185000	0.4	0.4	0.4	0.4	6.7987e-17		185000	2.3	2.3	2.3	2.3	0		185000	8.1	8.1	7.8	8	0.173205		185000	8.4	9.6	6	8	1.83303
	185500	0.4	0.4	0.4	0.4	6.7987e-17		185500	3.2	3.2	3.2	3.2	5.43896e-16		185500	12.5	12.5	9.4	11.4667	1.78979		185500	4	6.9	6.6	5.83333	1.59478
	186000	0.4	0.4	0.4	0.4	6.7987e-17		186000	2.1	3	4.3	3.13333	1.10604		186000	10.9	10.9	9.3	10.3667	0.92376		186000	4.2	5.6	4.2	4.66667	0.80829
	186500	0.4	0.4	0.4	0.4	6.7987e-17		186500	1.5	3	3	2.5	0.866025		186500	11	11	7.2	9.73333	2.19393		186500	2.7	6.9	6.2	5.26667	2.25019
	187000	0.7	0.7	1.1	0.833333	0.23094		187000	2.2	2.6	3.3	2.7	0.556776		187000	13.1	13.1	9.3	11.8333	2.19393		187000	1	2	1.8	1.6	0.52915
	187500	4.1	4.1	4.8	4.33333	0.404145		187500	2.8	2.8	2.8	2.8	5.43896e-16		187500	10	10	5.5	8.5	2.59808		187500	2.1	2.9	2.2	2.4	0.43589
	188000	3	3	3	3	0		188000	7.2	7.2	8.5	7.63333	0.750555		188000	5.5	5.1	1.7	4.1	2.08806		188000	5.3	5.3	4.3	4.96667	0.57735
	188500	2.5	2.5	2.5	2.5	0		188500	8.8	8.8	10.5	9.36667	0.981495		188500	21.6	16.2	5.6	14.4667	8.13962		188500	3.7	3.7	0.9	2.76667	1.61658
	189000	0.8	0.8	0.8	0.8	1.35974e-16		189000	3.7	3.7	4.8	4.06667	0.635085		189000	16	14.2	10	13.4	3.07896		189000	1	1	0.5	0.833333	0.288675
	189500	0.8	0.8	0.8	0.8	1.35974e-16		189500	2	2	2	2	0		189500	9.5	9.5	6.3	8.43333	1.84752		189500	0.6	0.6	0.5	0.566667	0.057735
	190000	3.1	3.1	3.1	3.1	0		190000	3	3	3.2	3.06667	0.11547		190000	8.2	8.2	7.2	7.86667	0.57735		190000	0.6	0.6	0.5	0.566667	0.057735
	190500	2.6	2.6	2.6	2.6	0		190500	1.7	2.1	4.1	2.63333	1.28582		190500	3.2	2.8	1.5	2.5	0.888819		190500	0.7	1	0.8	0.833333	0.152753
	191000	0.8	0.8	0.8	0.8	1.35974e-16		191000	1.7	3.4	3.4	2.83333	0.981495		191000	10.2	8.5	1.1	6.6	4.83839		191000	0.7	2.4	2.4	1.83333	0.981495
	191500	0.8	0.8	0.8	0.8	1.35974e-16		191500	2.9	4	3.4	3.43333	0.550757		191500	7.7	5.5	2.4	5.2	2.66271		191500	0.7	2	2	1.56667	0.750555
	192000	0.9	0.9	0.9	0.9	0		192000	2.6	2.6	2.6	2.6	0		192000	6.8	6.8	6.3	6.63333	0.288675		192000	1.9	4	4	3.3	1.21244
	192500	1	1	1	1	0		192500	3.7	4.6	3.7	4	0.519615		192500	12.4	11	6.9	10.1	2.85832		192500	3.4	4.3	4.3	4	0.519615
	193000	6.4	6.4	6.4	6.4	1.08779e-15		193000	3	3	3	3	0		193000	21.2	19.3	11.5	17.3333	5.14036		193000	2.7	3.7	3.7	3.36667	0.57735
	193500	2.9	2.9	2.9	2.9	0		193500	6.2	7.4	6.2	6.6	0.69282		193500	16.8	9.2	9.2	11.7333	4.38786		193500	1.7	5.1	4.9	3.9	1.90788
	194000	1.8	1.8	1.8	1.8	0		194000	5.1	5.1	5.1	5.1	0		194000	10.1	10.1	6.3	8.83333	2.19393		194000	1	2.6	1.3	1.63333	0.85049
	194500	3.1	3.1	5.4	3.86667	1.32791		194500	2.4	3.7	4.9	3.66667	1.25033		194500	7.9	7.9	6.1	7.3	1.03923		194500	0.3	1	0.7	0.666667	0.351188
	195000	1.3	1.3	2.5	1.7	0.69282		195000	1.7	2.3	3	2.33333	0.650641		195000	11.2	11.2	5.6	9.33333	3.23316		195000	0.3	1	0.8	0.7	0.360555
	195500	4.5	4.5	5.9	4.96667	0.80829		195500	4.8	4.8	6.2	5.26667	0.80829		195500	19.4	16.6	12.5	16.1667	3.47035		195500	0.3	1	1	0.766667	0.404145
	196000	7.8	7.8	7.8	7.8	0		196000	6.5	8.5	7.6	7.53333	1.00167		196000	7.6	7.6	5.7	6.96667	1.09697		196000	0.3	1.1	1.1	0.833333	0.46188
	196500	1.7	1.7	1.7	1.7	0		196500	5.2	6.6	5.2	5.66667	0.80829		196500	14.6	14.6	7.9	12.3667	3.86825		196500	0.3	1.2	1.2	0.9	0.519615
	197000	1.1	1.1	1.1	1.1	0		197000	4.4	5.5	7.4	5.76667	1.51767		197000	9.1	9.1	7.6	8.6	0.866025		197000	0.6	3.9	3.9	2.8	1.90526
	197500	1.1	1.1	1.4	1.2	0.173205		197500	3.1	3.1	4.6	3.6	0.866025		197500	8.1	4.7	4.7	5.83333	1.96299		197500	6.8	10	9.8	8.86667	1.79258
	198000	0.5	0.5	0.8	0.6	0.173205		198000	2.5	2.5	2.5	2.5	0		198000	16.5	11.4	10	12.6333	3.42101		198000	6.7	8.3	6.9	7.3	0.87178
	198500	0.5	0.5	1.1	0.7	0.34641		198500	4.2	4.2	4.2	4.2	0		198500	7.6	7.6	4	6.4	2.07846		198500	2.1	2.4	2.4	2.3	0.173205
	199000	2	2	5.4	3.13333	1.96299		199000	8.1	9.5	9.5	9.03333	0.80829		199000	13.2	13.2	5.9	10.7667	4.21466		199000	1.3	4.8	4.8	3.63333	2.02073
	199500	5.3	5.3	5.3	5.3	0		199500	3.2	3.2	3.2	3.2	5.43896e-16		199500	10.4	7.4	7.4	8.4	1.73205		199500	0.5	2.3	2.3	1.7	1.03923
	200000	2	2.6	3.3	2.63333	0.650641		200000	7.5	7.5	7.5	7.5	0		200000	8.9	8.9	5.5	7.76667	1.96299		200000	0.5	1.2	1.2	0.966667	0.404145
	200500	1.2	1.4	1.4	1.33333	0.11547		200500	3.6	3.6	5.4	4.2	1.03923		200500	11.5	11.2	4.2	8.96667	4.13078		200500	0.5	2.8	2.8	2.03333	1.32791
	201000	0.7	0.8	0.8	0.766667	0.057735		201000	6	6	8	6.66667	1.1547		201000	18.8	17	10.6	15.4667	4.30968		201000	0.5	6	5.9	4.13333	3.14696
	201500	0.5	0.5	0.5	0.5	0		201500	3.5	5.8	4.7	4.66667	1.15036		201500	20.4	15.3	7.8	14.5	6.33798		201500	2.9	12.9	11.5	9.1	5.41479
	202000	0.5	0.5	0.5	0.5	0		202000	6.2	9.6	7.8	7.86667	1.70098		202000	11.8	8.8	7.4	9.33333	2.24796		202000	8.5	11.1	11.1	10.2333	1.50111
	202500	0.5	0.5	0.5	0.5	0		202500	18.5	18.5	18.5	18.5	0		202500	6.8	5.9	4.1	5.6	1.37477		202500	4.3	4.3	3.4	4	0.519615
	203000	2	2	2.1	2.03333	0.057735		203000	3.6	3.6	3.6	3.6	0		203000	13.6	13.6	8.8	12	2.77128		203000	3.2	3.2	1.6	2.66667	0.92376
	203500	0.8	0.8	1.1	0.9	0.173205		203500	3.1	3.1	4.8	3.66667	0.981495		203500	22.8	15.8	10.5	16.3667	6.16955		203500	2.3	5	3.4	3.56667	1.35769
	204000	0.8	0.8	1.7	1.1	0.519615		204000	1.3	1.3	3.8	2.13333	1.44338		204000	11.2	10	8.7	9.96667	1.25033		204000	0.9	1.9	1.9	1.56667	0.57735
	204500	1.3	1.3	4.7	2.43333	1.96299		204500	1.7	1.7	3	2.13333	0.750555		204500	5	5	4.3	4.76667	0.404145		204500	1.3	5.4	3.6	3.43333	2.05508
	205000	3.3	3.3	3.3	3.3	5.43896e-16		205000	2.4	3.6	2.4	2.8	0.69282		205000	10.1	8.6	5.7	8.13333	2.23681		205000	0.3	2.4	2.3	1.66667	1.18462
	205500	1.1	1.1	1.1	1.1	0		205500	5.2	6.3	5.2	5.56667	0.635085		205500	9.8	7.8	6.8	8.13333	1.52753		205500	0.3	1.8	1.8	1.3	0.866025
	206000	2.3	2.3	2.6	2.4	0.173205		206000	5.4	7.2	7.2	6.6	1.03923		206000	14.6	13.2	7.9	11.9	3.53412		206000	0.3	1.5	1.5	1.1	0.69282
	206500	0.6	0.6	0.8	0.666667	0.11547		206500	4.3	5.3	5.9	5.16667	0.80829		206500	7	7	6.5	6.83333	0.288675		206500	0.3	1.7	1.7	1.23333	0.80829
	207000	0.6	0.6	0.8	0.666667	0.11547		207000	9.5	9.5	10.7	9.9	0.69282		207000	10.2	10	8.8	9.66667	0.757188		207000	0.3	1.2	1.2	0.9	0.519615
	207500	1.1	1.1	1.4	1.2	0.173205		207500	9.8	9.8	9.8	9.8	0		207500	14.1	12.4	7.9	11.4667	3.20364		207500	0.3	1.5	1.5	1.1	0.69282
	208000	0.9	0.9	0.9	0.9	0		208000	5.8	5.8	5.8	5.8	0		208000	16.2	16.2	11.3	14.5667	2.82902		208000	0.5	2.4	2.4	1.76667	1.09697
	208500	0.9	0.9	0.9	0.9	0		208500	4.6	4.6	4.6	4.6	0		208500	7.4	7.4	5.6	6.8	1.03923		208500	8.6	9.8	9.8	9.4	0.69282
	209000	2.2	2.2	2.2	2.2	0		209000	3.1	3.1	6.5	4.23333	1.96299		209000	14.3	11.2	6.7	10.7333	3.82143		209000	2.5	2.7	2.7	2.63333	0.11547
	209500	1.1	1.1	1.1	1.1	0		209500	1.2	1.2	2.4	1.6	0.69282		209500	12.6	10.3	8.4	10.4333	2.10317		209500	0.7	0.7	0.7	0.7	1.35974e-16
	210000	4.7	4.7	4.7	4.7	0		210000	5.2	5.2	6	5.46667	0.46188		210000	8	6.4	4.8	6.4	1.6		210000	0.7	0.7	0.7	0.7	1.35974e-16
	210500	2.5	2.5	2.5	2.5	0		210500	2.2	3.2	2.2	2.53333	0.57735		210500	20	10.9	6.5	12.4667	6.88501		210500	1	1.9	1.4	1.43333	0.450925
	211000	3.2	3.2	3.2	3.2	5.43896e-16		211000	0.9	0.9	0.9	0.9	0		211000	16.5	12.8	4.9	11.4	5.92537		211000	0.8	1.6	1.5	1.3	0.43589
	211500	3.7	3.7	4.8	4.06667	0.635085		211500	1.6	2.1	1.6	1.76667	0.288675		211500	9.1	8	3.6	6.9	2.91033		211500	0.8	1.3	1.3	1.13333	0.288675
	212000	0.8	0.8	1.2	0.933333	0.23094		212000	1.3	1.3	1.3	1.3	0		212000	8.3	5.5	4	5.93333	2.18251		212000	2.6	6.8	4.5	4.63333	2.10317
	212500	1.5	1.5	2.3	1.76667	0.46188		212500	1.6	1.6	2.3	1.83333	0.404145		212500	16.6	9	9	11.5333	4.38786		212500	0.6	3.9	3.9	2.8	1.90526
	213000	7.9	7.9	7.9	7.9	1.08779e-15		213000	2.9	3.6	3.9	3.46667	0.51316		213000	10.9	10.9	7.8	9.86667	1.78979		213000	0.6	2.5	2.5	1.86667	1.09697
	213500	1.1	1.1	1.1	1.1	0		213500	3	3.5	3	3.16667	0.288675		213500	11.4	11.4	9.6	10.8	1.03923		213500	1.2	3.2	3.2	2.53333	1.1547
	214000	0.4	0.4	0.4	0.4	6.7987e-17		214000	2.9	3.9	4.1	3.63333	0.64291		214000	8	6.7	5.3	6.66667	1.35031		214000	2.7	2.7	2.7	2.7	5.43896e-16
	214500	0.4	0.4	0.4	0.4	6.7987e-17		214500	2.4	2.6	3.6	2.86667	0.64291		214500	9.2	9.2	8.6	9	0.34641		214500	1.2	1.2	1.2	1.2	0
	215000	0.4	0.4	0.4	0.4	6.7987e-17		215000	6.5	7.6	7.6	7.23333	0.635085		215000	11.5	10.1	7.2	9.6	2.19317		215000	2.3	5.2	5.2	4.23333	1.67432
	215500	0.4	0.4	0.4	0.4	6.7987e-17		215500	2.6	2.9	3.7	3.06667	0.568624		215500	13.6	13.6	7.5	11.5667	3.52184		215500	0.5	2.7	2.7	1.96667	1.27017
	216000	0.5	0.8	0.8	0.7	0.173205		216000	1	1.2	2.1	1.43333	0.585947		216000	5.6	5.6	3.7	4.96667	1.09697		216000	0.5	2.6	2.6	1.9	1.21244
	216500	0.7	0.8	0.8	0.766667	0.057735		216500	1.3	2	3.8	2.36667	1.2897		216500	7.7	6.6	4	6.1	1.9		216500	0.5	1.8	1.8	1.36667	0.750555
	217000	1.4	1.5	1.5	1.46667	0.057735		217000	1.8	1.8	2.7	2.1	0.519615		217000	7	6.1	3.9	5.66667	1.59478		217000	0.6	1.5	1.5	1.2	0.519615
	217500	12	12	12	12	0		217500	1.8	1.8	1.8	1.8	0		217500	8	6.4	6.4	6.93333	0.92376		217500	0.8	0.8	0.8	0.8	1.35974e-16
	218000	4.3	4.3	4.3	4.3	0		218000	2.4	2.4	2.4	2.4	0		218000	17.4	14.8	13.1	15.1	2.16564		218000	3.2	3.2	2.4	2.93333	0.46188
	218500	1	1	1	1	0		218500	1	1	1	1	0		218500	8.3	4.1	3.9	5.43333	2.48462		218500	0.7	2.8	2.8	2.1	1.21244
	219000	3.8	3.8	3.8	3.8	5.43896e-16		219000	1.2	1.2	2.9	1.76667	0.981495		219000	15.2	11.4	7.6	11.4	3.8		219000	0.4	1.8	1.8	1.33333	0.80829
	219500	3.4	3.4	3.4	3.4	0		219500	2.7	3.5	4.6	3.6	0.953939		219500	15.8	14.5	7.9	12.7333	4.23596		219500	0.4	1.1	1.1	0.866667	0.404145
	220000	1	1	1	1	0		220000	2.1	3.2	3.5	2.93333	0.737111		220000	7.3	7.3	5.4	6.66667	1.09697		220000	0.4	0.7	0.7	0.6	0.173205
	220500	2.2	2.2	2.2	2.2	0		220500	3.1	3.5	4	3.53333	0.450925		220500	5.3	5.3	4	4.86667	0.750555		220500	0.4	1.3	1.3	1	0.519615
	221000	1.3	1.3	1.3	1.3	0		221000	1	1.3	1	1.1	0.173205		221000	6.4	5.4	3.2	5	1.63707		221000	0.4	1.7	1.7	1.26667	0.750555
	221500	3.5	3.5	3.5	3.5	0		221500	4.4	5.3	4.4	4.7	0.519615		221500	9.7	9.7	5.1	8.16667	2.65581		221500	0.5	1	1	0.833333	0.288675
	222000	5.4	5.4	5.4	5.4	1.08779e-15		222000	13.7	13.7	15.4	14.2667	0.981495		222000	9.9	9.9	8.5	9.43333	0.80829		222000	0.5	1.1	1.1	0.9	0.34641
	222500	1.4	1.4	1.4	1.4	2.71948e-16		222500	3.7	3.7	3.7	3.7	5.43896e-16		222500	5.8	5.8	5.8	5.8	0		222500	0.5	1.1	1.1	0.9	0.34641
	223000	1.8	1.8	1.8	1.8	0		223000	1.5	1.5	1.5	1.5	0		223000	12.3	12.3	10.6	11.7333	0.981495		223000	3.3	7	7	5.76667	2.1362
	223500	0.5	0.5	0.5	0.5	0		223500	4.1	4.1	5	4.4	0.519615		223500	8.2	8.2	8.2	8.2	0		223500	7.2	7.2	7.2	7.2	0
	224000	0.5	0.5	0.5	0.5	0		224000	1.9	1.9	1.9	1.9	2.71948e-16		224000	6.7	6.7	3.3	5.56667	1.96299		224000	3.1	5.1	5.1	4.43333	1.1547
	224500	0.5	0.5	0.5	0.5	0		224500	2.5	3.1	3.3	2.96667	0.416333		224500	12.5	12.5	5.3	10.1	4.15692		224500	6.1	8.2	6.5	6.93333	1.11505
	225000	0.7	0.7	1	0.8	0.173205		225000	1.3	1.4	2.6	1.76667	0.723418		225000	14.9	11.5	4.6	10.3333	5.24817		225000	3.7	10.8	10.5	8.33333	4.01539
	225500	0.9	0.9	1.2	1	0.173205		225500	1.1	1.2	1.8	1.36667	0.378594		225500	11.8	11.8	7.1	10.2333	2.71355		225500	1.5	3	2.9	2.46667	0.83865
	226000	5.1	5.8	7.1	6	1.01489		226000	1	1	1.9	1.3	0.519615		226000	13.3	10	3.1	8.8	5.20481		226000	5	6.1	4	5.03333	1.0504
	226500	5	5	5	5	0		226500	3.6	3.6	7.8	5	2.42487		226500	8.7	8.7	4.3	7.23333	2.54034		226500	1.7	1.7	1.7	1.7	0
	227000	1.9	1.9	2.8	2.2	0.519615		227000	1.5	2.5	2.3	2.1	0.52915		227000	3.9	3.4	2.1	3.13333	0.929157		227000	2.6	3.5	2.4	2.83333	0.585947
	227500	0.6	0.6	1.1	0.766667	0.288675		227500	1.1	2.1	1.1	1.43333	0.57735		227500	7.9	5.9	4.9	6.23333	1.52753		227500	2.9	2.9	1.4	2.4	0.866025
	228000	0.6	0.6	1.2	0.8	0.34641		228000	1.3	1.9	1.5	1.56667	0.305505		228000	8.5	5.7	3.5	5.9	2.50599		228000	6	6	4.9	5.63333	0.635085
	228500	2.1	2.1	3.9	2.7	1.03923		228500	2.1	3.8	2.7	2.86667	0.862168		228500	9.7	7.5	4.7	7.3	2.50599		228500	1.6	1.6	1.6	1.6	2.71948e-16
	229000	1.1	1.1	1.1	1.1	0		229000	0.8	1.6	0.8	1.06667	0.46188		229000	11.2	9.8	8.4	9.8	1.4		229000	0.9	0.9	0.9	0.9	0
	229500	0.4	0.4	0.4	0.4	6.7987e-17		229500	0.8	1.2	0.8	0.933333	0.23094		229500	8.5	8.5	5	7.33333	2.02073		229500	1.7	2.9	2.3	2.3	0.6
	230000	0.4	0.4	0.4	0.4	6.7987e-17		230000	1.9	3	2.2	2.36667	0.568624		230000	13.4	12.2	7.7	11.1	3.005		230000	0.8	2.4	2.4	1.86667	0.92376
	230500	0.4	0.4	0.4	0.4	6.7987e-17		230500	3.9	5.2	5.3	4.8	0.781025		230500	13.9	7.7	4.4	8.66667	4.82321		230500	2.8	4.9	4.9	4.2	1.21244
	231000	0.4	0.4	0.4	0.4	6.7987e-17		231000	5.7	7.7	7.7	7.03333	1.1547		231000	15.5	13.8	10	13.1	2.81603		231000	3.9	3.9	3.9	3.9	0
	231500	0.8	1.1	1.4	1.1	0.3		231500	3.3	3.8	4.4	3.83333	0.550757		231500	11.8	10.1	9.9	10.6	1.04403		231500	2.3	8.6	8.6	6.5	3.63731
	232000	0.9	1.2	3.4	1.83333	1.36504		232000	4	6.9	4.5	5.13333	1.55027		232000	11.3	7.5	7.5	8.76667	2.19393		232000	0.8	3.4	3.4	2.53333	1.50111
	232500	2.9	3.3	4.9	3.7	1.0583		232500	13.3	13.3	15.2	13.9333	1.09697		232500	19.5	15.9	14.7	16.7	2.498		232500	0.8	2.5	2.5	1.93333	0.981495
	233000	1.3	1.3	1.3	1.3	0		233000	3.9	3.9	5.2	4.33333	0.750555		233000	11.4	11.4	3.8	8.86667	4.38786		233000	1.2	4.5	4.5	3.4	1.90526
	233500	5.8	5.8	5.8	5.8	0		233500	2.3	2.3	5.2	3.26667	1.67432		233500	12.6	12.6	8.6	11.2667	2.3094		233500	13.1	15.9	15.9	14.9667	1.61658
	234000	4	4	4	4	0		234000	5.5	5.5	9.1	6.7	2.07846		234000	9.7	6.4	2.7	6.26667	3.5019		234000	2.5	2.5	2.5	2.5	0
	234500	0.8	0.8	0.8	0.8	1.35974e-16		234500	5.4	5.4	5.4	5.4	1.08779e-15		234500	15.1	8.8	5.8	9.9	4.74658		234500	2.5	2.5	2.4	2.46667	0.057735
	235000	0.8	0.8	0.8	0.8	1.35974e-16		235000	4.1	4.1	4.5	4.23333	0.23094		235000	12	12	8.5	10.8333	2.02073		235000	2.2	5.6	3.2	3.66667	1.74738
	235500	1.3	1.3	1.3	1.3	0		235500	6.8	6.8	8.1	7.23333	0.750555		235500	14.2	12.5	8.9	11.8667	2.70617		235500	0.4	1.2	0.9	0.833333	0.404145
	236000	5.6	5.6	5.6	5.6	1.08779e-15		236000	4.2	4.2	4.2	4.2	0		236000	9.9	8.5	4.3	7.56667	2.91433		236000	0.4	1.4	1.2	1	0.52915
	236500	4.8	4.8	6	5.2	0.69282		236500	1.6	1.6	1.6	1.6	2.71948e-16		236500	15.6	11.3	9	11.9667	3.35012		236500	0.4	1.5	1.5	1.13333	0.635085
	237000	1.6	1.6	1.6	1.6	2.71948e-16		237000	2.4	2.4	2.4	2.4	0		237000	7.5	7.5	5	6.66667	1.44338		237000	0.4	1.3	1.3	1	0.519615
	237500	0.9	0.9	0.9	0.9	0		237500	3	3	3	3	0		237500	22.2	16.7	11.8	16.9	5.20288		237500	1.5	3.5	2.5	2.5	1
	238000	1.6	1.6	1.6	1.6	2.71948e-16		238000	5	5	5	5	0		238000	9.5	6.8	4.1	6.8	2.7		238000	7	7.5	4.7	6.4	1.49332
	238500	1.3	1.3	1.3	1.3	0		238500	6.8	6.8	7.2	6.93333	0.23094		238500	14.3	14.3	8.5	12.3667	3.34863		238500	1.1	1.2	1.2	1.16667	0.057735
	239000	1.4	1.4	1.4	1.4	2.71948e-16		239000	2.1	2.1	4.2	2.8	1.21244		239000	8.4	8.4	2.6	6.46667	3.34863		239000	0.8	1.8	1.8	1.46667	0.57735
	239500	4.3	4.3	4.3	4.3	0		239500	1.6	2.7	1.9	2.06667	0.568624		239500	15.7	12.2	3.7	10.5333	6.17117		239500	0.6	1.7	1.7	1.33333	0.635085
	240000	1.5	1.5	1.5	1.5	0		240000	0.8	1.6	0.8	1.06667	0.46188		240000	15.8	14.1	12.3	14.0667	1.75024		240000	0.6	1.1	1.1	0.933333	0.288675
	240500	2.6	2.6	3.3	2.83333	0.404145		240500	0.8	1.3	0.8	0.966667	0.288675		240500	19.2	15.7	10.2	15.0333	4.53689		240500	0.9	1.4	1.4	1.23333	0.288675
	241000	0.9	1.1	1.1	1.03333	0.11547		241000	1.7	2.5	2.3	2.16667	0.416333		241000	11.5	10.7	8.9	10.3667	1.33167		241000	1.7	3.3	3.3	2.76667	0.92376
	241500	0.7	0.9	0.9	0.833333	0.11547		241500	2.7	2.7	4.2	3.2	0.866025		241500	6.6	6.6	6.6	6.6	1.08779e-15		241500	0.9	2.8	2.8	2.16667	1.09697
	242000	0.7	0.9	0.9	0.833333	0.11547		242000	2.1	2.1	2.1	2.1	0		242000	9.3	9.3	8.1	8.9	0.69282		242000	0.9	3.6	3.6	2.7	1.55885
	242500	1.2	1.8	3	2	0.916515		242500	2.4	2.4	3.6	2.8	0.69282		242500	17	17	10.2	14.7333	3.92598		242500	1.1	2.2	2.2	1.83333	0.635085
	243000	7.1	7.1	7.6	7.26667	0.288675		243000	4	4	5.6	4.53333	0.92376		243000	10.6	10.6	5.8	9	2.77128		243000	3	3	3	3	0
	243500	6	6	6	6	0		243500	5.3	6.2	10.5	7.33333	2.77909		243500	13.4	11.5	3	9.3	5.53805		243500	7.7	7.7	7.7	7.7	0
	244000	2.9	2.9	2.9	2.9	0		244000	1.7	1.8	5.1	2.86667	1.93477		244000	11.2	9.6	5.5	8.76667	2.93995		244000	8.6	10	7	8.53333	1.50111
	244500	0.8	0.8	0.8	0.8	1.35974e-16		244500	1.5	1.5	2.2	1.73333	0.404145		244500	3.1	3.1	2.9	3.03333	0.11547		244500	8.2	8.2	4.7	7.03333	2.02073
	245000	4.1	4.1	4.1	4.1	0		245000	1.9	2.8	2.8	2.5	0.519615		245000	10.8	8.8	6.8	8.8	2		245000	5.1	5.9	5.2	5.4	0.43589
	245500	5.9	5.9	5.9	5.9	1.08779e-15		245500	10	13.2	11.7	11.6333	1.60104		245500	16.1	16.1	4.9	12.3667	6.46632		245500	1.2	1.3	1.3	1.26667	0.057735
	246000	5.1	5.1	5.1	5.1	0		246000	9.1	9.1	10.4	9.53333	0.750555		246000	14.2	12.4	7.1	11.2333	3.69098		246000	1.6	1.7	1.7	1.66667	0.057735
	246500	5.6	5.6	5.6	5.6	1.08779e-15		246500	1.4	1.4	2.6	1.8	0.69282		246500	19	17.4	14.2	16.8667	2.44404		246500	7.4	7.8	5.5	6.9	1.22882
	247000	5.3	5.3	5.3	5.3	0		247000	0.9	0.9	1.9	1.23333	0.57735		247000	6.7	5.4	5.1	5.73333	0.85049		247000	6.9	8	7	7.3	0.608276
	247500	4.7	4.7	4.7	4.7	0		247500	2	2	3.6	2.53333	0.92376		247500	13.2	11.6	4.1	9.63333	4.85833		247500	1.6	1.7	1.7	1.66667	0.057735
	248000	4.2	4.2	4.2	4.2	0		248000	5.1	9.7	6.3	7.03333	2.38607		248000	11	9.4	4.7	8.36667	3.27465		248000	1.2	2.5	2.5	2.06667	0.750555
	248500	1.3	1.3	1.3	1.3	0		248500	1.3	4.9	1.8	2.66667	1.95021		248500	7.9	7.9	4.8	6.86667	1.78979		248500	4.8	10.1	8.7	7.86667	2.74651
	249000	1.6	1.6	1.6	1.6	2.71948e-16		249000	1.7	3.4	3.9	3	1.15326		249000	16.6	12.1	6.7	11.8	4.95681		249000	3.4	5.1	4.8	4.43333	0.907377
	249500	0.7	0.7	0.7	0.7	1.35974e-16		249500	2.7	2.7	5.4	3.6	1.55885		249500	16.3	9.7	4.4	10.1333	5.96182		249500	1.2	1.3	1.2	1.23333	0.057735
	250000	0.7	0.7	0.7	0.7	1.35974e-16		250000	3	4	4.7	3.9	0.8544		250000	13.2	8	4.5	8.56667	4.37759		250000	3.7	4.7	3.9	4.1	0.52915
	250500	0.7	0.7	0.7	0.7	1.35974e-16		250500	6.2	7.8	8	7.33333	0.986577		250500	18.5	13.5	2.9	11.6333	7.96576		250500	3.1	3.1	3.1	3.1	0
	251000	0.7	0.7	0.7	0.7	1.35974e-16		251000	6.3	6.6	9.6	7.5	1.82483		251000	15.2	10.2	5.8	10.4	4.70319		251000	3	3	2.9	2.96667	0.057735
	251500	0.7	0.7	0.7	0.7	1.35974e-16		251500	7.3	9.1	12.7	9.7	2.74955		251500	5.7	5.7	5.7	5.7	0		251500	5	7.6	4.6	5.73333	1.62891
	252000	1.8	1.8	1.8	1.8	0		252000	4.4	5.7	5.9	5.33333	0.814453		252000	8.9	8.9	8.9	8.9	0		252000	2.1	3.2	3.2	2.83333	0.635085
	252500	5.2	5.2	5.2	5.2	0		252500	2	3	4.5	3.16667	1.25831		252500	13.8	9.7	6.5	10	3.65923		252500	9.1	9.1	9.1	9.1	0
	253000	4.4	4.4	5.2	4.66667	0.46188		253000	3.1	3.1	5.4	3.86667	1.32791		253000	13.7	11	8.2	10.9667	2.75015		253000	5.8	7.8	7.8	7.13333	1.1547
	253500	1.6	1.6	1.6	1.6	2.71948e-16		253500	3.7	3.7	4.9	4.1	0.69282		253500	7.5	7.5	6.4	7.13333	0.635085		253500	2.2	6.6	5.3	4.7	2.26053
	254000	4.1	4.1	4.1	4.1	0		254000	9.2	10.7	9.2	9.7	0.866025		254000	4.9	4.9	3.4	4.4	0.866025		254000	0.9	1.8	1.6	1.43333	0.472582
	254500	1	1	1	1	0		254500	3.5	3.5	5.2	4.06667	0.981495		254500	9.8	9.8	4.9	8.16667	2.82902		254500	1.6	3.7	3.7	3	1.21244
	255000	1	1	1	1	0		255000	4	4	7.2	5.06667	1.84752		255000	18.7	15.6	9.1	14.4667	4.89932		255000	0.8	1.8	1.8	1.46667	0.57735
	255500	1	1	1	1	0		255500	9.2	9.2	12.3	10.2333	1.78979		255500	9	7.5	4.7	7.06667	2.18251		255500	0.8	1.5	1.5	1.26667	0.404145
	256000	3.7	3.7	3.7	3.7	5.43896e-16		256000	8.8	8.8	10.8	9.46667	1.1547		256000	11.6	10.1	6.5	9.4	2.62107		256000	1	3	3	2.33333	1.1547
	256500	1.6	1.6	1.6	1.6	2.71948e-16		256500	4	5.6	4.8	4.8	0.8		256500	19.7	17.7	7.6	15	6.48614		256500	4.1	8.8	6.3	6.4	2.3516
	257000	0.8	0.8	0.8	0.8	1.35974e-16		257000	1.4	1.4	1.4	1.4	2.71948e-16		257000	9.3	9.3	6.5	8.36667	1.61658		257000	2.3	3.7	3.5	3.16667	0.757188
	257500	1.7	1.7	1.7	1.7	0		257500	2.2	2.2	2.8	2.4	0.34641		257500	8.6	8.6	3.5	6.9	2.94449		257500	1.4	2.4	1.8	1.86667	0.503322
	258000	1.8	1.8	1.8	1.8	0		258000	2.9	2.9	4.3	3.36667	0.80829		258000	7.6	7.6	4.4	6.53333	1.84752		258000	0.7	1.1	1.1	0.966667	0.23094
	258500	0.9	0.9	0.9	0.9	0		258500	3.8	3.8	3.8	3.8	5.43896e-16		258500	18.6	13.9	7.9	13.4667	5.36315		258500	0.7	1.6	1.6	1.3	0.519615
	259000	1.7	1.7	1.7	1.7	0		259000	2.9	2.9	2.9	2.9	0		259000	12.2	12	7.9	10.7	2.42693		259000	1.5	2.9	2.9	2.43333	0.80829
	259500	8.3	8.3	8.3	8.3	0		259500	2.4	2.4	2.4	2.4	0		259500	10.6	10.1	8.4	9.7	1.15326		259500	0.9	3.8	3.8	2.83333	1.67432
	260000	7.4	7.4	9.9	8.23333	1.44338		260000	3.5	3.5	4.6	3.86667	0.635085		260000	13.9	8.7	6	9.53333	4.01539		260000	0.4	4.6	4.6	3.2	2.42487
	260500	7.7	7.7	7.8	7.73333	0.057735		260500	3.2	3.2	3.3	3.23333	0.057735		260500	16.2	13.4	3.4	11	6.72904		260500	0.4	4.8	4.8	3.33333	2.54034
	261000	5.3	6.6	6.6	6.16667	0.750555		261000	4.3	5.4	4.3	4.66667	0.635085		261000	13.1	13.1	5.2	10.4667	4.56107		261000	0.4	1.9	1.9	1.4	0.866025
	261500	2.3	3.6	3.6	3.16667	0.750555		261500	1.7	1.7	1.7	1.7	0		261500	6.1	6.1	4.5	5.56667	0.92376		261500	0.4	1.5	1.5	1.13333	0.635085
	262000	1	1.5	1.5	1.33333	0.288675		262000	1.3	1.3	1.3	1.3	0		262000	13.2	11.5	9.6	11.4333	1.80093		262000	0.4	1.9	1.9	1.4	0.866025
	262500	0.7	0.7	0.7	0.7	1.35974e-16		262500	2.3	2.3	3.1	2.56667	0.46188		262500	34.2	22.8	13.3	23.4333	10.4644		262500	1.3	5.5	5.5	4.1	2.42487
	263000	0.7	0.7	0.7	0.7	1.35974e-16		263000	2.7	2.7	4	3.13333	0.750555		263000	18.2	11.2	5.6	11.6667	6.31295		263000	1.4	1.4	1.4	1.4	2.71948e-16
	263500	5.2	5.2	5.2	5.2	0		263500	1.9	1.9	3	2.26667	0.635085		263500	5.4	4	1.2	3.53333	2.13854		263500	1	1	1	1	0
	264000	9.1	9.1	9.1	9.1	0		264000	6.5	6.5	6.5	6.5	0		264000	5	1.7	0.7	2.46667	2.25019		264000	1.3	1.3	1.3	1.3	0
	264500	2	2	2	2	0		264500	1.6	3.2	1.8	2.2	0.87178		264500	2.7	2.2	0.7	1.86667	1.04083		264500	1.2	1.6	1.6	1.46667	0.23094
	265000	0.7	0.7	0.7	0.7	1.35974e-16		265000	0.8	1.7	1.7	1.4	0.519615		265000	15.6	9	2.9	9.16667	6.35164		265000	0.8	1.8	1.8	1.46667	0.57735
	265500	0.7	0.7	0.7	0.7	1.35974e-16		265500	1.2	1.6	2.5	1.76667	0.665833		265500	6.1	3.1	1.5	3.56667	2.33524		265500	0.8	3.6	3.6	2.66667	1.61658
	266000	1	1	1	1	0		266000	1.1	1.1	1.4	1.2	0.173205		266000	23.5	21.6	6.6	17.2333	9.25761		266000	0.8	2	2	1.6	0.69282
	266500	5.1	5.1	5.1	5.1	0		266500	1.4	1.4	2.2	1.66667	0.46188		266500	15.1	10.1	4.1	9.76667	5.50757		266500	3.1	5.7	5.7	4.83333	1.50111
	267000	3.5	3.5	3.5	3.5	0		267000	1.7	1.7	3.2	2.2	0.866025		267000	10.8	9.6	7.9	9.43333	1.45717		267000	3.2	6.1	4.6	4.63333	1.45029
	267500	3.5	3.5	3.5	3.5	0		267500	1.4	1.4	3.5	2.1	1.21244		267500	20.2	14.7	9.2	14.7	5.5		267500	0.9	1.7	1.7	1.43333	0.46188
	268000	1.2	1.2	1.2	1.2	0		268000	1.7	1.7	4	2.46667	1.32791		268000	9.9	9.3	6	8.4	2.1		268000	2.9	9.3	8.3	6.83333	3.44287
	268500	5.8	5.8	5.8	5.8	0		268500	2	2	3.4	2.46667	0.80829		268500	15.5	11.5	4.8	10.6	5.40648		268500	0.7	3.5	3.5	2.56667	1.61658
	269000	8.3	8.3	8.3	8.3	0		269000	2.2	2.2	2.4	2.26667	0.11547		269000	10.1	5.8	3.2	6.36667	3.48473		269000	0.7	2.1	2.1	1.63333	0.80829
	269500	8.6	8.6	8.6	8.6	0		269500	2.6	2.6	4.3	3.16667	0.981495		269500	9.4	7.8	3.1	6.76667	3.27465		269500	1.2	2.4	1.8	1.8	0.6
	270000	5.3	5.3	5.3	5.3	0		270000	2	2	4.8	2.93333	1.61658		270000	8.4	7	5.6	7	1.4		270000	0.9	0.9	0.8	0.866667	0.057735
	270500	2.8	2.8	2.8	2.8	5.43896e-16		270500	2.1	3.1	4.1	3.1	1		270500	17.5	14.3	8	13.2667	4.83356		270500	2.5	2.5	1.7	2.23333	0.46188
	271000	1.6	1.6	1.6	1.6	2.71948e-16		271000	7.2	8.4	11.2	8.93333	2.05264		271000	13.4	8.4	7	9.6	3.36452		271000	0.9	5.1	5.1	3.7	2.42487
	271500	3	3	3	3	0		271500	2.8	4.2	2.8	3.26667	0.80829		271500	18.2	16.6	13.1	15.9667	2.60832		271500	0.2	2.4	2.4	1.66667	1.27017
	272000	0.7	0.7	0.7	0.7	1.35974e-16		272000	1.6	2.5	2.7	2.26667	0.585947		272000	5.8	5.8	5.8	5.8	0		272000	0.2	1.3	1.3	0.933333	0.635085
	272500	0.7	0.7	0.7	0.7	1.35974e-16		272500	2.2	2.2	4.3	2.9	1.21244		272500	10.5	7.3	6.1	7.96667	2.2745		272500	0.2	0.7	0.7	0.533333	0.288675
	273000	2.4	2.4	2.4	2.4	0		273000	1.8	1.8	1.8	1.8	0		273000	16.3	8.2	5.8	10.1	5.50182		273000	0.2	0.8	0.8	0.6	0.34641
	273500	1.7	3.5	3.5	2.9	1.03923		273500	2.9	2.9	3.9	3.23333	0.57735		273500	13.6	10.4	4.4	9.46667	4.67047		273500	0.2	1	1	0.733333	0.46188
	274000	0.5	1.4	1.4	1.1	0.519615		274000	3.5	3.5	3.7	3.56667	0.11547		274000	11.6	5.2	3.9	6.9	4.12189		274000	0.2	1	1	0.733333	0.46188
	274500	0.5	1	1	0.833333	0.288675		274500	10.5	10.5	11.6	10.8667	0.635085		274500	6	3.6	2.7	4.1	1.70587		274500	0.2	2.2	2.2	1.53333	1.1547
	275000	0.5	0.8	0.8	0.7	0.173205		275000	1.9	1.9	5	2.93333	1.78979		275000	13.7	13.7	5.9	11.1	4.50333		275000	0.7	6.3	6.3	4.43333	3.23316
	275500	0.9	1.4	1.4	1.23333	0.288675		275500	1	1	4	2	1.73205		275500	13.5	12.2	7.1	10.9333	3.3828		275500	5.8	6.1	4.9	5.6	0.6245
	276000	1.7	1.7	2.5	1.96667	0.46188		276000	3.4	3.4	8.1	4.96667	2.71355		276000	7.4	6.9	6.7	7	0.360555		276000	1.1	2	2	1.7	0.519615
	276500	0.9	0.9	1	0.933333	0.057735		276500	7.3	7.3	7.3	7.3	0		276500	6.9	5.1	3.4	5.13333	1.75024		276500	0.8	2	1.4	1.4	0.6
	277000	1.3	1.3	1.4	1.33333	0.057735		277000	3.9	4.1	4.9	4.3	0.52915		277000	8.5	8.5	7.1	8.03333	0.80829		277000	1.7	2.5	0.8	1.66667	0.85049
	277500	1.3	1.6	1.6	1.5	0.173205		277500	3.7	4.4	2.2	3.43333	1.12398		277500	13.4	13.4	10.8	12.5333	1.50111		277500	2	3	1.6	2.2	0.72111
	278000	1	2	2	1.66667	0.57735		278000	1.4	1.5	0.7	1.2	0.43589		278000	5.4	3.6	3.6	4.2	1.03923		278000	4.7	5.5	4.4	4.86667	0.568624
	278500	1.3	2.5	2.5	2.1	0.69282		278500	1	1.1	0.7	0.933333	0.208167		278500	6.5	6.1	4.1	5.56667	1.28582		278500	1.7	1.7	1.6	1.66667	0.057735
	279000	7.9	7.9	7.9	7.9	1.08779e-15		279000	2.4	3.2	2.3	2.63333	0.493288		279000	9.3	9.3	5.6	8.06667	2.1362		279000	1.3	1.3	1.3	1.3	0
	279500	2.4	2.4	2.4	2.4	0		279500	2.7	3.6	5.6	3.96667	1.48436		279500	18.8	17.2	8	14.6667	5.82866		279500	1.6	2.5	1.9	2	0.458258
	280000	1.5	1.5	1.5	1.5	0		280000	1.3	1.4	2.5	1.73333	0.665833		280000	8.1	8.1	7.6	7.93333	0.288675		280000	0.9	2	1.6	1.5	0.556776
	280500	6.3	6.3	6.3	6.3	0		280500	1.7	1.8	2.7	2.06667	0.550757		280500	10.3	9	7.7	9	1.3		280500	3.4	9.4	4.7	5.83333	3.15647
	281000	1.1	1.1	1.1	1.1	0		281000	1.3	1.3	2.5	1.7	0.69282		281000	7.6	7.6	6.8	7.33333	0.46188		281000	2.3	6.2	5.1	4.53333	2.0108
	281500	0.6	0.6	0.6	0.6	0		281500	2.6	2.6	4.5	3.23333	1.09697		281500	9.8	9.8	8.1	9.23333	0.981495		281500	0.6	1.2	1.2	1	0.34641
	282000	0.6	0.6	0.6	0.6	0		282000	3.6	3.6	3.6	3.6	0		282000	4.6	4.6	3.5	4.23333	0.635085		282000	0.6	0.9	0.9	0.8	0.173205
	282500	3.1	3.1	3.1	3.1	0		282500	3.1	3.1	3.1	3.1	0		282500	18.9	12	4.3	11.7333	7.30365		282500	0.6	0.9	0.9	0.8	0.173205
	283000	1.4	1.4	1.4	1.4	2.71948e-16		283000	2.7	2.7	3.6	3	0.519615		283000	12.8	8.5	7.1	9.46667	2.97041		283000	0.8	1	0.8	0.866667	0.11547
	283500	0.6	0.6	0.6	0.6	0		283500	2.1	3.1	3.1	2.76667	0.57735		283500	5.7	3.5	2.4	3.86667	1.68028		283500	1.1	1.1	0.8	1	0.173205
	284000	0.6	0.6	0.6	0.6	0		284000	8.6	9.1	12.7	10.1333	2.23681		284000	14.6	11	5	10.2	4.84974		284000	1.4	2.1	1.3	1.6	0.43589
	284500	0.6	0.6	0.6	0.6	0		284500	9.6	16	10.9	12.1667	3.3828		284500	20.7	17.2	8.6	15.5	6.22656		284500	3.1	6.6	4.7	4.8	1.75214
	285000	4.3	4.3	4.3	4.3	0		285000	2	3.2	3.4	2.86667	0.757188		285000	8.9	7.1	5.3	7.1	1.8		285000	1.1	3.5	3.5	2.7	1.38564
	285500	4.6	4.6	4.6	4.6	0		285500	2.6	2.6	2.6	2.6	0		285500	15.7	8.6	5.4	9.9	5.27162		285500	5.1	12.5	11.2	9.6	3.95095
	286000	1.9	1.9	1.9	1.9	2.71948e-16		286000	3.4	3.4	5.1	3.96667	0.981495		286000	15.4	15.4	13.5	14.7667	1.09697		286000	4.3	7	5.3	5.53333	1.36504
	286500	1.6	1.6	1.6	1.6	2.71948e-16		286500	2.7	3.5	4.9	3.7	1.11355		286500	9.5	9.5	6.3	8.43333	1.84752		286500	3.3	6.9	6.9	5.7	2.07846
	287000	0.6	0.6	0.6	0.6	0		287000	2	2.9	2.9	2.6	0.519615		287000	9.1	9.1	7.7	8.63333	0.80829		287000	6.8	8.5	6.8	7.36667	0.981495
	287500	0.6	0.6	0.6	0.6	0		287500	1.2	1.2	1.2	1.2	0		287500	6.8	6.8	5.4	6.33333	0.80829		287500	3.9	3.9	3.9	3.9	0
	288000	0.6	0.6	0.6	0.6	0		288000	2.7	2.7	4.2	3.2	0.866025		288000	13.4	11.5	5.8	10.2333	3.95517		288000	1	1	1	1	0
	288500	0.9	0.9	0.9	0.9	0		288500	4.6	4.6	5.7	4.96667	0.635085		288500	15.4	11.7	5.1	10.7333	5.2176		288500	0.9	3.1	3.1	2.36667	1.27017
	289000	1.8	1.8	1.8	1.8	0		289000	2.7	2.7	4.1	3.16667	0.80829		289000	18.8	16.9	12.3	16	3.34215		289000	0.8	3.5	3.5	2.6	1.55885
	289500	8.7	8.7	8.7	8.7	0		289500	9.8	9.8	12.8	10.8	1.73205		289500	14.7	11.9	7.4	11.3333	3.68284		289500	1	4.1	4.1	3.06667	1.78979
	290000	6.9	6.9	6.9	6.9	1.08779e-15		290000	3.5	4.1	3.5	3.7	0.34641		290000	10.8	7.2	2.7	6.9	4.05832		290000	1.2	2.4	1.2	1.6	0.69282
	290500	5.4	5.4	5.4	5.4	1.08779e-15		290500	1.1	2.1	1.1	1.43333	0.57735		290500	7.9	7.9	1.9	5.9	3.4641		290500	0.7	1.4	0.7	0.933333	0.404145
	291000	3.7	3.7	3.7	3.7	5.43896e-16		291000	4.5	12.6	5.2	7.43333	4.48813		291000	5.4	5.4	3.1	4.63333	1.32791		291000	0.5	1.2	0.7	0.8	0.360555
	291500	2.6	2.6	2.6	2.6	0		291500	5.3	5.3	6.6	5.73333	0.750555		291500	10.4	8.6	6.9	8.63333	1.75024		291500	0.5	1.2	0.9	0.866667	0.351188
	292000	0.6	0.6	0.6	0.6	0		292000	5.2	5.2	5.2	5.2	0		292000	15.7	13.7	3.1	10.8333	6.77151		292000	0.5	1.8	1.8	1.36667	0.750555
	292500	0.6	0.6	0.6	0.6	0		292500	9.3	9.3	10.6	9.73333	0.750555		292500	14.7	11.1	3	9.6	5.9925		292500	0.5	5.4	5.4	3.76667	2.82902
	293000	0.9	0.9	0.9	0.9	0		293000	7.1	10.7	7.1	8.3	2.07846		293000	16.4	14.6	6.3	12.4333	5.38733		293000	1.4	5.7	4.2	3.76667	2.18251
	293500	1.7	1.7	1.7	1.7	0		293500	3.9	5.4	3.9	4.4	0.866025		293500	9.6	9.6	7.7	8.96667	1.09697		293500	6.3	7.1	4.7	6.03333	1.22202
	294000	4.3	4.3	4.3	4.3	0		294000	6.1	6.1	7.3	6.5	0.69282		294000	8.9	7.3	4	6.73333	2.49867		294000	8.2	8.2	5.4	7.26667	1.61658
	294500	2.2	2.2	2.2	2.2	0		294500	7.4	7.4	11.6	8.8	2.42487		294500	7	4.7	1.4	4.36667	2.81484		294500	7.1	8.7	4.4	6.73333	2.17332
	295000	3.4	3.4	3.4	3.4	0		295000	3.4	3.4	6.7	4.5	1.90526		295000	10.6	8.1	2.3	7	4.25793		295000	2.5	6	4.5	4.33333	1.75594
	295500	0.7	0.7	0.7	0.7	1.35974e-16		295500	2	2.1	3	2.36667	0.550757		295500	13.6	9.2	3.5	8.76667	5.06392		295500	3.2	4.3	4.1	3.86667	0.585947
	296000	0.7	0.7	0.7	0.7	1.35974e-16		296000	3.9	5.5	7.5	5.63333	1.8037		296000	10.6	6	4.1	6.9	3.34215		296000	2.9	3.6	2.9	3.13333	0.404145
	296500	0.9	1	1	0.966667	0.057735		296500	1.6	1.8	3.5	2.3	1.04403		296500	13.2	12.5	7.4	11.0333	3.16596		296500	0.8	0.9	0.9	0.866667	0.057735
	297000	1.5	3	3	2.5	0.866025		297000	1.3	1.3	2.6	1.73333	0.750555		297000	12.7	12.7	5.1	10.1667	4.38786		297000	1.7	2.9	2.3	2.3	0.6
	297500	3.2	4.8	4.8	4.26667	0.92376		297500	1.5	1.5	2.2	1.73333	0.404145		297500	19.7	13.1	7.7	13.5	6.00999		297500	0.6	3.4	3.4	2.46667	1.61658
	298000	3.8	3.8	3.8	3.8	5.43896e-16		298000	6.2	6.2	6.2	6.2	0		298000	14.9	10.8	6.1	10.6	4.40341		298000	0.6	2	2	1.53333	0.80829
	298500	4.4	4.4	4.4	4.4	0		298500	5.4	5.4	5.4	5.4	1.08779e-15		298500	13.3	10	5.2	9.5	4.07308		298500	1.9	3	3	2.63333	0.635085
	299000	0.9	0.9	0.9	0.9	0		299000	2.5	2.5	2.9	2.63333	0.23094		299000	10.8	7.7	5.9	8.13333	2.47857		299000	16.9	16.9	16.9	16.9	0
	299500	1.9	1.9	1.9	1.9	2.71948e-16		299500	0.6	0.6	0.6	0.6	0		299500	12.5	11	10.2	11.2333	1.16762		299500	4.6	11.1	9.5	8.4	3.38674
	300000	1.3	1.3	1.3	1.3	0		300000	0.6	0.6	0.6	0.6	0		300000	8.4	5.6	3	5.66667	2.70062		300000	3.1	5	2.4	3.5	1.34536
	300500	2.1	2.1	4.3	2.83333	1.27017		300500	0.6	0.6	0.6	0.6	0		300500	6.1	6	2.4	4.83333	2.10792		300500	8.6	11.5	6.2	8.76667	2.65393
	301000	0.5	0.5	1	0.666667	0.288675		301000	1.3	1.3	1.3	1.3	0		301000	18.1	12.7	10.9	13.9	3.747		301000	3.5	4.9	4.9	4.43333	0.80829
	301500	0.5	0.5	0.7	0.566667	0.11547		301500	5.9	5.9	5.9	5.9	1.08779e-15		301500	8.6	6.4	5.7	6.9	1.51327		301500	1.9	6	5	4.3	2.13776
	302000	0.5	0.5	0.7	0.566667	0.11547		302000	3.7	5.5	6.1	5.1	1.249		302000	13.4	10	2	8.46667	5.85263		302000	0.7	2.8	2.8	2.1	1.21244
	302500	0.6	0.6	0.7	0.633333	0.057735		302500	1	1.5	2.1	1.53333	0.550757		302500	8.8	7	1.9	5.9	3.57911		302500	0.7	1.3	1.3	1.1	0.34641
	303000	0.7	0.7	0.7	0.7	1.35974e-16		303000	2.4	3	3.6	3	0.6		303000	16.9	13.8	4.6	11.7667	6.39713		303000	3.6	6.6	4.9	5.03333	1.50444
	303500	0.7	0.7	0.7	0.7	1.35974e-16		303500	2	2	2	2	0		303500	7.3	7.1	4.4	6.26667	1.61967		303500	1.5	11.1	9.3	7.3	5.10294
	304000	2.2	2.2	2.2	2.2	0		304000	2.1	2.1	3.4	2.53333	0.750555		304000	19.4	15.5	7.8	14.2333	5.90282		304000	0.4	3.3	3.3	2.33333	1.67432
	304500	9.5	9.5	9.5	9.5	0		304500	2.4	2.4	5.3	3.36667	1.67432		304500	14.3	13.6	8.1	12	3.39559		304500	0.4	1.4	1.4	1.06667	0.57735
	305000	9	9	9	9	0		305000	1.7	2.1	1.8	1.86667	0.208167		305000	21	19.3	8.3	16.2	6.8942		305000	0.4	1.4	1.4	1.06667	0.57735
	305500	2.9	2.9	2.9	2.9	0		305500	1.9	2.9	2.9	2.56667	0.57735		305500	14.5	7.2	5.3	9	4.85695		305500	0.4	2.6	2.6	1.86667	1.27017
	306000	2.4	2.4	2.4	2.4	0		306000	2.1	2.1	4.2	2.8	1.21244		306000	13.6	13.6	8.5	11.9	2.94449		306000	2.3	10.9	7.8	7	4.35546
	306500	5.8	5.8	5.8	5.8	0		306500	3.3	3.3	5.7	4.1	1.38564		306500	13	13	9.3	11.7667	2.1362		306500	6	7.5	7.5	7	0.866025
	307000	1.7	1.7	1.7	1.7	0		307000	3.5	3.5	3.5	3.5	0		307000	12.7	7.9	6.2	8.93333	3.37095		307000	4	4.6	4.6	4.4	0.34641
	307500	0.9	0.9	0.9	0.9	0		307500	8.7	8.7	8.7	8.7	0		307500	22.5	15.5	6.9	14.9667	7.81366		307500	1.3	1.7	1.7	1.56667	0.23094
	308000	4.1	4.1	4.1	4.1	0		308000	2.4	2.4	4	2.93333	0.92376		308000	19.4	15.8	10.6	15.2667	4.42418		308000	3	5.5	5.5	4.66667	1.44338
	308500	1.5	1.5	1.5	1.5	0		308500	1	1	2.4	1.46667	0.80829		308500	7.4	7.2	6.9	7.16667	0.251661		308500	1.6	3.9	3.9	3.13333	1.32791
	309000	0.8	0.8	0.8	0.8	1.35974e-16		309000	4.3	4.3	10.4	6.33333	3.52184		309000	13	10.3	7.4	10.2333	2.8006		309000	1	2.7	2.7	2.13333	0.981495
	309500	2.6	2.6	2.6	2.6	0		309500	6.4	7.6	8.9	7.63333	1.25033		309500	11.5	7.7	5.3	8.16667	3.12623		309500	0.7	1.8	1.8	1.43333	0.635085
	310000	0.8	0.8	0.8	0.8	1.35974e-16		310000	10.1	12.8	12.8	11.9	1.55885		310000	12.1	10	8.6	10.2333	1.76163		310000	0.7	1.9	1.9	1.5	0.69282
	310500	0.8	0.8	0.8	0.8	1.35974e-16		310500	3	3	4.5	3.5	0.866025		310500	12.8	11.5	10.3	11.5333	1.25033		310500	3.8	6	6	5.26667	1.27017
	311000	3.9	3.9	3.9	3.9	0		311000	3.5	3.5	4.7	3.9	0.69282		311000	12.1	8.5	4.8	8.46667	3.65011		311000	3.9	3.9	3.9	3.9	0
	311500	4.6	4.6	4.6	4.6	0		311500	10	10	11.6	10.5333	0.92376		311500	6	5.7	3.9	5.2	1.13578		311500	7.6	9.5	9.5	8.86667	1.09697
	312000	1.1	1.1	1.1	1.1	0		312000	6.7	10.1	10.1	8.96667	1.96299		312000	14.3	14.3	7.4	12	3.98372		312000	2	2.2	2.2	2.13333	0.11547
	312500	2.5	2.5	2.5	2.5	0		312500	1.6	4	3.1	2.9	1.21244		312500	15.6	12.1	5.7	11.1333	5.02029		312500	1.8	2.4	1.9	2.03333	0.321455
	313000	0.9	0.9	0.9	0.9	0		313000	3	4.4	3.7	3.7	0.7		313000	16.7	15	6.9	12.8667	5.23673		313000	0.7	0.9	0.9	0.833333	0.11547
	313500	0.9	0.9	0.9	0.9	0		313500	3.5	3.5	4.7	3.9	0.69282		313500	9.5	6	2.4	5.96667	3.55012		313500	0.7	0.9	0.9	0.833333	0.11547
	314000	1.4	1.4	1.4	1.4	2.71948e-16		314000	1.2	1.2	1.7	1.36667	0.288675		314000	6.3	5.2	5.2	5.56667	0.635085		314000	3.4	4.5	3.4	3.76667	0.635085
	314500	1.6	1.6	1.6	1.6	2.71948e-16		314500	1	1	1.1	1.03333	0.057735		314500	6.3	6.3	4.8	5.8	0.866025		314500	0.9	4.9	4.9	3.56667	2.3094
	315000	6.3	6.3	6.3	6.3	0		315000	1.2	1.2	2.2	1.53333	0.57735		315000	12.5	9.7	2.5	8.23333	5.15881		315000	0.6	5.3	5.3	3.73333	2.71355
	315500	1.2	1.2	2.6	1.66667	0.80829		315500	1.4	1.4	2.9	1.9	0.866025		315500	14.4	14.1	3.3	10.6	6.32376		315500	0.6	2.6	2.6	1.93333	1.1547
	316000	0.7	0.7	1.3	0.9	0.34641		316000	1.7	1.8	2.1	1.86667	0.208167		316000	11.4	9.5	4.7	8.53333	3.45302		316000	0.6	1.9	1.9	1.46667	0.750555
	316500	0.7	0.7	1.2	0.866667	0.288675		316500	1.6	3.2	1.6	2.13333	0.92376		316500	16.5	11.5	6.8	11.6	4.85077		316500	1.6	3.7	3.7	3	1.21244
	317000	1	1	2.1	1.36667	0.635085		317000	1.4	3.2	1.4	2	1.03923		317000	14.3	11.1	4.8	10.0667	4.83356		317000	0.8	2.9	2.9	2.2	1.21244
	317500	1.3	1.3	1.6	1.4	0.173205		317500	3.3	4.4	3.3	3.66667	0.635085		317500	3.2	3.2	1.5	2.63333	0.981495		317500	0.8	2.5	2.5	1.93333	0.981495
	318000	1.1	1.1	1.1	1.1	0		318000	7.4	8.9	8.9	8.4	0.866025		318000	9.8	9.8	2	7.2	4.50333		318000	4.3	8.3	8.3	6.96667	2.3094
	318500	1.4	1.4	1.4	1.4	2.71948e-16		318500	1.4	4.2	1.7	2.43333	1.53731		318500	19	13.3	7.6	13.3	5.7		318500	5.5	7.4	6.2	6.36667	0.960902
	319000	1.6	1.6	2	1.73333	0.23094		319000	1	2.1	1	1.36667	0.635085		319000	11.3	7.1	5.6	8	2.95466		319000	4.2	7.4	7.4	6.33333	1.84752
	319500	1.1	1.1	1.6	1.26667	0.288675		319500	2.9	5	2.9	3.6	1.21244		319500	12.3	9.1	7.6	9.66667	2.40069		319500	2.4	2.7	2.7	2.6	0.173205
	320000	0.9	0.9	0.9	0.9	0		320000	2.7	2.7	5	3.46667	1.32791		320000	8.2	8.2	5.6	7.33333	1.50111		320000	8.3	8.3	8.3	8.3	0
	320500	2.4	2.4	2.4	2.4	0		320500	0.9	0.9	2.8	1.53333	1.09697		320500	13.5	13.5	6.6	11.2	3.98372		320500	2.6	2.6	2.6	2.6	0
	321000	11.2	11.2	11.2	11.2	2.17558e-15		321000	2.5	2.5	4.8	3.26667	1.32791		321000	10.4	7.4	3	6.93333	3.72201		321000	1.8	1.8	1.8	1.8	0
	321500	12.5	12.5	12.5	12.5	0		321500	2.7	2.7	2.7	2.7	5.43896e-16		321500	3.5	3.5	3.5	3.5	0		321500	1.4	1.7	1.7	1.6	0.173205
	322000	2.7	2.7	2.7	2.7	5.43896e-16		322000	1.8	1.8	1.8	1.8	0		322000	12.6	12.6	5.8	10.3333	3.92598		322000	1	2.1	1.9	1.66667	0.585947
	322500	1.5	1.5	1.5	1.5	0		322500	1.4	2.2	2	1.86667	0.416333		322500	10.9	9.1	4.8	8.26667	3.13422		322500	2.2	4.1	3.2	3.16667	0.950438
	323000	2.5	2.5	2.5	2.5	0		323000	1.2	1.2	2.4	1.6	0.69282		323000	18.5	18.5	10.8	15.9333	4.4456		323000	1.3	1.3	1.2	1.26667	0.057735
	323500	3.5	3.5	4.1	3.7	0.34641		323500	1.8	1.8	2.5	2.03333	0.404145		323500	5.4	4.8	2.8	4.33333	1.36137		323500	1.2	1.7	1.1	1.33333	0.321455
	324000	1	1	1	1	0		324000	2.9	2.9	2.9	2.9	0		324000	10.3	8	5.5	7.93333	2.40069		324000	0.6	1.4	1.4	1.13333	0.46188
	324500	2.1	2.1	2.1	2.1	0		324500	3.9	3.9	3.9	3.9	0		324500	14.2	12.4	8.9	11.8333	2.69506		324500	0.6	3.1	3.1	2.26667	1.44338
	325000	3.8	3.8	3.8	3.8	5.43896e-16		325000	4.1	4.1	4.9	4.36667	0.46188		325000	6.2	5.5	3.3	5	1.51327		325000	0.8	3	3	2.26667	1.27017
	325500	1.4	1.4	1.4	1.4	2.71948e-16		325500	2.4	2.4	2.6	2.46667	0.11547		325500	6.9	5.2	2.6	4.9	2.16564		325500	2.2	5.2	5.2	4.2	1.73205
	326000	1.1	1.1	1.1	1.1	0		326000	2.5	2.5	3	2.66667	0.288675		326000	9.1	9.1	5.3	7.83333	2.19393		326000	2.2	5.1	5.1	4.13333	1.67432
	326500	0.9	0.9	0.9	0.9	0		326500	1.8	2.3	2.6	2.23333	0.404145		326500	16.8	10.8	6	11.2	5.4111		326500	0.8	1.8	1.8	1.46667	0.57735
	327000	1.6	1.6	1.6	1.6	2.71948e-16		327000	5.2	6.5	5.2	5.63333	0.750555		327000	7.1	5.3	5.2	5.86667	1.06927		327000	2.2	5.5	5.5	4.4	1.90526
	327500	3.6	3.6	3.6	3.6	0		327500	5.3	6.1	6.1	5.83333	0.46188		327500	11.2	7.4	5.9	8.16667	2.73191		327500	1.1	1.3	1.3	1.23333	0.11547
	328000	2	2	2	2	0		328000	1.1	1.1	1.1	1.1	0		328000	8.6	5	5	6.2	2.07846		328000	1.3	2.8	2.8	2.3	0.866025
	328500	0.7	0.7	0.7	0.7	1.35974e-16		328500	1.5	1.5	1.5	1.5	0		328500	9.6	9.6	6.1	8.43333	2.02073		328500	2.7	6.7	5.4	4.93333	2.04042
	329000	1.1	1.1	1.1	1.1	0		329000	3.3	3.3	4.4	3.66667	0.635085		329000	8.3	5.1	3.6	5.66667	2.40069		329000	3.7	5.1	3.1	3.96667	1.02632
	329500	3.3	3.3	3.3	3.3	5.43896e-16		329500	3.8	3.8	3.8	3.8	5.43896e-16		329500	17.3	12.7	8	12.6667	4.65009		329500	0.7	1.1	1	0.933333	0.208167
	330000	4.8	4.8	5.6	5.06667	0.46188		330000	1.3	1.3	1.3	1.3	0		330000	14.6	13.1	8.7	12.1333	3.06649		330000	0.7	2.2	2	1.63333	0.814453
	330500	1.1	1.1	1.1	1.1	0		330500	1.5	1.6	2.4	1.83333	0.493288		330500	11.9	10.2	6.7	9.6	2.65141		330500	1.1	3.6	2.4	2.36667	1.25033
	331000	1.4	1.4	1.4	1.4	2.71948e-16		331000	0.9	0.9	1.7	1.16667	0.46188		331000	13.5	10.2	7.8	10.5	2.86182		331000	1.8	1.9	1.9	1.86667	0.057735
	331500	6.5	6.5	6.5	6.5	0		331500	2	2.6	2.9	2.5	0.458258		331500	11.7	10	8.4	10.0333	1.65025		331500	6.7	6.7	5.5	6.3	0.69282
	332000	9.9	9.9	9.9	9.9	0		332000	8.8	8.8	8.8	8.8	0		332000	13	11.2	6.8	10.3333	3.18957		332000	2.3	3.2	3.2	2.9	0.519615
	332500	5.3	5.3	5.3	5.3	0		332500	4.2	4.2	4.2	4.2	0		332500	9.7	8.4	4.7	7.6	2.59422		332500	1.2	2.4	2.4	2	0.69282
	333000	2.3	2.3	2.3	2.3	0		333000	2.4	2.4	2.4	2.4	0		333000	15	15	4	11.3333	6.35085		333000	1.1	2.3	2.3	1.9	0.69282
	333500	5	5	5	5	0		333500	1.5	1.5	1.5	1.5	0		333500	18.7	13.1	3.7	11.8333	7.5798		333500	2.7	4.9	4.9	4.16667	1.27017
	334000	10.4	10.4	10.4	10.4	0		334000	2.4	2.4	2.5	2.43333	0.057735		334000	13	10.5	7.8	10.4333	2.60064		334000	0.6	1.1	1.1	0.933333	0.288675
	334500	11	11	11	11	0		334500	1.6	1.6	4.7	2.63333	1.78979		334500	13	13	9.9	11.9667	1.78979		334500	0.6	1.4	1.4	1.13333	0.46188
	335000	1.7	1.7	1.7	1.7	0		335000	1	1	2.6	1.53333	0.92376		335000	12.8	10.5	6.2	9.83333	3.35012		335000	1.3	3.8	3.8	2.96667	1.44338
	335500	0.6	0.6	0.6	0.6	0		335500	1.4	1.4	5.7	2.83333	2.48261		335500	6.4	4.8	3.2	4.8	1.6		335500	1.4	2.8	2.8	2.33333	0.80829
	336000	0.6	0.6	0.6	0.6	0		336000	5.6	5.6	6.4	5.86667	0.46188		336000	20.9	16.2	12.8	16.6333	4.06735		336000	2.8	5.4	4.6	4.26667	1.33167
	336500	1.1	1.1	1.1	1.1	0		336500	1	1	1	1	0		336500	15.4	11.5	5.8	10.9	4.82804		336500	0.7	1.7	1.7	1.36667	0.57735
	337000	9.9	9.9	9.9	9.9	0		337000	3.2	3.2	3.2	3.2	5.43896e-16		337000	13.1	12.4	10.4	11.9667	1.40119		337000	0.7	1.8	1.8	1.43333	0.635085
	337500	5.2	5.2	7	5.8	1.03923		337500	3.1	3.1	5.2	3.8	1.21244		337500	11.7	11.7	7.8	10.4	2.25167		337500	0.7	2.7	2.7	2.03333	1.1547
	338000	7.5	7.5	12.3	9.1	2.77128		338000	2	2	3.4	2.46667	0.80829		338000	9.4	8.4	5.2	7.66667	2.19393		338000	0.6	2	2	1.53333	0.80829
	338500	3.5	3.5	3.5	3.5	0		338500	1.7	1.8	1.7	1.73333	0.057735		338500	5.7	5.6	3.9	5.06667	1.0116		338500	0.6	2.8	2.8	2.06667	1.27017
	339000	7.6	7.6	7.6	7.6	1.08779e-15		339000	2.1	3.1	2.1	2.43333	0.57735		339000	8.1	8.1	4.1	6.76667	2.3094		339000	1.1	3.1	3.1	2.43333	1.1547
	339500	2.5	2.5	2.5	2.5	0		339500	2.2	2.2	4	2.8	1.03923		339500	6.2	6.2	2.6	5	2.07846		339500	0.9	2.2	1.6	1.56667	0.650641
	340000	1.4	1.4	1.4	1.4	2.71948e-16		340000	3	3	4.8	3.6	1.03923		340000	11.9	10.2	4.1	8.73333	4.10163		340000	1.1	3.7	1.8	2.2	1.34536
	340500	6.2	6.2	6.2	6.2	0		340500	9.3	13	13	11.7667	2.1362		340500	9.9	9.9	8.2	9.33333	0.981495		340500	3	6.9	4.9	4.93333	1.95021
	341000	12.5	12.5	12.5	12.5	0		341000	4.1	5.1	5.1	4.76667	0.57735		341000	9.6	9.6	3.9	7.7	3.2909		341000	6	6	5.8	5.93333	0.11547
	341500	3.5	3.5	3.5	3.5	0		341500	2.1	2.2	2.5	2.26667	0.208167		341500	12.3	12.3	5.8	10.1333	3.75278		341500	2.3	3.5	3.5	3.1	0.69282
	342000	1.1	1.1	1.1	1.1	0		342000	6.1	7.6	6.1	6.6	0.866025		342000	16.8	11.8	9.7	12.7667	3.64737		342000	0.9	2.3	2.3	1.83333	0.80829
	342500	2.6	2.6	2.6	2.6	0		342500	1.7	1.7	2.6	2	0.519615		342500	8.2	5.6	4.2	6	2.02978		342500	0.9	3.3	3.3	2.5	1.38564
	343000	2.2	2.2	2.2	2.2	0		343000	2.4	2.4	3.1	2.63333	0.404145		343000	8.3	6.9	5.6	6.93333	1.35031		343000	0.9	2.7	1.8	1.8	0.9
	343500	3.8	3.8	4.8	4.13333	0.57735		343500	2.7	2.7	2.7	2.7	5.43896e-16		343500	12.8	11.4	6.7	10.3	3.19531		343500	0.4	1.5	1.4	1.1	0.608276
	344000	18.9	18.9	18.9	18.9	0		344000	2.4	2.4	2.4	2.4	0		344000	18.6	10.7	5.6	11.6333	6.55006		344000	0.4	2.6	2.6	1.86667	1.27017
	344500	8.8	8.8	8.8	8.8	0		344500	5.5	6.2	10.9	7.53333	2.93655		344500	14.3	5.7	3.9	7.96667	5.55818		344500	0.4	2.4	2.4	1.73333	1.1547
	345000	13.1	13.1	13.1	13.1	0		345000	1.6	1.6	4.9	2.7	1.90526		345000	15.5	13.5	6	11.6667	5.00833		345000	0.6	2	1.4	1.33333	0.702377
	345500	21.5	21.5	21.5	21.5	0		345500	1.5	1.8	1.7	1.66667	0.152753		345500	12	12	5.2	9.73333	3.92598		345500	1.1	1.2	1.1	1.13333	0.057735
	346000	22.8	22.8	22.8	22.8	0		346000	7.1	8.1	9.1	8.1	1		346000	8.3	4.2	3.6	5.36667	2.55799		346000	3.4	4.8	3	3.73333	0.945163
	346500	3.7	3.7	3.7	3.7	5.43896e-16		346500	13.7	13.7	15.4	14.2667	0.981495		346500	3.2	1.5	1.2	1.96667	1.07858		346500	2.2	5.4	5.3	4.3	1.81934
	347000	11.8	11.8	11.8	11.8	2.17558e-15		347000	6.1	6.1	9.5	7.23333	1.96299		347000	8.5	6.1	4	6.2	2.25167		347000	1.5	4.6	3.1	3.06667	1.55027
	347500	6.2	6.2	6.2	6.2	0		347500	5.8	5.8	7.7	6.43333	1.09697		347500	2.9	2.9	2.9	2.9	0		347500	0.7	1.5	1.5	1.23333	0.46188
	348000	12.2	12.2	12.2	12.2	2.17558e-15		348000	3.5	3.5	5.3	4.1	1.03923		348000	20	12.7	8.7	13.8	5.72975		348000	0.7	1.1	1.1	0.966667	0.23094
	348500	12.4	12.4	12.4	12.4	0		348500	1.5	1.5	2.9	1.96667	0.80829		348500	11.9	11.9	4.7	9.5	4.15692		348500	1.5	2.6	2.5	2.2	0.608276
	349000	11.7	11.7	11.7	11.7	2.17558e-15		349000	6.1	6.4	12.1	8.2	3.38083		349000	21.2	14.2	8.4	14.6	6.40937		349000	2.4	3.6	1	2.33333	1.30128
	349500	12	12	12	12	0		349500	10.5	11.8	11.9	11.4	0.781025		349500	12.8	10	10	10.9333	1.61658		349500	1.1	1.1	0.6	0.933333	0.288675
	350000	3.7	3.7	3.7	3.7	5.43896e-16		350000	2.1	3.1	4.1	3.1	1		350000	13.3	13.3	6.2	10.9333	4.09919		350000	0.8	0.8	0.6	0.733333	0.11547
	350500	4	4	4	4	0		350500	8	9.8	8.7	8.83333	0.907377		350500	11.6	11.4	4.3	9.1	4.15812		350500	1.6	1.6	1.1	1.43333	0.288675
	351000	1.3	1.3	1.3	1.3	0		351000	3.3	3.5	4.9	3.9	0.87178		351000	13	11.1	11.1	11.7333	1.09697		351000	4.8	7.3	7.3	6.46667	1.44338
	351500	8.8	8.8	8.8	8.8	0		351500	1	1.1	1.4	1.16667	0.208167		351500	14.7	12.3	9.2	12.0667	2.75741		351500	2.6	2.6	2.6	2.6	0
	352000	5.4	5.4	5.4	5.4	1.08779e-15		352000	2.3	3	2.9	2.73333	0.378594		352000	13.5	13.5	5.8	10.9333	4.4456		352000	1.4	1.4	1.4	1.4	2.71948e-16
	352500	3.5	3.5	3.5	3.5	0		352500	3.1	3.1	3.1	3.1	0		352500	11.4	6.8	5.8	8	2.98664		352500	2.4	6	5.4	4.6	1.92873
	353000	1.7	1.7	1.7	1.7	0		353000	1.5	1.5	1.5	1.5	0		353000	9.6	6.4	2.1	6.03333	3.76342		353000	0.4	2.5	2.5	1.8	1.21244
	353500	1.6	1.6	1.6	1.6	2.71948e-16		353500	1.6	2.5	1.6	1.9	0.519615		353500	14.9	10.5	3	9.46667	6.01692		353500	0.4	2.4	2.4	1.73333	1.1547
	354000	2.3	2.3	2.3	2.3	0		354000	1.7	2.3	3.1	2.36667	0.702377		354000	11.5	11.5	4.3	9.1	4.15692		354000	0.4	2	2	1.46667	0.92376
	354500	5.6	5.6	7.1	6.1	0.866025		354500	2	2	5.9	3.3	2.25167		354500	12	10.7	6.6	9.76667	2.81839		354500	0.4	1	1	0.8	0.34641
	355000	2.9	2.9	2.9	2.9	0		355000	2.2	2.2	5	3.13333	1.61658		355000	6.6	6.6	4.9	6.03333	0.981495		355000	0.4	1.5	1.5	1.13333	0.635085
	355500	0.8	0.8	0.8	0.8	1.35974e-16		355500	1.5	1.5	4.4	2.46667	1.67432		355500	16.7	15	4.5	12.0667	6.60782		355500	1.6	6.3	6	4.63333	2.63122
	356000	0.8	0.8	0.8	0.8	1.35974e-16		356000	5.2	6.1	6.3	5.86667	0.585947		356000	11.4	10	8	9.8	1.7088		356000	6.2	6.2	4.9	5.76667	0.750555
	356500	1.3	1.3	1.3	1.3	0		356500	4.4	4.8	4.4	4.53333	0.23094		356500	10.7	10.7	7.6	9.66667	1.78979		356500	5	7.6	3.8	5.46667	1.94251
	357000	6.1	6.1	6.1	6.1	1.08779e-15		357000	3	3.6	3	3.2	0.34641		357000	11.1	9.1	7.5	9.23333	1.8037		357000	10.1	10.1	5.5	8.56667	2.65581
	357500	2.4	2.4	2.4	2.4	0		357500	0.9	0.9	0.9	0.9	0		357500	9.2	5.5	3.7	6.13333	2.80416		357500	4.7	4.7	3.8	4.4	0.519615
	358000	2.4	2.4	2.4	2.4	0		358000	0.9	0.9	0.9	0.9	0		358000	10.7	10.5	5.4	8.86667	3.00389		358000	1.2	1.2	1.2	1.2	0
	358500	1.8	1.8	1.8	1.8	0		358500	1.7	2.3	1.7	1.9	0.34641		358500	16.9	13.8	6.1	12.2667	5.56088		358500	1.5	1.8	1.8	1.7	0.173205
	359000	0.8	0.8	0.8	0.8	1.35974e-16		359000	2.1	2.8	3.2	2.7	0.556776		359000	16.9	11.3	1.9	10.0333	7.5798		359000	4	6.6	5.5	5.36667	1.30512
	359500	0.6	0.6	0.6	0.6	0		359500	1.8	3	3.7	2.83333	0.960902		359500	7.1	7.1	3.7	5.96667	1.96299		359500	1.6	4.8	4.6	3.66667	1.79258
	360000	0.6	0.6	0.6	0.6	0		360000	1.8	3.6	3	2.8	0.916515		360000	10.4	10.4	9.1	9.96667	0.750555		360000	1.1	2.4	1.6	1.7	0.655744
	360500	0.6	0.6	0.6	0.6	0		360500	3.1	3.1	4.2	3.46667	0.635085		360500	10	8.3	4.7	7.66667	2.70617		360500	0.8	1	1	0.933333	0.11547
	361000	3.7	3.7	3.7	3.7	5.43896e-16		361000	2.8	3.6	3.7	3.36667	0.493288		361000	30.6	11.5	7.6	16.5667	12.3087		361000	1.3	2.7	2.6	2.2	0.781025
	361500	4.2	4.2	4.2	4.2	0		361500	1.7	2.5	2.3	2.16667	0.416333		361500	10.5	8.7	3.5	7.56667	3.63501		361500	3.4	7.9	6.9	6.06667	2.36291
	362000	7.3	7.3	7.3	7.3	0		362000	1.4	1.4	4.2	2.33333	1.61658		362000	15.6	9.6	4.3	9.83333	5.65361		362000	0.6	2.8	2.8	2.06667	1.27017
	362500	4.6	7.6	7.6	6.6	1.73205		362500	6.9	6.9	11	8.26667	2.36714		362500	8.3	5	3.3	5.53333	2.54231		362500	0.6	1.7	1.7	1.33333	0.635085
	363000	5.2	5.2	5.2	5.2	0		363000	8.9	8.9	8.9	8.9	0		363000	6.8	6.8	6.8	6.8	0		363000	0.6	2	2	1.53333	0.80829
	363500	1.2	1.2	3.4	1.93333	1.27017		363500	9.9	9.9	11.3	10.3667	0.80829		363500	5.3	5.3	4.1	4.9	0.69282		363500	1.5	6.3	4.7	4.16667	2.44404
	364000	0.6	0.6	1.2	0.8	0.34641		364000	7.1	7.1	8.9	7.7	1.03923		364000	14.2	10.3	6.4	10.3	3.9		364000	1.8	3.7	3.7	3.06667	1.09697
	364500	0.6	0.6	0.9	0.7	0.173205		364500	3.3	5	3.9	4.06667	0.862168		364500	13.6	13.6	13.6	13.6	0		364500	4.3	5.6	3.7	4.53333	0.971253
	365000	3.1	3.1	3.9	3.36667	0.46188		365000	1.9	3	2.8	2.56667	0.585947		365000	7.5	7.5	6	7	0.866025		365000	4.2	5.7	3.7	4.53333	1.04083
	365500	4.5	4.5	4.5	4.5	0		365500	1	1.6	2.1	1.56667	0.550757		365500	10.4	8.7	3.3	7.46667	3.7072		365500	2.7	5.3	5.2	4.4	1.47309
	366000	2.2	2.2	2.2	2.2	0		366000	1.7	2.1	3.2	2.33333	0.776745		366000	12.1	12.1	5.8	10	3.63731		366000	3.3	6.4	4.8	4.83333	1.55027
	366500	2.5	2.5	2.5	2.5	0		366500	2.4	2.5	2.4	2.43333	0.057735		366500	11.6	9.9	6.6	9.36667	2.54231		366500	1.4	4.1	4.1	3.2	1.55885
	367000	4.5	4.5	3	4	0.866025		367000	2	3.4	2	2.46667	0.80829		367000	13.5	13.5	8	11.6667	3.17543		367000	1.6	2.6	2.6	2.26667	0.57735
	367500	8.7	8.7	8.1	8.5	0.34641		367500	1.5	4.4	2.8	2.9	1.45258		367500	14	14	7.9	11.9667	3.52184		367500	0.9	1	1	0.966667	0.057735
	368000	4.5	4.5	4.5	4.5	0		368000	1.4	2.7	4.1	2.73333	1.35031		368000	13.7	9.6	6.8	10.0333	3.47035		368000	2.3	2.4	2.4	2.36667	0.057735
	368500	1	1	1	1	0		368500	3.9	4.8	7	5.23333	1.59478		368500	11.4	8.2	4.9	8.16667	3.25013		368500	5.7	5.7	4.3	5.23333	0.80829
	369000	1.9	1.9	1.9	1.9	2.71948e-16		369000	1.2	1.2	5.6	2.66667	2.54034		369000	12.7	11	7.5	10.4	2.65141		369000	0.9	1.7	1.7	1.43333	0.46188
	369500	2.6	2.6	2.6	2.6	0		369500	5.3	5.3	10.8	7.13333	3.17543		369500	7.5	7.4	6.1	7	0.781025		369500	0.5	0.6	0.6	0.566667	0.057735
	370000	2.6	2.6	2.6	2.6	0		370000	8.8	8.8	10.3	9.3	0.866025		370000	16.7	16.7	9.3	14.2333	4.27239		370000	0.5	0.6	0.6	0.566667	0.057735
	370500	5.4	5.4	5.4	5.4	1.08779e-15		370500	2.7	3.2	4	3.3	0.655744		370500	17.3	13.4	7.9	12.8667	4.72264		370500	0.5	0.6	0.6	0.566667	0.057735
	371000	1.1	1.1	1.1	1.1	0		371000	1.7	2.6	2	2.1	0.458258		371000	11.3	9.4	5.6	8.76667	2.9023		371000	2.7	3.3	2.3	2.76667	0.503322
	371500	0.7	0.7	0.7	0.7	1.35974e-16		371500	2.3	2.3	5.1	3.23333	1.61658		371500	6.4	6.4	5.5	6.1	0.519615		371500	7.8	12.4	8.7	9.63333	2.4379
	372000	0.5	0.5	0.5	0.5	0		372000	4.3	4.3	5.8	4.8	0.866025		372000	17.2	15.6	9.4	14.0667	4.11987		372000	2.4	7.2	7.1	5.56667	2.74287
	372500	0.5	0.5	0.5	0.5	0		372500	2.4	3.5	3.2	3.03333	0.568624		372500	14.7	11.3	4.4	10.1333	5.24817		372500	0.7	2.2	2.2	1.7	0.866025
	373000	0.5	0.5	0.5	0.5	0		373000	2.1	3.8	2.8	2.9	0.8544		373000	10.4	5.7	2.9	6.33333	3.7899		373000	0.7	2.7	2.7	2.03333	1.1547
	373500	1.4	1.4	1.4	1.4	2.71948e-16		373500	1.6	1.6	1.6	1.6	2.71948e-16		373500	20.7	15.5	7.3	14.5	6.75574		373500	1.6	14.3	14.3	10.0667	7.33235
	374000	1.9	1.9	1.9	1.9	2.71948e-16		374000	3	3.6	3.6	3.4	0.34641		374000	12	6.5	4.1	7.53333	4.0501		374000	0.4	2	2	1.46667	0.92376
	374500	0.7	0.7	0.7	0.7	1.35974e-16		374500	1.4	1.4	1.4	1.4	2.71948e-16		374500	20.7	16.2	4.4	13.7667	8.41804		374500	0.4	0.8	0.8	0.666667	0.23094
	375000	0.7	0.7	0.7	0.7	1.35974e-16		375000	2.6	2.6	2.6	2.6	0		375000	12.3	10.5	3.5	8.76667	4.64901		375000	0.4	1.1	1.1	0.866667	0.404145
	375500	1.9	1.9	1.9	1.9	2.71948e-16		375500	5.4	6.3	6.5	6.06667	0.585947		375500	11.3	9.1	3.8	8.06667	3.8553		375500	0.4	1.5	1.5	1.13333	0.635085
	376000	0.9	0.9	0.9	0.9	0		376000	3.6	3.9	4.3	3.93333	0.351188		376000	9	6.7	6.7	7.46667	1.32791		376000	0.4	1.1	1.1	0.866667	0.404145
	376500	1.3	1.3	1.3	1.3	0		376500	1.6	1.6	1.6	1.6	2.71948e-16		376500	18.6	8.4	5.8	10.9333	6.7656		376500	0.6	1.6	1.6	1.26667	0.57735
	377000	2	2	2	2	0		377000	3.4	3.4	3.4	3.4	0		377000	12.4	12.1	10.4	11.6333	1.07858		377000	7.4	7.5	7.5	7.46667	0.057735
	377500	2.4	2.4	2.4	2.4	0		377500	1.2	1.2	1.2	1.2	0		377500	15.8	9.7	6.5	10.6667	4.72476		377500	2.5	5	3.8	3.76667	1.25033
	378000	1.9	1.9	1.9	1.9	2.71948e-16		378000	2	2	2.3	2.1	0.173205		378000	8.2	3.7	2.5	4.8	3.005		378000	3.2	10.5	10.5	8.06667	4.21466
	378500	0.8	0.8	0.8	0.8	1.35974e-16		378500	6.9	6.9	8.7	7.5	1.03923		378500	6.6	5.5	5.1	5.73333	0.776745		378500	0.7	4.5	4.5	3.23333	2.19393
	379000	2.1	2.1	2.1	2.1	0		379000	12.3	12.3	12.3	12.3	2.17558e-15		379000	8.5	7.3	6.1	7.3	1.2		379000	0.7	2.2	2.2	1.7	0.866025
	379500	2.3	2.3	2.3	2.3	0		379500	2.8	2.8	3.1	2.9	0.173205		379500	7.1	7.1	5.3	6.5	1.03923		379500	0.4	2.7	2.7	1.93333	1.32791
	380000	0.9	0.9	0.9	0.9	0		380000	1	1	1.1	1.03333	0.057735		380000	9.3	7.7	7.6	8.2	0.953939		380000	0.3	2.3	2.3	1.63333	1.1547
	380500	2.8	2.8	3.5	3.03333	0.404145		380500	1.3	1.3	2.7	1.76667	0.80829		380500	14.6	14.6	9.8	13	2.77128		380500	0.3	4.9	4.9	3.36667	2.65581
	381000	3	3	3	3	0		381000	2	2	2.1	2.03333	0.057735		381000	20.3	16.9	10.1	15.7667	5.19359		381000	0.3	1.4	1.4	1.03333	0.635085
	381500	1.3	1.3	1.5	1.36667	0.11547		381500	7.5	7.5	7.5	7.5	0		381500	12.7	9.4	8.2	10.1	2.33024		381500	0.3	0.5	0.5	0.433333	0.11547
	382000	1.1	1.1	2.2	1.46667	0.635085		382000	4.8	4.8	4.8	4.8	0		382000	6.9	3.4	3.4	4.56667	2.02073		382000	0.3	0.5	0.5	0.433333	0.11547
	382500	1.1	1.1	2	1.4	0.519615		382500	1.3	1.3	1.3	1.3	0		382500	10.6	6.4	5.1	7.36667	2.8746		382500	0.3	1	1	0.766667	0.404145
	383000	1.6	1.6	1.6	1.6	2.71948e-16		383000	2.4	2.4	2.4	2.4	0		383000	9.5	6.8	4.5	6.93333	2.50267		383000	0.4	1.6	1.6	1.2	0.69282
	383500	2.7	2.7	3.3	2.9	0.34641		383500	1.7	4.6	2.6	2.96667	1.48436		383500	9.7	6.4	3.6	6.56667	3.05341		383500	0.8	0.8	0.8	0.8	1.35974e-16
	384000	0.8	0.8	0.8	0.8	1.35974e-16		384000	2.3	3.5	2.3	2.7	0.69282		384000	11.7	8.7	3.5	7.96667	4.1489		384000	2	3.4	2.8	2.73333	0.702377
	384500	0.8	0.8	0.8	0.8	1.35974e-16		384500	1.9	1.9	1.9	1.9	2.71948e-16		384500	13.8	10.8	6.2	10.2667	3.82797		384500	0.6	3.5	3.5	2.53333	1.67432
	385000	2.5	2.5	3.1	2.7	0.34641		385000	4.3	4.3	4.3	4.3	0		385000	7.3	5.8	3.7	5.6	1.80831		385000	0.6	3	3	2.2	1.38564
	385500	5	5	5	5	0		385500	1.6	1.6	2.4	1.86667	0.46188		385500	8.1	7.9	3.9	6.63333	2.36925		385500	0.6	3.3	3.3	2.4	1.55885
	386000	1.4	1.4	1.4	1.4	2.71948e-16		386000	1	1	1	1	0		386000	10.2	8.9	7.6	8.9	1.3		386000	1.7	8.4	8.4	6.16667	3.86825
	386500	17.5	6.3	4.5	9.43333	7.04367		386500	1.9	1.9	1.9	1.9	2.71948e-16		386500	8.1	8.1	8.1	8.1	0		386500	0.8	1.7	1.7	1.4	0.519615
	387000	17.2	11.7	14.4	14.4333	2.75015		387000	8.9	8.9	8.9	8.9	0		387000	14.7	11	5.4	10.3667	4.68224		387000	3.3	5.3	5.3	4.63333	1.1547
	387500	2.2	3	3	2.73333	0.46188		387500	6.5	7.8	7.8	7.36667	0.750555		387500	13.7	10.2	4.7	9.53333	4.53689		387500	0.8	0.9	0.9	0.866667	0.057735
	388000	1.3	2.6	2.6	2.16667	0.750555		388000	2.5	3.8	3.8	3.36667	0.750555		388000	13.2	13.2	9.7	12.0333	2.02073		388000	0.8	0.9	0.9	0.866667	0.057735
	388500	5.4	5.1	6	5.5	0.458258		388500	5.5	5.6	7	6.03333	0.83865		388500	9.3	7	4.6	6.96667	2.35018		388500	0.9	2.7	2.7	2.1	1.03923
	389000	9.7	1.4	1.4	4.16667	4.79201		389000	5.5	5.5	6.9	5.96667	0.80829		389000	5.4	5.4	5.1	5.3	0.173205		389000	1.2	3.1	3.1	2.46667	1.09697
	389500	7.4	4	4	5.13333	1.96299		389500	3.2	3.2	5.6	4	1.38564		389500	5.9	5.9	4.6	5.46667	0.750555		389500	4.7	10.6	10.6	8.63333	3.40637
	390000	5	3.5	3.5	4	0.866025		390000	6.4	6.4	7.7	6.83333	0.750555		390000	11.4	9.5	3.6	8.16667	4.06735		390000	2.2	4.3	4.3	3.6	1.21244
	390500	5.1	5.1	5.1	5.1	0		390500	7.4	7.4	7.4	7.4	1.08779e-15		390500	15.4	15.4	11.8	14.2	2.07846		390500	2.1	2.5	2.1	2.23333	0.23094
	391000	5.8	5.8	5.8	5.8	0		391000	7	7	7	7	0		391000	10.7	9.2	6.4	8.76667	2.18251		391000	0.5	0.6	0.6	0.566667	0.057735
	391500	1.3	1.3	1.3	1.3	0		391500	2.6	2.6	2.6	2.6	0		391500	7.9	7.9	5.6	7.13333	1.32791		391500	0.5	0.6	0.6	0.566667	0.057735
	392000	0.7	0.7	0.7	0.7	1.35974e-16		392000	1.1	1.1	1.1	1.1	0		392000	12.8	11.2	8	10.6667	2.44404		392000	0.5	0.6	0.6	0.566667	0.057735
	392500	0.7	0.7	0.7	0.7	1.35974e-16		392500	1.2	1.2	2.2	1.53333	0.57735		392500	16.3	11.9	9.5	12.5667	3.44867		392500	1.9	1.4	1.4	1.56667	0.288675
	393000	3.1	3.1	3.1	3.1	0		393000	1.5	1.9	3.5	2.3	1.0583		393000	6	6	4.2	5.4	1.03923		393000	1.1	1.7	1.7	1.5	0.34641
	393500	1	1	1	1	0		393500	3.1	4.7	4.9	4.23333	0.986577		393500	11	7.8	4.2	7.66667	3.40196		393500	0.4	0.7	0.7	0.6	0.173205
	394000	0.5	0.5	0.5	0.5	0		394000	3.7	3.7	4.6	4	0.519615		394000	10.4	10.4	5.2	8.66667	3.00222		394000	0.4	1.2	1.2	0.933333	0.46188
	394500	0.5	0.5	0.5	0.5	0		394500	1.1	1.1	1.1	1.1	0		394500	12.5	12.5	10.9	11.9667	0.92376		394500	0.4	2.6	2.6	1.86667	1.27017
	395000	2	2	2	2	0		395000	1.9	1.9	1.9	1.9	2.71948e-16		395000	18.9	15.1	11.4	15.1333	3.75011		395000	0.4	2.7	2.6	1.9	1.3
	395500	1.5	1.5	2.7	1.9	0.69282		395500	4.2	4.2	4.2	4.2	0		395500	12.2	12.2	10.7	11.7	0.866025		395500	2.3	9	7.2	6.16667	3.46747
	396000	0.3	0.3	0.6	0.4	0.173205		396000	2.4	2.4	2.4	2.4	0		396000	15	11.2	6.2	10.8	4.41362		396000	0.8	3.4	3.4	2.53333	1.50111
	396500	0.3	0.3	0.6	0.4	0.173205		396500	3.7	3.7	3.7	3.7	5.43896e-16		396500	9	8.7	5.4	7.7	1.9975		396500	1.9	5.3	5.3	4.16667	1.96299
	397000	0.3	0.3	0.6	0.4	0.173205		397000	9.1	9.1	9.1	9.1	0		397000	8	6.8	3	5.93333	2.61024		397000	1.3	3.9	3.9	3.03333	1.50111
	397500	0.3	0.3	0.7	0.433333	0.23094		397500	8.8	8.8	8.8	8.8	0		397500	14.3	11.5	5.7	10.5	4.38634		397500	0.8	2.9	2.9	2.2	1.21244
	398000	0.3	0.3	0.9	0.5	0.34641		398000	5.7	8	5.7	6.46667	1.32791		398000	12.8	12.8	11	12.2	1.03923		398000	0.8	9.8	9.8	6.8	5.19615
	398500	1.2	1.2	2.9	1.76667	0.981495		398500	2.8	5.5	6.5	4.93333	1.91398		398500	14.4	10.4	5.6	10.1333	4.40606		398500	1.8	8.4	6.7	5.63333	3.42685
	399000	3.6	3.6	3.6	3.6	0		399000	1	2	3	2	1		399000	10.9	10.6	5	8.83333	3.32315		399000	4.8	9.2	5.7	6.56667	2.32451
	399500	0.2	1	4.5	1.9	2.28692		399500	3.6	7	7	5.86667	1.96299		399500	5.7	5.7	3.2	4.86667	1.44338		399500	3	3	1.3	2.43333	0.981495
	400000	0.1	0.6	5.3	2	2.8688		400000	3.9	3.9	3.9	3.9	0		400000	17	13	8.6	12.8667	4.20159		400000	4	8.4	3.6	5.33333	2.66333
	400500	0.1	0.6	4.3	1.66667	2.2942		400500	2.9	3.6	2.9	3.13333	0.404145		400500	15	12	10.3	12.4333	2.37978		400500	0.9	6.6	6.6	4.7	3.2909
	401000	0.1	0.6	4.6	1.76667	2.46644		401000	1.3	1.6	1.3	1.4	0.173205		401000	8.8	7.7	5.3	7.26667	1.78979		401000	1.6	4.7	3.2	3.16667	1.55027
	401500	0.1	0.8	8.6	3.16667	4.7184		401500	6.2	6.8	7	6.66667	0.416333		401500	10.5	10.5	5.7	8.9	2.77128		401500	4.1	4.6	2.1	3.6	1.32288
	402000	0.1	0.3	3.8	1.4	2.08087		402000	6.7	6.7	8.1	7.16667	0.80829		402000	11.1	9.5	5.9	8.83333	2.66333		402000	8.5	9.9	6.7	8.36667	1.60416
	402500	0.1	0.1	2	0.733333	1.09697		402500	2.6	2.6	2.6	2.6	0		402500	12.5	9.8	8	10.1	2.26495		402500	2.6	2.6	2.6	2.6	0
	403000	0.1	0.1	1.2	0.466667	0.635085		403000	1.3	1.3	1.3	1.3	0		403000	8.6	8.1	6.5	7.73333	1.09697		403000	1.9	3.8	3.8	3.16667	1.09697
	403500	0.1	0.1	0.8	0.333333	0.404145		403500	1.7	1.8	2.1	1.86667	0.208167		403500	7.8	7.8	6.7	7.43333	0.635085		403500	4.1	7	5.6	5.56667	1.45029
	404000	0.1	0.1	0.8	0.333333	0.404145		404000	1	2.1	2.1	1.73333	0.635085		404000	15.2	11.4	3.8	10.1333	5.8046		404000	1.5	3.7	2.9	2.7	1.11355
	404500	0.1	0.1	0.7	0.3	0.34641		404500	4.8	9.3	7.8	7.3	2.29129		404500	16.8	11.7	4.7	11.0667	6.07481		404500	1.1	1.1	1	1.06667	0.057735
	405000	0.1	0.1	0.2	0.133333	0.057735		405000	7.1	7.1	7.1	7.1	1.08779e-15		405000	16.8	9.8	3.5	10.0333	6.65307		405000	4.4	5.5	4.6	4.83333	0.585947
	405500	0.1	0.1	0.2	0.133333	0.057735		405500	5.4	6.7	5.4	5.83333	0.750555		405500	7.6	6.5	3.2	5.76667	2.28983		405500	11.9	14.5	12.8	13.0667	1.32035
	406000	0.1	0.1	0.2	0.133333	0.057735		406000	1.7	3.5	1.7	2.3	1.03923		406000	5	5	5	5	0		406000	2.2	5.1	5.1	4.13333	1.67432
	406500	0.1	0.1	0.2	0.133333	0.057735		406500	2	3.1	2	2.36667	0.635085		406500	12.1	10.4	6.9	9.8	2.65141		406500	0.7	2	2	1.56667	0.750555
	407000	0.1	0.1	0.2	0.133333	0.057735		407000	1.9	1.9	2	1.93333	0.057735		407000	18.1	12.6	7.2	12.6333	5.45008		407000	0.7	2.7	2.7	2.03333	1.1547
	407500	0.1	0.1	0.2	0.133333	0.057735		407500	3.3	4.9	4.9	4.36667	0.92376		407500	14.7	14.7	10.8	13.4	2.25167		407500	0.7	2.4	2.4	1.83333	0.981495
	408000	0.1	0.1	0.2	0.133333	0.057735		408000	1.6	1.7	2.6	1.96667	0.550757		408000	13.5	10.5	7	10.3333	3.2532		408000	0.7	1.4	1.4	1.16667	0.404145
	408500	0.1	0.1	0.2	0.133333	0.057735		408500	2.4	2.4	5.7	3.5	1.90526		408500	11.5	9.9	6.6	9.33333	2.49867		408500	0.7	1.4	1.4	1.16667	0.404145
	409000	0.2	0.2	0.5	0.3	0.173205		409000	3	3	6.1	4.03333	1.78979		409000	14.9	9.9	5.4	10.0667	4.75219		409000	1.8	4.7	2.8	3.1	1.47309
	409500	0.5	0.5	0.5	0.5	0		409500	8.8	8.8	8.8	8.8	0		409500	9.3	6.7	6.7	7.56667	1.50111		409500	1.6	3.3	2.7	2.53333	0.862168
	410000	0.5	0.5	0.5	0.5	0		410000	15.5	15.5	15.5	15.5	0		410000	9.6	7.7	6.8	8.03333	1.42945		410000	5.6	6.4	6.4	6.13333	0.46188
	410500	0.5	0.5	0.5	0.5	0		410500	5.1	5.1	5.1	5.1	0		410500	11.6	10.7	4.6	8.96667	3.80832		410500	8.7	8.7	6.9	8.1	1.03923
	411000	4.8	8.7	11.2	8.23333	3.22542		411000	2.6	4	4.3	3.63333	0.907377		411000	11.3	9.4	6.8	9.16667	2.25906		411000	8.5	11.2	9.3	9.66667	1.38684
	411500	7.3	8.6	13.3	9.73333	3.15647		411500	1.1	2.3	2.3	1.9	0.69282		411500	10.4	7.4	4	7.26667	3.20208		411500	3.8	6.2	6.2	5.4	1.38564
	412000	2.2	2.2	4.4	2.93333	1.27017		412000	1.7	2.3	4.4	2.8	1.41774		412000	7.2	6	3.6	5.6	1.83303		412000	1.5	2.9	2.9	2.43333	0.80829
	412500	1.7	1.7	1.7	1.7	0		412500	3.4	3.4	4.8	3.86667	0.80829		412500	11.4	11.4	11.4	11.4	0		412500	2.3	3.4	3	2.9	0.556776
	413000	3.2	3.2	3.2	3.2	5.43896e-16		413000	1.7	1.7	2.8	2.06667	0.635085		413000	12.3	9.2	9.2	10.2333	1.78979		413000	4.2	11.3	10	8.5	3.78021
	413500	2.1	2.1	2.1	2.1	0		413500	1.7	1.7	3.3	2.23333	0.92376		413500	7.7	7.7	7.7	7.7	0		413500	1	5.4	5.4	3.93333	2.54034
	414000	0.8	0.8	0.8	0.8	1.35974e-16		414000	4.4	4.4	7.5	5.43333	1.78979		414000	8.4	7.2	4.7	6.76667	1.88768		414000	1.7	2.6	1.9	2.06667	0.472582
	414500	1.4	1.4	1.4	1.4	2.71948e-16		414500	1.3	1.3	4.4	2.33333	1.78979		414500	13.3	13.3	8.9	11.8333	2.54034		414500	3.6	10.4	5.9	6.63333	3.45881
	415000	3.2	3.2	3.2	3.2	5.43896e-16		415000	5.7	5.7	11.3	7.56667	3.23316		415000	11.3	11.3	7.8	10.1333	2.02073		415000	1.4	5.2	5.2	3.93333	2.19393
	415500	0.7	0.7	0.7	0.7	1.35974e-16		415500	2.2	3.3	2.2	2.56667	0.635085		415500	28.4	22.7	10.6	20.5667	9.08974		415500	8.3	19.7	17.1	15.0333	5.97439
	416000	0.7	0.7	0.7	0.7	1.35974e-16		416000	1.8	1.9	1.8	1.83333	0.057735		416000	7.3	4.3	3.7	5.1	1.92873		416000	5.2	6.5	5.2	5.63333	0.750555
	416500	1.1	1.1	1.1	1.1	0		416500	1.7	1.7	1.7	1.7	0		416500	16.5	8.9	3	9.46667	6.76782		416500	2.2	5.8	5.8	4.6	2.07846
	417000	1.7	1.7	1.7	1.7	0		417000	1.9	1.9	1.9	1.9	2.71948e-16		417000	15.6	13.8	8.5	12.6333	3.69098		417000	0.9	5	4.9	3.6	2.3388
	417500	1.2	1.2	1.2	1.2	0		417500	3.1	3.1	3.1	3.1	0		417500	10.2	8.7	4.4	7.76667	3.01054		417500	3.2	6.9	4.9	5	1.85203
	418000	1.3	1.3	1.3	1.3	0		418000	5.4	5.4	5.4	5.4	1.08779e-15		418000	19.5	13.6	13.6	15.5667	3.40637		418000	3.3	10.2	8.7	7.4	3.62905
	418500	3	3	3.3	3.1	0.173205		418500	5.6	5.6	5.6	5.6	1.08779e-15		418500	13	13	9.3	11.7667	2.1362		418500	0.7	2.9	2.9	2.16667	1.27017
	419000	1	1	1.3	1.1	0.173205		419000	1.4	1.4	3.7	2.16667	1.32791		419000	9	9	6.1	8.03333	1.67432		419000	0.7	2.6	2.6	1.96667	1.09697
	419500	0.6	0.6	2	1.06667	0.80829		419500	1	1	2.4	1.46667	0.80829		419500	19.7	13.2	6.6	13.1667	6.55006		419500	1.8	7.5	6.7	5.33333	3.08599
	420000	0.4	0.4	0.8	0.533333	0.23094		420000	1.4	1.4	3	1.93333	0.92376		420000	9.1	7.2	5.8	7.36667	1.6563		420000	8.7	8.7	7.5	8.3	0.69282
	420500	0.4	0.4	0.5	0.433333	0.057735		420500	12.5	12.5	11.2	12.0667	0.750555		420500	11.6	9.8	7	9.46667	2.31805		420500	2.5	4.1	3.1	3.23333	0.80829
	421000	0.4	0.4	0.5	0.433333	0.057735		421000	6.2	6.2	6.2	6.2	0		421000	13.9	11.8	5.1	10.2667	4.59601		421000	0.8	2.6	2.6	2	1.03923
	421500	0.4	0.4	0.5	0.433333	0.057735		421500	1.1	1.1	1.1	1.1	0		421500	16.2	6.5	2.6	8.43333	7.00309		421500	1.4	3.9	3.9	3.06667	1.44338
	422000	0.7	0.7	0.8	0.733333	0.057735		422000	2.2	2.2	2.2	2.2	0		422000	12.1	11.8	5.3	9.73333	3.84231		422000	3.9	4.7	4.7	4.43333	0.46188
	422500	3	3	3	3	0		422500	2.2	2.2	3	2.46667	0.46188		422500	13	13	8.8	11.6	2.42487		422500	1.4	3.3	2.2	2.3	0.953939
	423000	12	12	12	12	0		423000	1.6	1.6	4.8	2.66667	1.84752		423000	16.7	12	3.6	10.7667	6.63652		423000	2.3	3.4	2	2.56667	0.737111
	423500	5.4	5.4	5.4	5.4	1.08779e-15		423500	3.6	5.4	6	5	1.249		423500	15.3	7.9	6.5	9.9	4.72864		423500	5.4	6.7	4.1	5.4	1.3
	424000	9.1	9.1	9.1	9.1	0		424000	3.2	3.2	3.4	3.26667	0.11547		424000	7.6	5	5	5.86667	1.50111		424000	1.2	4.5	4.5	3.4	1.90526
	424500	8.5	8.5	8.5	8.5	0		424500	1.6	1.6	2.9	2.03333	0.750555		424500	7.3	7.3	5.5	6.7	1.03923		424500	1	3.7	3.7	2.8	1.55885
	425000	7.3	7.3	7.3	7.3	0		425000	6.1	6.1	8	6.73333	1.09697		425000	18.3	16.8	7	14.0333	6.13705		425000	2.3	8.4	8.4	6.36667	3.52184
	425500	10.8	10.8	10.8	10.8	2.17558e-15		425500	4.5	4.5	6	5	0.866025		425500	10.4	7.4	5.9	7.9	2.29129		425500	3.5	5.7	5.7	4.96667	1.27017
	426000	6.5	6.5	6.5	6.5	0		426000	7.4	7.4	8.7	7.83333	0.750555		426000	6.3	3.5	2.3	4.03333	2.05264		426000	8.1	8.4	8.4	8.3	0.173205
	426500	3.7	3.7	3.7	3.7	5.43896e-16		426500	8.6	9.6	9.8	9.33333	0.64291		426500	12.6	6.8	5.5	8.3	3.78021		426500	4.8	8.2	8.2	7.06667	1.96299
	427000	5.1	5.1	5.5	5.23333	0.23094		427000	1.6	3.2	2.3	2.36667	0.802081		427000	14.8	13	6.7	11.5	4.25323		427000	1.2	3.9	3.9	3	1.55885
	427500	2.2	2.2	3.9	2.76667	0.981495		427500	0.9	1.1	3.8	1.93333	1.61967		427500	12.3	9.8	4.1	8.73333	4.20278		427500	1	4.1	3.9	3	1.73494
	428000	2.8	2.8	3.7	3.1	0.519615		428000	2.7	3.7	5.8	4.06667	1.58219		428000	7.8	5.8	5.2	6.26667	1.36137		428000	2.9	6.1	4.6	4.53333	1.60104
	428500	1.6	1.6	1.6	1.6	2.71948e-16		428500	5.9	5.9	8.3	6.7	1.38564		428500	6.4	5.1	5.1	5.53333	0.750555		428500	4.3	8.1	4.8	5.73333	2.06478
	429000	2	2	2	2	0		429000	2.7	2.7	3.6	3	0.519615		429000	5.1	5.1	5.1	5.1	0		429000	2	3.1	2.8	2.63333	0.568624
	429500	1.5	1.5	1.5	1.5	0		429500	1.6	2.2	3.2	2.33333	0.80829		429500	13.1	9.8	8.2	10.3667	2.49867		429500	1	2.1	2.1	1.73333	0.635085
	430000	1.3	1.3	1.3	1.3	0		430000	1.2	2.5	1.2	1.63333	0.750555		430000	13.1	10.6	6.6	10.1	3.27872		430000	0.7	2.7	2.7	2.03333	1.1547
	430500	1.8	1.8	1.8	1.8	0		430500	2.3	3.2	3.5	3	0.6245		430500	11.2	11.2	7.4	9.93333	2.19393		430500	0.7	1.5	1.5	1.23333	0.46188
	431000	6.5	6.5	6.5	6.5	0		431000	2	2	2	2	0		431000	9.7	5.5	4.1	6.43333	2.91433		431000	0.8	1	1	0.933333	0.11547
	431500	2.8	3	3	2.93333	0.11547		431500	8	8.7	8	8.23333	0.404145		431500	5.6	5.1	3.6	4.76667	1.04083		431500	1	1.2	1.2	1.13333	0.11547
	432000	0.7	0.8	0.8	0.766667	0.057735		432000	1.6	1.6	1.9	1.7	0.173205		432000	18.7	13.1	11.2	14.3333	3.89915		432000	2.1	3.8	3	2.96667	0.85049
	432500	0.7	0.8	0.8	0.766667	0.057735		432500	2.6	2.6	3.5	2.9	0.519615		432500	21.1	17.6	12	16.9	4.59021		432500	1.2	2.4	2.4	2	0.69282
	433000	2.4	2.9	2.4	2.56667	0.288675		433000	4.3	4.5	4.3	4.36667	0.11547		433000	11	11	5.3	9.1	3.2909		433000	2.3	5.4	5.4	4.36667	1.78979
	433500	1.5	1.5	3.9	2.3	1.38564		433500	2.3	3.4	2.3	2.66667	0.635085		433500	7.7	7.7	3.3	6.23333	2.54034		433500	1.9	8	8	5.96667	3.52184
	434000	0.8	0.8	1.5	1.03333	0.404145		434000	3.6	4.4	6	4.66667	1.22202		434000	6.2	6.2	3.1	5.16667	1.78979		434000	0.6	2.7	2.7	2	1.21244
	434500	2.1	1.4	1.9	1.8	0.360555		434500	1.3	2.6	2.6	2.16667	0.750555		434500	7.2	6.5	6.3	6.66667	0.472582		434500	0.6	3.5	3.5	2.53333	1.67432
	435000	6.6	6.2	6.3	6.36667	0.208167		435000	2.3	3.8	4.1	3.4	0.964365		435000	7.5	6	6	6.5	0.866025		435000	0.6	3.4	3.4	2.46667	1.61658
	435500	9.2	9.2	5.5	7.96667	2.1362		435500	3.4	3.4	3.4	3.4	0		435500	12.3	7.4	3.3	7.66667	4.50592		435500	1.8	7.6	7.5	5.63333	3.32014
	436000	5.2	5.2	6.2	5.53333	0.57735		436000	3.6	3.6	3.6	3.6	0		436000	18.6	11.6	1.6	10.6	8.544		436000	2.5	4	2.7	3.06667	0.814453
	436500	2.5	2.5	2.6	2.53333	0.057735		436500	1.4	1.4	1.4	1.4	2.71948e-16		436500	11.1	9.2	6.7	9	2.20681		436500	5.9	6.9	4.9	5.9	1
	437000	7.4	7.4	7.4	7.4	1.08779e-15		437000	0.8	0.8	0.8	0.8	1.35974e-16		437000	8.5	5.1	5.1	6.23333	1.96299		437000	7.3	12.6	12.6	10.8333	3.05996
	437500	3.4	3.4	3.4	3.4	0		437500	1.2	1.3	1.8	1.43333	0.321455		437500	8	7	6	7	1		437500	1.3	2.6	2.6	2.16667	0.750555
	438000	2.5	2.5	2.5	2.5	0		438000	3.8	5.1	4.5	4.46667	0.650641		438000	9	7.5	7.5	8	0.866025		438000	1.6	4.1	4.1	3.26667	1.44338
	438500	1.4	1.4	1.4	1.4	2.71948e-16		438500	2.5	2.5	3.7	2.9	0.69282		438500	16.1	6.9	3.7	8.9	6.43739		438500	0.6	1.7	1.7	1.33333	0.635085
	439000	0.8	0.8	0.8	0.8	1.35974e-16		439000	1.5	1.5	3.7	2.23333	1.27017		439000	5.5	2.7	1.3	3.16667	2.13854		439000	0.6	1.5	1.5	1.2	0.519615
	439500	0.8	0.8	0.8	0.8	1.35974e-16		439500	1.4	1.4	1.4	1.4	2.71948e-16		439500	6.4	6.4	2.8	5.2	2.07846		439500	2	4.3	3.4	3.23333	1.15902
	440000	2.3	2.3	2.3	2.3	0		440000	6.4	7.3	7.3	7	0.519615		440000	16.3	13.1	12.5	13.9667	2.04287		440000	2.5	5.4	4.6	4.16667	1.49778
	440500	7	7	7	7	0		440500	4.2	4.2	4.2	4.2	0		440500	21.9	19.9	9.9	17.2333	6.4291		440500	0.6	1.3	1.3	1.06667	0.404145
	441000	1.9	1.9	1.9	1.9	2.71948e-16		441000	1.9	1.9	2.9	2.23333	0.57735		441000	11.4	9.4	3.3	8.03333	4.2194		441000	0.6	1.7	1.7	1.33333	0.635085
	441500	2	2	2	2	0		441500	3.8	5.7	7	5.5	1.60935		441500	9.1	4.5	3	5.53333	3.17857		441500	0.9	3.3	3.3	2.5	1.38564
	442000	1.1	1.1	1.7	1.3	0.34641		442000	2.1	3.1	4.3	3.16667	1.10151		442000	10.8	6.1	4.7	7.2	3.19531		442000	2.7	4.6	4.6	3.96667	1.09697
	442500	0.6	0.6	0.7	0.633333	0.057735		442500	3.5	3.6	6.7	4.6	1.81934		442500	15.9	11.9	9	12.2667	3.46458		442500	3.4	7.2	7.2	5.93333	2.19393
	443000	0.6	0.6	0.7	0.633333	0.057735		443000	2.8	2.8	4.3	3.3	0.866025		443000	7.5	7.5	3.9	6.3	2.07846		443000	1.2	2.5	2.5	2.06667	0.750555
	443500	0.7	0.7	0.6	0.666667	0.057735		443500	2.6	2.6	5.2	3.46667	1.50111		443500	8.9	4.5	3	5.46667	3.06649		443500	2.4	4	4	3.46667	0.92376
	444000	0.4	0.4	0.5	0.433333	0.057735		444000	2.9	2.9	4.4	3.4	0.866025		444000	11.4	11.4	5.7	9.5	3.2909		444000	9	10.8	9	9.6	1.03923
	444500	0.4	0.4	0.5	0.433333	0.057735		444500	6	6	8.6	6.86667	1.50111		444500	11.5	11.5	9.3	10.7667	1.27017		444500	2.8	2.8	2.8	2.8	5.43896e-16
	445000	0.4	0.4	0.5	0.433333	0.057735		445000	7.6	7.6	7.9	7.7	0.173205		445000	10.6	9.1	6	8.56667	2.34592		445000	1.5	1.5	1.5	1.5	0
	445500	0.4	0.4	0.9	0.566667	0.288675		445500	1.1	1.3	1.7	1.36667	0.305505		445500	13	11.7	7.8	10.8333	2.70617		445500	9.9	11	9.9	10.2667	0.635085
	446000	0.7	0.7	1.9	1.1	0.69282		446000	0.7	0.8	1.1	0.866667	0.208167		446000	11.9	11.9	6.8	10.2	2.94449		446000	3.8	7.6	7.6	6.33333	2.19393
	446500	5	5	5	5	0		446500	0.7	1.4	3.6	1.9	1.51327		446500	9.8	6.6	4.6	7	2.62298		446500	3.1	7.2	7.2	5.83333	2.36714
	447000	4.8	4.8	4.8	4.8	0		447000	1.2	2.3	4.5	2.66667	1.68028		447000	16.6	15.7	8.1	13.4667	4.6694		447000	5.9	13.8	13.8	11.1667	4.56107
	447500	5.3	5.3	3.9	4.83333	0.80829		447500	1.1	1.1	2.2	1.46667	0.635085		447500	13.5	10.1	6.7	10.1	3.4		447500	10.3	12	12	11.4333	0.981495
	448000	1.8	1.8	1.6	1.73333	0.11547		448000	1.8	1.8	4.5	2.7	1.55885		448000	15.8	12.3	7.1	11.7333	4.37759		448000	9.2	12.7	12.7	11.5333	2.02073
	448500	4.5	4.5	3.4	4.13333	0.635085		448500	2.6	2.6	4.3	3.16667	0.981495		448500	9.8	7.7	4.6	7.36667	2.61598		448500	3.4	5	3.4	3.93333	0.92376
	449000	36.5	36.6	38.5	37.2	1.12694		449000	5.5	5.5	5.5	5.5	0		449000	9.1	6.5	5.2	6.93333	1.98578		449000	6.9	8.6	5.8	7.1	1.41067
	449500	46.5	48.3	48.3	47.7	1.03923		449500	15.5	17	17	16.5	0.866025		449500	9	7.7	7.4	8.03333	0.85049		449500	5.8	9.4	9.4	8.2	2.07846
	450000	69.4	69.4	71.4	70.0667	1.1547		450000	31.7	31.7	31.7	31.7	0		450000	10.8	5	1.9	5.9	4.51774		450000	1.7	3.4	3.4	2.83333	0.981495
	450500	80	80	80	80	0		450500	29.2	29.2	31.2	29.8667	1.1547		450500	11.8	8.3	3.1	7.73333	4.37759		450500	2.3	4.3	3.2	3.26667	1.00167
	451000	74.1	78.1	80	77.4	3.01164		451000	23.9	23.9	25.8	24.5333	1.09697		451000	12.5	9.4	7.5	9.8	2.52389		451000	1.1	3.6	3.6	2.76667	1.44338
	451500	65.4	67.1	67.1	66.5333	0.981495		451500	25.2	25.2	25.2	25.2	0		451500	9.7	6.1	4.5	6.76667	2.66333		451500	0.9	2.8	2.8	2.16667	1.09697
	452000	60.2	60.2	60.2	60.2	8.70234e-15		452000	16.7	16.7	18.5	17.3	1.03923		452000	15.2	15.2	3.4	11.2667	6.81273		452000	1.3	2.9	1.5	1.9	0.87178
	452500	51.3	51.3	53.2	51.9333	1.09697		452500	17	17	18.9	17.6333	1.09697		452500	6.4	6.4	5	5.93333	0.80829		452500	1.7	1.9	0.7	1.43333	0.64291
	453000	44.1	44.1	44.1	44.1	0		453000	18.9	18.9	20.4	19.4	0.866025		453000	7.6	7.6	6.1	7.1	0.866025		453000	2.1	2.1	0.7	1.63333	0.80829
	453500	38.9	38.9	38.9	38.9	0		453500	8.8	8.8	8.8	8.8	0		453500	15.2	15.2	9.3	13.2333	3.40637		453500	3.2	3.2	0.9	2.43333	1.32791
	454000	33.3	33.3	33.3	33.3	0		454000	3.8	3.8	3.8	3.8	5.43896e-16		454000	23	19.2	8	16.7333	7.79829		454000	4	4	1.1	3.03333	1.67432
	454500	27.4	27.4	27.4	27.4	4.35117e-15		454500	6.2	6.2	7	6.46667	0.46188		454500	16.6	13.2	8.3	12.7	4.17253		454500	5.8	5.8	2.4	4.66667	1.96299
	455000	27.4	27.4	27.4	27.4	4.35117e-15		455000	6.7	6.7	8.4	7.26667	0.981495		455000	4.4	4.4	3	3.93333	0.80829		455000	3.2	4.8	3.6	3.86667	0.832666
	455500	24.4	24.4	26.2	25	1.03923		455500	9.2	10.5	11.8	10.5	1.3		455500	15.2	13.9	6	11.7	4.97896		455500	5.3	12.5	12.5	10.1	4.15692
	456000	14.7	14.7	14.7	14.7	2.17558e-15		456000	4.9	4.9	4.9	4.9	0		456000	14.9	13.1	5.6	11.2	4.93254		456000	8.7	8.7	7	8.13333	0.981495
	456500	18.7	18.7	18.7	18.7	0		456500	4.3	5.7	4.3	4.76667	0.80829		456500	8.9	7.8	4.9	7.2	2.0664		456500	7.1	12.1	10.9	10.0333	2.61024
	457000	11.1	11.1	9.2	10.4667	1.09697		457000	5	6.2	6	5.73333	0.64291		457000	5	4.3	1	3.43333	2.1362		457000	2.7	5.8	4.3	4.26667	1.55027
	457500	16.2	16.2	16.2	16.2	0		457500	2.2	3.7	5	3.63333	1.40119		457500	22.6	17.4	4.5	14.8333	9.31898		457500	2.7	3.1	1.5	2.43333	0.832666
	458000	12.8	12.8	12.8	12.8	2.17558e-15		458000	1.7	1.7	3.4	2.26667	0.981495		458000	10.6	10.6	6.6	9.26667	2.3094		458000	4.3	4.3	1.9	3.5	1.38564
	458500	13.1	13.1	13.1	13.1	0		458500	2.9	3.1	3.3	3.1	0.2		458500	10.9	10.9	7.6	9.8	1.90526		458500	0.9	2.3	2	1.73333	0.737111
	459000	7.9	7.9	9.2	8.33333	0.750555		459000	2.3	3.4	3.4	3.03333	0.635085		459000	14	14	6.4	11.4667	4.38786		459000	0.5	1.7	1.7	1.3	0.69282
	459500	17.1	17.1	17.1	17.1	0		459500	6.2	6.2	6.8	6.4	0.34641		459500	20.3	12.9	8.6	13.9333	5.91805		459500	0.5	2.4	2.4	1.76667	1.09697
	460000	28.3	28.3	28.3	28.3	0		460000	2	3.1	4.1	3.06667	1.0504		460000	17.4	15.4	11.6	14.8	2.94618		460000	0.7	2.1	2.1	1.63333	0.80829
	460500	19.4	19.4	22.9	20.5667	2.02073		460500	1.6	1.8	1.8	1.73333	0.11547		460500	6.8	6.8	5.4	6.33333	0.80829		460500	0.9	1.8	1.8	1.5	0.519615
	461000	8.1	8.1	8.1	8.1	0		461000	3	3	3	3	0		461000	15.3	11.5	6.5	11.1	4.41362		461000	0.9	1.3	1.3	1.16667	0.23094
	461500	7	7	7	7	0		461500	3.6	5.5	3.6	4.23333	1.09697		461500	9.4	3.8	1.9	5.03333	3.89915		461500	1.8	3	2.9	2.56667	0.665833
	462000	7.8	8.4	8.4	8.2	0.34641		462000	3.5	7	3.5	4.66667	2.02073		462000	17.1	11.2	4.4	10.9	6.35531		462000	2.5	4.9	2.5	3.3	1.38564
	462500	8.9	10.4	11.9	10.4	1.5		462500	5.8	6.4	5.8	6	0.34641		462500	7.4	5.9	4	5.76667	1.70392		462500	1	2.9	2.8	2.23333	1.06927
	463000	5.9	5.9	6.5	6.1	0.34641		463000	4.4	5.5	4.4	4.76667	0.635085		463000	13.8	8.6	6.9	9.76667	3.5949		463000	1.5	5.5	5.5	4.16667	2.3094
	463500	6.3	6.3	6.6	6.4	0.173205		463500	2.2	2.2	3.3	2.56667	0.635085		463500	11	11	8.5	10.1667	1.44338		463500	0.7	2.6	2.6	1.96667	1.09697
	464000	5.2	5.2	7.2	5.86667	1.1547		464000	6	6	7.5	6.5	0.866025		464000	16.3	14.5	10.8	13.8667	2.80416		464000	0.4	1.7	1.7	1.26667	0.750555
	464500	2.4	2.4	2.1	2.3	0.173205		464500	2.8	2.8	2.8	2.8	5.43896e-16		464500	8.1	6.8	5.1	6.66667	1.50444		464500	0.4	1.5	1.5	1.13333	0.635085
	465000	6.4	6.4	3.8	5.53333	1.50111		465000	2.6	2.6	3.5	2.9	0.519615		465000	12.7	8.5	4.2	8.46667	4.2501		465000	0.4	1	1	0.8	0.34641
	465500	7.3	7.3	7.3	7.3	0		465500	4.6	4.6	6	5.06667	0.80829		465500	12.2	10.9	6.1	9.73333	3.21299		465500	0.4	2.8	2.8	2	1.38564
	466000	4.7	4.7	4.7	4.7	0		466000	4.2	5.3	5.3	4.93333	0.635085		466000	10.6	10.6	6	9.06667	2.65581		466000	0.4	4.1	4.1	2.86667	2.1362
	466500	2.5	2.5	3.8	2.93333	0.750555		466500	3.1	3.1	3.1	3.1	0		466500	10.8	10.8	7.2	9.6	2.07846		466500	0.5	2	2	1.5	0.866025
	467000	4.6	4.6	7.3	5.5	1.55885		467000	4.4	4.4	5.5	4.76667	0.635085		467000	17.6	15.9	12.3	15.2667	2.70617		467000	0.5	3.2	3.2	2.3	1.55885
	467500	4.5	4.5	4.1	4.36667	0.23094		467500	5.6	5.6	9.2	6.8	2.07846		467500	6.8	6.8	3.9	5.83333	1.67432		467500	0.5	3.5	3.5	2.5	1.73205
	468000	5.5	5.5	4.4	5.13333	0.635085		468000	3.9	3.9	5.3	4.36667	0.80829		468000	13.6	12.1	8.5	11.4	2.62107		468000	0.6	1.7	1.7	1.33333	0.635085
	468500	5.3	5.3	5.3	5.3	0		468500	8.1	8.1	9.7	8.63333	0.92376		468500	18.6	15.5	7.4	13.8333	5.78302		468500	0.7	0.7	0.7	0.7	1.35974e-16
	469000	2.7	2.7	2.7	2.7	5.43896e-16		469000	2.8	2.8	2.8	2.8	5.43896e-16		469000	13.3	13.3	7.5	11.3667	3.34863		469000	2.5	2.8	1.9	2.4	0.458258
	469500	5.7	5.7	5.7	5.7	0		469500	10.9	11.9	10.9	11.2333	0.57735		469500	11.6	6.7	5.4	7.9	3.26956		469500	1	1.4	1.4	1.26667	0.23094
	470000	2.5	2.5	2.5	2.5	0		470000	2.3	2.3	2.3	2.3	0		470000	11.1	7.4	4.2	7.56667	3.45302		470000	2	3	2.9	2.63333	0.550757
	470500	6.2	6.2	6.2	6.2	0		470500	2.4	2.4	4.8	3.2	1.38564		470500	4.3	4.3	2.8	3.8	0.866025		470500	1.7	3.2	2.4	2.43333	0.750555
	471000	2.1	2.1	2.1	2.1	0		471000	1.2	1.2	3.6	2	1.38564		471000	10.4	8.1	5.7	8.06667	2.35018		471000	0.6	0.9	0.9	0.8	0.173205
	471500	2.2	2.2	2.2	2.2	0		471500	1.7	1.7	2.7	2.03333	0.57735		471500	13.2	9.9	5.5	9.53333	3.86307		471500	0.6	1.2	1.2	1	0.34641
	472000	4	4	5.3	4.43333	0.750555		472000	3.4	3.4	3.6	3.46667	0.11547		472000	12.3	10.7	6	9.66667	3.27465		472000	0.5	2.2	2.2	1.63333	0.981495
	472500	5.1	5.1	5.1	5.1	0		472500	3.2	3.2	4.8	3.73333	0.92376		472500	7.1	6.5	1.6	5.06667	3.01717		472500	0.5	1.8	1.8	1.36667	0.750555
	473000	5.1	5.1	5.1	5.1	0		473000	8.8	8.8	10.6	9.4	1.03923		473000	11.9	8.9	3.9	8.23333	4.04145		473000	0.5	1.9	1.9	1.43333	0.80829
	473500	6.8	6.8	6.8	6.8	0		473500	6.2	6.2	7.3	6.56667	0.635085		473500	14.9	14.9	7.6	12.4667	4.21466		473500	0.5	3.6	3.6	2.56667	1.78979
	474000	2.6	2.6	2.6	2.6	0		474000	1.5	2	2.9	2.13333	0.70946		474000	16.5	14.9	8.3	13.2333	4.34665		474000	0.7	7	7	4.9	3.63731
	474500	1.5	1.5	1.5	1.5	0		474500	1.1	3.4	1.2	1.9	1.3		474500	17.5	11.7	4.1	11.1	6.72012		474500	2	7.5	7.5	5.66667	3.17543
	475000	2.5	2.5	3.3	2.76667	0.46188		475000	1.3	2.5	1.3	1.7	0.69282		475000	7.3	7.3	5	6.53333	1.32791		475000	6	7.5	7.5	7	0.866025
	475500	2.5	2.5	2.7	2.56667	0.11547		475500	2.1	2.7	2.9	2.56667	0.416333		475500	10.2	10.2	8.8	9.73333	0.80829		475500	10.5	12	10.5	11	0.866025
	476000	3.5	3.5	3.5	3.5	0		476000	2.9	2.9	5.8	3.86667	1.67432		476000	12.4	11	5.5	9.63333	3.64737		476000	5	8.4	7.2	6.86667	1.72434
	476500	2.2	2.2	2.2	2.2	0		476500	2.1	2.1	4.3	2.83333	1.27017		476500	12.6	7.2	5.5	8.43333	3.7072		476500	1.4	2.8	2.8	2.33333	0.80829
	477000	2.6	2.6	2	2.4	0.34641		477000	2	2.2	2.6	2.26667	0.305505		477000	8.2	7.5	4.3	6.66667	2.07926		477000	3.9	6.3	6.3	5.5	1.38564
	477500	3.8	3.8	1.9	3.16667	1.09697		477500	4	5.3	5.3	4.86667	0.750555		477500	10.7	10.7	6.9	9.43333	2.19393		477500	9.2	9.2	7.7	8.7	0.866025
	478000	1.6	1.6	1.2	1.46667	0.23094		478000	3.9	4.9	3	3.93333	0.950438		478000	12.4	10	9.7	10.7	1.47986		478000	3.8	3.8	3.8	3.8	5.43896e-16
	478500	1	1	1.6	1.2	0.34641		478500	3	3	3	3	0		478500	16.3	13	11.4	13.5667	2.49867		478500	3.2	3.8	3.8	3.6	0.34641
	479000	2.2	2.2	3.2	2.53333	0.57735		479000	5.6	5.6	7	6.06667	0.80829		479000	7.9	7.9	4.7	6.83333	1.84752		479000	0.9	1.2	1.2	1.1	0.173205
	479500	5.9	5.9	6.7	6.16667	0.46188		479500	2.3	2.3	6.1	3.56667	2.19393		479500	8.3	6.9	3.6	6.26667	2.41316		479500	1.3	3.1	3.1	2.5	1.03923
	480000	3.3	3.3	5	3.86667	0.981495		480000	1.6	1.6	4.3	2.5	1.55885		480000	9.1	8.9	4.2	7.4	2.77308		480000	1	2.7	1.8	1.83333	0.85049
	480500	3.6	3.6	2.7	3.3	0.519615		480500	2.2	2.2	3.3	2.56667	0.635085		480500	13.6	9.1	6	9.56667	3.82143		480500	0.6	2	1.9	1.5	0.781025
	481000	2.2	2.2	1.1	1.83333	0.635085		481000	2.3	4.5	3.6	3.46667	1.10604		481000	16.1	14.6	8.8	13.1667	3.8553		481000	0.6	3.4	3.4	2.46667	1.61658
	481500	5.7	5.7	3.1	4.83333	1.50111		481500	1.3	2.7	2.7	2.23333	0.80829		481500	12.5	10.9	7.8	10.4	2.38956		481500	2.7	9.4	9.4	7.16667	3.86825
	482000	7.6	7.6	7.6	7.6	1.08779e-15		482000	3	5	5.1	4.36667	1.18462		482000	11.8	11.8	8.2	10.6	2.07846		482000	3.6	5.4	5.4	4.8	1.03923
	482500	4.3	4.3	5.7	4.76667	0.80829		482500	14.3	14.3	14.3	14.3	2.17558e-15		482500	6.8	6.8	4.1	5.9	1.55885		482500	0.6	1.6	1.6	1.26667	0.57735
	483000	8.6	8.6	7.5	8.23333	0.635085		483000	3.3	3.3	3.3	3.3	5.43896e-16		483000	16.7	13.4	7.2	12.4333	4.82321		483000	0.3	1.7	1.7	1.23333	0.80829
	483500	2.7	2.7	4	3.13333	0.750555		483500	3.7	3.7	3.7	3.7	5.43896e-16		483500	9.7	9.3	4.4	7.8	2.95127		483500	0.3	1.7	1.7	1.23333	0.80829
	484000	2	2	3.3	2.43333	0.750555		484000	2.5	3.3	2.8	2.86667	0.404145		484000	23.8	16.5	7.3	15.8667	8.26821		484000	0.3	1.1	1.1	0.833333	0.46188
	484500	3.8	3.8	3.6	3.73333	0.11547		484500	4.3	5.4	6.5	5.4	1.1		484500	14	10.9	8.5	11.1333	2.75741		484500	0.3	3.4	3.4	2.36667	1.78979
	485000	5.4	5.4	3.6	4.8	1.03923		485000	3.2	3.2	3.2	3.2	5.43896e-16		485000	11	8.2	6.3	8.5	2.36432		485000	0.3	3.2	2.8	2.1	1.57162
	485500	5.2	5.2	3.5	4.63333	0.981495		485500	8.5	8.5	9.9	8.96667	0.80829		485500	7.9	7.9	6.3	7.36667	0.92376		485500	0.5	4.5	3.7	2.9	2.1166
	486000	5.5	5.5	4	5	0.866025		486000	8.4	10.1	8.4	8.96667	0.981495		486000	11.1	7.4	5.6	8.03333	2.80416		486000	0.3	1.2	1.2	0.9	0.519615
	486500	3.3	3.3	3.3	3.3	5.43896e-16		486500	3.7	4.2	3.7	3.86667	0.288675		486500	12.2	9.9	4.1	8.73333	4.17413		486500	0.3	0.9	0.9	0.7	0.34641
	487000	2.6	2.6	2.5	2.56667	0.057735		487000	2.4	2.4	2.4	2.4	0		487000	13.4	10.4	3.1	8.96667	5.29748		487000	0.3	0.9	0.9	0.7	0.34641
	487500	4.8	4.8	3.6	4.4	0.69282		487500	9.5	9.5	9.5	9.5	0		487500	16.5	13.2	6.6	12.1	5.04083		487500	0.3	1.7	1.7	1.23333	0.80829
	488000	4.1	4.1	4.1	4.1	0		488000	7.2	8.7	7.2	7.7	0.866025		488000	5.1	5	5	5.03333	0.057735		488000	0.3	2.6	2.6	1.83333	1.32791
	488500	3.1	3.1	2.1	2.76667	0.57735		488500	3.5	4.7	3.5	3.9	0.69282		488500	10.5	9.5	7.1	9.03333	1.74738		488500	0.5	2.7	2.7	1.96667	1.27017
	489000	4.5	4.5	4.2	4.4	0.173205		489000	2.2	2.2	2.2	2.2	0		489000	15.6	10.9	5.8	10.7667	4.90136		489000	0.7	3.1	3.1	2.3	1.38564
	489500	7.1	7.1	7.1	7.1	1.08779e-15		489500	1.8	4	4.3	3.36667	1.36504		489500	9.2	9.2	6.2	8.2	1.73205		489500	0.7	3.2	3.2	2.36667	1.44338
	490000	5.7	5.7	5.3	5.56667	0.23094		490000	0.8	1.6	7.5	3.3	3.65923		490000	9.5	9.5	5.9	8.3	2.07846		490000	4.3	11.5	4.9	6.9	3.995
	490500	8.2	8.2	7	7.8	0.69282		490500	0.8	1.1	2.2	1.36667	0.737111		490500	10	9	6	8.33333	2.08167		490500	3.4	3.4	1.7	2.83333	0.981495
	491000	6	6	6	6	0		491000	1.3	3.4	1.9	2.2	1.08167		491000	7.7	4.4	4.2	5.43333	1.96554		491000	0.9	1.8	1.7	1.46667	0.493288
	491500	6.5	6.5	6.5	6.5	0		491500	7.4	7.8	8.6	7.93333	0.61101		491500	8.7	7.2	5.8	7.23333	1.45029		491500	0.6	2.7	2.7	2	1.21244
	492000	1.9	1.9	1.6	1.8	0.173205		492000	6.9	6.9	9.3	7.7	1.38564		492000	18.8	15	6.3	13.3667	6.40807		492000	0.6	2.3	2.3	1.73333	0.981495
	492500	1	1	0.8	0.933333	0.11547		492500	5.4	5.4	9	6.6	2.07846		492500	11.8	11.8	4.1	9.23333	4.4456		492500	0.5	3.5	3.5	2.5	1.73205
	493000	2.6	2.6	1.3	2.16667	0.750555		493000	2.8	4.2	2.8	3.26667	0.80829		493000	4.3	4.3	2.9	3.83333	0.80829		493000	0.4	1.1	1.1	0.866667	0.404145
	493500	1.8	1.8	1.8	1.8	0		493500	2	2.5	2	2.16667	0.288675		493500	10.8	7.2	6	8	2.498		493500	0.4	0.7	0.7	0.6	0.173205
	494000	1.8	1.6	1.6	1.66667	0.11547		494000	2.4	2.4	2.4	2.4	0		494000	4.8	4.8	4.3	4.63333	0.288675		494000	0.4	1.2	1.2	0.933333	0.46188
	494500	4	2.6	2.6	3.06667	0.80829		494500	5.7	5.7	5.7	5.7	0		494500	21.3	19.4	13.6	18.1	4.01123		494500	0.8	4.4	4.4	3.2	2.07846
	495000	4.1	4.1	4.1	4.1	0		495000	3.9	5.2	5.2	4.76667	0.750555		495000	15.2	13.4	5.7	11.4333	5.04612		495000	0.9	1.6	1.6	1.36667	0.404145
	495500	6	6	5.3	5.76667	0.404145		495500	2.5	3.2	3.3	3	0.43589		495500	14.8	14.8	7.2	12.2667	4.38786		495500	0.5	0.6	0.6	0.566667	0.057735
	496000	3.3	3.3	4.9	3.83333	0.92376		496000	2.4	3.7	3.7	3.26667	0.750555		496000	15.7	14	7	12.2333	4.61122		496000	0.5	0.6	0.6	0.566667	0.057735
	496500	3.1	3.1	4.1	3.43333	0.57735		496500	2	2.6	3	2.53333	0.503322		496500	15.2	13.3	10.8	13.1	2.20681		496500	0.5	1	1	0.833333	0.288675
	497000	7.9	7.9	7.9	7.9	1.08779e-15		497000	2	2	2.3	2.1	0.173205		497000	11.2	9.3	5.3	8.6	3.01164		497000	1.3	7.8	7.8	5.63333	3.75278
	497500	2.8	2.8	2.8	2.8	5.43896e-16		497500	3.1	3.1	4.9	3.7	1.03923		497500	13.8	9.3	8.1	10.4	3.005		497500	2.7	4.5	4.4	3.86667	1.0116
	498000	3.2	3.2	3.1	3.16667	0.057735		498000	1.9	1.9	2.9	2.23333	0.57735		498000	14.1	9.9	4.6	9.53333	4.7606		498000	2.2	2.6	1.7	2.16667	0.450925
	498500	6.7	6.7	5.4	6.26667	0.750555		498500	3.1	3.1	3.1	3.1	0		498500	10.8	10.2	3.5	8.16667	4.05257		498500	2.5	2.5	2.5	2.5	0
	499000	3.3	3.3	4.9	3.83333	0.92376		499000	8.6	10.1	10.1	9.6	0.866025		499000	18.1	9.9	3.1	10.3667	7.51088		499000	6.8	8.7	7.6	7.7	0.953939
	499500	5	5	5.1	5.03333	0.057735		499500	3.1	3.1	4.9	3.7	1.03923		499500	15.3	10	3.8	9.7	5.75587		499500	1.7	5.1	5.1	3.96667	1.96299
	500000	1.7	1.7	1.4	1.6	0.173205		500000	1.9	1.9	5.5	3.1	2.07846		500000	11.9	11.5	6.2	9.86667	3.18172		500000	1.4	2.3	1.7	1.8	0.458258
	500500	1.9	1.9	1.9	1.9	2.71948e-16		500500	3.4	3.8	6.8	4.66667	1.85831		500500	18.2	14.9	6	13.0333	6.31057		500500	0.7	0.8	0.8	0.766667	0.057735
	501000	1.1	1.1	1.6	1.26667	0.288675		501000	1.1	1.3	2.2	1.53333	0.585947		501000	5.9	5.9	4.6	5.46667	0.750555		501000	0.7	0.8	0.8	0.766667	0.057735
	501500	2.7	2.7	3.7	3.03333	0.57735		501500	2.5	3.1	4.3	3.3	0.916515		501500	10.2	10.2	5.1	8.5	2.94449		501500	4	6.5	6.5	5.66667	1.44338
	502000	1.5	1.5	1.5	1.5	0		502000	1.8	1.8	1.9	1.83333	0.057735		502000	14.9	13.6	6.8	11.7667	4.3501		502000	1.2	2.9	2.9	2.33333	0.981495
	502500	3.2	3.2	3.9	3.43333	0.404145		502500	3.6	3.6	3.6	3.6	0		502500	12.9	12.9	7.3	11.0333	3.23316		502500	0.6	1.2	0.9	0.9	0.3
	503000	5.1	5.1	5.1	5.1	0		503000	5.6	6.5	6.5	6.2	0.519615		503000	20.3	14.8	9.2	14.7667	5.55008		503000	0.6	1	0.6	0.733333	0.23094
	503500	3.6	3.6	3.6	3.6	0		503500	1.3	1.3	1.3	1.3	0		503500	10.4	8.6	6.4	8.46667	2.00333		503500	0.9	1.2	0.6	0.9	0.3
	504000	4.7	4.7	4.7	4.7	0		504000	3.3	3.3	4.1	3.56667	0.46188		504000	16.6	10.1	5	10.5667	5.81406		504000	3.9	4.6	2	3.5	1.34536
	504500	6.9	6.9	8.7	7.5	1.03923		504500	6	7.5	7.5	7	0.866025		504500	20.9	14.4	9	14.7667	5.95847		504500	1.2	1.3	1.3	1.26667	0.057735
	505000	5.1	6.8	6.8	6.23333	0.981495		505000	1.7	1.9	1.7	1.76667	0.11547		505000	15.7	9.6	4.7	10	5.5109		505000	1.4	1.5	1.5	1.46667	0.057735
	505500	2.7	2.8	2.8	2.76667	0.057735		505500	5.6	6.7	5.6	5.96667	0.635085		505500	11.8	10.3	6.2	9.43333	2.89885		505500	3.6	3.6	3.6	3.6	0
	506000	4	4	3.7	3.9	0.173205		506000	6.8	9.9	9.6	8.76667	1.70978		506000	11.4	8.2	4.4	8	3.50428		506000	1.7	1.7	1.7	1.7	0
	506500	3.4	3.4	2.3	3.03333	0.635085		506500	1.5	2.2	3.4	2.36667	0.960902		506500	12.9	11	5.5	9.8	3.84318		506500	3	4.4	3.7	3.7	0.7
	507000	0.9	0.9	1.8	1.2	0.519615		507000	1.1	1.1	2.3	1.5	0.69282		507000	16.3	14.9	13.4	14.8667	1.45029		507000	1.9	2.7	2.7	2.43333	0.46188
	507500	0.6	0.6	1.4	0.866667	0.46188		507500	1.9	1.9	3.1	2.3	0.69282		507500	11.5	9.8	5.8	9.03333	2.92632		507500	13.1	13.1	13.1	13.1	0
	508000	0.6	0.6	1.2	0.8	0.34641		508000	1.8	1.8	4.4	2.66667	1.50111		508000	5.3	4.1	3.1	4.16667	1.10151		508000	4.5	6	6	5.5	0.866025
	508500	0.6	0.6	1	0.733333	0.23094		508500	1.9	1.9	3.9	2.56667	1.1547		508500	14.6	9.7	4.9	9.73333	4.85009		508500	2.5	3.1	3.1	2.9	0.34641
	509000	1.1	1.1	1.5	1.23333	0.23094		509000	7.5	7.5	9.4	8.13333	1.09697		509000	7.2	7.2	3.5	5.96667	2.1362		509000	0.6	0.6	0.6	0.6	0
	509500	1.8	1.8	1.9	1.83333	0.057735		509500	5.5	5.7	8.9	6.7	1.90788		509500	25.3	21.1	8.5	18.3	8.743		509500	0.6	0.6	0.6	0.6	0
	510000	4.2	4.2	5.7	4.7	0.866025		510000	4.3	5.5	16.4	8.73333	6.66658		510000	11.9	11.9	8.5	10.7667	1.96299		510000	1	1	1	1	0
	510500	1.6	1.4	1.4	1.46667	0.11547		510500	1.5	1.7	3	2.06667	0.814453		510500	11.6	10.1	8	9.9	1.80831		510500	3	7.6	5.7	5.43333	2.31157
	511000	1	0.9	0.9	0.933333	0.057735		511000	4.6	5.6	5.8	5.33333	0.64291		511000	15.7	13.7	10.6	13.3333	2.5697		511000	1.1	4.5	4.5	3.36667	1.96299
	511500	2	1.5	1.5	1.66667	0.288675		511500	3.1	3.1	7.7	4.63333	2.65581		511500	15.4	10	6.7	10.7	4.39204		511500	1.6	2.3	2.3	2.06667	0.404145
	512000	1.2	1.2	1.2	1.2	0		512000	0.9	0.9	1.8	1.2	0.519615		512000	14.5	10.9	4.9	10.1	4.84974		512000	0.8	1.8	1.8	1.46667	0.57735
	512500	2	2	2.6	2.2	0.34641		512500	0.9	0.9	1	0.933333	0.057735		512500	6.7	6.4	2.6	5.23333	2.28546		512500	0.5	2.2	2.2	1.63333	0.981495
	513000	1.8	1.8	2.2	1.93333	0.23094		513000	2.5	3.1	3.4	3	0.458258		513000	13.9	11.1	5	10	4.55082		513000	0.5	1.5	1.5	1.16667	0.57735
	513500	3.3	3.3	3.3	3.3	5.43896e-16		513500	2.9	3.1	4.8	3.6	1.04403		513500	14.7	12.9	7.4	11.6667	3.80307		513500	0.5	0.8	0.8	0.7	0.173205
	514000	2.6	2.6	3.6	2.93333	0.57735		514000	3.5	4.7	3.5	3.9	0.69282		514000	16.8	15.2	9.5	13.8333	3.8371		514000	1.2	1.8	1.2	1.4	0.34641
	514500	4.5	4.5	3.3	4.1	0.69282		514500	2.5	2.8	2.5	2.6	0.173205		514500	8.3	8.3	6.5	7.7	1.03923		514500	0.5	2.6	2.6	1.9	1.21244
	515000	7.2	7.2	7.2	7.2	0		515000	2.9	3.9	3.9	3.56667	0.57735		515000	7.3	7.3	3.4	6	2.25167		515000	0.3	2.6	2.6	1.83333	1.32791
	515500	3.1	3.1	3.1	3.1	0		515500	8.2	8.2	9.8	8.73333	0.92376		515500	11	9.2	3.1	7.76667	4.14045		515500	0.3	5.1	5.1	3.5	2.77128
	516000	1.7	1.7	1.7	1.7	0		516000	7.5	7.5	8.3	7.76667	0.46188		516000	13.7	12	2.4	9.36667	6.09289		516000	0.3	3	3	2.1	1.55885
	516500	2.7	2.7	2.7	2.7	5.43896e-16		516500	3	3	3	3	0		516500	15.2	11.1	6.6	10.9667	4.30155		516500	0.3	2	2	1.43333	0.981495
	517000	7.5	7.5	7.5	7.5	0		517000	2.1	2.1	2.1	2.1	0		517000	15.9	13.9	5.4	11.7333	5.57524		517000	0.3	1	1	0.766667	0.404145
	517500	5	5	4.3	4.76667	0.404145		517500	5.5	5.5	7.4	6.13333	1.09697		517500	13.3	10	3.1	8.8	5.20481		517500	0.3	2	1.9	1.4	0.953939
	518000	1.8	1.8	1.4	1.66667	0.23094		518000	4.1	8.2	8.3	6.86667	2.39653		518000	11.9	6.9	3.3	7.36667	4.31895		518000	0.5	3.5	2.3	2.1	1.50997
	518500	3.2	3.2	2.4	2.93333	0.46188		518500	1.2	3.7	2.5	2.46667	1.25033		518500	7.2	6.4	6.1	6.56667	0.568624		518500	2.2	2.3	2.3	2.26667	0.057735
	519000	5	5	3	4.33333	1.1547		519000	2.7	4.4	3.1	3.4	0.888819		519000	13.7	13.7	5.5	10.9667	4.73427		519000	1.9	2.1	2.1	2.03333	0.11547
	519500	1.8	1.8	1.6	1.73333	0.11547		519500	2.7	2.7	4.1	3.16667	0.80829		519500	16.9	10.9	6.5	11.4333	5.22047		519500	5.9	8.9	8.9	7.9	1.73205
	520000	1.6	1.6	1.6	1.6	2.71948e-16		520000	6.3	6.3	7.1	6.56667	0.46188		520000	7.6	5.3	5.3	6.06667	1.32791		520000	12.9	12.9	12.9	12.9	0
	520500	2.7	2.7	2.7	2.7	5.43896e-16		520500	5.4	5.4	5.4	5.4	1.08779e-15		520500	18.5	13.4	10.1	14	4.23202		520500	8.7	10.4	8.7	9.26667	0.981495
	521000	4	3.8	3.8	3.86667	0.11547		521000	3	3	4	3.33333	0.57735		521000	5.5	5.5	5.5	5.5	0		521000	2.6	5	5	4.2	1.38564
	521500	6.4	5.3	5.2	5.63333	0.665833		521500	2.1	2.1	4.2	2.8	1.21244		521500	12.2	10.1	4.3	8.86667	4.09186		521500	1.7	2.5	2	2.06667	0.404145
	522000	7.2	7.2	4.3	6.23333	1.67432		522000	1.5	1.5	1.6	1.53333	0.057735		522000	17.1	15.4	7.6	13.3667	5.0659		522000	0.9	0.7	0.7	0.766667	0.11547
	522500	7.8	7.8	7.8	7.8	0		522500	1.8	1.9	1.8	1.83333	0.057735		522500	11.3	8.4	5	8.23333	3.15331		522500	0.6	0.7	0.7	0.666667	0.057735
	523000	4.3	4.3	4.3	4.3	0		523000	1.7	3.4	1.7	2.26667	0.981495		523000	16.6	11.9	8.4	12.3	4.11461		523000	0.6	0.9	0.9	0.8	0.173205
	523500	3	3	3	3	0		523500	3.1	5.5	3.9	4.16667	1.22202		523500	13.4	11.9	7.4	10.9	3.1225		523500	2.2	4.2	3.2	3.2	1
	524000	5.4	5.4	5.4	5.4	1.08779e-15		524000	2.5	2.5	5	3.33333	1.44338		524000	13.9	10.4	8.7	11	2.65141		524000	9.6	10.1	8.4	9.36667	0.873689
	524500	2.4	2.4	2.4	2.4	0		524500	4	4	5.4	4.46667	0.80829		524500	12.7	10.7	8.6	10.6667	2.0502		524500	2.8	6.1	4.9	4.6	1.67033
	525000	3.3	3.3	3.3	3.3	5.43896e-16		525000	1.2	1.2	1.3	1.23333	0.057735		525000	8.8	8.8	6.3	7.96667	1.44338		525000	1	2	2	1.66667	0.57735
	525500	3.9	3.9	3.9	3.9	0		525500	3.4	3.4	5.1	3.96667	0.981495		525500	2.9	2.9	2.9	2.9	0		525500	1.2	3.4	1.7	2.1	1.15326
	526000	7.5	7.5	9	8	0.866025		526000	5.3	6.3	6.3	5.96667	0.57735		526000	3.1	3.1	2.9	3.03333	0.11547		526000	0.4	1.2	1.1	0.9	0.43589
	526500	5.3	5.3	5.4	5.33333	0.057735		526500	2.6	2.6	2.6	2.6	0		526500	8.4	7	4.2	6.53333	2.13854		526500	0.4	1.8	1.6	1.26667	0.757188
	527000	5.1	5.1	5.1	5.1	0		527000	3.2	3.2	4.8	3.73333	0.92376		527000	21	14.4	6.9	14.1	7.05479		527000	0.4	3.8	3.8	2.66667	1.96299
	527500	5	5	5	5	0		527500	2.9	2.9	4	3.26667	0.635085		527500	10.9	5.5	3.5	6.63333	3.82797		527500	0.4	2.8	2.8	2	1.38564
	528000	5.8	5.8	4.6	5.4	0.69282		528000	1.9	1.9	1.9	1.9	2.71948e-16		528000	22.6	15.8	9.7	16.0333	6.45316		528000	2.2	9.8	8.2	6.73333	4.00666
	528500	2.3	2.3	1.2	1.93333	0.635085		528500	4.7	4.7	4.7	4.7	0		528500	18.5	12	8.3	12.9333	5.16366		528500	10.2	12.7	10.9	11.2667	1.2897
	529000	4.2	4.2	1.9	3.43333	1.32791		529000	4	4.8	4	4.26667	0.46188		529000	15.2	12.2	9.1	12.1667	3.05014		529000	4.7	5.7	5.7	5.36667	0.57735
	529500	5.7	5.7	5.7	5.7	0		529500	1.5	1.5	1.5	1.5	0		529500	20	18.6	13.9	17.5	3.19531		529500	1.3	1.3	1.3	1.3	0
	530000	6.4	6.4	5.1	5.96667	0.750555		530000	3	3	3	3	0		530000	18.3	13.3	9	13.5333	4.65439		530000	4.9	7.5	5.8	6.06667	1.32035
	530500	7.5	7.5	5.4	6.8	1.21244		530500	6.7	6.7	8.4	7.26667	0.981495		530500	24.6	17.9	16.1	19.5333	4.47921		530500	2.1	5.1	3.8	3.66667	1.50444
	531000	9	9	9.1	9.03333	0.057735		531000	3.5	4.7	4.7	4.3	0.69282		531000	19.2	13.7	9.8	14.2333	4.72264		531000	2.4	4	3.3	3.23333	0.802081
	531500	7.2	7.2	8.7	7.7	0.866025		531500	2.1	2.9	2.3	2.43333	0.416333		531500	12.3	10.5	3.8	8.86667	4.47921		531500	0.9	1.2	1.2	1.1	0.173205
	532000	12.8	11	11	11.6	1.03923		532000	7.9	7.9	7.4	7.73333	0.288675		532000	15.3	13.4	8.3	12.3333	3.61985		532000	1.4	3.2	3.1	2.56667	1.0116
	532500	10.5	8.8	8.8	9.36667	0.981495		532500	1.3	1.3	1.4	1.33333	0.057735		532500	20.9	14.9	11.8	15.8667	4.62637		532500	9.3	14.1	11	11.4667	2.43379
	533000	1.4	1.4	2.1	1.63333	0.404145		533000	5.4	5.4	6.3	5.7	0.519615		533000	16.1	16.1	7.2	13.1333	5.13842		533000	3.7	6.5	5.9	5.36667	1.47422
	533500	0.8	0.8	1	0.866667	0.11547		533500	4.7	4.7	5.9	5.1	0.69282		533500	8.8	8.8	6	7.86667	1.61658		533500	1.5	1.5	1.3	1.43333	0.11547
	534000	0.9	0.9	1.1	0.966667	0.11547		534000	3.1	4.7	6.3	4.7	1.6		534000	9.9	9.9	7.9	9.23333	1.1547		534000	2.3	2.3	1.6	2.06667	0.404145
	534500	1.1	1.1	1.1	1.1	0		534500	5.9	7.7	7.5	7.03333	0.986577		534500	18.8	12.1	7.3	12.7333	5.7761		534500	5.1	7.1	3.5	5.23333	1.8037
	535000	1.4	1.4	1.4	1.4	2.71948e-16		535000	2.1	2.1	2.1	2.1	0		535000	12.2	11.2	5.6	9.66667	3.55715		535000	1.4	1.8	0.9	1.36667	0.450925
	535500	6.8	6.8	5.8	6.46667	0.57735		535500	2.2	2.2	3.3	2.56667	0.635085		535500	14.4	9.6	9.6	11.2	2.77128		535500	1	1	0.9	0.966667	0.057735
	536000	3.3	3.3	2.4	3	0.519615		536000	3	3	4.1	3.36667	0.635085		536000	12.8	7.4	7.4	9.2	3.11769		536000	1.5	4.3	2.6	2.8	1.41067
	536500	1.3	1.3	1.2	1.26667	0.057735		536500	3.8	4.4	3.3	3.83333	0.550757		536500	10.9	9.4	6.3	8.86667	2.34592		536500	0.6	3.2	3.2	2.33333	1.50111
	537000	3.3	2.6	2	2.63333	0.650641		537000	1.4	1.4	1.4	1.4	2.71948e-16		537000	14.1	13.6	6.3	11.3333	4.36616		537000	0.6	1.4	1.4	1.13333	0.46188
	537500	3.2	3	3.5	3.23333	0.251661		537500	1.9	1.9	1.9	1.9	2.71948e-16		537500	10.5	8.6	7.6	8.9	1.47309		537500	0.4	3.5	2.6	2.16667	1.59478
	538000	9.4	9.4	10.9	9.9	0.866025		538000	3.3	4.4	3.3	3.66667	0.635085		538000	7.1	5.9	4.7	5.9	1.2		538000	0.3	3.3	3.3	2.3	1.73205
	538500	4.6	4.6	2.9	4.03333	0.981495		538500	2.6	3.8	3.9	3.43333	0.723418		538500	7.4	6.7	3	5.7	2.36432		538500	0.3	1	1	0.766667	0.404145
	539000	1.6	1.6	0.8	1.33333	0.46188		539000	1.1	1.2	2.2	1.5	0.608276		539000	15.2	11.2	6.3	10.9	4.45758		539000	0.3	0.8	0.8	0.633333	0.288675
	539500	2.4	2.4	0.8	1.86667	0.92376		539500	3	3.3	4.7	3.66667	0.907377		539500	5.1	5.1	5.1	5.1	0		539500	0.3	0.7	0.7	0.566667	0.23094
	540000	4.4	5.8	2.5	4.23333	1.6563		540000	1.2	2.4	1.4	1.66667	0.64291		540000	15.1	11	4	10.0333	5.61278		540000	0.3	0.7	0.7	0.566667	0.23094
	540500	5.4	5.4	5.4	5.4	1.08779e-15		540500	1.8	4.4	2.7	2.96667	1.32035		540500	9.4	9.4	5.4	8.06667	2.3094		540500	1.7	3.5	3	2.73333	0.929157
	541000	1.8	1.8	1.8	1.8	0		541000	1.8	2.3	2.1	2.06667	0.251661		541000	9.5	8.1	4.9	7.5	2.35797		541000	1.1	3.4	3.4	2.63333	1.32791
	541500	1.8	1.8	1.8	1.8	0		541500	3.7	5.5	4.6	4.6	0.9		541500	4.7	4.1	1.2	3.33333	1.87172		541500	1	2.3	2.3	1.86667	0.750555
	542000	3.5	3.5	3.5	3.5	0		542000	3.1	3.7	4.6	3.8	0.754983		542000	14.2	4.3	0.8	6.43333	6.95006		542000	0.8	2.4	2.4	1.86667	0.92376
	542500	3.1	3.1	3.1	3.1	0		542500	7.7	7.7	9	8.13333	0.750555		542500	7	4	0.8	3.93333	3.10054		542500	0.8	2.9	2.5	2.06667	1.11505
	543000	2.7	2.7	2.7	2.7	5.43896e-16		543000	5.3	6.4	6.4	6.03333	0.635085		543000	9.6	7.5	3.2	6.76667	3.26241		543000	2.6	5.8	5	4.46667	1.66533
	543500	6.6	6.6	7.9	7.03333	0.750555		543500	7.8	7.8	7.8	7.8	0		543500	14	10.9	4.6	9.83333	4.78992		543500	1.1	2.3	2.3	1.9	0.69282
	544000	2	2	2.4	2.13333	0.23094		544000	3.5	3.5	3.5	3.5	0		544000	13.4	8.4	4	8.6	4.70319		544000	1.5	7.1	7.1	5.23333	3.23316
	544500	1.9	1.9	1.9	1.9	2.71948e-16		544500	3.8	3.8	3.8	3.8	5.43896e-16		544500	6	6	2.8	4.93333	1.84752		544500	2.2	2.5	2.5	2.4	0.173205
	545000	1.1	1.1	1.1	1.1	0		545000	1.7	1.7	3.7	2.36667	1.1547		545000	15	13.3	6.7	11.6667	4.38444		545000	1.1	1.1	1.1	1.1	0
	545500	1.7	1.7	1.7	1.7	0		545500	1.2	1.3	4.5	2.33333	1.87705		545500	6.7	6.7	2.7	5.36667	2.3094		545500	1.4	1.4	1.4	1.4	2.71948e-16
	546000	2	2	2	2	0		546000	1.3	1.4	1.3	1.33333	0.057735		546000	13.8	10.4	3.8	9.33333	5.08462		546000	0.8	0.8	0.8	0.8	1.35974e-16
	546500	3.2	3.2	2.1	2.83333	0.635085		546500	1.7	2.6	2.6	2.3	0.519615		546500	6.3	6.3	4.4	5.66667	1.09697		546500	0.7	0.9	0.9	0.833333	0.11547
	547000	2.5	2.5	2.5	2.5	0		547000	5	5	5	5	0		547000	10.5	10.5	6.6	9.2	2.25167		547000	0.5	0.9	0.9	0.766667	0.23094
	547500	1.3	1.3	1.3	1.3	0		547500	17.1	18.8	17.1	17.6667	0.981495		547500	17.9	16.1	9.9	14.6333	4.19682		547500	0.5	2.1	2.1	1.56667	0.92376
	548000	0.7	0.7	0.5	0.633333	0.11547		548000	4.4	4.4	5.9	4.9	0.866025		548000	20.3	15.6	8.4	14.7667	5.99361		548000	0.5	6	6	4.16667	3.17543
	548500	0.9	0.9	0.5	0.766667	0.23094		548500	1.5	1.9	3.7	2.36667	1.17189		548500	6	6	4.8	5.6	0.69282		548500	0.5	1.6	1.6	1.23333	0.635085
	549000	1.3	1.3	0.5	1.03333	0.46188		549000	2	3.3	4.7	3.33333	1.35031		549000	3.8	3.8	2.1	3.23333	0.981495		549000	0.5	1.1	1.1	0.9	0.34641
	549500	1.9	1.9	0.7	1.5	0.69282		549500	3.8	5	5.2	4.66667	0.757188		549500	12.1	6	3	7.03333	4.63717		549500	0.5	1.3	1.3	1.03333	0.46188
	550000	1.3	1.3	1.2	1.26667	0.057735		550000	3.1	3.1	5.3	3.83333	1.27017		550000	12	8.7	4.5	8.4	3.75899		550000	0.5	2.9	2.9	2.1	1.38564
	550500	2.6	2.6	2.5	2.56667	0.057735		550500	4.5	4.5	6.5	5.16667	1.1547		550500	13.7	6.9	2.2	7.6	5.78187		550500	1	5.8	5.8	4.2	2.77128
	551000	1	1	1	1	0		551000	2.4	2.4	3.6	2.8	0.69282		551000	13.5	5.4	1.9	6.93333	5.95007		551000	0.6	2.8	2.8	2.06667	1.27017
	551500	1.4	1.4	2.1	1.63333	0.404145		551500	2.5	2.5	3.4	2.8	0.519615		551500	12.3	9.2	7.3	9.6	2.52389		551500	0.6	1	1	0.866667	0.23094
	552000	2.3	2.3	1.6	2.06667	0.404145		552000	1.8	1.8	1.8	1.8	0		552000	15.6	12.5	9.3	12.4667	3.15013		552000	0.6	2.7	2.7	2	1.21244
	552500	2.5	2.5	1.3	2.1	0.69282		552500	1.4	1.4	1.4	1.4	2.71948e-16		552500	9.3	9.3	3.5	7.36667	3.34863		552500	2.6	5.3	4.3	4.06667	1.36504
	553000	3.6	3.6	2.5	3.23333	0.635085		553000	2.8	2.8	2.8	2.8	5.43896e-16		553000	12.7	12.7	8.6	11.3333	2.36714		553000	5.6	6.7	5.6	5.96667	0.635085
	553500	4.5	5.6	5.6	5.23333	0.635085		553500	7.5	7.5	7.5	7.5	0		553500	12.5	11.3	9.9	11.2333	1.30128		553500	2.9	2.9	2.9	2.9	0
	554000	6.4	6.2	6.2	6.26667	0.11547		554000	3	3.8	4.5	3.76667	0.750555		554000	10.1	7.2	3	6.76667	3.56978		554000	2	3	3	2.66667	0.57735
	554500	15	13.2	13.2	13.8	1.03923		554500	1	1	3	1.66667	1.1547		554500	14.7	9.2	4.8	9.56667	4.96017		554500	2.2	3.6	3.6	3.13333	0.80829
	555000	6.6	6.6	6.6	6.6	1.08779e-15		555000	4.7	4.7	9.2	6.2	2.59808		555000	10.1	8.4	6.7	8.4	1.7		555000	1.2	2.6	2.6	2.13333	0.80829
	555500	1.7	1.7	2.2	1.86667	0.288675		555500	7.4	7.4	9.3	8.03333	1.09697		555500	22.5	11.2	4.8	12.8333	8.96233		555500	0.9	1.9	1.9	1.56667	0.57735
	556000	0.9	0.9	1.1	0.966667	0.11547		556000	4.5	6.1	4.5	5.03333	0.92376		556000	11	10.7	6	9.23333	2.80416		556000	1.3	3.4	3.4	2.7	1.21244
	556500	1.6	1.6	1.9	1.7	0.173205		556500	6.4	8.6	6.4	7.13333	1.27017		556500	10.8	8.1	5.4	8.1	2.7		556500	3.7	5.6	5.5	4.93333	1.06927
	557000	10.9	10.9	9.3	10.3667	0.92376		557000	5.3	5.3	5.3	5.3	0		557000	8	8	3.7	6.56667	2.48261		557000	10.2	11.4	8.9	10.1667	1.25033
	557500	2.2	2.2	1.4	1.93333	0.46188		557500	5.3	5.3	5.3	5.3	0		557500	3.7	3.7	2.4	3.26667	0.750555		557500	3.9	8	8	6.63333	2.36714
	558000	0.8	0.8	0.8	0.8	1.35974e-16		558000	4.2	5.2	6.3	5.23333	1.0504		558000	7.5	7.5	1.9	5.63333	3.23316		558000	1.2	2.6	2.6	2.13333	0.80829
	558500	1.6	1.6	1.1	1.43333	0.288675		558500	2.4	3.4	4.6	3.46667	1.10151		558500	11.1	5.5	2.9	6.5	4.19047		558500	1.4	1.8	1.8	1.66667	0.23094
	559000	2.9	2.9	1.6	2.46667	0.750555		559000	0.8	1.4	1.7	1.3	0.458258		559000	15.3	9.6	9.6	11.5	3.2909		559000	2.2	3.3	2.2	2.56667	0.635085
	559500	2.9	2.9	1.4	2.4	0.866025		559500	0.8	1.7	1.3	1.26667	0.450925		559500	10.9	10.9	9.3	10.3667	0.92376		559500	2.6	2.8	1.4	2.26667	0.757188
	560000	3.2	3.2	1.4	2.6	1.03923		560000	1.6	2.6	3.3	2.5	0.8544		560000	6.8	6.8	6.8	6.8	0		560000	1.2	1.8	1.5	1.5	0.3
	560500	5.3	5.3	2.4	4.33333	1.67432		560500	1.7	2.6	2.9	2.4	0.6245		560500	14.4	8.1	4.7	9.06667	4.92172		560500	0.8	1.7	1.7	1.4	0.519615
	561000	4.2	4.2	4.2	4.2	0		561000	4.5	5.9	5.7	5.36667	0.757188		561000	22.4	13.4	5.3	13.7	8.55395		561000	1.9	3.7	3.7	3.1	1.03923
	561500	3.8	3.8	4.2	3.93333	0.23094		561500	4.4	4.4	4.5	4.43333	0.057735		561500	11.8	11.8	8.5	10.7	1.90526		561500	1.1	1.8	1.8	1.56667	0.404145
	562000	3.8	3.8	4.7	4.1	0.519615		562000	9.7	9.7	12.1	10.5	1.38564		562000	11.5	10.1	3.5	8.36667	4.27239		562000	3.3	6.1	6.1	5.16667	1.61658
	562500	2.9	2.9	2.9	2.9	0		562500	9.2	9.8	9.2	9.4	0.34641		562500	11.6	8.7	3.8	8.03333	3.9425		562500	0.8	2.7	2.7	2.06667	1.09697
	563000	7.9	7.9	7.9	7.9	1.08779e-15		563000	2.4	3.6	2.4	2.8	0.69282		563000	21	12.8	7	13.6	7.0342		563000	0.8	2.8	2.1	1.9	1.01489
	563500	7.5	7.5	7.5	7.5	0		563500	3.1	3.3	4.7	3.7	0.87178		563500	13.9	7.7	5.4	9	4.39659		563500	1.8	4.5	3.4	3.23333	1.35769
	564000	5.2	5.2	5.2	5.2	0		564000	1.4	1.5	2.8	1.9	0.781025		564000	11.1	3.2	3.2	5.83333	4.56107		564000	4.3	4.3	2.6	3.73333	0.981495
	564500	4.2	4.2	4.2	4.2	0		564500	1.4	2.1	2.2	1.9	0.43589		564500	10.5	8.3	8.3	9.03333	1.27017		564500	3.3	3.3	1.5	2.7	1.03923
	565000	3.3	3.3	3.3	3.3	5.43896e-16		565000	4.2	4.2	6.7	5.03333	1.44338		565000	7.7	7.7	6.4	7.26667	0.750555		565000	7.7	8.7	5.4	7.26667	1.69214
	565500	6.5	6.5	6.5	6.5	0		565500	2.1	2.1	5.3	3.16667	1.84752		565500	8.1	6.5	6.5	7.03333	0.92376		565500	4.2	5.6	3.5	4.43333	1.06927
	566000	2.9	2.9	4.4	3.4	0.866025		566000	2	2	2.8	2.26667	0.46188		566000	12.3	12.3	7.2	10.6	2.94449		566000	1.2	4.5	4.5	3.4	1.90526
	566500	2.5	2.5	3.5	2.83333	0.57735		566500	3.6	3.6	4.5	3.9	0.519615		566500	12.4	4.6	3.1	6.7	4.993		566500	0.8	3	3	2.26667	1.27017
	567000	1.6	1.6	1.8	1.66667	0.11547		567000	1.2	1.2	3.5	1.96667	1.32791		567000	9.6	6.7	4	6.76667	2.8006		567000	1.2	2.6	1.8	1.86667	0.702377
	567500	1.3	1.3	1.3	1.3	0		567500	1.2	1.8	2.4	1.8	0.6		567500	17.5	15.9	9.3	14.2333	4.34665		567500	1	1.7	1.3	1.33333	0.351188
	568000	1.7	1.7	1.7	1.7	0		568000	4.8	5.8	4.8	5.13333	0.57735		568000	14.6	9	6.3	9.96667	4.2336		568000	0.7	1.3	1.3	1.1	0.34641
	568500	6.6	6.6	6.6	6.6	1.08779e-15		568500	8.4	11.8	8.4	9.53333	1.96299		568500	9.1	5.7	2.3	5.7	3.4		568500	0.7	2	2	1.56667	0.750555
	569000	3.5	3.5	4.9	3.96667	0.80829		569000	7.6	9.5	9.5	8.86667	1.09697		569000	14.7	12.2	7.8	11.5667	3.49333		569000	1	2.4	2.4	1.93333	0.80829
	569500	3	2.9	3.6	3.16667	0.378594		569500	5.9	9.5	6.4	7.26667	1.95021		569500	14.3	12.7	3.2	10.0667	6.00028		569500	2.3	2.5	2.5	2.43333	0.11547
	570000	4	2.7	3.8	3.5	0.7		570000	1.6	1.6	4.8	2.66667	1.84752		570000	16.3	11.5	5.9	11.2333	5.20513		570000	2.3	4.9	4.9	4.03333	1.50111
	570500	4.2	4.2	1.8	3.4	1.38564		570500	1.1	1.1	3.8	2	1.55885		570500	17	11.3	8.5	12.2667	4.33167		570500	0.8	1.9	1.9	1.53333	0.635085
	571000	1.4	1.4	0.6	1.13333	0.46188		571000	2.4	2.4	5	3.26667	1.50111		571000	18.8	18.8	11	16.2	4.50333		571000	0.8	2.9	2.9	2.2	1.21244
	571500	1.1	1.1	0.6	0.933333	0.288675		571500	1.9	1.9	4.8	2.86667	1.67432		571500	11.4	7.6	5.7	8.23333	2.9023		571500	1.6	6.6	6.6	4.93333	2.88675
	572000	1	1	0.6	0.866667	0.23094		572000	6.8	6.8	11	8.2	2.42487		572000	16.9	13.6	8.5	13	4.23202		572000	1	2.4	2.4	1.93333	0.80829
	572500	3.5	3.5	2.5	3.16667	0.57735		572500	8.3	10	10	9.43333	0.981495		572500	7.5	7.5	7	7.33333	0.288675		572500	4	6.9	4.9	5.26667	1.48436
	573000	2.3	2.3	2.2	2.26667	0.057735		573000	5	5	6.3	5.43333	0.750555		573000	18.7	14.9	7.5	13.7	5.69561		573000	1.7	3.5	2.6	2.6	0.9
	573500	6.6	5.3	4	5.3	1.3		573500	4.1	4.1	5.2	4.46667	0.635085		573500	12	12	6	10	3.4641		573500	0.8	1.5	1.5	1.26667	0.404145
	574000	4.9	3.3	3.3	3.83333	0.92376		574000	1.3	1.8	1.3	1.46667	0.288675		574000	9.2	6.6	3.9	6.56667	2.65016		574000	0.8	3.1	3.1	2.33333	1.32791
	574500	7.6	5.1	4.1	5.6	1.80278		574500	1	1.5	1	1.16667	0.288675		574500	9.4	9.4	3.8	7.53333	3.23316		574500	1.1	3.4	3.4	2.63333	1.32791
	575000	9.5	9.5	9.5	9.5	0		575000	1.7	2.5	1.7	1.96667	0.46188		575000	8.1	8.1	4.7	6.96667	1.96299		575000	0.7	2.4	2.4	1.83333	0.981495
	575500	1.5	1.5	1.5	1.5	0		575500	7.1	7.1	7.1	7.1	1.08779e-15		575500	18.1	16.6	4.5	13.0667	7.45676		575500	0.4	0.9	0.9	0.733333	0.288675
	576000	0.9	0.9	0.9	0.9	0		576000	5.7	5.7	5.7	5.7	0		576000	9.7	8.3	5.1	7.7	2.35797		576000	0.4	0.6	0.6	0.533333	0.11547
	576500	2.3	2.3	2.6	2.4	0.173205		576500	10.1	10.1	10.1	10.1	0		576500	8.5	8.5	8.5	8.5	0		576500	0.4	0.6	0.6	0.533333	0.11547
	577000	3.2	3.2	1.6	2.66667	0.92376		577000	1.8	1.9	1.8	1.83333	0.057735		577000	17.1	10.5	8.4	12	4.53982		577000	0.9	1.2	1.2	1.1	0.173205
	577500	2.6	2.6	2.2	2.46667	0.23094		577500	0.9	1	0.9	0.933333	0.057735		577500	5.7	3.8	3.8	4.43333	1.09697		577500	12	16.5	11.3	13.2667	2.82194
	578000	0.8	0.8	0.9	0.833333	0.057735		578000	1	2	1	1.33333	0.57735		578000	16	14.2	4.7	11.6333	6.07152		578000	2.5	2.5	1.9	2.3	0.34641
	578500	2.8	3.5	3	3.1	0.360555		578500	1.1	1.2	2.2	1.5	0.608276		578500	11.2	9.8	4.1	8.36667	3.76076		578500	1	1	1	1	0
	579000	4.5	4.5	3	4	0.866025		579000	2.4	2.9	5.4	3.56667	1.60728		579000	21.6	18	12	17.2	4.84974		579000	1	1	1	1	0
	579500	2.5	2.5	2.5	2.5	0		579500	0.8	1.1	1.1	1	0.173205		579500	13.9	10.2	3.8	9.3	5.10979		579500	1.8	3.9	3.3	3	1.08167
	580000	3.4	3.4	2.8	3.2	0.34641		580000	0.8	1.7	2.5	1.66667	0.85049		580000	5.1	5.1	2.3	4.16667	1.61658		580000	0.4	3	3	2.13333	1.50111
	580500	0.8	0.8	0.8	0.8	1.35974e-16		580500	2.6	4.3	7.4	4.76667	2.43379		580500	8.8	7.6	6.3	7.56667	1.25033		580500	0.4	5.1	5.1	3.53333	2.71355
	581000	0.8	0.8	0.8	0.8	1.35974e-16		581000	1.2	1.2	2.7	1.7	0.866025		581000	5.1	5.1	5.1	5.1	0		581000	0.4	3.5	3.5	2.46667	1.78979
	581500	4.1	4.1	3.5	3.9	0.34641		581500	2.2	2.2	6.7	3.7	2.59808		581500	10.8	9.7	5.8	8.76667	2.62742		581500	0.4	1.9	1.9	1.4	0.866025
	582000	6.2	6.2	8.2	6.86667	1.1547		582000	2.4	2.9	6.7	4	2.3516		582000	8.7	7.3	4.2	6.73333	2.3029		582000	0.7	1.9	1.9	1.5	0.69282
	582500	3.3	3.3	1.5	2.7	1.03923		582500	0.6	0.7	2.3	1.2	0.953939		582500	9.5	7.9	4.8	7.4	2.38956		582500	1.1	2.5	2.5	2.03333	0.80829
	583000	2.5	2.5	0.9	1.96667	0.92376		583000	0.6	0.7	2	1.1	0.781025		583000	21.9	18.2	9.6	16.5667	6.31057		583000	0.6	2.2	2.2	1.66667	0.92376
	583500	7.9	7.9	5.6	7.13333	1.32791		583500	0.6	0.7	2.7	1.33333	1.18462		583500	13	13	4.7	10.2333	4.79201		583500	0.6	2	2	1.53333	0.80829
	584000	3.3	3.3	3.3	3.3	5.43896e-16		584000	1.8	1.8	6.9	3.5	2.94449		584000	17.3	13.3	6.6	12.4	5.40648		584000	1	2.7	2.7	2.13333	0.981495
	584500	1.3	1.3	0.9	1.16667	0.23094		584500	7.9	7.9	9.8	8.53333	1.09697		584500	13.5	11.6	7.7	10.9333	2.95691		584500	8.5	8.5	8.5	8.5	0
	585000	1.8	1.8	1.4	1.66667	0.23094		585000	4.7	4.7	4.7	4.7	0		585000	11.9	11.8	8.1	10.6	2.16564		585000	5.5	5.5	5.5	5.5	0
	585500	3	3	3	3	0		585500	2.4	2.5	3.9	2.93333	0.83865		585500	5.6	5.6	2.8	4.66667	1.61658		585500	1.5	1.5	1.5	1.5	0
	586000	6.1	6.1	6.1	6.1	1.08779e-15		586000	1.1	1.2	2.2	1.5	0.608276		586000	7.3	7.3	4.3	6.3	1.73205		586000	1.5	1.5	1.5	1.5	0
	586500	8.3	8.3	8.3	8.3	0		586500	2	2.8	3.4	2.73333	0.702377		586500	9.4	7.8	4.2	7.13333	2.66333		586500	2.5	2.6	1.7	2.26667	0.493288
	587000	2.4	2.3	2.3	2.33333	0.057735		587000	2.4	3.7	3.7	3.26667	0.750555		587000	9.5	6	5.5	7	2.17945		587000	3.1	5.1	3.7	3.96667	1.02632
	587500	1	1	1	1	0		587500	2.7	2.7	2.7	2.7	5.43896e-16		587500	15.3	15.3	6.8	12.4667	4.90748		587500	12.1	14.7	10.7	12.5	2.02978
	588000	5.3	4.7	4.5	4.83333	0.416333		588000	1.6	1.6	2.6	1.93333	0.57735		588000	17	11.9	6.5	11.8	5.25071		588000	2.5	7.3	7.3	5.7	2.77128
	588500	2.8	2.8	4.1	3.23333	0.750555		588500	2.7	2.7	9	4.8	3.63731		588500	12.5	10.7	5.1	9.43333	3.85919		588500	0.8	2.4	2.4	1.86667	0.92376
	589000	5	5	5	5	0		589000	12.4	13.2	14.2	13.2667	0.90185		589000	7.5	7.5	3	6	2.59808		589000	0.8	2.7	2.7	2.06667	1.09697
	589500	4.3	4.3	4.3	4.3	0		589500	8.6	10.4	8.6	9.2	1.03923		589500	12.3	9.2	4	8.5	4.19404		589500	2.4	5.9	5.9	4.73333	2.02073
	590000	3.4	3.4	3.4	3.4	0		590000	7.8	8.3	9.3	8.46667	0.763763		590000	15.5	12.1	5.2	10.9333	5.24817		590000	1.3	5.9	5.9	4.36667	2.65581
	590500	2.7	2.7	2.7	2.7	5.43896e-16		590500	3.4	4.1	5.5	4.33333	1.06927		590500	15.9	12.4	8.5	12.2667	3.7018		590500	1	1.5	1.5	1.33333	0.288675
	591000	2.3	2	2	2.1	0.173205		591000	1	1	1	1	0		591000	9.1	8.5	5.2	7.6	2.1		591000	1.4	4.1	3.7	3.06667	1.45717
	591500	2.6	1.7	1.7	2	0.519615		591500	2.3	3	2.3	2.53333	0.404145		591500	11.8	10.1	6.7	9.53333	2.59679		591500	2.3	3.6	1.8	2.56667	0.929157
	592000	3.5	3.5	3.5	3.5	0		592000	5.4	6.2	6	5.86667	0.416333		592000	8.8	5.3	5.3	6.46667	2.02073		592000	1.1	2.7	2	1.93333	0.802081
	592500	5.1	5.1	5.1	5.1	0		592500	3.6	3.6	5.4	4.2	1.03923		592500	10	8	5.4	7.8	2.30651		592500	0.7	2.3	2.3	1.76667	0.92376
	593000	3.7	3.7	3.7	3.7	5.43896e-16		593000	2	2	2.1	2.03333	0.057735		593000	12.8	8.5	4.3	8.53333	4.2501		593000	0.7	4.2	4.2	3.03333	2.02073
	593500	2.5	2.5	2.6	2.53333	0.057735		593500	2.6	2.6	2.6	2.6	0		593500	8.8	8.8	7.7	8.43333	0.635085		593500	0.9	3.1	3.1	2.36667	1.27017
	594000	0.8	0.8	1	0.866667	0.11547		594000	2.4	2.4	2.4	2.4	0		594000	26.1	18.2	11.8	18.7	7.1631		594000	1.1	3.3	3.3	2.56667	1.27017
	594500	0.8	0.8	1.4	1	0.34641		594500	1.8	1.9	2.1	1.93333	0.152753		594500	11.5	7.7	5.7	8.3	2.94618		594500	2.5	10.6	10.6	7.9	4.67654
	595000	1.1	1.1	2.4	1.53333	0.750555		595000	3.2	4.8	6.5	4.83333	1.65025		595000	7.1	5.4	3.2	5.23333	1.95533		595000	0.9	4.4	4.4	3.23333	2.02073
	595500	1.7	1.7	2.5	1.96667	0.46188		595500	2.6	2.6	4.1	3.1	0.866025		595500	10.4	8.1	4.5	7.66667	2.97377		595500	0.9	2.4	2.4	1.9	0.866025
	596000	1.5	1.5	1.5	1.5	0		596000	8.4	8.4	8.6	8.46667	0.11547		596000	10.6	6.1	4.5	7.06667	3.1628		596000	1.1	4.3	4.3	3.23333	1.84752
	596500	3	3	3	3	0		596500	8.2	9.5	9.5	9.06667	0.750555		596500	8.6	8.6	8.6	8.6	0		596500	0.6	4.4	4.4	3.13333	2.19393
	597000	4.7	4.7	6.2	5.2	0.866025		597000	3.6	3.6	4.1	3.76667	0.288675		597000	10.8	8.1	5.4	8.1	2.7		597000	0.6	4.3	4.3	3.06667	2.1362
	597500	1.1	1.1	3.3	1.83333	1.27017		597500	5.7	5.7	7.7	6.36667	1.1547		597500	4.1	2.6	2.4	3.03333	0.929157		597500	1.9	9	7.5	6.13333	3.7421
	598000	4.9	4.9	9.9	6.56667	2.88675		598000	2.6	3	4.3	3.3	0.888819		598000	7.2	5.9	5.9	6.33333	0.750555		598000	1.2	3.6	3.6	2.8	1.38564
	598500	6.1	6.1	6.1	6.1	1.08779e-15		598500	11.7	13.4	13.4	12.8333	0.981495		598500	8.9	8.9	7.6	8.46667	0.750555		598500	1.6	2.1	2.1	1.93333	0.288675
	599000	6.4	6.4	8.3	7.03333	1.09697		599000	3.3	3.3	3.3	3.3	5.43896e-16		599000	6	6	6	6	0		599000	1.1	1.1	1.1	1.1	0
	599500	5.3	5.3	7.1	5.9	1.03923		599500	4.1	4.1	4.9	4.36667	0.46188		599500	11.8	11.8	10.1	11.2333	0.981495		599500	5.6	6.3	5.6	5.83333	0.404145
	600000	6.4	6.4	8.3	7.03333	1.09697		600000	2.1	2.1	2.1	2.1	0		600000	13.6	9.1	5.8	9.5	3.91535		600000	2	2.2	2.2	2.13333	0.11547
	600500	3.1	3.1	3.8	3.33333	0.404145		600500	5.3	5.3	5.3	5.3	0		600500	14.9	13.3	6.6	11.6	4.40341		600500	1.6	3.3	2.5	2.46667	0.85049
	601000	1.6	1.6	1.6	1.6	2.71948e-16		601000	7.8	7.8	9.1	8.23333	0.750555		601000	8.4	8	7.8	8.06667	0.305505		601000	0.9	2.9	2.9	2.23333	1.1547
	601500	2.3	2.3	2.3	2.3	0		601500	1.9	1.9	2.5	2.1	0.34641		601500	13.8	9.9	4.8	9.5	4.51331		601500	0.9	3.1	2.2	2.06667	1.10604
	602000	2.6	2.6	2.6	2.6	0		602000	2	2.4	3	2.46667	0.503322		602000	19.2	17.9	6.4	14.5	7.04486		602000	3.8	8	6.9	6.23333	2.17792
	602500	2.6	2.6	2.1	2.43333	0.288675		602500	9.9	11.6	9.9	10.4667	0.981495		602500	13.4	11.1	5.6	10.0333	4.00791		602500	1.8	5.3	5.3	4.13333	2.02073
	603000	2	2	1	1.66667	0.57735		603000	6.5	6.5	7.7	6.9	0.69282		603000	13.8	12.1	8.2	11.3667	2.87112		603000	0.5	3.2	3.2	2.3	1.55885
	603500	4.2	4.2	2.8	3.73333	0.80829		603500	1.1	1.1	2.3	1.5	0.69282		603500	17	12.8	9.9	13.2333	3.56978		603500	0.5	3.5	3.5	2.5	1.73205
	604000	1.3	1.3	1.3	1.3	0		604000	1.2	1.2	2.9	1.76667	0.981495		604000	4.8	4.8	4.8	4.8	0		604000	0.5	2.6	2.5	1.86667	1.18462
	604500	1.8	1.8	1.8	1.8	0		604500	1.5	1.5	2.9	1.96667	0.80829		604500	6.4	6.2	6	6.2	0.2		604500	1.8	6.5	5.4	4.56667	2.45832
	605000	3.6	3.6	3.6	3.6	0		605000	1.5	1.5	3.2	2.06667	0.981495		605000	15.2	11.4	3.8	10.1333	5.8046		605000	1.6	3.1	3.1	2.6	0.866025
	605500	4	4	5	4.33333	0.57735		605500	1.3	1.3	2.5	1.7	0.69282		605500	8.7	7	4.2	6.63333	2.2723		605500	2.5	4	2	2.83333	1.04083
	606000	3.2	3.2	3.2	3.2	5.43896e-16		606000	1.3	1.3	2.1	1.56667	0.46188		606000	9.7	9.7	6.3	8.56667	1.96299		606000	1.7	3.5	2	2.4	0.964365
	606500	9.6	9.6	5.1	8.1	2.59808		606500	1.3	1.3	2.7	1.76667	0.80829		606500	11.3	8.8	5	8.36667	3.17228		606500	4.9	9.6	9.6	8.03333	2.71355
	607000	7.9	7.9	7.9	7.9	1.08779e-15		607000	6.2	6.2	8	6.8	1.03923		607000	8.5	8.1	4.7	7.1	2.08806		607000	2.7	3.5	2.8	3	0.43589
	607500	7.1	7.1	7.1	7.1	1.08779e-15		607500	2.6	3.9	2.6	3.03333	0.750555		607500	7.9	6.4	6.4	6.9	0.866025		607500	0.7	0.8	0.8	0.766667	0.057735
	608000	9.7	9.7	9.7	9.7	0		608000	3.1	3.1	3.1	3.1	0		608000	6.7	4.8	3.2	4.9	1.75214		608000	1.4	2.2	2.2	1.93333	0.46188
	608500	2.8	2.8	4.2	3.26667	0.80829		608500	1.4	1.4	1.4	1.4	2.71948e-16		608500	7	2.6	1.2	3.6	3.02655		608500	3.2	5.5	5.5	4.73333	1.32791
	609000	1.6	1.6	3.3	2.16667	0.981495		609000	2.6	3.5	2.6	2.9	0.519615		609000	20.4	14.8	4.1	13.1	8.28191		609000	2	5.9	5.1	4.33333	2.05994
	609500	1.5	1.5	1.7	1.56667	0.11547		609500	1.1	1.3	3.2	1.86667	1.15902		609500	20.1	18.2	14.6	17.6333	2.79344		609500	0.6	1.4	1.4	1.13333	0.46188
	610000	1.3	1.3	1.3	1.3	0		610000	0.7	0.7	2.2	1.2	0.866025		610000	8.9	7.4	7.4	7.9	0.866025		610000	0.6	3.5	3.5	2.53333	1.67432
	610500	4	4	2.8	3.6	0.69282		610500	1.1	1.1	1.8	1.33333	0.404145		610500	11.6	9.3	7	9.3	2.3		610500	0.6	3	2.4	2	1.249
	611000	3.1	3.1	1.6	2.6	0.866025		611000	3.4	3.4	3.4	3.4	0		611000	11.5	6.6	3.3	7.13333	4.12593		611000	1.3	4.3	2.6	2.73333	1.50444
	611500	4.2	4.2	2.3	3.56667	1.09697		611500	2.8	2.8	2.8	2.8	5.43896e-16		611500	6.8	6.8	5.5	6.36667	0.750555		611500	5.7	10.2	8.7	8.2	2.29129
	612000	2.7	2.7	2.1	2.5	0.34641		612000	2	2.2	2	2.06667	0.11547		612000	11.9	7.9	6.5	8.76667	2.80238		612000	2.6	2.7	2.7	2.66667	0.057735
	612500	1.4	1.4	1.3	1.36667	0.057735		612500	1.1	2.1	1.1	1.43333	0.57735		612500	16.8	8.4	4.4	9.86667	6.32877		612500	1.2	1.2	1.2	1.2	0
	613000	1.5	1.5	2.2	1.73333	0.404145		613000	2	4.1	2	2.7	1.21244		613000	9.4	6.2	4.6	6.73333	2.44404		613000	1.5	2.3	2.3	2.03333	0.46188
	613500	4.7	4.7	5.7	5.03333	0.57735		613500	2.3	2.3	2.3	2.3	0		613500	12.6	12.6	8.4	11.2	2.42487		613500	0.5	0.7	0.7	0.633333	0.11547
	614000	6.1	6.1	6.1	6.1	1.08779e-15		614000	1.5	1.5	3.5	2.16667	1.1547		614000	6.7	5	2.9	4.86667	1.90351		614000	0.3	0.4	0.4	0.366667	0.057735
	614500	8.1	8.1	8.1	8.1	0		614500	1	1	6.2	2.73333	3.00222		614500	11.4	6.4	4.3	7.36667	3.64737		614500	0.3	0.4	0.4	0.366667	0.057735
	615000	4.9	4.9	4.9	4.9	0		615000	1.4	2.1	7.4	3.63333	3.28075		615000	15.5	8	5.8	9.76667	5.0856		615000	0.3	0.4	0.4	0.366667	0.057735
	615500	2.3	2.3	2.3	2.3	0		615500	2.3	2.4	2.8	2.5	0.264575		615500	9.4	6.3	5.2	6.96667	2.17792		615500	0.3	0.4	0.4	0.366667	0.057735
	616000	2.2	2.2	2.2	2.2	0		616000	2.3	3.2	5.3	3.6	1.53948		616000	5.5	5.5	3.3	4.76667	1.27017		616000	0.3	0.6	0.5	0.466667	0.152753
	616500	2.1	2.1	2.1	2.1	0		616500	1.3	2.7	4.3	2.76667	1.50111		616500	8.8	7.5	5	7.1	1.93132		616500	0.3	1.1	1.1	0.833333	0.46188
	617000	1.1	1.1	1.1	1.1	0		617000	1.6	2.5	3.5	2.53333	0.950438		617000	15.2	11.8	5	10.6667	5.19359		617000	1.2	4.1	3.4	2.9	1.51327
	617500	1.4	1.4	1.4	1.4	2.71948e-16		617500	7.9	7.9	7.9	7.9	1.08779e-15		617500	8.6	6.8	3.4	6.26667	2.64071		617500	1.9	2.2	2.2	2.1	0.173205
	618000	3.8	3.8	3.8	3.8	5.43896e-16		618000	2.6	2.6	4	3.06667	0.80829		618000	5.4	5.4	5.1	5.3	0.173205		618000	2.6	3.8	3.8	3.4	0.69282
	618500	3	3	3	3	0		618500	2.7	3.4	5.2	3.76667	1.2897		618500	12.3	10	7.5	9.93333	2.40069		618500	3.6	4.5	4.5	4.2	0.519615
	619000	4.1	4.1	4.1	4.1	0		619000	1.1	1.3	2.5	1.63333	0.757188		619000	15.6	12	7.5	11.7	4.05832		619000	1.3	1.5	1.5	1.43333	0.11547
	619500	5.6	4.5	3.4	4.5	1.1		619500	2.1	2.3	4.9	3.1	1.56205		619500	14.7	7.9	6.6	9.73333	4.3501		619500	6.5	7.5	6.6	6.86667	0.550757
	620000	2	1.9	1.5	1.8	0.264575		620000	2.4	2.4	2.4	2.4	0		620000	22.3	12	7.9	14.0667	7.41912		620000	5.4	5.4	5.4	5.4	1.08779e-15
	620500	1.7	1.7	1.7	1.7	0		620500	6.3	6.3	7.4	6.66667	0.635085		620500	13.2	11.8	6.7	10.5667	3.42101		620500	2.5	3.7	2.4	2.86667	0.723418
	621000	3.2	3.2	3.2	3.2	5.43896e-16		621000	3.7	3.7	4.9	4.1	0.69282		621000	16.4	14.9	11.9	14.4	2.29129		621000	2	3	1.5	2.16667	0.763763
	621500	6.8	6.8	6.8	6.8	0		621500	1.3	1.3	2.8	1.8	0.866025		621500	11.9	10.2	6.8	9.63333	2.59679		621500	4.1	5.3	3.5	4.3	0.916515
	622000	3.3	2.2	1.8	2.43333	0.776745		622000	1.2	1.2	1.5	1.3	0.173205		622000	25.2	11.5	9.9	15.5333	8.40972		622000	0.9	1.1	1.1	1.03333	0.11547
	622500	0.9	0.5	0.5	0.633333	0.23094		622500	4.1	4.7	4.6	4.46667	0.321455		622500	16.8	11.5	11.5	13.2667	3.05996		622500	0.8	2	2	1.6	0.69282
	623000	1.1	0.5	0.5	0.7	0.34641		623000	10.8	12.6	10.8	11.4	1.03923		623000	9.6	7.7	4.8	7.36667	2.4173		623000	0.7	2.5	2.5	1.9	1.03923
	623500	1.4	0.5	0.5	0.8	0.519615		623500	2.6	2.6	2.6	2.6	0		623500	15.5	10.7	5.5	10.5667	5.00133		623500	0.7	2.2	2.2	1.7	0.866025
	624000	1.4	0.8	0.8	1	0.34641		624000	2.6	2.6	2.6	2.6	0		624000	19	13.3	4.4	12.2333	7.35822		624000	0.8	1.8	1.8	1.46667	0.57735
	624500	2.2	2.2	1.7	2.03333	0.288675		624500	3.4	3.4	3.4	3.4	0		624500	17	15.2	11.1	14.4333	3.02379		624500	0.9	2.1	2.1	1.7	0.69282
	625000	9.7	9.7	4.9	8.1	2.77128		625000	3.8	4.9	3.8	4.16667	0.635085		625000	26.8	21.4	8.9	19.0333	9.18168		625000	1.2	2.6	2.6	2.13333	0.80829
	625500	5.5	5.5	5.5	5.5	0		625500	7.3	10.2	8.7	8.73333	1.45029		625500	16.1	10.7	6.7	11.1667	4.71734		625500	4	4	4	4	0
	626000	1.5	1.5	1.5	1.5	0		626000	6.7	6.7	13.4	8.93333	3.86825		626000	11.6	6.4	6.4	8.13333	3.00222		626000	2.5	3.8	3.6	3.3	0.7
	626500	2.4	2.4	2.4	2.4	0		626500	1.6	1.6	3.2	2.13333	0.92376		626500	11.9	6.2	4.7	7.6	3.79868		626500	4.2	4.3	3.8	4.1	0.264575
	627000	1.4	1.4	1	1.26667	0.23094		627000	2.9	2.9	3.1	2.96667	0.11547		627000	8.5	8.5	7.1	8.03333	0.80829		627000	1.1	1.1	1.1	1.1	0
	627500	1.2	1.2	0.7	1.03333	0.288675		627500	9	9	9	9	0		627500	17.8	15	8.2	13.6667	4.93694		627500	0.8	0.9	0.9	0.866667	0.057735
	628000	1.3	1.3	0.7	1.1	0.34641		628000	5	5	15	8.33333	5.7735		628000	13.6	6.5	4.2	8.1	4.9		628000	0.7	0.8	0.8	0.766667	0.057735
	628500	2	2	1.1	1.7	0.519615		628500	1.9	1.9	4.8	2.86667	1.67432		628500	8.1	4.8	3.2	5.36667	2.49867		628500	0.7	0.8	0.8	0.766667	0.057735
	629000	2.6	2.6	2.6	2.6	0		629000	2.9	2.9	4.2	3.33333	0.750555		629000	12.8	12.7	6.4	10.6333	3.66652		629000	1.1	1.7	1.7	1.5	0.34641
	629500	1.1	1.1	2.5	1.56667	0.80829		629500	6.7	6.7	8.3	7.23333	0.92376		629500	6.8	5.1	1.5	4.46667	2.70617		629500	1	1.8	1.8	1.53333	0.46188
	630000	0.7	0.7	1.3	0.9	0.34641		630000	5.6	5.6	5.6	5.6	1.08779e-15		630000	15.9	13	4.6	11.1667	5.86884		630000	0.6	0.9	0.9	0.8	0.173205
	630500	0.7	0.7	0.5	0.633333	0.11547		630500	3.5	3.5	3.5	3.5	0		630500	9	9	7.5	8.5	0.866025		630500	0.6	0.9	0.9	0.8	0.173205
	631000	0.8	0.8	0.5	0.7	0.173205		631000	4	4.2	5.4	4.53333	0.757188		631000	8.8	8.8	4.9	7.5	2.25167		631000	0.7	2.1	2.1	1.63333	0.80829
	631500	0.8	0.8	0.5	0.7	0.173205		631500	9.8	11.8	9.8	10.4667	1.1547		631500	3.8	3.8	3.8	3.8	5.43896e-16		631500	0.8	2.4	2.4	1.86667	0.92376
	632000	1.3	1.3	1.2	1.26667	0.057735		632000	8.8	8.8	8.8	8.8	0		632000	15.2	13.6	11.9	13.5667	1.65025		632000	0.8	1.3	1.3	1.13333	0.288675
	632500	3.1	3.1	2.1	2.76667	0.57735		632500	4.2	4.2	4.2	4.2	0		632500	9.5	9.5	7.7	8.9	1.03923		632500	4	7.3	6.4	5.9	1.70587
	633000	2.9	2.8	1.3	2.33333	0.896289		633000	2.8	3.7	3.1	3.2	0.458258		633000	7	6	4.8	5.93333	1.10151		633000	5.3	6.5	6.5	6.1	0.69282
	633500	2.3	2.3	1.1	1.9	0.69282		633500	4.5	4.5	7.5	5.5	1.73205		633500	8	6.6	2.6	5.73333	2.80238		633500	1.9	1.9	1.9	1.9	2.71948e-16
	634000	2.9	2.9	3.8	3.2	0.519615		634000	9.9	11.3	12.8	11.3333	1.45029		634000	16.3	10.9	8	11.7333	4.21228		634000	4.9	5.8	4.1	4.93333	0.85049
	634500	1.2	1.2	2.5	1.63333	0.750555		634500	7.5	8.8	8	8.1	0.655744		634500	19.4	16.4	8.9	14.9	5.40833		634500	1.8	3.9	2.6	2.76667	1.05987
	635000	2.5	1.6	3.2	2.43333	0.802081		635000	6.7	8.3	6.7	7.23333	0.92376		635000	10.3	10.3	10.3	10.3	0		635000	0.9	4.5	4.5	3.3	2.07846
	635500	5.4	4.2	4.6	4.73333	0.61101		635500	3.8	4.9	3.8	4.16667	0.635085		635500	8.1	5.8	5.8	6.56667	1.32791		635500	2	3.7	3.3	3	0.888819
	636000	3.3	4.4	2.2	3.3	1.1		636000	3.1	3.1	4.6	3.6	0.866025		636000	3	2.8	2.8	2.86667	0.11547		636000	1	2.5	1.3	1.6	0.793725
	636500	1.1	1.5	1.5	1.36667	0.23094		636500	12.2	12.2	12.6	12.3333	0.23094		636500	12.2	10.8	10.8	11.2667	0.80829		636500	0.7	2.9	1.8	1.8	1.1
	637000	0.7	1	1	0.9	0.173205		637000	2.9	2.9	3.4	3.06667	0.288675		637000	4.3	4.3	4	4.2	0.173205		637000	0.7	1.6	1.6	1.3	0.519615
	637500	0.7	1.4	2.1	1.4	0.7		637500	1.2	1.2	1.6	1.33333	0.23094		637500	6.7	6.7	5.6	6.33333	0.635085		637500	1	1.8	1.8	1.53333	0.46188
	638000	2.9	5.5	7.9	5.43333	2.50067		638000	1.2	1.3	1.8	1.43333	0.321455		638000	11.9	10.7	8.3	10.3	1.83303		638000	1.5	1.5	1.5	1.5	0
	638500	2	2	2.2	2.06667	0.11547		638500	1.3	1.4	1.3	1.33333	0.057735		638500	7	7	3.5	5.83333	2.02073		638500	3	3	1.8	2.6	0.69282
	639000	1.3	1.3	1.2	1.26667	0.057735		639000	2.7	3.4	3.4	3.16667	0.404145		639000	11.9	10.2	7.4	9.83333	2.2723		639000	0.7	1.4	0.7	0.933333	0.404145
	639500	1	1	1.3	1.1	0.173205		639500	2.8	2.8	2.8	2.8	5.43896e-16		639500	13.5	10.5	9.5	11.1667	2.08167		639500	0.5	1.1	0.7	0.766667	0.305505
	640000	1.6	1.6	2.1	1.76667	0.288675		640000	5.5	5.5	5.5	5.5	0		640000	16.4	10.4	6.8	11.2	4.84974		640000	0.5	2.3	1.6	1.46667	0.907377
	640500	2.7	2.2	3.4	2.76667	0.602771		640500	3.5	4.7	4.7	4.3	0.69282		640500	15.7	12.6	3.1	10.4667	6.56531		640500	0.5	1.7	1.4	1.2	0.6245
	641000	3.6	3.6	5.6	4.26667	1.1547		641000	3.9	5	5.2	4.7	0.7		641000	13.6	10.2	3.4	9.06667	5.19359		641000	0.9	1.9	1	1.26667	0.550757
	641500	3.7	3.7	3.2	3.53333	0.288675		641500	3.9	3.9	5.2	4.33333	0.750555		641500	11.6	10	10	10.5333	0.92376		641500	2.2	4.2	2	2.8	1.21655
	642000	3.9	8.1	5.8	5.93333	2.10317		642000	8.8	8.8	14.2	10.6	3.11769		642000	11	7.8	5.6	8.13333	2.71539		642000	0.7	2.2	2.2	1.7	0.866025
	642500	0.7	1.4	1.4	1.16667	0.404145		642500	4.1	4.7	4.8	4.53333	0.378594		642500	11.3	11.3	5.6	9.4	3.2909		642500	0.5	0.5	0.5	0.5	0
	643000	0.7	0.8	0.8	0.766667	0.057735		643000	1	1	1	1	0		643000	18.4	10.1	5	11.1667	6.76338		643000	0.5	0.5	0.5	0.5	0
	643500	4.2	4.7	4.7	4.53333	0.288675		643500	1.9	1.9	1.9	1.9	2.71948e-16		643500	7.8	5.6	5.6	6.33333	1.27017		643500	0.5	0.5	0.5	0.5	0
	644000	9.8	9.8	14	11.2	2.42487		644000	3.5	3.5	3.5	3.5	0		644000	12	6.9	5	7.96667	3.61985		644000	1.8	2.7	2.7	2.4	0.519615
	644500	2.1	2.1	4.1	2.76667	1.1547		644500	3.9	4.4	4.4	4.23333	0.288675		644500	14.7	14.5	9.6	12.9333	2.88848		644500	1.4	8.4	8.4	6.06667	4.04145
	645000	2.1	2.1	3.4	2.53333	0.750555		645000	1.1	1.1	1.1	1.1	0		645000	15.6	14.4	7.8	12.6	4.2		645000	0.9	2.3	2.3	1.83333	0.80829
	645500	7.8	7.3	7.3	7.46667	0.288675		645500	1.1	1.1	1.1	1.1	0		645500	7.1	7.1	5.3	6.5	1.03923		645500	0.4	0.7	0.7	0.6	0.173205
	646000	5.5	4.1	4.1	4.56667	0.80829		646000	1.2	1.2	1.2	1.2	0		646000	13.3	11.4	9.5	11.4	1.9		646000	0.4	0.7	0.7	0.6	0.173205
	646500	4.6	4.6	5.1	4.76667	0.288675		646500	1.5	1.5	2.4	1.8	0.519615		646500	7.9	7.9	7.9	7.9	1.08779e-15		646500	0.4	0.7	0.7	0.6	0.173205
	647000	0.9	0.9	0.9	0.9	0		647000	1.9	1.9	3.6	2.46667	0.981495		647000	12.5	11.4	9.1	11	1.73494		647000	0.4	0.8	0.8	0.666667	0.23094
	647500	0.9	0.9	0.9	0.9	0		647500	3.2	3.2	3.3	3.23333	0.057735		647500	4.7	4.7	4.7	4.7	0		647500	1.6	3.3	2.8	2.56667	0.873689
	648000	2.7	2.7	2.6	2.66667	0.057735		648000	2.7	2.7	3.6	3	0.519615		648000	21.4	19.6	7.7	16.2333	7.44468		648000	1	2	2	1.66667	0.57735
	648500	4.4	3.5	2.6	3.5	0.9		648500	1.8	1.8	1.8	1.8	0		648500	15.2	12.4	8.3	11.9667	3.47035		648500	1.4	3.5	3.5	2.8	1.21244
	649000	1.7	1.7	1.7	1.7	0		649000	4.8	5.4	7.2	5.8	1.249		649000	11.8	10.9	5.7	9.46667	3.29292		649000	2.4	5.6	5.6	4.53333	1.84752
	649500	2.6	2.6	2.6	2.6	0		649500	1.1	1.5	2.2	1.6	0.556776		649500	21.5	16.5	9.9	15.9667	5.81836		649500	2	4.5	4.5	3.66667	1.44338
	650000	1.2	1.2	1.2	1.2	0		650000	2	2.4	2.7	2.36667	0.351188		650000	5.5	5.5	3.8	4.93333	0.981495		650000	2.1	6.8	6.8	5.23333	2.71355
	650500	5.7	5.7	5.7	5.7	0		650500	3.3	3.3	3.3	3.3	5.43896e-16		650500	7.1	6.1	5.1	6.1	1		650500	1.3	4.2	4.2	3.23333	1.67432
	651000	2.6	2.6	2.6	2.6	0		651000	6.4	6.4	7.7	6.83333	0.750555		651000	11	9.5	6.8	9.1	2.12838		651000	1	4.7	4.7	3.46667	2.1362
	651500	1.9	2.8	2.8	2.5	0.519615		651500	11.2	12.6	11.2	11.6667	0.80829		651500	7.4	7.4	4.9	6.56667	1.44338		651500	0.8	1.7	1.7	1.4	0.519615
	652000	5.6	5.6	4.5	5.23333	0.635085		652000	5.8	5.8	5.8	5.8	0		652000	11.7	8.8	5.8	8.76667	2.95014		652000	2.9	5.2	5.2	4.43333	1.32791
	652500	3.2	3.2	4.3	3.56667	0.635085		652500	2.7	2.9	4.1	3.23333	0.757188		652500	13	11.1	8.4	10.8333	2.31157		652500	0.8	1	1	0.933333	0.11547
	653000	1.4	1.4	1.4	1.4	2.71948e-16		653000	2.1	3.1	2.4	2.53333	0.51316		653000	13.4	10	9.5	10.9667	2.12211		653000	0.4	0.6	0.6	0.533333	0.11547
	653500	1.1	1.1	1.1	1.1	0		653500	4.1	5.2	4.1	4.46667	0.635085		653500	12.9	12.9	11.1	12.3	1.03923		653500	0.4	0.6	0.6	0.533333	0.11547
	654000	4.2	4.2	4.2	4.2	0		654000	2.5	2.5	3.7	2.9	0.69282		654000	15.2	13.3	7.6	12.0333	3.95517		654000	0.4	0.9	0.9	0.733333	0.288675
	654500	2.8	3.7	6.1	4.2	1.70587		654500	2.1	2.1	2.2	2.13333	0.057735		654500	10.3	8.6	5.5	8.13333	2.43379		654500	0.6	3	3	2.2	1.38564
	655000	1.1	1.1	2.2	1.46667	0.635085		655000	2.1	2.1	2.5	2.23333	0.23094		655000	18.5	14.8	14.8	16.0333	2.1362		655000	1	3	3	2.33333	1.1547
	655500	5.1	5.1	4.2	4.8	0.519615		655500	1.6	2.5	3.5	2.53333	0.950438		655500	14.1	12.2	8.4	11.5667	2.9023		655500	1	2.8	2.8	2.2	1.03923
	656000	2.3	2.3	1.1	1.9	0.69282		656000	2.1	2.1	4.5	2.9	1.38564		656000	16.8	11.7	6.7	11.7333	5.05008		656000	1	1.9	1.9	1.6	0.519615
	656500	1.3	1.3	1.2	1.26667	0.057735		656500	1.5	1.5	5.2	2.73333	2.1362		656500	11.2	11.2	8.4	10.2667	1.61658		656500	1.4	3.2	3.2	2.6	1.03923
	657000	1.3	1.3	1.3	1.3	0		657000	1.2	1.2	4.2	2.2	1.73205		657000	17.1	17.1	8.5	14.2333	4.96521		657000	0.8	2.5	1.7	1.66667	0.85049
	657500	1.4	1.4	1.4	1.4	2.71948e-16		657500	1	1	2	1.33333	0.57735		657500	9.6	9.6	3.7	7.63333	3.40637		657500	0.5	1.2	0.9	0.866667	0.351188
	658000	4	4	4	4	0		658000	1	1.6	1.5	1.36667	0.321455		658000	11.2	11.2	2.2	8.2	5.19615		658000	0.5	1	0.9	0.8	0.264575
	658500	4.6	4.6	4.6	4.6	0		658500	1.1	1.2	2.2	1.5	0.608276		658500	10.4	9.1	7.2	8.9	1.60935		658500	0.5	0.9	0.9	0.766667	0.23094
	659000	8.5	8.5	9.6	8.86667	0.635085		659000	2.1	2.2	5.5	3.26667	1.93477		659000	8.3	6.9	5.5	6.9	1.4		659000	0.6	1.2	0.7	0.833333	0.321455
	659500	2.2	2.2	2.2	2.2	0		659500	5.3	5.3	6.6	5.73333	0.750555		659500	6.9	5	2.8	4.9	2.05183		659500	0.8	0.8	0.6	0.733333	0.11547
	660000	0.9	0.9	0.9	0.9	0		660000	11.5	11.5	14.4	12.4667	1.67432		660000	13.4	8.6	5.6	9.2	3.93446		660000	0.8	0.8	0.6	0.733333	0.11547
	660500	4	4	4.2	4.06667	0.11547		660500	6.6	6.6	8.5	7.23333	1.09697		660500	14.7	13.4	5.7	11.2667	4.8645		660500	0.5	1.4	0.9	0.933333	0.450925
	661000	1.5	1.5	3	2	0.866025		661000	2.3	2.5	2.3	2.36667	0.11547		661000	10.7	8.6	6.3	8.53333	2.20076		661000	0.4	1.7	1.7	1.26667	0.750555
	661500	1.6	1.6	2.5	1.9	0.519615		661500	2.6	3.5	4.3	3.46667	0.85049		661500	16.4	11	5.5	10.9667	5.45008		661500	0.4	2.8	2.8	2	1.38564
	662000	6.6	6.6	5.5	6.23333	0.635085		662000	1.7	1.7	2.6	2	0.519615		662000	6.8	6.8	3.6	5.73333	1.84752		662000	0.4	1.8	1.8	1.33333	0.80829
	662500	6.5	6.5	6.5	6.5	0		662500	1.1	1.1	2.2	1.46667	0.635085		662500	9.4	9.4	5.6	8.13333	2.19393		662500	0.4	1	1	0.8	0.34641
	663000	7.8	7.8	8.4	8	0.34641		663000	1.3	1.3	4.1	2.23333	1.61658		663000	15.3	13.4	9.6	12.7667	2.9023		663000	0.7	2.2	2.2	1.7	0.866025
	663500	1.9	1.9	2.6	2.13333	0.404145		663500	2.9	2.9	7.2	4.33333	2.48261		663500	11.8	11.8	5.8	9.8	3.4641		663500	0.8	7.6	7.6	5.33333	3.92598
	664000	0.9	0.9	0.9	0.9	0		664000	2.3	2.3	10.1	4.9	4.50333		664000	20.7	13.2	6.2	13.3667	7.25144		664000	0.8	3	3	2.26667	1.27017
	664500	2.1	2.1	1.1	1.76667	0.57735		664500	3	3	4	3.33333	0.57735		664500	14.6	14.6	6.7	11.9667	4.56107		664500	2	4.1	4.1	3.4	1.21244
	665000	1	1	0.6	0.866667	0.23094		665000	1.3	1.3	2.2	1.6	0.519615		665000	6.5	6.5	5.2	6.06667	0.750555		665000	1.4	1.5	1.5	1.46667	0.057735
	665500	0.6	0.6	0.6	0.6	0		665500	1.3	1.3	2.6	1.73333	0.750555		665500	14.8	9.9	7.4	10.7	3.76431		665500	0.5	0.6	0.6	0.566667	0.057735
	666000	0.6	0.6	0.6	0.6	0		666000	1.9	1.9	2.4	2.06667	0.288675		666000	13.6	11.7	7.1	10.8	3.34215		666000	0.5	0.6	0.6	0.566667	0.057735
	666500	1	1	1.5	1.16667	0.288675		666500	5.1	5.3	7.3	5.9	1.21655		666500	6.8	6.8	3	5.53333	2.19393		666500	0.5	1.1	1	0.866667	0.321455
	667000	4.9	4.9	5.8	5.2	0.519615		667000	2.2	3.4	3.4	3	0.69282		667000	18.3	15	4	12.4333	7.48755		667000	1.6	6.3	5	4.3	2.42693
	667500	4.3	4.3	4.3	4.3	0		667500	3.4	3.4	3.4	3.4	0		667500	18.6	11.7	10	13.4333	4.55448		667500	12.1	12.1	12.1	12.1	0
	668000	4.9	4.9	4.9	4.9	0		668000	7.1	7.1	7.1	7.1	1.08779e-15		668000	13.9	9.1	6.1	9.7	3.93446		668000	6.2	7.5	7.5	7.06667	0.750555
	668500	11.1	11.1	11.1	11.1	0		668500	8.9	8.9	11.5	9.76667	1.50111		668500	9.3	9.3	6.1	8.23333	1.84752		668500	2.2	2.3	2.3	2.26667	0.057735
	669000	5.5	9.6	9.7	8.26667	2.39653		669000	2.8	2.8	5.7	3.76667	1.67432		669000	11.7	11.1	9.5	10.7667	1.13725		669000	3	6.1	6.1	5.06667	1.78979
	669500	1.1	2.2	3.4	2.23333	1.15036		669500	3.2	3.2	5.4	3.93333	1.27017		669500	4.7	3.7	2.8	3.73333	0.950438		669500	0.6	1.2	1.2	1	0.34641
	670000	2	2.7	2.7	2.46667	0.404145		670000	1	1	2.2	1.4	0.69282		670000	3.7	3.7	3.7	3.7	5.43896e-16		670000	0.6	0.8	0.8	0.733333	0.11547
	670500	2.1	2.1	2	2.06667	0.057735		670500	1.4	1.4	3.1	1.96667	0.981495		670500	7.1	7.1	5	6.4	1.21244		670500	0.6	0.8	0.8	0.733333	0.11547
	671000	1.2	1.2	1	1.13333	0.11547		671000	1	1	1	1	0		671000	6.9	6.9	5.1	6.3	1.03923		671000	1.3	2.1	1.6	1.66667	0.404145
	671500	4.2	4.1	3.2	3.83333	0.550757		671500	1.6	1.6	1.6	1.6	2.71948e-16		671500	21.2	17.6	12.3	17.0333	4.47698		671500	0.8	2.3	2.2	1.76667	0.83865
	672000	8.3	6.9	8.3	7.83333	0.80829		672000	1.3	1.3	1.3	1.3	0		672000	15.5	12.7	4.4	10.8667	5.77264		672000	1.5	5.2	5.2	3.96667	2.1362
	672500	2.6	2.6	3.5	2.9	0.519615		672500	2.8	2.8	2.8	2.8	5.43896e-16		672500	9.3	9.3	4.4	7.66667	2.82902		672500	1.7	3.2	2.1	2.33333	0.776745
	673000	2.5	2.5	2.5	2.5	0		673000	1.4	1.4	1.4	1.4	2.71948e-16		673000	14.9	11.6	6.8	11.1	4.07308		673000	0.8	2	1.4	1.4	0.6
	673500	1.7	1.7	2.4	1.93333	0.404145		673500	1.5	1.5	1.5	1.5	0		673500	16.2	16.2	11.4	14.6	2.77128		673500	0.8	2.5	2.5	1.93333	0.981495
	674000	1	1	2	1.33333	0.57735		674000	0.9	0.9	0.9	0.9	0		674000	6.1	5.8	4.5	5.46667	0.85049		674000	1.1	3	3	2.36667	1.09697
	674500	2	2	2.9	2.3	0.519615		674500	1.3	1.3	1.3	1.3	0		674500	9	7.5	4.5	7	2.29129		674500	0.6	1.2	1.2	1	0.34641
	675000	1.2	1.2	1.2	1.2	0		675000	1.4	1.4	3.1	1.96667	0.981495		675000	10.6	8.8	6.6	8.66667	2.00333		675000	0.6	1.1	1.1	0.933333	0.288675
	675500	1.7	1.7	1.7	1.7	0		675500	1.1	1.1	2.3	1.5	0.69282		675500	7.5	7.5	2.9	5.96667	2.65581		675500	0.5	1.6	1.6	1.23333	0.635085
	676000	7.2	7.2	7.3	7.23333	0.057735		676000	1.6	1.6	2.4	1.86667	0.46188		676000	11	9.1	2.3	7.46667	4.5742		676000	0.4	2	2	1.46667	0.92376
	676500	4.3	4.3	6	4.86667	0.981495		676500	2.2	2.2	2.2	2.2	0		676500	15.1	13.4	11.3	13.2667	1.90351		676500	0.4	1.7	1.7	1.26667	0.750555
	677000	2.7	2.7	2.9	2.76667	0.11547		677000	4.3	5.1	9.5	6.3	2.8		677000	18.3	18.3	5.5	14.0333	7.39008		677000	0.4	1.6	1.6	1.2	0.69282
	677500	1	1	1.1	1.03333	0.057735		677500	1.1	1.5	5	2.53333	2.14554		677500	11.1	8.3	6.3	8.56667	2.41109		677500	0.4	1.5	1.5	1.13333	0.635085
	678000	1.2	1.2	1.8	1.4	0.34641		678000	1.3	1.9	3.8	2.33333	1.30512		678000	16.6	13.6	6.2	12.1333	5.35288		678000	1.2	3.6	3.6	2.8	1.38564
	678500	2.8	2.8	2.8	2.8	5.43896e-16		678500	1.5	1.5	1.5	1.5	0		678500	14.6	12.8	11	12.8	1.8		678500	0.9	2	2	1.63333	0.635085
	679000	2	2	2	2	0		679000	5.7	6.4	6.4	6.16667	0.404145		679000	14.6	14.6	9.1	12.7667	3.17543		679000	1.1	2.5	2.5	2.03333	0.80829
	679500	1.1	1.1	1.1	1.1	0		679500	3.7	3.7	3.7	3.7	5.43896e-16		679500	17.8	11.8	11.5	13.7	3.55387		679500	1.5	3.9	3.9	3.1	1.38564
	680000	3.1	3.1	3.1	3.1	0		680000	2.6	2.6	2.6	2.6	0		680000	12.4	10.9	6	9.76667	3.34714		680000	1.9	3.7	3.7	3.1	1.03923
	680500	1.3	1.3	1.3	1.3	0		680500	8.8	8.8	9.5	9.03333	0.404145		680500	11.3	10.2	5.2	8.9	3.25115		680500	1.7	3.2	3.2	2.7	0.866025
	681000	2.4	2.4	3.2	2.66667	0.46188		681000	4.4	4.4	5.5	4.76667	0.635085		681000	5.1	5.1	1.5	3.9	2.07846		681000	3.7	5.5	5.5	4.9	1.03923
	681500	2.6	2.6	2.6	2.6	0		681500	3.9	3.9	3.9	3.9	0		681500	16.2	12.6	2.5	10.4333	7.10235		681500	2.3	5	5	4.1	1.55885
	682000	2	2	2	2	0		682000	7.9	7.9	7.9	7.9	1.08779e-15		682000	12.8	10.2	2.8	8.6	5.18845		682000	0.8	2.1	2.1	1.66667	0.750555
	682500	1.3	1.3	1.3	1.3	0		682500	2.9	2.9	3	2.93333	0.057735		682500	8	8	5.3	7.1	1.55885		682500	0.5	1	1	0.833333	0.288675
	683000	2.2	2.2	2.2	2.2	0		683000	1.6	1.6	2.4	1.86667	0.46188		683000	8.9	8.9	5.1	7.63333	2.19393		683000	0.5	1.4	1.4	1.1	0.519615
	683500	2.9	2.9	3.9	3.23333	0.57735		683500	3	3	3	3	0		683500	10.5	7	4.1	7.2	3.20468		683500	0.5	3.9	3.9	2.76667	1.96299
	684000	1.4	1.4	3.4	2.06667	1.1547		684000	3.6	3.6	3.6	3.6	0		684000	14.4	10	5.3	9.9	4.55082		684000	0.7	3.4	2.5	2.2	1.37477
	684500	3.5	3.5	7.8	4.93333	2.48261		684500	4.2	6	4.2	4.8	1.03923		684500	14.5	11.8	9.2	11.8333	2.65016		684500	1.3	1.3	1	1.2	0.173205
	685000	1.9	2.9	3.9	2.9	1		685000	9.1	12.2	10.7	10.6667	1.55027		685000	10.4	10.1	9.3	9.93333	0.568624		685000	4.6	4.6	3.2	4.13333	0.80829
	685500	5.2	5.8	5.8	5.6	0.34641		685500	14.8	14.8	14.8	14.8	2.17558e-15		685500	4.9	4.9	3.7	4.5	0.69282		685500	2.4	4.8	4.8	4	1.38564
	686000	2.4	2.4	2.4	2.4	0		686000	3.5	3.5	3.5	3.5	0		686000	4.9	4.9	3	4.26667	1.09697		686000	4.1	5.6	4.5	4.73333	0.776745
	686500	1.4	1.4	1.4	1.4	2.71948e-16		686500	2	2	2	2	0		686500	11.5	10.1	8.6	10.0667	1.45029		686500	10	10	8.6	9.53333	0.80829
	687000	1.6	1.6	2.5	1.9	0.519615		687000	1.1	1.1	1.1	1.1	0		687000	12.8	9.6	9.6	10.6667	1.84752		687000	3	3	2.9	2.96667	0.057735
	687500	1.4	1.4	1.5	1.43333	0.057735		687500	3.2	3.2	3.2	3.2	5.43896e-16		687500	19.2	17.5	5.2	13.9667	7.63959		687500	1.1	1.1	1.1	1.1	0
	688000	1	1	1	1	0		688000	1.3	1.6	2.4	1.76667	0.568624		688000	7	5.4	3.7	5.36667	1.65025		688000	4	4	2.6	3.53333	0.80829
	688500	2.9	2.9	3	2.93333	0.057735		688500	0.9	1.2	2.5	1.53333	0.85049		688500	11.9	11.6	8.7	10.7333	1.7673		688500	7.3	9.2	9.2	8.56667	1.09697
	689000	4.7	4.7	4.6	4.66667	0.057735		689000	1.5	2	4.1	2.53333	1.37961		689000	8.2	7.2	5.1	6.83333	1.58219		689000	2.7	6.3	6.3	5.1	2.07846
	689500	5.3	5.3	4.3	4.96667	0.57735		689500	1.2	1.2	2.4	1.6	0.69282		689500	8.4	8.4	8.1	8.3	0.173205		689500	0.7	1.9	1.9	1.5	0.69282
	690000	1.4	1.4	1.4	1.4	2.71948e-16		690000	3.4	3.9	4.3	3.86667	0.450925		690000	12.4	10.2	6.8	9.8	2.82135		690000	0.7	1.9	1.9	1.5	0.69282
	690500	3	3	3.1	3.03333	0.057735		690500	1.4	1.4	1.4	1.4	2.71948e-16		690500	15.8	7.9	5.6	9.76667	5.35008		690500	0.7	1.8	1.8	1.43333	0.635085
	691000	1.3	1.3	1.4	1.33333	0.057735		691000	5	5	5.9	5.3	0.519615		691000	16	12.4	6.4	11.6	4.84974		691000	0.7	1.5	1.5	1.23333	0.46188
	691500	1.6	1.6	2.5	1.9	0.519615		691500	3.6	3.6	3.6	3.6	0		691500	15	12.7	6.1	11.2667	4.61988		691500	0.9	1.3	1.3	1.16667	0.23094
	692000	2.3	2.3	2.3	2.3	0		692000	2.3	2.3	2.3	2.3	0		692000	11.8	11.8	7.1	10.2333	2.71355		692000	1	1	1	1	0
	692500	2.6	2.6	2.6	2.6	0		692500	1.3	1.4	2	1.56667	0.378594		692500	11.2	11.2	8.3	10.2333	1.67432		692500	0.9	1.1	1.1	1.03333	0.11547
	693000	3.3	3.3	3.3	3.3	5.43896e-16		693000	1.4	2.8	1.8	2	0.72111		693000	13.7	13.7	5	10.8	5.02295		693000	0.8	1.2	1.2	1.06667	0.23094
	693500	6.6	6.6	6.6	6.6	1.08779e-15		693500	9	17.4	10	12.1333	4.58839		693500	17.2	13.8	9.8	13.6	3.70405		693500	0.8	1.7	1.7	1.4	0.519615
	694000	3	3	2	2.66667	0.57735		694000	2.4	3.6	2.4	2.8	0.69282		694000	16	15.8	7.5	13.1	4.85077		694000	1.8	6.3	6.3	4.8	2.59808
	694500	6.1	6.1	3.6	5.26667	1.44338		694500	2	2.6	2.7	2.43333	0.378594		694500	7.7	5.8	3.8	5.76667	1.95021		694500	3	8.4	8.4	6.6	3.11769
	695000	3.8	3.8	1.3	2.96667	1.44338		695000	1.7	1.7	1.7	1.7	0		695000	19.6	13.6	10.2	14.4667	4.75955		695000	0.9	3	3	2.3	1.21244
	695500	7	7	4.9	6.3	1.21244		695500	1.5	1.5	1.5	1.5	0		695500	13.5	13.5	8.7	11.9	2.77128		695500	0.4	0.9	0.9	0.733333	0.288675
	696000	2.2	2.2	2.2	2.2	0		696000	3.3	3.3	3.9	3.5	0.34641		696000	11.1	8.3	5.8	8.4	2.65141		696000	0.4	0.6	0.6	0.533333	0.11547
	696500	2.1	2.1	2.1	2.1	0		696500	1.5	1.5	3.1	2.03333	0.92376		696500	11.4	7.6	6.1	8.36667	2.73191		696500	0.4	0.6	0.6	0.533333	0.11547
	697000	9.5	9.5	8.1	9.03333	0.80829		697000	2	2.6	4.5	3.03333	1.30512		697000	17.2	17.2	12.1	15.5	2.94449		697000	0.4	0.6	0.6	0.533333	0.11547
	697500	3.5	3.5	3.5	3.5	0		697500	2.1	2.5	3.6	2.73333	0.776745		697500	19.4	14.1	9.4	14.3	5.003		697500	0.4	1.4	1.4	1.06667	0.57735
	698000	1.6	1.6	1.6	1.6	2.71948e-16		698000	3.8	3.8	5	4.2	0.69282		698000	21.2	14.7	7.5	14.4667	6.85298		698000	2	5.8	5.8	4.53333	2.19393
	698500	2.5	2.5	2.5	2.5	0		698500	3.6	3.6	6	4.4	1.38564		698500	9.8	7.6	5.2	7.53333	2.30072		698500	0.9	1.1	1.1	1.03333	0.11547
	699000	1.1	1.1	1.1	1.1	0		699000	7.8	7.8	9.3	8.3	0.866025		699000	6.3	6.3	6.3	6.3	0		699000	5.1	6.3	5.6	5.66667	0.602771
	699500	1.2	1.2	1.2	1.2	0		699500	3	3	4	3.33333	0.57735		699500	15.7	14.1	5	11.6	5.77148		699500	7.4	13.1	11.6	10.7	2.95466
	700000	2.1	2.1	2.1	2.1	0		700000	1.8	1.8	2	1.86667	0.11547		700000	6.1	5.5	2.3	4.63333	2.04287		700000	1.8	3.6	3.6	3	1.03923
	700500	4.4	4.4	4.4	4.4	0		700500	3.6	3.9	3.6	3.7	0.173205		700500	3.9	2	2	2.63333	1.09697		700500	5.7	7.7	4.5	5.96667	1.61658
	701000	1.8	1.4	1.4	1.53333	0.23094		701000	2.4	3	3.8	3.06667	0.702377		701000	15.7	9.8	9.8	11.7667	3.40637		701000	1.8	2	1	1.6	0.52915
	701500	2.4	1.2	1.2	1.6	0.69282		701500	1	1	2.3	1.43333	0.750555		701500	17.3	12.1	10.1	13.1667	3.71663		701500	5.1	5.1	3.9	4.7	0.69282
	702000	2	1.4	2	1.8	0.34641		702000	1.5	1.5	3.2	2.06667	0.981495		702000	18.3	14.6	4	12.3	7.42226		702000	2.4	4.1	4.1	3.53333	0.981495
	702500	1.9	2	2.2	2.03333	0.152753		702500	3.5	5.3	3.5	4.1	1.03923		702500	12.4	12.4	3	9.26667	5.42709		702500	0.8	1.6	1.6	1.33333	0.46188
	703000	5.1	6.8	6.8	6.23333	0.981495		703000	8.6	10.3	8.6	9.16667	0.981495		703000	13.1	11.2	7.5	10.6	2.84781		703000	1.9	6.1	6.1	4.7	2.42487
	703500	9.2	9.2	9.2	9.2	0		703500	13.6	13.6	17.8	15	2.42487		703500	16.1	12.9	3.7	10.9	6.43739		703500	0.7	2.2	2.2	1.7	0.866025
	704000	6.5	7.8	6.5	6.93333	0.750555		704000	4.3	4.3	5.8	4.8	0.866025		704000	9.6	5.1	3.6	6.1	3.1225		704000	0.7	1.1	1.1	0.966667	0.23094
	704500	12.5	12.5	16.1	13.7	2.07846		704500	2.5	2.5	3.8	2.93333	0.750555		704500	14.5	8.7	4.4	9.2	5.06853		704500	1	1.3	1.3	1.2	0.173205
	705000	2.4	2.4	2.4	2.4	0		705000	2.3	3.2	6.1	3.86667	1.98578		705000	12.9	11	6	9.96667	3.56417		705000	5.1	5.9	5.9	5.63333	0.46188
	705500	2.1	2.1	2.1	2.1	0		705500	1.5	2.2	1.6	1.76667	0.378594		705500	6.3	6.1	4.3	5.56667	1.10151		705500	3.2	3.5	3.5	3.4	0.173205
	706000	3.8	3.8	3.8	3.8	5.43896e-16		706000	1.5	3.6	3.6	2.9	1.21244		706000	15.2	13.7	7.6	12.1667	4.02534		706000	2.4	3	3	2.8	0.34641
	706500	2.6	2.6	3.4	2.86667	0.46188		706500	1.2	2.4	2.4	2	0.69282		706500	13	9.7	4.9	9.2	4.07308		706500	8.8	10.2	10.2	9.73333	0.80829
	707000	1.4	1.4	2	1.6	0.34641		707000	1.5	1.6	1.6	1.56667	0.057735		707000	10.4	10.4	5.9	8.9	2.59808		707000	2.3	2.6	2.6	2.5	0.173205
	707500	1.4	1.4	4.1	2.3	1.55885		707500	1.5	1.5	2.6	1.86667	0.635085		707500	18.1	16.4	10.7	15.0667	3.87599		707500	3.6	6.8	6.8	5.73333	1.84752
	708000	3.5	3.5	9	5.33333	3.17543		708000	1.2	1.2	2.3	1.56667	0.635085		708000	10.8	8.8	6	8.53333	2.41109		708000	1	1.9	1.9	1.6	0.519615
	708500	2.6	2.6	2.6	2.6	0		708500	1.6	1.6	4.3	2.5	1.55885		708500	11.5	8.2	3.2	7.63333	4.17892		708500	1	1.4	1.4	1.26667	0.23094
	709000	5.2	6.2	6.2	5.86667	0.57735		709000	1.1	1.1	2.3	1.5	0.69282		709000	11.6	5.4	2.7	6.56667	4.56326		709000	1.1	1.2	1.2	1.16667	0.057735
	709500	7.6	7.6	7.6	7.6	1.08779e-15		709500	3.1	3.1	4	3.4	0.519615		709500	8.9	8.6	3.3	6.93333	3.15013		709500	1.7	3.4	3.4	2.83333	0.981495
	710000	1.4	1.4	1.6	1.46667	0.11547		710000	14.7	14.7	16.5	15.3	1.03923		710000	13.1	13.1	11.2	12.4667	1.09697		710000	3.4	3.4	2.9	3.23333	0.288675
	710500	1.2	1.2	2.4	1.6	0.69282		710500	1.6	1.6	2.2	1.8	0.34641		710500	11.3	10.2	7.9	9.8	1.73494		710500	0.6	0.6	0.6	0.6	0
	711000	4.6	4.6	10.2	6.46667	3.23316		711000	0.9	0.9	1.7	1.16667	0.46188		711000	6.3	4.7	2.5	4.5	1.90788		711000	0.6	0.6	0.6	0.6	0
	711500	12.3	12.3	14	12.8667	0.981495		711500	1.3	1.3	2.9	1.83333	0.92376		711500	7.3	5.7	4	5.66667	1.65025		711500	1.2	1.2	1.2	1.2	0
	712000	2.4	2.4	5.8	3.53333	1.96299		712000	2.5	3.3	3.1	2.96667	0.416333		712000	9.2	9.2	9.2	9.2	0		712000	1.3	1.5	1.5	1.43333	0.11547
	712500	1.2	1.2	3.5	1.96667	1.32791		712500	8	8	9.7	8.56667	0.981495		712500	8.5	5.7	5.7	6.63333	1.61658		712500	0.7	0.8	0.8	0.766667	0.057735
	713000	2.3	2.3	2.1	2.23333	0.11547		713000	4.8	8.2	7.9	6.96667	1.88237		713000	9.6	9.6	5.5	8.23333	2.36714		713000	1.4	2.1	2.1	1.86667	0.404145
	713500	1.2	1.2	0.7	1.03333	0.288675		713500	1.2	2.4	3.2	2.26667	1.00664		713500	14.4	14.4	8.8	12.5333	3.23316		713500	1.5	1.5	1.5	1.5	0
	714000	1.4	1.4	0.7	1.16667	0.404145		714000	1.6	2.2	3.4	2.4	0.916515		714000	9.1	8.5	8.2	8.6	0.458258		714000	0.5	0.5	0.5	0.5	0
	714500	4.6	4.6	2.8	4	1.03923		714500	1.7	2.6	1.7	2	0.519615		714500	12.8	10	5	9.26667	3.95137		714500	0.5	0.5	0.5	0.5	0
	715000	6.3	6.3	6.3	6.3	0		715000	2.6	3.5	3.4	3.16667	0.493288		715000	7.8	6.3	1.6	5.23333	3.23471		715000	2	2	2	2	0
	715500	11.1	11.1	13	11.7333	1.09697		715500	2.3	2.3	3.6	2.73333	0.750555		715500	11.5	9.7	4.9	8.7	3.41174		715500	3.7	3.7	3.7	3.7	5.43896e-16
	716000	13.2	13.2	13.2	13.2	2.17558e-15		716000	2.3	2.3	5.8	3.46667	2.02073		716000	6.7	6.7	4.2	5.86667	1.44338		716000	1	1	1	1	0
	716500	4.6	4.6	4.6	4.6	0		716500	5.3	5.3	6.6	5.73333	0.750555		716500	1.4	1.4	1.2	1.33333	0.11547		716500	1.1	1.2	1.2	1.16667	0.057735
	717000	6.8	6.8	7.8	7.13333	0.57735		717000	1.5	1.5	2.9	1.96667	0.80829		717000	6.1	5.2	3.9	5.06667	1.10604		717000	1.3	2.6	2.6	2.16667	0.750555
	717500	7.1	7.1	7.1	7.1	1.08779e-15		717500	6.4	6.4	11.9	8.23333	3.17543		717500	14.9	13.1	5.6	11.2	4.93254		717500	1	3.8	3.8	2.86667	1.61658
	718000	6.6	6.6	6.6	6.6	1.08779e-15		718000	11.7	11.7	13.4	12.2667	0.981495		718000	14.8	9	5.9	9.9	4.51774		718000	0.8	1.5	1.5	1.26667	0.404145
	718500	2.1	2.1	2.1	2.1	0		718500	2.2	2.2	2.4	2.26667	0.11547		718500	8.1	8.1	4	6.73333	2.36714		718500	1	1.5	1.4	1.3	0.264575
	719000	2.5	2.5	2.5	2.5	0		719000	2	2	2.9	2.3	0.519615		719000	8.2	8.2	4.6	7	2.07846		719000	1.4	1.4	1.3	1.36667	0.057735
	719500	2.8	2.8	2.8	2.8	5.43896e-16		719500	5.3	5.3	5.3	5.3	0		719500	14.7	11.1	10	11.9333	2.45832		719500	1.9	2.2	1.4	1.83333	0.404145
	720000	1.6	2.5	2.5	2.2	0.519615		720000	7.4	7.4	7.4	7.4	1.08779e-15		720000	9.5	5.4	4	6.3	2.85832		720000	2.2	3.3	3.3	2.93333	0.635085
	720500	0.8	1.6	1.6	1.33333	0.46188		720500	11.1	11.1	12.7	11.6333	0.92376		720500	9.5	7.6	5.3	7.46667	2.10317		720500	9.2	9.2	8.8	9.06667	0.23094
	721000	0.8	1.4	1.4	1.2	0.34641		721000	10.5	10.5	12.3	11.1	1.03923		721000	14.5	9.4	7.3	10.4	3.7027		721000	9.1	9.1	7.8	8.66667	0.750555
	721500	1.2	1.7	1.7	1.53333	0.288675		721500	7.1	8.9	7.1	7.7	1.03923		721500	10.7	6.1	2.7	6.5	4.01497		721500	2.8	3.7	3.7	3.4	0.519615
	722000	2.4	2.4	2.4	2.4	0		722000	2.6	2.6	2.9	2.7	0.173205		722000	11	11	8.1	10.0333	1.67432		722000	1	1.3	1.3	1.2	0.173205
	722500	2.3	2.3	2.3	2.3	0		722500	1.4	1.4	2.8	1.86667	0.80829		722500	13.2	13.2	12.2	12.8667	0.57735		722500	2.5	4.1	4.1	3.56667	0.92376
	723000	13.5	13.5	15	14	0.866025		723000	1.7	1.7	4.9	2.76667	1.84752		723000	10.3	8.8	5.7	8.26667	2.34592		723000	1	2	2	1.66667	0.57735
	723500	14.2	14.2	14.2	14.2	2.17558e-15		723500	2	2.7	3.2	2.63333	0.602771		723500	9.9	9.9	5.7	8.5	2.42487		723500	2	2.4	2.4	2.26667	0.23094
	724000	4.3	4.3	4.3	4.3	0		724000	1.4	1.4	4.1	2.3	1.55885		724000	14.4	11.2	8	11.2	3.2		724000	2.3	3.1	3.1	2.83333	0.46188
	724500	3.1	3.9	3.9	3.63333	0.46188		724500	4.3	4.4	7.5	5.4	1.81934		724500	8.3	8.3	6.2	7.6	1.21244		724500	0.8	1.2	1.2	1.06667	0.23094
	725000	5.1	6.8	6.8	6.23333	0.981495		725000	5.9	6.9	7.9	6.9	1		725000	16.9	13.2	7.3	12.4667	4.84183		725000	1	2	2	1.66667	0.57735
	725500	3.4	3.4	3.4	3.4	0		725500	1.8	1.8	1.9	1.83333	0.057735		725500	13.9	10.2	8.1	10.7333	2.93655		725500	2.7	3.7	3.7	3.36667	0.57735
	726000	4.1	4.1	4.1	4.1	0		726000	4.4	4.4	4.4	4.4	0		726000	13.3	11.6	5.6	10.1667	4.04516		726000	5.7	9.7	9.7	8.36667	2.3094
	726500	10.8	10.8	11.3	10.9667	0.288675		726500	9.8	9.8	9.8	9.8	0		726500	11.6	9.5	4.1	8.4	3.86911		726500	0.4	2	2	1.46667	0.92376
	727000	3.4	3.4	5.1	3.96667	0.981495		727000	6.8	6.8	8.1	7.23333	0.750555		727000	9.4	8	8	8.46667	0.80829		727000	0.2	0.9	0.9	0.666667	0.404145
	727500	4.6	4.6	4.6	4.6	0		727500	3.1	3.1	7.9	4.7	2.77128		727500	8.6	8.6	8.6	8.6	0		727500	0.2	1.3	1.3	0.933333	0.635085
	728000	3.8	3.8	3.8	3.8	5.43896e-16		728000	1	1	2.1	1.36667	0.635085		728000	11.6	10.2	5.8	9.2	3.02655		728000	0.2	1.7	1.7	1.2	0.866025
	728500	1.1	1.1	1.1	1.1	0		728500	1.4	1.4	1.9	1.56667	0.288675		728500	20.6	13.4	7.1	13.7	6.755		728500	0.2	0.9	0.9	0.666667	0.404145
	729000	2.9	2.9	2.9	2.9	0		729000	2.2	2.6	3.4	2.73333	0.61101		729000	13	8.7	5.6	9.1	3.71618		729000	0.2	0.9	0.9	0.666667	0.404145
	729500	13.2	13.2	13.2	13.2	2.17558e-15		729500	1.1	2.1	3.2	2.13333	1.0504		729500	17.2	14.1	9.9	13.7333	3.66379		729500	0.2	1.3	1.3	0.933333	0.635085
	730000	14.9	14.9	17.2	15.6667	1.32791		730000	2	5	4.5	3.83333	1.60728		730000	10.5	8.7	4.1	7.76667	3.30051		730000	0.2	1.3	1.3	0.933333	0.635085
	730500	3.1	3.1	3.9	3.36667	0.46188		730500	3.5	3.5	4.4	3.8	0.519615		730500	9.2	9.2	3.8	7.4	3.11769		730500	0.2	0.9	0.9	0.666667	0.404145
	731000	1.1	1.1	1.1	1.1	0		731000	4.4	4.4	4.4	4.4	0		731000	8.6	8.6	7.8	8.33333	0.46188		731000	1	3.9	3.9	2.93333	1.67432
	731500	1.7	1.7	1.7	1.7	0		731500	6.2	7.8	10.4	8.13333	2.11975		731500	16.4	12	6.4	11.6	5.01199		731500	3.2	3.2	2.1	2.83333	0.635085
	732000	1.3	1.3	1.3	1.3	0		732000	2.1	2.8	2.8	2.56667	0.404145		732000	17	11.2	7.4	11.8667	4.8346		732000	2.2	3.3	3.2	2.9	0.608276
	732500	2.2	2.2	2.2	2.2	0		732500	1.3	1.3	1.3	1.3	0		732500	9.9	5.9	4.6	6.8	2.76225		732500	1.8	1.8	1.4	1.66667	0.23094
	733000	11.6	11.6	11.6	11.6	0		733000	4.1	4.1	4.1	4.1	0		733000	9.6	8.2	4.1	7.3	2.85832		733000	1.7	1.7	0.8	1.4	0.519615
	733500	14.4	14.4	14.4	14.4	0		733500	3.7	3.9	7.2	4.93333	1.96554		733500	7.9	7.9	4.4	6.73333	2.02073		733500	1.9	2.9	1	1.93333	0.950438
	734000	3.9	5.3	5.3	4.83333	0.80829		734000	0.8	0.9	3.4	1.7	1.47309		734000	13.8	10.8	8.7	11.1	2.5632		734000	2.2	3.4	3.4	3	0.69282
	734500	4.6	4.6	4.6	4.6	0		734500	2.1	2.8	8.3	4.4	3.39559		734500	16.3	16.3	12.2	14.9333	2.36714		734500	7.6	7.6	5.5	6.9	1.21244
	735000	2.4	2.4	2.4	2.4	0		735000	4.6	4.6	8	5.73333	1.96299		735000	11.9	11.9	5.1	9.63333	3.92598		735000	2.5	3.8	2.5	2.93333	0.750555
	735500	2.4	2.4	2.4	2.4	0		735500	2.1	2.1	3.3	2.5	0.69282		735500	8.1	7.9	2.6	6.2	3.11929		735500	1.7	1.9	1.9	1.83333	0.11547
	736000	10.5	10.5	10.5	10.5	0		736000	11.4	11.4	11.4	11.4	0		736000	13.8	9.8	3.9	9.16667	4.98029		736000	0.5	0.5	0.5	0.5	0
	736500	3.1	3.1	3.1	3.1	0		736500	15	15	16.9	15.6333	1.09697		736500	18.2	14	9.4	13.8667	4.40151		736500	0.5	0.5	0.5	0.5	0
	737000	5	5	3.4	4.46667	0.92376		737000	3.7	7.8	7.8	6.43333	2.36714		737000	15.4	10.8	7.4	11.2	4.01497		737000	0.5	0.5	0.5	0.5	0
	737500	4.2	5	4	4.4	0.52915		737500	1.1	3.4	2.2	2.23333	1.15036		737500	18.5	8.9	4.5	10.6333	7.15914		737500	2.9	2.9	2.9	2.9	0
	738000	2.7	4	4	3.56667	0.750555		738000	2.3	3	2.7	2.66667	0.351188		738000	8.5	6.3	6.2	7	1.3		738000	3.4	3.5	2.6	3.16667	0.493288
	738500	4.1	4.1	4.1	4.1	0		738500	2.3	2.3	2.3	2.3	0		738500	7.8	4.4	4.4	5.53333	1.96299		738500	1.8	1.9	1.5	1.73333	0.208167
	739000	1.1	1.1	1.1	1.1	0		739000	1.5	1.5	1.6	1.53333	0.057735		739000	13.5	9.5	6.6	9.86667	3.46458		739000	3.8	5.5	4.9	4.73333	0.862168
	739500	4	4	4	4	0		739500	4.8	4.8	5.7	5.1	0.519615		739500	16.8	15.3	6.1	12.7333	5.79339		739500	7	13.9	12.2	11.0333	3.5949
	740000	6	6	10.8	7.6	2.77128		740000	3.9	3.9	5.2	4.33333	0.750555		740000	6.4	5.1	4.9	5.46667	0.814453		740000	2.4	2.8	2.8	2.66667	0.23094
	740500	1.1	1.1	2.1	1.43333	0.57735		740500	1.5	2.2	2.2	1.96667	0.404145		740500	7.2	3.9	2.5	4.53333	2.41316		740500	1.1	3.5	2.8	2.46667	1.23423
	741000	1.5	1.5	2.2	1.73333	0.404145		741000	1.7	1.7	1.8	1.73333	0.057735		741000	6.2	6.1	3.1	5.13333	1.76163		741000	1	2.4	2	1.8	0.72111
	741500	5.3	5.3	5.3	5.3	0		741500	2.2	2.2	3.2	2.53333	0.57735		741500	14.5	12.9	12.9	13.4333	0.92376		741500	2.4	5.2	3.5	3.7	1.41067
	742000	2	2	2.8	2.26667	0.46188		742000	7.6	7.6	10.8	8.66667	1.84752		742000	14.1	14.1	6.3	11.5	4.50333		742000	5.3	7.1	7.1	6.5	1.03923
	742500	0.8	0.8	1.5	1.03333	0.404145		742500	1	1	3	1.66667	1.1547		742500	9.8	9.8	8.2	9.26667	0.92376		742500	1.3	3	3	2.43333	0.981495
	743000	1.6	1.6	4.1	2.43333	1.44338		743000	0.6	0.6	1	0.733333	0.23094		743000	12.6	11	11	11.5333	0.92376		743000	0.4	1	1	0.8	0.34641
	743500	3	3	3	3	0		743500	0.6	0.6	1.3	0.833333	0.404145		743500	8.8	8.8	5.3	7.63333	2.02073		743500	0.4	1.6	1.6	1.2	0.69282
	744000	4.4	4.4	4.4	4.4	0		744000	1	1	1.9	1.3	0.519615		744000	11	8.2	5.1	8.1	2.95127		744000	0.4	1.9	1.9	1.4	0.866025
	744500	4.8	4.8	4.8	4.8	0		744500	2.7	2.7	2.8	2.73333	0.057735		744500	12.6	10.5	7.5	10.2	2.5632		744500	0.4	3	1.6	1.66667	1.30128
	745000	1.4	1.4	1.4	1.4	2.71948e-16		745000	6	7.5	9	7.5	1.5		745000	19.1	14	10.9	14.6667	4.14045		745000	0.5	2.3	1.2	1.33333	0.907377
	745500	1.2	1.8	2.2	1.73333	0.503322		745500	7.2	7.2	10.8	8.4	2.07846		745500	14.3	10.7	7.1	10.7	3.6		745500	0.8	2.3	2	1.7	0.793725
	746000	0.6	1.1	2.3	1.33333	0.873689		746000	3.6	3.6	9.2	5.46667	3.23316		746000	11.4	10	4.9	8.76667	3.42101		746000	1.2	2.1	2.1	1.8	0.519615
	746500	0.6	1.1	2	1.23333	0.70946		746500	0.8	0.8	1.6	1.06667	0.46188		746500	8.5	6.3	2.5	5.76667	3.03535		746500	1.2	9.2	9.2	6.53333	4.6188
	747000	1	1.7	2.5	1.73333	0.750555		747000	0.8	0.8	1	0.866667	0.11547		747000	10.8	9.2	5	8.33333	2.99555		747000	0.5	1.8	1.8	1.36667	0.750555
	747500	4.4	4.4	5.4	4.73333	0.57735		747500	1.6	1.6	2.5	1.9	0.519615		747500	10.4	8.6	1.7	6.9	4.59239		747500	0.5	1.2	1.2	0.966667	0.404145
	748000	1.2	1.2	1.7	1.36667	0.288675		748000	6.8	6.8	8.5	7.36667	0.981495		748000	11.7	9.4	3.5	8.2	4.22966		748000	0.5	1.7	1.7	1.3	0.69282
	748500	1.7	1.7	2.4	1.93333	0.404145		748500	12.9	12.9	14.8	13.5333	1.09697		748500	14.9	13.5	11.1	13.1667	1.9218		748500	0.9	2.4	2.4	1.9	0.866025
	749000	6.7	6.7	5.4	6.26667	0.750555		749000	5	5	5	5	0		749000	14.8	12.9	5.8	11.1667	4.74377		749000	5.5	4.4	3	4.3	1.253
	749500	3.6	3.6	3.4	3.53333	0.11547		749500	2	2	2.3	2.1	0.173205		749500	9.7	8.2	5.6	7.83333	2.07445		749500	4.3	4.3	3.2	3.93333	0.635085
	750000	5.9	5.9	2.3	4.7	2.07846		750000	1.7	1.7	2.6	2	0.519615		750000	11.3	9.4	9.4	10.0333	1.09697		750000	5.4	7.5	4.8	5.9	1.41774
	750500	1.4	1.4	2.2	1.66667	0.46188		750500	1.7	1.7	1.7	1.7	0		750500	6.2	3.7	3.7	4.53333	1.44338		750500	0.8	3.1	2.1	2	1.15326
	751000	1.1	1.1	1.8	1.33333	0.404145		751000	1.5	1.5	1.5	1.5	0		751000	5.5	4.1	4.1	4.56667	0.80829		751000	0.6	1.4	1.4	1.13333	0.46188
	751500	4.1	4.1	6.5	4.9	1.38564		751500	1.5	1.5	1.6	1.53333	0.057735		751500	6.6	5.2	4.6	5.46667	1.02632		751500	0.6	1	1	0.866667	0.23094
	752000	4.3	4.3	4.6	4.4	0.173205		752000	6.7	8.5	7.5	7.56667	0.90185		752000	8.5	5.1	3.8	5.8	2.42693		752000	0.6	1.8	1.3	1.23333	0.602771
	752500	1.5	1.5	2.3	1.76667	0.46188		752500	5.1	8.5	6.8	6.8	1.7		752500	6.4	5.2	2.6	4.73333	1.94251		752500	0.8	3.8	1.9	2.16667	1.51767
	753000	1.5	1.5	1.5	1.5	0		753000	2.7	3	3.6	3.1	0.458258		753000	9.5	7.9	5.9	7.76667	1.8037		753000	2.9	5.7	5.5	4.7	1.56205
	753500	5.6	5.6	6.8	6	0.69282		753500	2.8	4.1	4.7	3.86667	0.971253		753500	11	9.4	6.1	8.83333	2.49867		753500	3.1	6.2	4.9	4.73333	1.55671
	754000	6.2	6.2	7.2	6.53333	0.57735		754000	1.3	2.6	4	2.63333	1.35031		754000	10.1	10.1	5.7	8.63333	2.54034		754000	4.4	6.1	3.6	4.7	1.27671
	754500	2.8	2.8	2.8	2.8	5.43896e-16		754500	6.3	10.7	11.4	9.46667	2.76466		754500	13	12.2	8.1	11.1	2.62869		754500	1.5	3	2.7	2.4	0.793725
	755000	5.1	5.1	5.1	5.1	0		755000	7.3	9	8.8	8.36667	0.929157		755000	7.8	6.5	6.5	6.93333	0.750555		755000	1	1.1	1.1	1.06667	0.057735
	755500	5.1	5.1	6.3	5.5	0.69282		755500	1.6	3.1	5	3.23333	1.70392		755500	5.7	5.7	5.3	5.56667	0.23094		755500	0.7	2.3	2.3	1.76667	0.92376
	756000	11.3	11.3	13.2	11.9333	1.09697		756000	0.7	1.2	4	1.96667	1.77858		756000	12.7	12.7	7.2	10.8667	3.17543		756000	0.6	1.3	1.3	1.06667	0.404145
	756500	3.6	3.6	3.6	3.6	0		756500	0.7	1.4	2	1.36667	0.650641		756500	12.2	7.6	4.7	8.16667	3.78197		756500	0.6	1.6	1.6	1.26667	0.57735
	757000	0.9	0.9	0.9	0.9	0		757000	3.4	6.8	6	5.4	1.77764		757000	12.2	9.5	5.4	9.03333	3.42394		757000	0.6	2.1	2.1	1.6	0.866025
	757500	1.1	1.1	0.8	1	0.173205		757500	3.6	3.6	3.6	3.6	0		757500	14.7	12.8	7.3	11.6	3.84318		757500	2.3	4.2	2.8	3.1	0.984886
	758000	1.6	1.6	0.8	1.33333	0.46188		758000	2.5	2.5	2.5	2.5	0		758000	14	14	8.8	12.2667	3.00222		758000	0.8	0.8	0.8	0.8	1.35974e-16
	758500	1.6	1.6	0.8	1.33333	0.46188		758500	8.1	8.1	8.1	8.1	0		758500	7.6	6.2	4.7	6.16667	1.45029		758500	0.8	0.8	0.8	0.8	1.35974e-16
	759000	1.2	1.2	0.9	1.1	0.173205		759000	2.4	3.6	2.4	2.8	0.69282		759000	12.2	9.1	4.6	8.63333	3.82143		759000	1.3	1.9	1.2	1.46667	0.378594
	759500	1	1	1	1	0		759500	2.9	3.5	3.9	3.43333	0.503322		759500	9.4	9.4	6.7	8.5	1.55885		759500	1.2	3.7	3.2	2.7	1.32288
	760000	3.6	3.6	3.6	3.6	0		760000	2.3	2.3	2.5	2.36667	0.11547		760000	13.3	9.5	9.5	10.7667	2.19393		760000	0.9	5.8	5.8	4.16667	2.82902
	760500	9.5	9.5	8.1	9.03333	0.80829		760500	4.6	4.6	4.6	4.6	0		760500	16.8	12.9	11.3	13.6667	2.82902		760500	0.8	2	2	1.6	0.69282
	761000	1.5	1.5	1.5	1.5	0		761000	2.6	2.6	3	2.73333	0.23094		761000	13.9	9.3	6.7	9.96667	3.646		761000	1.9	2.9	1.9	2.23333	0.57735
	761500	1	1	1	1	0		761500	6.2	6.2	7.8	6.73333	0.92376		761500	7.3	7.3	6	6.86667	0.750555		761500	10.2	15.3	10.6	12.0333	2.83608
	762000	5.4	5.4	6	5.6	0.34641		762000	9.9	9.9	9.9	9.9	0		762000	16.6	14.9	6.6	12.7	5.3507		762000	3.1	5.6	3.4	4.03333	1.36504
	762500	5	5	3.7	4.56667	0.750555		762500	2.1	3.1	3.7	2.96667	0.80829		762500	14.6	12.7	12.7	13.3333	1.09697		762500	1.1	4.5	3.8	3.13333	1.79536
	763000	10.1	8.6	5.8	8.16667	2.18251		763000	1.1	3.8	7.4	4.1	3.1607		763000	13.8	12	10.3	12.0333	1.75024		763000	0.7	1.3	1.3	1.1	0.34641
	763500	14.5	14.5	7	12	4.33013		763500	1.1	1.3	3	1.8	1.04403		763500	18.6	14.9	9.3	14.2667	4.68224		763500	0.7	0.8	0.8	0.766667	0.057735
	764000	3.5	3.5	1.8	2.93333	0.981495		764000	4.3	5.2	7.5	5.66667	1.65025		764000	11.2	9.3	7.2	9.23333	2.00083		764000	4.3	5.9	5.3	5.16667	0.80829
	764500	1.3	1.3	1.3	1.3	0		764500	5.5	5.5	7.3	6.1	1.03923		764500	12.7	8.9	5.1	8.9	3.8		764500	4.7	6.3	3.3	4.76667	1.50111
	765000	1	1	1	1	0		765000	4.3	4.3	10.7	6.43333	3.69504		765000	17.6	15.9	10.6	14.7	3.65103		765000	1.9	2.9	1.9	2.23333	0.57735
	765500	2.7	2.7	2.7	2.7	5.43896e-16		765500	3.3	4.3	4.1	3.9	0.52915		765500	18	11.4	8.1	12.5	5.04083		765500	4.5	6.5	6.5	5.83333	1.1547
	766000	3.2	3.2	3.2	3.2	5.43896e-16		766000	4.8	6.3	6.3	5.8	0.866025		766000	13.4	7.6	2.3	7.76667	5.55188		766000	1.5	2.5	2.5	2.16667	0.57735
	766500	0.9	0.9	0.9	0.9	0		766500	8	8	9	8.33333	0.57735		766500	16.4	12.4	5.8	11.5333	5.35288		766500	0.8	0.9	0.9	0.866667	0.057735
	767000	2.6	2.6	2.7	2.63333	0.057735		767000	7.1	7.1	7.1	7.1	1.08779e-15		767000	15.7	11.2	7	11.3	4.35086		767000	1.1	2.1	2.1	1.76667	0.57735
	767500	2.9	2.9	3.9	3.23333	0.57735		767500	8.3	8.3	8.3	8.3	0		767500	8.9	5.9	4.4	6.4	2.29129		767500	0.7	4.5	4.5	3.23333	2.19393
	768000	3.5	3.5	3.8	3.6	0.173205		768000	4.1	4.1	5.4	4.53333	0.750555		768000	12.8	11.5	3.7	9.33333	4.92172		768000	0.7	2.3	2.3	1.76667	0.92376
	768500	1.5	1.5	3	2	0.866025		768500	2.4	2.4	2.6	2.46667	0.11547		768500	9.4	9.2	2.9	7.16667	3.69639		768500	1.2	2	2	1.73333	0.46188
	769000	1.6	1.6	3.7	2.3	1.21244		769000	4.9	5.9	5.9	5.56667	0.57735		769000	18	12.6	6.9	12.5	5.55068		769000	6.1	9	9	8.03333	1.67432
	769500	1.6	1.6	3.2	2.13333	0.92376		769500	9.5	9.5	9.5	9.5	0		769500	9.9	8.7	7.4	8.66667	1.25033		769500	0.9	4.1	2.7	2.56667	1.60416
	770000	6.3	6.3	7.6	6.73333	0.750555		770000	9.6	9.6	9.6	9.6	0		770000	9.9	9	9	9.3	0.519615		770000	0.7	3.3	2.3	2.1	1.31149
	770500	4.9	4.3	4.3	4.5	0.34641		770500	6.9	6.9	7.9	7.23333	0.57735		770500	10.4	10.4	2.4	7.73333	4.6188		770500	0.7	2.8	2.7	2.06667	1.18462
	771000	1.8	1.4	1.4	1.53333	0.23094		771000	2.1	2.1	10.7	4.96667	4.96521		771000	11	9.1	3.5	7.86667	3.89915		771000	1.3	2.7	1.3	1.76667	0.80829
	771500	1.9	1.2	1.3	1.46667	0.378594		771500	1.1	1.1	4.6	2.26667	2.02073		771500	14.1	8.8	5.3	9.4	4.43058		771500	2.6	9.9	3.5	5.33333	3.98037
	772000	1.1	1.1	2.2	1.46667	0.635085		772000	1.8	1.8	3.4	2.33333	0.92376		772000	18.1	10.8	7.2	12.0333	5.55368		772000	0.5	2.2	2.2	1.63333	0.981495
	772500	4.4	4.4	10.8	6.53333	3.69504		772500	5.7	5.7	6.6	6	0.519615		772500	10.9	9.3	6.2	8.8	2.38956		772500	0.5	1.3	1.3	1.03333	0.46188
	773000	3.8	3.8	3.8	3.8	5.43896e-16		773000	1.4	1.4	1.4	1.4	2.71948e-16		773000	12.5	12.5	4.9	9.96667	4.38786		773000	0.5	0.9	0.9	0.766667	0.23094
	773500	1.5	1.5	1.5	1.5	0		773500	6	6	6	6	0		773500	9.7	4.3	3.2	5.73333	3.47898		773500	2.1	3.8	3.8	3.23333	0.981495
	774000	4.9	4.9	4.9	4.9	0		774000	1.7	1.7	1.7	1.7	0		774000	10	10	5.7	8.56667	2.48261		774000	3	5	3.9	3.96667	1.00167
	774500	12.2	12.2	13.7	12.7	0.866025		774500	1	1	1.2	1.06667	0.11547		774500	17.4	13.5	8.6	13.1667	4.40946		774500	3	5.9	3.9	4.26667	1.48436
	775000	8.1	6.5	6.5	7.03333	0.92376		775000	0.7	0.7	1	0.8	0.173205		775000	10.2	7.7	5.7	7.86667	2.25462		775000	5.1	7.1	6.1	6.1	1
	775500	6.3	6.3	6.3	6.3	0		775500	1	1	1.5	1.16667	0.288675		775500	7.2	6	3.4	5.53333	1.94251		775500	1.3	2.2	2.2	1.9	0.519615
	776000	2.3	2.3	2.3	2.3	0		776000	3.1	3.1	3.1	3.1	0		776000	8.3	6.6	1.6	5.5	3.48281		776000	1.5	9	8.7	6.4	4.24617
	776500	0.9	0.9	0.9	0.9	0		776500	11.4	11.4	11.4	11.4	0		776500	16	12.4	4.3	10.9	5.9925		776500	2.1	8.8	7.4	6.1	3.53412
	777000	1.9	1.9	1.9	1.9	2.71948e-16		777000	6.8	6.8	6.8	6.8	0		777000	15.1	13.6	10	12.9	2.62107		777000	4.4	10.3	8.6	7.76667	3.03699
	777500	1.2	1.2	1.2	1.2	0		777500	8.5	9.1	8.5	8.7	0.34641		777500	15.5	10	5.3	10.2667	5.10523		777500	9.7	11	6.6	9.1	2.26053
	778000	5.9	5.9	4.9	5.56667	0.57735		778000	4.5	6.7	4.5	5.23333	1.27017		778000	9.3	7.4	3.7	6.8	2.84781		778000	2.2	3.2	1.1	2.16667	1.0504
	778500	3	3	3	3	0		778500	2.2	2.2	2.2	2.2	0		778500	9.7	9	7	8.56667	1.40119		778500	1.2	2.3	1.4	1.63333	0.585947
	779000	1.7	1.7	2.6	2	0.519615		779000	1.3	1.3	1.9	1.5	0.34641		779000	13.5	8.4	4.4	8.76667	4.56107		779000	1.7	2.6	2.5	2.26667	0.493288
	779500	2.2	2.2	2.1	2.16667	0.057735		779500	1	1	1	1	0		779500	9.8	8.1	2.4	6.76667	3.87599		779500	7	7	3.4	5.8	2.07846
	780000	1.8	1.8	0.9	1.5	0.519615		780000	1.6	1.6	1.7	1.63333	0.057735		780000	7.4	7.3	5.3	6.66667	1.18462		780000	1.9	1.9	0.9	1.56667	0.57735
	780500	1.9	1.9	1.7	1.83333	0.11547		780500	4.5	6	4.5	5	0.866025		780500	10.8	6.1	3.2	6.7	3.83536		780500	3.6	3.6	1.8	3	1.03923
	781000	1.3	1.3	1.6	1.4	0.173205		781000	2.6	2.8	4.4	3.26667	0.986577		781000	11	8.3	1.4	6.9	4.95076		781000	0.9	5.6	5.6	4.03333	2.71355
	781500	1.3	1.3	1.3	1.3	0		781500	1.8	1.8	2.7	2.1	0.519615		781500	25.2	10.1	4.1	13.1333	10.8721		781500	0.5	1	1	0.833333	0.288675
	782000	1.8	1.8	1.6	1.73333	0.11547		782000	2.2	2.2	2.7	2.36667	0.288675		782000	9.5	8.4	7.8	8.56667	0.862168		782000	0.5	0.6	0.6	0.566667	0.057735
	782500	2.3	2.3	2.3	2.3	0		782500	13.6	15.1	13.6	14.1	0.866025		782500	13.9	10.8	8	10.9	2.95127		782500	0.5	0.6	0.6	0.566667	0.057735
	783000	5.9	5.9	5.9	5.9	1.08779e-15		783000	3.1	3.1	4.9	3.7	1.03923		783000	18	14.6	8.4	13.6667	4.86758		783000	0.6	1.4	1.4	1.13333	0.46188
	783500	9.2	9.2	9.2	9.2	0		783500	4.4	4.4	6.6	5.13333	1.27017		783500	9.8	7.4	5.3	7.5	2.25167		783500	0.8	2.8	2.8	2.13333	1.1547
	784000	5.1	5.1	5.1	5.1	0		784000	5.8	6.9	9.3	7.33333	1.78979		784000	11	7.8	4.7	7.83333	3.15013		784000	0.8	3.2	3.2	2.4	1.38564
	784500	3.2	3.2	3.2	3.2	5.43896e-16		784500	4.2	4.2	4.4	4.26667	0.11547		784500	9.7	8.1	8.1	8.63333	0.92376		784500	3.4	6.4	5.1	4.96667	1.50444
	785000	2.8	2.8	3.4	3	0.34641		785000	2.7	2.7	4.1	3.16667	0.80829		785000	7.9	6.4	4.8	6.36667	1.55027		785000	1	1.1	1.1	1.06667	0.057735
	785500	1.4	1.4	1.3	1.36667	0.057735		785500	3.1	3.1	4.5	3.56667	0.80829		785500	9.4	9.1	1.7	6.73333	4.36157		785500	1.3	2.5	2.3	2.03333	0.64291
	786000	6.7	6.7	6.5	6.63333	0.11547		786000	3.4	3.4	4.5	3.76667	0.635085		786000	8.6	4.9	2.3	5.26667	3.16596		786000	2.9	2.9	1.3	2.36667	0.92376
	786500	2.7	2.7	5.3	3.56667	1.50111		786500	3.3	5	3.3	3.86667	0.981495		786500	16.4	11	6.8	11.4	4.81248		786500	12.6	12.6	3.5	9.56667	5.25389
	787000	2.7	2.7	2.8	2.73333	0.057735		787000	3.4	3.7	6.8	4.63333	1.88237		787000	17.5	14.6	7.3	13.1333	5.25579		787000	3.4	7.7	5.8	5.63333	2.15484
	787500	4.3	4.3	6.5	5.03333	1.27017		787500	0.9	0.9	1.7	1.16667	0.46188		787500	7	5.3	3.7	5.33333	1.65025		787500	0.6	1.9	1.9	1.46667	0.750555
	788000	6	6	7	6.33333	0.57735		788000	0.9	0.9	1.4	1.06667	0.288675		788000	16.5	10.7	5.6	10.9333	5.45374		788000	0.6	3.8	3.8	2.73333	1.84752
	788500	1.4	1.4	1.5	1.43333	0.057735		788500	1.9	1.9	3.5	2.43333	0.92376		788500	11.3	8.6	4.7	8.2	3.31813		788500	0.6	3.1	3.1	2.26667	1.44338
	789000	4.4	4.4	5.1	4.63333	0.404145		789000	2.8	2.8	4	3.2	0.69282		789000	9.5	4.8	3.2	5.83333	3.27465		789000	1	4	3.3	2.76667	1.5695
	789500	1.9	1.9	1.9	1.9	2.71948e-16		789500	2.4	2.4	5.6	3.46667	1.84752		789500	10	9.2	6.7	8.63333	1.72143		789500	0.5	0.9	0.9	0.766667	0.23094
	790000	3	3	3.1	3.03333	0.057735		790000	1.5	3	4.3	2.93333	1.40119		790000	11.7	7.7	4.4	7.93333	3.65559		790000	0.5	0.9	0.9	0.766667	0.23094
	790500	2.6	2.6	3.4	2.86667	0.46188		790500	1.3	2.6	4	2.63333	1.35031		790500	10.6	7.6	4.2	7.46667	3.20208		790500	0.5	1	1	0.833333	0.288675
	791000	1.6	1.6	1.6	1.6	2.71948e-16		791000	1.8	2.8	3	2.53333	0.64291		791000	10.3	7.4	5.7	7.8	2.32594		791000	0.5	1	1	0.833333	0.288675
	791500	5.5	5.5	5.5	5.5	0		791500	2.4	3.2	2.8	2.8	0.4		791500	15	11.2	5.1	10.4333	4.99433		791500	0.6	1	1	0.866667	0.23094
	792000	2.1	2.1	2.1	2.1	0		792000	2.6	3.5	3.9	3.33333	0.665833		792000	19.2	11.6	7.1	12.6333	6.11583		792000	0.6	1.3	1.3	1.06667	0.404145
	792500	6.2	6.2	7.5	6.63333	0.750555		792500	7	7	10.5	8.16667	2.02073		792500	8.7	6.5	3.7	6.3	2.50599		792500	0.6	3.3	3.3	2.4	1.55885
	793000	3.5	2.6	3.8	3.3	0.6245		793000	5.7	5.7	5.7	5.7	0		793000	9.6	5.8	2.5	5.96667	3.55293		793000	0.8	6.9	6.9	4.86667	3.52184
	793500	0.9	0.6	1	0.833333	0.208167		793500	1.8	3.4	1.9	2.36667	0.896289		793500	6.8	4.5	2.2	4.5	2.3		793500	0.6	2.9	2.9	2.13333	1.32791
	794000	1.2	0.6	1.2	1	0.34641		794000	1.7	5.1	3.4	3.4	1.7		794000	6.7	6.7	5.9	6.43333	0.46188		794000	0.6	1.4	1.2	1.06667	0.416333
	794500	1.6	0.8	2.7	1.7	0.953939		794500	1.3	1.8	3	2.03333	0.873689		794500	10.8	8	8	8.93333	1.61658		794500	0.6	1.1	0.8	0.833333	0.251661
	795000	1.3	1.3	2.1	1.56667	0.46188		795000	1.8	1.8	2.1	1.9	0.173205		795000	10.4	7.1	5.9	7.8	2.33024		795000	0.8	2.8	2.1	1.9	1.01489
	795500	3.5	3.5	3.1	3.36667	0.23094		795500	4.5	4.5	4.5	4.5	0		795500	9.8	7.5	6	7.76667	1.91398		795500	0.5	6.4	6.4	4.43333	3.40637
	796000	4.1	4.1	4.1	4.1	0		796000	2.7	2.7	3.2	2.86667	0.288675		796000	9.4	4.5	2.5	5.46667	3.55012		796000	0.5	1.9	1.9	1.43333	0.80829
	796500	1.8	1.8	1.8	1.8	0		796500	1.9	1.9	3.4	2.4	0.866025		796500	14.1	10.8	7	10.6333	3.55293		796500	1	2.3	2.3	1.86667	0.750555
	797000	1.9	1.9	2.6	2.13333	0.404145		797000	7.4	7.4	7.4	7.4	1.08779e-15		797000	5.2	5.2	3.5	4.63333	0.981495		797000	3.4	7.9	4.5	5.26667	2.34592
	797500	1	1	1	1	0		797500	3.8	5	5	4.6	0.69282		797500	8.1	8.1	4.3	6.83333	2.19393		797500	0.6	3.2	3.1	2.3	1.47309
	798000	3.7	3.7	3.7	3.7	5.43896e-16		798000	4.2	4.3	4.2	4.23333	0.057735		798000	11.8	11.8	5.1	9.56667	3.86825		798000	0.6	4.4	4.4	3.13333	2.19393
	798500	2.6	2.6	2.6	2.6	0		798500	1.4	1.4	1.4	1.4	2.71948e-16		798500	19.5	16.7	13	16.4	3.26037		798500	1	4.4	2.9	2.76667	1.70392
	799000	0.9	0.9	0.9	0.9	0		799000	5.7	5.7	5.7	5.7	0		799000	13.4	7	4.7	8.36667	4.50814		799000	0.7	1.2	1.2	1.03333	0.288675
	799500	1.4	1.4	1.4	1.4	2.71948e-16		799500	7.2	7.2	7.2	7.2	0		799500	18.1	15.5	7.8	13.8	5.3563		799500	0.7	1.7	1.7	1.36667	0.57735
	800000	7.8	7.8	7.8	7.8	0		800000	4.9	5.7	5.7	5.43333	0.46188		800000	13.4	13.4	5.8	10.8667	4.38786		800000	2.7	6.8	5.4	4.96667	2.08407
	800500	6	7.5	9	7.5	1.5		800500	2.4	2.4	2.4	2.4	0		800500	6.5	6.5	5.2	6.06667	0.750555		800500	9.8	16	12.4	12.7333	3.11341
	801000	10.1	15.6	15.6	13.7667	3.17543		801000	2.1	2.1	4.3	2.83333	1.27017		801000	9.5	8.1	5.1	7.56667	2.24796		801000	3.6	9.6	7.8	7	3.07896
	801500	3.2	4.8	4.8	4.26667	0.92376		801500	0.8	0.8	2.3	1.3	0.866025		801500	18.1	17.8	6.5	14.1333	6.61236		801500	5.8	7.1	5.1	6	1.01489
	802000	12.1	15.9	15.9	14.6333	2.19393		802000	2.7	2.7	6.9	4.1	2.42487		802000	15.9	10	6.5	10.8	4.75079		802000	1.5	2.7	2.7	2.3	0.69282
	802500	5.1	5.1	5.1	5.1	0		802500	9.1	9.1	12.7	10.3	2.07846		802500	22.9	15.9	5.2	14.6667	8.91422		802500	1.5	4.4	4.3	3.4	1.64621
	803000	3.9	3.9	3.9	3.9	0		803000	4.3	4.3	4.3	4.3	0		803000	13.2	10.9	6.6	10.2333	3.35012		803000	3.1	5.2	4.3	4.2	1.05357
	803500	2.3	2.3	3.4	2.66667	0.635085		803500	1.8	1.8	3.9	2.5	1.21244		803500	20	13.3	5.9	13.0667	7.0529		803500	1.6	5.3	5.3	4.06667	2.1362
	804000	2.8	2.8	3	2.86667	0.11547		804000	3	3	6.2	4.06667	1.84752		804000	14.1	14.1	6.6	11.6	4.33013		804000	1	4.7	4.7	3.46667	2.1362
	804500	5.7	5.7	8.4	6.6	1.55885		804500	6.7	6.7	8.3	7.23333	0.92376		804500	7.5	7.5	4.8	6.6	1.55885		804500	5.8	10.9	9	8.56667	2.57747
	805000	2.6	2.6	3.9	3.03333	0.750555		805000	8.3	8.3	12.8	9.8	2.59808		805000	11.1	9.7	8.3	9.7	1.4		805000	2.2	9.5	7.9	6.53333	3.8371
	805500	9.2	9.2	9.2	9.2	0		805500	8.2	8.2	8.2	8.2	0		805500	7.3	6.6	4.4	6.1	1.51327		805500	0.9	3.8	3.8	2.83333	1.67432
	806000	7	7	7	7	0		806000	5.6	7.1	7.1	6.6	0.866025		806000	14	10.5	3.8	9.43333	5.18298		806000	0.8	3.2	2.2	2.06667	1.20554
	806500	2.5	2.5	2.5	2.5	0		806500	2.4	3.7	3.7	3.26667	0.750555		806500	12.6	11	4.7	9.43333	4.17652		806500	0.8	2.4	2.3	1.83333	0.896289
	807000	1.5	1.5	1.5	1.5	0		807000	5.5	6	6.9	6.13333	0.70946		807000	13.4	5.8	3	7.4	5.38145		807000	0.8	2.8	2.8	2.13333	1.1547
	807500	1.6	1.6	1.6	1.6	2.71948e-16		807500	1.8	1.8	3.6	2.4	1.03923		807500	7.8	4.1	1.6	4.5	3.11929		807500	0.8	4.6	4.6	3.33333	2.19393
	808000	4.7	5.8	7	5.83333	1.15036		808000	2.4	2.4	2.8	2.53333	0.23094		808000	13.8	5.2	3.4	7.46667	5.55818		808000	0.9	2.6	2.6	2.03333	0.981495
	808500	12.1	12.1	10.3	11.5	1.03923		808500	5.7	5.7	5.8	5.73333	0.057735		808500	13.9	13.9	12.2	13.3333	0.981495		808500	1.1	2.8	2.8	2.23333	0.981495
	809000	2.8	2.8	2.5	2.7	0.173205		809000	6.3	6.3	14.6	9.06667	4.79201		809000	12.5	7.8	3.1	7.8	4.7		809000	1.2	3.7	3.7	2.86667	1.44338
	809500	0.8	0.8	0.7	0.766667	0.057735		809500	10.8	10.8	12.6	11.4	1.03923		809500	15.1	5.4	3.6	8.03333	6.18574		809500	1.2	1.8	1.8	1.6	0.34641
	810000	1.5	1.5	0.7	1.23333	0.46188		810000	4.5	4.5	4.5	4.5	0		810000	2.5	1.2	1.2	1.63333	0.750555		810000	1.4	4.1	3.2	2.9	1.37477
	810500	4.5	4.5	1.6	3.53333	1.67432		810500	1.8	1.8	3.5	2.36667	0.981495		810500	4.4	3.6	3.6	3.86667	0.46188		810500	4.3	6.1	6.1	5.5	1.03923
	811000	2	2	2.5	2.16667	0.288675		811000	1	1	1.4	1.13333	0.23094		811000	22.1	18.7	18.7	19.8333	1.96299		811000	1.4	2.9	2.9	2.4	0.866025
	811500	4.2	4.2	4.7	4.36667	0.288675		811500	2.1	2.1	3.7	2.63333	0.92376		811500	10.3	8.8	8.8	9.3	0.866025		811500	4.7	11.1	5.5	7.1	3.48712
	812000	2.8	2.8	2.8	2.8	5.43896e-16		812000	2.5	2.5	2.7	2.56667	0.11547		812000	9.6	8	6.4	8	1.6		812000	3.2	3.4	1.7	2.76667	0.929157
	812500	3.4	3.4	3.4	3.4	0		812500	3.4	3.4	3.4	3.4	0		812500	20	13.8	6.6	13.4667	6.70622		812500	2	3.4	3.3	2.9	0.781025
	813000	1.2	1.2	1.2	1.2	0		813000	3.1	3.1	3.1	3.1	0		813000	8.8	8.8	4.2	7.26667	2.65581		813000	1.1	1.6	1.6	1.43333	0.288675
	813500	4.4	4.4	5.3	4.7	0.519615		813500	1.7	2	1.7	1.8	0.173205		813500	6.7	6.7	2.7	5.36667	2.3094		813500	3.8	8.6	7.7	6.7	2.55147
	814000	5.2	5.2	5.2	5.2	0		814000	4.3	5.8	4.3	4.8	0.866025		814000	11.1	9.9	3.6	8.2	4.02865		814000	1.1	5.3	5.3	3.9	2.42487
	814500	7.5	8.4	8.4	8.1	0.519615		814500	5.5	5.5	5.8	5.6	0.173205		814500	6.5	6.5	5.2	6.06667	0.750555		814500	1.5	6.1	4.5	4.03333	2.33524
	815000	1.4	1.5	1.5	1.46667	0.057735		815000	6.1	6.1	7.4	6.53333	0.750555		815000	17.1	12.5	5.6	11.7333	5.78821		815000	5.4	10.7	8.9	8.33333	2.69506
	815500	1	1	1	1	0		815500	12.7	12.7	12.7	12.7	2.17558e-15		815500	20.7	12.9	8	13.8667	6.40495		815500	3	5.5	4.4	4.3	1.253
	816000	1.7	1.7	1.7	1.7	0		816000	7.4	10.8	12.4	10.2	2.55343		816000	6.9	5.2	4.5	5.53333	1.23423		816000	1.2	2.4	2.1	1.9	0.6245
	816500	1.4	1.4	1.4	1.4	2.71948e-16		816500	2.3	3.9	3.5	3.23333	0.832666		816500	11	9.8	9.8	10.2	0.69282		816500	1.4	7.9	6.8	5.36667	3.47898
	817000	4.5	4.5	4.5	4.5	0		817000	2.8	2.8	2.8	2.8	5.43896e-16		817000	18.8	14.5	9.1	14.1333	4.86038		817000	1.5	3.6	3.6	2.9	1.21244
	817500	2.2	2.2	2.2	2.2	0		817500	8.3	8.3	8.3	8.3	0		817500	19.2	12.2	10.5	13.9667	4.61122		817500	4.4	7	5.6	5.66667	1.30128
	818000	1.5	1.5	1.5	1.5	0		818000	5	5	5	5	0		818000	8	6.4	5.9	6.76667	1.09697		818000	8.8	10.6	5.1	8.16667	2.80416
	818500	1.3	1.3	1.4	1.33333	0.057735		818500	3.3	3.3	5.3	3.96667	1.1547		818500	10.5	7.5	6	8	2.29129		818500	1.9	3.9	3.9	3.23333	1.1547
	819000	1.5	1.5	2.3	1.76667	0.46188		819000	2.5	3.3	4.9	3.56667	1.22202		819000	9.2	7.4	5.5	7.36667	1.85023		819000	2	5.5	3.5	3.66667	1.75594
	819500	2.5	2.5	2.6	2.53333	0.057735		819500	1.5	1.5	3.1	2.03333	0.92376		819500	12.2	9.6	8.9	10.2333	1.73877		819500	3.3	4.1	3	3.46667	0.568624
	820000	3.8	3.8	5.1	4.23333	0.750555		820000	6.4	6.4	10.4	7.73333	2.3094		820000	15.2	13.3	9.5	12.6667	2.9023		820000	1.6	1.6	1.6	1.6	2.71948e-16
	820500	4.2	4.2	4.2	4.2	0		820500	5.1	5.1	5.1	5.1	0		820500	9	8.3	5.5	7.6	1.85203		820500	1.3	1.3	1.3	1.3	0
	821000	9	9	9	9	0		821000	5.4	5.4	7.2	6	1.03923		821000	10.9	9.4	7.3	9.2	1.80831		821000	3.8	3.8	3.8	3.8	5.43896e-16
	821500	3	3	3	3	0		821500	2.8	2.8	3	2.86667	0.11547		821500	19	17.1	11.4	15.8333	3.95517		821500	10	11.7	10	10.5667	0.981495
	822000	6	6	6	6	0		822000	4.9	4.9	4.9	4.9	0		822000	11.5	8.9	8.4	9.6	1.66433		822000	1.9	5.1	4.1	3.7	1.63707
	822500	5.8	5.8	8.3	6.63333	1.44338		822500	10.2	10.2	11.4	10.6	0.69282		822500	8.6	6.9	6.9	7.46667	0.981495		822500	0.6	4.3	4.3	3.06667	2.1362
	823000	1.2	1.2	2.5	1.63333	0.750555		823000	2	3.1	3	2.7	0.608276		823000	11.2	8.9	7.9	9.33333	1.69214		823000	0.6	2.3	2.3	1.73333	0.981495
	823500	6.2	6.2	9.4	7.26667	1.84752		823500	2	4.2	4.2	3.46667	1.27017		823500	13.4	8.5	5.2	9.03333	4.12593		823500	0.9	3.7	2.7	2.43333	1.41892
	824000	8.9	8.9	8.9	8.9	0		824000	7.1	7.1	10.1	8.1	1.73205		824000	6.3	4.7	3	4.66667	1.65025		824000	0.6	1.5	1.3	1.13333	0.472582
	824500	2.1	2.1	2.1	2.1	0		824500	1.9	2.8	6.1	3.6	2.21133		824500	15.7	14.4	7.8	12.6333	4.23596		824500	0.6	0.9	0.9	0.8	0.173205
	825000	2	2	2	2	0		825000	2	2	3.9	2.63333	1.09697		825000	6.6	6	6	6.2	0.34641		825000	0.6	2	2	1.53333	0.80829
	825500	5.1	5.1	5.1	5.1	0		825500	6.1	6.1	6.1	6.1	1.08779e-15		825500	13	8.1	6.5	9.2	3.38674		825500	1.8	6.2	5.4	4.46667	2.34379
	826000	4.6	4.6	4.6	4.6	0		826000	2.9	2.9	5.2	3.66667	1.32791		826000	14.6	10.9	9.1	11.5333	2.80416		826000	1.1	1.7	1.7	1.5	0.34641
	826500	3.6	3.6	3.6	3.6	0		826500	0.9	0.9	3.9	1.9	1.73205		826500	22.4	14.9	11.2	16.1667	5.70643		826500	4.9	9.2	9.2	7.76667	2.48261
	827000	4.7	4.7	4.7	4.7	0		827000	1.2	1.2	2.5	1.63333	0.750555		827000	9	9	5.3	7.76667	2.1362		827000	6.7	8.2	6.8	7.23333	0.83865
	827500	3.1	3.1	3.1	3.1	0		827500	3.4	3.4	3.4	3.4	0		827500	13.4	7.1	4.5	8.33333	4.57639		827500	3	8.9	6.1	6	2.95127
	828000	5.2	5.2	5.2	5.2	0		828000	9.7	9.7	13.5	10.9667	2.19393		828000	12	7.8	4.7	8.16667	3.66379		828000	2	5.7	4.5	4.06667	1.88768
	828500	4.4	5.2	5.2	4.93333	0.46188		828500	7.2	8.7	7.2	7.7	0.866025		828500	16.2	11.6	8.7	12.1667	3.78197		828500	1.8	8.2	8.2	6.06667	3.69504
	829000	0.7	0.9	0.9	0.833333	0.11547		829000	2.5	2.5	4.4	3.13333	1.09697		829000	9.4	9.4	5.3	8.03333	2.36714		829000	3.2	5.5	5.5	4.73333	1.32791
	829500	0.7	1.5	1.5	1.23333	0.46188		829500	0.9	0.9	1.9	1.23333	0.57735		829500	8.7	8.7	5.5	7.63333	1.84752		829500	2.6	2.1	2.1	2.26667	0.288675
	830000	1	2.4	3.6	2.33333	1.30128		830000	0.9	0.9	1.4	1.06667	0.288675		830000	12	10.3	3.4	8.56667	4.55448		830000	5.7	4.8	4.8	5.1	0.519615
	830500	2.1	3	3	2.7	0.519615		830500	1.3	1.3	3.3	1.96667	1.1547		830500	19	19	6.8	14.9333	7.04367		830500	1.9	2.8	2.8	2.5	0.519615
	831000	0.8	1.7	2.4	1.63333	0.802081		831000	7.7	7.7	13	9.46667	3.05996		831000	19.3	19.3	10.1	16.2333	5.31162		831000	1.5	9.7	8.1	6.43333	4.34665
	831500	0.8	1.7	3.4	1.96667	1.32035		831500	3	3	5.8	3.93333	1.61658		831500	9.7	8.1	5.8	7.86667	1.96044		831500	0.4	2.2	2.2	1.6	1.03923
	832000	1.6	2.4	3.9	2.63333	1.16762		832000	1.2	1.2	2.5	1.63333	0.750555		832000	11.1	11.1	7.9	10.0333	1.84752		832000	0.4	0.8	0.8	0.666667	0.23094
	832500	2.4	2.4	3.5	2.76667	0.635085		832500	3	3	6.3	4.1	1.90526		832500	7.8	7.8	3.3	6.3	2.59808		832500	0.4	1	1	0.8	0.34641
	833000	4	4	5.3	4.43333	0.750555		833000	1	1	3.6	1.86667	1.50111		833000	12.7	12.3	1.5	8.83333	6.354		833000	0.4	1.9	1.8	1.36667	0.83865
	833500	14	14	14	14	0		833500	1.3	2.2	4.7	2.73333	1.76163		833500	19.9	14.5	5.3	13.2333	7.38196		833500	1.4	3.2	1.3	1.96667	1.06927
	834000	4.1	5.5	6.3	5.3	1.11355		834000	0.8	1.6	2.5	1.63333	0.85049		834000	6.5	4.9	4.5	5.3	1.0583		834000	0.9	0.9	0.9	0.9	0
	834500	2.6	2.6	4.3	3.16667	0.981495		834500	0.8	1.1	2	1.3	0.6245		834500	17.3	14.6	9.3	13.7333	4.06981		834500	0.9	0.9	0.9	0.9	0
	835000	1.5	1.5	1.5	1.5	0		835000	1.2	1.4	2.2	1.6	0.52915		835000	5.7	5.7	5.2	5.53333	0.288675		835000	3.4	4.3	3.4	3.7	0.519615
	835500	2.5	2.5	2.3	2.43333	0.11547		835500	2.1	2.1	2.1	2.1	0		835500	12.9	11.2	8	10.7	2.48797		835500	1.5	1.5	1.5	1.5	0
	836000	2.8	2.8	2	2.53333	0.46188		836000	2.2	2.2	4.6	3	1.38564		836000	2.9	2.9	2.9	2.9	0		836000	1.6	2.5	2.5	2.2	0.519615
	836500	4.8	4.8	7.3	5.63333	1.44338		836500	3.4	3.4	5.1	3.96667	0.981495		836500	8.2	5.1	4.1	5.8	2.13776		836500	5	7	6.2	6.06667	1.00664
	837000	9.1	7.8	9.8	8.9	1.01489		837000	8.7	8.7	8.7	8.7	0		837000	16.4	15	12.3	14.5667	2.08407		837000	4.9	7.2	5.4	5.83333	1.20968
	837500	4.8	4.8	6	5.2	0.69282		837500	9.9	9.9	9.9	9.9	0		837500	14.4	12.6	9	12	2.74955		837500	0.7	1.4	1.4	1.16667	0.404145
	838000	5.9	5.9	5.9	5.9	1.08779e-15		838000	3.5	3.5	3.5	3.5	0		838000	11.6	11.6	6.5	9.9	2.94449		838000	0.3	0.7	0.7	0.566667	0.23094
	838500	2	2	2	2	0		838500	2.9	2.9	2.9	2.9	0		838500	5.8	5.8	1.9	4.5	2.25167		838500	0.3	1.3	1.3	0.966667	0.57735
	839000	7.8	7.8	9.8	8.46667	1.1547		839000	0.7	0.7	0.7	0.7	1.35974e-16		839000	7.8	5.2	3.7	5.56667	2.07445		839000	0.3	2.1	2.1	1.5	1.03923
	839500	5.4	5.4	7.1	5.96667	0.981495		839500	0.7	0.7	0.7	0.7	1.35974e-16		839500	17	15.7	8.5	13.7333	4.57857		839500	0.3	1.6	1.6	1.16667	0.750555
	840000	4	4	4	4	0		840000	1.5	1.5	2.6	1.86667	0.635085		840000	10.8	9	8.3	9.36667	1.2897		840000	0.3	2.8	2.8	1.96667	1.44338
	840500	1.6	1.6	1.6	1.6	2.71948e-16		840500	0.5	0.5	2.3	1.1	1.03923		840500	11	11	6.3	9.43333	2.71355		840500	0.4	2.6	2.6	1.86667	1.27017
	841000	1.9	1.9	1.9	1.9	2.71948e-16		841000	0.5	0.5	1.2	0.733333	0.404145		841000	14.2	11.4	5.4	10.3333	4.49592		841000	0.6	2.3	2.3	1.73333	0.981495
	841500	2.1	2.1	2.1	2.1	0		841500	0.5	0.5	2.7	1.23333	1.27017		841500	16	13	5.6	11.5333	5.35288		841500	0.6	3.5	3.5	2.53333	1.67432
	842000	2.4	2.4	1.7	2.16667	0.404145		842000	0.9	0.9	6.7	2.83333	3.34863		842000	11.7	11.7	8.8	10.7333	1.67432		842000	0.6	1.6	1.6	1.26667	0.57735
	842500	2	2	1	1.66667	0.57735		842500	7.6	8.9	9.3	8.6	0.888819		842500	8.4	8.4	5.1	7.3	1.90526		842500	0.7	1.2	1.2	1.03333	0.288675
	843000	9.7	9.7	6	8.46667	2.1362		843000	2.5	3.9	2.5	2.96667	0.80829		843000	8.3	7.1	3.1	6.16667	2.72274		843000	0.7	1.7	1.7	1.36667	0.57735
	843500	5.8	5.8	6.6	6.06667	0.46188		843500	7.5	10	8.6	8.7	1.253		843500	12	9.9	6	9.3	3.04467		843500	1.7	4.2	3.1	3	1.253
	844000	1.4	1.4	1.4	1.4	2.71948e-16		844000	4	4	5.5	4.5	0.866025		844000	15.6	13	7.8	12.1333	3.97157		844000	0.8	2.8	2.8	2.13333	1.1547
	844500	1.4	1.4	1.4	1.4	2.71948e-16		844500	5.5	5.5	6.9	5.96667	0.80829		844500	11.4	9.8	8	9.73333	1.70098		844500	0.4	0.9	0.9	0.733333	0.288675
	845000	3.9	3.9	3.9	3.9	0		845000	6.1	6.1	7.6	6.6	0.866025		845000	22.2	13.6	8.5	14.7667	6.92411		845000	0.4	0.6	0.6	0.533333	0.11547
	845500	3.6	3.6	3.6	3.6	0		845500	8.8	8.8	10.6	9.4	1.03923		845500	13.4	9.8	8.2	10.4667	2.66333		845500	0.4	0.6	0.6	0.533333	0.11547
	846000	6.1	6.1	7.3	6.5	0.69282		846000	4.3	4.3	6.5	5.03333	1.27017		846000	15.8	15.8	7.2	12.9333	4.96521		846000	0.7	0.9	0.8	0.8	0.1
	846500	5.2	5.2	5.2	5.2	0		846500	2.1	2.7	2.5	2.43333	0.305505		846500	7.7	5.8	3.2	5.56667	2.25906		846500	1.7	3.3	1.7	2.23333	0.92376
	847000	6.5	6.5	6.5	6.5	0		847000	1.4	2	1.4	1.6	0.34641		847000	12.1	12.1	10.8	11.6667	0.750555		847000	1.2	2.5	1.7	1.8	0.655744
	847500	1.8	1.8	1.8	1.8	0		847500	0.9	0.9	0.9	0.9	0		847500	9.4	7.8	5	7.4	2.22711		847500	1.4	2.7	2.7	2.26667	0.750555
	848000	4.8	4.8	4.8	4.8	0		848000	1.2	1.3	1.2	1.23333	0.057735		848000	12	7.5	4.4	7.96667	3.82143		848000	1	1.1	1.1	1.06667	0.057735
	848500	10.9	10.9	12.8	11.5333	1.09697		848500	2	4	4	3.33333	1.1547		848500	7.6	3.8	3.8	5.06667	2.19393		848500	0.7	2.7	2.7	2.03333	1.1547
	849000	3.4	3.4	3.4	3.4	0		849000	2.9	3.9	3.7	3.5	0.52915		849000	12.8	8.8	6.6	9.4	3.14325		849000	0.6	2.1	2.1	1.6	0.866025
	849500	1.5	1.5	1.5	1.5	0		849500	3.2	3.2	4.8	3.73333	0.92376		849500	15.3	9.6	7.7	10.8667	3.95517		849500	0.6	0.9	0.9	0.8	0.173205
	850000	1.4	1.4	1.4	1.4	2.71948e-16		850000	6.3	6.3	6.8	6.46667	0.288675		850000	10.5	9.2	6.6	8.76667	1.98578		850000	0.6	1.4	1.4	1.13333	0.46188
	850500	2.9	2.9	2.9	2.9	0		850500	8.9	8.9	11.9	9.9	1.73205		850500	6.8	6.8	4.1	5.9	1.55885		850500	2.8	8.8	7.3	6.3	3.1225
	851000	1.4	1.4	1.4	1.4	2.71948e-16		851000	5.3	5.3	5.3	5.3	0		851000	9.8	7	5	7.26667	2.41109		851000	7.3	8.2	6.9	7.46667	0.665833
	851500	0.6	0.6	0.6	0.6	0		851500	4.8	4.8	4.8	4.8	0		851500	10.1	7.9	6.3	8.1	1.90788		851500	5	8.2	5.2	6.13333	1.79258
	852000	0.6	0.6	0.6	0.6	0		852000	7.4	7.4	8.8	7.86667	0.80829		852000	14.4	12.8	9.6	12.2667	2.44404		852000	0.8	1.3	1.3	1.13333	0.288675
	852500	0.6	0.6	0.6	0.6	0		852500	11	12.8	14.6	12.8	1.8		852500	13.4	12.7	6	10.7	4.08534		852500	0.8	2.2	2.2	1.73333	0.80829
	853000	4	4	4	4	0		853000	7.9	9.9	12	9.93333	2.0502		853000	13.2	13.2	4.8	10.4	4.84974		853000	1.5	5	5	3.83333	2.02073
	853500	3.8	3.8	3.8	3.8	5.43896e-16		853500	6.1	7.3	7.3	6.9	0.69282		853500	8.9	8.9	5.1	7.63333	2.19393		853500	0.9	2	2	1.63333	0.635085
	854000	1.8	1.8	1.8	1.8	0		854000	8.8	11.1	12.7	10.8667	1.96044		854000	9	9	7.2	8.4	1.03923		854000	0.9	2.1	1.2	1.4	0.6245
	854500	2.4	2.4	2.2	2.33333	0.11547		854500	2.4	3.8	4.5	3.56667	1.06927		854500	15.8	7.2	7.2	10.0667	4.96521		854500	1.7	3.8	1.3	2.26667	1.34288
	855000	5	5	3.4	4.46667	0.92376		855000	0.8	0.8	1.3	0.966667	0.288675		855000	6.8	4.6	3.2	4.86667	1.81475		855000	1.4	3.5	3.2	2.7	1.13578
	855500	6.6	6.6	6.6	6.6	1.08779e-15		855500	0.8	0.8	1.7	1.1	0.519615		855500	13	9.8	6.3	9.7	3.35112		855500	0.7	3	3	2.23333	1.32791
	856000	2.5	2.5	2.5	2.5	0		856000	6.1	6.7	12.2	8.33333	3.36204		856000	16.9	16.9	8.5	14.1	4.84974		856000	0.7	3.1	3.1	2.3	1.38564
	856500	8	8	8	8	0		856500	3.5	3.5	3.7	3.56667	0.11547		856500	10.4	10.4	4.5	8.43333	3.40637		856500	0.9	2.9	2.2	2	1.01489
	857000	2.5	3.1	3.1	2.9	0.34641		857000	1.2	1.2	1.3	1.23333	0.057735		857000	17.5	13.6	7.4	12.8333	5.09346		857000	0.6	1	0.9	0.833333	0.208167
	857500	0.8	0.9	0.9	0.866667	0.057735		857500	7.1	7.1	8.7	7.63333	0.92376		857500	14.9	8.5	5.6	9.66667	4.7585		857500	0.6	1.4	1.3	1.1	0.43589
	858000	0.8	0.9	0.9	0.866667	0.057735		858000	11.5	11.5	11.5	11.5	0		858000	11.9	8.5	3.4	7.93333	4.27824		858000	0.6	2.4	2.4	1.8	1.03923
	858500	1.7	1.7	2.2	1.86667	0.288675		858500	7.3	7.3	7.3	7.3	0		858500	15	13.7	9.9	12.8667	2.65016		858500	0.3	0.7	0.7	0.566667	0.23094
	859000	1.2	1.2	2.4	1.6	0.69282		859000	12.1	13.8	12.1	12.6667	0.981495		859000	17.7	15.7	11.8	15.0667	3.00056		859000	0.3	0.7	0.7	0.566667	0.23094
	859500	6.3	6.3	9.7	7.43333	1.96299		859500	5.2	6.4	5.8	5.8	0.6		859500	11.5	9.3	5.3	8.7	3.14325		859500	0.3	1.6	1.6	1.16667	0.750555
	860000	4.7	4.7	4.7	4.7	0		860000	1.3	1.3	2.7	1.76667	0.80829		860000	13.2	9.9	7.1	10.0667	3.05341		860000	0.3	2.9	2.9	2.03333	1.50111
	860500	1.9	1.9	1.9	1.9	2.71948e-16		860500	1.7	1.9	4.1	2.56667	1.33167		860500	17.1	13.7	7.9	12.9	4.65188		860500	0.3	1.7	1.7	1.23333	0.80829
	861000	2.7	2.7	4.1	3.16667	0.80829		861000	1.1	2.1	5.3	2.83333	2.19393		861000	9.3	5.1	3.5	5.96667	2.99555		861000	0.3	0.7	0.7	0.566667	0.23094
	861500	4.1	4.1	4.1	4.1	0		861500	3.5	6.3	9.7	6.5	3.10483		861500	6	4.3	4.3	4.86667	0.981495		861500	0.3	0.7	0.7	0.566667	0.23094
	862000	1.5	2.3	2.3	2.03333	0.46188		862000	2.4	2.4	2.4	2.4	0		862000	14.1	11.3	9.9	11.7667	2.13854		862000	0.7	2.4	2.4	1.83333	0.981495
	862500	0.9	1.3	1.3	1.16667	0.23094		862500	0.9	0.9	0.9	0.9	0		862500	10.6	10.6	9	10.0667	0.92376		862500	1.2	3	3	2.4	1.03923
	863000	1.3	1.8	1.8	1.63333	0.288675		863000	0.9	0.9	0.9	0.9	0		863000	15.4	15.4	8.1	12.9667	4.21466		863000	3	5	4.3	4.1	1.01489
	863500	4.4	4.4	5.1	4.63333	0.404145		863500	1	1	1	1	0		863500	12.5	10.8	7.2	10.1667	2.70617		863500	1	1.4	1.3	1.23333	0.208167
	864000	9.8	9.8	11.4	10.3333	0.92376		864000	2.3	2.3	2.3	2.3	0		864000	6.2	6.2	3.6	5.33333	1.50111		864000	4.4	5.2	4.1	4.56667	0.568624
	864500	8.8	10.6	10.6	10	1.03923		864500	3.3	4.3	4.3	3.96667	0.57735		864500	12.7	11.3	3.7	9.23333	4.84286		864500	3	3.9	2	2.96667	0.950438
	865000	3.5	3.5	3.5	3.5	0		865000	2.4	4.1	4	3.5	0.953939		865000	6	6	4.6	5.53333	0.80829		865000	1.4	3	2.3	2.23333	0.802081
	865500	6.1	6.1	6.1	6.1	1.08779e-15		865500	0.9	1.7	1.3	1.3	0.4		865500	29.2	22.4	9.2	20.2667	10.1692		865500	1.9	5.7	3.4	3.66667	1.91398
	866000	7	7	8.9	7.63333	1.09697		866000	0.9	1.3	2.6	1.6	0.888819		866000	10.6	9.1	3	7.56667	4.02534		866000	3.5	7	6	5.5	1.80278
	866500	5	5	5.9	5.3	0.519615		866500	4.5	6.2	10.8	7.16667	3.25935		866500	10.4	10.4	8.7	9.83333	0.981495		866500	1.8	3.6	3.6	3	1.03923
	867000	3.1	3.1	3.1	3.1	0		867000	11.6	11.6	11.6	11.6	0		867000	15.1	10.1	5.3	10.1667	4.90034		867000	2.7	3.6	3.6	3.3	0.519615
	867500	2.3	2.3	3.6	2.73333	0.750555		867500	1.8	1.8	3.4	2.33333	0.92376		867500	5.4	5	3.8	4.73333	0.832666		867500	1.3	3.5	3.5	2.76667	1.27017
	868000	2.1	2.1	3.1	2.43333	0.57735		868000	1.3	1.3	3	1.86667	0.981495		868000	9.6	8.5	4.3	7.46667	2.79702		868000	0.8	1.9	1.9	1.53333	0.635085
	868500	10.2	10.2	10.5	10.3	0.173205		868500	1.4	1.4	4.7	2.5	1.90526		868500	9.3	9.3	5.5	8.03333	2.19393		868500	1.2	4.8	3.8	3.26667	1.85831
	869000	2.3	2.3	3.1	2.56667	0.46188		869000	5.8	5.8	13.3	8.3	4.33013		869000	10.2	9.5	4.8	8.16667	2.93655		869000	3.5	5.8	5.1	4.8	1.17898
	869500	1	1	1	1	0		869500	8.8	10.5	12	10.4333	1.60104		869500	13.1	9.9	7.7	10.2333	2.71539		869500	1.7	2.8	2.8	2.43333	0.635085
	870000	2.9	2.9	3.5	3.1	0.34641		870000	11.1	12.5	15.5	13.0333	2.24796		870000	14.2	12.6	7.9	11.5667	3.27465		870000	1.4	2.8	2.8	2.33333	0.80829
	870500	9.3	9.3	8.1	8.9	0.69282		870500	1.7	1.7	2.8	2.06667	0.635085		870500	3.6	3.6	2.9	3.36667	0.404145		870500	1.5	6.4	6.4	4.76667	2.82902
	871000	3.7	3.7	2.5	3.3	0.69282		871000	0.7	0.7	0.8	0.733333	0.057735		871000	11.7	7.8	5.6	8.36667	3.08923		871000	0.8	3.2	3.2	2.4	1.38564
	871500	2.1	2.1	2.1	2.1	0		871500	0.7	0.7	2	1.13333	0.750555		871500	10.9	9.1	6.6	8.86667	2.15948		871500	1.3	2.4	2.4	2.03333	0.635085
	872000	1.2	1.2	1.2	1.2	0		872000	1.1	1.1	3.2	1.8	1.21244		872000	5.4	5.4	5.4	5.4	1.08779e-15		872000	3.8	3.8	2.4	3.33333	0.80829
	872500	3.4	3.4	3.4	3.4	0		872500	2.4	2.4	2.4	2.4	0		872500	2.2	2.2	2.2	2.2	0		872500	2.3	3.6	2.2	2.7	0.781025
	873000	6.1	6.1	6.1	6.1	1.08779e-15		873000	6.1	6.1	6.1	6.1	1.08779e-15		873000	8.1	8.1	8.1	8.1	0		873000	0.6	0.7	0.7	0.666667	0.057735
	873500	1.1	1.1	1.1	1.1	0		873500	1.9	1.9	3.2	2.33333	0.750555		873500	8.7	8.7	5.8	7.73333	1.67432		873500	0.6	0.7	0.7	0.666667	0.057735
	874000	3.7	3.7	3.1	3.5	0.34641		874000	0.8	0.8	0.9	0.833333	0.057735		874000	14.9	9.3	5.3	9.83333	4.82217		874000	3.6	4.2	3.6	3.8	0.34641
	874500	1.3	1.3	1.3	1.3	0		874500	1.5	1.5	1.6	1.53333	0.057735		874500	14.8	14.8	10.8	13.4667	2.3094		874500	2.6	6.3	6.3	5.06667	2.1362
	875000	3.5	3.5	4	3.66667	0.288675		875000	11.2	11.2	11.2	11.2	2.17558e-15		875000	7.9	7.6	6.7	7.4	0.6245		875000	1.6	4.6	3.1	3.1	1.5
	875500	1.1	1.1	1.1	1.1	0		875500	2.2	2.2	3.2	2.53333	0.57735		875500	21	15.4	8.5	14.9667	6.26126		875500	3.6	6.4	4.4	4.8	1.44222
	876000	1.8	1.8	1.8	1.8	0		876000	2.8	2.8	5	3.53333	1.27017		876000	20	16.7	13.3	16.6667	3.35012		876000	0.8	2	2	1.6	0.69282
	876500	3.1	3.1	3.1	3.1	0		876500	1.3	2	3.5	2.26667	1.12398		876500	13.8	13.8	3.4	10.3333	6.00444		876500	0.8	2.9	2.9	2.2	1.21244
	877000	10.1	10.1	10.1	10.1	0		877000	0.7	0.7	1.8	1.06667	0.635085		877000	13	13	5	10.3333	4.6188		877000	2.9	6.2	6.2	5.1	1.90526
	877500	5.9	5.9	7.4	6.4	0.866025		877500	1	1.1	2.1	1.4	0.608276		877500	11.3	10.3	6	9.2	2.81603		877500	1	1.3	1.3	1.2	0.173205
	878000	8.5	8.5	9.4	8.8	0.519615		878000	1.7	3.4	3.4	2.83333	0.981495		878000	8.3	6.9	3.8	6.33333	2.3029		878000	1.3	2	2	1.76667	0.404145
	878500	8.4	8.4	8.4	8.4	0		878500	5.6	10.9	11	9.16667	3.08923		878500	9.2	8.2	5.9	7.76667	1.69214		878500	2.2	3.3	3.3	2.93333	0.635085
	879000	8.3	8.3	8.4	8.33333	0.057735		879000	5.2	6.2	5.2	5.53333	0.57735		879000	6.5	5.4	4.2	5.36667	1.15036		879000	3.7	7	7	5.9	1.90526
	879500	1.2	1.2	1.2	1.2	0		879500	2.1	2.1	2.1	2.1	0		879500	6.6	5	2.3	4.63333	2.17332		879500	1.3	5.4	5.4	4.03333	2.36714
	880000	5.5	5.5	6.4	5.8	0.519615		880000	7	7	7	7	0		880000	11.7	9.5	6.3	9.16667	2.71539		880000	1.5	5.1	5.1	3.9	2.07846
	880500	3	3	3	3	0		880500	3.9	3.9	3.9	3.9	0		880500	10.3	8.2	4.8	7.76667	2.77549		880500	6.7	12.7	12.7	10.7	3.4641
	881000	0.9	0.9	0.9	0.9	0		881000	2.2	3	2.2	2.46667	0.46188		881000	19.3	13.5	13.5	15.4333	3.34863		881000	3	3.3	3.3	3.2	0.173205
	881500	1.6	1.6	2.1	1.76667	0.288675		881500	3.3	3.3	4.8	3.8	0.866025		881500	12.3	9.4	6.7	9.46667	2.8006		881500	4.2	4.2	4.2	4.2	0
	882000	1.7	1.7	1.7	1.7	0		882000	2.1	2.1	3.5	2.56667	0.80829		882000	10	8.8	5.2	8	2.498		882000	12.6	14.4	12.6	13.2	1.03923
	882500	2.7	3.6	3.6	3.3	0.519615		882500	2.5	2.5	5	3.33333	1.44338		882500	7.5	7.5	3.4	6.13333	2.36714		882500	12.6	22.9	19	18.1667	5.20032
	883000	4.3	5.8	5.8	5.3	0.866025		883000	10.9	10.9	10.9	10.9	0		883000	16.8	11.8	9.4	12.6667	3.77536		883000	3.2	7.1	7.1	5.8	2.25167
	883500	3.3	3.3	3.3	3.3	5.43896e-16		883500	12.5	12.5	14.3	13.1	1.03923		883500	14.9	9.7	8.3	10.9667	3.47755		883500	8.2	8.2	8.2	8.2	0
	884000	2.6	2.6	3.9	3.03333	0.750555		884000	2.6	3.5	3	3.03333	0.450925		884000	11.9	11.9	7.4	10.4	2.59808		884000	7.6	7.6	7.6	7.6	1.08779e-15
	884500	4.3	4.3	4.5	4.36667	0.11547		884500	2.1	2.4	2.1	2.2	0.173205		884500	10.1	10.1	5.6	8.6	2.59808		884500	7	7	5.6	6.53333	0.80829
	885000	0.9	0.9	0.9	0.9	0		885000	7	7	7	7	0		885000	18.3	11.6	8.1	12.6667	5.18298		885000	4	5.4	5.3	4.9	0.781025
	885500	0.9	0.9	0.9	0.9	0		885500	6.5	6.5	6.5	6.5	0		885500	6.2	4.6	2.5	4.43333	1.85562		885500	1	2	1.3	1.43333	0.51316
	886000	2.4	2.4	2.4	2.4	0		886000	4	6	5	5	1		886000	10	6.2	3.7	6.63333	3.17228		886000	0.4	0.9	0.9	0.733333	0.288675
	886500	6	6	6	6	0		886500	2.8	3.1	3.1	3	0.173205		886500	17.9	13.1	9.2	13.4	4.35775		886500	0.4	1	1	0.8	0.34641
	887000	2.2	2.2	3.3	2.56667	0.635085		887000	2.9	3.8	2.9	3.2	0.519615		887000	9.8	8.4	8.4	8.86667	0.80829		887000	0.4	1.2	1.2	0.933333	0.46188
	887500	2.6	5.1	8.4	5.36667	2.90918		887500	1.2	1.2	1.2	1.2	0		887500	8.2	8.2	7.1	7.83333	0.635085		887500	0.4	1.4	1.4	1.06667	0.57735
	888000	6.6	11.4	19	12.3333	6.25247		888000	2.8	2.8	3.5	3.03333	0.404145		888000	7.2	7.2	7.2	7.2	0		888000	0.4	1.8	1.8	1.33333	0.80829
	888500	9	9.2	10.3	9.5	0.7		888500	4.9	4.9	6.1	5.3	0.69282		888500	20.8	19.3	7.4	15.8333	7.34189		888500	0.5	1.7	1.7	1.3	0.69282
	889000	4.6	6.1	6.1	5.6	0.866025		889000	6.6	9.9	8.3	8.26667	1.65025		889000	12	12	6.8	10.2667	3.00222		889000	0.5	1.8	1.8	1.36667	0.750555
	889500	6.8	6.8	10.9	8.16667	2.36714		889500	2.1	2.1	2.1	2.1	0		889500	14.5	12.7	3.6	10.2667	5.84323		889500	0.5	2.4	2.4	1.76667	1.09697
	890000	5.6	5.6	7	6.06667	0.80829		890000	1.6	2.6	2.5	2.23333	0.550757		890000	23	23	12.5	19.5	6.06218		890000	0.8	2.5	2.4	1.9	0.953939
	890500	6.5	6.5	8.3	7.1	1.03923		890500	1	1.1	2.1	1.4	0.608276		890500	13.5	12	4.7	10.0667	4.70779		890500	3.2	3.2	2.5	2.96667	0.404145
	891000	1.5	1.5	1.7	1.56667	0.11547		891000	1.3	1.3	1.6	1.4	0.173205		891000	6.6	6.6	1.7	4.96667	2.82902		891000	0.9	0.9	0.9	0.9	0
	891500	4.5	4.5	4.8	4.6	0.173205		891500	3.2	3.2	3.2	3.2	5.43896e-16		891500	14.6	14.6	7.1	12.1	4.33013		891500	0.9	1.6	1.6	1.36667	0.404145
	892000	7.2	7.2	7.2	7.2	0		892000	10.8	10.8	12.3	11.3	0.866025		892000	12.5	10.7	7.1	10.1	2.74955		892000	0.9	1.3	1.3	1.16667	0.23094
	892500	2.8	2.8	2.9	2.83333	0.057735		892500	6.8	6.8	8.5	7.36667	0.981495		892500	10.4	10.4	9.1	9.96667	0.750555		892500	1.5	3	3	2.5	0.866025
	893000	0.9	0.9	1	0.933333	0.057735		893000	8.9	8.9	8.9	8.9	0		893000	14.3	11.9	5.1	10.4333	4.77214		893000	3.7	9.1	6.5	6.43333	2.70062
	893500	3.7	3.7	4.4	3.93333	0.404145		893500	2.8	3.7	5.4	3.96667	1.32035		893500	23	17.3	7.4	15.9	7.89367		893500	0.7	2.2	2.1	1.66667	0.83865
	894000	2.7	2.7	2.7	2.7	5.43896e-16		894000	8.3	10.6	17.5	12.1333	4.78783		894000	22.9	14.3	7.8	15	7.5743		894000	0.7	1.2	1.2	1.03333	0.288675
	894500	3.2	3.2	3.2	3.2	5.43896e-16		894500	12.3	12.3	13.5	12.7	0.69282		894500	6.3	5.6	2.8	4.9	1.85203		894500	1.5	2.4	2.4	2.1	0.519615
	895000	1	1	1	1	0		895000	3	4.5	3	3.5	0.866025		895000	17.3	11.5	5.8	11.5333	5.75007		895000	7.5	7.8	6.8	7.36667	0.51316
	895500	0.9	0.9	1	0.933333	0.057735		895500	4.4	4.5	9.5	6.13333	2.91605		895500	7.8	2.9	2.9	4.53333	2.82902		895500	3.5	3.5	3.5	3.5	0
	896000	0.8	0.8	0.9	0.833333	0.057735		896000	1.4	1.4	2.8	1.86667	0.80829		896000	14.3	5.6	4.5	8.13333	5.36874		896000	4	4.6	3.4	4	0.6
	896500	0.8	0.8	1.7	1.1	0.519615		896500	2.5	2.5	2.7	2.56667	0.11547		896500	16.3	8	4.1	9.46667	6.23084		896500	0.8	0.8	0.8	0.8	1.35974e-16
	897000	1.3	1.3	1.9	1.5	0.34641		897000	2.2	2.2	2.2	2.2	0		897000	13.8	9.4	7.2	10.1333	3.36056		897000	1.2	1.7	0.8	1.23333	0.450925
	897500	0.9	0.9	1	0.933333	0.057735		897500	3.2	3.2	3.2	3.2	5.43896e-16		897500	9.8	8.4	5.1	7.76667	2.41316		897500	1.9	5.7	1.8	3.13333	2.22336
	898000	1.7	1.7	2.3	1.9	0.34641		898000	2.3	2.3	3.4	2.66667	0.635085		898000	21.1	17.2	7.7	15.3333	6.89227		898000	7.5	13.9	9.3	10.2333	3.30051
	898500	2	2	2	2	0		898500	2.9	2.9	6.3	4.03333	1.96299		898500	14.2	10.6	7.7	10.8333	3.25628		898500	1.6	6.7	6.7	5	2.94449
	899000	3.6	3.6	4.5	3.9	0.519615		899000	1.4	1.4	4.1	2.3	1.55885		899000	11.7	9.8	6.1	9.2	2.84781		899000	1.1	3.2	3.1	2.46667	1.18462
	899500	1.2	1.2	2.4	1.6	0.69282		899500	2.8	3.4	5.4	3.86667	1.36137		899500	12.8	9.2	5.2	9.06667	3.80175		899500	3.6	9.6	7.8	7	3.07896
	900000	3.5	3.5	5	4	0.866025		900000	10.3	10.3	12	10.8667	0.981495		900000	14.7	11.5	3.3	9.83333	5.87991		900000	7.8	10.9	8.2	8.96667	1.68622
	900500	2.5	2.5	2.5	2.5	0		900500	5.6	5.6	7.9	6.36667	1.32791		900500	13.4	13.4	6.3	11.0333	4.09919		900500	4	4.8	4.8	4.53333	0.46188
	901000	3.3	3.3	3.3	3.3	5.43896e-16		901000	1.4	1.4	3.2	2	1.03923		901000	10.3	6.9	4	7.06667	3.15331		901000	0.6	4.2	4.2	3	2.07846
	901500	3	3	3	3	0		901500	1.2	1.2	2.8	1.73333	0.92376		901500	11.3	8.5	5.7	8.5	2.8		901500	0.4	2.3	2.3	1.66667	1.09697
	902000	5.1	5.1	6.1	5.43333	0.57735		902000	1.3	1.3	5.9	2.83333	2.65581		902000	8.8	7.1	7.1	7.66667	0.981495		902000	0.4	1.4	1.4	1.06667	0.57735
	902500	9	9	10.8	9.6	1.03923		902500	6.2	6.2	12.4	8.26667	3.57957		902500	11.6	10.9	7.8	10.1	2.02237		902500	0.4	0.6	0.6	0.533333	0.11547
	903000	9.9	9.9	11.5	10.4333	0.92376		903000	5.6	9.3	7.5	7.46667	1.85023		903000	13.5	13.5	8.1	11.7	3.11769		903000	0.4	0.6	0.6	0.533333	0.11547
	903500	4.8	4.8	4.8	4.8	0		903500	4.5	5	6.2	5.23333	0.873689		903500	4.9	4.9	4.9	4.9	0		903500	0.4	0.6	0.6	0.533333	0.11547
	904000	13.7	13.7	13.7	13.7	2.17558e-15		904000	4.7	4.7	4.7	4.7	0		904000	5.5	5.2	3.9	4.86667	0.85049		904000	1.5	3.1	3.1	2.56667	0.92376
	904500	3	3	3.3	3.1	0.173205		904500	6.7	6.7	6.7	6.7	0		904500	17.1	11.4	7.6	12.0333	4.78156		904500	5	6.7	5.6	5.76667	0.862168
	905000	1.2	1.2	1.4	1.26667	0.11547		905000	13.5	13.5	13.5	13.5	0		905000	12.5	12.5	10.4	11.8	1.21244		905000	6.5	6.8	6.8	6.7	0.173205
	905500	1.9	1.9	2.3	2.03333	0.23094		905500	3.5	5.3	3.5	4.1	1.03923		905500	9.5	8.1	3.7	7.1	3.02655		905500	5.3	8	6.7	6.66667	1.35031
	906000	2.2	2.2	2.2	2.2	0		906000	4.1	5.2	4.1	4.46667	0.635085		906000	11.4	8	5.1	8.16667	3.15331		906000	16.9	22.5	17.5	18.9667	3.07463
	906500	2.9	2.9	3.4	3.06667	0.288675		906500	2.5	2.5	2.5	2.5	0		906500	10.3	10.3	6	8.86667	2.48261		906500	4.4	8.1	7.2	6.56667	1.92959
	907000	2.2	2.2	2.2	2.2	0		907000	5.4	5.4	5.4	5.4	1.08779e-15		907000	19.3	14.5	5.6	13.1333	6.9515		907000	1.1	1.6	1.6	1.43333	0.288675
	907500	2.2	2.2	3.3	2.56667	0.635085		907500	4.7	5.6	4.7	5	0.519615		907500	12.5	12.5	7.3	10.7667	3.00222		907500	1.7	2.4	2.4	2.16667	0.404145
	908000	1.2	1.2	1.8	1.4	0.34641		908000	1.4	1.4	1.4	1.4	2.71948e-16		908000	15.9	12.3	6.7	11.6333	4.63609		908000	1.3	1.3	1.3	1.3	0
	908500	1.8	1.8	1.4	1.66667	0.23094		908500	3.1	3.1	3.1	3.1	0		908500	14.8	11.1	4.9	10.2667	5.00233		908500	0.8	2.3	2.3	1.8	0.866025
	909000	5.6	5.6	4.5	5.23333	0.635085		909000	2.2	2.2	2.2	2.2	0		909000	18.2	15	9.3	14.1667	4.50814		909000	0.6	0.7	0.7	0.666667	0.057735
	909500	1.5	1.5	2.9	1.96667	0.80829		909500	2.3	2.3	3.4	2.66667	0.635085		909500	10.4	9	6	8.46667	2.24796		909500	0.6	0.7	0.7	0.666667	0.057735
	910000	1.3	1.3	3.6	2.06667	1.32791		910000	4.6	4.9	5.5	5	0.458258		910000	13.2	12.6	7.5	11.1	3.13209		910000	0.9	1.8	1.8	1.5	0.519615
	910500	2.1	2.1	2.6	2.26667	0.288675		910500	3	4.4	3	3.46667	0.80829		910500	16.3	14.7	11.2	14.0667	2.60832		910500	4.1	5.1	3.4	4.2	0.8544
	911000	3	3	1.3	2.43333	0.981495		911000	7	7	7.4	7.13333	0.23094		911000	17.8	12.6	5.6	12	6.12209		911000	1.4	1.4	1.4	1.4	2.71948e-16
	911500	2.8	2.8	1.7	2.43333	0.635085		911500	7.1	7.1	8.3	7.5	0.69282		911500	8.7	8.7	5.2	7.53333	2.02073		911500	1.2	2.4	2.4	2	0.69282
	912000	2.7	2.7	1.8	2.4	0.519615		912000	2.2	2.8	3.6	2.86667	0.702377		912000	9.8	7.9	6.2	7.96667	1.80093		912000	1.1	3	3	2.36667	1.09697
	912500	3.8	3.8	3.2	3.6	0.34641		912500	1.1	1.5	2.2	1.6	0.556776		912500	10.9	9.7	3.2	7.93333	4.14287		912500	1.1	2.6	2.6	2.1	0.866025
	913000	4.9	4.9	8.6	6.13333	2.1362		913000	3.3	4.3	6.4	4.66667	1.58219		913000	9.9	8.2	4.3	7.46667	2.87112		913000	1.5	3.6	2.4	2.5	1.05357
	913500	5.2	5.2	5.2	5.2	0		913500	7.9	9.2	8.8	8.63333	0.665833		913500	21.1	13.4	9.7	14.7333	5.81578		913500	1.8	3.7	2.5	2.66667	0.960902
	914000	5.8	6.8	8.2	6.93333	1.20554		914000	8.7	8.7	10.4	9.26667	0.981495		914000	10.7	8.9	5.3	8.3	2.74955		914000	1.5	1.5	1.4	1.46667	0.057735
	914500	2.1	2.1	3.9	2.7	1.03923		914500	1.7	1.7	1.8	1.73333	0.057735		914500	9	8.2	4.9	7.36667	2.17332		914500	2.5	4.9	3.9	3.76667	1.20554
	915000	4.6	4.6	3.5	4.23333	0.635085		915000	4	4	4	4	0		915000	10.4	8.1	3.5	7.33333	3.51331		915000	0.4	1.1	1.1	0.866667	0.404145
	915500	2.2	2.2	1.7	2.03333	0.288675		915500	9.5	9.5	9.5	9.5	0		915500	9.7	7.8	5.1	7.53333	2.31157		915500	0.4	1.7	1.7	1.26667	0.750555
	916000	2.5	2.5	1.7	2.23333	0.46188		916000	1.7	1.7	3.3	2.23333	0.92376		916000	3.6	3.6	3.6	3.6	0		916000	0.4	2.3	2.3	1.66667	1.09697
	916500	1.5	1.5	1.5	1.5	0		916500	0.9	0.9	1.6	1.13333	0.404145		916500	4.7	4.7	3.8	4.4	0.519615		916500	0.4	2.9	2.9	2.06667	1.44338
	917000	2.5	2.5	2.5	2.5	0		917000	2.9	3.4	4.3	3.53333	0.70946		917000	14.4	10.8	7.2	10.8	3.6		917000	0.5	2.6	2.6	1.9	1.21244
	917500	2.9	2.9	2.9	2.9	0		917500	1.1	2.2	1.1	1.46667	0.635085		917500	13.4	9.3	6.7	9.8	3.37787		917500	0.7	1	1	0.9	0.173205
	918000	2.9	2.9	2.8	2.86667	0.057735		918000	1.9	2.9	2.5	2.43333	0.503322		918000	13.6	12.8	7.3	11.2333	3.42977		918000	0.7	2.6	2.6	1.96667	1.09697
	918500	6.4	6.4	6.4	6.4	1.08779e-15		918500	4.8	4.8	9.9	6.5	2.94449		918500	7.5	5	3.3	5.26667	2.11266		918500	3	12.7	11.2	8.96667	5.22143
	919000	6.7	6.7	6.4	6.6	0.173205		919000	1.7	1.7	3.5	2.3	1.03923		919000	10.7	8.4	5	8.03333	2.86764		919000	4.2	12.5	10.9	9.2	4.40341
	919500	11.6	11.6	10.3	11.1667	0.750555		919500	3.8	4.5	4.3	4.2	0.360555		919500	10.1	10.1	8.4	9.53333	0.981495		919500	1.5	2.6	1.6	1.9	0.608276
	920000	6.3	6.3	6.3	6.3	0		920000	5.1	7.7	7.7	6.83333	1.50111		920000	14.9	13.5	7.2	11.8667	4.10163		920000	1.6	1.6	1	1.4	0.34641
	920500	2.7	2.7	2.7	2.7	5.43896e-16		920500	5.3	5.3	6.4	5.66667	0.635085		920500	4.1	4.1	3.3	3.83333	0.46188		920500	3.4	7.6	2.9	4.63333	2.58134
	921000	3.5	3.5	3.7	3.56667	0.11547		921000	2.8	2.8	5.6	3.73333	1.61658		921000	18	12.6	7.2	12.6	5.4		921000	1.1	3.4	1.3	1.93333	1.2741
	921500	3.5	3.5	4.8	3.93333	0.750555		921500	8.2	8.2	8.5	8.3	0.173205		921500	10.3	10.3	8.6	9.73333	0.981495		921500	0.9	1.2	0.6	0.9	0.3
	922000	7.4	8.9	8.9	8.4	0.866025		922000	7.1	7.1	8.5	7.56667	0.80829		922000	14.7	9.8	6.3	10.2667	4.2194		922000	0.7	0.8	0.6	0.7	0.1
	922500	3.6	3.6	3.6	3.6	0		922500	7.5	7.5	7.5	7.5	0		922500	10.5	8	3.9	7.46667	3.33217		922500	0.7	1.5	1.1	1.1	0.4
	923000	4.4	4.4	4.4	4.4	0		923000	3.2	3.2	3.2	3.2	5.43896e-16		923000	9.3	8.1	4.5	7.3	2.498		923000	2.1	7.3	4.9	4.76667	2.60256
	923500	3.2	3.2	3.2	3.2	5.43896e-16		923500	3	3	3	3	0		923500	13.6	13.6	7.5	11.5667	3.52184		923500	1	3.5	2.6	2.36667	1.26623
	924000	2.3	2.3	2.3	2.3	0		924000	3.5	3.5	3.5	3.5	0		924000	12.1	9.1	6	9.06667	3.05014		924000	0.5	2.9	2.8	2.06667	1.35769
	924500	3.7	3.7	3.7	3.7	5.43896e-16		924500	1.1	1.1	1.1	1.1	0		924500	9.4	4.7	4.7	6.26667	2.71355		924500	0.5	2.7	2.7	1.96667	1.27017
	925000	2.9	2.9	2.9	2.9	0		925000	2.9	2.9	4.3	3.36667	0.80829		925000	5.6	4.6	4.6	4.93333	0.57735		925000	0.5	1	1	0.833333	0.288675
	925500	2.8	2.8	2.8	2.8	5.43896e-16		925500	4.8	5.4	8.2	6.13333	1.81475		925500	14	10.5	5.9	10.1333	4.06243		925500	0.5	3.3	3.3	2.36667	1.61658
	926000	4.7	4.7	4.7	4.7	0		926000	5.5	7.4	5.5	6.13333	1.09697		926000	15.8	10.5	2.8	9.7	6.53682		926000	0.3	1.1	0.7	0.7	0.4
	926500	8.9	8.9	8.9	8.9	0		926500	5.2	6.3	6.5	6	0.7		926500	5.1	5.1	3.2	4.46667	1.09697		926500	0.2	0.4	0.4	0.333333	0.11547
	927000	10.2	10.2	14.4	11.6	2.42487		927000	3.1	3.1	4.1	3.43333	0.57735		927000	12.4	8.3	5.2	8.63333	3.61156		927000	0.2	0.4	0.4	0.333333	0.11547
	927500	7.8	7.8	9.4	8.33333	0.92376		927500	8.9	8.9	8.9	8.9	0		927500	15.5	12.7	11.3	13.1667	2.13854		927500	0.2	0.4	0.4	0.333333	0.11547
	928000	12.2	12.2	12.2	12.2	2.17558e-15		928000	4.8	4.8	4.8	4.8	0		928000	10.8	7.2	5.4	7.8	2.74955		928000	0.2	0.4	0.4	0.333333	0.11547
	928500	6.8	6.8	6.8	6.8	0		928500	1.7	1.7	1.7	1.7	0		928500	10.2	6.8	3.4	6.8	3.4		928500	0.2	1	1	0.733333	0.46188
	929000	9.2	9.2	9.2	9.2	0		929000	0.9	0.9	0.9	0.9	0		929000	17.4	7.9	3.8	9.7	6.97639		929000	0.2	2.8	2.8	1.93333	1.50111
	929500	3.1	3.1	3.1	3.1	0		929500	1.1	1.1	1.1	1.1	0		929500	8.7	8.7	5.9	7.76667	1.61658		929500	0.2	2.2	2.2	1.53333	1.1547
	930000	6	6	7.7	6.56667	0.981495		930000	1.3	1.3	1.3	1.3	0		930000	4.8	4.8	1.8	3.8	1.73205		930000	0.2	6	6	4.06667	3.34863
	930500	1.9	2	2.1	2	0.1		930500	6.2	6.2	6.2	6.2	0		930500	6.3	6.3	2	4.86667	2.48261		930500	0.2	2.7	2.7	1.86667	1.44338
	931000	3.6	4.8	4.8	4.4	0.69282		931000	6.7	6.7	6.7	6.7	0		931000	8.9	8.9	7.4	8.4	0.866025		931000	0.7	7.6	6.1	4.8	3.62905
	931500	8.4	8.4	8.4	8.4	0		931500	4	4	6.1	4.7	1.21244		931500	11	11	11	11	0		931500	4.6	6.5	6.5	5.86667	1.09697
	932000	6.9	6.9	6.9	6.9	1.08779e-15		932000	2.8	2.8	3.7	3.1	0.519615		932000	11.1	5.5	3.7	6.76667	3.85919		932000	1.6	1.6	1.6	1.6	2.71948e-16
	932500	10.6	10.6	10.6	10.6	0		932500	1.5	1.5	1.5	1.5	0		932500	16.2	10.2	5.1	10.5	5.55608		932500	5.2	7.2	7.2	6.53333	1.1547
	933000	5.4	5.4	5.4	5.4	1.08779e-15		933000	1.3	1.3	1.3	1.3	0		933000	13.5	11.8	5.9	10.4	3.98873		933000	3.6	7	5.8	5.46667	1.72434
	933500	1.6	1.6	1.6	1.6	2.71948e-16		933500	1.5	2.2	1.5	1.73333	0.404145		933500	11.5	8.2	4.8	8.16667	3.35012		933500	1	3.1	3.1	2.4	1.21244
	934000	6.5	6.5	6.5	6.5	0		934000	6.9	8.5	6.9	7.43333	0.92376		934000	16.9	15.2	10.3	14.1333	3.42685		934000	2.6	8.1	8.1	6.26667	3.17543
	934500	11.5	11.5	11.5	11.5	0		934500	3.1	5.4	4.1	4.2	1.15326		934500	5.7	5.7	2.8	4.73333	1.67432		934500	1.2	4.5	4.5	3.4	1.90526
	935000	3.9	7.2	7.2	6.1	1.90526		935000	1.8	2.7	2	2.16667	0.472582		935000	9.7	8.8	6	8.16667	1.92959		935000	2.6	7.1	7.1	5.6	2.59808
	935500	1.5	3.1	3.1	2.56667	0.92376		935500	7.5	9	10.5	9	1.5		935500	16.7	7.9	4.4	9.66667	6.33745		935500	1.5	4.8	4.8	3.7	1.90526
	936000	2	2	2	2	0		936000	6.6	8.5	6.6	7.23333	1.09697		936000	17.2	15.2	12.4	14.9333	2.41109		936000	0.8	5.1	5.1	3.66667	2.48261
	936500	7.9	7.9	7.9	7.9	1.08779e-15		936500	6.7	6.7	6.7	6.7	0		936500	16	16	11.2	14.4	2.77128		936500	0.8	7.1	7.1	5	3.63731
	937000	9.5	9.5	9.5	9.5	0		937000	2.5	2.5	2.5	2.5	0		937000	14.3	10.7	7.1	10.7	3.6		937000	0.9	2.1	2.1	1.7	0.69282
	937500	7.8	7.8	11.1	8.9	1.90526		937500	1.8	2.8	2.8	2.46667	0.57735		937500	11.4	10	7.7	9.7	1.86815		937500	1.2	2	1.3	1.5	0.43589
	938000	3	3	7.1	4.36667	2.36714		938000	1.4	1.4	1.7	1.5	0.173205		938000	11.8	8.5	4.7	8.33333	3.55293		938000	1.7	1.7	1.5	1.63333	0.11547
	938500	1.1	1.1	2.2	1.46667	0.635085		938500	1	1	2	1.33333	0.57735		938500	7	7	7	7	0		938500	4.9	11.4	8.8	8.36667	3.27159
	939000	1.5	1.5	2	1.66667	0.288675		939000	4.4	4.4	11.3	6.7	3.98372		939000	17.1	15.2	11.4	14.5667	2.9023		939000	1.1	2.3	2.2	1.86667	0.665833
	939500	6.2	6.2	7.5	6.63333	0.750555		939500	5	5	6.8	5.6	1.03923		939500	13	11.7	11.7	12.1333	0.750555		939500	2.2	2.4	1.3	1.96667	0.585947
	940000	4.6	4.6	4.6	4.6	0		940000	4.9	4.9	7.4	5.73333	1.44338		940000	15	13.1	11.2	13.1	1.9		940000	3.3	4.5	1.5	3.1	1.50997
	940500	10.9	10.9	10.9	10.9	0		940500	3	3	6.1	4.03333	1.78979		940500	20.9	17.4	15.7	18	2.65141		940500	4.3	8.6	4.3	5.73333	2.48261
	941000	12.6	12.6	12.6	12.6	0		941000	1.5	1.5	3.3	2.1	1.03923		941000	11.4	11.4	7.1	9.96667	2.48261		941000	4.8	8.2	8.2	7.06667	1.96299
	941500	4.7	4.7	4.7	4.7	0		941500	1.5	1.5	1.7	1.56667	0.11547		941500	6.5	6.5	4.4	5.8	1.21244		941500	1.7	3.5	3.5	2.9	1.03923
	942000	7	7	7	7	0		942000	9.6	9.6	10.1	9.76667	0.288675		942000	4.6	3.5	2.3	3.46667	1.15036		942000	1	1.8	1.2	1.33333	0.416333
	942500	2.5	2.5	3.7	2.9	0.69282		942500	2.8	2.8	2.8	2.8	5.43896e-16		942500	18.1	12.8	8.5	13.1333	4.80867		942500	0.7	1	0.8	0.833333	0.152753
	943000	2.1	2.1	3.4	2.53333	0.750555		943000	1.5	2.3	2.4	2.06667	0.493288		943000	11.1	7.4	5.3	7.93333	2.93655		943000	0.7	1	0.8	0.833333	0.152753
	943500	2.8	2.8	4.1	3.23333	0.750555		943500	4.1	4.6	7.7	5.46667	1.95021		943500	9	6	4.1	6.36667	2.47049		943500	0.8	1.9	1.1	1.26667	0.568624
	944000	7.6	7.6	9.6	8.26667	1.1547		944000	4.1	8.3	6.6	6.33333	2.11266		944000	13	10.3	6.9	10.0667	3.05669		944000	1	5	3.4	3.13333	2.01329
	944500	5.9	5.9	5.3	5.7	0.34641		944500	1.3	2.5	1.3	1.7	0.69282		944500	9.3	7.7	6.2	7.73333	1.55027		944500	1	2.5	2.5	2	0.866025
	945000	1	1	1	1	0		945000	1.5	2	1.6	1.7	0.264575		945000	15.5	15.5	8.6	13.2	3.98372		945000	0.9	1	1	0.966667	0.057735
	945500	1.7	1.7	1.7	1.7	0		945500	2.1	2.1	5.5	3.23333	1.96299		945500	11.4	11.4	7.1	9.96667	2.48261		945500	0.9	2	2	1.63333	0.635085
	946000	7.4	7.4	7.4	7.4	1.08779e-15		946000	1.1	1.1	2.9	1.7	1.03923		946000	10.7	9.1	7.6	9.13333	1.55027		946000	2.5	5.4	4.4	4.1	1.47309
	946500	2.3	2.3	2.3	2.3	0		946500	2.6	2.6	5	3.4	1.38564		946500	7.2	7.2	5.4	6.6	1.03923		946500	3.1	5.6	4.7	4.46667	1.26623
	947000	6.9	6.9	6.9	6.9	1.08779e-15		947000	1.2	1.2	3.2	1.86667	1.1547		947000	14.4	13.1	9.8	12.4333	2.37136		947000	1.3	2.6	2.6	2.16667	0.750555
	947500	4.7	4.7	5.6	5	0.519615		947500	3.1	3.1	5	3.73333	1.09697		947500	9.5	9.5	6.3	8.43333	1.84752		947500	3.9	5	3.8	4.23333	0.665833
	948000	6.6	6.6	6.9	6.7	0.173205		948000	9.4	9.4	11.3	10.0333	1.09697		948000	16.9	7.7	7.5	10.7	5.37029		948000	4	4	2	3.33333	1.1547
	948500	11.7	11.7	11.7	11.7	2.17558e-15		948500	11.2	11.2	15.4	12.6	2.42487		948500	11.4	8.2	6.8	8.8	2.35797		948500	1.6	4	3.9	3.16667	1.35769
	949000	6.3	6.3	6.3	6.3	0		949000	4.6	7.8	6.9	6.43333	1.65025		949000	11	11	6.2	9.4	2.77128		949000	1.4	4.8	4.5	3.56667	1.88237
	949500	6.5	6.5	7.6	6.86667	0.635085		949500	3.5	5.5	3.5	4.16667	1.1547		949500	13.5	11.8	5.4	10.2333	4.27122		949500	1.4	5.9	4.4	3.9	2.29129
	950000	3.5	3.5	4.6	3.86667	0.635085		950000	3.8	3.8	3.8	3.8	5.43896e-16		950000	15.4	9.2	7.8	10.8	4.04475		950000	1.6	5.3	5.3	4.06667	2.1362
	950500	5.5	5.5	6.6	5.86667	0.635085		950500	2.9	2.9	2.9	2.9	0		950500	8.5	6.8	5.5	6.93333	1.50444		950500	2.8	7.7	7.7	6.06667	2.82902
	951000	6.2	6.2	6.2	6.2	0		951000	3.8	3.8	3.8	3.8	5.43896e-16		951000	14	9.7	7.5	10.4	3.30606		951000	1.2	4	4	3.06667	1.61658
	951500	6.4	6.4	6.4	6.4	1.08779e-15		951500	5.1	6.8	5.1	5.66667	0.981495		951500	7.4	7.4	5.5	6.76667	1.09697		951500	2.2	5.6	5.6	4.46667	1.96299
	952000	7.8	7.8	7.8	7.8	0		952000	6.3	6.3	7.5	6.7	0.69282		952000	14.2	14.2	11	13.1333	1.84752		952000	1	5.1	4.9	3.66667	2.31157
	952500	3.9	3.9	5.1	4.3	0.69282		952500	5.7	5.7	7.1	6.16667	0.80829		952500	21.6	20.9	11.5	18	5.64004		952500	3.8	6.5	5.4	5.23333	1.35769
	953000	4.9	4.9	6.1	5.3	0.69282		953000	5.2	5.2	5.3	5.23333	0.057735		953000	18.6	15.5	12.4	15.5	3.1		953000	2.3	2.3	2.3	2.3	0
	953500	7	7	11.3	8.43333	2.48261		953500	2.7	5.5	4	4.06667	1.40119		953500	12.2	10.4	6.1	9.56667	3.13422		953500	1.5	3.6	3.6	2.9	1.21244
	954000	3.2	3.2	6.3	4.23333	1.78979		954000	6.2	9.8	9.8	8.6	2.07846		954000	6	5.9	4.4	5.43333	0.896289		954000	1.1	2.7	2.7	2.16667	0.92376
	954500	2.4	2.4	3.2	2.66667	0.46188		954500	8.5	8.5	13.6	10.2	2.94449		954500	9.7	5.5	4.1	6.43333	2.91433		954500	2.8	4.9	3.6	3.76667	1.05987
	955000	1.1	1.1	1.1	1.1	0		955000	2.6	5.3	4	3.96667	1.35031		955000	9.4	7.8	4.7	7.3	2.38956		955000	0.7	0.8	0.8	0.766667	0.057735
	955500	2	2.6	2.6	2.4	0.34641		955500	4.7	7.5	7.7	6.63333	1.6773		955500	9.2	9.2	6.1	8.16667	1.78979		955500	0.7	0.8	0.8	0.766667	0.057735
	956000	5.6	8.6	8.6	7.6	1.73205		956000	3	3	3.3	3.1	0.173205		956000	11.2	7.5	6.8	8.5	2.36432		956000	2.3	3.5	2.9	2.9	0.6
	956500	3	4.6	4.6	4.06667	0.92376		956500	1.3	1.3	1.3	1.3	0		956500	18.2	16.2	6.5	13.6333	6.25806		956500	8	11.1	11.1	10.0667	1.78979
	957000	0.8	1.7	1.7	1.4	0.519615		957000	2.6	2.6	2.6	2.6	0		957000	11.9	7.6	6.1	8.53333	3.01054		957000	1.4	4.2	4.2	3.26667	1.61658
	957500	0.8	1.7	1.7	1.4	0.519615		957500	5.3	5.3	5.3	5.3	0		957500	9.3	7.9	5.3	7.5	2.02978		957500	1.1	3.3	3.3	2.56667	1.27017
	958000	1.8	2.7	2.8	2.43333	0.550757		958000	2.3	2.3	2.3	2.3	0		958000	9.5	9.5	7.4	8.8	1.21244		958000	0.9	4.6	4.6	3.36667	2.1362
	958500	9.8	9.8	11	10.2	0.69282		958500	4.2	5.8	4.2	4.73333	0.92376		958500	11.5	11.5	7.3	10.1	2.42487		958500	0.9	5.6	5.6	4.03333	2.71355
	959000	1.7	1.7	2.7	2.03333	0.57735		959000	9.2	11	9.2	9.8	1.03923		959000	11.4	7.6	3.8	7.6	3.8		959000	0.9	2.4	2.4	1.9	0.866025
	959500	2	2	3	2.33333	0.57735		959500	6.4	6.4	6.4	6.4	1.08779e-15		959500	15.2	10.6	5.3	10.3667	4.95412		959500	1.2	2.5	1.7	1.8	0.655744
	960000	4.6	4.6	4.6	4.6	0		960000	2.5	2.5	2.8	2.6	0.173205		960000	10.8	10.8	5.9	9.16667	2.82902		960000	5.7	5.7	5.4	5.6	0.173205
	960500	2.6	2.6	2.6	2.6	0		960500	1.1	1.1	2.3	1.5	0.69282		960500	16.2	16.2	10.4	14.2667	3.34863		960500	1.3	1.3	1.1	1.23333	0.11547
	961000	4.4	4.4	4.4	4.4	0		961000	3.1	3.1	8.5	4.9	3.11769		961000	7	5.3	3.1	5.13333	1.95533		961000	0.7	0.7	0.6	0.666667	0.057735
	961500	2.8	2.8	2.8	2.8	5.43896e-16		961500	5.2	5.2	5.2	5.2	0		961500	8.7	8.7	3.5	6.96667	3.00222		961500	0.7	0.7	0.6	0.666667	0.057735
	962000	7.6	7.6	7.6	7.6	1.08779e-15		962000	5.2	5.2	6.9	5.76667	0.981495		962000	9.1	8.6	5.4	7.7	2.00749		962000	0.9	1.8	1.3	1.33333	0.450925
	962500	3.3	3.3	3.3	3.3	5.43896e-16		962500	2.6	2.6	2.9	2.7	0.173205		962500	18	12.6	7.2	12.6	5.4		962500	0.5	1.8	1.2	1.16667	0.650641
	963000	1.8	1.8	2	1.86667	0.11547		963000	2.7	5	4.1	3.93333	1.15902		963000	9.7	6.5	6.5	7.56667	1.84752		963000	0.3	0.9	0.9	0.7	0.34641
	963500	2.7	2.7	3.4	2.93333	0.404145		963500	1.2	2.5	3.7	2.46667	1.25033		963500	21.2	14.1	6.5	13.9333	7.35142		963500	0.3	0.9	0.9	0.7	0.34641
	964000	1.3	1.3	1.3	1.3	0		964000	1	1.2	1.9	1.36667	0.472582		964000	7.3	5.8	2.6	5.23333	2.40069		964000	0.3	1.7	1.7	1.23333	0.80829
	964500	3.5	3.5	3.5	3.5	0		964500	0.9	0.9	1.8	1.2	0.519615		964500	11.5	7.8	2.6	7.3	4.47102		964500	0.3	1	1	0.766667	0.404145
	965000	2.5	2.5	2.5	2.5	0		965000	1.4	1.4	2.9	1.9	0.866025		965000	21.2	10	5.9	12.3667	7.91981		965000	0.3	2.1	2.1	1.5	1.03923
	965500	1.7	1.7	1.7	1.7	0		965500	1.1	1.1	1.1	1.1	0		965500	7.9	6.3	4.2	6.13333	1.85562		965500	0.3	2.9	2.9	2.03333	1.50111
	966000	2.9	2.9	3.5	3.1	0.34641		966000	3.7	3.7	3.7	3.7	5.43896e-16		966000	7.9	7.9	6.3	7.36667	0.92376		966000	1.4	8.5	7.3	5.73333	3.80044
	966500	2.8	2.8	5.5	3.7	1.55885		966500	3.3	3.3	3.9	3.5	0.34641		966500	19.6	13.7	10.6	14.6333	4.57202		966500	0.9	2.9	2.9	2.23333	1.1547
	967000	2.3	2.3	3.9	2.83333	0.92376		967000	4.4	4.4	5.6	4.8	0.69282		967000	10	6.6	5.6	7.4	2.30651		967000	2	4.4	4.4	3.6	1.38564
	967500	4.3	4.3	6	4.86667	0.981495		967500	6.4	6.4	6.4	6.4	1.08779e-15		967500	7.2	7.2	7.2	7.2	0		967500	1.2	6.2	6.1	4.5	2.85832
	968000	6.7	6.7	6.7	6.7	0		968000	6.5	6.5	7.8	6.93333	0.750555		968000	11.1	11.1	9.3	10.5	1.03923		968000	4	9.6	6.9	6.83333	2.8006
	968500	5	5	3.7	4.56667	0.750555		968500	5.5	5.5	10.2	7.06667	2.71355		968500	19.4	15.9	12.3	15.8667	3.55012		968500	1.2	3.7	2.7	2.53333	1.25831
	969000	2.9	2.9	2.8	2.86667	0.057735		969000	1.7	1.7	3.4	2.26667	0.981495		969000	14.3	12.7	6.4	11.1333	4.17652		969000	3.4	9.2	7.6	6.73333	2.99555
	969500	2.8	2.8	2.8	2.8	5.43896e-16		969500	1.4	1.4	2.9	1.9	0.866025		969500	8.6	8.6	6.4	7.86667	1.27017		969500	1.1	5.1	5.1	3.76667	2.3094
	970000	2.1	2.1	2.1	2.1	0		970000	1.9	1.9	6.5	3.43333	2.65581		970000	12.4	12.4	8.4	11.0667	2.3094		970000	3.6	8.9	8.9	7.13333	3.05996
	970500	2.8	2.8	2.8	2.8	5.43896e-16		970500	10.5	12	10.5	11	0.866025		970500	12.4	7.1	3.9	7.8	4.29302		970500	2.1	4.5	4.5	3.7	1.38564
	971000	1.5	1.5	1.5	1.5	0		971000	10.9	10.9	10.9	10.9	0		971000	14.7	9.6	5.4	9.9	4.65725		971000	0.8	2.4	2.4	1.86667	0.92376
	971500	6.9	6.9	6.9	6.9	1.08779e-15		971500	8.6	8.6	8.6	8.6	0		971500	11.2	9.8	4.4	8.46667	3.59073		971500	1.2	4.5	4.5	3.4	1.90526
	972000	5.1	5.1	5.1	5.1	0		972000	2.6	2.6	6.7	3.96667	2.36714		972000	11.7	7.3	4.4	7.8	3.6756		972000	3.2	8.3	8.3	6.6	2.94449
	972500	3.4	3.4	4.5	3.76667	0.635085		972500	0.8	0.8	2.1	1.23333	0.750555		972500	13.7	13.7	6.7	11.3667	4.04145		972500	1.3	3.8	3.8	2.96667	1.44338
	973000	5.9	5.9	6.5	6.1	0.34641		973000	1.4	1.4	2.6	1.8	0.69282		973000	5.8	4.4	2.9	4.36667	1.45029		973000	2.5	4.6	3.7	3.6	1.05357
	973500	7	7	7	7	0		973500	5.8	5.8	5.8	5.8	0		973500	10.7	7.1	7.1	8.3	2.07846		973500	0.9	4.3	4.3	3.16667	1.96299
	974000	9.3	9.3	9.3	9.3	0		974000	8.8	10.2	8.8	9.26667	0.80829		974000	21.8	14.6	10.9	15.7667	5.54286		974000	3.2	8.5	6.8	6.16667	2.70617
	974500	2.6	2.6	3.9	3.03333	0.750555		974500	6	6	6	6	0		974500	11.6	8.3	8.2	9.36667	1.93477		974500	3.6	5.2	5.2	4.66667	0.92376
	975000	1.8	1.8	2.5	2.03333	0.404145		975000	3	3	4.7	3.56667	0.981495		975000	16.4	10.5	8.2	11.7	4.22966		975000	1.1	2.5	2.5	2.03333	0.80829
	975500	7.1	7.1	7.1	7.1	1.08779e-15		975500	4.9	4.9	9.8	6.53333	2.82902		975500	11.5	9.6	9.2	10.1	1.22882		975500	2.2	4.8	4.7	3.9	1.47309
	976000	2.3	2.3	2.3	2.3	0		976000	9.1	10.9	10.9	10.3	1.03923		976000	11.4	9.5	7.6	9.5	1.9		976000	1.1	7.8	6.9	5.26667	3.63639
	976500	1.7	1.7	1.7	1.7	0		976500	3.4	3.9	5.7	4.33333	1.20968		976500	10	5	5	6.66667	2.88675		976500	0.1	1.2	1.2	0.833333	0.635085
	977000	1.1	1.1	1.1	1.1	0		977000	1.8	1.8	2.4	2	0.34641		977000	11.4	11.4	6.1	9.63333	3.05996		977000	0.1	1.4	1.4	0.966667	0.750555
	977500	2.7	2.7	3.5	2.96667	0.46188		977500	1.9	1.9	1.9	1.9	2.71948e-16		977500	9.5	9.5	3.4	7.46667	3.52184		977500	0.1	0.8	0.8	0.566667	0.404145
	978000	7.7	7.7	7.7	7.7	0		978000	3.1	3.1	3.1	3.1	0		978000	19.8	19.8	10	16.5333	5.65803		978000	0.1	1	1	0.7	0.519615
	978500	1.4	1.4	1.4	1.4	2.71948e-16		978500	6.3	6.3	6.3	6.3	0		978500	8.2	8.2	2.5	6.3	3.2909		978500	0.1	1.2	1.2	0.833333	0.635085
	979000	7.4	7.4	7.4	7.4	1.08779e-15		979000	6.1	7.7	7.7	7.16667	0.92376		979000	8.4	4.8	2.4	5.2	3.01993		979000	0.1	3.4	3.4	2.3	1.90526
	979500	14.7	14.7	14.7	14.7	2.17558e-15		979500	9.5	11.4	9.5	10.1333	1.09697		979500	12.1	12.1	5.4	9.86667	3.86825		979500	0.1	2	2	1.36667	1.09697
	980000	6.4	6.4	6.4	6.4	1.08779e-15		980000	2.9	5.3	5.1	4.43333	1.33167		980000	12.9	9	3.5	8.46667	4.72264		980000	0.1	0.7	0.7	0.5	0.34641
	980500	3.9	3.9	3.9	3.9	0		980500	0.8	1.5	1.2	1.16667	0.351188		980500	11.5	7.7	4.7	7.96667	3.40783		980500	0.1	0.7	0.7	0.5	0.34641
	981000	5.9	5.9	5.9	5.9	1.08779e-15		981000	1	1.4	2.1	1.5	0.556776		981000	10.8	8.9	7.8	9.16667	1.51767		981000	0.1	0.8	0.8	0.566667	0.404145
	981500	4.2	4.2	5.3	4.56667	0.635085		981500	1.3	1.3	2.6	1.73333	0.750555		981500	9.2	9.2	6.1	8.16667	1.78979		981500	0.1	1.1	1.1	0.766667	0.57735
	982000	4.2	4.2	4.2	4.2	0		982000	1.6	2.5	4.6	2.9	1.53948		982000	9.2	7.3	7.3	7.93333	1.09697		982000	0.1	1.4	1.4	0.966667	0.750555
	982500	8.1	8.1	8.1	8.1	0		982500	3.9	5.1	5.8	4.93333	0.960902		982500	9.7	9.7	8.3	9.23333	0.80829		982500	0.4	8.9	7.4	5.56667	4.53689
	983000	3.2	3.2	3.2	3.2	5.43896e-16		983000	4.7	4.7	4.7	4.7	0		983000	8.5	6.3	5.7	6.83333	1.47422		983000	6.5	8.6	8.6	7.9	1.21244
	983500	2	2	3.7	2.56667	0.981495		983500	5.6	5.6	7.9	6.36667	1.32791		983500	6.8	5.1	5.1	5.66667	0.981495		983500	1.2	2.4	2.4	2	0.69282
	984000	3.2	3.2	6.4	4.26667	1.84752		984000	1.1	1.6	1.2	1.3	0.264575		984000	16.7	11.1	5.3	11.0333	5.70029		984000	2.2	5.2	5.2	4.2	1.73205
	984500	3.2	3.2	3.2	3.2	5.43896e-16		984500	0.8	1.4	0.8	1	0.34641		984500	12.9	11.3	4.8	9.66667	4.28991		984500	5.2	6.7	4.2	5.36667	1.25831
	985000	2.5	2.5	2.7	2.56667	0.11547		985000	0.8	1.6	0.8	1.06667	0.46188		985000	15.9	14.3	7	12.4	4.74447		985000	2.6	3.1	3.1	2.93333	0.288675
	985500	7.1	7.1	8.3	7.5	0.69282		985500	1.1	1.7	1.1	1.3	0.34641		985500	7	7	7	7	0		985500	4	7.6	7.6	6.4	2.07846
	986000	22.5	22.5	22.5	22.5	0		986000	2	2	2	2	0		986000	7.5	6	6	6.5	0.866025		986000	0.8	3.6	3.6	2.66667	1.61658
	986500	16.1	16.1	16.1	16.1	0		986500	2.2	3.3	3.7	3.06667	0.776745		986500	6.7	3.3	3.1	4.36667	2.0232		986500	2.3	9.4	5.5	5.73333	3.55575
	987000	2.3	3	3	2.76667	0.404145		987000	5.9	7.8	7.9	7.2	1.12694		987000	13.7	7.8	3.3	8.26667	5.21568		987000	3.9	12.9	9.2	8.66667	4.52364
	987500	1.1	1.1	1.1	1.1	0		987500	2.8	2.8	5.7	3.76667	1.67432		987500	4.3	4.3	4.3	4.3	0		987500	0.9	2.5	2.2	1.86667	0.85049
	988000	5.4	6.3	6.3	6	0.519615		988000	4.7	5.8	5	5.16667	0.568624		988000	13.4	11.2	7.8	10.8	2.82135		988000	0.9	2	2	1.63333	0.635085
	988500	4.2	4.2	5.5	4.63333	0.750555		988500	10.9	14.2	12.2	12.4333	1.66233		988500	14.7	10.3	5.3	10.1	4.70319		988500	1.1	3.1	3	2.4	1.12694
	989000	0.8	0.8	1.1	0.9	0.173205		989000	7.2	7.2	10.1	8.16667	1.67432		989000	9.8	9.4	6.3	8.5	1.91572		989000	7.3	9.9	7.9	8.36667	1.36137
	989500	0.8	0.8	1.5	1.03333	0.404145		989500	3	3	3	3	0		989500	9.8	9.8	9.1	9.56667	0.404145		989500	3	3	3	3	0
	990000	1.5	1.5	2.8	1.93333	0.750555		990000	2	2	2	2	0		990000	7.5	7.5	7.5	7.5	0		990000	1.8	3.8	3	2.86667	1.00664
	990500	2.7	2.7	2.7	2.7	5.43896e-16		990500	3.7	3.8	5.4	4.3	0.953939		990500	6.2	6.2	5.4	5.93333	0.46188		990500	0.9	1.4	1.4	1.23333	0.288675
	991000	1.5	1.5	1.5	1.5	0		991000	3.8	5	7.6	5.46667	1.94251		991000	12.5	12.5	10.9	11.9667	0.92376		991000	1.4	2.4	2.4	2.06667	0.57735
	991500	6.8	6.8	6.8	6.8	0		991500	2.8	2.8	5.2	3.6	1.38564		991500	9.7	9.7	9.1	9.5	0.34641		991500	3.4	7.9	6.8	6.03333	2.34592
	992000	7.3	7.3	7.3	7.3	0		992000	4.7	4.7	7.9	5.76667	1.84752		992000	6.5	6.5	4.8	5.93333	0.981495		992000	0.8	2.2	2.2	1.73333	0.80829
	992500	8.3	8.3	8.3	8.3	0		992500	3.3	3.3	3.3	3.3	5.43896e-16		992500	13.5	10.8	6.4	10.2333	3.58376		992500	0.8	2.5	2.5	1.93333	0.981495
	993000	9.7	9.7	9.7	9.7	0		993000	5.6	5.6	5.6	5.6	1.08779e-15		993000	11	10.6	4.9	8.83333	3.41223		993000	1.8	8	7.4	5.73333	3.41955
	993500	4.6	4.6	4.6	4.6	0		993500	7.1	7.1	7.1	7.1	1.08779e-15		993500	13.1	9.8	5.8	9.56667	3.65559		993500	8.6	13.4	10	10.6667	2.46847
	994000	3.9	3.9	3.9	3.9	0		994000	4.4	5.3	4.4	4.7	0.519615		994000	14	12.3	7	11.1	3.65103		994000	2	5.2	5.2	4.13333	1.84752
	994500	2.5	2.5	3.1	2.7	0.34641		994500	2.3	2.3	2.3	2.3	0		994500	16.2	13.2	9.1	12.8333	3.56417		994500	4.2	6.5	5.2	5.3	1.15326
	995000	0.8	0.8	0.8	0.8	1.35974e-16		995000	5.6	5.6	5.6	5.6	1.08779e-15		995000	8.3	8.3	8.3	8.3	0		995000	5.9	8.8	7	7.23333	1.46401
	995500	0.8	0.8	0.8	0.8	1.35974e-16		995500	10.2	10.2	11.8	10.7333	0.92376		995500	9.6	9.6	4.3	7.83333	3.05996		995500	2.4	4.8	4	3.73333	1.22202
	996000	3.3	3.3	3.3	3.3	5.43896e-16		996000	5.6	6.7	8	6.76667	1.20139		996000	12.7	11.1	7	10.2667	2.93995		996000	2.2	4.4	3.3	3.3	1.1
	996500	9.7	9.7	9.7	9.7	0		996500	7.3	7.3	11.6	8.73333	2.48261		996500	8.7	8.7	8	8.46667	0.404145		996500	1	4.5	4.5	3.33333	2.02073
	997000	4.8	4.8	4.8	4.8	0		997000	8.1	8.1	12.9	9.7	2.77128		997000	14.1	11.3	7.1	10.8333	3.52326		997000	1.3	5.1	2.8	3.06667	1.91398
	997500	6.2	6.2	6.2	6.2	0		997500	9	10.7	9	9.56667	0.981495		997500	14.3	12.6	9	11.9667	2.70617		997500	2.4	3	1.5	2.3	0.754983
	998000	1.8	1.8	1.8	1.8	0		998000	3.2	3.2	5.8	4.06667	1.50111		998000	15.4	15.4	13	14.6	1.38564		998000	2.1	2.1	1.3	1.83333	0.46188
	998500	1.7	1.7	1.7	1.7	0		998500	1.2	1.2	3.3	1.9	1.21244		998500	20.7	20.7	15	18.8	3.2909		998500	1.3	2.9	1.9	2.03333	0.80829
	999000	4	4	4	4	0		999000	3.2	4	5.2	4.13333	1.00664		999000	7.5	7.5	6.7	7.23333	0.46188		999000	1.1	4.6	4.6	3.43333	2.02073
	999500	3.2	3.2	3.2	3.2	5.43896e-16		999500	3.2	3.2	3.6	3.33333	0.23094		999500	14.3	11.1	9.5	11.6333	2.44404		999500	2	3.9	3.9	3.26667	1.09697
	1000000	3.2	3.2	3.2	3.2	5.43896e-16		1000000	1.2	1.6	3	1.93333	0.945163		1000000	7.5	7.5	7.5	7.5	0		1000000	2.3	5.2	5.2	4.23333	1.67432
	1000500	6.3	6.3	6.3	6.3	0		1000500	1.1	2.1	1.6	1.6	0.5		1000500	17.3	13.9	5.2	12.1333	6.24046		1000500	2.8	5.2	5.1	4.36667	1.35769
	1001000	14	14	14	14	0		1001000	3.5	5.3	5	4.6	0.964365		1001000	10.4	10.4	6.7	9.16667	2.1362		1001000	1.3	1.6	1.6	1.5	0.173205
	1001500	3.8	3.8	5	4.2	0.69282		1001500	1.7	1.7	3.3	2.23333	0.92376		1001500	19.3	15.1	10	14.8	4.65725		1001500	2.4	4.7	3.6	3.56667	1.15036
	1002000	7	7	7	7	0		1002000	4.1	4.4	8	5.5	2.17025		1002000	18.2	12.7	7.4	12.7667	5.40031		1002000	2.9	5.9	4.4	4.4	1.5
	1002500	13	13	14.6	13.5333	0.92376		1002500	5.6	7	9.9	7.5	2.19317		1002500	17.7	14.7	8.8	13.7333	4.52806		1002500	3.1	4	2.7	3.26667	0.665833

## Sheet: 4-ethylguaiaco-ab9A
	GC-SSR dose response curve
4-ethylguaiacol	Log dilution -4							Log dilution-5							Log dilution-6							Log dilution-7
	T[ms]	F[Hz]	F[Hz]	F[Hz]	Average	SD		T[ms]	F[Hz]	F[Hz]	F[Hz]	Average	SD		T[ms]	F[Hz]	F[Hz]	F[Hz]	Average	SD		T[ms]	F[Hz]	F[Hz]	F[Hz]	Average	SD
	150000	34.4	26.7	26.7	29.2667	4.4456		150000	33.6	30	23.7	29.1	5.01099		150000	15.3	32.6	30.7	26.2	9.48736		150000	27.8	27.5	27.5	27.6	0.173205
	150500	40.3	38.5	38.5	39.1	1.03923		150500	37.7	37.7	35.8	37.0667	1.09697		150500	11.5	31	31	24.5	11.2583		150500	27.5	23.9	23.9	25.1	2.07846
	151000	42.2	30.8	30.8	34.6	6.58179		151000	36.6	32.9	31.1	33.5333	2.80416		151000	12.9	38.6	38.6	30.0333	14.8379		151000	39.8	29.1	29.1	32.6667	6.17765
	151500	36.4	32.5	32.5	33.8	2.25167		151500	44.8	43.1	37.5	41.8	3.81969		151500	22.4	33.9	31.8	29.3667	6.124		151500	36.1	32.3	32.3	33.5667	2.19393
	152000	47.6	31.3	31.3	36.7333	9.41081		152000	37.2	37.2	30.4	34.9333	3.92598		152000	18.5	27.8	27.8	24.7	5.36936		152000	30.5	29.6	27.2	29.1	1.70587
	152500	31.1	25.3	25.3	27.2333	3.34863		152500	39.8	38	36.2	38	1.8		152500	28.2	33.2	33.2	31.5333	2.88675		152500	19.3	19.3	17.4	18.6667	1.09697
	153000	38.9	24.6	24.6	29.3667	8.25611		153000	40.7	38.6	34.7	38	3.04467		153000	21.6	30.4	30.4	27.4667	5.08068		153000	35.2	31.5	29.7	32.1333	2.80416
	153500	40.2	30	30	33.4	5.88897		153500	41	41	35.2	39.0667	3.34863		153500	15.2	32.1	32.1	26.4667	9.75722		153500	29.2	29.2	29.2	29.2	0
	154000	38.9	37	37	37.6333	1.09697		154000	53.2	51.3	49.3	51.2667	1.95021		154000	21.4	27.5	27.5	25.4667	3.52184		154000	33.2	29.7	29.7	30.8667	2.02073
	154500	40.2	30.6	30.6	33.8	5.54256		154500	41.2	37.6	30.8	36.5333	5.28141		154500	24.2	30.1	30.1	28.1333	3.40637		154500	35.3	35.3	35.3	35.3	0
	155000	44.1	31.2	31.2	35.5	7.44782		155000	36.8	36.8	31.3	34.9667	3.17543		155000	25.8	20.9	20.9	22.5333	2.82902		155000	35.3	33.4	33.4	34.0333	1.09697
	155500	45.2	37.3	37.3	39.9333	4.56107		155500	44.1	38.3	36.4	39.6	4.01123		155500	20.8	27.9	27.9	25.5333	4.09919		155500	35.5	33.6	33.6	34.2333	1.09697
	156000	34.7	23.4	23.4	27.1667	6.52406		156000	38.9	36.9	31.1	35.6333	4.05134		156000	22.2	33.7	29.7	28.5333	5.83809		156000	30.6	28.2	28.2	29	1.38564
	156500	33.3	29.9	28.3	30.5	2.55343		156500	39.4	37.6	30.8	35.9333	4.53578		156500	27.3	25.5	23.3	25.3667	2.00333		156500	36.6	33	33	34.2	2.07846
	157000	37	30	30	32.3333	4.04145		157000	30.2	30.2	28.4	29.6	1.03923		157000	35.5	23.6	23.6	27.5667	6.87047		157000	33.1	31.3	31.3	31.9	1.03923
	157500	37.9	30.3	30.3	32.8333	4.38786		157500	40.7	38.9	37.2	38.9333	1.75024		157500	31.6	25.7	25.7	27.6667	3.40637		157500	31.3	31.3	31.3	31.3	0
	158000	37.6	29.4	29.4	32.1333	4.73427		158000	39.5	32.8	29.2	33.8333	5.22717		158000	26.2	35	35	32.0667	5.08068		158000	29.3	25.8	25.8	26.9667	2.02073
	158500	37	33.3	31.4	33.9	2.84781		158500	40.8	40.8	35.2	38.9333	3.23316		158500	24.2	23.9	23.9	24	0.173205		158500	37.5	32.2	26.3	32	5.60268
	159000	38.5	28.9	27.1	31.5	6.12862		159000	53.8	44.2	44.2	47.4	5.54256		159000	22.5	41	41	34.8333	10.681		159000	29.8	29.8	25.8	28.4667	2.3094
	159500	36.2	24.5	22.3	27.6667	7.4715		159500	45	43.1	41.3	43.1333	1.85023		159500	20.6	33.4	29.7	27.9	6.58711		159500	33.4	29.9	28.2	30.5	2.65141
	160000	34.5	22.4	18.7	25.2	8.26378		160000	33.6	27.9	26	29.1667	3.95517		160000	31.3	21.7	20	24.3333	6.09289		160000	31.9	26.3	26.3	28.1667	3.23316
	160500	39.5	26.4	25.8	30.5667	7.74231		160500	34.1	34.1	29.4	32.5333	2.71355		160500	30.3	34.6	30.7	31.8667	2.37557		160500	34.6	32.7	30.8	32.7	1.9
	161000	43.7	36.4	36.4	38.8333	4.21466		161000	23.2	23.2	21.1	22.5	1.21244		161000	24.8	30.4	28.6	27.9333	2.8589		161000	33	33	33	33	0
	161500	37.7	30.3	28.5	32.1667	4.87579		161500	38	32.6	29	33.2	4.5299		161500	19.1	36.2	34.4	29.9	9.39628		161500	31.3	31.3	31.3	31.3	0
	162000	37.7	28.2	28.2	31.3667	5.48483		162000	35.8	32.1	27.4	31.7667	4.20991		162000	18.1	35.1	35.1	29.4333	9.81495		162000	33.2	31.3	31.3	31.9333	1.09697
	162500	36	30.5	30.5	32.3333	3.17543		162500	37	35.1	29.2	33.7667	4.06735		162500	18.2	23.6	23.6	21.8	3.11769		162500	31.8	31.8	29.9	31.1667	1.09697
	163000	36.2	32.4	30.5	33.0333	2.9023		163000	37.2	35.2	33.2	35.2	2		163000	21.5	35.5	35.5	30.8333	8.0829		163000	31.1	23.7	23.7	26.1667	4.27239
	163500	36.4	28.7	28.7	31.2667	4.4456		163500	28.2	28.2	26.5	27.6333	0.981495		163500	21.2	26	26	24.4	2.77128		163500	20.7	18	18	18.9	1.55885
	164000	43.5	30.8	30.8	35.0333	7.33235		164000	37.5	35.5	32.1	35.0333	2.73008		164000	26.8	25.1	23.1	25	1.85203		164000	30.9	27.2	27.2	28.4333	2.1362
	164500	39.2	30.3	30.3	33.2667	5.13842		164500	35.2	31.5	25.9	30.8667	4.68224		164500	27.9	25.4	23.7	25.6667	2.11266		164500	34.5	31.1	31.1	32.2333	1.96299
	165000	36.4	31	31	32.8	3.11769		165000	36.1	34.4	34.4	34.9667	0.981495		165000	24.4	28.4	28.4	27.0667	2.3094		165000	18.6	18.6	18.6	18.6	0
	165500	39.7	32.4	32.4	34.8333	4.21466		165500	40.7	34.4	27.5	34.2	6.60227		165500	15.7	23.2	23.2	20.7	4.33013		165500	27.8	26	26	26.6	1.03923
	166000	39.4	35.6	35.6	36.8667	2.19393		166000	44.8	44.8	42.9	44.1667	1.09697		166000	28.2	24.2	22.6	25	2.88444		166000	38	36.1	36.1	36.7333	1.09697
	166500	34.1	26	26	28.7	4.67654		166500	39.5	39.5	37.7	38.9	1.03923		166500	23.1	29.4	27.8	26.7667	3.27465		166500	27.5	23.8	23.8	25.0333	2.1362
	167000	43.9	34.7	34.7	37.7667	5.31162		167000	41.5	41.5	37.7	40.2333	2.19393		167000	20.3	23.9	23.9	22.7	2.07846		167000	33.9	33.9	33.9	33.9	0
	167500	42.4	27.6	27.6	32.5333	8.54478		167500	34.1	30.6	27	30.5667	3.55012		167500	10.5	20.7	20.7	17.3	5.88897		167500	29.2	27.4	25.6	27.4	1.8
	168000	42.4	32.7	32.7	35.9333	5.6003		168000	29	27.3	23.9	26.7333	2.59679		168000	17.2	30.7	30.7	26.2	7.79423		168000	28.3	28.3	26.7	27.7667	0.92376
	168500	47.4	36.5	34.6	39.5	6.90724		168500	37.6	32.5	32.5	34.2	2.94449		168500	22.3	32.5	32.5	29.1	5.88897		168500	24.7	24	24	24.2333	0.404145
	169000	43.9	34.2	34.2	37.4333	5.6003		169000	36.5	32.7	28.8	32.6667	3.85011		169000	24.9	33.3	31.4	29.8667	4.40492		169000	37.3	35.5	35.5	36.1	1.03923
	169500	47.4	33.7	33.7	38.2667	7.9097		169500	50	46.3	40.7	45.6667	4.68224		169500	24.6	35	35	31.5333	6.00444		169500	27.4	25.4	23.5	25.4333	1.95021
	170000	41.5	29.6	29.6	33.5667	6.87047		170000	40.2	38.5	38.5	39.0667	0.981495		170000	17.1	27.1	25.1	23.1	5.2915		170000	41.3	31.6	31.6	34.8333	5.6003
	170500	32.1	19.6	19.6	23.7667	7.21688		170500	38.6	36.8	31	35.4667	3.97157		170500	14.8	32.9	29.7	25.8	9.65971		170500	32.6	32.6	32.6	32.6	0
	171000	39.2	31.4	31.4	34	4.50333		171000	45.2	45.2	45.2	45.2	8.70234e-15		171000	24.3	19.1	19.1	20.8333	3.00222		171000	40	36.1	34.2	36.7667	2.95691
	171500	37.2	26.7	26.7	30.2	6.06218		171500	40.2	38.3	38.3	38.9333	1.09697		171500	16.2	33.3	33.3	27.6	9.87269		171500	26.7	26.7	24.9	26.1	1.03923
	172000	42.2	27.3	27.3	32.2667	8.60252		172000	37.9	36	32.2	35.3667	2.9023		172000	19.9	33.2	31.3	28.1333	7.19328		172000	29.8	27.8	27.8	28.4667	1.1547
	172500	38.9	31.1	31.1	33.7	4.50333		172500	38.3	36.5	36.5	37.1	1.03923		172500	28	38.2	38.2	34.8	5.88897		172500	33.7	29.8	29.8	31.1	2.25167
	173000	32.8	31	27.2	30.3333	2.8589		173000	36.9	32.5	30.7	33.3667	3.18957		173000	16	23	21.4	20.1333	3.66788		173000	32.3	32.3	32.3	32.3	0
	173500	35.6	28.1	28.1	30.6	4.33013		173500	35.2	33.4	31.6	33.4	1.8		173500	21.5	22.6	22.6	22.2333	0.635085		173500	31.9	31.9	30.1	31.3	1.03923
	174000	43.9	32.9	32.9	36.5667	6.35085		174000	28	28	24.3	26.7667	2.1362		174000	21.9	22.4	22.4	22.2333	0.288675		174000	36	30.6	28.7	31.7667	3.78726
	174500	40.7	38.8	38.8	39.4333	1.09697		174500	30.6	26.8	24.9	27.4333	2.9023		174500	21.6	35	33.1	29.9	7.25052		174500	35.6	33.8	33.8	34.4	1.03923
	175000	40.7	32.9	32.9	35.5	4.50333		175000	47.8	42.6	37.2	42.5333	5.30031		175000	13.5	33.2	33.2	26.6333	11.3738		175000	33.1	29.4	27.6	30.0333	2.80416
	175500	43.9	32.5	32.5	36.3	6.58179		175500	33.9	30.1	28.2	30.7333	2.9023		175500	28.7	25.9	25.9	26.8333	1.61658		175500	34.5	32.7	31.7	32.9667	1.41892
	176000	37.3	37.3	37.3	37.3	0		176000	49.5	45.5	45.5	46.8333	2.3094		176000	27.6	31.8	31.8	30.4	2.42487		176000	32.4	30.6	27	30	2.74955
	176500	45	39.1	39.1	41.0667	3.40637		176500	41.3	36	30.5	35.9333	5.40031		176500	27.1	27.2	25.4	26.5667	1.0116		176500	35.6	31.5	31.5	32.8667	2.36714
	177000	43.1	28	28	33.0333	8.71799		177000	47.4	45	43.1	45.1667	2.15484		177000	23.6	42.7	42.7	36.3333	11.0274		177000	33	31.3	27.8	30.7	2.65141
	177500	42.6	33.2	33.2	36.3333	5.42709		177500	42.6	38.6	34.7	38.6333	3.95011		177500	28.7	28.9	28.9	28.8333	0.11547		177500	34	30.3	26.5	30.2667	3.75011
	178000	32.9	29.1	29.1	30.3667	2.19393		178000	53.2	49.8	44.1	49.0333	4.59819		178000	33.4	34.2	30.4	32.6667	2.00333		178000	23	21.4	21.4	21.9333	0.92376
	178500	42.6	27.1	25.2	31.6333	9.54481		178500	48.3	36.4	36.4	40.3667	6.87047		178500	24.6	30.5	28.7	27.9333	3.02379		178500	25.8	24	24	24.6	1.03923
	179000	36.5	34.1	32.4	34.3333	2.05994		179000	42.6	40.7	38.8	40.7	1.9		179000	28.4	29.7	27.9	28.6667	0.929157		179000	40.8	39.1	39.1	39.6667	0.981495
	179500	42.2	32.6	30.7	35.1667	6.16468		179500	37.6	37.6	35.6	36.9333	1.1547		179500	32.2	35.7	33.8	33.9	1.75214		179500	33.6	27.9	27.9	29.8	3.2909
	180000	39.5	31.9	31.9	34.4333	4.38786		180000	42.9	39.4	35.8	39.3667	3.55012		180000	36	25.4	23.7	28.3667	6.66508		180000	30.8	29	29	29.6	1.03923
	180500	42.2	29.3	29.3	33.6	7.44782		180500	33.7	29.9	28	30.5333	2.9023		180500	22.7	20.6	20.6	21.3	1.21244		180500	31.4	31.4	29.4	30.7333	1.1547
	181000	33.4	29.8	29.8	31	2.07846		181000	42.4	40.5	37.7	40.2	2.36432		181000	21.3	31.1	29.4	27.2667	5.23673		181000	27.2	25.2	25.1	25.8333	1.18462
	181500	41.8	33.9	33.9	36.5333	4.56107		181500	42.2	40.3	38.3	40.2667	1.95021		181500	25.7	27.8	25.9	26.4667	1.15902		181500	36.5	36.5	36.5	36.5	0
	182000	28.7	24.2	24.2	25.7	2.59808		182000	36.2	36.2	31.4	34.6	2.77128		182000	27.7	26.9	26.9	27.1667	0.46188		182000	37.7	34	34	35.2333	2.1362
	182500	38	28.5	28.5	31.6667	5.48483		182500	36.8	36.8	33	35.5333	2.19393		182500	22.7	29.2	29.2	27.0333	3.75278		182500	35	33	33	33.6667	1.1547
	183000	37.6	28.2	28.2	31.3333	5.42709		183000	38.8	35.1	33.2	35.7	2.84781		183000	23.4	42	42	35.8	10.7387		183000	45.9	45.9	43.1	44.9667	1.61658
	183500	35.8	29	29	31.2667	3.92598		183500	46.5	46.5	42.7	45.2333	2.19393		183500	19.8	28	28	25.2667	4.73427		183500	31.7	30	26.5	29.4	2.65141
	184000	39.2	25.5	25.5	30.0667	7.9097		184000	37.7	33.4	27.8	32.9667	4.96421		184000	26.7	31	31	29.5667	2.48261		184000	30.8	25.1	25.1	27	3.2909
	184500	44.1	27.2	27.2	32.8333	9.75722		184500	45.9	40.2	30.6	38.9	7.7324		184500	34.8	29.2	27.4	30.4667	3.85919		184500	36.4	34.6	34.6	35.2	1.03923
	185000	28.7	23	23	24.9	3.2909		185000	42.2	41.2	38	40.4667	2.19393		185000	21.7	29.2	29.2	26.7	4.33013		185000	39.2	37.3	37.3	37.9333	1.09697
	185500	34	30.5	30.5	31.6667	2.02073		185500	34.7	29.9	28.2	30.9333	3.37095		185500	13.6	27.2	27.2	22.6667	7.85196		185500	34.1	32.3	32.3	32.9	1.03923
	186000	42.6	34.7	34.7	37.3333	4.56107		186000	37.2	31.3	27.4	31.9667	4.9339		186000	14.6	22.5	22.5	19.8667	4.56107		186000	26.3	24.8	23	24.7	1.65227
	186500	28.5	21.6	21.6	23.9	3.98372		186500	49.3	45.5	43.5	46.1	2.94618		186500	10.3	35.2	35.2	26.9	14.376		186500	26.1	24.3	24.3	24.9	1.03923
	187000	36.2	26.7	26.7	29.8667	5.48483		187000	43.9	42	34.4	40.1	5.02693		187000	16.3	28.9	27	24.0667	6.79289		187000	37	29.6	29.6	32.0667	4.27239
	187500	40.7	36.8	36.8	38.1	2.25167		187500	34.7	32.8	32.8	33.4333	1.09697		187500	25.1	28	28	27.0333	1.67432		187500	32.6	28.9	28.9	30.1333	2.1362
	188000	42.6	29.6	29.6	33.9333	7.50555		188000	30	28.2	26.2	28.1333	1.90088		188000	34.8	41.7	39.8	38.7667	3.56417		188000	39.2	31.3	31.3	33.9333	4.56107
	188500	30.5	19.2	19.2	22.9667	6.52406		188500	49.8	35.5	34.4	39.9	8.59127		188500	18.9	28.7	27	24.8667	5.23673		188500	37.2	33.4	33.4	34.6667	2.19393
	189000	41.8	30	30	33.9333	6.81273		189000	45.9	42	40.2	42.7	2.91376		189000	21.3	36.2	36.2	31.2333	8.60252		189000	37.5	37.5	37.5	37.5	0
	189500	46.1	33.3	33.3	37.5667	7.39008		189500	46.5	42.7	42.7	43.9667	2.19393		189500	26	49.3	49.3	41.5333	13.4523		189500	28.5	26.7	24.9	26.7	1.8
	190000	33.8	30	30	31.2667	2.19393		190000	44.2	38	34.5	38.9	4.91223		190000	24	24.8	24.8	24.5333	0.46188		190000	27.3	26.6	26.6	26.8333	0.404145
	190500	34.8	31.1	31.1	32.3333	2.1362		190500	46.7	37.3	37.3	40.4333	5.42709		190500	26.4	26	26	26.1333	0.23094		190500	44.4	35.2	35.2	38.2667	5.31162
	191000	44.1	33.1	33.1	36.7667	6.35085		191000	41.8	39.8	36.1	39.2333	2.89194		191000	24.6	31	31	28.8667	3.69504		191000	32.2	26.5	24.6	27.7667	3.95517
	191500	44.1	28.7	28.7	33.8333	8.89119		191500	34.6	32.7	28.8	32.0333	2.95691		191500	29.4	19.9	19.9	23.0667	5.48483		191500	24.6	22.7	22.7	23.3333	1.09697
	192000	45.5	33.8	33.8	37.7	6.755		192000	42.6	39.5	37.7	39.9333	2.47857		192000	11.3	27.5	27.5	22.1	9.35307		192000	36.5	32.8	32.8	34.0333	2.1362
	192500	37.5	24.9	24.9	29.1	7.27461		192500	41.2	37.5	35.6	38.1	2.84781		192500	19	24.4	24.4	22.6	3.11769		192500	36.4	31.6	28.7	32.2333	3.88887
	193000	47.6	31.7	31.7	37	9.17987		193000	40.8	40.8	40.8	40.8	0		193000	30.3	36	34.1	33.4667	2.9023		193000	36.9	33	31.1	33.6667	2.95691
	193500	30.2	28.2	28.2	28.8667	1.1547		193500	45.2	45.2	43.3	44.5667	1.09697		193500	32.5	24.6	24.6	27.2333	4.56107		193500	27.5	26	26	26.5	0.866025
	194000	29.7	24.4	24.4	26.1667	3.05996		194000	37.5	35.6	31.8	34.9667	2.9023		194000	20.2	18.7	18.7	19.2	0.866025		194000	34.7	32.9	32.9	33.5	1.03923
	194500	39.5	31.6	31.6	34.2333	4.56107		194500	39.4	33.8	28.2	33.8	5.6		194500	21.7	26.7	26.7	25.0333	2.88675		194500	25.7	22.1	22.1	23.3	2.07846
	195000	40.7	34.6	34.6	36.6333	3.52184		195000	34.8	32.9	25.1	30.9333	5.14036		195000	29.5	32.5	32.5	31.5	1.73205		195000	31.4	29.6	29.6	30.2	1.03923
	195500	38.8	31.1	31.1	33.6667	4.4456		195500	41	39.2	37.3	39.1667	1.85023		195500	21.1	31	31	27.7	5.71577		195500	28.3	20.7	20.7	23.2333	4.38786
	196000	41.5	32.6	32.6	35.5667	5.13842		196000	31.2	29.3	25.6	28.7	2.84781		196000	30.3	36.9	36.9	34.7	3.81051		196000	35.6	25.5	23.9	28.3333	6.34376
	196500	51.8	41.7	41.7	45.0667	5.83124		196500	41.5	39.7	37.7	39.6333	1.90088		196500	27.2	39.2	37.3	34.5667	6.45006		196500	30	28.2	28.2	28.8	1.03923
	197000	38	31.2	31.2	33.4667	3.92598		197000	41	37.3	27.9	35.4	6.75352		197000	24.4	32.2	28.6	28.4	3.90384		197000	28.5	26.7	26.7	27.3	1.03923
	197500	31.6	16.6	16.6	21.6	8.66025		197500	38.6	36.8	36.8	37.4	1.03923		197500	28.2	30.1	30.1	29.4667	1.09697		197500	29.4	27.6	25.9	27.6333	1.75024
	198000	39.4	26.2	26.2	30.6	7.62102		198000	45	36.1	28.9	36.6667	8.06494		198000	29.2	38.8	38.8	35.6	5.54256		198000	30	26.3	26.3	27.5333	2.1362
	198500	35.7	31.9	31.9	33.1667	2.19393		198500	37	31.5	29.7	32.7333	3.80307		198500	36.2	26.6	26.6	29.8	5.54256		198500	24.1	24.1	24.1	24.1	4.35117e-15
	199000	36.9	26.9	26.9	30.2333	5.7735		199000	41.2	41.2	35.3	39.2333	3.40637		199000	21.1	34.2	34.2	29.8333	7.56329		199000	27.7	26	22.8	25.5	2.48797
	199500	42.9	25.3	25.3	31.1667	10.1614		199500	41.2	39.2	35.5	38.6333	2.89194		199500	22	37.7	37.7	32.4667	9.0644		199500	30.6	29.1	29.1	29.6	0.866025
	200000	37.7	25.7	25.7	29.7	6.9282		200000	35	33.1	30	32.7	2.52389		200000	23.4	28.2	22.6	24.7333	3.02875		200000	21.1	19.3	19.3	19.9	1.03923
	200500	36.2	30.5	30.5	32.4	3.2909		200500	47.2	46.9	42.9	45.6667	2.40069		200500	23.9	33.3	31.7	29.6333	5.02925		200500	30.9	27	25.1	27.6667	2.95691
	201000	31.6	27.9	27.9	29.1333	2.1362		201000	39.1	35.3	33.7	36.0333	2.77369		201000	31.4	32.8	32.8	32.3333	0.80829		201000	37.2	30.1	28.2	31.8333	4.74377
	201500	32.3	27.8	27.8	29.3	2.59808		201500	44.4	41.5	41.5	42.4667	1.67432		201500	18.1	31.3	31.3	26.9	7.62102		201500	32.1	32.1	30.2	31.4667	1.09697
	202000	39.8	26.3	26.3	30.8	7.79423		202000	29.4	29.4	27.5	28.7667	1.09697		202000	14.4	28.2	28.2	23.6	7.96743		202000	27.2	25.3	25.3	25.9333	1.09697
	202500	31.6	27.6	25.6	28.2667	3.05505		202500	39.5	34.1	30.5	34.7	4.5299		202500	17	30	30	25.6667	7.50555		202500	40.2	40.2	36.5	38.9667	2.1362
	203000	38.6	27.2	25.4	30.4	7.15821		203000	43.1	35.3	33.4	37.2667	5.14036		203000	19.3	33	33	28.4333	7.9097		203000	33.9	26.4	24.4	28.2333	5.00833
	203500	42.6	31	31	34.8667	6.69726		203500	46.5	42.7	42.7	43.9667	2.19393		203500	18.7	33.2	31.3	27.7333	7.88057		203500	32.3	25.8	25.8	27.9667	3.75278
	204000	41	35.2	35.2	37.1333	3.34863		204000	37.3	35.3	31.6	34.7333	2.89194		204000	25.1	33.1	33.1	30.4333	4.6188		204000	27.9	26.1	26.1	26.7	1.03923
	204500	45.9	30.4	30.4	35.5667	8.94893		204500	39.8	36.2	32.6	36.2	3.6		204500	28.7	25.1	23.1	25.6333	2.83784		204500	26.5	18.9	18.9	21.4333	4.38786
	205000	39.8	35.3	33.3	36.1333	3.32916		205000	31.3	31.3	31.3	31.3	0		205000	24.9	33.8	33.8	30.8333	5.13842		205000	44.2	36.9	33.2	38.1	5.59732
	205500	40.7	33	33	35.5667	4.4456		205500	42.2	40.2	37.2	39.8667	2.51661		205500	24.5	38.8	36.9	33.4	7.76595		205500	31.9	31.9	31.9	31.9	4.35117e-15
	206000	39.7	30.3	30.3	33.4333	5.42709		206000	35.1	33.2	29.6	32.6333	2.79344		206000	17.3	25.4	25.4	22.7	4.67654		206000	26.2	24.5	24.5	25.0667	0.981495
	206500	46.5	35.5	35.5	39.1667	6.35085		206500	40.5	38.8	37.2	38.8333	1.65025		206500	22.5	26.9	25.1	24.8333	2.21209		206500	32.9	31.1	31.1	31.7	1.03923
	207000	44.6	37.3	37.3	39.7333	4.21466		207000	34.4	32.6	27.5	31.5	3.57911		207000	24	49	45	39.3333	13.4288		207000	35.5	32.1	32.1	33.2333	1.96299
	207500	38.8	34.8	34.8	36.1333	2.3094		207500	33.1	27.3	27.3	29.2333	3.34863		207500	24.6	35.8	35.8	32.0667	6.46632		207500	27.1	27.1	27.1	27.1	4.35117e-15
	208000	39.1	31.6	31.6	34.1	4.33013		208000	29.4	25.8	18.4	24.5333	5.60833		208000	7.8	31.5	31.5	23.6	13.6832		208000	49.8	43.9	43.9	45.8667	3.40637
	208500	50	36.1	36.1	40.7333	8.02517		208500	49	47.2	43.1	46.4333	3.02379		208500	20.5	32.3	32.3	28.3667	6.81273		208500	27.8	24.1	24.1	25.3333	2.1362
	209000	40.2	30.6	30.6	33.8	5.54256		209000	43.3	41.5	39.5	41.4333	1.90088		209000	20.5	30.2	30.2	26.9667	5.6003		209000	39.5	35.7	35.7	36.9667	2.19393
	209500	38.6	30.7	28.9	32.7333	5.15978		209500	45	44.4	38.9	42.7667	3.36204		209500	22.8	26.4	26.4	25.2	2.07846		209500	42.6	40.7	40.7	41.3333	1.09697
	210000	39.1	26.5	24.9	30.1667	7.77775		210000	37.9	36	34	35.9667	1.95021		210000	23.6	30.9	30.9	28.4667	4.21466		210000	22.1	20.2	20.2	20.8333	1.09697
	210500	40.8	33	33	35.6	4.50333		210500	44.6	40.8	36.8	40.7333	3.90043		210500	23.3	30.5	28.7	27.5	3.747		210500	39.8	34.1	34.1	36	3.2909
	211000	27.4	23.1	23.1	24.5333	2.48261		211000	44.6	42.7	40.7	42.6667	1.95021		211000	23.8	35.1	35.1	31.3333	6.52406		211000	27	25.3	25.3	25.8667	0.981495
	211500	42.4	26.5	26.5	31.8	9.17987		211500	45.5	43.9	40.3	43.2333	2.66333		211500	22.3	35.5	33.7	30.5	7.15821		211500	40.3	36.5	36.5	37.7667	2.19393
	212000	43.1	24.4	24.4	30.6333	10.7965		212000	41.2	39.2	39.2	39.8667	1.1547		212000	20.6	32.4	29.9	27.6333	6.21798		212000	37.2	37.2	37.2	37.2	0
	212500	38.3	32.6	32.6	34.5	3.2909		212500	36.4	34.5	32.6	34.5	1.9		212500	14.4	26.2	24.5	21.7	6.37887		212500	25.3	21.6	21.6	22.8333	2.1362
	213000	36.5	28.8	28.8	31.3667	4.4456		213000	33.9	30.3	26.7	30.3	3.6		213000	20.1	26.3	26.3	24.2333	3.57957		213000	34.5	34.5	34.5	34.5	0
	213500	38.3	30.7	30.7	33.2333	4.38786		213500	35.5	35.5	33.6	34.8667	1.09697		213500	31.5	38.6	36.8	35.6333	3.69098		213500	27.2	22.1	20.4	23.2333	3.53883
	214000	35.8	28.3	28.3	30.8	4.33013		214000	45.5	43.7	41.7	43.6333	1.90088		214000	23	22	22	22.3333	0.57735		214000	32.5	28.6	26.7	29.2667	2.95691
	214500	36.2	32.5	30.5	33.0667	2.89194		214500	41.3	39.2	39.2	39.9	1.21244		214500	23.1	34.2	34.2	30.5	6.40859		214500	37.5	33.9	33.9	35.1	2.07846
	215000	30.2	26.8	26.8	27.9333	1.96299		215000	38.5	36.6	34.8	36.6333	1.85023		215000	23.6	31.5	31.5	28.8667	4.56107		215000	31.2	27.5	27.5	28.7333	2.1362
	215500	33.8	31.9	31.9	32.5333	1.09697		215500	37	35.2	35.2	35.8	1.03923		215500	19.3	18.5	18.5	18.7667	0.46188		215500	28.2	28.2	28.2	28.2	0
	216000	34.1	28.7	26.9	29.9	3.747		216000	39.5	35.8	32.1	35.8	3.7		216000	29.5	27.8	27.8	28.3667	0.981495		216000	34	32.3	32.3	32.8667	0.981495
	216500	39.8	32.6	30.9	34.4333	4.72476		216500	51.3	45.2	43.3	46.6	4.17971		216500	22.6	34.6	32.8	30	6.47148		216500	38.5	33	27.5	33	5.5
	217000	40.3	28.3	28.3	32.3	6.9282		217000	42.7	42.7	38.9	41.4333	2.19393		217000	32.4	26.8	26.8	28.6667	3.23316		217000	36	34	32.2	34.0667	1.90088
	217500	47.6	32.6	32.6	37.6	8.66025		217500	46.9	39.2	35.2	40.4333	5.94671		217500	27	31	29.3	29.1	2.00749		217500	37.3	33.6	33.6	34.8333	2.1362
	218000	36.5	27.5	27.5	30.5	5.19615		218000	42.2	38.5	34.2	38.3	4.00375		218000	26.1	21.9	21.9	23.3	2.42487		218000	23	23	23	23	0
	218500	39.4	26.8	26.8	31	7.27461		218500	32.7	29.2	27.5	29.8	2.65141		218500	19.7	23.8	23.8	22.4333	2.36714		218500	31.8	30.1	30.1	30.6667	0.981495
	219000	36.8	30.1	28.4	31.7667	4.4411		219000	35.8	34	34	34.6	1.03923		219000	26.8	26.1	26.1	26.3333	0.404145		219000	26.4	24.5	24.5	25.1333	1.09697
	219500	37.3	25.6	25.6	29.5	6.755		219500	40.2	36.2	34.4	36.9333	2.96873		219500	23.1	41.3	37.3	33.9	9.56452		219500	40.7	35.2	35.2	37.0333	3.17543
	220000	34.4	27	27	29.4667	4.27239		220000	39.7	32.7	30.9	34.4333	4.64901		220000	19.4	24.8	24.8	23	3.11769		220000	35.1	34.8	34.8	34.9	0.173205
	220500	28.3	21.2	21.2	23.5667	4.09919		220500	40.5	36.6	36.6	37.9	2.25167		220500	22.6	27	27	25.5333	2.54034		220500	23.8	23.8	23.8	23.8	0
	221000	33.6	29.6	27.7	30.3	3.01164		221000	43.7	39.8	37.9	40.4667	2.95691		221000	17.9	31.2	29.4	26.1667	7.21549		221000	27.1	23.3	23.3	24.5667	2.19393
	221500	41.7	29.2	27.5	32.8	7.75435		221500	47.2	47.2	43.7	46.0333	2.02073		221500	22.8	28.5	28.5	26.6	3.2909		221500	28.2	26.8	26.8	27.2667	0.80829
	222000	32.1	28.2	28.2	29.5	2.25167		222000	34.7	34.7	32.8	34.0667	1.09697		222000	28.5	31.8	30.1	30.1333	1.65025		222000	26.5	20.7	20.7	22.6333	3.34863
	222500	44.1	38.5	38.5	40.3667	3.23316		222500	40.7	36.8	34.8	37.4333	3.00056		222500	14.8	22.3	22.3	19.8	4.33013		222500	33.6	27.9	26.1	29.2	3.91535
	223000	45.5	34.5	34.5	38.1667	6.35085		223000	32.3	32.3	26.6	30.4	3.2909		223000	32.6	22.5	22.5	25.8667	5.83124		223000	29	25.6	25.6	26.7333	1.96299
	223500	45.2	31.4	31.4	36	7.96743		223500	41.3	41.3	41.3	41.3	0		223500	27.5	29.9	28.2	28.5333	1.23423		223500	30.7	27	27	28.2333	2.1362
	224000	32.1	22.9	22.9	25.9667	5.31162		224000	37.9	37.9	30.3	35.3667	4.38786		224000	28.7	21.1	21.1	23.6333	4.38786		224000	25.1	21.6	21.6	22.7667	2.02073
	224500	34.4	25	25	28.1333	5.42709		224500	50.5	46.7	44.8	47.3333	2.9023		224500	26.8	31.1	29.4	29.1	2.16564		224500	38.8	36.9	36.9	37.5333	1.09697
	225000	29	24.6	24.6	26.0667	2.54034		225000	28.3	28.3	24.6	27.0667	2.1362		225000	26.6	28.1	28.1	27.6	0.866025		225000	25.2	25.2	25.2	25.2	0
	225500	39.5	31.9	30.1	33.8333	4.98932		225500	47.8	40.7	37	41.8333	5.48847		225500	33.1	20.1	20.1	24.4333	7.50555		225500	24.3	22.3	21.5	22.7	1.44222
	226000	42	31.6	31.6	35.0667	6.00444		226000	45	35.2	31.3	37.1667	7.05856		226000	23.6	35.7	35.7	31.6667	6.98594		226000	35.6	30.2	28.4	31.4	3.747
	226500	40.5	31	29.2	33.5667	6.07152		226500	38.9	29.6	25.9	31.4667	6.69801		226500	22.3	30.3	28.4	27	4.17971		226500	31.9	26.2	26.2	28.1	3.2909
	227000	32.9	23.1	23.1	26.3667	5.65803		227000	51.3	49.3	43.9	48.1667	3.82797		227000	24.9	28	26.2	26.3667	1.55671		227000	43.5	41.7	39.5	41.5667	2.00333
	227500	31	27.1	27.1	28.4	2.25167		227500	35.3	35.3	29.4	33.3333	3.40637		227500	29.1	37.3	33.6	33.3333	4.1065		227500	28.8	25.4	25.4	26.5333	1.96299
	228000	32.2	23.5	23.5	26.4	5.02295		228000	31.4	31.4	27.5	30.1	2.25167		228000	32.4	33.9	30.1	32.1333	1.91398		228000	23.6	18	18	19.8667	3.23316
	228500	47.6	37.7	37.7	41	5.71577		228500	36.8	36.8	36.8	36.8	0		228500	18.5	29.1	29.1	25.5667	6.11991		228500	26.7	21.7	21.7	23.3667	2.88675
	229000	45.9	38.5	38.5	40.9667	4.27239		229000	42.7	38.9	37.2	39.6	2.81603		229000	32.9	17.1	17.1	22.3667	9.12213		229000	32.5	30.5	30.5	31.1667	1.1547
	229500	37.6	28.7	28.7	31.6667	5.13842		229500	43.7	39.8	36.1	39.8667	3.80044		229500	17.3	36.1	34.2	29.2	10.3494		229500	31.9	30	30	30.6333	1.09697
	230000	37.7	30.1	30.1	32.6333	4.38786		230000	37.2	32.1	32.1	33.8	2.94449		230000	19.8	33.8	33.8	29.1333	8.0829		230000	31	28.6	28.6	29.4	1.38564
	230500	40.3	29.2	29.2	32.9	6.40859		230500	46.7	40.5	35.7	40.9667	5.51483		230500	28.2	30.5	30.5	29.7333	1.32791		230500	43.5	39.8	39.8	41.0333	2.1362
	231000	30.6	21.6	21.6	24.6	5.19615		231000	42.4	38.5	36.6	39.1667	2.95691		231000	23.3	26.2	26.2	25.2333	1.67432		231000	35.6	26.7	26.7	29.6667	5.13842
	231500	42.4	33.9	33.9	36.7333	4.90748		231500	43.3	41.3	39.4	41.3333	1.95021		231500	22.3	31.1	31.1	28.1667	5.08068		231500	19.6	14.2	12.6	15.4667	3.66788
	232000	44.1	31.5	31.5	35.7	7.27461		232000	39.1	33.2	31.3	34.5333	4.06735		232000	22.4	36.2	34.4	31	7.502		232000	26.5	18.9	17.5	20.9667	4.84286
	232500	35.6	28.1	26.2	29.9667	4.97024		232500	45.9	44.1	44.1	44.7	1.03923		232500	22.8	44.1	44.1	37	12.2976		232500	34	31.9	31.8	32.5667	1.24231
	233000	39.8	28.1	28.1	32	6.755		233000	42.6	42.6	42.6	42.6	0		233000	17	32.5	32.5	27.3333	8.94893		233000	34.2	34.2	32.4	33.6	1.03923
	233500	38.6	30	30	32.8667	4.96521		233500	39.1	36.1	36.1	37.1	1.73205		233500	13	27.2	27.2	22.4667	8.19837		233500	36	31.4	31.4	32.9333	2.65581
	234000	46.1	28.9	28.9	34.6333	9.93042		234000	35.7	32.2	28.6	32.1667	3.55012		234000	18.9	24.6	20.9	21.4667	2.89194		234000	31.3	27.7	25.8	28.2667	2.79344
	234500	40.8	30	30	33.6	6.23538		234500	42	39.2	35.5	38.9	3.26037		234500	19.7	31	31	27.2333	6.52406		234500	30.3	26.5	22.7	26.5	3.8
	235000	38.9	29.2	29.2	32.4333	5.6003		235000	44.2	40.5	40.5	41.7333	2.1362		235000	23.7	37.5	37.5	32.9	7.96743		235000	34.4	34.4	30.5	33.1	2.25167
	235500	40.5	29.9	29.9	33.4333	6.11991		235500	47.6	45.7	41.7	45	3.01164		235500	34.1	34.6	34.6	34.4333	0.288675		235500	37.3	31.4	29.4	32.7	4.10731
	236000	34.1	30.3	30.3	31.5667	2.19393		236000	30.4	28.5	25.7	28.2	2.36432		236000	29.6	26.6	26.6	27.6	1.73205		236000	34.6	29.1	29.1	30.9333	3.17543
	236500	38.2	25.4	23.6	29.0667	7.96074		236500	45	41.7	39.8	42.1667	2.63122		236500	15.7	21.6	21.6	19.6333	3.40637		236500	30.9	29	27	28.9667	1.95021
	237000	33.4	29.7	29.7	30.9333	2.1362		237000	39.5	37.6	35.7	37.6	1.9		237000	36.2	34.8	33	34.6667	1.60416		237000	37	37	37	37	0
	237500	36.1	30.4	30.4	32.3	3.2909		237500	48.1	38.9	35.2	40.7333	6.64254		237500	27.2	24.6	24.6	25.4667	1.50111		237500	36.2	29.9	29.9	32	3.63731
	238000	41.2	34.8	34.8	36.9333	3.69504		238000	40.7	40.7	32.2	37.8667	4.90748		238000	27.9	35.2	35.2	32.7667	4.21466		238000	31.2	28.4	28.4	29.3333	1.61658
	238500	35.3	27.9	24.2	29.1333	5.65184		238500	52.6	52.6	46.9	50.7	3.2909		238500	21.4	33.4	31.5	28.7667	6.45006		238500	31.4	23.1	23.1	25.8667	4.79201
	239000	38.5	28.4	26.5	31.1333	6.45006		239000	45.9	42.2	38.3	42.1333	3.80044		239000	24.8	36.6	35.1	32.1667	6.42365		239000	32.8	29.2	27.3	29.7667	2.79344
	239500	46.9	33.8	33.8	38.1667	7.56329		239500	39.4	37.6	34.2	37.0667	2.64071		239500	10.4	29.5	27.6	22.5	10.5219		239500	35.6	27	25.5	29.3667	5.45008
	240000	42.7	28.2	28.2	33.0333	8.37158		240000	37.7	32.1	28.2	32.6667	4.77528		240000	19.2	33.9	33.9	29	8.48705		240000	32.3	30.3	30.3	30.9667	1.1547
	240500	38.6	23.4	23.4	28.4667	8.77572		240500	38.3	32.6	32.6	34.5	3.2909		240500	31.8	31.6	31.6	31.6667	0.11547		240500	29.4	25.7	24.4	26.5	2.59422
	241000	31.5	27.8	27.8	29.0333	2.1362		241000	46.3	40.3	34.8	40.4667	5.75181		241000	23.4	21.6	21.6	22.2	1.03923		241000	36.5	25.1	23.5	28.3667	7.08896
	241500	25.8	21.7	21.7	23.0667	2.36714		241500	45.2	43.3	43.3	43.9333	1.09697		241500	22.9	29.6	29.6	27.3667	3.86825		241500	31	25.4	25.4	27.2667	3.23316
	242000	43.1	26.2	22.7	30.6667	10.9089		242000	28.5	26.9	24.9	26.7667	1.8037		242000	35.1	25.8	24	28.3	5.95735		242000	33.8	31.8	31.8	32.4667	1.1547
	242500	32.2	26.5	24.6	27.7667	3.95517		242500	34.7	32.9	29.2	32.2667	2.80416		242500	26.9	33.8	31.7	30.8	3.53695		242500	29.6	29.6	29.6	29.6	4.35117e-15
	243000	34.7	29.2	29.2	31.0333	3.17543		243000	43.1	37.2	35.2	38.5	4.10731		243000	26.5	42.7	42.7	37.3	9.35307		243000	39.2	37.3	37.3	37.9333	1.09697
	243500	46.3	34.7	34.7	38.5667	6.69726		243500	49.8	42.4	42.4	44.8667	4.27239		243500	16.9	31.1	29.1	25.7	7.68635		243500	28.2	28.2	28.2	28.2	0
	244000	39.4	27.5	27.5	31.4667	6.87047		244000	33.4	33.4	27.9	31.5667	3.17543		244000	18.6	33.3	31.4	27.7667	7.99521		244000	34.4	32.6	32.6	33.2	1.03923
	244500	45.5	30.3	30.3	35.3667	8.77572		244500	53.2	49.5	47.6	50.1	2.84781		244500	22.2	30.2	28.6	27	4.2332		244500	38.6	32.8	32.8	34.7333	3.34863
	245000	31.6	28	28	29.2	2.07846		245000	39.2	33.8	32.1	35.0333	3.7072		245000	24.2	38.2	38.2	33.5333	8.0829		245000	35.5	31.5	31.5	32.8333	2.3094
	245500	42.6	24	22.2	29.6	11.2942		245500	31.9	30.2	28.4	30.1667	1.75024		245500	18.3	33	33	28.1	8.48705		245500	34.7	32.9	32.9	33.5	1.03923
	246000	38.5	27.6	27.6	31.2333	6.29312		246000	32.3	30.5	28.7	30.5	1.8		246000	24.4	30.9	30.9	28.7333	3.75278		246000	27.6	23.9	23.9	25.1333	2.1362
	246500	39.7	30.2	30.2	33.3667	5.48483		246500	40.2	35	31.8	35.6667	4.2395		246500	23.6	27.2	25.4	25.4	1.8		246500	27.6	25.8	25.8	26.4	1.03923
	247000	42	33.9	33.9	36.6	4.67654		247000	39.2	37.3	33.6	36.7	2.84781		247000	27.9	31.3	31.3	30.1667	1.96299		247000	20.2	20.2	18.4	19.6	1.03923
	247500	47.6	28.5	28.5	34.8667	11.0274		247500	39.5	37.7	37.7	38.3	1.03923		247500	23.3	25.9	25.9	25.0333	1.50111		247500	32.2	32.2	30.3	31.5667	1.09697
	248000	28.3	24.6	22.7	25.2	2.84781		248000	50	48.1	44.2	47.4333	2.95691		248000	26.4	30.2	30.2	28.9333	2.19393		248000	32.7	32.7	30.3	31.9	1.38564
	248500	46.1	37.3	34.7	39.3667	5.97439		248500	42.9	38.9	35	38.9333	3.95011		248500	27.2	38.6	33.1	32.9667	5.70117		248500	30.6	27	25.1	27.5667	2.79344
	249000	41.5	30.2	30.2	33.9667	6.52406		249000	40	30.6	28.9	33.1667	5.97857		249000	23.5	26.3	24.4	24.7333	1.42945		249000	30.8	22.6	22.6	25.3333	4.73427
	249500	37.9	32.8	32.8	34.5	2.94449		249500	34	27.9	25.3	29.0667	4.4658		249500	21.6	31.8	29.3	27.5667	5.31633		249500	31.8	28.1	28.1	29.3333	2.1362
	250000	31.7	29.9	29.9	30.5	1.03923		250000	57.1	47.6	43.9	49.5333	6.80906		250000	22	29.7	29.7	27.1333	4.4456		250000	31.2	29.3	27.5	29.3333	1.85023
	250500	42.6	32.9	32.9	36.1333	5.6003		250500	42.6	38.9	35.2	38.9	3.7		250500	26.6	38.6	38.6	34.6	6.9282		250500	32.6	30.9	30.9	31.4667	0.981495
	251000	37.7	28.7	28.7	31.7	5.19615		251000	32.8	30.9	30.9	31.5333	1.09697		251000	17.2	36	34.2	29.1333	10.3737		251000	32.5	28.7	28.7	29.9667	2.19393
	251500	37.6	29.5	29.5	32.2	4.67654		251500	45	43.3	39.5	42.6	2.81603		251500	19.9	34	34	29.3	8.14064		251500	29.5	25.8	24	26.4333	2.80416
	252000	38.8	27.4	27.4	31.2	6.58179		252000	44.2	44.2	42.4	43.6	1.03923		252000	14.7	30.2	30.2	25.0333	8.94893		252000	33.2	29.5	29.5	30.7333	2.1362
	252500	43.9	32.9	32.9	36.5667	6.35085		252500	51.5	47.6	43.9	47.6667	3.80044		252500	38.8	33.2	33.2	35.0667	3.23316		252500	28.9	28	26.1	27.6667	1.42945
	253000	41.5	33.6	33.6	36.2333	4.56107		253000	43.3	41.3	37.6	40.7333	2.89194		253000	19.5	35.1	35.1	29.9	9.00666		253000	32.1	24.9	23.1	26.7	4.76235
	253500	33.2	29.2	29.2	30.5333	2.3094		253500	31.7	31.7	29.9	31.1	1.03923		253500	36.6	38.9	35.2	36.9	1.86815		253500	26.1	22.4	22.4	23.6333	2.1362
	254000	43.3	30	30	34.4333	7.67876		254000	35.2	35.2	33.3	34.5667	1.09697		254000	27.8	31.6	27.9	29.1	2.16564		254000	32.9	31.1	31.1	31.7	1.03923
	254500	47.8	38.5	38.5	41.6	5.36936		254500	30.7	28.8	28.8	29.4333	1.09697		254500	25.9	35.6	33.6	31.7	5.12152		254500	38	36.2	34.5	36.2333	1.75024
	255000	38	28.6	26.7	31.1	6.05062		255000	35.5	33.6	33.6	34.2333	1.09697		255000	32.3	31.8	31.8	31.9667	0.288675		255000	31.1	31.1	31.1	31.1	4.35117e-15
	255500	37.7	28.6	28.6	31.6333	5.25389		255500	45.2	39.5	35.7	40.1333	4.78156		255500	29.1	32.1	32.1	31.1	1.73205		255500	42.7	35.3	35.3	37.7667	4.27239
	256000	35	22.8	22.8	26.8667	7.04367		256000	30.2	28.2	26.7	28.3667	1.75594		256000	27.4	30.9	30.9	29.7333	2.02073		256000	40.5	38.6	38.6	39.2333	1.09697
	256500	41.3	26	26	31.1	8.83346		256500	35.5	33.7	29.9	33.0333	2.8589		256500	21.9	42.9	41	35.2667	11.6148		256500	39.8	35.8	33.9	36.5	3.01164
	257000	38.2	26.7	26.7	30.5333	6.63953		257000	41.3	36	34.2	37.1667	3.69098		257000	15.6	28.1	28.1	23.9333	7.21688		257000	32.7	32.7	30.8	32.0667	1.09697
	257500	42.7	22	22	28.9	11.9512		257500	33.1	33.1	29.9	32.0333	1.84752		257500	15.1	20.4	20.4	18.6333	3.05996		257500	29.6	25.9	25.9	27.1333	2.1362
	258000	43.1	32.6	32.6	36.1	6.06218		258000	46.7	40.8	39.5	42.3333	3.8371		258000	28.2	20.9	20.9	23.3333	4.21466		258000	33.1	29.2	29.2	30.5	2.25167
	258500	44.6	25.8	24	31.4667	11.4094		258500	34.6	34.6	32.7	33.9667	1.09697		258500	17.3	19.5	19.5	18.7667	1.27017		258500	41.2	37.3	37.3	38.6	2.25167
	259000	39.1	31.3	31.3	33.9	4.50333		259000	42	38.2	30.8	37	5.69561		259000	17.2	28.2	26.3	23.9	5.87963		259000	21.3	18	18	19.1	1.90526
	259500	33.8	24.4	24.4	27.5333	5.42709		259500	40	36.4	31.3	35.9	4.3715		259500	19.9	36.9	35.1	30.6333	9.33881		259500	27.1	21.3	21.3	23.2333	3.34863
	260000	31.8	26.8	26.8	28.4667	2.88675		260000	38	38	36.1	37.3667	1.09697		260000	26.3	32.3	28.5	29.0333	3.03535		260000	37.5	35.6	35.6	36.2333	1.09697
	260500	38.9	33.6	33.6	35.3667	3.05996		260500	50.5	46.7	46.7	47.9667	2.19393		260500	30.1	33	33	32.0333	1.67432		260500	33.6	33.6	33.6	33.6	0
	261000	41.5	24.5	24.5	30.1667	9.81495		261000	38.6	38.6	36.8	38	1.03923		261000	21.6	29.9	28	26.5	4.34856		261000	30.9	27.2	27.2	28.4333	2.1362
	261500	35.2	27.5	27.5	30.0667	4.4456		261500	43.7	43.7	38.6	42	2.94449		261500	26.2	33.7	33.7	31.2	4.33013		261500	33.3	28.3	26.7	29.4333	3.44287
	262000	45.9	38.5	36.6	40.3333	4.91359		262000	36.4	36.4	29.2	34	4.15692		262000	24.7	34	34	30.9	5.36936		262000	30.3	30.3	30.3	30.3	0
	262500	41.2	31.3	31.3	34.6	5.71577		262500	43.5	39.7	39.7	40.9667	2.19393		262500	31.8	29.4	29.4	30.2	1.38564		262500	36.4	30.9	30.9	32.7333	3.17543
	263000	42.9	31.1	31.1	35.0333	6.81273		263000	38.3	36.5	32.8	35.8667	2.80416		263000	19.6	20.8	20.8	20.4	0.69282		263000	41.8	36.6	36.6	38.3333	3.00222
	263500	44.6	37	37	39.5333	4.38786		263500	40.5	37.5	35.7	37.9	2.42487		263500	20.6	41.5	39.8	33.9667	11.607		263500	35.5	29.9	29.9	31.7667	3.23316
	264000	42	20	20	27.3333	12.7017		264000	40.5	40.5	35	38.6667	3.17543		264000	16.4	29.4	29.4	25.0667	7.50555		264000	41	35.1	35.1	37.0667	3.40637
	264500	38.9	29.8	29.8	32.8333	5.25389		264500	41.3	41.3	41.3	41.3	0		264500	19.5	26.7	25.1	23.7667	3.78065		264500	32.4	27	23.3	27.5667	4.57639
	265000	35.3	31.9	31.9	33.0333	1.96299		265000	32.1	28.3	25.3	28.5667	3.40783		265000	26.9	36.1	36.1	33.0333	5.31162		265000	30.4	26.6	26.6	27.8667	2.19393
	265500	35	29.4	29.4	31.2667	3.23316		265500	43.1	43.1	40.3	42.1667	1.61658		265500	23.1	34.2	34.2	30.5	6.40859		265500	36.4	34.5	34.5	35.1333	1.09697
	266000	38.9	28	28	31.6333	6.29312		266000	53.8	49.8	45.9	49.8333	3.95011		266000	27.5	35.3	33.4	32.0667	4.06735		266000	37.6	33.9	32.2	34.5667	2.76104
	266500	35.1	28.7	26.8	30.2	4.34856		266500	41.3	37.5	37.5	38.7667	2.19393		266500	28.4	40.2	40.2	36.2667	6.81273		266500	32.3	26.6	26.6	28.5	3.2909
	267000	35.8	32.1	32.1	33.3333	2.1362		267000	41.2	39.2	35.2	38.5333	3.05505		267000	23.1	28.3	28.3	26.5667	3.00222		267000	40	36.4	36.4	37.6	2.07846
	267500	48.3	37.5	33.8	39.8667	7.53414		267500	41	41	33.2	38.4	4.50333		267500	17.2	31.4	29.6	26.0667	7.73132		267500	36.5	32.5	32.5	33.8333	2.3094
	268000	35.2	27.4	25.4	29.3333	5.17816		268000	32.3	32.3	26.5	30.3667	3.34863		268000	11	33.8	33.8	26.2	13.1636		268000	26.7	26	26	26.2333	0.404145
	268500	44.8	29.9	29.9	34.8667	8.60252		268500	49	45	39.2	44.4	4.92747		268500	20.3	29.6	29.6	26.5	5.36936		268500	21.5	19.8	19.8	20.3667	0.981495
	269000	47.4	33.6	33.6	38.2	7.96743		269000	40.7	34.8	34.8	36.7667	3.40637		269000	16.8	36.5	32.2	28.5	10.3581		269000	25.6	23.9	23.9	24.4667	0.981495
	269500	42.7	35.2	35.2	37.7	4.33013		269500	38.9	37	35.7	37.2	1.60935		269500	29.5	33.2	29.5	30.7333	2.1362		269500	38.8	35.1	35.1	36.3333	2.1362
	270000	30.8	27	27	28.2667	2.19393		270000	32.6	32.6	30.8	32	1.03923		270000	17.1	31.3	31.3	26.5667	8.19837		270000	25.6	22	22	23.2	2.07846
	270500	42.4	31.3	31.3	35	6.40859		270500	42.9	39.1	35.3	39.1	3.8		270500	21.6	26.6	26.6	24.9333	2.88675		270500	33.8	33.8	33.8	33.8	0
	271000	40.5	33.1	33.1	35.5667	4.27239		271000	48.1	46.1	42.2	45.4667	3.00056		271000	27.1	30.7	28.7	28.8333	1.8037		271000	33	33	33	33	0
	271500	40	29.1	29.1	32.7333	6.29312		271500	45.7	43.7	41.7	43.7	2		271500	29.5	31.3	28.8	29.8667	1.2897		271500	36	32.7	32.7	33.8	1.90526
	272000	35.7	23.8	23.8	27.7667	6.87047		272000	49.8	46.3	44.4	46.8333	2.73922		272000	24.9	31.5	28	28.1333	3.30202		272000	29.2	27.5	27.5	28.0667	0.981495
	272500	31	25.6	25.6	27.4	3.11769		272500	41.3	39.5	39.5	40.1	1.03923		272500	19.3	30.1	30.1	26.5	6.23538		272500	24	19.5	19.5	21	2.59808
	273000	37.2	29.3	29.3	31.9333	4.56107		273000	40.7	38.9	38.9	39.5	1.03923		273000	17.2	33.3	31.5	27.3333	8.82175		273000	26.2	20.5	20.5	22.4	3.2909
	273500	40.8	29.2	29.2	33.0667	6.69726		273500	39.1	37.2	33.2	36.5	3.01164		273500	15	34.7	32.9	27.5333	10.8914		273500	32.3	32.3	30.3	31.6333	1.1547
	274000	55.6	34.6	34.6	41.6	12.1244		274000	35.6	33.9	31.9	33.8	1.85203		274000	21.3	41.2	39.2	33.9	10.9576		274000	38.3	34.8	34.8	35.9667	2.02073
	274500	40.3	25.6	25.6	30.5	8.48705		274500	39.7	36.2	32.8	36.2333	3.45012		274500	10.5	21.7	21.7	17.9667	6.46632		274500	30.6	28.7	28.7	29.3333	1.09697
	275000	36.5	25	25	28.8333	6.63953		275000	38.5	32.7	30.8	34	4.01123		275000	27	22.2	22.2	23.8	2.77128		275000	31.3	29.5	29.5	30.1	1.03923
	275500	33	26	26	28.3333	4.04145		275500	51.3	49.3	49.3	49.9667	1.1547		275500	19.2	27.2	27.2	24.5333	4.6188		275500	28.2	28.2	28.2	28.2	0
	276000	45.5	29.8	28	34.4333	9.62618		276000	27	27	22.6	25.5333	2.54034		276000	15.6	27	27	23.2	6.58179		276000	31.3	26.3	26.3	27.9667	2.88675
	276500	37.9	32.5	32.5	34.3	3.11769		276500	44.4	42.6	37	41.3333	3.85919		276500	19.8	33.9	33.9	29.2	8.14064		276500	27.7	27.5	27.5	27.5667	0.11547
	277000	39.2	35.3	35.3	36.6	2.25167		277000	49.5	47.6	42.7	46.6	3.50856		277000	15.3	29.9	29.9	25.0333	8.42931		277000	35.7	25.4	25.4	28.8333	5.94671
	277500	40.8	31.5	31.5	34.6	5.36936		277500	46.5	46.5	38.8	43.9333	4.4456		277500	21.3	28.9	27.1	25.7667	3.97157		277500	25.5	22.1	22.1	23.2333	1.96299
	278000	48.8	37.2	37.2	41.0667	6.69726		278000	37.6	37.6	35.7	36.9667	1.09697		278000	13.9	21.6	21.2	18.9	4.33474		278000	24.9	20.1	18.4	21.1333	3.37095
	278500	48.8	29.5	29.5	35.9333	11.1429		278500	43.1	41	41	41.7	1.21244		278500	21.1	29.7	26	25.6	4.31393		278500	41	31.6	29	33.8667	6.31295
	279000	41	35.3	35.3	37.2	3.2909		279000	45.7	33.9	33.9	37.8333	6.81273		279000	26.3	30.1	30.1	28.8333	2.19393		279000	29.6	27.5	27.5	28.2	1.21244
	279500	42.2	28.7	28.7	33.2	7.79423		279500	42	42	38.2	40.7333	2.19393		279500	11.9	34.7	30.9	25.8333	12.2153		279500	36.5	32.6	30.7	33.2667	2.95691
	280000	40.2	26.3	26.3	30.9333	8.02517		280000	40.8	40.8	40.8	40.8	0		280000	17.3	38.6	38.6	31.5	12.2976		280000	27	22.2	20.6	23.2667	3.33067
	280500	40.7	28.7	28.7	32.7	6.9282		280500	38.8	34.8	31.3	34.9667	3.75278		280500	24.8	30.5	30.5	28.6	3.2909		280500	22.3	21.3	21.3	21.6333	0.57735
	281000	45.2	30.4	30.4	35.3333	8.54478		281000	48.1	40.5	36.6	41.7333	5.84836		281000	23.5	27.7	27.7	26.3	2.42487		281000	39.1	33.1	33.1	35.1	3.4641
	281500	38.8	31.1	31.1	33.6667	4.4456		281500	36	34.1	34.1	34.7333	1.09697		281500	21.4	27.4	27.4	25.4	3.4641		281500	32.9	32.9	32.9	32.9	0
	282000	34	24.3	24.3	27.5333	5.6003		282000	39.5	37.7	37.7	38.3	1.03923		282000	25.7	34.2	34.2	31.3667	4.90748		282000	27.3	24.5	24.5	25.4333	1.61658
	282500	41.2	30.8	30.8	34.2667	6.00444		282500	35.2	35.2	35.2	35.2	0		282500	27.2	32.5	32.5	30.7333	3.05996		282500	33.1	29.2	29.2	30.5	2.25167
	283000	42	28.7	28.7	33.1333	7.67876		283000	42.4	35.2	33.4	37	4.76235		283000	22.8	32.1	32.1	29	5.36936		283000	38.5	36.5	36.5	37.1667	1.1547
	283500	41.8	26.4	26.4	31.5333	8.89119		283500	41.5	39.7	37.9	39.7	1.8		283500	18.4	30.7	30.7	26.6	7.10141		283500	28.1	26.2	26.2	26.8333	1.09697
	284000	35	22.4	22.4	26.6	7.27461		284000	39.1	34.5	31.1	34.9	4.01497		284000	28.1	42.4	40.5	37	7.76595		284000	25.8	25.8	25.8	25.8	0
	284500	40.5	29.8	29.8	33.3667	6.17765		284500	44.6	39.1	37.2	40.3	3.84318		284500	39.4	30.5	30.5	33.4667	5.13842		284500	34.5	30.7	30.7	31.9667	2.19393
	285000	41.8	34.1	34.1	36.6667	4.4456		285000	35.8	34	28.4	32.7333	3.85919		285000	27.2	26.5	26.5	26.7333	0.404145		285000	42.2	36.5	36.5	38.4	3.2909
	285500	35.5	29.9	29.9	31.7667	3.23316		285500	35.7	35.7	28.2	33.2	4.33013		285500	22.1	29.2	27.5	26.2667	3.7072		285500	33.3	31.3	31.3	31.9667	1.1547
	286000	38.5	32.2	32.2	34.3	3.63731		286000	37.7	29.1	29.1	31.9667	4.96521		286000	31.8	23	23	25.9333	5.08068		286000	32.2	30.4	30.4	31	1.03923
	286500	48.5	36.8	36.8	40.7	6.755		286500	35	27.8	26	29.6	4.76235		286500	27.1	25.1	23.4	25.2	1.85203		286500	33.2	31.4	29.6	31.4	1.8
	287000	40.3	31.5	31.5	34.4333	5.08068		287000	50.5	48.5	48.5	49.1667	1.1547		287000	24.8	28.7	28.7	27.4	2.25167		287000	38	34.2	34.2	35.4667	2.19393
	287500	39.1	30.3	30.3	33.2333	5.08068		287500	36.9	36.9	35.2	36.3333	0.981495		287500	30.4	33.8	31.9	32.0333	1.70392		287500	28.9	27.1	21.7	25.9	3.747
	288000	47.4	32.2	32.2	37.2667	8.77572		288000	35.7	30.4	26.8	30.9667	4.47698		288000	24.9	34.7	34.7	31.4333	5.65803		288000	21	21	19.4	20.4667	0.92376
	288500	36.9	27.6	27.6	30.7	5.36936		288500	40.7	38.6	34.7	38	3.04467		288500	17.7	35.7	35.7	29.7	10.3923		288500	37	33.6	31.7	34.1	2.68514
	289000	41.5	33.9	33.9	36.4333	4.38786		289000	33.6	33.6	28.7	31.9667	2.82902		289000	26.3	25.1	25.1	25.5	0.69282		289000	39.5	37.6	37.6	38.2333	1.09697
	289500	39.8	30.2	28.3	32.7667	6.16468		289500	41.5	39.5	37.7	39.5667	1.90088		289500	28.7	42.6	42.6	37.9667	8.02517		289500	37.3	35.5	35.5	36.1	1.03923
	290000	44.1	34.8	34.8	37.9	5.36936		290000	38.9	35.1	33.1	35.7	2.94618		290000	31.8	40	40	37.2667	4.73427		290000	31.3	26.6	26.6	28.1667	2.71355
	290500	42.7	31.5	31.5	35.2333	6.46632		290500	47.2	39.4	32.6	39.7333	7.30571		290500	27.8	33.9	33.9	31.8667	3.52184		290500	29.4	24.2	22.5	25.3667	3.5949
	291000	40.8	27.8	27.8	32.1333	7.50555		291000	38.6	32.8	27	32.8	5.8		291000	20.9	27.5	24.1	24.1667	3.30051		291000	41.8	38.6	36.8	39.0667	2.53246
	291500	35.8	23.3	23.3	27.4667	7.21688		291500	33.1	31.3	29.7	31.3667	1.70098		291500	24.8	33.9	33.9	30.8667	5.25389		291500	31.7	28	28	29.2333	2.1362
	292000	37	27.5	25.8	30.1	6.03573		292000	43.5	43.5	40.3	42.4333	1.84752		292000	12.3	38	36.4	28.9	14.3983		292000	44.2	34.6	34.6	37.8	5.54256
	292500	44.6	31.1	31.1	35.6	7.79423		292500	33.9	32.2	25	30.3667	4.72476		292500	14.2	20.4	20.4	18.3333	3.57957		292500	33.6	30.2	30.2	31.3333	1.96299
	293000	39.1	30.5	30.5	33.3667	4.96521		293000	41.7	37.9	32.2	37.2667	4.78156		293000	30.5	29.9	29.9	30.1	0.34641		293000	39.5	35.8	35.8	37.0333	2.1362
	293500	34.5	22.9	22.9	26.7667	6.69726		293500	44.6	37.5	35.7	39.2667	4.70567		293500	22.5	35.5	35.5	31.1667	7.50555		293500	40.2	34.4	34.4	36.3333	3.34863
	294000	32.8	27	27	28.9333	3.34863		294000	35.5	35.5	35.5	35.5	0		294000	20.4	32.6	32.6	28.5333	7.04367		294000	31.1	29.1	29.1	29.7667	1.1547
	294500	32.9	22.8	22.8	26.1667	5.83124		294500	31.3	31.3	29.4	30.6667	1.09697		294500	28.2	26.6	24.8	26.5333	1.70098		294500	36.9	35	33.1	35	1.9
	295000	46.5	28.8	28.8	34.7	10.2191		295000	44.4	39.1	39.1	40.8667	3.05996		295000	12.6	35.3	35.3	27.7333	13.1059		295000	33.6	27.6	27.6	29.6	3.4641
	295500	46.3	34.7	34.7	38.5667	6.69726		295500	28.8	28.8	28.8	28.8	0		295500	26.7	26.1	22.4	25.0667	2.32881		295500	36.9	35	31.1	34.3333	2.95691
	296000	36.2	30.5	30.5	32.4	3.2909		296000	41.2	38.9	36.9	39	2.15174		296000	22.3	36.4	36.4	31.7	8.14064		296000	39.2	35.5	35.5	36.7333	2.1362
	296500	45	35.2	35.2	38.4667	5.65803		296500	35.6	33.6	33.6	34.2667	1.1547		296500	25.2	35.7	34	31.6333	5.6359		296500	29.5	27.7	27.7	28.3	1.03923
	297000	38.5	28.4	28.4	31.7667	5.83124		297000	46.3	42.4	40.5	43.0667	2.95691		297000	26.6	31.4	29.5	29.1667	2.4173		297000	29.1	29.1	27.2	28.4667	1.09697
	297500	38.5	27.4	25.6	30.5	6.98642		297500	40	36.2	36.2	37.4667	2.19393		297500	23.4	33.4	33.4	30.0667	5.7735		297500	37.5	33.8	33.8	35.0333	2.1362
	298000	36.9	25.3	25.3	29.1667	6.69726		298000	36.6	32.6	31	33.4	2.88444		298000	29	23.9	23.9	25.6	2.94449		298000	23.8	23.8	23.8	23.8	0
	298500	44.2	33.3	33.3	36.9333	6.29312		298500	45.9	45.9	43.9	45.2333	1.1547		298500	27.1	33.3	33.3	31.2333	3.57957		298500	28.2	28.2	22.9	26.4333	3.05996
	299000	47.8	42.2	40.2	43.4	3.93954		299000	37.7	36	34.2	35.9667	1.75024		299000	24.8	23.5	23.5	23.9333	0.750555		299000	36.4	36.4	35.2	36	0.69282
	299500	39.5	35.6	35.6	36.9	2.25167		299500	34.2	28.9	25.3	29.4667	4.47698		299500	30.1	30.9	29.2	30.0667	0.85049		299500	37.3	33.3	33.3	34.6333	2.3094
	300000	40.5	32.7	32.7	35.3	4.50333		300000	41	41	41	41	0		300000	24	34.1	34.1	30.7333	5.83124		300000	29.9	26.4	24.6	26.9667	2.69506
	300500	34.7	31.1	31.1	32.3	2.07846		300500	40.2	34.7	34.7	36.5333	3.17543		300500	23.2	21.1	21.1	21.8	1.21244		300500	34	28.4	28.4	30.2667	3.23316
	301000	51	39.2	39.2	43.1333	6.81273		301000	33.7	29.7	27.7	30.3667	3.05505		301000	19.7	30	30	26.5667	5.94671		301000	28.5	27.2	27.2	27.6333	0.750555
	301500	39.1	31.7	31.7	34.1667	4.27239		301500	33.6	31.1	29.2	31.3	2.20681		301500	24.8	26.8	26.8	26.1333	1.1547		301500	28.3	26.4	26.4	27.0333	1.09697
	302000	45.7	27.1	27.1	33.3	10.7387		302000	32.6	32.6	32.6	32.6	0		302000	20.2	29.8	29.8	26.6	5.54256		302000	33.3	27.4	25.4	28.7	4.10731
	302500	39.5	27.6	27.6	31.5667	6.87047		302500	41.5	37.7	32.1	37.1	4.72864		302500	27	25.6	25.6	26.0667	0.80829		302500	32.9	32.2	32.2	32.4333	0.404145
	303000	36.6	31.3	31.3	33.0667	3.05996		303000	40.7	34.8	34.8	36.7667	3.40637		303000	12.4	31.4	29.6	24.4667	10.4887		303000	43.5	41.7	41.7	42.3	1.03923
	303500	49.3	36	36	40.4333	7.67876		303500	45.5	45.5	43.7	44.9	1.03923		303500	32.2	39.7	39.7	37.2	4.33013		303500	29.2	29.2	29.2	29.2	0
	304000	36.2	28.6	28.6	31.1333	4.38786		304000	41.8	36.5	36.5	38.2667	3.05996		304000	20.3	29.8	29.8	26.6333	5.48483		304000	35.3	31.3	29.4	32	3.01164
	304500	41.5	34.4	34.4	36.7667	4.09919		304500	33.3	31.3	27.5	30.7	2.94618		304500	27	25.7	25.7	26.1333	0.750555		304500	43.3	41.5	41.5	42.1	1.03923
	305000	33.2	23.9	23.9	27	5.36936		305000	36.2	32.6	30.8	33.2	2.74955		305000	12.8	39.1	37	29.6333	14.6159		305000	24.9	23.1	23.1	23.7	1.03923
	305500	32.7	27	27	28.9	3.2909		305500	39.2	39.2	37.5	38.6333	0.981495		305500	24.9	34.1	32.2	30.4	4.85695		305500	34.2	30.4	30.4	31.6667	2.19393
	306000	44.6	37.2	35.2	39	4.95177		306000	48.5	44.6	44.6	45.9	2.25167		306000	35.8	31.9	31.9	33.2	2.25167		306000	35.2	35.2	33.3	34.5667	1.09697
	306500	43.1	30.5	30.5	34.7	7.27461		306500	44.6	36.4	36.4	39.1333	4.73427		306500	31.3	30	30	30.4333	0.750555		306500	37.6	37.6	37.6	37.6	0
	307000	34.5	29.2	29.2	30.9667	3.05996		307000	43.1	39.1	37.2	39.8	3.01164		307000	22.5	28.7	26.8	26	3.17648		307000	24.4	24.4	20.7	23.1667	2.1362
	307500	37.6	23.9	22.2	27.9	8.44334		307500	52.1	48.1	46.3	48.8333	2.96873		307500	24.2	33.1	33.1	30.1333	5.13842		307500	28.5	25.5	25.5	26.5	1.73205
	308000	45.7	28.6	28.6	34.3	9.87269		308000	46.5	42.7	41	43.4	2.81603		308000	23.8	35.6	33.6	31	6.31506		308000	30.8	25.3	25.3	27.1333	3.17543
	308500	40.7	36.8	36.8	38.1	2.25167		308500	36.4	32.7	30.9	33.3333	2.80416		308500	11.7	28.4	28.4	22.8333	9.64175		308500	33.9	26.7	26.7	29.1	4.15692
	309000	37.7	33.8	33.8	35.1	2.25167		309000	37	37	37	37	0		309000	24.2	26.6	26.6	25.8	1.38564		309000	31.1	25.9	25.9	27.6333	3.00222
	309500	36.4	22.9	22.9	27.4	7.79423		309500	42.6	37.3	37.3	39.0667	3.05996		309500	12.2	23.4	23.4	19.6667	6.46632		309500	24.9	23.1	23.1	23.7	1.03923
	310000	37	26.2	26.2	29.8	6.23538		310000	40.2	40.2	38.2	39.5333	1.1547		310000	15.4	31.4	31.4	26.0667	9.2376		310000	28.4	20	20	22.8	4.84974
	310500	37	26	26	29.6667	6.35085		310500	44.2	44.2	42.2	43.5333	1.1547		310500	25.3	26.5	26.5	26.1	0.69282		310500	32.7	28.5	28.5	29.9	2.42487
	311000	35.1	28.2	28.2	30.5	3.98372		311000	43.1	41.2	41.2	41.8333	1.09697		311000	28.8	27.3	27.3	27.8	0.866025		311000	35.3	28.2	28.2	30.5667	4.09919
	311500	46.3	35	35	38.7667	6.52406		311500	37	33.2	29.2	33.1333	3.90043		311500	20.2	34.6	30.8	28.5333	7.4628		311500	31.3	25.4	25.4	27.3667	3.40637
	312000	34.1	28.4	28.4	30.3	3.2909		312000	38.5	38.5	36.6	37.8667	1.09697		312000	18.4	36.9	35.1	30.1333	10.2011		312000	32.7	32.7	32.7	32.7	0
	312500	50.8	33.1	33.1	39	10.2191		312500	39.2	32.1	32.1	34.4667	4.09919		312500	22.7	31.3	31.2	28.4	4.9366		312500	24.9	21.4	21.4	22.5667	2.02073
	313000	39.4	29.9	29.9	33.0667	5.48483		313000	36.8	31.2	31.2	33.0667	3.23316		313000	23.7	27.2	27.2	26.0333	2.02073		313000	38.5	30.8	30.8	33.3667	4.4456
	313500	45.7	36.5	36.5	39.5667	5.31162		313500	39.1	37.2	37.2	37.8333	1.09697		313500	23.1	27.4	25.4	25.3	2.15174		313500	29.4	26.5	26.5	27.4667	1.67432
	314000	37.9	33.9	33.9	35.2333	2.3094		314000	48.1	44.2	42.4	44.9	2.91376		314000	16.6	20.7	20.7	19.3333	2.36714		314000	24.9	19.3	19.3	21.1667	3.23316
	314500	49	33.9	33.9	38.9333	8.71799		314500	41.3	35.7	30.1	35.7	5.6		314500	33.2	21.1	19.6	24.6333	7.45676		314500	33.8	31.4	31.4	32.2	1.38564
	315000	38.6	31.3	31.3	33.7333	4.21466		315000	32.3	32.3	29.7	31.4333	1.50111		315000	17.5	24.4	24.4	22.1	3.98372		315000	34.6	32.8	32.8	33.4	1.03923
	315500	55.6	46.1	46.1	49.2667	5.48483		315500	54.6	54.6	54.6	54.6	0		315500	15.6	40.2	40.2	32	14.2028		315500	21.1	18.7	18.7	19.5	1.38564
	316000	53.8	45.9	45.9	48.5333	4.56107		316000	42.2	38.3	38.3	39.6	2.25167		316000	21.6	37.6	35.6	31.6	8.7178		316000	27.3	18.6	17.9	21.2667	5.23673
	316500	44.6	39.2	37.3	40.3667	3.78726		316500	42.9	41	37	40.3	3.01164		316500	31.2	33.9	31.8	32.3	1.41774		316500	41.5	30.6	28.8	33.6333	6.87192
	317000	38.5	27.5	25.6	30.5333	6.96443		317000	32.6	29	25.8	29.1333	3.40196		317000	18.5	27.8	25.9	24.0667	4.91359		317000	39.4	37.2	37.2	37.9333	1.27017
	317500	37	31.4	29.6	32.6667	3.85919		317500	43.5	43.5	39.8	42.2667	2.1362		317500	23.3	32.6	32.6	29.5	5.36936		317500	29.8	22.8	22.8	25.1333	4.04145
	318000	38.9	36.9	36.9	37.5667	1.1547		318000	35.8	34.1	32.3	34.0667	1.75024		318000	27.5	27	27	27.1667	0.288675		318000	35	31.1	31.1	32.4	2.25167
	318500	41.8	29.9	29.9	33.8667	6.87047		318500	43.1	39.4	39.4	40.6333	2.1362		318500	26.3	26.3	26.3	26.3	0		318500	35	31.2	31.2	32.4667	2.19393
	319000	43.3	25.3	25.3	31.3	10.3923		319000	34.6	28.8	28.8	30.7333	3.34863		319000	26	33.9	33.9	31.2667	4.56107		319000	27.2	21.4	21.4	23.3333	3.34863
	319500	33.8	26.7	26.7	29.0667	4.09919		319500	40.2	35.5	33.7	36.4667	3.35609		319500	28.2	29.6	29.6	29.1333	0.80829		319500	33.8	27	27	29.2667	3.92598
	320000	39.7	29.8	29.8	33.1	5.71577		320000	39.5	33.8	30	34.4333	4.78156		320000	18.9	35.6	30.4	28.3	8.54576		320000	33	27.2	27.2	29.1333	3.34863
	320500	31.3	27.9	27.9	29.0333	1.96299		320500	52.1	44.2	39.7	45.3333	6.27721		320500	16.8	28.9	25.7	23.8	6.26977		320500	33.2	18.5	18.5	23.4	8.48705
	321000	33.2	24	24	27.0667	5.31162		321000	37.3	33.6	33.6	34.8333	2.1362		321000	17	27.1	27.1	23.7333	5.83124		321000	33.4	26.5	26.5	28.8	3.98372
	321500	35.6	33.8	31.9	33.7667	1.85023		321500	43.3	43.3	41.3	42.6333	1.1547		321500	27.1	28.9	28.9	28.3	1.03923		321500	28.7	24.5	24.5	25.9	2.42487
	322000	37.6	28.2	28.2	31.3333	5.42709		322000	39.2	39.2	37.5	38.6333	0.981495		322000	18.5	29	29	25.5	6.06218		322000	30.1	26.1	26.1	27.4333	2.3094
	322500	38.2	32.8	32.8	34.6	3.11769		322500	45.2	41.3	41.3	42.6	2.25167		322500	14.2	29.5	27.5	23.7333	8.31645		322500	29.4	27.6	27.6	28.2	1.03923
	323000	43.1	37.3	37.3	39.2333	3.34863		323000	45.7	43.9	43.9	44.5	1.03923		323000	19.5	35.6	33.8	29.6333	8.82175		323000	33.6	28.9	28.9	30.4667	2.71355
	323500	30.5	26.9	26.9	28.1	2.07846		323500	35.1	31.2	31.2	32.5	2.25167		323500	30	32.9	27.1	30	2.9		323500	26.9	23.3	23.3	24.5	2.07846
	324000	37.6	29.3	29.3	32.0667	4.79201		324000	39.5	33.8	33.8	35.7	3.2909		324000	27.9	35.5	31.8	31.7333	3.80044		324000	34.4	30.7	30.7	31.9333	2.1362
	324500	38.5	29.2	29.2	32.3	5.36936		324500	35.5	31.7	29.9	32.3667	2.8589		324500	16.2	25.8	25.8	22.6	5.54256		324500	28.3	26.4	26.4	27.0333	1.09697
	325000	33.1	23.2	23.2	26.5	5.71577		325000	37.6	37.6	34.4	36.5333	1.84752		325000	28.7	21.2	21.2	23.7	4.33013		325000	29.7	26.7	26.7	27.7	1.73205
	325500	36.5	28.9	28.9	31.4333	4.38786		325500	35.6	30.2	26.7	30.8333	4.48367		325500	24.2	37.3	33.8	31.7667	6.78258		325500	28.3	26.5	26.5	27.1	1.03923
	326000	42.2	26.3	26.3	31.6	9.17987		326000	40	38.9	37.2	38.7	1.41067		326000	27	31.3	29.5	29.2667	2.15948		326000	37.3	30.9	30.9	33.0333	3.69504
	326500	36.6	32.8	32.8	34.0667	2.19393		326500	40.5	40.5	38.9	39.9667	0.92376		326500	21.6	30.8	30.8	27.7333	5.31162		326500	28.6	23.5	23.5	25.2	2.94449
	327000	42.7	32.6	32.6	35.9667	5.83124		327000	41.7	41.7	39.7	41.0333	1.1547		327000	27.5	32.9	31	30.4667	2.73922		327000	16.4	14.1	14.1	14.8667	1.32791
	327500	43.5	37.5	37.5	39.5	3.4641		327500	40.2	40.2	40.2	40.2	0		327500	40	27.5	27.5	31.6667	7.21688		327500	29.9	25.1	25.1	26.7	2.77128
	328000	36.9	23.3	23.3	27.8333	7.85196		328000	34.5	32.8	31.1	32.8	1.7		328000	27.5	36.4	34.5	32.8	4.68722		328000	27.6	22.6	22.6	24.2667	2.88675
	328500	36.6	27.2	25.3	29.7	6.05062		328500	45.7	41.7	37.6	41.6667	4.0501		328500	26.3	26.8	26.8	26.6333	0.288675		328500	30.6	26.7	26.7	28	2.25167
	329000	38.5	30.8	30.8	33.3667	4.4456		329000	54.1	46.3	44.2	48.2	5.21632		329000	16.1	30.2	28.3	24.8667	7.65136		329000	35.3	31.6	31.6	32.8333	2.1362
	329500	32.5	25.8	25.8	28.0333	3.86825		329500	44.4	41	39.1	41.5	2.68514		329500	29	31.7	31.7	30.8	1.55885		329500	22.8	21.1	21.1	21.6667	0.981495
	330000	40.3	28.2	28.2	32.2333	6.98594		330000	36.5	30.8	30.8	32.7	3.2909		330000	22.2	31	31	28.0667	5.08068		330000	32.9	30.5	30.5	31.3	1.38564
	330500	50.3	34.7	34.7	39.9	9.00666		330500	45.5	40.2	34.6	40.1	5.45069		330500	25.8	36.4	33	31.7333	5.41233		330500	26	22.3	22.3	23.5333	2.1362
	331000	36.6	30.8	30.8	32.7333	3.34863		331000	40.3	31.6	31.6	34.5	5.02295		331000	26.5	26.6	22.8	25.3	2.16564		331000	22.8	21.2	21.2	21.7333	0.92376
	331500	34.7	26	26	28.9	5.02295		331500	40.5	38.6	35	38.0333	2.79344		331500	19	41.3	41.3	33.8667	12.8749		331500	42.4	38.6	38.6	39.8667	2.19393
	332000	38	26.6	26.6	30.4	6.58179		332000	32.7	30.8	30.8	31.4333	1.09697		332000	16.5	29.9	26.1	24.1667	6.90604		332000	32.8	27	27	28.9333	3.34863
	332500	35.7	28.2	28.2	30.7	4.33013		332500	31.8	30.1	28.3	30.0667	1.75024		332500	16.7	34.1	34.1	28.3	10.0459		332500	31.1	24.8	24.8	26.9	3.63731
	333000	42	28	28	32.6667	8.0829		333000	34.1	32.2	28.4	31.5667	2.9023		333000	36.4	31.3	31.3	33	2.94449		333000	37.2	29.3	29.3	31.9333	4.56107
	333500	37.2	23.6	23.6	28.1333	7.85196		333500	41	37.5	33.8	37.4333	3.60046		333500	21.5	29.2	27.3	26	4.01123		333500	43.3	37.3	37.3	39.3	3.4641
	334000	36.8	31.2	31.2	33.0667	3.23316		334000	48.3	42	38.3	42.8667	5.05602		334000	22.2	36.9	36.9	32	8.48705		334000	34.8	31.2	31.2	32.4	2.07846
	334500	40.8	31.2	31.2	34.4	5.54256		334500	38.3	34.5	33	35.2667	2.73191		334500	24	40.3	40.3	34.8667	9.41081		334500	38.3	36.9	36.9	37.3667	0.80829
	335000	44.8	28.6	28.6	34	9.35307		335000	41	35.1	35.1	37.0667	3.40637		335000	22	26.8	26.8	25.2	2.77128		335000	35.8	26.9	26.9	29.8667	5.13842
	335500	37.6	26.2	26.2	30	6.58179		335500	35	30.1	30.1	31.7333	2.82902		335500	33.8	31.2	31.2	32.0667	1.50111		335500	31.9	27.2	27.2	28.7667	2.71355
	336000	50	40	40	43.3333	5.7735		336000	45	43.3	41.5	43.2667	1.75024		336000	18.6	29.7	27.1	25.1333	5.80546		336000	21.7	18.1	18.1	19.3	2.07846
	336500	38.6	28	28	31.5333	6.11991		336500	32.9	32.9	31	32.2667	1.09697		336500	26.9	32.8	30.9	30.2	3.01164		336500	33.4	28.6	28.6	30.2	2.77128
	337000	43.7	29.2	29.2	34.0333	8.37158		337000	34.4	30.5	30.5	31.8	2.25167		337000	18.7	26.5	26.5	23.9	4.50333		337000	26.7	26.7	26.7	26.7	0
	337500	44.1	32.6	32.6	36.4333	6.63953		337500	54.1	52.1	50.3	52.1667	1.90088		337500	26.3	32.2	30.3	29.6	3.01164		337500	37.5	37.5	37.5	37.5	0
	338000	44.6	32.4	32.4	36.4667	7.04367		338000	40.7	34.8	30.6	35.3667	5.07379		338000	21.2	34.2	34.2	29.8667	7.50555		338000	33.3	33.3	33.3	33.3	0
	338500	38.2	27.2	27.2	30.8667	6.35085		338500	41.3	41.3	30.5	37.7	6.23538		338500	23.4	25.9	25.9	25.0667	1.44338		338500	33	29.1	29.1	30.4	2.25167
	339000	36.6	28.9	28.9	31.4667	4.4456		339000	44.6	42.7	35.2	40.8333	4.97024		339000	28.7	27.4	27.4	27.8333	0.750555		339000	42.4	38.5	38.5	39.8	2.25167
	339500	49	33.9	33.9	38.9333	8.71799		339500	36.8	35	33.2	35	1.8		339500	21.6	45.7	41.8	36.3667	12.9361		339500	29.5	26	26	27.1667	2.02073
	340000	41	31.6	29.8	34.1333	6.01443		340000	31.3	31.3	31.3	31.3	0		340000	17.4	29.3	29.3	25.3333	6.87047		340000	26	20.7	20.7	22.4667	3.05996
	340500	36.9	29.5	29.5	31.9667	4.27239		340500	41.3	37.6	35.7	38.2	2.84781		340500	15.7	28.2	28.2	24.0333	7.21688		340500	38.6	35	35	36.2	2.07846
	341000	36.4	26.8	26.8	30	5.54256		341000	41	41	41	41	0		341000	21.6	31.3	31.3	28.0667	5.6003		341000	21.9	21.9	21.9	21.9	4.35117e-15
	341500	50.5	31.4	31.4	37.7667	11.0274		341500	31.5	29.7	26	29.0667	2.80416		341500	19.1	34.4	34.4	29.3	8.83346		341500	25	19.2	19.2	21.1333	3.34863
	342000	45.5	32.6	32.6	36.9	7.44782		342000	46.3	39.2	37.3	40.9333	4.74377		342000	20.4	31	31	27.4667	6.11991		342000	38	34.1	32.3	34.8	2.91376
	342500	44.4	30.9	30.9	35.4	7.79423		342500	32.4	28.6	28.6	29.8667	2.19393		342500	26.9	36.6	33.1	32.2	4.91223		342500	29.4	26	26	27.1333	1.96299
	343000	36.4	29.9	29.9	32.0667	3.75278		343000	50.8	46.9	41.3	46.3333	4.77528		343000	28.7	36.2	32.5	32.4667	3.75011		343000	36.5	30.8	30.8	32.7	3.2909
	343500	36.5	28.8	28.8	31.3667	4.4456		343500	47.8	47.8	46.1	47.2333	0.981495		343500	35.5	24.9	23.1	27.8333	6.70025		343500	30.6	21.1	21.1	24.2667	5.48483
	344000	33.9	26.7	26.7	29.1	4.15692		344000	30.6	29.8	28	29.4667	1.33167		344000	21.6	32.5	30.7	28.2667	5.84323		344000	34.8	31.3	30	32.0333	2.48261
	344500	38.8	27.7	27.7	31.4	6.40859		344500	42	32.5	30.5	35	6.1441		344500	29.4	34	32.1	31.8333	2.31157		344500	29.4	27.7	24.2	27.1	2.65141
	345000	42.4	26.4	26.4	31.7333	9.2376		345000	45.7	43.9	43.9	44.5	1.03923		345000	18.5	30	28.2	25.5667	6.18574		345000	37.9	35.1	35.1	36.0333	1.61658
	345500	44.8	35.8	35.8	38.8	5.19615		345500	39.5	39.5	38.5	39.1667	0.57735		345500	11.8	33.2	33.2	26.0667	12.3553		345500	31.8	28.1	28.1	29.3333	2.1362
	346000	31.3	23.4	23.4	26.0333	4.56107		346000	42.2	38.5	33	37.9	4.62925		346000	29.2	24.2	23.8	25.7333	3.00888		346000	30.6	24.8	24.8	26.7333	3.34863
	346500	47.6	28.7	28.7	35	10.9119		346500	47.4	43.9	40.3	43.8667	3.55012		346500	22.5	33.7	29.9	28.7	5.69561		346500	36.4	30.6	30.6	32.5333	3.34863
	347000	29.8	26	26	27.2667	2.19393		347000	43.1	43.1	41.3	42.5	1.03923		347000	24.9	41.5	41.5	35.9667	9.58401		347000	36	30.6	30.6	32.4	3.11769
	347500	40.5	27	27	31.5	7.79423		347500	39.1	39.1	37.9	38.7	0.69282		347500	21.9	29.5	29.5	26.9667	4.38786		347500	31.7	21.8	21.8	25.1	5.71577
	348000	39.2	28.7	28.7	32.2	6.06218		348000	49.3	47.4	43.5	46.7333	2.95691		348000	23.5	33.2	33.2	29.9667	5.6003		348000	32.6	28.2	28.2	29.6667	2.54034
	348500	29.4	25.5	23.5	26.1333	3.00056		348500	46.5	42.6	40.7	43.2667	2.95691		348500	19.4	27.2	27.2	24.6	4.50333		348500	23.6	23	23	23.2	0.34641
	349000	32.8	27.5	26	28.7667	3.57258		349000	42.4	36	32.4	36.9333	5.06491		349000	18.8	34.5	34.5	29.2667	9.0644		349000	31.8	28.1	26.2	28.7	2.84781
	349500	39.4	23.6	21.5	28.1667	9.78485		349500	38.3	36.5	32.6	35.8	2.91376		349500	26.1	35.5	35.5	32.3667	5.42709		349500	31.8	26.6	26.6	28.3333	3.00222
	350000	35.2	26	26	29.0667	5.31162		350000	41.7	38	38	39.2333	2.1362		350000	23.3	21.7	21.7	22.2333	0.92376		350000	27.9	26.1	26.1	26.7	1.03923
	350500	41.2	30.4	28.5	33.3667	6.85006		350500	37.3	31.9	30.2	33.1333	3.7072		350500	20.2	36.6	36.6	31.1333	9.46854		350500	23.1	21.4	21.4	21.9667	0.981495
	351000	45.5	34.1	34.1	37.9	6.58179		351000	34.5	32.7	32.7	33.3	1.03923		351000	26.3	35.2	35.2	32.2333	5.13842		351000	31.9	30.2	30.2	30.7667	0.981495
	351500	38.6	27.5	25.7	30.6	6.98642		351500	40.8	38.9	36.9	38.8667	1.95021		351500	16.7	37.7	37.7	30.7	12.1244		351500	32.5	28.7	28.7	29.9667	2.19393
	352000	44.8	31.4	31.4	35.8667	7.73649		352000	45.2	39.4	35.5	40.0333	4.88092		352000	25.2	17.9	16.1	19.7333	4.81906		352000	36.8	33.1	33.1	34.3333	2.1362
	352500	41.8	24.8	24.8	30.4667	9.81495		352500	50.5	44.6	40.8	45.3	4.88774		352500	21.9	25	25	23.9667	1.78979		352500	27.8	25.9	25.9	26.5333	1.09697
	353000	38.9	31.1	31.1	33.7	4.50333		353000	37.5	35.5	31.5	34.8333	3.05505		353000	20	34.4	34.4	29.6	8.31384		353000	36.4	36.4	36.4	36.4	0
	353500	46.9	36.1	36.1	39.7	6.23538		353500	50.3	46.3	39.2	45.2667	5.62168		353500	17.9	26.5	26.5	23.6333	4.96521		353500	22.8	19	19	20.2667	2.19393
	354000	41.8	29.2	29.2	33.4	7.27461		354000	42.9	35.1	33.1	37.0333	5.17816		354000	22.7	29.5	27.6	26.6	3.50856		354000	22.5	22.5	22.5	22.5	0
	354500	49.8	35.7	35.7	40.4	8.14064		354500	41.3	35.2	35.2	37.2333	3.52184		354500	20.3	21.7	18.6	20.2	1.55242		354500	22.9	16.3	16.3	18.5	3.81051
	355000	42	34.7	32.9	36.5333	4.81906		355000	38.8	31.4	31.4	33.8667	4.27239		355000	20.7	24.9	24.9	23.5	2.42487		355000	16.1	14.5	14.5	15.0333	0.92376
	355500	44.1	32.5	32.5	36.3667	6.69726		355500	44.1	42.2	38.3	41.5333	2.95691		355500	21.5	32.9	31	28.4667	6.10765		355500	37.3	31.9	31.9	33.7	3.11769
	356000	37.3	33.3	33.3	34.6333	2.3094		356000	40	36.1	34.2	36.7667	2.95691		356000	29.2	34.1	32.3	31.8667	2.47857		356000	21.6	19.6	19.6	20.2667	1.1547
	356500	36.8	34.8	34.8	35.4667	1.1547		356500	29.6	27.8	27.8	28.4	1.03923		356500	25.6	30.1	30.1	28.6	2.59808		356500	23	20.1	20.1	21.0667	1.67432
	357000	41.2	28.1	28.1	32.4667	7.56329		357000	47.6	42.4	38.8	42.9333	4.42418		357000	25.1	24.9	24.9	24.9667	0.11547		357000	28.2	26.3	26.3	26.9333	1.09697
	357500	41	29.3	29.3	33.2	6.755		357500	44.8	37.3	35.5	39.2	4.93254		357500	24.9	35.3	35.3	31.8333	6.00444		357500	25.7	23.8	23.8	24.4333	1.09697
	358000	36	30.6	30.6	32.4	3.11769		358000	49	49	45.2	47.7333	2.19393		358000	18.5	28.2	26.3	24.3333	5.14036		358000	30.8	28.9	28.9	29.5333	1.09697
	358500	43.5	28.3	28.3	33.3667	8.77572		358500	40.8	38.9	33	37.5667	4.06735		358500	22.3	24.6	24.6	23.8333	1.32791		358500	37.7	33.9	33.9	35.1667	2.19393
	359000	39.5	25.2	25.2	29.9667	8.25611		359000	37.3	33.8	33.8	34.9667	2.02073		359000	18.6	27.9	27.9	24.8	5.36936		359000	32.6	24.9	24.9	27.4667	4.4456
	359500	35.1	29.2	29.2	31.1667	3.40637		359500	51.8	51.8	50	51.2	1.03923		359500	20.8	34.5	34.5	29.9333	7.9097		359500	30	28.2	28.2	28.8	1.03923
	360000	40.8	33.3	33.3	35.8	4.33013		360000	36.9	36.9	33.2	35.6667	2.1362		360000	19.1	32.9	32.9	28.3	7.96743		360000	33.1	29.6	29.6	30.7667	2.02073
	360500	38.8	23.1	23.1	28.3333	9.0644		360500	42.4	40.5	40.5	41.1333	1.09697		360500	26.2	35.2	35.2	32.2	5.19615		360500	38.6	31.6	31.6	33.9333	4.04145
	361000	43.7	26.2	26.2	32.0333	10.1036		361000	40.3	38.5	38.5	39.1	1.03923		361000	34.5	26.9	25.1	28.8333	4.98932		361000	39.1	35.2	35.2	36.5	2.25167
	361500	47.2	29.2	29.2	35.2	10.3923		361500	44.2	42.4	36.6	41.0667	3.97157		361500	18.8	24.6	22.8	22.0667	2.96873		361500	32.7	32.7	32.7	32.7	0
	362000	41.8	29.9	29.9	33.8667	6.87047		362000	45.9	41	39.2	42.0333	3.46747		362000	24.2	29.3	29.3	27.6	2.94449		362000	19.9	18.1	18.1	18.7	1.03923
	362500	37.3	22.3	22.3	27.3	8.66025		362500	48.3	42.9	39.4	43.5333	4.48367		362500	23.1	33.1	31.3	29.1667	5.33042		362500	27.8	24.3	24.3	25.4667	2.02073
	363000	47.6	25.5	25.5	32.8667	12.7594		363000	42.9	42.9	39.1	41.6333	2.19393		363000	19	32.7	32.7	28.1333	7.9097		363000	32.7	27	27	28.9	3.2909
	363500	42.4	30.1	30.1	34.2	7.10141		363500	45.7	43.7	41.7	43.7	2		363500	25.6	19.1	19.1	21.2667	3.75278		363500	20.4	16.7	16.7	17.9333	2.1362
	364000	36.1	27.5	27.5	30.3667	4.96521		364000	42	36.8	33.3	37.3667	4.37759		364000	28.6	35.2	31.8	31.8667	3.30051		364000	32.9	29.1	29.1	30.3667	2.19393
	364500	35.6	26.2	26.2	29.3333	5.42709		364500	34.2	32.4	28.6	31.7333	2.8589		364500	19.7	26.7	24.8	23.7333	3.61985		364500	31.8	26.5	26.5	28.2667	3.05996
	365000	39.5	35.7	33.8	36.3333	2.9023		365000	42.6	33.2	29.6	35.1333	6.71218		365000	23.9	33.4	31.7	29.6667	5.0659		365000	18.6	17.1	17.1	17.6	0.866025
	365500	47.6	31.6	31.6	36.9333	9.2376		365500	51.8	51.8	47.8	50.4667	2.3094		365500	12.8	30.4	30.4	24.5333	10.1614		365500	22.7	22.7	22.7	22.7	0
	366000	32.7	25	25	27.5667	4.4456		366000	38.9	38.9	36.9	38.2333	1.1547		366000	35.5	35.5	35.5	35.5	0		366000	23.4	19.5	19.5	20.8	2.25167
	366500	40.8	31.5	31.5	34.6	5.36936		366500	41	41	38.9	40.3	1.21244		366500	29.9	31.6	29.9	30.4667	0.981495		366500	21.7	16.7	16.7	18.3667	2.88675
	367000	45.9	30.6	30.6	35.7	8.83346		367000	41.8	38	38	39.2667	2.19393		367000	20	20.9	17.7	19.5333	1.65025		367000	33.9	28.6	28.6	30.3667	3.05996
	367500	35.8	31.8	31.8	33.1333	2.3094		367500	40	36.1	36.1	37.4	2.25167		367500	31.3	28.9	28.9	29.7	1.38564		367500	33.9	32.1	32.1	32.7	1.03923
	368000	36.4	32.6	32.6	33.8667	2.19393		368000	44.6	41	33.6	39.7333	5.60833		368000	26.9	35	35	32.3	4.67654		368000	33.6	24.3	24.3	27.4	5.36936
	368500	41	25.6	25.6	30.7333	8.89119		368500	47.6	45.7	40	44.4333	3.95517		368500	35.2	27.5	27.5	30.0667	4.4456		368500	22.7	22.7	22.7	22.7	0
	369000	42.6	31	31	34.8667	6.69726		369000	39.7	37.7	34	37.1333	2.89194		369000	25.1	31.2	29.4	28.5667	3.13422		369000	33.4	29.8	29.8	31	2.07846
	369500	35.5	28.5	28.5	30.8333	4.04145		369500	35.5	31.7	31.7	32.9667	2.19393		369500	16.5	38.3	36.5	30.4333	12.1001		369500	31.6	27.9	27.9	29.1333	2.1362
	370000	46.7	27.2	27.2	33.7	11.2583		370000	38.9	33.4	33.4	35.2333	3.17543		370000	19.6	34.2	34.2	29.3333	8.42931		370000	32.6	30.7	30.7	31.3333	1.09697
	370500	46.3	30.3	30.3	35.6333	9.2376		370500	40	38.2	34.4	37.5333	2.8589		370500	23.3	25.2	25.2	24.5667	1.09697		370500	40.3	36.9	36.9	38.0333	1.96299
	371000	38.9	29.7	29.7	32.7667	5.31162		371000	41.7	37.6	32.2	37.1667	4.7648		371000	22.6	31.8	31.8	28.7333	5.31162		371000	25.5	16.4	16.4	19.4333	5.25389
	371500	37.9	22.3	22.3	27.5	9.00666		371500	47.6	43.7	43.7	45	2.25167		371500	17.8	27.5	25.7	23.6667	5.15978		371500	27.9	25	25	25.9667	1.67432
	372000	43.5	29.6	29.6	34.2333	8.02517		372000	46.9	43.3	37.6	42.6	4.68935		372000	12.5	28.1	28.1	22.9	9.00666		372000	24.9	23.1	23.1	23.7	1.03923
	372500	39.1	30.9	30.9	33.6333	4.73427		372500	43.1	41.2	39.2	41.1667	1.95021		372500	15.7	27.5	27.5	23.5667	6.81273		372500	29.9	24.6	24.6	26.3667	3.05996
	373000	48.1	24	24	32.0333	13.9141		373000	41.7	39.7	33.7	38.3667	4.16333		373000	24.3	30	30	28.1	3.2909		373000	33.2	31.4	30.1	31.5667	1.55671
	373500	46.7	39.5	39.5	41.9	4.15692		373500	46.3	44.4	37.5	42.7333	4.63069		373500	15.1	34.4	32.5	27.3333	10.6369		373500	29.8	21	19.2	23.3333	5.67215
	374000	39.1	23.5	23.5	28.7	9.00666		374000	43.3	39.5	37.3	40.0333	3.03535		374000	32.8	30	30	30.9333	1.61658		374000	29.8	29.8	29.8	29.8	0
	374500	44.8	25.8	25.8	32.1333	10.9697		374500	51.8	42.2	40.2	44.7333	6.20108		374500	28.2	38	36.9	34.3667	5.36874		374500	29.6	29.6	29.6	29.6	4.35117e-15
	375000	31.5	19.2	19.2	23.3	7.10141		375000	44.6	44.6	44.6	44.6	0		375000	32.4	27.3	25.5	28.4	3.57911		375000	42.2	36.5	36.5	38.4	3.2909
	375500	40.7	27.9	27.9	32.1667	7.39008		375500	49	49	45	47.6667	2.3094		375500	30.9	30.6	30.6	30.7	0.173205		375500	31.5	25.6	25.6	27.5667	3.40637
	376000	42.7	33	33	36.2333	5.6003		376000	34.1	30.3	30.1	31.5	2.25389		376000	22.4	32.6	32.6	29.2	5.88897		376000	46.1	42.2	42.2	43.5	2.25167
	376500	45	27.5	27.5	33.3333	10.1036		376500	31.3	31.3	25.8	29.4667	3.17543		376500	22.9	31.5	31.5	28.6333	4.96521		376500	21.6	21.6	21.6	21.6	4.35117e-15
	377000	41	28.5	28.5	32.6667	7.21688		377000	39.1	33.8	27.4	33.4333	5.85861		377000	21.8	26.5	26.5	24.9333	2.71355		377000	33	31.1	31.1	31.7333	1.09697
	377500	35.7	27.7	27.7	30.3667	4.6188		377500	42.4	40.5	38.8	40.5667	1.80093		377500	31.4	27.7	25.8	28.3	2.84781		377500	37.2	33.4	33.4	34.6667	2.19393
	378000	36.6	27.4	27.4	30.4667	5.31162		378000	42.9	42.9	41	42.2667	1.09697		378000	15.9	27	23.1	22	5.63116		378000	32.3	28.9	28.9	30.0333	1.96299
	378500	33.2	25.8	25.8	28.2667	4.27239		378500	50.8	43.3	41.3	45.1333	5.00833		378500	20.7	32.1	30.2	27.6667	6.10765		378500	32.4	27	27	28.8	3.11769
	379000	45	30.5	30.5	35.3333	8.37158		379000	41.7	39.5	33.7	38.3	4.1328		379000	26.5	17.4	17.4	20.4333	5.25389		379000	25.9	20.3	20.3	22.1667	3.23316
	379500	36.2	25.3	25.3	28.9333	6.29312		379500	39.8	38.2	34.6	37.5333	2.66333		379500	27.8	29.5	29.5	28.9333	0.981495		379500	33.8	31.6	31.6	32.3333	1.27017
	380000	35.2	29.4	29.4	31.3333	3.34863		380000	43.3	39.2	39.2	40.5667	2.36714		380000	10.5	29.7	29.7	23.3	11.0851		380000	32.9	30.4	30.4	31.2333	1.44338
	380500	52.1	36.8	36.8	41.9	8.83346		380500	36.4	31	27.2	31.5333	4.62313		380500	20	31.9	30.2	27.3667	6.4361		380500	36.6	28.9	28.9	31.4667	4.4456
	381000	40.2	28.7	28.7	32.5333	6.63953		381000	37.5	35.6	35.6	36.2333	1.09697		381000	25.8	28.4	25.9	26.7	1.47309		381000	33	25.7	25.7	28.1333	4.21466
	381500	42	34.4	34.4	36.9333	4.38786		381500	51.3	49.3	45.5	48.7	2.94618		381500	29.7	22	17.8	23.1667	6.03517		381500	23.5	17.6	17.6	19.5667	3.40637
	382000	39.8	28.7	28.7	32.4	6.40859		382000	38.8	36.9	35.2	36.9667	1.80093		382000	17.1	17.8	16	16.9667	0.907377		382000	33.6	28.2	28.2	30	3.11769
	382500	46.1	30	30	35.3667	9.29534		382500	37.3	35.3	31.3	34.6333	3.05505		382500	14	28.7	28.7	23.8	8.48705		382500	34.7	27.4	25.5	29.2	4.85695
	383000	33.1	29.2	29.2	30.5	2.25167		383000	37.7	34.1	30.5	34.1	3.6		383000	19.2	23.8	20.6	21.2	2.35797		383000	26.7	18.7	18.7	21.3667	4.6188
	383500	45.2	34	34	37.7333	6.46632		383500	41.3	39.5	39.5	40.1	1.03923		383500	22.8	15.4	13.5	17.2333	4.91359		383500	24.2	18.6	18.6	20.4667	3.23316
	384000	40.3	30.7	30.7	33.9	5.54256		384000	35.8	33.8	30.7	33.4333	2.5697		384000	25.7	39.1	31.1	31.9667	6.74191		384000	38.3	25.1	25.1	29.5	7.62102
	384500	41.7	30.5	28.7	33.6333	7.04367		384500	44.2	38.6	35.5	39.4333	4.40946		384500	38	43.9	39.8	40.5667	3.02379		384500	41.8	36.1	36.1	38	3.2909
	385000	43.3	23.7	23.7	30.2333	11.3161		385000	44.6	44.6	44.6	44.6	0		385000	32.2	46.1	46.1	41.4667	8.02517		385000	28.8	24.9	24.9	26.2	2.25167
	385500	33.1	20.1	20.1	24.4333	7.50555		385500	46.1	42.4	42.4	43.6333	2.1362		385500	22.3	34.1	34.1	30.1667	6.81273		385500	28.4	25.6	25.6	26.5333	1.61658
	386000	36.8	24.4	24.4	28.5333	7.15914		386000	38.5	38.5	36.6	37.8667	1.09697		386000	23.9	29.5	27.5	26.9667	2.83784		386000	23.7	21.7	21.7	22.3667	1.1547
	386500	41.3	28.4	28.4	32.7	7.44782		386500	42	38.3	38.3	39.5333	2.1362		386500	18.6	21.3	21.3	20.4	1.55885		386500	23.5	17.6	17.6	19.5667	3.40637
	387000	36.8	25.6	25.6	29.3333	6.46632		387000	42.2	36.5	36.5	38.4	3.2909		387000	18.4	37.5	33.9	29.9333	10.1491		387000	24	22.2	22.2	22.8	1.03923
	387500	39.2	32.1	32.1	34.4667	4.09919		387500	42.9	41	41	41.6333	1.09697		387500	16.1	39.1	37.2	30.8	12.766		387500	31	24.1	24.1	26.4	3.98372
	388000	40.3	26.3	26.3	30.9667	8.0829		388000	39.4	35.6	33.7	36.2333	2.9023		388000	20	38	38	32	10.3923		388000	21.5	20	20	20.5	0.866025
	388500	38.5	30.8	30.8	33.3667	4.4456		388500	33	33	30.1	32.0333	1.67432		388500	19.8	37.2	37.2	31.4	10.0459		388500	23.1	21.9	21.9	22.3	0.69282
	389000	38.9	23.5	23.5	28.6333	8.89119		389000	35.7	32.5	28.7	32.3	3.50428		389000	20.2	24.8	24.8	23.2667	2.65581		389000	36.6	27.9	27.9	30.8	5.02295
	389500	47.6	34.1	34.1	38.6	7.79423		389500	42.6	40.7	36.9	40.0667	2.9023		389500	29.5	34.4	34.4	32.7667	2.82902		389500	26.3	24.4	24.4	25.0333	1.09697
	390000	43.9	29.9	29.9	34.5667	8.0829		390000	35.2	35.2	33.3	34.5667	1.09697		390000	24.1	24	22.1	23.4	1.12694		390000	38.2	22.9	22.9	28	8.83346
	390500	43.3	33.8	33.8	36.9667	5.48483		390500	41.7	41.7	39.8	41.0667	1.09697		390500	21	29.6	25.8	25.4667	4.30968		390500	27.7	24	24	25.2333	2.1362
	391000	45	32.6	32.6	36.7333	7.15914		391000	43.9	38.2	36.2	39.4333	3.99541		391000	25.4	31.8	30	29.0667	3.30051		391000	26.5	21.8	21.8	23.3667	2.71355
	391500	39.8	34.1	34.1	36	3.2909		391500	52.4	40.7	40.7	44.6	6.755		391500	21.8	41.8	41.8	35.1333	11.547		391500	29.8	22.3	22.3	24.8	4.33013
	392000	36.4	30.3	30.3	32.3333	3.52184		392000	33.3	31.3	29.4	31.3333	1.95021		392000	28.7	26.8	26.8	27.4333	1.09697		392000	31.6	23.3	23.3	26.0667	4.79201
	392500	43.5	27.5	27.5	32.8333	9.2376		392500	32.8	31.2	29.2	31.0667	1.8037		392500	28.2	31.9	31.9	30.6667	2.1362		392500	29.6	27.7	27.7	28.3333	1.09697
	393000	41.7	27.8	27.8	32.4333	8.02517		393000	39.2	31.7	28	32.9667	5.70643		393000	15.9	29.7	29.7	25.1	7.96743		393000	29.2	23.4	23.4	25.3333	3.34863
	393500	44.1	33.4	33.4	36.9667	6.17765		393500	41.3	39.7	37.9	39.6333	1.70098		393500	13.1	25.3	25.3	21.2333	7.04367		393500	23.6	18.6	18.6	20.2667	2.88675
	394000	45.9	31.2	31.2	36.1	8.48705		394000	32.7	28.5	28.5	29.9	2.42487		394000	23.7	32.7	32.7	29.7	5.19615		394000	28.1	24.3	24.3	25.5667	2.19393
	394500	46.7	38.3	38.3	41.1	4.84974		394500	36.2	28.6	28.6	31.1333	4.38786		394500	18.1	34.5	34.5	29.0333	9.46854		394500	31.6	27.9	27.9	29.1333	2.1362
	395000	40.8	26.6	26.6	31.3333	8.19837		395000	30.9	30.9	25.1	28.9667	3.34863		395000	25.7	33.8	33.8	31.1	4.67654		395000	35.7	33.8	31.9	33.8	1.9
	395500	39.8	26	26	30.6	7.96743		395500	37.3	37.3	33.8	36.1333	2.02073		395500	34.5	26.2	26.2	28.9667	4.79201		395500	26.7	21	21	22.9	3.2909
	396000	38.2	28.7	28.7	31.8667	5.48483		396000	36.6	36.6	35.6	36.2667	0.57735		396000	24	29.4	29.4	27.6	3.11769		396000	33.2	29.7	29.7	30.8667	2.02073
	396500	42	24.4	22.8	29.7333	10.6533		396500	34	28.3	24.8	29.0333	4.64363		396500	20.7	24.8	24.8	23.4333	2.36714		396500	27	23.4	23.4	24.6	2.07846
	397000	37.9	22.1	22.1	27.3667	9.12213		397000	49.8	41.8	36	42.5333	6.92917		397000	21	41.3	39.4	33.9	11.212		397000	34.4	28.9	28.9	30.7333	3.17543
	397500	44.4	31.9	31.9	36.0667	7.21688		397500	57.8	51.8	50	53.2	4.08412		397500	16.3	25.5	23.7	21.8333	4.87579		397500	29.2	23.9	23.9	25.6667	3.05996
	398000	36.5	30.7	30.7	32.6333	3.34863		398000	43.1	40.7	38.9	40.9	2.10713		398000	34.4	41.7	41.7	39.2667	4.21466		398000	27	21.6	21.6	23.4	3.11769
	398500	45.7	28.5	28.5	34.2333	9.93042		398500	40.2	38.3	36.4	38.3	1.9		398500	22	37.9	37.9	32.6	9.17987		398500	24.6	19.4	19.4	21.1333	3.00222
	399000	44.4	27.8	27.8	33.3333	9.58401		399000	46.9	38	33.1	39.3333	6.99595		399000	27.3	36.6	36.6	33.5	5.36936		399000	33.1	31.2	31.2	31.8333	1.09697
	399500	38	28.5	28.5	31.6667	5.48483		399500	40	34.4	32.3	35.5667	3.98037		399500	22.7	35.2	33.2	30.3667	6.71441		399500	27.6	27.6	27.6	27.6	4.35117e-15
	400000	35.6	30.9	30.9	32.4667	2.71355		400000	40	32.8	32.8	35.2	4.15692		400000	19.2	34.6	34.6	29.4667	8.89119		400000	37.9	32.2	32.2	34.1	3.2909
	400500	41.8	24.7	24.7	30.4	9.87269		400500	44.6	42.7	41	42.7667	1.80093		400500	26.5	34.2	34.2	31.6333	4.4456		400500	36.5	32.7	32.7	33.9667	2.19393
	401000	30.5	25.1	25.1	26.9	3.11769		401000	28.4	26.5	26.5	27.1333	1.09697		401000	23.5	29.2	29.2	27.3	3.2909		401000	31.1	27.4	27.4	28.6333	2.1362
	401500	32.6	26.8	26.8	28.7333	3.34863		401500	41.3	38	36.4	38.5667	2.49867		401500	31.6	28.2	28.2	29.3333	1.96299		401500	36.9	25.8	25.8	29.5	6.40859
	402000	42.7	32.3	32.3	35.7667	6.00444		402000	38.6	34.6	34.6	35.9333	2.3094		402000	22.6	35.3	35.3	31.0667	7.33235		402000	34	28.3	28.3	30.2	3.2909
	402500	44.1	34.5	34.5	37.7	5.54256		402500	46.1	42.2	42.2	43.5	2.25167		402500	13.4	26.8	26.8	22.3333	7.73649		402500	35.8	31.2	31.2	32.7333	2.65581
	403000	38.9	31.2	31.2	33.7667	4.4456		403000	40.7	40.7	36.8	39.4	2.25167		403000	27.3	30.3	30.3	29.3	1.73205		403000	19.2	11.5	11.5	14.0667	4.4456
	403500	40.5	31.3	31.3	34.3667	5.31162		403500	40.8	36.9	35	37.5667	2.95691		403500	24.4	26.8	26.8	26	1.38564		403500	31	24.4	24.4	26.6	3.81051
	404000	33.1	27.3	27.3	29.2333	3.34863		404000	43.3	36.8	34.5	38.2	4.56399		404000	27.5	30.7	30.7	29.6333	1.84752		404000	35.5	35.5	35.5	35.5	0
	404500	34	26.9	26.9	29.2667	4.09919		404500	32.6	32.6	30.7	31.9667	1.09697		404500	17.7	26.1	26.1	23.3	4.84974		404500	30.6	24.8	24.8	26.7333	3.34863
	405000	39.4	31.2	31.2	33.9333	4.73427		405000	46.7	43.1	43.1	44.3	2.07846		405000	28.7	23.4	21.6	24.5667	3.69098		405000	36.9	35	35	35.6333	1.09697
	405500	43.5	28.4	28.4	33.4333	8.71799		405500	52.9	46.9	43.1	47.6333	4.94099		405500	27.1	34.5	30.7	30.7667	3.70045		405500	45	39.1	39.1	41.0667	3.40637
	406000	45	30	30	35	8.66025		406000	33.2	27.3	24.8	28.4333	4.31316		406000	31.2	39.1	39.1	36.4667	4.56107		406000	37.2	29.8	29.8	32.2667	4.27239
	406500	30.4	25.1	25.1	26.8667	3.05996		406500	38.8	35.1	33.2	35.7	2.84781		406500	28.7	27.9	27.9	28.1667	0.46188		406500	24.6	22.8	22.8	23.4	1.03923
	407000	38.5	31.7	31.7	33.9667	3.92598		407000	38.5	36.6	34.6	36.5667	1.95021		407000	29.5	33.1	33.1	31.9	2.07846		407000	22.7	16.7	16.7	18.7	3.4641
	407500	42.9	31.2	31.2	35.1	6.755		407500	38.5	38.5	36.6	37.8667	1.09697		407500	23.3	27.8	27.8	26.3	2.59808		407500	21.3	16	16	17.7667	3.05996
	408000	52.6	39.8	39.8	44.0667	7.39008		408000	46.3	42.4	38.5	42.4	3.9		408000	16.7	22.4	22.4	20.5	3.2909		408000	37.5	31.7	31.7	33.6333	3.34863
	408500	36.2	28.6	28.6	31.1333	4.38786		408500	48.8	41.5	37.3	42.5333	5.81922		408500	18.8	20.6	20.6	20	1.03923		408500	23.4	20.2	20.2	21.2667	1.84752
	409000	39.8	29.5	29.5	32.9333	5.94671		409000	43.1	38.5	36.5	39.3667	3.38428		409000	23.8	23.4	23.4	23.5333	0.23094		409000	27	25.3	25.3	25.8667	0.981495
	409500	34	26.5	26.5	29	4.33013		409500	49	43.3	37.7	43.3333	5.65007		409500	31.5	36.5	36.5	34.8333	2.88675		409500	44.8	37.6	37.6	40	4.15692
	410000	40.8	30.7	30.7	34.0667	5.83124		410000	39.4	33.3	29	33.9	5.2259		410000	34.7	27	27	29.5667	4.4456		410000	38.9	33.4	33.4	35.2333	3.17543
	410500	35.5	23.6	23.6	27.5667	6.87047		410500	38.5	33.2	31.5	34.4	3.65103		410500	23.5	36.9	36.5	32.3	7.62365		410500	22.6	22.6	22.6	22.6	4.35117e-15
	411000	38.5	29	27.4	31.6333	6.00028		411000	44.1	38.3	34.5	38.9667	4.8346		411000	20.3	35.8	32.3	29.4667	8.12917		411000	30	25.7	25.7	27.1333	2.48261
	411500	42.7	27.8	27.8	32.7667	8.60252		411500	43.5	39.7	37.5	40.2333	3.03535		411500	15.9	33.4	31.4	26.9	9.57862		411500	27.5	23.7	21.9	24.3667	2.8589
	412000	30.9	21.7	21.7	24.7667	5.31162		412000	44.8	44.8	39.2	42.9333	3.23316		412000	18.3	29.7	29.7	25.9	6.58179		412000	29.7	20.4	20.4	23.5	5.36936
	412500	37.6	33.6	33.6	34.9333	2.3094		412500	44.6	42.7	42.7	43.3333	1.09697		412500	39.2	34.8	34.8	36.2667	2.54034		412500	27.4	21.9	21.9	23.7333	3.17543
	413000	50.8	38.9	38.9	42.8667	6.87047		413000	45.7	41	41	42.5667	2.71355		413000	29.4	28.8	26.9	28.3667	1.30512		413000	35.8	29.2	27.6	30.8667	4.34665
	413500	41.7	29.9	29.9	33.8333	6.81273		413500	46.9	39.5	35.7	40.7	5.69561		413500	24.5	38.8	38.8	34.0333	8.25611		413500	35.5	31.4	29.4	32.1	3.10966
	414000	34.8	29.7	29.7	31.4	2.94449		414000	56.2	52.4	46.9	51.8333	4.67582		414000	18.6	37.5	37.5	31.2	10.9119		414000	34.5	32.6	32.6	33.2333	1.09697
	414500	33.4	26.8	26.8	29	3.81051		414500	36.6	32.8	28.9	32.7667	3.85011		414500	28.3	34.5	32.7	31.8333	3.18957		414500	29.7	26.2	26.2	27.3667	2.02073
	415000	47.4	27.6	27.6	34.2	11.4315		415000	42.2	40.3	40.3	40.9333	1.09697		415000	19.1	25.3	25.3	23.2333	3.57957		415000	25.4	23.5	23.5	24.1333	1.09697
	415500	35.1	27.7	27.7	30.1667	4.27239		415500	49.8	47.8	42.2	46.6	3.93954		415500	24.7	34.5	34.5	31.2333	5.65803		415500	24.3	22.9	22.9	23.3667	0.80829
	416000	31.9	30	30	30.6333	1.09697		416000	38	38	34.1	36.7	2.25167		416000	19.2	37.7	37.7	31.5333	10.681		416000	39.1	39.1	39.1	39.1	0
	416500	41	31.6	31.6	34.7333	5.42709		416500	45.2	45.2	41.5	43.9667	2.1362		416500	24.1	27.8	27.8	26.5667	2.1362		416500	32.7	27	27	28.9	3.2909
	417000	32.1	25.3	25.3	27.5667	3.92598		417000	43.7	40	36.4	40.0333	3.65011		417000	20.8	41.8	38	33.5333	11.1899		417000	33.9	31.2	30.1	31.7333	1.95533
	417500	35.5	29.9	29.9	31.7667	3.23316		417500	41.3	34.6	29.4	35.1	5.96574		417500	22.4	28.3	28.3	26.3333	3.40637		417500	40.8	28.3	26.6	31.9	7.75435
	418000	41.7	31.6	31.6	34.9667	5.83124		418000	36.2	34.4	30.5	33.7	2.91376		418000	25.7	28.7	26.8	27.0667	1.51767		418000	44.8	43.1	43.1	43.6667	0.981495
	418500	39.8	28.4	28.4	32.2	6.58179		418500	35.1	33.2	28.3	32.2	3.50856		418500	21.8	37	31.7	30.1667	7.71514		418500	27.6	27.6	27.6	27.6	4.35117e-15
	419000	36.9	29.5	29.5	31.9667	4.27239		419000	36.4	33.1	31.4	33.6333	2.54231		419000	27.3	25.3	25.3	25.9667	1.1547		419000	29.5	27.2	27.2	27.9667	1.32791
	419500	45.7	32.5	30.8	36.3333	8.15618		419500	54.3	54.3	52.4	53.6667	1.09697		419500	26.8	24.7	24.7	25.4	1.21244		419500	41	35.1	35.1	37.0667	3.40637
	420000	41.7	29.7	27.7	33.0333	7.57188		420000	39.4	39.4	35.6	38.1333	2.19393		420000	28	30.6	28.7	29.1	1.34536		420000	31.5	27.9	27.9	29.1	2.07846
	420500	43.1	28.7	28.7	33.5	8.31384		420500	51.8	47.8	45.9	48.5	3.01164		420500	27	31.1	31.1	29.7333	2.36714		420500	38.6	31.3	31.3	33.7333	4.21466
	421000	37.6	25.7	25.7	29.6667	6.87047		421000	51.8	49.8	45.9	49.1667	3.00056		421000	30.6	26.1	26.1	27.6	2.59808		421000	25.2	21.6	21.6	22.8	2.07846
	421500	48.8	28.9	28.9	35.5333	11.4893		421500	45.2	41.7	37.9	41.6	3.65103		421500	16.8	21.1	19.3	19.0667	2.15948		421500	31.9	30	30	30.6333	1.09697
	422000	40.2	34.5	34.5	36.4	3.2909		422000	43.1	41.2	32.6	38.9667	5.59494		422000	20	26.5	24.7	23.7333	3.35609		422000	26	22.6	22.6	23.7333	1.96299
	422500	44.4	34.7	34.7	37.9333	5.6003		422500	41.8	41.8	34.6	39.4	4.15692		422500	35.6	34.8	34.8	35.0667	0.46188		422500	31.7	31.7	31.7	31.7	0
	423000	40	29.6	29.6	33.0667	6.00444		423000	39.7	39.7	37.7	39.0333	1.1547		423000	28.4	21.8	21.8	24	3.81051		423000	22.9	19	19	20.3	2.25167
	423500	39.8	35.3	35.3	36.8	2.59808		423500	44.4	41	37.6	41	3.4		423500	18	27	27	24	5.19615		423500	31.1	29.1	27.2	29.1333	1.95021
	424000	44.4	27.8	27.8	33.3333	9.58401		424000	41.5	38	34.6	38.0333	3.45012		424000	20.1	23.6	21.8	21.8333	1.75024		424000	31.5	26	25.1	27.5333	3.46458
	424500	38.9	31.1	31.1	33.7	4.50333		424500	44.8	42.9	41	42.9	1.9		424500	27.9	28.4	28.4	28.2333	0.288675		424500	29.5	29.5	29.5	29.5	0
	425000	38.6	28.7	28.7	32	5.71577		425000	49.5	43.9	43.9	45.7667	3.23316		425000	20.8	28.6	27	25.4667	4.11987		425000	23	20	20	21	1.73205
	425500	41.8	33	33	35.9333	5.08068		425500	48.3	46.5	44.4	46.4	1.95192		425500	22.2	42.4	39.1	34.5667	10.8362		425500	41.7	30.4	30.4	34.1667	6.52406
	426000	35.8	25.6	25.6	29	5.88897		426000	44.2	38.5	37.3	40	3.68646		426000	13	26.3	26.3	21.8667	7.67876		426000	41.8	36.8	36.8	38.4667	2.88675
	426500	38.3	27.2	27.2	30.9	6.40859		426500	50.8	46.9	42.7	46.8	4.05093		426500	15.5	35.5	35.5	28.8333	11.547		426500	26.1	18.6	18.6	21.1	4.33013
	427000	35.1	21.9	21.9	26.3	7.62102		427000	55.6	51.5	45.7	50.9333	4.97427		427000	13.3	20.5	20.5	18.1	4.15692		427000	30.1	24.4	24.4	26.3	3.2909
	427500	41.7	22.5	22.5	28.9	11.0851		427500	49.3	49.3	45.7	48.1	2.07846		427500	21.3	24.7	22.8	22.9333	1.70392		427500	35.1	26.3	26.3	29.2333	5.08068
	428000	34.2	27	27	29.4	4.15692		428000	54.1	52.1	50.3	52.1667	1.90088		428000	29.8	32.6	32.6	31.6667	1.61658		428000	26.2	24.5	24.5	25.0667	0.981495
	428500	42.2	25.4	23.6	30.4	10.2587		428500	64.1	58.1	58.1	60.1	3.4641		428500	22	26.6	26.6	25.0667	2.65581		428500	30.2	25.1	25.1	26.8	2.94449
	429000	40.7	30	30	33.5667	6.17765		429000	56.8	56.8	45.2	52.9333	6.69726		429000	23.4	32.7	32.7	29.6	5.36936		429000	16.8	13.8	13.8	14.8	1.73205
	429500	48.5	32.1	32.1	37.5667	9.46854		429500	61	61	45.7	55.9	8.83346		429500	22.7	31.3	29.7	27.9	4.57384		429500	33	29.3	29.3	30.5333	2.1362
	430000	44.2	29.8	29.8	34.6	8.31384		430000	46.9	46.9	34.8	42.8667	6.98594		430000	25.6	30.8	30.8	29.0667	3.00222		430000	25.1	25.1	25.1	25.1	4.35117e-15
	430500	35.8	25.1	25.1	28.6667	6.17765		430500	56.2	52.4	33.8	47.4667	11.9872		430500	25.5	31.6	31.6	29.5667	3.52184		430500	31.8	24.4	24.4	26.8667	4.27239
	431000	44.2	29.5	29.5	34.4	8.48705		431000	42.7	42.7	34.1	39.8333	4.96521		431000	19.3	38.5	38.5	32.1	11.0851		431000	27.5	22.3	22.3	24.0333	3.00222
	431500	37.7	26	26	29.9	6.755		431500	41.2	35.7	28.6	35.1667	6.31691		431500	28.2	31.6	31.6	30.4667	1.96299		431500	27.8	21.9	21.9	23.8667	3.40637
	432000	52.1	41	41	44.7	6.40859		432000	45.7	45.7	43.7	45.0333	1.1547		432000	17.6	25.1	25.1	22.6	4.33013		432000	24.4	24.4	24.4	24.4	4.35117e-15
	432500	44.2	28.2	28.2	33.5333	9.2376		432500	41.3	39.4	35.6	38.7667	2.9023		432500	34.4	32.1	30.3	32.2667	2.05508		432500	31.7	31.7	31.7	31.7	0
	433000	26.7	20.9	20.9	22.8333	3.34863		433000	43.9	43.9	36.2	41.3333	4.4456		433000	27.9	38.9	36.9	34.5667	5.85947		433000	20.3	20.3	20.3	20.3	0
	433500	42.7	29.2	29.2	33.7	7.79423		433500	38.3	31.1	23.8	31.0667	7.25006		433500	28.2	43.7	41.8	37.9	8.45399		433500	43.3	39.4	39.4	40.7	2.25167
	434000	49	37	37	41	6.9282		434000	29.7	29.7	25.7	28.3667	2.3094		434000	22.9	39.1	39.1	33.7	9.35307		434000	35.5	28.4	28.4	30.7667	4.09919
	434500	43.5	29	29	33.8333	8.37158		434500	35.1	35.1	33.2	34.4667	1.09697		434500	25.2	26	22.3	24.5	1.94679		434500	27.9	22.6	22.6	24.3667	3.05996
	435000	42.4	30.1	30.1	34.2	7.10141		435000	49	43.3	37.6	43.3	5.7		435000	26.2	27.1	27.1	26.8	0.519615		435000	44.2	36.1	36.1	38.8	4.67654
	435500	37.3	20.4	20.4	26.0333	9.75722		435500	33.1	27.2	25.3	28.5333	4.06735		435500	26.5	39.2	37.3	34.3333	6.85006		435500	32.2	26.8	26.8	28.6	3.11769
	436000	36.4	30.9	30.9	32.7333	3.17543		436000	40.7	31.4	27.9	33.3333	6.61539		436000	28.4	33	31.2	30.8667	2.31805		436000	23.5	21.6	21.6	22.2333	1.09697
	436500	33.1	26	26	28.3667	4.09919		436500	40.3	38.3	34.5	37.7	2.94618		436500	25.3	28.4	28.4	27.3667	1.78979		436500	35.3	31.7	31.7	32.9	2.07846
	437000	34.1	23.8	23.8	27.2333	5.94671		437000	35.8	30.2	24.8	30.2667	5.5003		437000	26.8	37.9	36.1	33.6	5.95735		437000	21.1	14.7	14.7	16.8333	3.69504
	437500	36.1	32.4	32.4	33.6333	2.1362		437500	45.9	40.2	38.3	41.4667	3.95517		437500	25.8	35.1	35.1	32	5.36936		437500	34.4	28.4	28.4	30.4	3.4641
	438000	37.6	29.2	29.2	32	4.84974		438000	33.8	31.9	22.5	29.4	6.05062		438000	22.9	37	37	32.3	8.14064		438000	33.1	27.6	27.6	29.4333	3.17543
	438500	36.8	27.5	27.5	30.6	5.36936		438500	39.5	39.5	37.7	38.9	1.03923		438500	25.6	38.5	38.5	34.2	7.44782		438500	20.8	19	19	19.6	1.03923
	439000	40.7	34.4	34.4	36.5	3.63731		439000	41	35.3	31.6	35.9667	4.73533		439000	23.8	36.9	36.9	32.5333	7.56329		439000	25.7	24	24	24.5667	0.981495
	439500	31.4	25.6	23.9	26.9667	3.93234		439500	38.3	32.5	32.5	34.4333	3.34863		439500	30.7	29.9	29.9	30.1667	0.46188		439500	28.8	24.9	24.9	26.2	2.25167
	440000	32.4	21.8	21.8	25.3333	6.11991		440000	45.7	37.7	33.8	39.0667	6.06658		440000	32.6	35	35	34.2	1.38564		440000	32.6	28	28	29.5333	2.65581
	440500	42.2	28.2	28.2	32.8667	8.0829		440500	56.5	50.5	46.7	51.2333	4.94099		440500	21.6	32.5	32.5	28.8667	6.29312		440500	33.8	24.3	24.3	27.4667	5.48483
	441000	40.8	27.8	27.8	32.1333	7.50555		441000	47.4	41.8	35.1	41.4333	6.15819		441000	24.1	39.2	39.2	34.1667	8.71799		441000	23.9	21.9	21.9	22.5667	1.1547
	441500	35	28.9	28.9	30.9333	3.52184		441500	44.2	40	31.6	38.6	6.41561		441500	17.1	22.7	22.7	20.8333	3.23316		441500	32.8	31	29.2	31	1.8
	442000	28.7	21.5	21.5	23.9	4.15692		442000	42	40.2	36.4	39.5333	2.8589		442000	26.2	28.1	28.1	27.4667	1.09697		442000	27.7	25.8	25.8	26.4333	1.09697
	442500	37	26.5	26.5	30	6.06218		442500	48.8	44.8	42.9	45.5	3.01164		442500	22.7	31	31	28.2333	4.79201		442500	31	29.2	29.2	29.8	1.03923
	443000	44.4	30	30	34.8	8.31384		443000	42.6	35.1	31	36.2333	5.88246		443000	25.1	22.2	22.2	23.1667	1.67432		443000	25.4	23.8	23.8	24.3333	0.92376
	443500	52.9	32.2	32.2	39.1	11.9512		443500	48.1	46.3	38.5	44.3	5.10294		443500	27.1	32.3	32.3	30.5667	3.00222		443500	25.6	25.6	23.9	25.0333	0.981495
	444000	39.7	24.2	24.2	29.3667	8.94893		444000	40.5	36.9	35.2	37.5333	2.70617		444000	32.5	35.1	29.2	32.2667	2.95691		444000	26.9	23.4	21.8	24.0333	2.60832
	444500	49.3	29.5	29.5	36.1	11.4315		444500	37	35.1	29.6	33.9	3.84318		444500	19.6	33.9	33.9	29.1333	8.25611		444500	29	25.3	23.5	25.9333	2.80416
	445000	35.1	23.1	23.1	27.1	6.9282		445000	36.9	36.9	33.2	35.6667	2.1362		445000	21.6	23.8	23.8	23.0667	1.27017		445000	23.4	21.6	21.6	22.2	1.03923
	445500	39.4	22.7	22.7	28.2667	9.64175		445500	42	38.2	34.4	38.2	3.8		445500	14.9	38.6	38.6	30.7	13.6832		445500	28.5	28.5	28.5	28.5	0
	446000	41.3	20.3	20.3	27.3	12.1244		446000	43.3	39.4	37.5	40.0667	2.95691		446000	29.2	32.1	32.1	31.1333	1.67432		446000	25	23.4	23.4	23.9333	0.92376
	446500	36.9	25.3	25.3	29.1667	6.69726		446500	46.1	46.1	44.2	45.4667	1.09697		446500	39.8	35.7	31.9	35.8	3.95095		446500	42.6	38.8	38.8	40.0667	2.19393
	447000	37.3	26.1	26.1	29.8333	6.46632		447000	39.7	39.7	32.2	37.2	4.33013		447000	16.9	33.2	33.2	27.7667	9.41081		447000	31	29.9	28.1	29.6667	1.46401
	447500	37	35.1	35.1	35.7333	1.09697		447500	37	33.3	27.8	32.7	4.62925		447500	31.3	35	35	33.7667	2.1362		447500	28.2	20.7	20.7	23.2	4.33013
	448000	38.8	29.1	29.1	32.3333	5.6003		448000	35.7	31.9	27	31.5333	4.36157		448000	27.2	27.2	22.1	25.5	2.94449		448000	37	33.3	33.3	34.5333	2.1362
	448500	34.2	21.3	21.3	25.6	7.44782		448500	46.5	46.5	44.6	45.8667	1.09697		448500	31	35.8	35.8	34.2	2.77128		448500	38.9	33.7	31.8	34.8	3.6756
	449000	38.6	27	27	30.8667	6.69726		449000	40.5	40.5	34.7	38.5667	3.34863		449000	35.5	33.3	31.4	33.4	2.05183		449000	42.7	33.1	33.1	36.3	5.54256
	449500	43.7	26.5	26.5	32.2333	9.93042		449500	31.7	31.7	29.9	31.1	1.03923		449500	29.1	33.1	33.1	31.7667	2.3094		449500	35	31.1	31.1	32.4	2.25167
	450000	48.3	29	29	35.4333	11.1429		450000	36.2	36.2	32.9	35.1	1.90526		450000	41.7	41.8	41.8	41.7667	0.057735		450000	28.5	26.7	26.7	27.3	1.03923
	450500	35.7	26.8	26.8	29.7667	5.13842		450500	40.5	38.6	36.6	38.5667	1.95021		450500	31.3	24.4	24.4	26.7	3.98372		450500	29.2	27.2	27.2	27.8667	1.1547
	451000	41.5	28.8	28.8	33.0333	7.33235		451000	40.8	36.9	35	37.5667	2.95691		451000	33.2	41.2	39.2	37.8667	4.16333		451000	35.5	33.6	33.6	34.2333	1.09697
	451500	40.2	19.4	19.4	26.3333	12.0089		451500	37.2	33.4	29.8	33.4667	3.70045		451500	38.5	25.6	25.6	29.9	7.44782		451500	38	36.4	36.4	36.9333	0.92376
	452000	39.1	27.2	27.2	31.1667	6.87047		452000	38.2	34.7	31.3	34.7333	3.45012		452000	32.9	37.9	37.9	36.2333	2.88675		452000	34.5	34.5	32.6	33.8667	1.09697
	452500	42.9	29.2	29.2	33.7667	7.9097		452500	34.4	32.5	30.6	32.5	1.9		452500	28.9	38.3	36.4	34.5333	4.97024		452500	37.9	37.9	37.9	37.9	0
	453000	38	28.5	28.5	31.6667	5.48483		453000	38.6	36.8	33.3	36.2333	2.69506		453000	19.5	39.8	35.8	31.7	10.7531		453000	42.4	38.8	35.2	38.8	3.6
	453500	34.5	20.7	20.7	25.3	7.96743		453500	43.7	37.7	34	38.4667	4.89524		453500	38.3	24.9	24.9	29.3667	7.73649		453500	25.2	25.2	19.8	23.4	3.11769
	454000	35.1	24.8	24.8	28.2333	5.94671		454000	40.2	38.2	36.4	38.2667	1.90088		454000	25.8	43.9	43.9	37.8667	10.45		454000	28.8	27	27	27.6	1.03923
	454500	39.7	23.6	23.6	28.9667	9.29534		454500	37.3	35.3	31.3	34.6333	3.05505		454500	34.6	31	31	32.2	2.07846		454500	46.3	42.6	40.5	43.1333	2.93655
	455000	35.6	21.3	21.3	26.0667	8.25611		455000	43.1	41.3	39.4	41.2667	1.85023		455000	40.3	33	28.2	33.8333	6.09289		455000	32.3	32.3	32.3	32.3	0
	455500	45.9	32.5	32.5	36.9667	7.73649		455500	41.2	37.5	35.6	38.1	2.84781		455500	39.4	29.8	27.9	32.3667	6.16468		455500	31.6	23.7	23.7	26.3333	4.56107
	456000	44.8	30.1	30.1	35	8.48705		456000	39.1	37.2	33.2	36.5	3.01164		456000	29.3	35.8	35.8	33.6333	3.75278		456000	36.1	36.1	36.1	36.1	0
	456500	31	19.2	19.2	23.1333	6.81273		456500	38.5	32.7	30.8	34	4.01123		456500	32.4	31.7	29.9	31.3333	1.2897		456500	27.8	27.8	27.8	27.8	0
	457000	41.3	22.7	22.7	28.9	10.7387		457000	49.8	41	37.3	42.7	6.42106		457000	40.8	42.2	39.5	40.8333	1.35031		457000	30.1	28.2	28.2	28.8333	1.09697
	457500	36	25.1	25.1	28.7333	6.29312		457500	49.3	40.5	35.3	41.7	7.07672		457500	23.1	34	30.3	29.1333	5.54286		457500	39.5	38.3	38.3	38.7	0.69282
	458000	45.2	31.3	31.3	35.9333	8.02517		458000	38.6	36.8	34.7	36.7	1.95192		458000	24	33.2	33.2	30.1333	5.31162		458000	39.2	33.6	31.6	34.8	3.93954
	458500	37.6	23.9	23.9	28.4667	7.9097		458500	39.7	34	30.3	34.6667	4.73533		458500	19.2	29.9	29.9	26.3333	6.17765		458500	34.2	29.9	29.9	31.3333	2.48261
	459000	38.9	34.1	34.1	35.7	2.77128		459000	36.1	32.7	31	33.2667	2.59679		459000	32.6	33.8	33.8	33.4	0.69282		459000	23.3	19.9	19.5	20.9	2.08806
	459500	39.1	31.3	31.3	33.9	4.50333		459500	38.2	34.7	31.3	34.7333	3.45012		459500	28.7	27.2	27.2	27.7	0.866025		459500	27.2	27.2	25.5	26.6333	0.981495
	460000	39.8	30.3	30.3	33.4667	5.48483		460000	40.7	35.1	33.3	36.3667	3.85919		460000	29.2	27.9	24.4	27.1667	2.48261		460000	29.4	24.2	24.2	25.9333	3.00222
	460500	39.7	27.3	27.3	31.4333	7.15914		460500	29.9	28	26.2	28.0333	1.85023		460500	37.9	22.3	20	26.7333	9.73875		460500	39.8	30.8	29	33.2	5.78619
	461000	35.8	32.2	32.2	33.4	2.07846		461000	29.2	27.4	21.9	26.1667	3.80307		461000	26.7	22.9	22.9	24.1667	2.19393		461000	39.1	33.4	33.4	35.3	3.2909
	461500	38.9	29.2	29.2	32.4333	5.6003		461500	41.2	33.7	28	34.3	6.62042		461500	31.5	25.6	22.2	26.4333	4.70567		461500	30.1	28.2	28.2	28.8333	1.09697
	462000	41.3	25.1	25.1	30.5	9.35307		462000	27.1	25.5	25.4	26	0.953939		462000	25.4	21.2	21.2	22.6	2.42487		462000	28.5	24.9	24.9	26.1	2.07846
	462500	39.8	28.4	28.4	32.2	6.58179		462500	32.5	30.6	26.7	29.9333	2.95691		462500	25.1	39.2	37.3	33.8667	7.65136		462500	29.9	28.2	28.2	28.7667	0.981495
	463000	45	28.2	28.2	33.8	9.69948		463000	36.4	30.6	28.7	31.9	4.01123		463000	20.9	35.6	35.6	30.7	8.48705		463000	33.2	29.6	27.7	30.1667	2.79344
	463500	35.3	23.9	23.9	27.7	6.58179		463500	42.6	40.5	38.6	40.5667	2.00083		463500	29	26.5	26.5	27.3333	1.44338		463500	36.9	35	35	35.6333	1.09697
	464000	40.7	28.2	28.2	32.3667	7.21688		464000	40.2	36.1	32.5	36.2667	3.8527		464000	24.7	30.2	30.2	28.3667	3.17543		464000	31.5	29.9	28.1	29.8333	1.70098
	464500	35	25.3	25.3	28.5333	5.6003		464500	43.9	40.3	36	40.0667	3.95517		464500	33.3	33.7	33.7	33.5667	0.23094		464500	30.1	26.8	26.8	27.9	1.90526
	465000	44.8	27.2	27.2	33.0667	10.1614		465000	32.3	28.5	22.8	27.8667	4.78156		465000	56.5	24.1	24.1	34.9	18.7061		465000	41.7	39.8	39.8	40.4333	1.09697
	465500	41.7	28.7	28.7	33.0333	7.50555		465500	40.5	38.6	38.6	39.2333	1.09697		465500	31.3	32.7	30.8	31.6	0.984886		465500	34.6	29.7	29.7	31.3333	2.82902
	466000	46.1	30.8	30.8	35.9	8.83346		466000	41.5	39.7	39.7	40.3	1.03923		466000	26.7	36.2	34.4	32.4333	5.04612		466000	19.5	17.8	17.8	18.3667	0.981495
	466500	32.5	23.4	23.4	26.4333	5.25389		466500	44.1	40.2	38.3	40.8667	2.95691		466500	31.3	23.2	23.2	25.9	4.67654		466500	29.6	27.6	25.6	27.6	2
	467000	40.5	29.9	29.9	33.4333	6.11991		467000	48.8	48.8	48.8	48.8	8.70234e-15		467000	26.6	24.5	24.5	25.2	1.21244		467000	36.9	33.2	33.2	34.4333	2.1362
	467500	39.2	21.6	19.6	26.8	10.7852		467500	34.7	34.7	31.1	33.5	2.07846		467500	24.9	33	33	30.3	4.67654		467500	31	31	31	31	0
	468000	33.7	27	27	29.2333	3.86825		468000	36.6	33.1	30.7	33.4667	2.96704		468000	23.4	27.3	27.3	26	2.25167		468000	27.1	25.1	25.1	25.7667	1.1547
	468500	38.6	33.3	33.3	35.0667	3.05996		468500	36.4	32.5	32.5	33.8	2.25167		468500	22.7	35.7	35.7	31.3667	7.50555		468500	33.2	28.5	28.5	30.0667	2.71355
	469000	42.6	25.1	25.1	30.9333	10.1036		469000	31.3	29.2	23.4	27.9667	4.09186		469000	18.1	26.9	26.9	23.9667	5.08068		469000	37	37	37	37	0
	469500	30.7	21.6	21.6	24.6333	5.25389		469500	37.5	37.5	37.5	37.5	0		469500	24.4	28.4	26.7	26.5	2.00749		469500	30	28.2	28.2	28.8	1.03923
	470000	47.6	32.5	32.5	37.5333	8.71799		470000	42.2	34.8	33	36.6667	4.87579		470000	36.1	33.6	33.6	34.4333	1.44338		470000	22.9	21.2	21.2	21.7667	0.981495
	470500	45.9	28.5	28.5	34.3	10.0459		470500	35	28.3	25.2	29.5	5.00899		470500	27.8	30.6	27.4	28.6	1.74356		470500	29.4	24.9	24.9	26.4	2.59808
	471000	40.8	27.2	27.2	31.7333	7.85196		471000	35.8	34.1	34.1	34.6667	0.981495		471000	21.4	27.3	25.5	24.7333	3.02379		471000	33.6	31.6	31.6	32.2667	1.1547
	471500	39.4	25	25	29.8	8.31384		471500	36.8	34.8	34.8	35.4667	1.1547		471500	25.4	41	41	35.8	9.00666		471500	31.5	29.8	29.8	30.3667	0.981495
	472000	43.9	34.2	34.2	37.4333	5.6003		472000	33.8	30	28.2	30.6667	2.8589		472000	27.1	36	33.6	32.2333	4.60471		472000	33.8	29.9	29.9	31.2	2.25167
	472500	43.3	23.9	23.9	30.3667	11.2006		472500	40.7	36	32.4	36.3667	4.16213		472500	35.7	30.7	28.7	31.7	3.60555		472500	37.5	37.5	33.9	36.3	2.07846
	473000	36.9	31.1	31.1	33.0333	3.34863		473000	33.9	30.2	26.4	30.1667	3.75011		473000	21.2	19.2	19.2	19.8667	1.1547		473000	34.7	32.8	28.9	32.1333	2.95691
	473500	35.3	29.8	27.9	31	3.84318		473500	40.8	33.7	30.5	35	5.27162		473500	23.6	32.6	32.6	29.6	5.19615		473500	39.4	37.3	37.3	38	1.21244
	474000	35.2	27.4	27.4	30	4.50333		474000	37.3	33.6	31.7	34.2	2.84781		474000	18.5	40	40	32.8333	12.413		474000	47.2	39.7	33.9	40.2667	6.66808
	474500	29.7	20.7	20.7	23.7	5.19615		474500	39.7	37.7	37.7	38.3667	1.1547		474500	36.8	34.5	34.5	35.2667	1.32791		474500	36.4	34.5	34.5	35.1333	1.09697
	475000	37.9	25.2	25.2	29.4333	7.33235		475000	42.7	29.9	29.9	34.1667	7.39008		475000	21.5	31.1	31.1	27.9	5.54256		475000	24.3	24.3	24.3	24.3	0
	475500	38.9	29.2	29.2	32.4333	5.6003		475500	34.5	29.3	27.5	30.4333	3.63501		475500	34.6	35.7	33.8	34.7	0.953939		475500	29.9	29.9	26.5	28.7667	1.96299
	476000	41	24.6	24.6	30.0667	9.46854		476000	39.8	39.8	31	36.8667	5.08068		476000	39.2	40.5	37.2	38.9667	1.66233		476000	45.2	43.5	43.5	44.0667	0.981495
	476500	41.3	29.5	29.5	33.4333	6.81273		476500	52.9	50.8	42.9	48.8667	5.27289		476500	27.8	29.2	29.2	28.7333	0.80829		476500	21.6	21.6	19.6	20.9333	1.1547
	477000	38.5	22.2	22.2	27.6333	9.41081		477000	55.9	49.8	45.7	50.4667	5.13258		477000	28.9	29.9	29.9	29.5667	0.57735		477000	30.9	27.9	27.9	28.9	1.73205
	477500	36.6	27	27	30.2	5.54256		477500	45.2	42.7	40.8	42.9	2.20681		477500	29	38.3	34.5	33.9333	4.67582		477500	27.5	23.1	23.1	24.5667	2.54034
	478000	39.2	28.2	28.2	31.8667	6.35085		478000	46.5	42.7	42.7	43.9667	2.19393		478000	28.9	25.6	23.8	26.1	2.5865		478000	38.3	33.1	33.1	34.8333	3.00222
	478500	39.8	27.2	27.2	31.4	7.27461		478500	47.8	46.1	44.1	46	1.85203		478500	31.9	28.9	28.9	29.9	1.73205		478500	31.8	31.8	31.8	31.8	0
	479000	35.5	27.9	27.9	30.4333	4.38786		479000	43.9	42	38.2	41.3667	2.9023		479000	23.6	34	32.2	29.9333	5.55818		479000	45.2	38.6	36.8	40.2	4.42267
	479500	47.6	34.6	34.6	38.9333	7.50555		479500	41.7	41.7	40.3	41.2333	0.80829		479500	26.2	26.7	24.8	25.9	0.984886		479500	38	28.7	28.7	31.8	5.36936
	480000	44.1	30.7	30.7	35.1667	7.73649		480000	38.2	36.4	28.7	34.4333	5.04612		480000	25.2	32.5	30.6	29.4333	3.78726		480000	35.6	31.6	31.6	32.9333	2.3094
	480500	44.4	31.2	31.2	35.6	7.62102		480500	52.9	51.3	46.1	50.1	3.55528		480500	27.3	34.4	31.1	30.9333	3.55293		480500	27.9	24.2	20.4	24.1667	3.75011
	481000	35.8	21.2	21.2	26.0667	8.42931		481000	49	49	47.2	48.4	1.03923		481000	25.3	33.1	31.2	29.8667	4.06735		481000	45	39.4	39.4	41.2667	3.23316
	481500	41.2	26.9	26.9	31.6667	8.25611		481500	52.9	51	49	50.9667	1.95021		481500	28.6	32.9	32.9	31.4667	2.48261		481500	39.7	35.8	35.8	37.1	2.25167
	482000	35.7	23.8	23.8	27.7667	6.87047		482000	42.9	37.3	33.6	37.9333	4.68224		482000	31.3	21.8	21.8	24.9667	5.48483		482000	42	33.9	33.9	36.6	4.67654
	482500	32.9	25.2	25.2	27.7667	4.4456		482500	55.6	50.8	47.2	51.2	4.21426		482500	24	28.3	28.3	26.8667	2.48261		482500	34.8	33.6	31.7	33.3667	1.56312
	483000	38.3	28.7	28.7	31.9	5.54256		483000	52.4	43.1	31.8	42.4333	10.3162		483000	32.9	34.7	34.7	34.1	1.03923		483000	37.6	33.7	33.7	35	2.25167
	483500	32.5	23.9	23.9	26.7667	4.96521		483500	37.5	35.6	30	34.3667	3.89915		483500	29.3	42.2	40.3	37.2667	6.96443		483500	32.4	25.1	25.1	27.5333	4.21466
	484000	38.9	23.7	23.7	28.7667	8.77572		484000	42.2	42.2	40.3	41.5667	1.09697		484000	19.8	24.3	24.3	22.8	2.59808		484000	31.8	28.5	28.5	29.6	1.90526
	484500	46.1	32.7	30.8	36.5333	8.33926		484500	40.7	38.8	36.9	38.8	1.9		484500	30.3	37.7	37.7	35.2333	4.27239		484500	29.9	29.9	29.9	29.9	4.35117e-15
	485000	41	29.5	28.4	32.9667	6.97878		485000	28.3	28.3	20.4	25.6667	4.56107		485000	19.6	29.7	29.7	26.3333	5.83124		485000	35.7	34	34	34.5667	0.981495
	485500	39.4	31.5	31.5	34.1333	4.56107		485500	41.2	39.2	31.7	37.3667	5.00833		485500	22.8	31.5	31.5	28.6	5.02295		485500	31.9	31.9	31.9	31.9	4.35117e-15
	486000	34.5	26.7	26.7	29.3	4.50333		486000	44.6	40.8	40.8	42.0667	2.19393		486000	22.9	35.7	35.7	31.4333	7.39008		486000	37.2	29.8	29.8	32.2667	4.27239
	486500	44.6	32.5	32.5	36.5333	6.98594		486500	42.7	42.7	33.7	39.7	5.19615		486500	22.5	34.4	30.5	29.1333	6.06658		486500	28.4	28.4	28.4	28.4	4.35117e-15
	487000	35.3	24.8	24.8	28.3	6.06218		487000	42.9	38.9	29.2	37	7.04486		487000	19.5	37.7	34.4	30.5333	9.69656		487000	25.1	23.1	23.1	23.7667	1.1547
	487500	48.5	32.6	32.6	37.9	9.17987		487500	40.3	40.3	39.7	40.1	0.34641		487500	32.6	36.8	36.8	35.4	2.42487		487500	34.1	32.3	32.3	32.9	1.03923
	488000	43.9	30.5	30.5	34.9667	7.73649		488000	33.6	31.7	30	31.7667	1.80093		488000	23.3	26.9	26.9	25.7	2.07846		488000	41	39.1	37.3	39.1333	1.85023
	488500	40	28.7	28.7	32.4667	6.52406		488500	36.5	32.7	25.4	31.5333	5.64122		488500	26.2	15.3	15.3	18.9333	6.29312		488500	43.1	39.4	39.4	40.6333	2.1362
	489000	37.9	24.3	24.3	28.8333	7.85196		489000	51	51	43.1	48.3667	4.56107		489000	25.8	29.9	29.9	28.5333	2.36714		489000	32.5	25.2	23.4	27.0333	4.81906
	489500	47.8	30.6	30.6	36.3333	9.93042		489500	47.8	47.8	42.2	45.9333	3.23316		489500	28	31.8	31.8	30.5333	2.19393		489500	36.8	34.8	34.8	35.4667	1.1547
	490000	39.7	19.6	19.6	26.3	11.6047		490000	47.6	39.7	37.7	41.6667	5.23482		490000	27.5	32.2	30.3	30	2.36432		490000	31.3	27	27	28.4333	2.48261
	490500	44.2	29.5	29.5	34.4	8.48705		490500	33.6	31.8	27	30.8	3.41174		490500	31.5	30.3	28.6	30.1333	1.45717		490500	23.5	23.5	21.6	22.8667	1.09697
	491000	38.9	25.9	25.9	30.2333	7.50555		491000	36.5	31	27.3	31.6	4.62925		491000	17.8	46.7	44.8	36.4333	16.1649		491000	32.9	32.9	31.1	32.3	1.03923
	491500	46.5	26.1	26.1	32.9	11.7779		491500	42.7	40.8	33	38.8333	5.14036		491500	21.3	39.5	37.6	32.8	10.0045		491500	41.7	36	34	37.2333	3.99541
	492000	37.6	26.2	26.2	30	6.58179		492000	46.7	44.8	40.8	44.1	3.01164		492000	21.3	43.1	39.4	34.6	11.6658		492000	41.8	35.8	33.8	37.1333	4.16333
	492500	32.8	23.1	23.1	26.3333	5.6003		492500	48.1	45.2	39.7	44.3333	4.26654		492500	27.7	31.7	31.1	30.1667	2.15716		492500	32.2	31	31	31.4	0.69282
	493000	38.9	27.8	27.8	31.5	6.40859		493000	32.8	27.3	23	27.7	4.91223		493000	21.2	26.5	22.7	23.4667	2.73191		493000	43.3	41.3	41.3	41.9667	1.1547
	493500	38.6	29.2	29.2	32.3333	5.42709		493500	31.4	31.4	29.6	30.8	1.03923		493500	27.6	37.6	37.6	34.2667	5.7735		493500	31.4	31.4	31.4	31.4	4.35117e-15
	494000	42.2	27.2	27.2	32.2	8.66025		494000	31.3	31.3	29.5	30.7	1.03923		494000	33.1	33.7	33.7	33.5	0.34641		494000	37.2	33.4	33.4	34.6667	2.19393
	494500	32.2	24.6	24.6	27.1333	4.38786		494500	46.7	44.6	44.6	45.3	1.21244		494500	22.8	33.1	33.1	29.6667	5.94671		494500	34.1	30.6	30.6	31.7667	2.02073
	495000	39.5	28.7	28.7	32.3	6.23538		495000	37.7	34	32.1	34.6	2.84781		495000	33.1	23.3	23.3	26.5667	5.65803		495000	23.6	21.6	21.6	22.2667	1.1547
	495500	30.2	25.9	25.9	27.3333	2.48261		495500	41	41	38.9	40.3	1.21244		495500	19.6	25.6	25.6	23.6	3.4641		495500	37.9	36.1	34.4	36.1333	1.75024
	496000	40.7	29.5	29.5	33.2333	6.46632		496000	37.2	33.7	28.3	33.0667	4.48367		496000	32.6	31.2	31.2	31.6667	0.80829		496000	29.6	27.7	27.7	28.3333	1.09697
	496500	31.4	19.3	19.3	23.3333	6.98594		496500	49.3	45.5	39.5	44.7667	4.94099		496500	28.9	23.1	21.5	24.5	3.89358		496500	33.7	29.9	29.9	31.1667	2.19393
	497000	36.6	20.9	20.9	26.1333	9.0644		497000	48.5	44.8	44.8	46.0333	2.1362		497000	20	27.2	25.3	24.1667	3.7314		497000	26	24.3	24.3	24.8667	0.981495
	497500	34.2	27	27	29.4	4.15692		497500	38.8	36.9	35	36.9	1.9		497500	31.2	40.3	40.3	37.2667	5.25389		497500	35.8	35.8	34.1	35.2333	0.981495
	498000	38.8	31	31	33.6	4.50333		498000	40.3	36.6	36.6	37.8333	2.1362		498000	38	39.7	34.2	37.3	2.81603		498000	40.2	40.2	40.2	40.2	0
	498500	35.1	29	29	31.0333	3.52184		498500	38.3	38.3	38.3	38.3	0		498500	34.8	40.5	40.5	38.6	3.2909		498500	34.6	34.6	34.6	34.6	0
	499000	40.8	25.9	25.9	30.8667	8.60252		499000	36.4	34.6	29.2	33.4	3.747		499000	26.2	26.7	26.7	26.5333	0.288675		499000	36.4	34.5	34.5	35.1333	1.09697
	499500	31.8	26.2	26.2	28.0667	3.23316		499500	40	40	40	40	0		499500	29.2	36.9	35	33.7	4.01123		499500	36.5	28.8	28.8	31.3667	4.4456
	500000	32.7	22.8	22.8	26.1	5.71577		500000	48.3	46.3	40.5	45.0333	4.05134		500000	30.7	31.4	31.4	31.1667	0.404145		500000	23.4	20.2	20.2	21.2667	1.84752
	500500	39.2	21.6	21.6	27.4667	10.1614		500500	34.8	34.8	29.4	33	3.11769		500500	20.6	22.6	22.6	21.9333	1.1547		500500	24.4	24	24	24.1333	0.23094
	501000	42.6	27.9	27.9	32.8	8.48705		501000	37.9	34.2	27.9	33.3333	5.05602		501000	25.4	30.5	30.5	28.8	2.94449		501000	34.5	31.2	31.2	32.3	1.90526
	501500	38.3	23.8	23.8	28.6333	8.37158		501500	53.2	49.3	47.2	49.9	3.04467		501500	29.8	30.4	30.4	30.2	0.34641		501500	28.9	25.5	23.8	26.0667	2.59679
	502000	33.4	21.8	21.8	25.6667	6.69726		502000	37.7	32.4	29	33.0333	4.38444		502000	31.2	26.8	26.8	28.2667	2.54034		502000	25	22.2	21.6	22.9333	1.81475
	502500	45.5	30.2	27	34.2333	9.88753		502500	35.2	31.5	31.5	32.7333	2.1362		502500	22.2	35.5	31.5	29.7333	6.82373		502500	30.9	29.2	29.2	29.7667	0.981495
	503000	33.7	22.4	19.8	25.3	7.38986		503000	50.5	38.8	38.8	42.7	6.755		503000	18.1	31.2	31.2	26.8333	7.56329		503000	37.5	37.5	37.5	37.5	0
	503500	43.5	35.6	35.6	38.2333	4.56107		503500	40.5	38.5	36.6	38.5333	1.95021		503500	22.6	33.8	31.9	29.4333	5.99361		503500	36.5	33.7	33.7	34.6333	1.61658
	504000	39.7	30.7	30.7	33.7	5.19615		504000	46.1	42.2	40.2	42.8333	3.00056		504000	29.8	42.4	42.4	38.2	7.27461		504000	34.5	30.7	30.7	31.9667	2.19393
	504500	36.8	25.1	25.1	29	6.755		504500	35.2	35.2	29.4	33.2667	3.34863		504500	30.8	33.2	31.4	31.8	1.249		504500	44.2	42.4	36.6	41.0667	3.97157
	505000	47.4	30.3	30.3	36	9.87269		505000	50.8	41	41	44.2667	5.65803		505000	20.9	36.5	36.5	31.3	9.00666		505000	32.9	24.2	24.2	27.1	5.02295
	505500	33.7	23.7	23.7	27.0333	5.7735		505500	50.3	44.4	40.7	45.1333	4.84183		505500	31.6	28.7	28.7	29.6667	1.67432		505500	34.5	34.5	32.9	33.9667	0.92376
	506000	34.5	24.9	24.9	28.1	5.54256		506000	44.4	40.7	31.2	38.7667	6.80906		506000	16.8	35.6	35.6	29.3333	10.8542		506000	32.3	32.3	32.3	32.3	0
	506500	35.7	28.5	28.5	30.9	4.15692		506500	43.3	38.6	33.3	38.4	5.003		506500	21.3	35.3	35.3	30.6333	8.0829		506500	36.4	36.4	36.4	36.4	0
	507000	32.2	22.7	22.7	25.8667	5.48483		507000	25.4	25.4	25.4	25.4	4.35117e-15		507000	15.5	34.4	32.5	27.4667	10.4069		507000	39.1	39.1	39.1	39.1	0
	507500	28.7	23.1	23.1	24.9667	3.23316		507500	36	36	30.2	34.0667	3.34863		507500	22.6	43.3	41.3	35.7333	11.4177		507500	27	25.1	25.1	25.7333	1.09697
	508000	40.3	29.2	29.2	32.9	6.40859		508000	36.4	34.4	34.4	35.0667	1.1547		508000	20	39.7	37.7	32.4667	10.8427		508000	25.3	19.8	19.8	21.6333	3.17543
	508500	42.9	29.7	29.7	34.1	7.62102		508500	38.9	37.2	35.3	37.1333	1.80093		508500	33	29.5	27.5	30	2.78388		508500	23.4	21.6	19.8	21.6	1.8
	509000	27.9	22.3	22.3	24.1667	3.23316		509000	36.5	33	27.8	32.4333	4.37759		509000	27.7	30	30	29.2333	1.32791		509000	29.2	25.1	22.2	25.5	3.5171
	509500	44.2	27.6	27.6	33.1333	9.58401		509500	50.3	42.6	38.8	43.9	5.85918		509500	22.4	34.6	32.8	29.9333	6.58584		509500	32.8	29.3	27.6	29.9	2.65141
	510000	36.6	30.9	30.9	32.8	3.2909		510000	47.8	44.1	42.2	44.7	2.84781		510000	35.1	32.5	30.5	32.7	2.30651		510000	29.4	29.4	29.4	29.4	4.35117e-15
	510500	39.5	26.3	26.3	30.7	7.62102		510500	36.2	32.6	30.8	33.2	2.74955		510500	28.6	24.1	20.7	24.4667	3.96274		510500	43.5	39.7	37.7	40.3	2.94618
	511000	40.3	30.8	30.8	33.9667	5.48483		511000	35	33	29.2	32.4	2.94618		511000	15.9	35.7	33.8	28.4667	10.9244		511000	35.2	31.3	31.3	32.6	2.25167
	511500	40	26.3	26.3	30.8667	7.9097		511500	40.7	40.7	34.8	38.7333	3.40637		511500	22.6	23.1	23.1	22.9333	0.288675		511500	35.8	28.2	28.2	30.7333	4.38786
	512000	48.8	25.5	25.5	33.2667	13.4523		512000	45.2	39.7	34.5	39.8	5.3507		512000	26.6	33.4	33.4	31.1333	3.92598		512000	37.2	35.2	35.2	35.8667	1.1547
	512500	53.8	28.3	28.3	36.8	14.7224		512500	38.9	37	31.5	35.8	3.84318		512500	33.7	33	31.1	32.6	1.34536		512500	28.2	24.2	21.2	24.5333	3.51188
	513000	40.8	31.2	31.2	34.4	5.54256		513000	35.5	31.6	29.9	32.3333	2.87112		513000	27.8	28.5	28.5	28.2667	0.404145		513000	27.8	24.3	22.7	24.9333	2.60832
	513500	35.1	29.2	29.2	31.1667	3.40637		513500	37.5	37.5	37.5	37.5	0		513500	22.6	34.1	32.4	29.7	6.20725		513500	46.5	34.8	34.8	38.7	6.755
	514000	46.5	29.1	29.1	34.9	10.0459		514000	45.2	43.3	35.8	41.4333	4.97024		514000	17.7	25.8	25.8	23.1	4.67654		514000	31.9	28.1	28.1	29.3667	2.19393
	514500	43.3	28.7	28.7	33.5667	8.42931		514500	43.5	43.5	37.7	41.5667	3.34863		514500	21.7	32.1	30.2	28	5.53805		514500	24.9	21.3	21.3	22.5	2.07846
	515000	32.5	26.5	26.5	28.5	3.4641		515000	50.3	48.3	44.6	47.7333	2.89194		515000	28.7	36.6	36.6	33.9667	4.56107		515000	30.1	30.1	28.3	29.5	1.03923
	515500	40.7	28.2	28.2	32.3667	7.21688		515500	40	37.9	36	37.9667	2.00083		515500	17.5	35.7	33.7	28.9667	9.98065		515500	43.3	41.5	39.5	41.4333	1.90088
	516000	38.2	30.5	28.6	32.4333	5.08363		516000	41.5	33.9	32.4	35.9333	4.87887		516000	19.8	35.3	35.3	30.1333	8.94893		516000	27.9	24.4	22.6	24.9667	2.69506
	516500	35.7	25.6	25.6	28.9667	5.83124		516500	40.3	36.6	25.6	34.1667	7.64613		516500	18.1	32.5	32.5	27.7	8.31384		516500	24.6	24.6	22.7	23.9667	1.09697
	517000	37.5	23.8	23.8	28.3667	7.9097		517000	43.5	39.7	32.2	38.4667	5.75007		517000	24.2	27.2	27.2	26.2	1.73205		517000	30.4	25	25	26.8	3.11769
	517500	42.6	32.9	32.9	36.1333	5.6003		517500	34.1	30.4	23.3	29.2667	5.48847		517500	25.8	34.4	34.4	31.5333	4.96521		517500	26.7	25.1	21.7	24.5	2.55343
	518000	37.2	27.9	27.9	31	5.36936		518000	42.6	37.6	32.3	37.5	5.15073		518000	20.8	20.1	20.1	20.3333	0.404145		518000	35.5	33.4	33.4	34.1	1.21244
	518500	29.6	25.6	25.6	26.9333	2.3094		518500	43.1	39.2	37.2	39.8333	3.00056		518500	22.2	36.1	34.2	30.8333	7.5368		518500	40.7	36.9	36.9	38.1667	2.19393
	519000	41.5	28.8	27	32.4333	7.90337		519000	43.1	39.2	36.2	39.5	3.45977		519000	29.7	39.8	39.8	36.4333	5.83124		519000	39.8	34.4	34.4	36.2	3.11769
	519500	42.9	29.3	29.3	33.8333	7.85196		519500	48.8	43.7	41.7	44.7333	3.66106		519500	23.4	33.2	33.2	29.9333	5.65803		519500	30.9	30.9	30.9	30.9	4.35117e-15
	520000	37.3	31.7	31.7	33.5667	3.23316		520000	42	36.6	32.9	37.1667	4.57639		520000	32.7	33.3	33.3	33.1	0.34641		520000	36.4	32.6	30.7	33.2333	2.9023
	520500	34.1	19.7	19.7	24.5	8.31384		520500	44.6	42.7	40.8	42.7	1.9		520500	12.9	29.6	29.6	24.0333	9.64175		520500	26	26	26	26	0
	521000	36.1	25.3	25.3	28.9	6.23538		521000	47.6	47.6	42	45.7333	3.23316		521000	16.5	30.4	30.4	25.7667	8.02517		521000	24.7	22.6	22.6	23.3	1.21244
	521500	36.9	29	29	31.6333	4.56107		521500	39.1	35.2	32.6	35.6333	3.27159		521500	21.2	39.8	38	33	10.2587		521500	35.3	33.7	33.7	34.2333	0.92376
	522000	40.2	32.6	32.6	35.1333	4.38786		522000	42.2	40.3	36.5	39.6667	2.9023		522000	32.2	31.3	27.3	30.2667	2.60832		522000	26.3	20.7	20.7	22.5667	3.23316
	522500	34.8	24.6	24.6	28	5.88897		522500	39.5	39.5	39.5	39.5	0		522500	19.1	29.7	29.2	26	5.9808		522500	30	24.7	22.9	25.8667	3.69098
	523000	44.2	27	27	32.7333	9.93042		523000	33.7	33.7	30.1	32.5	2.07846		523000	19.5	28.7	28.7	25.6333	5.31162		523000	29.6	28.6	27.4	28.5333	1.10151
	523500	32.9	21.7	21.7	25.4333	6.46632		523500	43.3	43.3	38.5	41.7	2.77128		523500	12.6	28.3	28.3	23.0667	9.0644		523500	44.1	42	42	42.7	1.21244
	524000	36	28.3	28.3	30.8667	4.4456		524000	29.8	27.9	24.2	27.3	2.84781		524000	22.9	28.8	28.8	26.8333	3.40637		524000	27.1	23.5	23.5	24.7	2.07846
	524500	37.2	24.2	24.2	28.5333	7.50555		524500	47.6	42	35.5	41.7	6.05558		524500	32.6	37.3	35.5	35.1333	2.37136		524500	27.9	24.2	24.2	25.4333	2.1362
	525000	42.9	32.1	32.1	35.7	6.23538		525000	40.7	40.7	36.8	39.4	2.25167		525000	32.6	34.8	33	33.4667	1.17189		525000	23.9	23.9	22	23.2667	1.09697
	525500	38.6	28	28	31.5333	6.11991		525500	55.9	50	39.4	48.4333	8.36082		525500	24.3	35.7	35.7	31.9	6.58179		525500	22.9	19	19	20.3	2.25167
	526000	46.9	31.3	31.3	36.5	9.00666		526000	39.2	39.2	28	35.4667	6.46632		526000	20.1	36.5	34.6	30.4	8.97051		526000	29.5	27.7	27.7	28.3	1.03923
	526500	44.6	30	30	34.8667	8.42931		526500	41.7	39.7	33.3	38.2333	4.38786		526500	19.4	42	42	34.4667	13.0481		526500	29.9	29.9	29.9	29.9	4.35117e-15
	527000	35.3	26	26	29.1	5.36936		527000	36	35.1	31.3	34.1333	2.49466		527000	17.7	25.3	25.3	22.7667	4.38786		527000	30.7	27	27	28.2333	2.1362
	527500	34.7	29.2	29.2	31.0333	3.17543		527500	39.2	37.3	31.7	36.0667	3.89915		527500	33.9	37.6	34	35.1667	2.10792		527500	32.7	29.2	29.2	30.3667	2.02073
	528000	44.2	28.8	28.8	33.9333	8.89119		528000	47.6	43.7	41.7	44.3333	3.00056		528000	25.3	38.9	38.9	34.3667	7.85196		528000	28.8	26.9	26.9	27.5333	1.09697
	528500	38.8	30	30	32.9333	5.08068		528500	42.6	40.7	36	39.7667	3.39755		528500	24.2	31.2	27.3	27.5667	3.50761		528500	29.9	28.3	26.7	28.3	1.6
	529000	39.5	24.4	24.4	29.4333	8.71799		529000	45.5	41.8	40	42.4333	2.80416		529000	27.5	40.5	38.6	35.5333	7.02163		529000	31.7	31.7	31.7	31.7	0
	529500	37.3	27.5	27.5	30.7667	5.65803		529500	47.8	44.1	40.2	44.0333	3.80044		529500	15.2	32.1	32.1	26.4667	9.75722		529500	32.5	30.8	30.8	31.3667	0.981495
	530000	33.6	20.8	20.8	25.0667	7.39008		530000	47.4	42	38.3	42.5667	4.57639		530000	17.5	20.7	20.7	19.6333	1.84752		530000	18.6	18.6	18.6	18.6	0
	530500	41.7	26.5	26.5	31.5667	8.77572		530500	43.3	39.4	35.5	39.4	3.9		530500	19.7	37.9	37.9	31.8333	10.5078		530500	21.9	20.4	20.4	20.9	0.866025
	531000	44.8	35.1	33.1	37.6667	6.25806		531000	54.1	52.1	48.3	51.5	2.94618		531000	29.9	31.7	31.7	31.1	1.03923		531000	27.5	25.8	25.8	26.3667	0.981495
	531500	40.8	31.9	31.9	34.8667	5.13842		531500	44.2	44.2	40.5	42.9667	2.1362		531500	29.7	31.8	28.1	29.8667	1.85562		531500	36.6	36.6	36.6	36.6	0
	532000	42.2	26.5	26.5	31.7333	9.0644		532000	50.5	50.5	42.2	47.7333	4.79201		532000	25.1	29.9	27.9	27.6333	2.41109		532000	33.4	29.5	27.5	30.1333	3.00056
	532500	45.2	28.1	26.5	33.2667	10.3655		532500	44.1	40	36	40.0333	4.0501		532500	18.1	27.5	27.5	24.3667	5.42709		532500	35.7	32.2	32.2	33.3667	2.02073
	533000	40.5	27	27	31.5	7.79423		533000	45.7	43.7	40	43.1333	2.89194		533000	16.6	31.3	31.3	26.4	8.48705		533000	34.1	34.1	32.3	33.5	1.03923
	533500	44.8	33.9	33.9	37.5333	6.29312		533500	39.2	35.5	28	34.2333	5.70643		533500	27.4	25.8	25.8	26.3333	0.92376		533500	34.4	32.6	30.8	32.6	1.8
	534000	53.5	33.9	33.9	40.4333	11.3161		534000	44.6	44.6	39.1	42.7667	3.17543		534000	26.2	32.7	32.7	30.5333	3.75278		534000	38.8	38.8	38.8	38.8	0
	534500	36.5	28.8	28.8	31.3667	4.4456		534500	38.2	32.8	21.8	30.9333	8.35783		534500	16.5	35.1	35.1	28.9	10.7387		534500	28.5	26.5	26.5	27.1667	1.1547
	535000	37.6	26.9	26.9	30.4667	6.17765		535000	48.8	46.7	40.8	45.4333	4.14769		535000	21.6	36.9	35	31.1667	8.33926		535000	28.2	24.8	24.8	25.9333	1.96299
	535500	29.8	26	26	27.2667	2.19393		535500	33.2	31.4	31.4	32	1.03923		535500	20.5	26.2	26.2	24.3	3.2909		535500	26.2	26.2	26.2	26.2	0
	536000	35.2	31.4	31.4	32.6667	2.19393		536000	34.1	32.4	30.6	32.3667	1.75024		536000	23	35.6	32.2	30.2667	6.51869		536000	29.6	27.7	27.7	28.3333	1.09697
	536500	34.1	20.5	18.8	24.4667	8.3859		536500	43.3	33.4	27.9	34.8667	7.80406		536500	32.7	36.2	32.4	33.7667	2.11266		536500	32.8	28.6	28.6	30	2.42487
	537000	36.5	26.4	26.4	29.7667	5.83124		537000	41.2	35.1	31.4	35.9	4.94874		537000	33.6	36	36	35.2	1.38564		537000	26	26	26	26	0
	537500	39.4	24.4	24.4	29.4	8.66025		537500	34.7	34.7	32.8	34.0667	1.09697		537500	19.6	33.2	31.4	28.0667	7.38738		537500	39.5	39.5	39.5	39.5	0
	538000	40.5	28.6	28.6	32.5667	6.87047		538000	41.5	35.8	33.9	37.0667	3.95517		538000	12	31.4	31.4	24.9333	11.2006		538000	32.7	26.3	26.3	28.4333	3.69504
	538500	46.5	30.6	30.6	35.9	9.17987		538500	49	45.2	39.2	44.4667	4.94099		538500	16.5	35	35	28.8333	10.681		538500	36.4	30.6	28.7	31.9	4.01123
	539000	40	29.1	29.1	32.7333	6.29312		539000	37.5	35.6	31.8	34.9667	2.9023		539000	27.8	24.3	24.3	25.4667	2.02073		539000	25.3	23.6	23.6	24.1667	0.981495
	539500	29.5	21.6	21.6	24.2333	4.56107		539500	42.7	39.2	33.9	38.6	4.43058		539500	29.7	22	22	24.5667	4.4456		539500	28.4	28.4	28.4	28.4	4.35117e-15
	540000	51.3	28.4	28.4	36.0333	13.2213		540000	37	35.2	31.5	34.5667	2.80416		540000	23.1	28.4	28.4	26.6333	3.05996		540000	27.3	25.3	25.3	25.9667	1.1547
	540500	36	23.8	23.8	27.8667	7.04367		540500	36.4	36.4	34.5	35.7667	1.09697		540500	27.6	30.4	30.4	29.4667	1.61658		540500	27.3	25.3	25.3	25.9667	1.1547
	541000	40.2	30.6	30.6	33.8	5.54256		541000	44.6	40.8	40.8	42.0667	2.19393		541000	23.1	38	38	33.0333	8.60252		541000	35.7	30.4	28.6	31.5667	3.69098
	541500	43.3	31.4	31.4	35.3667	6.87047		541500	39.4	34	34	35.8	3.11769		541500	24.4	42	40.2	35.5333	9.68366		541500	34.8	33	33	33.6	1.03923
	542000	41.8	34.8	34.8	37.1333	4.04145		542000	31.9	28.4	24.9	28.4	3.5		542000	27	31.1	31.1	29.7333	2.36714		542000	36.4	28.6	27.1	30.7	4.993
	542500	57.5	51	49.3	52.6	4.32782		542500	33	29.1	27.2	29.7667	2.95691		542500	19.3	22.8	22.8	21.6333	2.02073		542500	24.3	24.3	23.8	24.1333	0.288675
	543000	69.9	59.9	59.9	63.2333	5.7735		543000	42.4	38.5	34.6	38.5	3.9		543000	34.5	26.2	26.2	28.9667	4.79201		543000	42.6	38.6	38.6	39.9333	2.3094
	543500	75.8	70.9	70.9	72.5333	2.82902		543500	46.7	41.2	39.4	42.4333	3.80307		543500	28.2	32.9	32.9	31.3333	2.71355		543500	34.7	30.9	30.9	32.1667	2.19393
	544000	80.6	74.6	74.6	76.6	3.4641		544000	57.1	49.3	41.3	49.2333	7.90021		544000	20.1	29.2	29.2	26.1667	5.25389		544000	33.9	32.2	32.2	32.7667	0.981495
	544500	74.6	68.5	62.9	68.6667	5.85178		544500	40.5	36.1	31.3	35.9667	4.60145		544500	25	25.9	24.2	25.0333	0.85049		544500	47.6	45.7	45.7	46.3333	1.09697
	545000	70.4	66.7	55.2	64.1	7.92654		545000	26.5	26.5	20.8	24.6	3.2909		545000	16.4	34.4	34.4	28.4	10.3923		545000	25.1	25.1	23.1	24.4333	1.1547
	545500	72.5	66.2	62.5	67.0667	5.05602		545500	38.8	34.8	28.9	34.1667	4.98029		545500	23.8	28.9	27	26.5667	2.57747		545500	31.3	26.5	26.5	28.1	2.77128
	546000	59.5	57.8	57.8	58.3667	0.981495		546000	34.1	32.3	28.7	31.7	2.74955		546000	27	28.1	28.1	27.7333	0.635085		546000	21.7	19.9	19.9	20.5	1.03923
	546500	55.6	49.3	49.3	51.4	3.63731		546500	49	43.5	41.5	44.6667	3.88373		546500	18.6	35.8	35.8	30.0667	9.93042		546500	32.7	25.2	25.2	27.7	4.33013
	547000	51.3	41.8	40	44.3667	6.07152		547000	46.1	46.1	44.1	45.4333	1.1547		547000	24.6	27	25.3	25.6333	1.23423		547000	40	32.7	32.7	35.1333	4.21466
	547500	45	39.4	37.6	40.6667	3.85919		547500	38.2	32.8	29.1	33.3667	4.57639		547500	21.7	25.8	24	23.8333	2.05508		547500	29.1	27.1	27.1	27.7667	1.1547
	548000	45.2	39.4	39.4	41.3333	3.34863		548000	39.8	38	38	38.6	1.03923		548000	21.3	21.2	21.2	21.2333	0.057735		548000	23.2	22.6	22.6	22.8	0.34641
	548500	41.2	29.3	29.3	33.2667	6.87047		548500	36.4	36.4	30.6	34.4667	3.34863		548500	29.8	35.7	33.8	33.1	3.01164		548500	31.4	31.4	31.4	31.4	4.35117e-15
	549000	37.5	28.1	28.1	31.2333	5.42709		549000	40.5	38.6	36.6	38.5667	1.95021		549000	26.2	29.3	27.5	27.6667	1.55671		549000	26	24.2	24.2	24.8	1.03923
	549500	39.7	28.4	28.4	32.1667	6.52406		549500	37	33.3	29.6	33.3	3.7		549500	24.5	37.7	36.5	32.9	7.29932		549500	27.5	22.3	22.3	24.0333	3.00222
	550000	32.4	21.6	21.6	25.2	6.23538		550000	35.6	31.6	29.1	32.1	3.27872		550000	23	20.4	18.7	20.7	2.16564		550000	29.1	29.1	29.1	29.1	4.35117e-15
	550500	30.5	21.5	21.5	24.5	5.19615		550500	33.9	28.5	24.9	29.1	4.5299		550500	31.8	28	28	29.2667	2.19393		550500	23.6	21.8	21.8	22.4	1.03923
	551000	37.5	23.2	23.2	27.9667	8.25611		551000	43.1	42.7	42.7	42.8333	0.23094		551000	22.9	37.3	37.3	32.5	8.31384		551000	32.1	26.2	26.2	28.1667	3.40637
	551500	36	22.8	22.8	27.2	7.62102		551500	45.7	36	32.4	38.0333	6.8792		551500	16.8	29.2	29.2	25.0667	7.15914		551500	25.8	23.9	23.9	24.5333	1.09697
	552000	31.3	23.5	23.5	26.1	4.50333		552000	31.2	26	22.2	26.4667	4.51811		552000	22.2	28.8	28.8	26.6	3.81051		552000	32.1	30.4	30.4	30.9667	0.981495
	552500	34.6	25.4	25.4	28.4667	5.31162		552500	41.7	39.8	34.1	38.5333	3.95517		552500	27.5	28.7	27	27.7333	0.873689		552500	25.1	25.1	25.1	25.1	4.35117e-15
	553000	26.9	15.8	15.8	19.5	6.40859		553000	38.6	36.8	36.8	37.4	1.03923		553000	23.7	31.5	30.3	28.5	4.2		553000	32.8	29.2	29.2	30.4	2.07846
	553500	23.9	21.4	21.4	22.2333	1.44338		553500	41.7	39.7	34	38.4667	3.99541		553500	13	37	34.7	28.2333	13.2425		553500	30.6	26	24.3	26.9667	3.25935
	554000	27.8	18.5	18.5	21.6	5.36936		554000	35.3	35.3	31.4	34	2.25167		554000	18.7	32.7	30.8	27.4	7.59408		554000	45.5	36	36	39.1667	5.48483
	554500	26.4	18.9	18.9	21.4	4.33013		554500	32.8	30.8	28.2	30.6	2.30651		554500	24	34.7	34.7	31.1333	6.17765		554500	37.3	30.2	30.2	32.5667	4.09919
	555000	35.5	24.3	24.3	28.0333	6.46632		555000	41.2	39.4	34.2	38.2667	3.63501		555000	16	37.6	35.8	29.8	11.985		555000	36.8	33.1	33.1	34.3333	2.1362
	555500	40.5	25.1	25.1	30.2333	8.89119		555500	39.5	35.8	35.8	37.0333	2.1362		555500	22.5	31.2	29.3	27.6667	4.5742		555500	33.1	26.5	26.5	28.7	3.81051
	556000	43.7	20.8	20.8	28.4333	13.2213		556000	37.9	35.8	35.8	36.5	1.21244		556000	25.6	29.9	26.2	27.2333	2.32881		556000	43.7	41.8	41.8	42.4333	1.09697
	556500	27.5	21.7	21.7	23.6333	3.34863		556500	42.7	42.7	36.9	40.7667	3.34863		556500	27.1	46.7	46.7	40.1667	11.3161		556500	34.6	32.8	31	32.8	1.8
	557000	32.2	22	22	25.4	5.88897		557000	52.1	47.8	47.8	49.2333	2.48261		557000	31.1	40.3	34.6	35.3333	4.64363		557000	37.7	37.7	36	37.1333	0.981495
	557500	43.5	26.5	26.5	32.1667	9.81495		557500	41.7	37.6	37.6	38.9667	2.36714		557500	24.1	26	26	25.3667	1.09697		557500	30.3	30.3	28.4	29.6667	1.09697
	558000	35.5	23.8	23.8	27.7	6.755		558000	31.1	31.1	29.2	30.4667	1.09697		558000	14.5	33.7	33.7	27.3	11.0851		558000	34.6	30.5	30.5	31.8667	2.36714
	558500	36.5	23	23	27.5	7.79423		558500	38.9	38.9	36.9	38.2333	1.1547		558500	21.6	40	40	33.8667	10.6232		558500	41.7	32.6	32.6	35.6333	5.25389
	559000	37.6	26.3	24.6	29.5	7.06612		559000	46.1	46.1	43.5	45.2333	1.50111		559000	28.3	32.8	32.8	31.3	2.59808		559000	41.3	39.5	39.5	40.1	1.03923
	559500	39.4	29.5	29.5	32.8	5.71577		559500	44.4	44.4	44.4	44.4	0		559500	26.5	35.2	35.2	32.3	5.02295		559500	33.2	27.6	27.6	29.4667	3.23316
	560000	37.2	23.3	23.3	27.9333	8.02517		560000	37.6	37.6	32.5	35.9	2.94449		560000	23.8	36.4	36.4	32.2	7.27461		560000	27	24.8	23.1	24.9667	1.95533
	560500	40.2	25.8	25.8	30.6	8.31384		560500	29	27.1	23.8	26.6333	2.63122		560500	22.2	31.6	31.6	28.4667	5.42709		560500	52.6	52.6	52.6	52.6	0
	561000	33.6	25.8	25.8	28.4	4.50333		561000	45	39.4	32.8	39.0667	6.10683		561000	21.2	38.2	35.8	31.7333	9.20072		561000	34.7	33	33	33.5667	0.981495
	561500	41.8	20.9	20.9	27.8667	12.0666		561500	42.9	32.6	32.6	36.0333	5.94671		561500	26	53.5	44.2	41.2333	13.988		561500	31	29	29	29.6667	1.1547
	562000	45.7	25.7	25.7	32.3667	11.547		562000	41.2	37.3	37.3	38.6	2.25167		562000	22.8	33.4	31.5	29.2333	5.65184		562000	38.5	38.5	38.5	38.5	0
	562500	38	27.1	27.1	30.7333	6.29312		562500	37.3	37.3	35.5	36.7	1.03923		562500	20.4	28.9	28.9	26.0667	4.90748		562500	26.4	22.6	20.7	23.2333	2.9023
	563000	32.3	18.9	18.9	23.3667	7.73649		563000	39.7	35.6	31.6	35.6333	4.0501		563000	17.3	34.8	34.8	28.9667	10.1036		563000	42.7	32.1	32.1	35.6333	6.11991
	563500	30.8	21.7	21.7	24.7333	5.25389		563500	40.2	34.7	34.7	36.5333	3.17543		563500	9	27.3	27.3	21.2	10.5655		563500	27.5	27.5	27.5	27.5	0
	564000	32.7	24.6	24.6	27.3	4.67654		564000	43.5	41.7	36	40.4	3.91535		564000	29	42.4	40.7	37.3667	7.29543		564000	32.4	30.4	30.4	31.0667	1.1547
	564500	39.5	21.9	21.9	27.7667	10.1614		564500	54.9	52.9	52.9	53.5667	1.1547		564500	18.9	32.8	32.8	28.1667	8.02517		564500	41	32.6	32.6	35.4	4.84974
	565000	36.1	19.6	19.6	25.1	9.52628		565000	39.5	37.5	37.5	38.1667	1.1547		565000	20.8	38.2	36.4	31.8	9.5687		565000	37.9	33.4	31.4	34.2333	3.32916
	565500	29.9	17.5	17.5	21.6333	7.15914		565500	43.7	41.8	40.2	41.9	1.75214		565500	21.5	22.8	22.8	22.3667	0.750555		565500	38.3	32.5	27.4	32.7333	5.45374
	566000	30.4	19.7	17.9	22.6667	6.75747		566000	44.6	42.7	42.2	43.1667	1.26623		566000	22	45.7	45.7	37.8	13.6832		566000	39.2	37.3	35.5	37.3333	1.85023
	566500	38	26.6	26.6	30.4	6.58179		566500	38.2	36.4	36.4	37	1.03923		566500	17.8	38.2	32.4	29.4667	10.5116		566500	30.6	27.2	27.2	28.3333	1.96299
	567000	38.9	23.3	23.3	28.5	9.00666		567000	37.7	37.2	37.2	37.3667	0.288675		567000	18.9	28.5	28.5	25.3	5.54256		567000	36.6	36.6	34.7	35.9667	1.09697
	567500	35.2	23.5	23.5	27.4	6.755		567500	46.1	44.1	42.2	44.1333	1.95021		567500	36.2	27.5	27.5	30.4	5.02295		567500	45.5	40.5	38.8	41.6	3.48281
	568000	38	23.4	23.4	28.2667	8.42931		568000	42.7	38.9	36.9	39.5	2.94618		568000	20.8	41.8	41.8	34.8	12.1244		568000	30.9	29	29	29.6333	1.09697
	568500	33.8	25.2	25.2	28.0667	4.96521		568500	46.9	43.1	37.5	42.5	4.72864		568500	19.1	25.8	25.8	23.5667	3.86825		568500	44.4	42.6	42.6	43.2	1.03923
	569000	37.6	26.9	26.9	30.4667	6.17765		569000	30.1	28.4	24.8	27.7667	2.70617		569000	25.9	42.6	42.6	37.0333	9.64175		569000	39.2	31	31	33.7333	4.73427
	569500	38.3	23.5	23.5	28.4333	8.54478		569500	40.8	38.2	36.4	38.4667	2.21209		569500	18.1	35.5	35.5	29.7	10.0459		569500	38.6	33	29.4	33.6667	4.63609
	570000	44.8	25.7	25.7	32.0667	11.0274		570000	35.7	27.5	22.1	28.4333	6.84787		570000	20	31.9	31.9	27.9333	6.87047		570000	39.2	34.6	32.9	35.5667	3.25935
	570500	38.8	24	24	28.9333	8.54478		570500	38.2	30.6	30.6	33.1333	4.38786		570500	25	38	36.1	33.0333	7.02163		570500	43.5	37.6	37.6	39.5667	3.40637
	571000	38.9	25.3	25.3	29.8333	7.85196		571000	46.3	40.8	40.8	42.6333	3.17543		571000	24.8	34.8	34.8	31.4667	5.7735		571000	32.4	32.4	28.9	31.2333	2.02073
	571500	38.2	28.6	28.6	31.8	5.54256		571500	49.3	37.5	33.6	40.1333	8.17455		571500	22.7	36.6	34.7	31.3333	7.5368		571500	45	43.3	43.3	43.8667	0.981495
	572000	37.6	33.8	33.8	35.0667	2.19393		572000	37.6	35.6	35.6	36.2667	1.1547		572000	29.2	33	33	31.7333	2.19393		572000	36.6	36.6	36.6	36.6	0
	572500	44.6	32.9	32.9	36.8	6.755		572500	42.6	38.8	36.9	39.4333	2.9023		572500	23.6	33.8	33.8	30.4	5.88897		572500	39.5	39.5	39.5	39.5	0
	573000	39.1	29.2	29.2	32.5	5.71577		573000	32.5	32.5	32.5	32.5	0		573000	30.1	25.1	25.1	26.7667	2.88675		573000	38	38	36.2	37.4	1.03923
	573500	40.5	30.6	30.6	33.9	5.71577		573500	45	43.1	41.3	43.1333	1.85023		573500	15.2	28.9	28.9	24.3333	7.9097		573500	35.8	32.1	30.2	32.7	2.84781
	574000	39.5	23.3	23.3	28.7	9.35307		574000	49.5	47.6	43.7	46.9333	2.95691		574000	18.9	32.4	32.4	27.9	7.79423		574000	38.5	36.6	34.6	36.5667	1.95021
	574500	37	26	26	29.6667	6.35085		574500	41.8	38	32.4	37.4	4.72864		574500	24.7	32.5	30.8	29.3333	4.10163		574500	36.9	36.9	36.9	36.9	0
	575000	33.2	25.3	25.3	27.9333	4.56107		575000	60.6	51	49	53.5333	6.20108		575000	18.5	39.1	39.1	32.2333	11.8934		575000	42	38.5	38.5	39.6667	2.02073
	575500	40	21.8	21.8	27.8667	10.5078		575500	47.2	45.2	41.2	44.5333	3.05505		575500	23.6	27.5	27.5	26.2	2.25167		575500	50.8	43.3	43.3	45.8	4.33013
	576000	40.5	22.3	22.3	28.3667	10.5078		576000	31.4	31.4	27.9	30.2333	2.02073		576000	23.3	31.7	31.7	28.9	4.84974		576000	40.8	35.6	33.8	36.7333	3.63501
	576500	35	24.9	24.9	28.2667	5.83124		576500	38.8	38.8	34.8	37.4667	2.3094		576500	21.6	31.9	31.9	28.4667	5.94671		576500	31.3	29.5	27.6	29.4667	1.85023
	577000	31.8	19.6	19.6	23.6667	7.04367		577000	46.7	37	37	40.2333	5.6003		577000	20.9	36.9	35	30.9333	8.7409		577000	41.8	38.3	36.6	38.9	2.65141
	577500	29.5	20.8	20.8	23.7	5.02295		577500	33.9	33.9	33.1	33.6333	0.46188		577500	23.4	23	23	23.1333	0.23094		577500	49	41.5	41.5	44	4.33013
	578000	37.9	29.2	29.2	32.1	5.02295		578000	37.2	37.2	33.8	36.0667	1.96299		578000	19.9	32.2	32.2	28.1	7.10141		578000	37.9	34	31.7	34.5333	3.13422
	578500	44.8	25.4	25.4	31.8667	11.2006		578500	45.5	43.7	41.7	43.6333	1.90088		578500	27.9	34.8	34.8	32.5	3.98372		578500	39.8	37.9	36	37.9	1.9
	579000	44.6	26.5	26.5	32.5333	10.45		579000	30.2	28.4	23.6	27.4	3.41174		579000	21	34.4	32.5	29.3	7.25052		579000	35.3	32.7	32.7	33.5667	1.50111
	579500	36.2	24.8	24.8	28.6	6.58179		579500	42.7	39.2	33.8	38.5667	4.48367		579500	17.2	34.1	34.1	28.4667	9.75722		579500	38.6	36.8	36.8	37.4	1.03923
	580000	33.3	22.4	22.4	26.0333	6.29312		580000	48.3	44.8	43.1	45.4	2.65141		580000	22.8	38	38	32.9333	8.77572		580000	36.2	34.4	32.6	34.4	1.8
	580500	46.1	26.8	26.8	33.2333	11.1429		580500	29.1	29.1	27.2	28.4667	1.09697		580500	22.4	20.9	20.9	21.4	0.866025		580500	47.8	44.2	44.2	45.4	2.07846
	581000	38.9	26	26	30.3	7.44782		581000	43.3	41.3	33.4	39.3333	5.23482		581000	26.9	35.7	35.7	32.7667	5.08068		581000	37.6	35.6	35.6	36.2667	1.1547
	581500	37.3	16.8	16.8	23.6333	11.8357		581500	38.2	38.2	36.4	37.6	1.03923		581500	23.6	29.9	29.9	27.8	3.63731		581500	46.5	38.8	38.8	41.3667	4.4456
	582000	28.8	21.5	21.5	23.9333	4.21466		582000	48.3	46.3	46.3	46.9667	1.1547		582000	29.9	33.2	33.2	32.1	1.90526		582000	39.7	38	36.2	37.9667	1.75024
	582500	36.1	22	22	26.7	8.14064		582500	39.1	39.1	35.3	37.8333	2.19393		582500	32.1	29.1	29.1	30.1	1.73205		582500	34.6	34.6	32.7	33.9667	1.09697
	583000	32.6	21	21	24.8667	6.69726		583000	39.1	39.1	39.1	39.1	0		583000	18.5	38.6	35	30.7	10.7177		583000	35.6	32.1	32.1	33.2667	2.02073
	583500	36.9	24.6	22.7	28.0667	7.70865		583500	34.6	30.8	30.8	32.0667	2.19393		583500	33.3	30.3	28.7	30.7667	2.33524		583500	44.2	42.4	42.4	43	1.03923
	584000	42.4	27.7	27.7	32.6	8.48705		584000	39.7	34.2	27.8	33.9	5.95567		584000	21.1	35.7	31.4	29.4	7.50267		584000	27.9	24.4	24.4	25.5667	2.02073
	584500	43.5	25.8	25.8	31.7	10.2191		584500	42.9	39.1	27.9	36.6333	7.79829		584500	20.3	41	41	34.1	11.9512		584500	19.4	16.5	16.5	17.4667	1.67432
	585000	36	15.9	15.9	22.6	11.6047		585000	43.5	41.5	39.5	41.5	2		585000	23.9	41	39.1	34.6667	9.37248		585000	25.8	20.3	18.5	21.5333	3.80307
	585500	28.1	20.5	20.5	23.0333	4.38786		585500	47.2	41.5	39.7	42.8	3.91535		585500	27.2	42.2	40.3	36.5667	8.16721		585500	24.5	22.6	20.7	22.6	1.9
	586000	40.7	24	24	29.5667	9.64175		586000	42.6	42.6	33.4	39.5333	5.31162		586000	24.7	37.3	34.8	32.2667	6.67108		586000	41.7	34.1	34.1	36.6333	4.38786
	586500	43.5	27.6	27.6	32.9	9.17987		586500	37.2	37.2	35.2	36.5333	1.1547		586500	31.2	23.6	21.8	25.5333	4.98932		586500	31.9	30.1	28.3	30.1	1.8
	587000	46.1	32.4	32.4	36.9667	7.9097		587000	35.2	33.2	31.3	33.2333	1.95021		587000	28.3	38.2	38.2	34.9	5.71577		587000	28.7	26.9	25.1	26.9	1.8
	587500	53.5	30.6	30.6	38.2333	13.2213		587500	34.8	31.3	28	31.3667	3.40049		587500	16.7	40.7	38.8	32.0667	13.3418		587500	28.7	25.3	25.3	26.4333	1.96299
	588000	44.2	25.8	25.8	31.9333	10.6232		588000	41	35.1	33.2	36.4333	4.06735		588000	28.7	40.2	39.2	36.0333	6.3705		588000	25.6	25.6	25.6	25.6	4.35117e-15
	588500	34.8	25.2	25.2	28.4	5.54256		588500	44.2	38.8	36.9	39.9667	3.78726		588500	26.8	38.9	38.9	34.8667	6.98594		588500	31.3	29.4	27.5	29.4	1.9
	589000	32.2	28.7	28.7	29.8667	2.02073		589000	40.3	34	32.3	35.5333	4.21466		589000	19.7	28.2	28.2	25.3667	4.90748		589000	27	22.2	22.2	23.8	2.77128
	589500	35.2	24.3	24.3	27.9333	6.29312		589500	46.5	44.6	44.6	45.2333	1.09697		589500	28.2	32.6	32.6	31.1333	2.54034		589500	27.5	25.5	25.5	26.1667	1.1547
	590000	42.9	20.9	20.9	28.2333	12.7017		590000	52.1	50	47.8	49.9667	2.15019		590000	22.1	35.1	33.1	30.1	7		590000	30.3	29.2	29.2	29.5667	0.635085
	590500	34.7	20.3	20.3	25.1	8.31384		590500	47.8	44.1	42	44.6333	2.93655		590500	13.6	32.5	32.5	26.2	10.9119		590500	33.3	24.6	24.6	27.5	5.02295
	591000	44.6	29.2	29.2	34.3333	8.89119		591000	36.8	36.8	36.8	36.8	0		591000	13.4	41.5	38	30.9667	15.3135		591000	30.1	25.3	25.3	26.9	2.77128
	591500	44.1	25.7	25.7	31.8333	10.6232		591500	51.3	42.2	42.2	45.2333	5.25389		591500	26.7	31.4	31.4	29.8333	2.71355		591500	31	27	27	28.3333	2.3094
	592000	40.8	35	35	36.9333	3.34863		592000	36.4	34.4	32.5	34.4333	1.95021		592000	31.3	44.4	44.4	40.0333	7.56329		592000	33.1	31.3	31.3	31.9	1.03923
	592500	32.8	27	27	28.9333	3.34863		592500	42	42	38.2	40.7333	2.19393		592500	31.1	28.7	26.8	28.8667	2.15484		592500	42.7	34.4	34.4	37.1667	4.79201
	593000	43.1	30.7	30.7	34.8333	7.15914		593000	38.3	36.5	32.9	35.9	2.74955		593000	29.1	30.8	30.8	30.2333	0.981495		593000	32.9	25.2	25.2	27.7667	4.4456
	593500	44.8	29.4	29.4	34.5333	8.89119		593500	43.1	41.2	41.2	41.8333	1.09697		593500	26.8	31	29	28.9333	2.10079		593500	33.8	28.2	28.2	30.0667	3.23316
	594000	40	22.1	22.1	28.0667	10.3346		594000	41.8	40	40	40.6	1.03923		594000	24.9	36.8	36.8	32.8333	6.87047		594000	31.3	25.5	25.5	27.4333	3.34863
	594500	48.3	27.8	27.8	34.6333	11.8357		594500	45.9	42.2	40.3	42.8	2.84781		594500	20.2	26.9	26.9	24.6667	3.86825		594500	31.4	29.6	29.6	30.2	1.03923
	595000	42.6	25.1	23.2	30.3	10.6944		595000	46.7	37.7	35.8	40.0667	5.82266		595000	20.2	38.3	38.3	32.2667	10.45		595000	31.9	28.2	28.2	29.4333	2.1362
	595500	44.2	36.5	36.5	39.0667	4.4456		595500	42.9	40.8	37	40.2333	2.99054		595500	17.2	28.5	28.5	24.7333	6.52406		595500	30.5	23.3	23.3	25.7	4.15692
	596000	33.9	22.6	22.6	26.3667	6.52406		596000	46.7	41	41	42.9	3.2909		596000	29.3	38.2	36.2	34.5667	4.6694		596000	33.6	30.2	30.2	31.3333	1.96299
	596500	40	34.2	34.2	36.1333	3.34863		596500	51.3	43.7	37.9	44.3	6.72012		596500	17.9	39.2	39.2	32.1	12.2976		596500	33.4	27.9	27.9	29.7333	3.17543
	597000	41.5	25.3	25.3	30.7	9.35307		597000	38.5	38.5	34.6	37.2	2.25167		597000	18.7	28.9	27	24.8667	5.42433		597000	24.4	21	21	22.1333	1.96299
	597500	38.2	21.8	21.8	27.2667	9.46854		597500	32.5	30.3	27.4	30.0667	2.55799		597500	20.9	38.6	38.6	32.7	10.2191		597500	38.6	33.1	33.1	34.9333	3.17543
	598000	35.1	25.5	25.5	28.7	5.54256		598000	49.8	40.2	40.2	43.4	5.54256		598000	16.6	29	29	24.8667	7.15914		598000	28.7	26.7	26.7	27.3667	1.1547
	598500	46.7	31.2	29.2	35.7	9.57862		598500	40.5	36.6	34.6	37.2333	3.00056		598500	26.5	28.7	28.7	27.9667	1.27017		598500	37	37	37	37	0
	599000	36.9	31.2	29.6	32.5667	3.8371		599000	42.7	38.9	37.2	39.6	2.81603		599000	24.1	34	32.4	30.1667	5.31445		599000	40.7	35.1	35.1	36.9667	3.23316
	599500	34.1	24.6	24.6	27.7667	5.48483		599500	37.6	33.8	33.8	35.0667	2.19393		599500	18.3	30.1	30.1	26.1667	6.81273		599500	25	24.3	24.3	24.5333	0.404145
	600000	32.7	29.9	29.9	30.8333	1.61658		600000	42.9	37	33.1	37.6667	4.9339		600000	27	36.1	32.5	31.8667	4.58294		600000	39.8	30.4	30.4	33.5333	5.42709
	600500	34.5	23.6	23.6	27.2333	6.29312		600500	49	45.2	43.5	45.9	2.81603		600500	19.3	23.8	23.8	22.3	2.59808		600500	29	27.1	27.1	27.7333	1.09697
	601000	44.2	30.5	30.5	35.0667	7.9097		601000	41.2	35.2	33.3	36.5667	4.12351		601000	24	32.7	32.7	29.8	5.02295		601000	27.1	27.1	27.1	27.1	4.35117e-15
	601500	42.6	29	29	33.5333	7.85196		601500	37.3	31.1	28.5	32.3	4.52106		601500	13.2	28.6	28.6	23.4667	8.89119		601500	24.6	24.6	24.6	24.6	4.35117e-15
	602000	33.3	24.1	24.1	27.1667	5.31162		602000	44.8	41.5	32.8	39.7	6.19919		602000	19.9	25.1	22.9	22.6333	2.61024		602000	35.1	33.1	33.1	33.7667	1.1547
	602500	40.8	29.1	29.1	33	6.755		602500	35.8	32.2	30.2	32.7333	2.83784		602500	29.6	30.8	28.8	29.7333	1.00664		602500	32.6	28.7	28.7	30	2.25167
	603000	42.2	33	33	36.0667	5.31162		603000	43.9	41.8	41.8	42.5	1.21244		603000	19	30.8	30.8	26.8667	6.81273		603000	28.9	25.3	25.3	26.5	2.07846
	603500	45.7	29.7	29.7	35.0333	9.2376		603500	46.9	44.8	42.9	44.8667	2.00083		603500	29.9	33.7	31.8	31.8	1.9		603500	31.1	29.2	29.2	29.8333	1.09697
	604000	42.2	29.1	29.1	33.4667	7.56329		604000	33.6	28.2	26.6	29.4667	3.66788		604000	33.8	28.5	28.5	30.2667	3.05996		604000	36	30.3	30.3	32.2	3.2909
	604500	37.5	25.6	25.6	29.5667	6.87047		604500	31	24.6	24.6	26.7333	3.69504		604500	40.8	31.5	31.5	34.6	5.36936		604500	27.4	23.9	23.9	25.0667	2.02073
	605000	37	29.9	29.9	32.2667	4.09919		605000	44.2	36.1	34.2	38.1667	5.31068		605000	25.4	26.5	26.5	26.1333	0.635085		605000	37.7	34	34	35.2333	2.1362
	605500	36.5	21.9	21.9	26.7667	8.42931		605500	45.2	41.3	37.5	41.3333	3.85011		605500	26.7	41.5	37.7	35.3	7.68635		605500	48.8	43.3	43.3	45.1333	3.17543
	606000	42.2	20.6	20.6	27.8	12.4708		606000	42	37.7	37.7	39.1333	2.48261		606000	39.1	40.8	38.9	39.6	1.04403		606000	31	29	29	29.6667	1.1547
	606500	44.4	29.5	29.5	34.4667	8.60252		606500	38.5	34.6	32.7	35.2667	2.95691		606500	19.6	46.5	42.7	36.2667	14.5583		606500	26.1	24.2	24.2	24.8333	1.09697
	607000	44.4	25.1	25.1	31.5333	11.1429		607000	38.2	38.2	32.5	36.3	3.2909		607000	25.8	37	35.2	32.6667	6.01443		607000	33.8	28.2	26.3	29.4333	3.89915
	607500	38	26.2	26.2	30.1333	6.81273		607500	46.1	40.5	38.8	41.8	3.81969		607500	33.1	32.8	28.5	31.4667	2.57358		607500	35.1	31.3	31.3	32.5667	2.19393
	608000	38.2	22.9	22.9	28	8.83346		608000	36.2	30.6	28.7	31.8333	3.89915		608000	24.9	25.3	23.6	24.6	0.888819		608000	27.2	27.2	27.2	27.2	0
	608500	35.8	24.5	24.5	28.2667	6.52406		608500	31.7	28.2	26.5	28.8	2.65141		608500	28.3	24.4	24.4	25.7	2.25167		608500	27.3	25.4	25.4	26.0333	1.09697
	609000	40	27.5	27.5	31.6667	7.21688		609000	40.8	39.1	35.5	38.4667	2.70617		609000	21.1	29.2	29.2	26.5	4.67654		609000	29.2	23.8	23.8	25.6	3.11769
	609500	36.5	26.4	24.5	29.1333	6.45006		609500	42	40	38.2	40.0667	1.90088		609500	27.9	33.8	33.8	31.8333	3.40637		609500	34.8	26.2	26.2	29.0667	4.96521
	610000	41.8	30.3	30.3	34.1333	6.63953		610000	36.2	32.4	30.5	33.0333	2.9023		610000	30.4	43.3	41.3	38.3333	6.94286		610000	41.2	33.7	33.7	36.2	4.33013
	610500	38.8	27.2	27.2	31.0667	6.69726		610500	35.7	30.1	30.1	31.9667	3.23316		610500	26.2	30.3	28.5	28.3333	2.05508		610500	27.2	18.1	18.1	21.1333	5.25389
	611000	37	26.5	26.5	30	6.06218		611000	54.3	48.5	42.9	48.5667	5.70029		611000	24	24.6	24.6	24.4	0.34641		611000	27	22.2	22.2	23.8	2.77128
	611500	39.2	27.2	27.2	31.2	6.9282		611500	37.9	36	34	35.9667	1.95021		611500	27.5	24	22.2	24.5667	2.69506		611500	36.4	32.6	32.6	33.8667	2.19393
	612000	36.1	27.5	27.5	30.3667	4.96521		612000	40.7	38.9	35.3	38.3	2.74955		612000	14.2	37.5	37.5	29.7333	13.4523		612000	32.8	29.3	29.3	30.4667	2.02073
	612500	43.1	26.5	26.5	32.0333	9.58401		612500	36.5	34.6	32.7	34.6	1.9		612500	32.4	44.8	44.8	40.6667	7.15914		612500	34.5	28.7	28.7	30.6333	3.34863
	613000	34.7	22.5	22.5	26.5667	7.04367		613000	48.5	46.7	41.2	45.4667	3.80307		613000	16.4	31.2	31.2	26.2667	8.54478		613000	33.8	31.8	31.8	32.4667	1.1547
	613500	45.2	28.2	28.2	33.8667	9.81495		613500	48.1	48.1	44.2	46.8	2.25167		613500	20.8	35.1	35.1	30.3333	8.25611		613500	38.3	32.9	31.1	34.1	3.747
	614000	41.5	27.2	27.2	31.9667	8.25611		614000	50.8	48.8	46.7	48.7667	2.0502		614000	32.5	34.4	32.6	33.1667	1.06927		614000	33.9	30.4	30.4	31.5667	2.02073
	614500	40.3	27.9	27.9	32.0333	7.15914		614500	58.5	50.5	41.8	50.2667	8.35244		614500	29.5	26	26	27.1667	2.02073		614500	29.2	23.8	23.8	25.6	3.11769
	615000	47.4	25.3	25.3	32.6667	12.7594		615000	52.4	46.7	43.1	47.4	4.68935		615000	28.9	35.7	32.1	32.2333	3.40196		615000	34.4	32.6	32.6	33.2	1.03923
	615500	38.3	22.8	22.8	27.9667	8.94893		615500	47.6	47.6	40	45.0667	4.38786		615500	22.2	31.1	31.1	28.1333	5.13842		615500	41.5	36.1	36.1	37.9	3.11769
	616000	41.2	26.8	26.8	31.6	8.31384		616000	56.8	56.8	56.8	56.8	8.70234e-15		616000	26.2	42.2	42.2	36.8667	9.2376		616000	37.7	31.7	31.7	33.7	3.4641
	616500	37.6	26.3	26.3	30.0667	6.52406		616500	53.5	53.5	51.5	52.8333	1.1547		616500	16.9	36	29.9	27.6	9.75551		616500	42.2	32.6	32.6	35.8	5.54256
	617000	36.1	20.6	20.6	25.7667	8.94893		617000	46.1	46.1	42.6	44.9333	2.02073		617000	23.4	37.5	37.5	32.8	8.14064		617000	32.6	26.8	26.8	28.7333	3.34863
	617500	36.6	25	25	28.8667	6.69726		617500	50.3	46.5	44.6	47.1333	2.9023		617500	23.8	34	32.2	30	5.44426		617500	38	35.3	35.3	36.2	1.55885
	618000	46.3	34.7	34.7	38.5667	6.69726		618000	47.6	47.6	37.6	44.2667	5.7735		618000	16.3	31.3	25.5	24.3667	7.56395		618000	40.7	38.8	38.8	39.4333	1.09697
	618500	39.4	32.7	32.7	34.9333	3.86825		618500	50	46.5	44.6	47.0333	2.73922		618500	28.3	30.3	30.3	29.6333	1.1547		618500	31.1	27.2	27.2	28.5	2.25167
	619000	34.8	29.4	29.4	31.2	3.11769		619000	50.5	46.5	38.8	45.2667	5.94671		619000	24.1	37.2	37.2	32.8333	7.56329		619000	43.1	33.3	31.3	35.9	6.31506
	619500	44.2	25	25	31.4	11.0851		619500	46.3	46.3	44.4	45.6667	1.09697		619500	19.7	24.4	24.4	22.8333	2.71355		619500	38.9	37.2	37.2	37.7667	0.981495
	620000	40.8	29.1	29.1	33	6.755		620000	41.5	37.6	37.6	38.9	2.25167		620000	21.3	32.1	32.1	28.5	6.23538		620000	33.8	28.2	28.2	30.0667	3.23316
	620500	38.5	25.8	25.8	30.0333	7.33235		620500	45.9	42.2	40.3	42.8	2.84781		620500	16.2	41.3	37.6	31.7	13.5503		620500	34.2	30.7	30.7	31.8667	2.02073
	621000	38.6	25.1	25.1	29.6	7.79423		621000	36.2	34.6	25.9	32.2333	5.54286		621000	20.2	38	36.1	31.4333	9.77463		621000	42.7	38.8	36.9	39.4667	2.95691
	621500	39.2	21.2	21.2	27.2	10.3923		621500	36.5	31.1	27.4	31.6667	4.57639		621500	23.1	37.2	37.2	32.5	8.14064		621500	28.4	28.4	28.4	28.4	4.35117e-15
	622000	39.8	21.7	21.7	27.7333	10.45		622000	46.1	43.7	39.2	43	3.50286		622000	29	31.3	26	28.7667	2.65769		622000	29	18.1	18.1	21.7333	6.29312
	622500	35.5	26.1	26.1	29.2333	5.42709		622500	41.2	41.2	35.6	39.3333	3.23316		622500	21	29.7	26	25.5667	4.36616		622500	21.5	21.5	21.5	21.5	0
	623000	40	26.4	26.4	30.9333	7.85196		623000	40	32.4	30.5	34.3	5.02693		623000	32.4	35.7	34.5	34.2	1.67033		623000	34.6	26.3	26.3	29.0667	4.79201
	623500	42	28.7	28.7	33.1333	7.67876		623500	47.2	39.8	38	41.6667	4.87579		623500	21.6	50	45.9	39.1667	15.3507		623500	24.1	22.2	22.2	22.8333	1.09697
	624000	36.1	22.3	22.3	26.9	7.96743		624000	38.5	38.5	34.6	37.2	2.25167		624000	30.4	38	38	35.4667	4.38786		624000	43.9	43.9	43.9	43.9	0
	624500	42	23.3	23.3	29.5333	10.7965		624500	42	38.3	37.2	39.1667	2.51462		624500	17.7	37.9	36.1	30.5667	11.1791		624500	30.9	28.9	28.9	29.5667	1.1547
	625000	42.2	25.2	25.2	30.8667	9.81495		625000	39.1	37.5	32.3	36.3	3.55528		625000	20.9	26.6	26.6	24.7	3.2909		625000	41.7	30.3	30.3	34.1	6.58179
	625500	39.4	28.7	28.7	32.2667	6.17765		625500	36.1	34	28.3	32.8	4.03609		625500	19.8	38.3	38.3	32.1333	10.681		625500	37.2	27.4	27.4	30.6667	5.65803
	626000	41.2	29.4	29.4	33.3333	6.81273		626000	37.2	32.4	32.4	34	2.77128		626000	23.1	29.3	29.3	27.2333	3.57957		626000	32.6	30.7	30.7	31.3333	1.09697
	626500	48.5	29	29	35.5	11.2583		626500	35.2	35.2	31.4	33.9333	2.19393		626500	11.2	37.5	37.5	28.7333	15.1843		626500	22.5	16.9	16.9	18.7667	3.23316
	627000	38.6	21	21	26.8667	10.1614		627000	50.8	44.8	42.9	46.1667	4.12351		627000	15.3	36.9	35.1	29.1	11.985		627000	26.7	22.4	20.9	23.3333	3.01054
	627500	38	25.7	25.7	29.8	7.10141		627500	39.5	35.7	31.9	35.7	3.8		627500	14.5	27.9	27.9	23.4333	7.73649		627500	33.6	28.5	28.5	30.2	2.94449
	628000	32.7	25.4	25.4	27.8333	4.21466		628000	35.1	31.2	29.2	31.8333	3.00056		628000	28	25.9	24.2	26.0333	1.90351		628000	31.4	29.7	27.9	29.6667	1.75024
	628500	39.5	30.6	30.6	33.5667	5.13842		628500	46.7	41	36.4	41.3667	5.15978		628500	27.2	37.2	37.2	33.8667	5.7735		628500	21.4	19.3	18.6	19.7667	1.45717
	629000	43.3	25.5	25.5	31.4333	10.2768		629000	39.1	33.9	32.1	35.0333	3.63501		629000	14.2	31.3	31.3	25.6	9.87269		629000	32.5	25.5	25.5	27.8333	4.04145
	629500	38.5	28.1	28.1	31.5667	6.00444		629500	46.7	40.7	37.3	41.5667	4.75955		629500	23.8	31.3	31.3	28.8	4.33013		629500	37.2	31	31	33.0667	3.57957
	630000	41.8	26.3	26.3	31.4667	8.94893		630000	61.7	54.1	52.4	56.0667	4.9521		630000	17.7	37.6	35.6	30.3	10.9576		630000	25.4	23.4	23.4	24.0667	1.1547
	630500	33.7	20.4	20.4	24.8333	7.67876		630500	52.4	44.6	40.8	45.9333	5.91383		630500	24.8	27.9	26.1	26.2667	1.55671		630500	44.1	38.2	38.2	40.1667	3.40637
	631000	39.5	22.3	22.3	28.0333	9.93042		631000	39.8	39.8	39.8	39.8	0		631000	23.5	33.1	31.3	29.3	5.10294		631000	32.2	30.2	30.2	30.8667	1.1547
	631500	36.8	25.2	25.2	29.0667	6.69726		631500	43.1	41.3	36.4	40.2667	3.46747		631500	18.2	45.7	43.7	35.8667	15.3324		631500	27	25.2	25.2	25.8	1.03923
	632000	40.5	27	25.1	30.8667	8.39663		632000	49.5	47.6	43.9	47	2.84781		632000	21.1	38.8	38.8	32.9	10.2191		632000	19.8	18.1	18.1	18.6667	0.981495
	632500	35	31.2	31.2	32.4667	2.19393		632500	41.8	40	36.1	39.3	2.91376		632500	31.1	26.1	26.1	27.7667	2.88675		632500	38.8	33.2	33.2	35.0667	3.23316
	633000	43.5	28.5	28.5	33.5	8.66025		633000	42.7	39.2	35.5	39.1333	3.60046		633000	29.1	28.7	27	28.2667	1.11505		633000	36.9	33.2	33.2	34.4333	2.1362
	633500	39.4	32.9	32.9	35.0667	3.75278		633500	41.2	39.2	31.3	37.2333	5.23482		633500	22.6	20.1	19.3	20.6667	1.72143		633500	25.3	21.9	21.9	23.0333	1.96299
	634000	44.4	31	31	35.4667	7.73649		634000	43.1	41.2	36.8	40.3667	3.23161		634000	31.6	38.6	38.6	36.2667	4.04145		634000	23.3	21.4	21.4	22.0333	1.09697
	634500	46.3	30.8	30.8	35.9667	8.94893		634500	31.2	31.2	29.2	30.5333	1.1547		634500	15.4	30.8	28.9	25.0333	8.39663		634500	38	38	38	38	0
	635000	47.4	29.6	29.6	35.5333	10.2768		635000	38.3	36.5	34.7	36.5	1.8		635000	19	31.4	29.6	26.6667	6.70025		635000	24.3	22.2	22.2	22.9	1.21244
	635500	42.6	27.7	27.7	32.6667	8.60252		635500	46.5	42.9	39.2	42.8667	3.65011		635500	26.6	34.4	32.7	31.2333	4.10163		635500	32.5	25.8	25.8	28.0333	3.86825
	636000	35.5	25.6	25.6	28.9	5.71577		636000	46.1	41.7	39.2	42.3333	3.49333		636000	27.3	30.7	30.7	29.5667	1.96299		636000	42.6	36.6	34.7	37.9667	4.12351
	636500	41.8	27.3	27.3	32.1333	8.37158		636500	46.7	44.8	40.8	44.1	3.01164		636500	19.7	31	31	27.2333	6.52406		636500	42.7	39.7	37.3	39.9	2.70555
	637000	33.1	23	21.2	25.7667	6.41431		637000	43.7	37.9	30.3	37.3	6.72012		637000	26.5	31.5	29.9	29.3	2.55343		637000	21.5	18.5	18.5	19.5	1.73205
	637500	47.8	30.6	30.6	36.3333	9.93042		637500	49.5	45.5	37.6	44.2	6.05558		637500	22.3	37.2	37.2	32.2333	8.60252		637500	27.3	25.5	25.5	26.1	1.03923
	638000	44.2	26.9	26.9	32.6667	9.98816		638000	45.2	39.8	34.5	39.8333	5.35008		638000	19.2	29.2	29.2	25.8667	5.7735		638000	33.7	29.9	29.9	31.1667	2.19393
	638500	36.9	28.3	28.3	31.1667	4.96521		638500	50.8	48.8	42.4	47.3333	4.38786		638500	16.3	37.7	37.7	30.5667	12.3553		638500	37.6	35.6	35.6	36.2667	1.1547
	639000	43.7	18.8	18.8	27.1	14.376		639000	40.3	36.6	31.2	36.0333	4.57639		639000	18.6	43.5	41.7	34.6	13.8856		639000	20.8	18.9	18.9	19.5333	1.09697
	639500	43.5	25.1	23.3	30.6333	11.1791		639500	49.5	45.9	42.2	45.8667	3.65011		639500	23.3	28.2	26.4	25.9667	2.47857		639500	36.6	32.8	32.8	34.0667	2.19393
	640000	35.2	25.9	25.9	29	5.36936		640000	50.5	48.5	48.5	49.1667	1.1547		640000	23.7	25.4	23.6	24.2333	1.0116		640000	31.3	31.3	29.3	30.6333	1.1547
	640500	32.8	27.3	25.5	28.5333	3.80307		640500	31.7	29.9	27.5	29.7	2.10713		640500	24.3	26.5	22.6	24.4667	1.95533		640500	41.7	37.9	35.7	38.4333	3.03535
	641000	41.8	28.5	28.5	32.9333	7.67876		641000	40.2	40.2	36.5	38.9667	2.1362		641000	24.2	31.3	31.3	28.9333	4.09919		641000	35	25.8	25.8	28.8667	5.31162
	641500	37.9	25.3	25.3	29.5	7.27461		641500	39.7	39.7	34	37.8	3.2909		641500	12.2	31.2	31.2	24.8667	10.9697		641500	36.1	34.6	34.6	35.1	0.866025
	642000	37.7	22.4	22.4	27.5	8.83346		642000	39.5	33.9	26.6	33.3333	6.46864		642000	19.5	18.3	18.3	18.7	0.69282		642000	34.1	28.4	28.4	30.3	3.2909
	642500	35.6	20.4	20.4	25.4667	8.77572		642500	37.5	35.6	33.7	35.6	1.9		642500	25.2	31	26.1	27.4333	3.12143		642500	33.4	33.4	33.4	33.4	0
	643000	30.4	18.1	18.1	22.2	7.10141		643000	47.4	45.5	45.5	46.1333	1.09697		643000	26	30	28.2	28.0667	2.00333		643000	24.4	24.4	24.4	24.4	4.35117e-15
	643500	45.7	24.8	24.8	31.7667	12.0666		643500	29.2	27.4	23.8	26.8	2.74955		643500	20.9	30	30	26.9667	5.25389		643500	36.4	32.6	32.6	33.8667	2.19393
	644000	38.3	27	27	30.7667	6.52406		644000	40.2	38.2	36.2	38.2	2		644000	20.2	31	31	27.4	6.23538		644000	30.5	24.8	24.8	26.7	3.2909
	644500	39.4	23.6	23.6	28.8667	9.12213		644500	36.4	34.4	30.6	33.8	2.94618		644500	15.6	27.2	27.2	23.3333	6.69726		644500	33.6	29.1	29.1	30.6	2.59808
	645000	39.2	26.7	26.7	30.8667	7.21688		645000	33	33	27.8	31.2667	3.00222		645000	22.4	28.3	28.3	26.3333	3.40637		645000	29.9	21.6	21.6	24.3667	4.79201
	645500	35	23.9	23.9	27.6	6.40859		645500	49.3	45.7	44.4	46.4667	2.53837		645500	17.4	34.1	34.1	28.5333	9.64175		645500	41.3	31.7	31.7	34.9	5.54256
	646000	38.9	27.2	27.2	31.1	6.755		646000	48.8	42.9	33.1	41.6	7.93032		646000	22.9	36.5	32.7	30.7	7.01712		646000	32.2	27	27	28.7333	3.00222
	646500	52.1	26	26	34.7	15.0688		646500	54.6	54.6	54.6	54.6	0		646500	25.1	34.1	34.1	31.1	5.19615		646500	25.7	25.7	25.7	25.7	0
	647000	35.5	24.3	24.3	28.0333	6.46632		647000	37.7	37.7	35.8	37.0667	1.09697		647000	37.6	38.9	37	37.8333	0.971253		647000	26.2	21.3	21.3	22.9333	2.82902
	647500	39.2	26.1	26.1	30.4667	7.56329		647500	54.3	50.8	48.8	51.3	2.78388		647500	27.9	25.4	25.4	26.2333	1.44338		647500	23	21.1	21.1	21.7333	1.09697
	648000	31.1	22.8	22.8	25.5667	4.79201		648000	40.2	34.1	34.1	36.1333	3.52184		648000	24.6	31.5	27.9	28	3.45109		648000	26.8	23.6	23.6	24.6667	1.84752
	648500	41.3	26	26	31.1	8.83346		648500	45.2	37.3	37.3	39.9333	4.56107		648500	27.6	27	27	27.2	0.34641		648500	29.5	24.4	24.4	26.1	2.94449
	649000	39.1	29.4	29.4	32.6333	5.6003		649000	40.8	35.2	33.3	36.4333	3.89915		649000	20.2	27.8	27.8	25.2667	4.38786		649000	36.4	34.4	34.4	35.0667	1.1547
	649500	39.1	26	26	30.3667	7.56329		649500	48.3	41	39.1	42.8	4.85695		649500	24.9	28.4	28.4	27.2333	2.02073		649500	29.3	26.7	26.7	27.5667	1.50111
	650000	31.9	24.4	24.4	26.9	4.33013		650000	47.2	45.5	38.8	43.8333	4.4411		650000	23.9	29.9	29.9	27.9	3.4641		650000	34.5	30.6	30.6	31.9	2.25167
	650500	40.5	30.7	30.7	33.9667	5.65803		650500	39.5	37.6	31.6	36.2333	4.12351		650500	20.1	31.8	31.8	27.9	6.755		650500	35.3	31.7	31.7	32.9	2.07846
	651000	33.9	19.6	19.6	24.3667	8.25611		651000	46.7	41.5	39.7	42.6333	3.63501		651000	23.3	29.6	27.9	26.9333	3.25935		651000	30.8	29	27.2	29	1.8
	651500	41.2	25.3	25.3	30.6	9.17987		651500	50.5	50.5	48.5	49.8333	1.1547		651500	25.4	24.6	24.6	24.8667	0.46188		651500	36.2	32.4	32.4	33.6667	2.19393
	652000	29.7	25.8	25.8	27.1	2.25167		652000	42.6	40.7	38.8	40.7	1.9		652000	25.3	31.1	29.2	28.5333	2.95691		652000	45.2	38.6	38.6	40.8	3.81051
	652500	44.1	33	31.2	36.1	6.98642		652500	51.3	47.4	42	46.9	4.67012		652500	25.8	23.8	23.8	24.4667	1.1547		652500	33.4	22.2	22.2	25.9333	6.46632
	653000	33.7	20.3	20.3	24.7667	7.73649		653000	53.8	49.8	44.1	49.2333	4.87476		653000	21.6	22.3	22.3	22.0667	0.404145		653000	33.2	25.8	24	27.6667	4.87579
	653500	35	26.2	26.2	29.1333	5.08068		653500	43.7	41.7	33	39.4667	5.68888		653500	24.3	35.8	35.8	31.9667	6.63953		653500	36.2	34.2	34.2	34.8667	1.1547
	654000	32.5	25.3	25.3	27.7	4.15692		654000	36.5	34.6	32.8	34.6333	1.85023		654000	22.2	27.7	24.2	24.7	2.78388		654000	25.2	24.2	22.5	23.9667	1.36504
	654500	35.5	21.7	21.7	26.3	7.96743		654500	41.5	39.5	35.8	38.9333	2.89194		654500	20.6	28.5	28.5	25.8667	4.56107		654500	29.1	27.1	27.1	27.7667	1.1547
	655000	37.2	19	19	25.0667	10.5078		655000	38.9	38.9	31.4	36.4	4.33013		655000	26.7	29	27.2	27.6333	1.20968		655000	36.9	33	33	34.3	2.25167
	655500	45.5	24.3	22.6	30.8	12.7589		655500	40.5	40.5	36.6	39.2	2.25167		655500	19.6	33.6	33.6	28.9333	8.0829		655500	35	29.9	29.9	31.6	2.94449
	656000	48.1	26.9	26.9	33.9667	12.2398		656000	47.8	46.1	42.6	45.5	2.65141		656000	23.3	42.9	42.9	36.3667	11.3161		656000	30.3	26.5	26.5	27.7667	2.19393
	656500	33	22.4	22.4	25.9333	6.11991		656500	44.2	38.5	36.5	39.7333	3.99541		656500	12.9	29	27.3	23.0667	8.84553		656500	33.1	27.6	27.6	29.4333	3.17543
	657000	34.6	23	23	26.8667	6.69726		657000	46.9	43.1	39.1	43.0333	3.90043		657000	26	19.3	17.5	20.9333	4.47921		657000	37.5	32.3	32.3	34.0333	3.00222
	657500	37.3	22.4	22.4	27.3667	8.60252		657500	47.2	47.2	43.3	45.9	2.25167		657500	31.2	33.3	33.3	32.6	1.21244		657500	38	34.6	34.6	35.7333	1.96299
	658000	43.5	23.6	23.6	30.2333	11.4893		658000	49	47.2	43.3	46.5	2.91376		658000	23.5	27.9	27.9	26.4333	2.54034		658000	20.1	17.4	17.4	18.3	1.55885
	658500	45.5	31.8	31.8	36.3667	7.9097		658500	46.7	44.8	44.8	45.4333	1.09697		658500	17.2	41	41	33.0667	13.7409		658500	27.1	21.6	21.6	23.4333	3.17543
	659000	44.2	26.9	26.9	32.6667	9.98816		659000	43.9	42	36.2	40.7	4.01123		659000	12.7	30.5	30.5	24.5667	10.2768		659000	23.4	21.7	21.7	22.2667	0.981495
	659500	39.5	32.9	32.9	35.1	3.81051		659500	42.9	35.3	31.6	36.6	5.76108		659500	17.4	41.7	39.7	32.9333	13.4894		659500	20.2	20.2	20.2	20.2	0
	660000	41.7	22.3	22.3	28.7667	11.2006		660000	35.1	33.2	29.5	32.6	2.84781		660000	26	27.3	27.3	26.8667	0.750555		660000	17.8	14.6	14.6	15.6667	1.84752
	660500	37.7	29.4	29.4	32.1667	4.79201		660500	46.3	46.3	42.6	45.0667	2.1362		660500	29	30.3	28.4	29.2333	0.971253		660500	25.9	24.1	24.1	24.7	1.03923
	661000	42.6	25.1	25.1	30.9333	10.1036		661000	46.7	46.7	46.7	46.7	8.70234e-15		661000	20.8	25	21.1	22.3	2.34307		661000	36.2	25.8	25.8	29.2667	6.00444
	661500	37.3	25.4	25.4	29.3667	6.87047		661500	41.7	39.7	36	39.1333	2.89194		661500	27.9	37.3	37.3	34.1667	5.42709		661500	18	13.5	13.5	15	2.59808
	662000	37.7	26.5	26.5	30.2333	6.46632		662000	43.9	36.8	33.3	38	5.40093		662000	33.1	33.3	31.3	32.5667	1.10151		662000	32.5	30.7	30.7	31.3	1.03923
	662500	38.3	32.8	32.8	34.6333	3.17543		662500	43.9	40.2	36.5	40.2	3.7		662500	19.9	28.3	26.7	24.9667	4.46019		662500	34	30.2	30.2	31.4667	2.19393
	663000	35.2	30.4	30.4	32	2.77128		663000	46.3	39.7	34	40	6.15549		663000	32.2	31.7	30.1	31.3333	1.09697		663000	35.6	31.9	31.9	33.1333	2.1362
	663500	36.2	28.5	28.5	31.0667	4.4456		663500	60.2	56.5	50.5	55.7333	4.89524		663500	20.7	34.2	34.2	29.7	7.79423		663500	32.2	31	31	31.4	0.69282
	664000	44.4	27.3	27.3	33	9.87269		664000	42.7	42.7	38.9	41.4333	2.19393		664000	29.2	37.2	35.6	34	4.2332		664000	27.1	27.1	25.3	26.5	1.03923
	664500	34.4	19.9	19.9	24.7333	8.37158		664500	48.8	45	43.1	45.6333	2.9023		664500	27.4	26.8	26.8	27	0.34641		664500	28.7	27	25.3	27	1.7
	665000	40.5	25.1	25.1	30.2333	8.89119		665000	49.8	46.1	38.3	44.7333	5.87055		665000	17.2	33.4	33.4	28	9.35307		665000	31.5	26	26	27.8333	3.17543
	665500	36.4	29.2	29.2	31.6	4.15692		665500	45.5	43.5	41.5	43.5	2		665500	17.6	31.4	29.6	26.2	7.502		665500	42.7	34.8	34.8	37.4333	4.56107
	666000	38.2	28.6	28.6	31.8	5.54256		666000	45.9	43.9	36.2	42	5.12152		666000	13.4	27.5	27.5	22.8	8.14064		666000	35.5	30.2	30.2	31.9667	3.05996
	666500	33.3	31.6	31.6	32.1667	0.981495		666500	44.6	42.7	40.8	42.7	1.9		666500	19.7	37	37	31.2333	9.98816		666500	27.9	26	26	26.6333	1.09697
	667000	41.7	22.7	22.7	29.0333	10.9697		667000	50	44.4	42.6	45.6667	3.85919		667000	27.9	40.7	40.7	36.4333	7.39008		667000	38.3	34.5	34.5	35.7667	2.19393
	667500	34.2	24.7	24.7	27.8667	5.48483		667500	43.1	39.2	33.2	38.5	4.98698		667500	19.2	32.9	32.9	28.3333	7.9097		667500	31.9	28.2	28.2	29.4333	2.1362
	668000	37	24.7	24.7	28.8	7.10141		668000	44.4	41	39.2	41.5333	2.64071		668000	24.9	31.5	31.5	29.3	3.81051		668000	22.7	20.7	20.7	21.3667	1.1547
	668500	46.5	36.8	36.8	40.0333	5.6003		668500	39.4	37.6	34	37	2.74955		668500	25.4	27.2	25.6	26.0667	0.986577		668500	32.8	21.2	21.2	25.0667	6.69726
	669000	40.7	30.4	30.4	33.8333	5.94671		669000	45.2	45.2	43.3	44.5667	1.09697		669000	14.7	34.2	32.4	27.1	10.7764		669000	22.8	20.7	20.7	21.4	1.21244
	669500	38.2	26.7	26.7	30.5333	6.63953		669500	49	43.5	41.5	44.6667	3.88373		669500	13.7	30.7	30.7	25.0333	9.81495		669500	33.3	29.6	29.6	30.8333	2.1362
	670000	41	27.3	27.3	31.8667	7.9097		670000	45.5	45.5	41.7	44.2333	2.19393		670000	26.7	36.9	36.9	33.5	5.88897		670000	37.5	37.5	35.5	36.8333	1.1547
	670500	40	28.6	28.6	32.4	6.58179		670500	40.8	38.9	37	38.9	1.9		670500	21.8	25.8	25.8	24.4667	2.3094		670500	25.9	24	24	24.6333	1.09697
	671000	36.5	29.6	29.6	31.9	3.98372		671000	45.2	43.3	41.3	43.2667	1.95021		671000	21.1	32.7	32.7	28.8333	6.69726		671000	38.6	32.9	32.9	34.8	3.2909
	671500	32.6	25.4	25.4	27.8	4.15692		671500	34.5	32.7	30.9	32.7	1.8		671500	23.3	35.1	35.1	31.1667	6.81273		671500	35.6	35.6	35.6	35.6	0
	672000	33	23.8	23.8	26.8667	5.31162		672000	47.2	47.2	37.3	43.9	5.71577		672000	23.3	41.3	41.3	35.3	10.3923		672000	40.7	27.9	27.9	32.1667	7.39008
	672500	34.1	25.6	25.6	28.4333	4.90748		672500	38.3	36.5	36.5	37.1	1.03923		672500	19.9	36.4	36.4	30.9	9.52628		672500	27.8	17.5	17.5	20.9333	5.94671
	673000	27.8	26	26	26.6	1.03923		673000	48.8	46.9	46.9	47.5333	1.09697		673000	37.2	35.8	33.9	35.6333	1.6563		673000	27.1	19.3	19.3	21.9	4.50333
	673500	45.5	28.3	28.3	34.0333	9.93042		673500	52.1	46.7	43.1	47.3	4.5299		673500	25.9	27.7	25.9	26.5	1.03923		673500	34.4	32.5	32.5	33.1333	1.09697
	674000	40.8	29.7	29.7	33.4	6.40859		674000	47.8	45.9	42	45.2333	2.95691		674000	22.6	30.6	29.1	27.4333	4.25245		674000	27.2	21.7	21.7	23.5333	3.17543
	674500	40.8	25.3	25.3	30.4667	8.94893		674500	49.3	45.5	43.7	46.1667	2.8589		674500	31.6	24	18.5	24.7	6.57799		674500	27.5	25.7	25.7	26.3	1.03923
	675000	32.4	19	19	23.4667	7.73649		675000	34.2	32.3	30.4	32.3	1.9		675000	26.2	28.8	27.3	27.4333	1.30512		675000	31.6	27.9	27.9	29.1333	2.1362
	675500	32.5	30.7	30.7	31.3	1.03923		675500	38	32.3	29.2	33.1667	4.46356		675500	28.7	26.7	26.7	27.3667	1.1547		675500	39.2	29	29	32.4	5.88897
	676000	37	23.6	23.6	28.0667	7.73649		676000	42.4	39.5	37.9	39.9333	2.28108		676000	23.5	42.6	42.6	36.2333	11.0274		676000	25.6	20.4	20.4	22.1333	3.00222
	676500	34	26.4	26.4	28.9333	4.38786		676500	36.4	32.5	27.2	32.0333	4.61772		676500	18	42.6	42.6	34.4	14.2028		676500	22.7	22.7	22.7	22.7	0
	677000	40.3	28.2	28.2	32.2333	6.98594		677000	44.8	44.8	35.5	41.7	5.36936		677000	13.6	27.9	27.9	23.1333	8.25611		677000	33.7	31.9	31.9	32.5	1.03923
	677500	44.4	28.4	28.4	33.7333	9.2376		677500	32.5	32.5	30.5	31.8333	1.1547		677500	9.5	34.1	34.1	25.9	14.2028		677500	27.9	27.9	27.9	27.9	4.35117e-15
	678000	40.7	29.5	29.5	33.2333	6.46632		678000	34.8	32.4	32.4	33.2	1.38564		678000	17.2	23.6	21.8	20.8667	3.30051		678000	29.7	25.7	25.7	27.0333	2.3094
	678500	40.3	24.9	24.9	30.0333	8.89119		678500	33.9	30.3	26.7	30.3	3.6		678500	22.4	36.5	36.5	31.8	8.14064		678500	37.7	32.3	32.3	34.1	3.11769
	679000	36.1	24.1	24.1	28.1	6.9282		679000	37.2	32.7	30.9	33.6	3.245		679000	21.9	34.8	34.8	30.5	7.44782		679000	30.8	27.1	27.1	28.3333	2.1362
	679500	38.8	27.5	27.5	31.2667	6.52406		679500	39.7	36.1	32.5	36.1	3.6		679500	30.4	28.7	28.7	29.2667	0.981495		679500	23.3	23.3	23.3	23.3	0
	680000	32.7	19.8	19.8	24.1	7.44782		680000	43.9	36.5	34.7	38.3667	4.87579		680000	26.2	34.4	34.4	31.6667	4.73427		680000	41.5	37.7	37.7	38.9667	2.19393
	680500	46.9	28.2	28.2	34.4333	10.7965		680500	33.2	31.3	31.3	31.9333	1.09697		680500	21	26.8	26.8	24.8667	3.34863		680500	20	16.4	16.4	17.6	2.07846
	681000	34.8	23.9	23.9	27.5333	6.29312		681000	46.3	42.4	40.5	43.0667	2.95691		681000	24.8	26.5	26.5	25.9333	0.981495		681000	31.8	26.2	26.2	28.0667	3.23316
	681500	42.7	20.6	20.6	27.9667	12.7594		681500	37.2	37.2	33.2	35.8667	2.3094		681500	23.3	30.1	28.3	27.2333	3.52326		681500	34.2	34.2	34.2	34.2	0
	682000	35	15.2	15.2	21.8	11.4315		682000	40.5	34.6	30.8	35.3	4.88774		682000	22.8	31.1	31.1	28.3333	4.79201		682000	28	24.8	24.8	25.8667	1.84752
	682500	46.5	27.9	27.9	34.1	10.7387		682500	53.8	50	50	51.2667	2.19393		682500	31.4	34.2	34.2	33.2667	1.61658		682500	31.2	31.2	31.2	31.2	0
	683000	37.7	26.4	26.4	30.1667	6.52406		683000	50.3	48.3	46.5	48.3667	1.90088		683000	32.9	32.9	27	30.9333	3.40637		683000	24	23.5	23.5	23.6667	0.288675
	683500	40.7	30.9	30.9	34.1667	5.65803		683500	46.3	46.3	39.5	44.0333	3.92598		683500	23.4	28.7	26.6	26.2333	2.66896		683500	26	22.8	22.8	23.8667	1.84752
	684000	35.3	26	26	29.1	5.36936		684000	42.9	41.2	39.2	41.1	1.85203		684000	23.2	26.5	24.8	24.8333	1.65025		684000	20.6	18	18	18.8667	1.50111
	684500	35.8	30.2	30.2	32.0667	3.23316		684500	46.1	44.1	40.3	43.5	2.94618		684500	21.8	31.5	31.5	28.2667	5.6003		684500	25.6	23.8	23.8	24.4	1.03923
	685000	38.8	23.3	23.3	28.4667	8.94893		685000	39.8	36.1	31.3	35.7333	4.26185		685000	24.8	35.5	33.7	31.3333	5.72917		685000	32.4	22.8	22.8	26	5.54256
	685500	36.9	24.8	22.9	28.2	7.59408		685500	44.8	41	37.3	41.0333	3.75011		685500	36.8	30.1	30.1	32.3333	3.86825		685500	27.2	27.2	27.2	27.2	0
	686000	39.8	29.9	29.9	33.2	5.71577		686000	50.5	46.5	40.7	45.9	4.92747		686000	20.2	38.8	38.8	32.6	10.7387		686000	28.5	26.7	26.7	27.3	1.03923
	686500	33.9	26.4	26.4	28.9	4.33013		686500	49.3	41.7	37.9	42.9667	5.8046		686500	18.9	32.7	32.7	28.1	7.96743		686500	27.3	25	25	25.7667	1.32791
	687000	44.8	34.7	34.7	38.0667	5.83124		687000	45.7	43.7	35.7	41.7	5.2915		687000	31.3	40.2	40.2	37.2333	5.13842		687000	34.4	28.7	28.7	30.6	3.2909
	687500	43.9	25.6	25.6	31.7	10.5655		687500	44.2	42.2	40.3	42.2333	1.95021		687500	23.8	32.1	30.2	28.7	4.34856		687500	31.7	26.2	26.2	28.0333	3.17543
	688000	48.3	26	26	33.4333	12.8749		688000	35.1	31.3	29.5	31.9667	2.8589		688000	36.2	26.1	26.1	29.4667	5.83124		688000	33.4	31.5	31.5	32.1333	1.09697
	688500	39.4	25.2	25.2	29.9333	8.19837		688500	50.3	48.3	44.2	47.6	3.10966		688500	28.7	32.6	32.6	31.3	2.25167		688500	35.3	31.6	31.6	32.8333	2.1362
	689000	36.8	23.3	23.3	27.8	7.79423		689000	44.1	42.2	38.6	41.6333	2.79344		689000	26.1	36.4	34.6	32.3667	5.50121		689000	31.3	25.1	23.3	26.5667	4.19682
	689500	41.7	23.1	23.1	29.3	10.7387		689500	43.9	41.2	39.2	41.4333	2.35867		689500	18.3	24.9	24.9	22.7	3.81051		689500	34.8	28.2	26.1	29.7	4.53982
	690000	44.4	34.4	34.4	37.7333	5.7735		690000	44.8	42.9	41.2	42.9667	1.80093		690000	24.6	35.8	33.8	31.4	5.97327		690000	20.2	16.1	16.1	17.4667	2.36714
	690500	39.4	26.2	26.2	30.6	7.62102		690500	43.7	38	36.1	39.2667	3.95517		690500	11.5	36	34.1	27.2	13.6297		690500	22	19.2	19.2	20.1333	1.61658
	691000	37.9	24.6	24.6	29.0333	7.67876		691000	38.5	38.5	33.2	36.7333	3.05996		691000	15	25.1	23.6	21.2333	5.45008		691000	31.3	24.8	24.8	26.9667	3.75278
	691500	31.5	24.2	24.2	26.6333	4.21466		691500	35.2	35.2	34.8	35.0667	0.23094		691500	29.5	30.1	30	29.8667	0.321455		691500	23	19.7	18.1	20.2667	2.49867
	692000	44.6	27.2	27.2	33	10.0459		692000	41.7	36	32.2	36.6333	4.78156		692000	27.9	31.2	29.3	29.4667	1.6563		692000	22.4	18.7	18.7	19.9333	2.1362
	692500	42.7	27.5	27.5	32.5667	8.77572		692500	39.4	34	33.4	35.6	3.30454		692500	24	31.3	29.4	28.2333	3.78726		692500	27.3	27.3	25.4	26.6667	1.09697
	693000	50.5	29.2	29.2	36.3	12.2976		693000	40	36.4	34.6	37	2.74955		693000	19.2	40.2	40.2	33.2	12.1244		693000	32.4	27	25.8	28.4	3.51568
	693500	39.7	28.3	28.3	32.1	6.58179		693500	48.1	48.1	46.1	47.4333	1.1547		693500	13.9	34.4	32.5	26.9333	11.3271		693500	28.8	25.4	25.4	26.5333	1.96299
	694000	49.3	30.1	30.1	36.5	11.0851		694000	35.7	28.2	26.2	30.0333	5.00833		694000	22.6	28.6	26.8	26	3.07896		694000	35.1	29.2	29.2	31.1667	3.40637
	694500	43.9	26.9	26.9	32.5667	9.81495		694500	33.2	31.4	27.9	30.8333	2.69506		694500	21.4	26.6	26.6	24.8667	3.00222		694500	32.4	32.4	32.4	32.4	0
	695000	42.7	31.6	31.6	35.3	6.40859		695000	41.7	39.7	36	39.1333	2.89194		695000	35.1	31.2	29.3	31.8667	2.95691		695000	31	27.3	27.3	28.5333	2.1362
	695500	52.9	37.7	37.7	42.7667	8.77572		695500	48.8	48.8	48.8	48.8	8.70234e-15		695500	30.4	27.8	27.8	28.6667	1.50111		695500	25.4	21.6	21.6	22.8667	2.19393
	696000	31.5	22.5	22.5	25.5	5.19615		696000	51	51	51	51	0		696000	28.4	28.1	28.1	28.2	0.173205		696000	33.1	24.1	24.1	27.1	5.19615
	696500	39.5	25.1	25.1	29.9	8.31384		696500	45.5	43.7	40	43.0667	2.80416		696500	22.2	38.3	38.3	32.9333	9.29534		696500	24.5	18.7	18.7	20.6333	3.34863
	697000	42.9	26.4	26.4	31.9	9.52628		697000	39.2	37.3	35.3	37.2667	1.95021		697000	31.3	38.6	38.6	36.1667	4.21466		697000	27.5	25.7	24.4	25.8667	1.55671
	697500	38.5	22.7	22.7	27.9667	9.12213		697500	46.5	44.6	42.4	44.5	2.05183		697500	27.2	35.6	31.9	31.5667	4.20991		697500	27.5	23.9	22.1	24.5	2.74955
	698000	41.8	29.1	29.1	33.3333	7.33235		698000	37.3	35.6	30.2	34.3667	3.7072		698000	22.6	26.1	26.1	24.9333	2.02073		698000	41.8	36.9	36.9	38.5333	2.82902
	698500	36.1	28.3	28.3	30.9	4.50333		698500	44.6	41.2	39.2	41.6667	2.73008		698500	13.4	35.7	35.7	28.2667	12.8749		698500	29.2	21.4	21.4	24	4.50333
	699000	35.7	28.6	28.6	30.9667	4.09919		699000	40	38.2	38.2	38.8	1.03923		699000	14.6	31.6	31.6	25.9333	9.81495		699000	22.2	20.1	20.1	20.8	1.21244
	699500	40	20.8	20.8	27.2	11.0851		699500	40.2	37.6	32.4	36.7333	3.97157		699500	35.1	45.2	43.3	41.2	5.36749		699500	30	28.2	28.2	28.8	1.03923
	700000	31.3	17.3	17.3	21.9667	8.0829		700000	48.3	44.6	41	44.6333	3.65011		700000	28.2	33.6	33.6	31.8	3.11769		700000	28.9	27	27	27.6333	1.09697
	700500	41.8	27.4	25.6	31.6	8.87919		700500	40.3	34.5	32.6	35.8	4.01123		700500	23.1	21	21	21.7	1.21244		700500	34.6	26.4	26.4	29.1333	4.73427
	701000	26.2	22.4	22.4	23.6667	2.19393		701000	44.6	44.6	35.1	41.4333	5.48483		701000	24.5	34.7	34.7	31.3	5.88897		701000	24.3	17.3	17.3	19.6333	4.04145
	701500	37.9	24.1	24.1	28.7	7.96743		701500	34.2	32.3	28.5	31.6667	2.9023		701500	24.2	32.9	31.1	29.4	4.59239		701500	42.6	32.1	32.1	35.6	6.06218
	702000	38.5	29.1	29.1	32.2333	5.42709		702000	43.9	36.5	34.7	38.3667	4.87579		702000	25.6	34.5	34.5	31.5333	5.13842		702000	23.4	19.5	19.5	20.8	2.25167
	702500	31.6	20.5	20.5	24.2	6.40859		702500	41.5	38.3	38.3	39.3667	1.84752		702500	19.9	35	35	29.9667	8.71799		702500	29.9	26.1	26.1	27.3667	2.19393
	703000	39.7	23.6	21.8	28.3667	9.85613		703000	38.2	34.4	34.4	35.6667	2.19393		703000	24.5	37	37	32.8333	7.21688		703000	32.9	27.7	27.7	29.4333	3.00222
	703500	35.6	22.4	22.4	26.8	7.62102		703500	41.3	41.3	37.9	40.1667	1.96299		703500	15.8	32.4	32.4	26.8667	9.58401		703500	31.3	22.2	22.2	25.2333	5.25389
	704000	43.9	26.5	26.5	32.3	10.0459		704000	39.2	37.3	37.3	37.9333	1.09697		704000	25.4	32.5	32.5	30.1333	4.09919		704000	22.7	15.7	15.7	18.0333	4.04145
	704500	42.4	28.9	28.9	33.4	7.79423		704500	43.9	38	36.2	39.3667	4.02782		704500	29.9	29.9	28.1	29.3	1.03923		704500	18.3	14.7	14.7	15.9	2.07846
	705000	48.8	24	24	32.2667	14.3183		705000	38.2	36.4	32.8	35.8	2.74955		705000	16.8	30.9	30.9	26.2	8.14064		705000	20.5	20.5	20.5	20.5	0
	705500	46.3	27.1	25.3	32.9	11.6396		705500	34.8	29	27.1	30.3	4.01123		705500	27.7	33.2	31.3	30.7333	2.79344		705500	28.6	26.9	26.9	27.4667	0.981495
	706000	34.6	26.2	26.2	29	4.84974		706000	37.9	32.2	24.6	31.5667	6.67258		706000	18.9	38.9	38.9	32.2333	11.547		706000	21.9	20.1	20.1	20.7	1.03923
	706500	39.8	24.5	24.5	29.6	8.83346		706500	42.2	42.2	34.6	39.6667	4.38786		706500	11.8	34.5	32.8	26.3667	12.6437		706500	28.7	25.6	25.6	26.6333	1.78979
	707000	40.2	28.2	28.2	32.2	6.9282		707000	39.5	37.7	35.2	37.4667	2.15948		707000	24.8	34.7	34.7	31.4	5.71577		707000	25.7	22	22	23.2333	2.1362
	707500	33.1	26.1	26.1	28.4333	4.04145		707500	44.2	35.7	33.9	37.9333	5.50121		707500	18.8	31.4	27.6	25.9333	6.46323		707500	23.6	19.6	19.6	20.9333	2.3094
	708000	39.5	23.3	23.3	28.7	9.35307		708000	37	31.7	31.7	33.4667	3.05996		708000	23.1	30.2	28.3	27.2	3.6756		708000	27.2	25.4	24.2	25.6	1.50997
	708500	44.6	27.2	27.2	33	10.0459		708500	41	34.5	34.5	36.6667	3.75278		708500	29	30.2	30.2	29.8	0.69282		708500	38.8	35.1	33.2	35.7	2.84781
	709000	44.6	26	26	32.2	10.7387		709000	44.8	43.1	41.3	43.0667	1.75024		709000	27.7	36.5	36.5	33.5667	5.08068		709000	26.4	23.9	23.9	24.7333	1.44338
	709500	46.9	31.2	31.2	36.4333	9.0644		709500	40.7	38.9	37.2	38.9333	1.75024		709500	22.6	27.5	25.8	25.3	2.48797		709500	31.1	27.4	27.4	28.6333	2.1362
	710000	46.3	28.4	28.4	34.3667	10.3346		710000	37.5	35.5	33.4	35.4667	2.0502		710000	27.1	25.6	25.6	26.1	0.866025		710000	33.9	28.2	28.2	30.1	3.2909
	710500	41.5	28.3	28.3	32.7	7.62102		710500	40.2	36.8	36.8	37.9333	1.96299		710500	24.7	34.1	34.1	30.9667	5.42709		710500	43.9	38	38	39.9667	3.40637
	711000	39.2	31.3	31.3	33.9333	4.56107		711000	40.7	40.2	38.3	39.7333	1.26623		711000	15.1	30.2	30.2	25.1667	8.71799		711000	23.6	23.6	23.6	23.6	4.35117e-15
	711500	36.8	25.8	25.8	29.4667	6.35085		711500	39.4	33.7	31.8	34.9667	3.95517		711500	18.1	40.8	40.8	33.2333	13.1059		711500	41.5	39.5	39.5	40.1667	1.1547
	712000	35.6	24.4	24.4	28.1333	6.46632		712000	41.3	34.1	27	34.1333	7.15006		712000	23	39.7	39.7	34.1333	9.64175		712000	29.9	24.3	24.3	26.1667	3.23316
	712500	39.8	24.9	24.9	29.8667	8.60252		712500	53.5	45.7	44.1	47.7667	5.02925		712500	17.4	25.5	22.1	21.6667	4.06735		712500	27.2	27.2	27.2	27.2	0
	713000	33	23.3	23.3	26.5333	5.6003		713000	44.8	42.9	39.2	42.3	2.84781		713000	11.3	19.4	19.4	16.7	4.67654		713000	23.8	21.9	21.9	22.5333	1.09697
	713500	36.8	24.6	24.6	28.6667	7.04367		713500	52.4	50.3	46.1	49.6	3.2078		713500	20.1	22.9	22.9	21.9667	1.61658		713500	25.8	23.9	23.9	24.5333	1.09697
	714000	41.2	26.1	26.1	31.1333	8.71799		714000	41.5	41.5	39.7	40.9	1.03923		714000	18.6	33.3	28.1	26.6667	7.45408		714000	27.1	23.5	23.5	24.7	2.07846
	714500	36.6	17.5	17.5	23.8667	11.0274		714500	37.2	37.2	37.2	37.2	0		714500	23.8	31.9	28.1	27.9333	4.05257		714500	44.4	42.6	42.6	43.2	1.03923
	715000	42.9	25.8	25.8	31.5	9.87269		715000	50.3	39.4	35.8	41.8333	7.55006		715000	29.2	22.1	20.3	23.8667	4.70567		715000	35.7	35.7	33.7	35.0333	1.1547
	715500	33.4	22.3	22.3	26	6.40859		715500	44.1	42.2	38.3	41.5333	2.95691		715500	19.8	30.2	30.2	26.7333	6.00444		715500	29.8	26	26	27.2667	2.19393
	716000	43.5	24.8	24.8	31.0333	10.7965		716000	39.8	32.3	30.8	34.3	4.82183		716000	26	24.5	24.5	25	0.866025		716000	38.5	28.4	28.4	31.7667	5.83124
	716500	35.5	25.6	25.6	28.9	5.71577		716500	41.3	39.5	37.7	39.5	1.8		716500	20.6	26.5	26.5	24.5333	3.40637		716500	21.9	18.1	18.1	19.3667	2.19393
[truncated: 572 more rows]

## Sheet: 2-phenethyl acetate-ab9B
	GC-SSR dose response curve
[truncated: 1,708 more rows]

## Sheet: Phenethyl propionate-ab9B
	GC-SSR dose response curve
[truncated: 1,708 more rows]

## Sheet: 2-phenethyl acetate-ab10A
	GC-SSR dose response curve
[truncated: 1,708 more rows]

## Sheet: phenethyl propionate-ab10A
	GC-SSR dose response curve
[truncated: 1,708 more rows]

## Sheet: ab2B
	SSR dose response curve
[truncated: 16 more rows]

[truncated: 4 more sheets: ab9A, ab9B, ab10A, Sheet1]
