# Supplementary material for: Olfactory channels associated with the Drosophila maxillary palp mediate short- and long-range attraction
Source: eLife. 2016 May 23;5:e14925. doi: 10.7554/eLife.14925 (PMC4927298; doi:10.7554/eLife.14925)
Supplement: Figure 5—figure supplement 1—source data 1. — DOI: http://dx.doi.org/10.7554/eLife.14925.024 [file elife-14925-fig5-figsupp1-data1.xlsx]

## Sheet: Fig 5 Supp1A
	Behavioral responses of wild type flies in T- maze assays
Concentration-2	Odorant											Control											O-C											O-C/30
5-hexen-3-one	2	2	0	1	0	0	3	0	2	0		14	17	0	13	17	6	10	20	18	20		-12	-15	0	-12	-17	-6	-7	-20	-16	-20		-0.4	-0.5	0	-0.4	-0.566667	-0.2	-0.233333	-0.666667	-0.533333	-0.666667
4-ethylguaiacol	0	0	3	0	2	1	0	0	5	0		0	7	9	7	0	13	6	3	3	5		0	-7	-6	-7	2	-12	-6	-3	2	-5		0	-0.233333	-0.2	-0.233333	0.0666667	-0.4	-0.2	-0.1	0.0666667	-0.166667
methyleugenol	4	0	0	3	5	2	0	0	2	1		2	2	1	3	3	2	7	0	5	4		2	-2	-1	0	2	0	-7	0	-3	-3		0.0666667	-0.0666667	-0.0333333	0	0.0666667	0	-0.233333	0	-0.1	-0.1
Furaneol methylether	12	24	23	0	21	24	3	20	12	10		6	1	1	4	8	0	12	4	8	1		6	23	22	-4	13	24	-9	16	4	9		0.2	0.766667	0.733333	-0.133333	0.433333	0.8	-0.3	0.533333	0.133333	0.3
phenol	0	0	0	0	0	0	0	0	0	0		0	8	0	15	25	23	20	22	28	20		0	-8	0	-15	-25	-23	-20	-22	-28	-20		0	-0.266667	0	-0.5	-0.833333	-0.766667	-0.666667	-0.733333	-0.933333	-0.666667
Butyl 3-hydroxy butyrate	0	0	7	4	7	11	7	0	25	15		0	23	7	13	0	10	13	10	0	1		0	-23	0	-9	7	1	-6	-10	25	14		0	-0.766667	0	-0.3	0.233333	0.0333333	-0.2	-0.333333	0.833333	0.466667
2-Phenyethyl acetate	14	0	0	5	1	25	0	0	8	19		0	11	10	15	12	5	1	1	6	10		14	-11	-10	-10	-11	20	-1	-1	2	9		0.466667	-0.366667	-0.333333	-0.333333	-0.366667	0.666667	-0.0333333	-0.0333333	0.0666667	0.3
Phenyethyl propionate	9	8	18	6	0	2	9	20	13	15		3	8	10	8	2	8	16	0	0	7		6	0	8	-2	-2	-6	-7	20	13	8		0.2	0	0.266667	-0.0666667	-0.0666667	-0.2	-0.233333	0.666667	0.433333	0.266667

## Sheet: Fig 5 Supp1B
	Behavioral responses of wild type and Orco mutant flies in T- maze assays
	Concentration-2	Odorant											Control											O-C											O-C/30
wt	5-hexen-3-one	2	2	0	1	0	0	3	0	2	0		14	17	0	13	17	6	10	20	18	20		-12	-15	0	-12	-17	-6	-7	-20	-16	-20		-0.4	-0.5	0	-0.4	-0.566667	-0.2	-0.233333	-0.666667	-0.533333	-0.666667
Orco		7	0	0	10	0	8	8	3	0	2		22	27	23	0	12	12	19	24	24	25		-15	-27	-23	10	-12	-4	-11	-21	-24	-23		-0.5	-0.9	-0.766667	0.333333	-0.4	-0.133333	-0.366667	-0.7	-0.8	-0.766667
wt	4-ethylguaiacol	0	0	3	0	2	1	0	0	5	0		0	7	9	7	0	13	6	3	3	5		0	-7	-6	-7	2	-12	-6	-3	2	-5		0	-0.233333	-0.2	-0.233333	0.0666667	-0.4	-0.2	-0.1	0.0666667	-0.166667
Orco		1	4	3	0	1	0	3	1	2	6		0	10	7	3	2	3	4	9	0	8		1	-6	-4	-3	-1	-3	-1	-8	2	-2		0.0333333	-0.2	-0.133333	-0.1	-0.0333333	-0.1	-0.0333333	-0.266667	0.0666667	-0.0666667
wt	Furaneol methylether	12	24	23	0	21	24	3	20	12	10		6	1	1	4	8	0	12	4	8	1		6	23	22	-4	13	24	-9	16	4	9		0.2	0.766667	0.733333	-0.133333	0.433333	0.8	-0.3	0.533333	0.133333	0.3
Orco		10	1	9	6	8	4	3	10	6	2		4	15	9	0	2	3	4	11	2	5		6	-14	0	6	6	1	-1	-1	4	-3		0.2	-0.466667	0	0.2	0.2	0.0333333	-0.0333333	-0.0333333	0.133333	-0.1
wt	phenol	0	0	0	0	0	0	0	0	0	0		0	8	0	15	25	23	20	22	28	20		0	-8	0	-15	-25	-23	-20	-22	-28	-20		0	-0.266667	0	-0.5	-0.833333	-0.766667	-0.666667	-0.733333	-0.933333	-0.666667
Orco		3	2	0	0	0	0	0	0	0	0		15	16	14	20	27	20	10	28	15	12		-12	-14	-14	-20	-27	-20	-10	-28	-15	-12		-0.4	-0.466667	-0.466667	-0.666667	-0.9	-0.666667	-0.333333	-0.933333	-0.5	-0.4
