# Supplementary material for: Olfactory channels associated with the Drosophila maxillary palp mediate short- and long-range attraction
Source: eLife. 2016 May 23;5:e14925. doi: 10.7554/eLife.14925 (PMC4927298; doi:10.7554/eLife.14925)
Supplement: Figure 5—figure supplement 2—source data 1. — DOI: http://dx.doi.org/10.7554/eLife.14925.026 [file elife-14925-fig5-figsupp2-data1.xlsx]

## Sheet: Fig 5 Supp2
	Behavioral responses of males and females towards vinegar in wind tunnel
Wind tunnel	Males	Females
Parameter measured	2	3
number of Landing	3	4
number of realesed fly = 5	3	3
10% vinegar	4	3
	3	3
	3	4
	3	3
	3	2
	4	3
	3	4
