# Supplementary material for: Olfactory channels associated with the Drosophila maxillary palp mediate short- and long-range attraction
Source: eLife. 2016 May 23;5:e14925. doi: 10.7554/eLife.14925 (PMC4927298; doi:10.7554/eLife.14925)
Supplement: Figure 5—source data 1. — DOI: http://dx.doi.org/10.7554/eLife.14925.022 [file elife-14925-fig5-data1.xlsx]

## Sheet: Figure 5A
	Behavioral responses of wild type flies towards palp best activators
Type of assay
T-maze	Concentration10-4	odor											control											O-C											O-C/30
	5-hexen-3-one	23	17	24	0	10	22	4	20	18	20		4	7	0	10	0	2	9	1	0	0		19	10	24	-10	10	20	-5	19	18	20		0.633333	0.333333	0.8	-0.333333	0.333333	0.666667	-0.166667	0.633333	0.6	0.666667
	4-ethylguaiacol	4	12	8	10	15	7	10	20	14	13		7	7	14	16	10	20	15	10	16	6		-3	5	-6	-6	5	-13	-5	10	-2	7		-0.1	0.166667	-0.2	-0.2	0.166667	-0.433333	-0.166667	0.333333	-0.0666667	0.233333
	Methyleugenol ether	7	3	23	10	10	18	10	15	16	10		20	7	7	10	9	12	18	10	10	15		-13	-4	16	0	1	6	-8	5	6	-5		-0.433333	-0.133333	0.533333	0	0.0333333	0.2	-0.266667	0.166667	0.2	-0.166667
	Strawberry furanone	10	12	7	6	18	24	18	23	28	17		0	0	6	4	8	4	4	2	0	5		10	12	1	2	10	20	14	21	28	12		0.333333	0.4	0.0333333	0.0666667	0.333333	0.666667	0.466667	0.7	0.933333	0.4
	Phenol	12	15	13	13	0	10	7	0	11	15		5	0	4	3	20	17	5	10	0	6		7	15	9	10	-20	-7	2	-10	11	9		0.233333	0.5	0.3	0.333333	-0.666667	-0.233333	0.0666667	-0.333333	0.366667	0.3
	buty 3-hydroxy butyrate	8	18	10	0	8	14	10	20	12	25		14	10	15	20	10	2	12	5	15	2		-6	8	-5	-20	-2	12	-2	15	-3	23		-0.2	0.266667	-0.166667	-0.666667	-0.0666667	0.4	-0.0666667	0.5	-0.1	0.766667
	Phenylethyl acetate	22	0	0	5	8	0	23	12	4	0		0	5	20	0	0	0	1	2	5	0		22	-5	-20	5	8	0	22	10	-1	0		0.733333	-0.166667	-0.666667	0.166667	0.266667	0	0.733333	0.333333	-0.0333333	0
	Phenylethyl propionate	0	10	1	10	12	11	0	2	7	2		2	6	10	5	0	0	0	4	2	11		-2	4	-9	5	12	11	0	-2	5	-9		-0.0666667	0.133333	-0.3	0.166667	0.4	0.366667	0	-0.0666667	0.166667	-0.3
Trap	Concentration10-4	odor											control											O-C											O-C/30
	5-hexen-3-one	8	7	11	10	12	5	9	18	20	19		10	6	11	12	14	4	10	2	10	4		-2	1	0	-2	-2	1	-1	16	10	15		-0.0666667	0.0333333	0	-0.0666667	-0.0666667	0.0333333	-0.0333333	0.533333	0.333333	0.5
	4-ethylguaiacol	12	22	8	11	19	15	12	18	16	14		18	5	9	13	2	8	2	9	4	8		-6	17	-1	-2	17	7	10	9	12	6		-0.2	0.566667	-0.0333333	-0.0666667	0.566667	0.233333	0.333333	0.3	0.4	0.2
	Methyleugenol	16	18	15	20	13	21	10	7	15	19		7	10	2	7	7	1	17	13	4	4		9	8	13	13	6	20	-7	-6	11	15		0.3	0.266667	0.433333	0.433333	0.2	0.666667	-0.233333	-0.2	0.366667	0.5
	Strawberry furanone	18	9	18	21	5	23	7	4	8	22		6	21	6	9	3	3	19	20	14	3		12	-12	12	12	2	20	-12	-16	-6	19		0.4	-0.4	0.4	0.4	0.0666667	0.666667	-0.4	-0.533333	-0.2	0.633333
	phenol-4	8	12	4	8	11	7	4	14	4	11		8	5	14	0	5	3	7	4	6	4		0	7	-10	8	6	4	-3	10	-2	7		0	0.233333	-0.333333	0.266667	0.2	0.133333	-0.1	0.333333	-0.0666667	0.233333
	Butyl 3-ydroxy butyrate	12	15	9	14	14	5	8	10	12	12		7	8	11	4	10	16	20	9	11	11		5	7	-2	10	4	-11	-12	1	1	1		0.166667	0.233333	-0.0666667	0.333333	0.133333	-0.366667	-0.4	0.0333333	0.0333333	0.0333333
	Phenyethyl acetate	16	20	10	15	10	10	14	13	20	5		4	2	11	2	7	7	6	5	1	3		12	18	-1	13	3	3	8	8	19	2		0.4	0.6	-0.0333333	0.433333	0.1	0.1	0.266667	0.266667	0.633333	0.0666667
	Phenyethyl propionate	11	12	21	5	13	14	16	17	10	15		9	2	5	6	6	7	9	9	9	8		2	10	16	-1	7	7	7	8	1	7		0.0666667	0.333333	0.533333	-0.0333333	0.233333	0.233333	0.233333	0.266667	0.0333333	0.233333
Wind tunnel	Concentration10-2
Parameter measured	5-hexen-3-one	0	0	0	0	0	0	0	0	0	1
number of Landing	4-ethylguaiacol	0	0	0	0	1	0	0	0	0	1
number of realesed fly = 5	Methyleugenol	0	0	0	1	0	0	1	0	0	0
	Strawberry furanone	2	3	2	1	3	2	1	2	1	3
	phenol-4	0	0	0	0	0	0	0	0	0	0
	Butyl 3-ydroxy butyrate	0	0	1	0	1	0	0	0	0	0
	Phenyethyl acetate	1	0	1	0	1	0	0	0	0	0
	Phenyethyl propionate	1	0	0	0	0	0	0	1	1	0
	acetone	1	1	0	0	0	0	0	0	0	0

## Sheet: Figure 5B
	Behavioral responses of wild type and Orco mutant flies
Type of assay	Fly type
T-maze		Concentration10-4	odor											control											O-C											O-C/30
	WT	5-hexen-3-one	23	17	24	0	10	22	4	20	18	20		4	7	0	10	0	2	9	1	0	0		19	10	24	-10	10	20	-5	19	18	20		0.633333	0.333333	0.8	-0.333333	0.333333	0.666667	-0.166667	0.633333	0.6	0.666667
	orco	5-hexen-3-one	0	0	0	0	0	0	1	1	1	0		2	0	0	0	0	0	0	0	0	1		-2	0	0	0	0	0	1	1	1	-1		-0.1	0	0	0	0	0	0.5	0.05	0.05	-0.05
T-maze		Concentration10-4	odor											control											O-C											O-C/30
	Wt	Strawberry furanone	10	12	7	6	18	24	18	23	28	17		0	0	6	4	8	4	4	2	0	5		10	12	1	2	10	20	14	21	28	12		0.333333	0.4	0.0333333	0.0666667	0.333333	0.666667	0.466667	0.7	0.933333	0.4
	orco-/-	Strawberry furanone	2	7	1	4	6	1	2	0	0	10		11	7	0	2	0	5	0	0	2	6		-9	0	1	2	6	-4	2	0	-2	4		-0.45	0	0.05	0.1	0.3	-0.2	0.1	0	-0.1	0.2
Trap	WT	4-ethylguaiacol	12	22	8	11	19	15	12	18	16	14		18	5	9	13	2	8	2	9	4	8		-6	17	-1	-2	17	7	10	9	12	6		-0.2	0.566667	-0.0333333	-0.0666667	0.566667	0.233333	0.333333	0.3	0.4	0.2
	orco	4-ethylguaiacol	10	10	8	13	6	9	9	5	17	8		13	7	12	12	11	14	5	15	7	18		-3	3	-4	1	-5	-5	4	-10	10	-10		-0.1	0.1	-0.133333	0.0333333	-0.166667	-0.166667	0.133333	-0.333333	0.333333	-0.333333
Trap	WT	Methyleugenol	16	18	15	20	13	21	10	7	15	19		7	10	2	7	7	1	17	13	4	4		9	8	13	13	6	20	-7	-6	11	15		0.3	0.266667	0.433333	0.433333	0.2	0.666667	-0.233333	-0.2	0.366667	0.5
	orco	Methyleugenol	10	5	9	9	11	12	9	10	15	5		10	9	12	12	12	10	11	10	8	13		0	-4	-3	-3	-1	2	-2	0	7	-8		0	-0.133333	-0.1	-0.1	-0.0333333	0.0666667	-0.0666667	0	0.233333	-0.266667
Trap	WT	Phenyethyl acetate	16	20	10	15	10	10	14	13	20	5		4	2	11	2	7	7	6	5	1	3		12	18	-1	13	3	3	8	8	19	2		0.4	0.6	-0.0333333	0.433333	0.1	0.1	0.266667	0.266667	0.633333	0.0666667
	orco	Phenyethyl acetate	12	13	12	13	7	15	6	5	12	10		10	9	13	10	5	10	2	2	13	11		2	4	-1	3	2	5	4	3	-1	-1		0.0666667	0.133333	-0.0333333	0.1	0.0666667	0.166667	0.133333	0.1	-0.0333333	-0.0333333
Trap	WT	Phenyethyl propionate	11	12	21	5	13	14	16	17	10	15		9	2	5	6	6	7	9	9	9	8		2	10	16	-1	7	7	7	8	1	7		0.0666667	0.333333	0.533333	-0.0333333	0.233333	0.233333	0.233333	0.266667	0.0333333	0.233333
	orco	Phenyethyl propionate	9	0	10	8	17	8	3	12	5	5		2	3	8	10	8	12	1	12	5	1		7	-3	2	-2	9	-4	2	0	0	4		0.233333	-0.1	0.0666667	-0.0666667	0.3	-0.133333	0.0666667	0	0	0.133333
Wind tunnel	WT	Strawberry furanone	2	3	2	1	3	2	1	2	1	3
Parameter measured	orco		0	0	0	0	0	0	0	0	0	0
number of Landing
number of realesed fly = 5

## Sheet: Figure 5C
	Behavioral responses of wild type, antennal-less and palp-less flies
Type of assay	Type of amputation
T-maze		Concentration10-4	odor											control
	wt	5-hexen-3-one	23	17	24	0	10	22	4	20	18	20		4	7	0	10	0	2	9	1	0	0		19	10	24	-10	10	20	-5	19	18	20		0.633333	0.333333	0.8	-0.333333	0.333333	0.666667	-0.166667	0.633333	0.6	0.666667
	no palp	5-hexen-3-one	0	6	7	5	0	4	2	0	7	8		6	1	5	0	15	0	0	4	4	2		-6	5	2	5	-15	4	2	-4	3	6		-0.4	0.333333	0.133333	0.333333	-1	0.266667	0.133333	-0.266667	0.2	0.4
	no atennae	5-hexen-3-one	10	9	11	8	7	9	8	13	0	14		1	0	1	2	0	0	4	1	9	0		9	9	10	6	7	9	4	12	-9	14		0.6	0.6	0.666667	0.4	0.466667	0.6	0.266667	0.8	-0.6	0.933333
T-maze		Concentration10-4	odor											control											O-C											O-C/30
	wt	Strawberry furanone	10	12	7	6	18	24	18	23	28	17		0	0	6	4	8	4	4	2	0	5		10	12	1	2	10	20	14	21	28	12		0.333333	0.4	0.0333333	0.0666667	0.333333	0.666667	0.466667	0.7	0.933333	0.4
	No palp	Strawberry furanone	0	1	0	6	2	2	4	6	8	2		14	1	1	8	4	1	4	7	7	10		-14	0	-1	-2	-2	1	0	-1	1	-8		-0.933333	0	-0.0666667	-0.133333	-0.133333	0.0666667	0	-0.0666667	0.0666667	-0.533333
	no atennae	Strawberry furanone	9	9	6	9	14	4	9	9	5	3		0	4	2	5	1	2	0	2	6	6		9	5	4	4	13	2	9	7	-1	-3		0.6	0.333333	0.266667	0.266667	0.866667	0.133333	0.6	0.466667	-0.0666667	-0.2
Trap	wt	4-ethylguaiacol-4*	12	22	8	11	19	15	12	18	16	14		18	5	9	13	2	8	2	9	4	8		-6	17	-1	-2	17	7	10	9	12	6		-0.2	0.566667	-0.0333333	-0.0666667	0.566667	0.233333	0.333333	0.3	0.4	0.2
	no palp		10	8	11	10	5	7	10	8	10	9		11	10	12	8	12	5	14	6	10	10		-1	-2	-1	2	-7	2	-4	2	0	-1		-0.0333333	-0.0666667	-0.0333333	0.0666667	-0.233333	0.0666667	-0.133333	0.0666667	0	-0.0333333
	no antenna		15	10	14	12	9	13	11	10	15	13		10	6	6	6	5	5	8	3	6	4		5	4	8	6	4	8	3	7	9	9		0.166667	0.133333	0.266667	0.2	0.133333	0.266667	0.1	0.233333	0.3	0.3
Trap	wt	Methyleugenol-4*	16	18	15	20	13	21	10	7	15	19		7	10	2	7	7	1	17	13	4	4		9	8	13	13	6	20	-7	-6	11	15		0.3	0.266667	0.433333	0.433333	0.2	0.666667	-0.233333	-0.2	0.366667	0.5
	no palp		8	13	7	5	8	2	4	10	8	11		10	4	11	6	5	4	9	4	10	8		-2	9	-4	-1	3	-2	-5	6	-2	3		-0.0666667	0.3	-0.133333	-0.0333333	0.1	-0.0666667	-0.166667	0.2	-0.0666667	0.1
	no antenna		12	15	13	14	12	14	10	11	6	20		6	8	8	8	10	9	5	5	3	8		6	7	5	6	2	5	5	6	3	12		0.2	0.233333	0.166667	0.2	0.0666667	0.166667	0.166667	0.2	0.1	0.4
Trap		Concentration10-4	odor											control												O-C										O-C/30
	wt	Phenyethyl acetate-4	16	20	10	15	10	10	14	13	20	5		4	2	11	2	7	7	6	5	1	3		12	18	-1	13	3	3	8	8	19	2		0.4	0.6	-0.0333333	0.433333	0.1	0.1	0.266667	0.266667	0.633333	0.0666667
	no palp		18	9	10	15	19	15	11	17	10	20		6	2	2	1	9	6	1	4	14	7		12	7	8	14	10	9	10	13	-4	13		0.4	0.233333	0.266667	0.466667	0.333333	0.3	0.333333	0.433333	-0.133333	0.433333
	no antenna		4	13	9	5	8	11	12	11	5	8		5	10	9	11	13	10	9	13	7	13		-1	3	0	-6	-5	1	3	-2	-2	-5		-0.0333333	0.1	0	-0.2	-0.166667	0.0333333	0.1	-0.0666667	-0.0666667	-0.166667
Trap	wt	Phenyethyl propionate-4	11	12	21	5	13	14	16	17	10	15		9	2	5	6	6	7	9	9	9	8		2	10	16	-1	7	7	7	8	1	7		0.0666667	0.333333	0.533333	-0.0333333	0.233333	0.233333	0.233333	0.266667	0.0333333	0.233333
	no palp		14	19	12	3	17	9	15	15	23	9		6	2	4	12	7	11	6	7	1	10		8	17	8	-9	10	-2	9	8	22	-1		0.266667	0.566667	0.266667	-0.3	0.333333	-0.0666667	0.3	0.266667	0.733333	-0.0333333
	no antenna		4	7	6	4	8	9	5	3	4	1		5	6	4	8	9	5	7	4	6	2		-1	1	2	-4	-1	4	-2	-1	-2	-1		-0.0333333	0.0333333	0.0666667	-0.133333	-0.0333333	0.133333	-0.0666667	-0.0333333	-0.0666667	-0.0333333
Wind tunnel	WT	Strawberry furanone	2	3	2	1	3	2	1	2	1	3
Parameter measured	no palp		1	0	0	0	0	1	0	0	0	1
number of Landing
number of realesed fly = 5

## Sheet: Figure 5D
	Behavioral responses of specific OSNs manupulated flies
Type of assay		Concentration10-4
T-maze		5-hexen-3-one	odor											control											O-C											O-C/20
	Shi/+@23		11	10	11	15	9	9	10	13	17	10		2	5	1	0	12	4	6	2	3	7		9	5	10	15	-3	5	4	11	14	3		0.45	0.25	0.5	0.75	-0.15	0.25	0.2	0.55	0.7	0.15
	Or42a/+@23		15	16	12	9	11	8	8	10	13	14		5	0	6	3	2	1	7	0	0	0		10	16	6	6	9	7	1	10	13	14		0.5	0.8	0.3	0.3	0.45	0.35	0.05	0.5	0.65	0.7
	Or42a/shi@23		5	0	10	0	17	15	6	8	6	10		5	2	0	2	0	2	0	0	1	0		0	-2	10	-2	17	13	6	8	5	10		0	-0.1	0.5	-0.1	0.85	0.65	0.3	0.4	0.25	0.5
	Shi/+@30		10	0	8	13	19	12	10	13	9	10		0	0	1	6	1	8	5	5	3	0		10	0	7	7	18	4	5	8	6	10		0.5	0	0.35	0.35	0.9	0.2	0.25	0.4	0.3	0.5
	Or42a/+@30		10	14	8	12	12	5	10	6	12	9		0	2	0	2	4	0	5	5	4	3		10	12	8	10	8	5	5	1	8	6		0.5	0.6	0.4	0.5	0.4	0.25	0.25	0.05	0.4	0.3
	Or42a/shi@30		7	0	0	2	8	6	2	0	0	5		5	10	0	6	7	2	4	0	4	2		2	-10	0	-4	1	4	-2	0	-4	3		0.1	-0.5	0	-0.2	0.05	0.2	-0.1	0	-0.2	0.15
T-maze		Strawberry furanone
	shi/+@23		8	13	11	9	8	12	10	7	10	9		8	2	3	0	0	4	5	0	2	1		0	11	8	9	8	8	5	7	8	8		0	0.55	0.4	0.45	0.4	0.4	0.25	0.35	0.4	0.4
	Or33c+@23		10	8	14	9	17	10	7	15	11	10		2	10	0	3	0	4	8	2	0	3		8	-2	14	6	17	6	-1	13	11	7		0.4	-0.1	0.7	0.3	0.85	0.3	-0.05	0.65	0.55	0.35
	Or33c/shi@23		17	14	10	0	19	12	2	3	18	19		0	8	6	4	0	0	1	6	2	0		17	6	4	-4	19	12	1	-3	16	19		0.85	0.3	0.2	-0.2	0.95	0.6	0.05	-0.15	0.8	0.95
	Shi/+@30		12	14	16	14	8	12	13	10	12	11		0	2	2	0	2	7	5	6	8	9		12	12	14	14	6	5	8	4	4	2		0.6	0.6	0.7	0.7	0.3	0.25	0.4	0.2	0.2	0.1
	Or33c/+@30		14	5	13	15	10	16	11	10	12	8		0	0	0	2	10	0	6	4	6	0		14	5	13	13	0	16	5	6	6	8		0.7	0.25	0.65	0.65	0	0.8	0.25	0.3	0.3	0.4
	Or33c/shi@30		11	3	2	0	5	1	10	5	0	4		9	7	0	0	2	4	10	8	0	2		2	-4	2	0	3	-3	0	-3	0	2		0.1	-0.2	0.1	0	0.15	-0.15	0	-0.15	0	0.1
		Strawberry furanone
	shi/+@23		8	13	11	9	8	12	10	7	10	9		8	2	3	0	0	4	5	0	2	1		0	11	8	9	8	8	5	7	8	8		0	0.55	0.4	0.45	0.4	0.4	0.25	0.35	0.4	0.4
	Or85e+@23		14	9	7	13	10	12	14	10	6	8		0	2	5	0	1	1	0	4	5	2		14	7	2	13	9	11	14	6	1	6		0.7	0.35	0.1	0.65	0.45	0.55	0.7	0.3	0.05	0.3
	Or85e/shi@23		10	12	10	12	12	14	10	13	8	10		7	5	7	0	5	0	7	6	0	0		3	7	3	12	7	14	3	7	8	10		0.15	0.35	0.15	0.6	0.35	0.7	0.15	0.35	0.4	0.5
	Shi/+@30		12	14	16	14	8	12	13	10	12	11		0	2	2	0	2	7	5	6	8	9		12	12	14	14	6	5	8	4	4	2		0.6	0.6	0.7	0.7	0.3	0.25	0.4	0.2	0.2	0.1
	Or85e/+@30		10	12	7	17	12	11	12	10	12	8		3	3	1	0	8	9	0	1	5	2		7	9	6	17	4	2	12	9	7	6		0.35	0.45	0.3	0.85	0.2	0.1	0.6	0.45	0.35	0.3
	Or85e/shi@30		10	7	4	0	2	1	4	0	0	2		10	7	0	5	1	0	7	0	0	2		0	0	4	-5	1	1	-3	0	0	0		0	0	0.2	-0.25	0.05	0.05	-0.15	0	0	0
		4-ethylguaiacol
Trap	UAS-hid		16	9	7	16	21	15	5	18	10	12		7	8	13	6	3	6	3	5	0	3		9	1	-6	10	18	9	2	13	10	9		0.3	0.0333333	-0.2	0.333333	0.6	0.3	0.0666667	0.433333	0.333333	0.3
	Or71a-Gal4		14	16	18	4	5	10	2	14	5	13		4	2	1	3	6	6	1	1	2	5		10	14	17	1	-1	4	1	13	3	8		0.333333	0.466667	0.566667	0.0333333	-0.0333333	0.133333	0.0333333	0.433333	0.1	0.266667
	hid-or71		0	0	3	0	2	1	0	0	5	0		0	7	9	7	0	13	6	3	3	5		0	-7	-6	-7	2	-12	-6	-3	2	-5		0	-0.233333	-0.2	-0.233333	0.0666667	-0.4	-0.2	-0.1	0.0666667	-0.166667
		Methyleugenol
	UAS-hid/+		15	10	9	3	16	11	5	8	5	10		4	4	2	8	5	2	5	1	4	6		11	6	7	-5	11	9	0	7	1	4		0.366667	0.2	0.233333	-0.166667	0.366667	0.3	0	0.233333	0.0333333	0.133333
	Or71a-Gal4/+		14	16	6	14	12	11	8	18	5	9		7	4	9	10	11	10	6	7	5	5		7	12	-3	4	1	1	2	11	0	4		0.233333	0.4	-0.1	0.133333	0.0333333	0.0333333	0.0666667	0.366667	0	0.133333
	hid-or71		4	0	0	3	5	2	0	0	2	1		2	2	1	3	3	2	7	0	5	4		2	-2	-1	0	2	0	-7	0	-3	-3		0.0666667	-0.0666667	-0.0333333	0	0.0666667	0	-0.233333	0	-0.1	-0.1
		Phenyethyl acetate
	UAS-hid/+		15	8	10	12	12	13	6	8	18	13		1	1	3	3	6	0	8	9	1	1		14	7	7	9	6	13	-2	-1	17	12		0.466667	0.233333	0.233333	0.3	0.2	0.433333	-0.0666667	-0.0333333	0.566667	0.4
	Or85d-Gal4/+		9	13	7	10	7	10	13	1	9	11		1	1	1	2	1	2	1	0	6	0		8	12	6	8	6	8	12	1	3	11		0.266667	0.4	0.2	0.266667	0.2	0.266667	0.4	0.0333333	0.1	0.366667
	hid-or85d		17	12	11	18	15	13	8	13	13	15		0	6	6	0	3	6	6	8	10	9		17	6	5	18	12	7	2	5	3	6		0.566667	0.2	0.166667	0.6	0.4	0.233333	0.0666667	0.166667	0.1	0.2
		Phenyethyl propionate
	UAS-hid/+		16	10	10	13	8	5	12	10	18	15		1	7	5	5	2	8	6	5	3	4		15	3	5	8	6	-3	6	5	15	11		0.5	0.1	0.166667	0.266667	0.2	-0.1	0.2	0.166667	0.5	0.366667		0.5	0.3	0.366667
	Or85d-Gal4/+		10	12	7	2	0	15	12	8	12	7		1	1	2	1	0	3	1	1	3	2		9	11	5	1	0	12	11	7	9	5		0.3	0.366667	0.166667	0.0333333	0	0.4	0.366667	0.233333	0.3	0.166667		0.1	0.366667	-0.166667
	hid-or85d		13	6	14	14	8	16	16	10	8	19		2	11	9	2	4	2	2	10	8	1		11	-5	5	12	4	14	14	0	0	18		0.366667	-0.166667	0.166667	0.4	0.133333	0.466667	0.466667	0	0	0.6		0.166667	0.166667	0.166667
																																															0.266667	0.0333333	0.4
Wind tunnel		Concentration10-2																																													0.2	0	0.133333
Parameter measured		Strawberry furanone																																													-0.1	0.4	0.466667
number of Landing																																															0.2	0.366667	0.466667
number of realesed fly = 5	UAS-hid/+		1	2	1	1	1	1	1	1	1	1																																			0.166667	0.233333	0
	or33c-Gal4/+		1	2	2	1	0	1	1	2	1	1
	hid-33c		0	0	0	1	0	1	0	0	0	0																																			0.5	0.3	0
																																															0.366667	0.166667	0.6
		Strawberry furanone
	UAS-hid/+		1	2	1	1	1	1	1	1	1	1
	or85e-Gal4/+		2	2	0	1	2	1	0	0	2	2
	hid-or85e		1	0	0	0	0	0	0	0	0	1
