# Supplementary material for: Olfactory channels associated with the Drosophila maxillary palp mediate short- and long-range attraction
Source: eLife. 2016 May 23;5:e14925. doi: 10.7554/eLife.14925 (PMC4927298; doi:10.7554/eLife.14925)
Supplement: Figure 6—source data 1. — Raw data of D. melanogaster results from the same figure can be found in Figure 3—source data 1. DOI: http://dx.doi.org/10.7554/eLife.14925.028 [file elife-14925-fig6-data1.xlsx]

## Sheet: 5-hexen-3-one-pb1A
	GC-SSR responses to 5-hexen-3-one
T[ms]	F[Hz]	F[Hz]	F[Hz]	Average	SD
150000	17.5	8.8	17.5	14.6	5.02295
150500	15.4	11.4	15.4	14.0667	2.3094
151000	15.4	11.6	17	14.6667	2.77369
151500	17	7.2	17	13.7333	5.65803
152000	12.4	7.1	12.4	10.6333	3.05996
152500	16.9	14.3	16.9	16.0333	1.50111
153000	14.2	9.7	14.2	12.7	2.59808
153500	16.5	10.6	16.5	14.5333	3.40637
154000	15	13.5	16.7	15.0667	1.60104
154500	16.9	10	16.9	14.6	3.98372
155000	16.8	8.5	16.8	14.0333	4.79201
155500	15.8	11.7	15.8	14.4333	2.36714
156000	10	11.7	10	10.5667	0.981495
156500	18.4	5	18.4	13.9333	7.73649
157000	16.9	8.7	16.9	14.1667	4.73427
157500	16.7	14.7	18.6	16.6667	1.95021
158000	16.1	6.9	16.1	13.0333	5.31162
158500	13.7	6.4	13.7	11.2667	4.21466
159000	13.4	7.2	13.4	11.3333	3.57957
159500	14.8	12.1	14.8	13.9	1.55885
160000	9.1	9.8	9.1	9.33333	0.404145
160500	14.2	6.7	14.2	11.7	4.33013
161000	15.1	10.4	17	14.1667	3.39755
161500	8.5	13.2	8.5	10.0667	2.71355
162000	8.2	12.3	8.2	9.56667	2.36714
162500	14.7	9.7	14.7	13.0333	2.88675
163000	16.9	5	16.9	12.9333	6.87047
163500	11.5	8.6	11.5	10.5333	1.67432
164000	13.6	7	15.5	12.0333	4.46132
164500	13.9	5.4	13.9	11.0667	4.90748
165000	11.3	8	11.3	10.2	1.90526
165500	11.8	7.9	11.8	10.5	2.25167
166000	9.3	6.6	9.3	8.4	1.55885
166500	13.1	8.1	13.1	11.4333	2.88675
167000	11.5	6.5	11.5	9.83333	2.88675
167500	11.3	9.1	11.3	10.5667	1.27017
168000	16.6	7.1	16.6	13.4333	5.48483
168500	13	10.3	13	12.1	1.55885
169000	11.6	7.6	13.1	10.7667	2.84312
169500	7.6	6	7.6	7.06667	0.92376
170000	18.1	13	18.1	16.4	2.94449
170500	18.3	10.7	18.3	15.7667	4.38786
171000	10.9	5.2	10.9	9	3.2909
171500	15.8	9.2	15.8	13.6	3.81051
172000	9.3	7.4	9.3	8.66667	1.09697
172500	8.4	5.5	8.4	7.43333	1.67432
173000	6.5	3.7	6.5	5.56667	1.61658
173500	7	1.4	7	5.13333	3.23316
174000	5.7	5.8	5.7	5.73333	0.057735
174500	11.9	11.3	11.9	11.7	0.34641
175000	11.1	6.8	11.1	9.66667	2.48261
175500	9.9	10.1	9.9	9.96667	0.11547
176000	22.7	8.5	22.7	17.9667	8.19837
176500	6.7	5.8	6.7	6.4	0.519615
177000	11.2	9.1	11.2	10.5	1.21244
177500	11.3	6.6	11.3	9.73333	2.71355
178000	9.9	5.9	9.9	8.56667	2.3094
178500	17.1	13.3	17.1	15.8333	2.19393
179000	12.6	4.4	12.6	9.86667	4.73427
179500	6.3	3.5	6.3	5.36667	1.61658
180000	12.4	7.2	12.4	10.6667	3.00222
180500	10.7	4.3	12.2	9.06667	4.19563
181000	10.8	9.5	10.8	10.3667	0.750555
181500	8.8	8	10.1	8.96667	1.05987
182000	3.3	9.3	4.9	5.83333	3.10698
182500	11.9	10.2	11.9	11.3333	0.981495
183000	8	9.5	8	8.5	0.866025
183500	6.4	7.4	6.4	6.73333	0.57735
184000	9.7	7	9.7	8.8	1.55885
184500	11	9	11	10.3333	1.1547
185000	17.4	12.3	17.4	15.7	2.94449
185500	14.6	12	14.6	13.7333	1.50111
186000	12.3	6.7	12.3	10.4333	3.23316
186500	16.3	7.5	16.3	13.3667	5.08068
187000	15.4	6.3	15.4	12.3667	5.25389
187500	8.6	9.7	8.6	8.96667	0.635085
188000	20.2	9.6	20.2	16.6667	6.11991
188500	16.4	11.3	16.4	14.7	2.94449
189000	16.9	12.5	16.9	15.4333	2.54034
189500	10.2	12.6	10.2	11	1.38564
190000	17.7	12.7	17.7	16.0333	2.88675
190500	16.6	5.8	18.4	13.6	6.81469
191000	20.2	11	20.2	17.1333	5.31162
191500	17.6	10	17.6	15.0667	4.38786
192000	18.4	4.9	18.4	13.9	7.79423
192500	18.9	10.6	18.9	16.1333	4.79201
193000	18.7	7.9	18.7	15.1	6.23538
193500	12.5	3.2	12.5	9.4	5.36936
194000	16.4	6.7	16.4	13.1667	5.6003
194500	24.2	8	24.2	18.8	9.35307
195000	13.2	11.6	13.2	12.6667	0.92376
195500	13	11	13	12.3333	1.1547
196000	25.3	13.4	25.3	21.3333	6.87047
196500	17.2	7.2	17.2	13.8667	5.7735
197000	14.3	9.9	14.3	12.8333	2.54034
197500	19.2	12.1	19.2	16.8333	4.09919
198000	9.4	10.9	9.4	9.9	0.866025
198500	15	6.5	15	12.1667	4.90748
199000	27.3	9.9	27.3	21.5	10.0459
199500	12.8	10.6	12.8	12.0667	1.27017
200000	24.8	10.7	24.8	20.1	8.14064
200500	22.1	25.3	22.1	23.1667	1.84752
201000	51.8	63.7	51.8	55.7667	6.87047
201500	71.4	75.2	71.4	72.6667	2.19393
202000	75.8	67.6	75.8	73.0667	4.73427
202500	68.5	55.9	68.5	64.3	7.27461
203000	58.8	48.5	58.8	55.3667	5.94671
203500	49.3	61.3	49.3	53.3	6.9282
204000	54.1	76.9	58.1	63.0333	12.1743
204500	78.7	84.7	80.6	81.3333	3.06649
205000	87.7	64.9	87.7	80.1	13.1636
205500	78.1	71.9	80	76.6667	4.23596
206000	74.1	66.7	74.1	71.6333	4.27239
206500	72.5	69.9	72.5	71.6333	1.50111
207000	65.8	63.3	70.4	66.5	3.60139
207500	61	59.2	66.2	62.1333	3.63501
208000	56.5	58.5	58.1	57.7	1.0583
208500	51.5	47.6	57.1	52.0667	4.77528
209000	59.2	52.1	59.2	56.8333	4.09919
209500	54.9	53.5	54.9	54.4333	0.80829
210000	46.9	44.8	46.9	46.2	1.21244
210500	46.9	45.2	48.8	46.9667	1.80093
211000	42.9	39.7	42.9	41.8333	1.84752
211500	50	37.5	52.1	46.5333	7.89325
212000	47.2	42.6	49.3	46.3667	3.42685
212500	45.5	31.3	47.4	41.4	8.7983
213000	47.8	29.2	47.8	41.6	10.7387
213500	41.8	30.6	41.8	38.0667	6.46632
214000	43.5	30.2	43.5	39.0667	7.67876
214500	39.7	23.4	39.7	34.2667	9.41081
215000	42.6	29	42.6	38.0667	7.85196
215500	44.6	23	44.6	37.4	12.4708
216000	38.6	22.3	40.5	33.8	10.0045
216500	36.4	22.1	36.4	31.6333	8.25611
217000	38.6	17.1	40.7	32.1333	13.0615
217500	31.9	19.8	31.9	27.8667	6.98594
218000	29.9	14.3	29.9	24.7	9.00666
218500	36.8	15.6	36.8	29.7333	12.2398
219000	34	15.7	34	27.9	10.5655
219500	36.8	12.2	36.8	28.6	14.2028
220000	34.7	20.5	34.7	29.9667	8.19837
220500	32.7	13.5	32.7	26.3	11.0851
221000	31.5	15.7	33.6	26.9333	9.78485
221500	26.6	17.2	26.6	23.4667	5.42709
222000	26.7	14.8	28.4	23.3	7.41013
222500	28.7	13.7	28.7	23.7	8.66025
223000	26.5	10.5	26.5	21.1667	9.2376
223500	30	8.6	30	22.8667	12.3553
224000	27.7	11.6	27.7	22.3333	9.29534
224500	28.6	9.7	30.3	22.8667	11.4343
225000	22.3	6.5	22.3	17.0333	9.12213
225500	30.5	10	30.5	23.6667	11.8357
226000	27.6	9.8	27.6	21.6667	10.2768
226500	26.3	8.5	26.3	20.3667	10.2768
227000	21.4	5.7	21.4	16.1667	9.0644
227500	20.8	15.8	20.8	19.1333	2.88675
228000	20.6	10.7	20.6	17.3	5.71577
228500	21.8	10.5	21.8	18.0333	6.52406
229000	25.9	10.5	25.9	20.7667	8.89119
229500	26.4	6.4	26.4	19.7333	11.547
230000	16.7	12.5	16.7	15.3	2.42487
230500	17.5	14.2	17.5	16.4	1.90526
231000	20	12.5	20	17.5	4.33013
231500	18.5	9	18.5	15.3333	5.48483
232000	22	7	22	17	8.66025
232500	14	5.3	14	11.1	5.02295
233000	18.3	7.2	19.9	15.1333	6.91689
233500	29.6	8.7	29.6	22.6333	12.0666
234000	13.3	5.8	13.3	10.8	4.33013
234500	19.6	7.5	19.6	15.5667	6.98594
235000	19.8	7.3	19.8	15.6333	7.21688
235500	15.2	3.3	15.2	11.2333	6.87047
236000	21.5	6.3	21.5	16.4333	8.77572
236500	15.3	4.8	15.3	11.8	6.06218
237000	19.9	3.4	19.9	14.4	9.52628
237500	15.5	6.4	15.5	12.4667	5.25389
238000	15.4	5.4	15.4	12.0667	5.7735
238500	14.4	7.7	14.4	12.1667	3.86825
239000	9	3.8	9	7.26667	3.00222
239500	12.4	3.7	12.4	9.5	5.02295
240000	9.9	3.1	9.9	7.63333	3.92598
240500	5.5	3.8	5.5	4.93333	0.981495
241000	5.1	10.4	5.1	6.86667	3.05996
241500	10.1	7.4	10.1	9.2	1.55885
242000	10.9	7.7	10.9	9.83333	1.84752
242500	9.5	3.5	9.5	7.5	3.4641
243000	10.2	8.3	10.2	9.56667	1.09697
243500	15.5	8.7	15.5	13.2333	3.92598
244000	13.6	2.9	13.6	10.0333	6.17765
244500	14.5	5.1	14.5	11.3667	5.42709
245000	10.4	4.5	10.4	8.43333	3.40637
245500	16.1	7	16.1	13.0667	5.25389
246000	12.6	13.9	12.6	13.0333	0.750555
246500	16.9	8.4	16.9	14.0667	4.90748
247000	7.6	2.3	7.6	5.83333	3.05996
247500	11.9	2.8	11.9	8.86667	5.25389
248000	14.2	7.3	14.2	11.9	3.98372
248500	12.7	4.8	12.7	10.0667	4.56107
249000	14.4	3.9	14.4	10.9	6.06218
249500	22.1	10	22.1	18.0667	6.98594
250000	13.4	5.2	13.4	10.6667	4.73427
250500	9.4	4.7	9.4	7.83333	2.71355
251000	15	9.2	15	13.0667	3.34863
251500	13.6	8	13.6	11.7333	3.23316
252000	9.8	11.5	9.8	10.3667	0.981495
252500	19.7	6.3	19.7	15.2333	7.73649
253000	13.2	9	13.2	11.8	2.42487
253500	13.6	10.3	13.6	12.5	1.90526
254000	17.5	5.4	17.5	13.4667	6.98594
254500	12.7	7.1	12.7	10.8333	3.23316
255000	12.8	9.3	12.8	11.6333	2.02073
255500	7.5	10.8	7.5	8.6	1.90526
256000	10.2	9.7	10.2	10.0333	0.288675
256500	14.1	5.7	14.1	11.3	4.84974
257000	13.4	11.2	13.4	12.6667	1.27017
257500	13.2	10	13.2	12.1333	1.84752
258000	8	4.5	8	6.83333	2.02073
258500	12.1	6	12.1	10.0667	3.52184
259000	15.6	8.8	15.6	13.3333	3.92598
259500	21.1	11	21.1	17.7333	5.83124
260000	12.4	13.7	12.4	12.8333	0.750555
260500	14.7	8.6	14.7	12.6667	3.52184
261000	17	5	17	13	6.9282
261500	13.8	12.2	13.8	13.2667	0.92376
262000	13.6	11.1	13.6	12.7667	1.44338
262500	21.2	8.8	21.2	17.0667	7.15914
263000	11.2	5	11.2	9.13333	3.57957
263500	12.6	8.8	12.6	11.3333	2.19393
264000	17.1	11	19	15.7	4.17971
264500	9.4	7.9	9.4	8.9	0.866025
265000	13.5	8.7	13.5	11.9	2.77128
265500	18.9	6.7	18.9	14.8333	7.04367
266000	20.2	7.8	20.2	16.0667	7.15914
266500	21.4	5.5	21.4	16.1	9.17987
267000	13.4	10.5	13.4	12.4333	1.67432
267500	14.6	6	14.6	11.7333	4.96521
268000	13.6	5.8	13.6	11	4.50333
268500	11.1	9	11.1	10.4	1.21244
269000	20.6	7	20.6	16.0667	7.85196
269500	15.2	9	15.2	13.1333	3.57957
270000	13.1	12.9	13.1	13.0333	0.11547
270500	14.1	6.2	14.1	11.4667	4.56107
271000	7.5	2.9	7.5	5.96667	2.65581
271500	16.6	10.2	16.6	14.4667	3.69504
272000	18.7	13.8	18.7	17.0667	2.82902
272500	13.7	5.9	13.7	11.1	4.50333
273000	15.6	6.9	15.6	12.7	5.02295
273500	21	14.9	21	18.9667	3.52184
274000	11.6	6	11.6	9.73333	3.23316
274500	11.5	3.9	11.5	8.96667	4.38786
275000	14.7	7.8	14.7	12.4	3.98372
275500	7.1	6.6	7.1	6.93333	0.288675
276000	23.6	7.6	23.6	18.2667	9.2376
276500	15.2	6.3	15.2	12.2333	5.13842
277000	12.4	3.4	12.4	9.4	5.19615
277500	14.9	9.1	14.9	12.9667	3.34863
278000	19	11.4	19	16.4667	4.38786
278500	20.9	7.7	20.9	16.5	7.62102
279000	12.1	7	12.1	10.4	2.94449
279500	9.4	7.6	9.4	8.8	1.03923
280000	12	8.6	13.8	11.4667	2.64071
280500	20.9	2.6	20.9	14.8	10.5655
281000	21.2	12	21.2	18.1333	5.31162
281500	11	9.6	11	10.5333	0.80829
282000	19.6	8.6	19.6	15.9333	6.35085
282500	11.1	6.3	11.1	9.5	2.77128
283000	19.6	6.5	19.6	15.2333	7.56329
283500	17.3	8	17.3	14.2	5.36936
284000	10.1	11.7	10.1	10.6333	0.92376
284500	9.3	8.2	9.3	8.93333	0.635085
285000	18.3	10.3	18.3	15.6333	4.6188
285500	9.6	11.1	9.6	10.1	0.866025
286000	14	8.3	14	12.1	3.2909
286500	17.6	4.6	17.6	13.2667	7.50555
287000	17.1	8.8	17.1	14.3333	4.79201
287500	11.7	9.5	11.7	10.9667	1.27017
288000	6.1	7.2	6.1	6.46667	0.635085
288500	17.4	6	17.4	13.6	6.58179
289000	14.2	8.2	14.2	12.2	3.4641
289500	19.3	7.7	19.3	15.4333	6.69726
290000	10.3	7.3	10.3	9.3	1.73205
290500	14.6	4.8	14.6	11.3333	5.65803
291000	20.1	3.5	20.1	14.5667	9.58401
291500	17.7	5.4	17.7	13.6	7.10141
292000	11.1	8.5	12.7	10.7667	2.11975
292500	10.8	4.2	12.9	9.3	4.53982
293000	20.2	6.2	20.2	15.5333	8.0829
293500	16.8	4.3	18.5	13.2	7.75435
294000	21.1	11.5	21.9	18.1667	5.78734
294500	7.7	8.8	9.3	8.6	0.818535
295000	15.9	8.2	17.7	13.9333	5.04612
295500	13.6	7.4	14.2	11.7333	3.76475
296000	13.2	8.6	13.2	11.6667	2.65581
296500	14	6.7	14	11.5667	4.21466
297000	24	7.1	24	18.3667	9.75722
297500	14.5	12.5	14.5	13.8333	1.1547
298000	14.1	5.5	14.1	11.2333	4.96521
298500	9.2	10.2	9.2	9.53333	0.57735
299000	20.9	10.6	22	17.8333	6.28835
299500	14.1	5.2	15.6	11.6333	5.62168
300000	9	11.8	9	9.93333	1.61658
300500	12.5	13.2	12.5	12.7333	0.404145
301000	24.3	12.8	24.3	20.4667	6.63953
301500	18.9	8.7	18.9	15.5	5.88897
302000	13.1	6.9	13.1	11.0333	3.57957
302500	17.2	5	17.2	13.1333	7.04367
303000	24.6	5.1	24.6	18.1	11.2583
303500	15.6	13.3	15.6	14.8333	1.32791
304000	18.4	7.6	18.4	14.8	6.23538
304500	21.9	7.9	21.9	17.2333	8.0829
305000	13.1	7	13.1	11.0667	3.52184
305500	8.6	9.5	8.6	8.9	0.519615
306000	15.6	11.9	15.6	14.3667	2.1362
306500	12.6	5.5	12.6	10.2333	4.09919
307000	20.3	11.9	20.3	17.5	4.84974
307500	9	8.1	9	8.7	0.519615
308000	16.9	2.9	16.9	12.2333	8.0829
308500	15	5.6	15	11.8667	5.42709
309000	20.3	4.5	20.3	15.0333	9.12213
309500	11.6	6.2	11.6	9.8	3.11769
310000	8.4	12.8	8.4	9.86667	2.54034
310500	6.7	6.9	6.7	6.76667	0.11547
311000	12.3	5.7	12.3	10.1	3.81051
311500	20.5	5.7	20.5	15.5667	8.54478
312000	14.3	3.2	14.3	10.6	6.40859
312500	15.6	3.3	15.6	11.5	7.10141
313000	14.8	5.4	14.8	11.6667	5.42709
313500	10.9	10.4	11.5	10.9333	0.550757
314000	14.5	13.5	16.3	14.7667	1.41892
314500	17.3	10.1	17.3	14.9	4.15692
315000	8	12.2	9.6	9.93333	2.11975
315500	15.8	8.3	15.8	13.3	4.33013
316000	20	9.7	20	16.5667	5.94671
316500	17	9.5	17	14.5	4.33013
317000	9.9	10	9.9	9.93333	0.057735
317500	21.4	6.9	21.4	16.5667	8.37158
318000	10.4	7.3	10.4	9.36667	1.78979
318500	5.4	10.1	5.4	6.96667	2.71355
319000	15.8	5.8	15.8	12.4667	5.7735
319500	18.5	8	18.5	15	6.06218
320000	16.6	15	16.6	16.0667	0.92376
320500	11.5	7.5	11.5	10.1667	2.3094
321000	15.7	5.7	15.7	12.3667	5.7735
321500	19.7	8.4	19.7	15.9333	6.52406
322000	18.4	7.2	18.4	14.6667	6.46632
322500	18.7	12.4	18.7	16.6	3.63731
323000	14.8	9.3	16.7	13.6	3.84318
323500	13.4	8.9	13.4	11.9	2.59808
324000	14.2	9.3	14.2	12.5667	2.82902
324500	12.9	15.8	12.9	13.8667	1.67432
325000	14.2	3.8	14.2	10.7333	6.00444
325500	24.2	4.9	24.2	17.7667	11.1429
326000	12.8	8.2	12.8	11.2667	2.65581
326500	22.1	7.1	22.1	17.1	8.66025
327000	16.2	4.7	16.2	12.3667	6.63953
327500	17	4.8	17	12.9333	7.04367
328000	19.7	7	19.7	15.4667	7.33235
328500	12.7	6.7	12.7	10.7	3.4641
329000	15.6	11.4	15.6	14.2	2.42487
329500	16	8.4	16	13.4667	4.38786
330000	12.3	12.8	12.3	12.4667	0.288675
330500	17	9	19.2	15.0667	5.36781
331000	7.3	7.2	8.7	7.73333	0.83865
331500	10.1	11.2	10.1	10.4667	0.635085
332000	9.3	12.5	9.3	10.3667	1.84752
332500	22.1	11	22.1	18.4	6.40859
333000	17	7.8	17	13.9333	5.31162
333500	21.2	7.8	24.8	17.9333	8.95842
334000	13.6	5.6	13.6	10.9333	4.6188
334500	11.1	7.1	11.1	9.76667	2.3094
335000	9.3	5.8	9.3	8.13333	2.02073
335500	16.6	3.4	16.6	12.2	7.62102
336000	6.4	16.4	6.4	9.73333	5.7735
336500	10.2	13.5	10.2	11.3	1.90526
337000	12.7	8.2	12.7	11.2	2.59808
337500	5.8	12	5.8	7.86667	3.57957
338000	4.8	6.6	4.8	5.4	1.03923
338500	15.2	7.6	15.2	12.6667	4.38786
339000	4.2	5.5	4.2	4.63333	0.750555
339500	4.8	5.6	4.8	5.06667	0.46188
340000	7.7	9.8	7.7	8.4	1.21244
340500	9.5	11.7	9.5	10.2333	1.27017
341000	11	8.7	11	10.2333	1.32791
341500	7.3	5.5	7.3	6.7	1.03923
342000	17.6	12.8	17.6	16	2.77128
342500	6.9	17	6.9	10.2667	5.83124
343000	5.2	4.1	5.2	4.83333	0.635085
343500	9.7	10.2	9.7	9.86667	0.288675
344000	7.6	13.1	7.6	9.43333	3.17543
344500	8.6	12	10	10.2	1.7088
345000	7.6	9.7	7.7	8.33333	1.18462
345500	8.5	16.4	8.5	11.1333	4.56107
346000	16	9.5	16	13.8333	3.75278
346500	9.5	10.4	10.7	10.2	0.6245
347000	7.5	5.6	7.5	6.86667	1.09697
347500	11.6	15.3	11.6	12.8333	2.1362
348000	19.3	16.3	19.3	18.3	1.73205
348500	13.4	12.5	14.8	13.5667	1.15902
349000	11.4	10.1	11.4	10.9667	0.750555
349500	10.5	10.4	10.5	10.4667	0.057735
350000	11.1	9	11.1	10.4	1.21244
350500	7.4	5.5	7.4	6.76667	1.09697
351000	5.8	9.3	7.2	7.43333	1.76163
351500	9.5	13.4	13.8	12.2333	2.37557
352000	11.1	10.9	11.1	11.0333	0.11547
352500	13.4	7.6	13.4	11.4667	3.34863
353000	10	4.2	10	8.06667	3.34863
353500	7.7	9.4	7.7	8.26667	0.981495
354000	9.7	5.6	9.7	8.33333	2.36714
354500	7	7.8	8.4	7.73333	0.702377
355000	7	10.1	7.1	8.06667	1.76163
355500	6.6	4.7	8.3	6.53333	1.80093
356000	8.7	6.1	8.7	7.83333	1.50111
356500	7.2	12.7	7.2	9.03333	3.17543
357000	11.2	5.9	11.2	9.43333	3.05996
357500	10.5	6.9	10.5	9.3	2.07846
358000	11.5	9	13	11.1667	2.02073
358500	9.3	8.7	10.9	9.63333	1.13725
359000	7.3	6.4	7.4	7.03333	0.550757
359500	4.9	6.8	4.9	5.53333	1.09697
360000	9.3	7.8	9.3	8.8	0.866025
360500	20.7	9	20.7	16.8	6.755
361000	19.1	7.2	19.1	15.1333	6.87047
361500	10.7	3.6	10.7	8.33333	4.09919
362000	9.6	6.1	9.6	8.43333	2.02073
362500	12	5.9	12	9.96667	3.52184
363000	12.5	7.2	14.1	11.2667	3.61156
363500	14.3	6.3	16.1	12.2333	5.21664
364000	9.3	3.6	9.3	7.4	3.2909
364500	9	5	9	7.66667	2.3094
365000	12.6	4.8	12.6	10	4.50333
365500	13.6	4.1	13.6	10.4333	5.48483
366000	15.4	5.9	15.4	12.2333	5.48483
366500	6.4	4.9	6.4	5.9	0.866025
367000	10	7.2	10	9.06667	1.61658
367500	13.1	5.9	16.9	11.9667	5.58689
368000	6.3	3	6.3	5.2	1.90526
368500	11.4	4.7	11.4	9.16667	3.86825
369000	8.5	4.1	9.8	7.46667	2.98719
369500	6.2	12.2	6.2	8.2	3.4641
370000	4.6	9.3	4.6	6.16667	2.71355
370500	16.4	2.9	16.4	11.9	7.79423
371000	3.5	1.1	3.5	2.7	1.38564
371500	8.2	1.8	8.2	6.06667	3.69504
372000	17.1	7.7	17.1	13.9667	5.42709
372500	12.9	6.9	12.9	10.9	3.4641
373000	7.2	5.6	7.2	6.66667	0.92376
373500	2.9	7.7	2.9	4.5	2.77128
374000	7.4	6.6	7.4	7.13333	0.46188
374500	9.1	8.8	9.1	9	0.173205
375000	13.6	6.9	13.6	11.3667	3.86825
375500	11.2	16	11.2	12.8	2.77128
376000	9.5	5.9	9.5	8.3	2.07846
376500	12	6.6	12	10.2	3.11769
377000	12.4	6.6	12.4	10.4667	3.34863
377500	14.2	6.1	14.2	11.5	4.67654
378000	10.8	8.8	10.8	10.1333	1.1547
378500	17.3	9.4	17.3	14.6667	4.56107
379000	15.7	8.8	15.7	13.4	3.98372
379500	13.6	3.2	13.6	10.1333	6.00444
380000	12.2	1.6	12.2	8.66667	6.11991
380500	14.7	4.5	14.7	11.3	5.88897
381000	19.2	6	19.2	14.8	7.62102
381500	13.1	3.5	13.1	9.9	5.54256
382000	10.1	7.4	10.1	9.2	1.55885
382500	14	4.5	14	10.8333	5.48483
383000	15.7	9.2	15.7	13.5333	3.75278
383500	11.8	7.4	11.8	10.3333	2.54034
384000	8.5	10.6	8.5	9.2	1.21244
384500	9	5.6	10.5	8.36667	2.51064
385000	9.8	4.3	9.8	7.96667	3.17543
385500	10.2	17.4	12	13.2	3.747
386000	15.6	11.6	15.6	14.2667	2.3094
386500	7	7.7	7	7.23333	0.404145
387000	14.5	5.3	14.5	11.4333	5.31162
387500	8.6	8.4	8.6	8.53333	0.11547
388000	9.4	7.9	9.4	8.9	0.866025
388500	15.7	12.6	15.7	14.6667	1.78979
389000	10.1	5.5	10.1	8.56667	2.65581
389500	5.6	7.7	7.1	6.8	1.08167
390000	21.6	4.2	22.8	16.2	10.4096
390500	8.8	4.6	8.8	7.4	2.42487
391000	8.1	5.6	8.1	7.26667	1.44338
391500	16.7	6.1	16.7	13.1667	6.11991
392000	16.8	7	16.8	13.5333	5.65803
392500	12.3	5.8	12.3	10.1333	3.75278
393000	6.4	9.8	6.4	7.53333	1.96299
393500	4	9.8	4	5.93333	3.34863
394000	7.1	6.3	7.1	6.83333	0.46188
394500	23.3	7.9	23.3	18.1667	8.89119
395000	9.6	11.8	9.6	10.3333	1.27017
395500	5.7	9.8	5.7	7.06667	2.36714
396000	15.7	6.5	15.7	12.6333	5.31162
396500	5.7	3	5.7	4.8	1.55885
397000	5.1	3.3	5.1	4.5	1.03923
397500	10.3	8.3	10.3	9.63333	1.1547
398000	6.7	3.1	8.4	6.06667	2.70617
398500	9.6	6.9	9.6	8.7	1.55885
399000	9.1	7.2	9.1	8.46667	1.09697
399500	12.7	3.2	12.7	9.53333	5.48483
400000	5.2	4.5	5.2	4.96667	0.404145
400500	11.6	7.4	11.6	10.2	2.42487
401000	7	12.6	7	8.86667	3.23316
401500	7.8	5.6	7.8	7.06667	1.27017
402000	3.9	8.5	3.9	5.43333	2.65581
402500	10.1	7	10.1	9.06667	1.78979
403000	11.2	5.2	11.2	9.2	3.4641
403500	8.9	3.1	10.3	7.43333	3.8175
404000	5.7	3	5.7	4.8	1.55885
404500	18.6	3.5	18.6	13.5667	8.71799
405000	8.8	3.9	8.8	7.16667	2.82902
405500	13.8	11	13.8	12.8667	1.61658
406000	10.3	5.7	10.3	8.76667	2.65581
406500	7.5	4.5	7.5	6.5	1.73205
407000	15.4	3.3	15.4	11.3667	6.98594
407500	11	9.4	11	10.4667	0.92376
408000	5.8	4.3	5.8	5.3	0.866025
408500	7.2	9.8	9	8.66667	1.33167
409000	8.6	3.7	8.6	6.96667	2.82902
409500	9.4	11.4	9.4	10.0667	1.1547
410000	10.9	3.6	10.9	8.46667	4.21466
410500	9.3	4.1	9.3	7.56667	3.00222
411000	7.3	7.3	7.3	7.3	0
411500	13.9	4.1	13.9	10.6333	5.65803
412000	5.6	8.7	5.6	6.63333	1.78979
412500	10.4	5.8	10.4	8.86667	2.65581
413000	8.1	5.9	8.1	7.36667	1.27017
413500	12.2	4.7	12.2	9.7	4.33013
414000	17.4	1.2	17.4	12	9.35307
414500	8.9	4.2	8.9	7.33333	2.71355
415000	14.7	5.6	14.7	11.6667	5.25389
415500	3.4	6.2	3.4	4.33333	1.61658
416000	5.5	8.6	5.5	6.53333	1.78979
416500	3.5	2.1	3.5	3.03333	0.80829
417000	15.6	3.8	15.6	11.6667	6.81273
417500	12.7	6	12.7	10.4667	3.86825
418000	7.8	8.4	7.8	8	0.34641
418500	7.6	6.6	7.6	7.26667	0.57735
419000	5.4	7.7	5.4	6.16667	1.32791
419500	8	3.5	8	6.5	2.59808
420000	10.2	6.2	10.2	8.86667	2.3094
420500	7.7	5.5	7.7	6.96667	1.27017
421000	8.5	9.4	8.5	8.8	0.519615
421500	8.4	8.7	8.4	8.5	0.173205
422000	6.8	5.1	6.8	6.23333	0.981495
422500	8.2	4.9	8.2	7.1	1.90526
423000	12.2	8.1	12.2	10.8333	2.36714
423500	19	4.2	19	14.0667	8.54478
424000	8.8	4.5	8.8	7.36667	2.48261
424500	10.1	3.7	11.5	8.43333	4.15853
425000	12.2	3.1	12.2	9.16667	5.25389
425500	9.3	2.8	9.3	7.13333	3.75278
426000	6.4	4.2	6.4	5.66667	1.27017
426500	5.1	4.2	5.1	4.8	0.519615
427000	7.4	4.2	7.4	6.33333	1.84752
427500	8.2	5.8	8.2	7.4	1.38564
428000	11.2	9.2	11.2	10.5333	1.1547
428500	11.4	5.5	11.4	9.43333	3.40637
429000	10.3	2.3	10.3	7.63333	4.6188
429500	9	3.5	9	7.16667	3.17543
430000	5.9	7.3	5.9	6.36667	0.80829
430500	5.2	6	5.2	5.46667	0.46188
431000	13.1	7.4	13.1	11.2	3.2909
431500	12.6	6	12.6	10.4	3.81051
432000	11.7	3.7	13	9.46667	5.0362
432500	5.4	4.7	7.2	5.76667	1.2897
433000	12.2	9.5	12.2	11.3	1.55885
433500	10.3	11.3	10.3	10.6333	0.57735
434000	8.2	3.8	8.2	6.73333	2.54034
434500	16.4	8.8	16.4	13.8667	4.38786
435000	10.6	5.3	10.6	8.83333	3.05996
435500	17.7	8.6	17.7	14.6667	5.25389
436000	16.8	9.1	16.8	14.2333	4.4456
436500	11.4	10.4	11.4	11.0667	0.57735
437000	8.1	4.3	8.1	6.83333	2.19393
437500	5.3	8.1	5.3	6.23333	1.61658
438000	9.4	16.4	9.4	11.7333	4.04145
438500	12.8	7.7	12.8	11.1	2.94449
439000	12.6	6.5	13	10.7	3.6428
439500	11.4	12.4	14.6	12.8	1.63707
440000	3.8	5.5	6.2	5.16667	1.23423
440500	4.2	8.8	9.4	7.46667	2.84488
441000	12.7	7.3	14.5	11.5	3.747
441500	12.1	5.3	12.1	9.83333	3.92598
442000	8	7.8	8	7.93333	0.11547
442500	6.8	5.1	6.8	6.23333	0.981495
443000	13.2	5.1	14	10.7667	4.92375
443500	6.1	7.1	11	8.06667	2.58908
444000	5	5.6	6.2	5.6	0.6
444500	10.3	4.2	10.8	8.43333	3.67469
445000	9.4	5.7	10.9	8.66667	2.67644
445500	3.3	11.7	4.9	6.63333	4.46019
446000	11.2	13.1	17.8	14.0333	3.39755
446500	6.3	3.6	6.3	5.4	1.55885
447000	8.7	5	9.9	7.86667	2.55408
447500	10.7	7.1	12.5	10.1	2.74955
448000	12.5	9	16.2	12.5667	3.60046
448500	8.5	17.4	10.3	12.0667	4.70567
449000	10.3	10.7	11.2	10.7333	0.450925
449500	7.4	6.7	7.4	7.16667	0.404145
450000	7.8	5.6	11	8.13333	2.71539
450500	7	7.2	8.7	7.63333	0.929157
451000	9.7	7.6	13.8	10.3667	3.15331
451500	12.1	7.3	12.1	10.5	2.77128
452000	4.7	11.8	6.3	7.6	3.72424
452500	8.6	14.3	9.7	10.8667	3.02379
453000	10.4	8.4	10.4	9.73333	1.1547
453500	6.8	5.1	8.1	6.66667	1.50444
454000	8.6	5.6	8.6	7.6	1.73205
454500	7.6	2	8.5	6.03333	3.52184
455000	7.7	5.4	9.9	7.66667	2.25019
455500	6.9	4.1	6.9	5.96667	1.61658
456000	9.6	10.9	9.6	10.0333	0.750555
456500	6.9	5	7.2	6.36667	1.19304
457000	8.4	3.1	12.1	7.86667	4.52364
457500	11.1	5.4	11.1	9.2	3.2909
458000	13	3.8	13	9.93333	5.31162
458500	7.2	4.7	11.5	7.8	3.43948
459000	9.1	10	10.9	10	0.9
459500	10.3	8.2	10.8	9.76667	1.37961
460000	8.3	5	8.3	7.2	1.90526
460500	11.3	11.2	12.9	11.8	0.953939
461000	10.5	4.9	13.9	9.76667	4.54459
461500	4.3	12.2	4.7	7.06667	4.45009
462000	2.4	15.2	4	7.2	6.97424
462500	3.1	4.3	5.2	4.2	1.05357
463000	10.8	8.6	10.8	10.0667	1.27017
463500	8.5	7	8.5	8	0.866025
464000	13.7	7.1	13.7	11.5	3.81051
464500	12.9	5.5	12.9	10.4333	4.27239
465000	13.6	8	13.6	11.7333	3.23316
465500	14.9	6.9	21.3	14.3667	7.2148
466000	6.3	8.3	7.9	7.5	1.0583
466500	7.8	6.4	11	8.4	2.35797
467000	10.3	6.5	11.8	9.53333	2.73191
467500	4	9.5	4.2	5.9	3.11929
468000	8.4	6.2	8.4	7.66667	1.27017
468500	12.6	12.8	14.4	13.2667	0.986577
469000	19	4.2	19	14.0667	8.54478
469500	15.6	5.3	17.4	12.7667	6.52865
470000	10.7	10.5	10.7	10.6333	0.11547
470500	9.3	8	11.2	9.5	1.60935
471000	13.3	1.7	15.2	10.0667	7.30776
471500	9.1	2.9	9.1	7.03333	3.57957
472000	12.2	9.8	12.2	11.4	1.38564
472500	15.1	6.9	18.5	13.5	5.96322
473000	10.9	10.7	10.9	10.8333	0.11547
473500	3.6	5.9	3.9	4.46667	1.25033
474000	6.8	8.3	7.9	7.66667	0.776745
474500	10.5	10.4	10.5	10.4667	0.057735
475000	11.6	4.1	11.6	9.1	4.33013
475500	12	4.1	12	9.36667	4.56107
476000	6.1	13.5	7.7	9.1	3.89358
476500	16.9	7.5	16.9	13.7667	5.42709
477000	14.2	6.1	17.7	12.6667	5.95007
477500	7.1	8.4	7.1	7.53333	0.750555
478000	11.3	6.1	13.2	10.2	3.6756
478500	8.9	9.3	10.8	9.66667	1.00167
479000	10.3	13.3	10.3	11.3	1.73205
479500	14.1	9.2	14.1	12.4667	2.82902
480000	13.3	8.5	14.8	12.2	3.2909
480500	15	4.8	15	11.6	5.88897
481000	13.7	2.4	13.7	9.93333	6.52406
481500	8.7	3.5	10.1	7.43333	3.47755
482000	6.8	5	6.9	6.23333	1.06927
482500	11.1	1.3	12.7	8.36667	6.17198
483000	7.1	4	7.1	6.06667	1.78979
483500	4.8	7.5	4.8	5.7	1.55885
484000	7.3	8.3	9.7	8.43333	1.20554
484500	12.8	3.5	12.8	9.7	5.36936
485000	4	1.5	4	3.16667	1.44338
485500	13.3	1.7	13.3	9.43333	6.69726
486000	12.3	6.6	14	10.9667	3.87599
486500	8.7	6.9	8.7	8.1	1.03923
487000	15.9	9	15.9	13.6	3.98372
487500	9.8	6.4	9.8	8.66667	1.96299
488000	12.5	14.8	13.8	13.7	1.15326
488500	8.9	4.7	11.9	8.5	3.61663
489000	11.8	5.2	11.8	9.6	3.81051
489500	4.7	8.9	4.7	6.1	2.42487
490000	12.5	8.9	13.9	11.7667	2.57941
490500	16.1	6.5	16.1	12.9	5.54256
491000	9	8.7	10.8	9.5	1.13578
491500	11.4	7.6	13	10.6667	2.77369
492000	11.5	12	12.7	12.0667	0.602771
492500	7.3	4.5	7.3	6.36667	1.61658
493000	9.8	4	9.8	7.86667	3.34863
493500	9.9	9.8	9.9	9.86667	0.057735
494000	9.3	11.2	11.2	10.5667	1.09697
494500	16.2	8.1	16.2	13.5	4.67654
495000	15.8	10.3	17.5	14.5333	3.76342
495500	12.5	9.2	12.5	11.4	1.90526
496000	9.7	4.6	9.7	8	2.94449
496500	17.8	8.2	19.6	15.2	6.12862
497000	12.5	4.6	14	10.3667	5.05008
497500	9	6.4	10.5	8.63333	2.07445
498000	6.5	4.3	6.5	5.76667	1.27017
498500	9.7	8.7	9.7	9.36667	0.57735
499000	11.8	15.7	13.4	13.6333	1.96044
499500	7.1	10.1	10.7	9.3	1.92873
500000	11.5	8.6	16.2	12.1	3.83536
500500	10.6	14.3	10.6	11.8333	2.1362
501000	6	6	6	6	0
501500	10.9	6.6	10.9	9.46667	2.48261
502000	20.1	5.8	20.1	15.3333	8.25611
502500	13.8	13.2	13.8	13.6	0.34641
503000	6	9.4	6	7.13333	1.96299
503500	4.2	8.1	4.2	5.5	2.25167
504000	8.4	15.6	8.4	10.8	4.15692
504500	11.7	6.4	11.7	9.93333	3.05996
505000	11.7	10.1	11.7	11.1667	0.92376
505500	10.8	6.4	12.2	9.8	3.02655
506000	11.8	10.1	11.8	11.2333	0.981495
506500	7.5	3.4	7.5	6.13333	2.36714
507000	16.2	3.6	17.6	12.4667	7.7106
507500	9.3	2.3	9.3	6.96667	4.04145
508000	12.7	6.1	12.7	10.5	3.81051
508500	8.4	5.2	10.1	7.9	2.48797
509000	6.8	4	6.8	5.86667	1.61658
509500	8.9	9.6	8.9	9.13333	0.404145
510000	10.2	10.8	10.2	10.4	0.34641
510500	17.7	9.7	19.5	15.6333	5.21664
511000	4.8	12.1	6.5	7.8	3.81969
511500	12.1	10.1	13.8	12	1.85203
512000	9.4	12.5	9.4	10.4333	1.78979
512500	12.6	6.2	12.6	10.4667	3.69504
513000	8.3	3.9	8.3	6.83333	2.54034
513500	13.1	6.8	13.1	11	3.63731
514000	9.3	7.7	9.3	8.76667	0.92376
514500	5.1	10.8	5.1	7	3.2909
515000	4.2	9.8	4.2	6.06667	3.23316
515500	8.8	7.6	10.3	8.9	1.35277
516000	6.5	7.1	6.5	6.7	0.34641
516500	10.6	1.6	10.6	7.6	5.19615
517000	15.9	2.8	15.9	11.5333	7.56329
517500	6.5	2.4	8.6	5.83333	3.15331
518000	5.9	3.8	8.8	6.16667	2.51064
518500	7.4	7.6	7.4	7.46667	0.11547
519000	8.5	8.9	9.9	9.1	0.72111
519500	5	7.1	5.5	5.86667	1.09697
520000	5.4	6.5	7.2	6.36667	0.907377
520500	8.3	3.3	9.5	7.03333	3.28836
521000	4.4	7.9	4.4	5.56667	2.02073
521500	8.3	5.5	8.3	7.36667	1.61658
522000	10.4	3.3	10.4	8.03333	4.09919
522500	12.3	4.8	12.3	9.8	4.33013
523000	6.7	9.2	6.7	7.53333	1.44338
523500	5.1	2.9	5.1	4.36667	1.27017
524000	5.9	3.3	7.3	5.5	2.02978
524500	5.3	8.7	7.1	7.03333	1.70098
525000	6.3	5	7.3	6.2	1.15326
525500	8.1	2.4	8.1	6.2	3.2909
526000	9.8	12.4	11.2	11.1333	1.30128
526500	7.3	9.4	7.3	8	1.21244
527000	8.2	7.8	8.2	8.06667	0.23094
527500	16.2	7.9	16.2	13.4333	4.79201
528000	12.6	5.5	12.6	10.2333	4.09919
528500	7.4	7	7.4	7.26667	0.23094
529000	4.1	5.4	4.1	4.53333	0.750555
529500	8.1	4.8	9.1	7.33333	2.25019
530000	4.6	3	5.3	4.3	1.17898
530500	8.8	11.7	8.8	9.76667	1.67432
531000	6.2	10.6	7.8	8.2	2.22711
531500	5.9	10.4	7.4	7.9	2.29129
532000	3.9	11.7	5.3	6.96667	4.15853
532500	9.6	6.1	9.8	8.5	2.08087
533000	7.2	6.7	7.2	7.03333	0.288675
533500	16.5	10.8	16.5	14.6	3.2909
534000	5.3	10.6	7.1	7.66667	2.69506
534500	12.4	6.8	13.9	11.0333	3.7421
535000	9	8.3	10.9	9.4	1.34536
535500	13.5	4.1	13.5	10.3667	5.42709
536000	8.1	2.7	8.1	6.3	3.11769
536500	4.2	9.5	4.2	5.96667	3.05996
537000	7.9	9.2	7.9	8.33333	0.750555
537500	8.4	10.4	10	9.6	1.0583
538000	11.7	13.4	11.7	12.2667	0.981495
538500	8	14.3	8	10.1	3.63731
539000	7.8	9.2	10.9	9.3	1.55242
539500	15.2	8.8	15.2	13.0667	3.69504
540000	11.9	11.1	15.3	12.7667	2.2301
540500	8.7	7.2	10.4	8.76667	1.60104
541000	10.5	4.1	12.7	9.1	4.46766
541500	12.6	8.4	11.3	10.7667	2.15019
542000	10.9	6.2	12.2	9.76667	3.15647
542500	17.5	8.6	10.3	12.1333	4.72476
543000	4	13.5	4	7.16667	5.48483
543500	3.9	7.8	3.9	5.2	2.25167
544000	3.9	6.3	3.9	4.7	1.38564
544500	2.3	2.9	2.3	2.5	0.34641
545000	1.8	4.4	1.8	2.66667	1.50111
545500	0.9	5.1	0.9	2.3	2.42487
546000	3.2	2.4	3.2	2.93333	0.46188
546500	5.1	2	5.1	4.06667	1.78979
547000	1.7	3.6	3	2.76667	0.971253
547500	0.8	5.6	1.6	2.66667	2.57164
548000	1.5	9.9	2.4	4.6	4.61194
548500	15	5	18.3	12.7667	6.92556
549000	5.1	6.2	6.1	5.8	0.608276
549500	5.8	4.4	8.1	6.1	1.86815
550000	5.1	6.4	5.1	5.53333	0.750555
550500	3.8	15.3	3.8	7.63333	6.63953
551000	9.9	13	11.3	11.4	1.55242
551500	4.7	8.9	4.7	6.1	2.42487
552000	3.7	13.6	3.7	7	5.71577
552500	4.3	16.1	5.4	8.6	6.51844
553000	8.3	7	8.3	7.86667	0.750555
553500	11	7.2	11	9.73333	2.19393
554000	4.6	10.3	6.7	7.2	2.88271
554500	8.1	10.3	10.8	9.73333	1.43643
555000	6.7	7.1	6.7	6.83333	0.23094
555500	7.5	7.5	7.5	7.5	0
556000	2.9	7.5	4.3	4.9	2.35797
556500	4.7	6.9	4.9	5.5	1.21655
557000	8.1	11.3	8.1	9.16667	1.84752
557500	6.5	12.5	6.5	8.5	3.4641
558000	5.2	10.5	6.3	7.33333	2.79702
558500	10.8	8.9	10.8	10.1667	1.09697
559000	6.1	9.7	6.1	7.3	2.07846
559500	9.6	13.1	9.6	10.7667	2.02073
560000	10.8	4.7	10.8	8.76667	3.52184
560500	14.3	7.3	17.8	13.1333	5.34634
561000	7.5	10.9	7.5	8.63333	1.96299
561500	5.5	8.4	5.5	6.46667	1.67432
562000	7.2	12.4	7.2	8.93333	3.00222
562500	10.6	15.6	10.6	12.2667	2.88675
563000	7.9	18.9	12.7	13.1667	5.51483
563500	9.5	13.1	11.4	11.3333	1.80093
564000	4.1	18.3	4.1	8.83333	8.19837
564500	4	11.1	4	6.36667	4.09919
565000	10.5	10.4	12.2	11.0333	1.0116
565500	13.1	8.7	13.1	11.6333	2.54034
566000	4.8	7.7	4.8	5.76667	1.67432
566500	3.9	6.6	3.9	4.8	1.55885
567000	14.1	7.2	14.1	11.8	3.98372
567500	13.5	6.8	13.5	11.2667	3.86825
568000	9.8	10.5	9.8	10.0333	0.404145
568500	6.6	7.1	6.6	6.76667	0.288675
569000	8.3	13.5	10	10.6	2.65141
569500	4.9	17.5	6.6	9.66667	6.83691
570000	7.4	9.2	9.5	8.7	1.13578
570500	8.9	9.2	8.9	9	0.173205
571000	8.1	5.1	9.8	7.66667	2.37978
571500	4.7	6.9	5.1	5.56667	1.17189
572000	3.3	11.6	3.3	6.06667	4.79201
572500	3.2	6.4	4.8	4.8	1.6
573000	7.8	6.3	10.8	8.3	2.29129
573500	12.9	11.7	12.9	12.5	0.69282
574000	7.8	5.6	8.3	7.23333	1.43643
574500	8.8	10.2	11.7	10.2333	1.45029
575000	11.6	6.9	11.6	10.0333	2.71355
575500	9.1	10.2	9.1	9.46667	0.635085
576000	8	8.1	8	8.03333	0.057735
576500	8.4	12.8	11.1	10.7667	2.21886
577000	5.8	10.5	9.5	8.6	2.47588
577500	7.1	7.6	7.1	7.26667	0.288675
578000	6.7	5.4	6.7	6.26667	0.750555
578500	3.2	6.9	3.2	4.43333	2.1362
579000	4	7.8	4	5.26667	2.19393
579500	8.6	6.1	8.6	7.76667	1.44338
580000	6.5	7.3	6.5	6.76667	0.46188
580500	3.5	4.4	3.5	3.8	0.519615
581000	2.9	12.7	2.9	6.16667	5.65803
581500	9.7	14.2	9.7	11.2	2.59808
582000	6.2	13.4	6.5	8.7	4.07308
582500	13.5	16.3	15	14.9333	1.40119
583000	6.2	9.3	7.4	7.63333	1.56312
583500	4.8	12.1	6.4	7.76667	3.8371
584000	4.8	5.5	4.8	5.03333	0.404145
584500	5.9	3	5.9	4.93333	1.67432
585000	3.8	11.8	3.8	6.46667	4.6188
585500	3.8	14.6	3.8	7.4	6.23538
586000	5.9	15	5.9	8.93333	5.25389
586500	12.5	17.4	12.5	14.1333	2.82902
587000	5.6	9.2	5.6	6.8	2.07846
587500	2.1	15.3	2.1	6.5	7.62102
588000	2.3	11.3	2.3	5.3	5.19615
588500	12.1	10.3	12.1	11.5	1.03923
589000	3.4	13.7	3.4	6.83333	5.94671
589500	4.1	6	4.1	4.73333	1.09697
590000	8	10.5	9.2	9.23333	1.25033
590500	4.7	6.7	6.2	5.86667	1.04083
591000	2.4	5.9	2.4	3.56667	2.02073
591500	6.4	6.1	7.5	6.66667	0.737111
592000	5.5	10.7	5.5	7.23333	3.00222
592500	7.6	11.4	7.6	8.86667	2.19393
593000	7.7	11	7.7	8.8	1.90526
593500	6	9	6	7	1.73205
594000	1.7	4.4	2.2	2.76667	1.43643
594500	0.9	5.7	1.8	2.8	2.55147
595000	3.8	3.3	7.9	5	2.52389
595500	3.1	5	3.1	3.73333	1.09697
596000	4.5	12.2	5.4	7.36667	4.20991
596500	5.2	9.2	5.2	6.53333	2.3094
597000	7.1	10.3	7.1	8.16667	1.84752
597500	9.6	12.2	9.6	10.4667	1.50111
598000	8.2	8.7	8.2	8.36667	0.288675
598500	3.2	12.5	3.2	6.3	5.36936
599000	4.5	5.7	5.9	5.36667	0.757188
599500	6	3.6	7.5	5.7	1.96723
600000	8.2	9.8	8.2	8.73333	0.92376
600500	4.1	6.4	4.1	4.86667	1.32791
601000	3.6	11.5	3.6	6.23333	4.56107
601500	1.7	14.9	1.7	6.1	7.62102
602000	3.7	10.2	4.6	6.16667	3.52184
602500	5	9.9	5	6.63333	2.82902
603000	6.7	5	6.7	6.13333	0.981495
603500	6.2	9	6.2	7.13333	1.61658
604000	4.5	11.8	4.5	6.93333	4.21466
604500	10.5	10.3	12.2	11	1.04403
605000	5.6	4.1	6.9	5.53333	1.40119
605500	10.5	14.2	10.5	11.7333	2.1362
606000	3.1	16.4	3.1	7.53333	7.67876
606500	4.3	6.3	4.3	4.96667	1.1547
607000	10.7	7.4	12.1	10.0667	2.41316
607500	2.5	11.8	4	6.1	4.993
608000	2.9	12.4	4.9	6.73333	5.00833
608500	8.6	7.5	8.6	8.23333	0.635085
609000	11	10.3	11	10.7667	0.404145
609500	11.3	6.6	11.3	9.73333	2.71355
610000	2.8	4.8	2.8	3.46667	1.1547
610500	3.4	5.3	4.3	4.33333	0.950438
611000	8.4	9.5	8.4	8.76667	0.635085
611500	9.4	8.6	9.4	9.13333	0.46188
612000	13.4	2.8	13.4	9.86667	6.11991
612500	6.2	4.3	6.2	5.56667	1.09697
613000	6.2	3.3	6.2	5.23333	1.67432
613500	7	5.8	7	6.6	0.69282
614000	4.4	4.2	4.4	4.33333	0.11547
614500	3.2	3	3.2	3.13333	0.11547
615000	8.2	1.6	8.2	6	3.81051
615500	12	1.8	12	8.6	5.88897
616000	8.8	4.8	8.8	7.46667	2.3094
616500	10.1	6.3	11.8	9.4	2.81603
617000	8	4.2	8	6.73333	2.19393
617500	5.2	5.2	5.2	5.2	0
618000	6.3	6.5	6.3	6.36667	0.11547
618500	6.4	6.3	6.4	6.36667	0.057735
619000	10	9.2	10.8	10	0.8
619500	5.5	10.5	6.9	7.63333	2.57941
620000	3.9	6.7	5.2	5.26667	1.40119
620500	3.7	5.6	6.6	5.3	1.47309
621000	3.4	11.5	5.9	6.93333	4.14769
621500	6.5	2.6	6.5	5.2	2.25167
622000	7.1	1.6	7.1	5.26667	3.17543
622500	6.8	2.2	6.8	5.26667	2.65581
623000	6.6	7.1	6.6	6.76667	0.288675
623500	7.2	7.3	7.2	7.23333	0.057735
624000	3.9	4.1	3.9	3.96667	0.11547
624500	1.4	5.6	1.4	2.8	2.42487
625000	2.7	8.1	2.7	4.5	3.11769
625500	6.5	9.8	6.5	7.6	1.90526
626000	5.2	14.7	5.2	8.36667	5.48483
626500	3.1	11.2	3.1	5.8	4.67654
627000	6.8	11.8	6.8	8.46667	2.88675
627500	6.8	8.8	6.8	7.46667	1.1547
628000	4.3	6.9	4.3	5.16667	1.50111
628500	5.4	8.7	5.4	6.5	1.90526
629000	9.2	9.9	9.2	9.43333	0.404145
629500	7.2	4.7	7.2	6.36667	1.44338
630000	2	4.8	2	2.93333	1.61658
630500	1.4	6.1	1.4	2.96667	2.71355
631000	4.7	9.3	6.2	6.73333	2.34592
631500	5.8	9.5	5.8	7.03333	2.1362
632000	6.5	6.4	6.5	6.46667	0.057735
632500	3.5	7.7	4.6	5.26667	2.17792
633000	6.4	6.8	9.7	7.63333	1.80093
633500	5.7	7.4	6.5	6.53333	0.85049
634000	10.9	4.3	12.5	9.23333	4.34665
634500	3.3	9.6	3.3	5.4	3.63731
635000	3	11	3	5.66667	4.6188
635500	5.9	22	5.9	11.2667	9.29534
636000	9.6	10.1	9.6	9.76667	0.288675
636500	10.2	10.6	10.2	10.3333	0.23094
637000	7.7	7.9	7.7	7.76667	0.11547
637500	5.3	11.3	5.3	7.3	3.4641
638000	4.5	9.3	5.4	6.4	2.55147
638500	2.7	14.3	5.6	7.53333	6.03683
639000	2.7	10.6	2.8	5.36667	4.53248
639500	3.6	4.4	3.6	3.86667	0.46188
640000	6.8	9.8	6.8	7.8	1.73205
640500	10.1	4.4	10.1	8.2	3.2909
641000	6.3	6.1	7.8	6.73333	0.929157
641500	11.8	9.9	11.8	11.1667	1.09697
642000	8.6	19	10.3	12.6333	5.57883
642500	7.5	5.8	9.2	7.5	1.7
643000	8.3	8	8.3	8.2	0.173205
643500	5.6	9.1	5.6	6.76667	2.02073
644000	10.2	6.9	10.2	9.1	1.90526
644500	11.2	7.6	11.2	10	2.07846
645000	10.5	9.4	10.5	10.1333	0.635085
645500	10	10.8	10	10.2667	0.46188
646000	7.1	9.8	7.1	8	1.55885
646500	9.5	8.3	9.5	9.1	0.69282
647000	6.3	5.8	6.5	6.2	0.360555
647500	2.7	8.8	4.1	5.2	3.19531
648000	5.7	8.1	5.7	6.5	1.38564
648500	9.6	7.9	9.6	9.03333	0.981495
649000	6.4	3.6	6.4	5.46667	1.61658
649500	7	4.4	8.4	6.6	2.02978
650000	10.4	11.2	10.4	10.6667	0.46188
650500	4.2	5.4	4.2	4.6	0.69282
651000	9.3	5.2	9.3	7.93333	2.36714
651500	9.3	7	9.3	8.53333	1.32791
652000	11.5	7.9	12.8	10.7333	2.53837
652500	8.6	4.4	10.3	7.76667	3.03699
653000	9.6	8	9.6	9.06667	0.92376
653500	7.6	4.5	7.6	6.56667	1.78979
654000	8.2	5.2	8.2	7.2	1.73205
654500	5.3	11.5	6.7	7.83333	3.25167
655000	7.7	8.9	7.7	8.1	0.69282
655500	8.6	6.6	8.6	7.93333	1.1547
656000	11.8	8.7	11.8	10.7667	1.78979
656500	7.2	3.3	7.2	5.9	2.25167
657000	14.3	5.3	14.3	11.3	5.19615
657500	4.4	16	4.4	8.26667	6.69726
658000	4.8	8.3	4.8	5.96667	2.02073
658500	8.2	13.7	8.2	10.0333	3.17543
659000	2.6	10.3	2.8	5.23333	4.389
659500	3.3	5.9	4.4	4.53333	1.30512
660000	5	11.3	5	7.1	3.63731
660500	11.1	10.1	11.1	10.7667	0.57735
661000	6.3	8.7	8.2	7.73333	1.26623
661500	9.4	7.1	11.2	9.23333	2.05508
662000	13.6	5.9	13.6	11.0333	4.4456
662500	9.3	21.7	9.3	13.4333	7.15914
663000	5.6	18.6	5.6	9.93333	7.50555
663500	4.6	11	4.6	6.73333	3.69504
664000	9.7	8.5	9.7	9.3	0.69282
664500	11.5	5.1	11.5	9.36667	3.69504
665000	5.3	10.6	5.3	7.06667	3.05996
665500	6.1	12	6.1	8.06667	3.40637
666000	5.7	14.9	5.7	8.76667	5.31162
666500	7.1	8.4	7.1	7.53333	0.750555
667000	6.1	4.5	6.1	5.56667	0.92376
667500	5.7	9.3	5.7	6.9	2.07846
668000	12.4	10.4	12.4	11.7333	1.1547
668500	7.9	10.2	7.9	8.66667	1.32791
669000	4	7.5	4	5.16667	2.02073
669500	5.7	6.1	5.7	5.83333	0.23094
670000	2.6	17.8	2.6	7.66667	8.77572
670500	6.3	13.8	6.3	8.8	4.33013
671000	7.4	6.6	7.4	7.13333	0.46188
671500	7.4	4.2	7.4	6.33333	1.84752
672000	9.2	4.8	9.2	7.73333	2.54034
672500	7.2	14	7.2	9.46667	3.92598
673000	3.4	14.9	3.4	7.23333	6.63953
673500	5.2	7.1	5.2	5.83333	1.09697
674000	10.6	6.9	10.6	9.36667	2.1362
674500	9.6	6.8	9.6	8.66667	1.61658
675000	6.7	6.4	6.7	6.6	0.173205
675500	3.5	7.8	3.5	4.93333	2.48261
676000	3.6	14.2	3.6	7.13333	6.11991
676500	5.6	7.8	5.6	6.33333	1.27017
677000	4.3	4.4	4.3	4.33333	0.057735
677500	4.4	10.9	4.4	6.56667	3.75278
678000	5.7	14.7	5.7	8.7	5.19615
678500	9.2	6.8	9.2	8.4	1.38564
679000	7.8	10.7	7.8	8.76667	1.67432
679500	7.1	10	7.1	8.06667	1.67432
680000	4.4	10.9	5.9	7.06667	3.40343
680500	3.8	12.1	5.2	7.03333	4.44335
681000	10.9	11.4	10.9	11.0667	0.288675
681500	8.8	3.3	8.8	6.96667	3.17543
682000	7.4	7.4	7.4	7.4	1.08779e-15
682500	9.2	6.5	10.5	8.73333	2.04042
683000	6.4	9.5	6.5	7.46667	1.76163
683500	3.5	10.6	3.5	5.86667	4.09919
684000	1.3	7	1.3	3.2	3.2909
684500	2.4	18.8	2.4	7.86667	9.46854
685000	6.2	10.5	7.5	8.06667	2.2053
685500	5.5	10.6	5.5	7.2	2.94449
686000	6.5	12.7	6.5	8.56667	3.57957
686500	7.4	13.5	7.4	9.43333	3.52184
687000	9.1	11.4	9.1	9.86667	1.32791
687500	6.2	9.4	6.2	7.26667	1.84752
688000	6.4	7.5	7.5	7.13333	0.635085
688500	3.2	2.7	3.2	3.03333	0.288675
689000	10.4	11	10.4	10.6	0.34641
689500	2.8	8	2.8	4.53333	3.00222
690000	6.1	9.8	6.1	7.33333	2.1362
690500	8.7	15.9	8.7	11.1	4.15692
691000	7.6	12.4	7.6	9.2	2.77128
691500	5.2	8.8	5.2	6.4	2.07846
692000	8.7	6.6	8.7	8	1.21244
692500	7.3	11	7.3	8.53333	2.1362
693000	7.7	10.8	7.7	8.73333	1.78979
693500	5.1	10.4	5.1	6.86667	3.05996
694000	8.5	7.9	8.5	8.3	0.34641
694500	6.3	11.6	6.3	8.06667	3.05996
695000	8.2	7.9	8.2	8.1	0.173205
695500	7.9	9.1	9.5	8.83333	0.832666
696000	5.4	12.3	5.4	7.7	3.98372
696500	7.7	6.6	9.2	7.83333	1.30512
697000	12.4	5.9	12.4	10.2333	3.75278
697500	4.2	10.8	4.2	6.4	3.81051
698000	16.5	7.3	18.2	14	5.8643
698500	9.1	8.5	9.1	8.9	0.34641
699000	6	9.5	6	7.16667	2.02073
699500	12.9	7.4	12.9	11.0667	3.17543
700000	3.3	6.1	3.3	4.23333	1.61658
700500	3.5	5.2	3.5	4.06667	0.981495
701000	5.8	10.3	5.8	7.3	2.59808
701500	7.3	7.9	7.3	7.5	0.34641
702000	8	7.2	9.5	8.23333	1.16762
702500	4.6	10.5	4.6	6.56667	3.40637
703000	5	10.3	5	6.76667	3.05996
703500	8.7	6.7	8.7	8.03333	1.1547
704000	7.2	9.1	7.2	7.83333	1.09697
704500	12.3	6.4	14	10.9	3.98873
705000	11.1	6.7	11.1	9.63333	2.54034
705500	15.5	10.7	16.9	14.3667	3.25167
706000	14.7	8.8	18	13.8333	4.66083
706500	7	7.6	7	7.2	0.34641
707000	6.8	2.7	6.8	5.43333	2.36714
707500	11	3.9	11	8.63333	4.09919
708000	7.5	9.5	7.5	8.16667	1.1547
708500	6.3	3.5	6.3	5.36667	1.61658
709000	11	5.9	11	9.3	2.94449
709500	3.3	6.6	3.3	4.4	1.90526
710000	5.1	3.5	5.1	4.56667	0.92376
710500	9.9	9.5	9.9	9.76667	0.23094
711000	3.9	7.1	3.9	4.96667	1.84752
711500	4.4	7.4	4.4	5.4	1.73205
712000	1.5	8.9	1.5	3.96667	4.27239
712500	2.8	6.6	2.8	4.06667	2.19393
713000	5.1	2.1	5.1	4.1	1.73205
713500	5.8	3.1	5.8	4.9	1.55885
714000	5.2	5.5	5.2	5.3	0.173205
714500	1.5	4.9	1.5	2.63333	1.96299
715000	1.8	15.8	2.7	6.76667	7.83603
715500	1.6	12.8	3.2	5.86667	6.0575
716000	4.7	8.2	5.2	6.03333	1.89297
716500	9.3	7.9	9.3	8.83333	0.80829
717000	6.9	6.3	6.9	6.7	0.34641
717500	2.6	6.9	2.6	4.03333	2.48261
718000	7.4	7	7.4	7.26667	0.23094
718500	6.8	10.9	8.2	8.63333	2.08407
719000	11.3	3	11.3	8.53333	4.79201
719500	3.5	5.7	3.5	4.23333	1.27017
720000	6.8	8.6	6.8	7.4	1.03923
720500	4.7	6.8	4.7	5.4	1.21244
721000	6.1	13.1	6.1	8.43333	4.04145
721500	5.5	15.4	5.5	8.8	5.71577
722000	3	5	3	3.66667	1.1547
722500	5.4	5.6	5.4	5.46667	0.11547
723000	5.3	7.2	5.3	5.93333	1.09697
723500	4.4	7.9	4.4	5.56667	2.02073
724000	8.8	9	8.8	8.86667	0.11547
724500	7.6	11	7.6	8.73333	1.96299
725000	4.5	9.1	4.5	6.03333	2.65581
725500	5	9.2	5	6.4	2.42487
726000	3.4	5.7	3.4	4.16667	1.32791
726500	5.7	8.6	5.7	6.66667	1.67432
727000	6.4	13.2	6.4	8.66667	3.92598
727500	5	17.1	5	9.03333	6.98594
728000	4.1	12.2	4.1	6.8	4.67654
728500	2	12.3	2	5.43333	5.94671
729000	7.5	3.7	7.5	6.23333	2.19393
729500	2.8	5.5	2.8	3.7	1.55885
730000	5.7	3.8	5.7	5.06667	1.09697
730500	7	7.6	7	7.2	0.34641
731000	9.7	6.8	9.7	8.73333	1.67432
731500	10	8.7	10	9.56667	0.750555
732000	6.7	7.4	6.7	6.93333	0.404145
732500	1.9	5.8	1.9	3.2	2.25167
733000	4.1	7.6	4.1	5.26667	2.02073
733500	8	8.3	8	8.1	0.173205
734000	8.7	5.4	8.7	7.6	1.90526
734500	6.8	9	6.8	7.53333	1.27017
735000	7.7	9	11.5	9.4	1.93132
735500	1.5	5.1	3.1	3.23333	1.8037
736000	5.9	5	7.6	6.16667	1.32035
736500	6.5	13.8	6.5	8.93333	4.21466
737000	4.1	10.9	4.1	6.36667	3.92598
737500	5.5	9.3	5.5	6.76667	2.19393
738000	4.8	20.6	4.8	10.0667	9.12213
738500	5.6	10.4	5.6	7.2	2.77128
739000	7	11	7	8.33333	2.3094
739500	3.6	7.3	4.6	5.16667	1.91398
740000	2.1	9.4	2.3	4.6	4.15812
740500	2	11	2	5	5.19615
741000	5.8	5.8	5.8	5.8	0
741500	11.4	8.6	11.4	10.4667	1.61658
742000	10.4	7.5	10.4	9.43333	1.67432
742500	7.7	9	7.7	8.13333	0.750555
743000	7	8.3	7	7.43333	0.750555
743500	13.2	13.1	13.2	13.1667	0.057735
744000	9.2	13.7	9.2	10.7	2.59808
744500	5.4	7.9	5.4	6.23333	1.44338
745000	8.7	8.3	8.7	8.56667	0.23094
745500	6	8.4	6	6.8	1.38564
746000	2.4	9	2.4	4.6	3.81051
746500	5.1	4.1	5.1	4.76667	0.57735
747000	8.6	6.7	8.6	7.96667	1.09697
747500	2.3	13.5	2.3	6.03333	6.46632
748000	7.8	11.9	7.8	9.16667	2.36714
748500	4.6	9.9	4.6	6.36667	3.05996
749000	1.9	6.8	1.9	3.53333	2.82902
749500	3.2	10.8	3.2	5.73333	4.38786
750000	5.8	6.9	5.8	6.16667	0.635085
750500	4.1	7.1	5.5	5.56667	1.50111
751000	5.3	10.4	5.3	7	2.94449
751500	6.8	11.7	8.4	8.96667	2.49867
752000	5	3.3	5.2	4.5	1.04403
752500	7.4	6.1	7.4	6.96667	0.750555
753000	8.7	7.4	8.7	8.26667	0.750555
753500	7	6.1	7	6.7	0.519615
754000	7.4	11.7	7.4	8.83333	2.48261
754500	4.5	10.3	4.5	6.43333	3.34863
755000	5.3	11.5	5.3	7.36667	3.57957
755500	8.5	9.9	8.5	8.96667	0.80829
756000	7.8	5.2	9.3	7.43333	2.07445
756500	3.9	9.6	3.9	5.8	3.2909
757000	3.1	10.6	4.2	5.96667	4.0501
757500	6.5	8.3	6.5	7.1	1.03923
758000	10.7	9.2	10.7	10.2	0.866025
758500	8.5	11.1	8.5	9.36667	1.50111
759000	4.3	7.8	4.3	5.46667	2.02073
759500	3	16.2	3	7.4	7.62102
760000	8.5	10.3	8.5	9.1	1.03923
760500	3.7	7.4	3.7	4.93333	2.1362
761000	8.7	10.4	8.7	9.26667	0.981495
761500	6.1	8.5	6.1	6.9	1.38564
762000	4.5	5.3	4.5	4.76667	0.46188
762500	4.2	8.3	4.2	5.56667	2.36714
763000	2	9.7	2	4.56667	4.4456
763500	3.4	4.8	3.4	3.86667	0.80829
764000	13	3.9	13	9.96667	5.25389
764500	6.8	6.8	6.8	6.8	0
765000	7.7	6.1	7.7	7.16667	0.92376
765500	6.3	1.4	6.3	4.66667	2.82902
766000	2.6	7.4	2.6	4.2	2.77128
766500	3.9	7.2	3.9	5	1.90526
767000	5.8	5.3	5.8	5.63333	0.288675
767500	4.5	10.6	4.5	6.53333	3.52184
768000	4.4	9.9	4.4	6.23333	3.17543
768500	4.6	8	4.6	5.73333	1.96299
769000	6.1	6.2	6.1	6.13333	0.057735
769500	3	6.7	4.5	4.73333	1.861
770000	4.5	6.5	7.4	6.13333	1.48436
770500	15	5.7	16.6	12.4333	5.88586
771000	10.1	11.2	10.1	10.4667	0.635085
771500	3.3	9.5	3.3	5.36667	3.57957
772000	6.3	11.4	6.3	8	2.94449
772500	6.8	17.2	6.8	10.2667	6.00444
773000	5.6	15.1	5.6	8.76667	5.48483
773500	4.2	13.7	4.2	7.36667	5.48483
774000	5	10.2	5	6.73333	3.00222
774500	4.2	6.2	4.2	4.86667	1.1547
775000	4.7	9.1	4.7	6.16667	2.54034
775500	7.8	8	7.8	7.86667	0.11547
776000	10	8.7	10	9.56667	0.750555
776500	8.9	7.3	8.9	8.36667	0.92376
777000	8.5	7.5	8.5	8.16667	0.57735
777500	5.5	7.4	5.5	6.13333	1.09697
778000	6.4	6.8	6.4	6.53333	0.23094
778500	8.9	4.9	8.9	7.56667	2.3094
779000	10.6	7	11.5	9.7	2.38118
779500	8.2	10.7	9.9	9.6	1.27671
780000	8.8	10.6	8.8	9.4	1.03923
780500	5.6	9.4	5.6	6.86667	2.19393
781000	2.4	6.3	2.4	3.7	2.25167
781500	6.8	5.6	6.8	6.4	0.69282
782000	6.1	13.6	7.7	9.13333	3.95011
782500	6.8	11.5	6.8	8.36667	2.71355
783000	3.6	12.5	3.6	6.56667	5.13842
783500	5.3	14.8	5.3	8.46667	5.48483
784000	3.5	6.9	3.5	4.63333	1.96299
784500	10.5	11.7	12.2	11.4667	0.873689
785000	8.4	7.3	8.4	8.03333	0.635085
785500	6.9	4.1	6.9	5.96667	1.61658
786000	4.5	7.1	5.6	5.73333	1.30512
786500	5.6	10.6	5.6	7.26667	2.88675
787000	5.4	8.1	5.4	6.3	1.55885
787500	9.9	5.2	9.9	8.33333	2.71355
788000	7.5	6.4	7.5	7.13333	0.635085
788500	7.1	7.4	7.1	7.2	0.173205
789000	7.6	11.4	7.6	8.86667	2.19393
789500	5.5	5.6	5.5	5.53333	0.057735
790000	8.6	5.3	8.6	7.5	1.90526
790500	6.4	8.8	6.4	7.2	1.38564
791000	5.8	12.3	5.8	7.96667	3.75278
791500	3.1	7.5	3.1	4.56667	2.54034
792000	5.7	10.9	5.7	7.43333	3.00222
792500	11.8	7.3	11.8	10.3	2.59808
793000	4.6	4.9	4.6	4.7	0.173205
793500	4.6	11.1	4.6	6.76667	3.75278
794000	6.1	12.1	6.1	8.1	3.4641
794500	4.9	10.8	4.9	6.86667	3.40637
795000	13.6	6.2	13.6	11.1333	4.27239
795500	7	12.8	7	8.93333	3.34863
796000	4.5	3.9	4.5	4.3	0.34641
796500	6.4	6.1	6.4	6.3	0.173205
797000	2.9	5	2.9	3.6	1.21244
797500	5.4	5.4	5.4	5.4	1.08779e-15
798000	8.2	8.6	8.2	8.33333	0.23094
798500	11.8	5.6	11.8	9.73333	3.57957
799000	12.1	8.9	12.1	11.0333	1.84752
799500	8.6	4.7	8.6	7.3	2.25167
800000	7.6	6.4	8.6	7.53333	1.10151
800500	3.8	10.4	3.8	6	3.81051
801000	6.9	6.9	6.9	6.9	1.08779e-15
801500	4.6	5.8	4.6	5	0.69282
802000	10.1	5.6	10.1	8.6	2.59808
802500	10.1	6.9	10.1	9.03333	1.84752
803000	5.9	7.8	5.9	6.53333	1.09697
803500	4.1	7.5	4.1	5.23333	1.96299
804000	5.1	5.1	5.1	5.1	0
804500	5	12	5	7.33333	4.04145
805000	5.5	8	5.5	6.33333	1.44338
805500	5.4	8.2	5.4	6.33333	1.61658
806000	14.2	7.3	14.2	11.9	3.98372
806500	5.6	3.5	5.6	4.9	1.21244
807000	8.6	9.3	8.6	8.83333	0.404145
807500	6.3	7.5	6.3	6.7	0.69282
808000	3.3	9.6	4.4	5.76667	3.36502
808500	3.6	8.9	4	5.5	2.95127
809000	6.6	15.5	6.6	9.56667	5.13842
809500	4.7	11.3	4.7	6.9	3.81051
810000	12.3	8.9	14.1	11.7667	2.64071
810500	2.9	3.1	2.9	2.96667	0.11547
811000	9.9	5.7	9.9	8.5	2.42487
811500	10	6.9	10	8.96667	1.78979
812000	7.9	12.7	7.9	9.5	2.77128
812500	5.5	9	5.5	6.66667	2.02073
813000	7.2	10.2	8.6	8.66667	1.50111
813500	7.5	6.8	7.5	7.26667	0.404145
814000	9.1	10.7	9.1	9.63333	0.92376
814500	9	5.6	9	7.86667	1.96299
815000	6.3	7.1	6.3	6.56667	0.46188
815500	7.1	10.9	7.1	8.36667	2.19393
816000	6.1	7.8	6.1	6.66667	0.981495
816500	6.8	5	6.8	6.2	1.03923
817000	4.2	9.5	4.2	5.96667	3.05996
817500	6.8	10.1	6.8	7.9	1.90526
818000	9.4	8.3	10.9	9.53333	1.30512
818500	6.9	11.4	6.9	8.4	2.59808
819000	8	6.6	8	7.53333	0.80829
819500	6.4	13.7	6.4	8.83333	4.21466
820000	3.7	14.4	3.7	7.26667	6.17765
820500	14.7	11.6	14.7	13.6667	1.78979
821000	9.7	8.8	9.7	9.4	0.519615
821500	7.3	13.6	7.3	9.4	3.63731
822000	11.2	7.8	11.2	10.0667	1.96299
822500	5.6	10.6	5.6	7.26667	2.88675
823000	9.5	11.1	9.5	10.0333	0.92376
823500	11.1	5.7	11.1	9.3	3.11769
824000	5.7	4.2	5.7	5.2	0.866025
824500	3.5	8.3	3.5	5.1	2.77128
825000	3.1	12.6	3.1	6.26667	5.48483
825500	3.6	11.1	3.6	6.1	4.33013
826000	6.4	14.5	6.4	9.1	4.67654
826500	3.3	10.4	3.3	5.66667	4.09919
827000	3.8	7.7	3.8	5.1	2.25167
827500	9.6	9.5	9.6	9.56667	0.057735
828000	10.7	12.1	10.7	11.1667	0.80829
828500	9	14.7	9	10.9	3.2909
829000	5	12.6	5	7.53333	4.38786
829500	3.3	8.5	3.3	5.03333	3.00222
830000	5.1	7.5	5.1	5.9	1.38564
830500	6.4	14.7	6.4	9.16667	4.79201
831000	5.7	10.3	5.7	7.23333	2.65581
831500	6.2	10.4	6.2	7.6	2.42487
832000	4.4	4	4.4	4.26667	0.23094
832500	12.1	5.1	12.1	9.76667	4.04145
833000	7.9	4.8	7.9	6.86667	1.78979
833500	4.7	12.2	4.7	7.2	4.33013
834000	1.6	8.3	1.6	3.83333	3.86825
834500	2.7	8.7	2.7	4.7	3.4641
835000	4.8	5.6	4.8	5.06667	0.46188
835500	6.5	4.5	6.5	5.83333	1.1547
836000	9.3	11	9.3	9.86667	0.981495
836500	7.3	7.8	7.3	7.46667	0.288675
837000	8.6	5	8.6	7.4	2.07846
837500	5	6.5	5	5.5	0.866025
838000	8.4	9.4	8.4	8.73333	0.57735
838500	5.1	11.9	5.1	7.36667	3.92598
839000	11.9	12.7	11.9	12.1667	0.46188
839500	9.1	14.8	9.1	11	3.2909
840000	6.3	15.2	6.3	9.26667	5.13842
840500	6	14	6	8.66667	4.6188
841000	4.4	22.1	4.4	10.3	10.2191
841500	9.3	19	9.3	12.5333	5.6003
842000	4.9	14.2	4.9	8	5.36936
842500	7.2	12.2	7.2	8.86667	2.88675
843000	11.4	8.1	11.4	10.3	1.90526
843500	6	15.5	6	9.16667	5.48483
844000	5.6	16.5	5.6	9.23333	6.29312
844500	10.4	14.5	10.4	11.7667	2.36714
845000	7.2	14.9	7.2	9.76667	4.4456
845500	7.1	8.9	7.1	7.7	1.03923
846000	9.6	16.8	9.6	12	4.15692
846500	6.3	25.9	6.3	12.8333	11.3161
847000	2.1	10.7	2.1	4.96667	4.96521
847500	3.1	5.2	3.1	3.8	1.21244
848000	13	4.2	13	10.0667	5.08068
848500	9.6	2.4	9.6	7.2	4.15692
849000	8.7	1.2	8.7	6.2	4.33013
849500	7.3	2	7.3	5.53333	3.05996
850000	4.6	1.2	4.6	3.46667	1.96299
850500	5.1	1.4	5.1	3.86667	2.1362
851000	7	2.1	7	5.36667	2.82902
851500	3.4	1.6	3.4	2.8	1.03923
852000	2.6	1.2	2.6	2.13333	0.80829
852500	4.2	1.6	4.2	3.33333	1.50111
853000	4.5	0.7	4.7	3.3	2.25389
853500	2.4	0.7	3.6	2.23333	1.45717
854000	2.9	0.9	2.9	2.23333	1.1547
854500	1.5	1.3	1.5	1.43333	0.11547
855000	1.7	0.8	2.6	1.7	0.9
855500	7.2	0.6	10.6	6.13333	5.08462
856000	9.8	0.6	9.8	6.73333	5.31162
856500	10	0.9	10	6.96667	5.25389
857000	6.4	1	6.4	4.6	3.11769
857500	1.8	0.7	1.8	1.43333	0.635085
858000	2	0.7	2	1.56667	0.750555
858500	5.7	1.4	5.7	4.26667	2.48261
859000	7	1.6	7	5.2	3.11769
859500	10	1.8	10	7.26667	4.73427
860000	8	1.2	8	5.73333	3.92598
860500	5.5	1.5	5.5	4.16667	2.3094
861000	12.2	5.7	12.2	10.0333	3.75278
861500	9.8	1.5	9.8	7.03333	4.79201
862000	7.3	1.1	8.7	5.7	4.04475
862500	10.6	2.5	10.6	7.9	4.67654
863000	6.9	1.6	6.9	5.13333	3.05996
863500	6.3	2.9	6.3	5.16667	1.96299
864000	15.1	2.9	15.1	11.0333	7.04367
864500	4.1	1.1	4.1	3.1	1.73205
865000	6.9	0.2	6.9	4.66667	3.86825
865500	6.8	0.2	6.8	4.6	3.81051
866000	8.3	0.2	8.3	5.6	4.67654
866500	8.2	0.2	9.6	6	5.07149
867000	9.7	0.2	9.7	6.53333	5.48483
867500	9.3	0.2	9.3	6.26667	5.25389
868000	6.8	0.2	6.8	4.6	3.81051
868500	7	1.2	7	5.06667	3.34863
869000	8.9	16.9	8.9	11.5667	4.6188
869500	8.4	9.7	8.4	8.83333	0.750555
870000	7.7	9.1	7.7	8.16667	0.80829
870500	9.5	3.9	9.5	7.63333	3.23316
871000	11.5	2.3	11.5	8.43333	5.31162
871500	2.9	2	2.9	2.6	0.519615
872000	6.2	2.8	6.2	5.06667	1.96299
872500	4.4	6.1	4.4	4.96667	0.981495
873000	3.7	5.5	4.9	4.7	0.916515
873500	4.4	7.3	4.4	5.36667	1.67432
874000	3.7	7.5	3.7	4.96667	2.19393
874500	3	3	5.9	3.96667	1.67432
875000	1.3	3.1	2.7	2.36667	0.945163
875500	3.8	4.6	4.2	4.2	0.4
876000	12.9	1.3	12.9	9.03333	6.69726
876500	3.4	3.6	3.4	3.46667	0.11547
877000	1.5	7.3	1.5	3.43333	3.34863
877500	6.3	2.8	6.3	5.13333	2.02073
878000	5.3	6.5	5.3	5.7	0.69282
878500	4.1	11.8	4.9	6.93333	4.2336
879000	3.6	6.3	4.6	4.83333	1.36504
879500	7	3	7	5.66667	2.3094
880000	6	2.3	6	4.76667	2.1362
880500	5.3	7.6	5.3	6.06667	1.32791
881000	10.2	5.1	10.2	8.5	2.94449
881500	5.1	8.1	5.1	6.1	1.73205
882000	5.5	7.7	5.5	6.23333	1.27017
882500	3.6	6.7	3.6	4.63333	1.78979
883000	2.4	13.3	2.4	6.03333	6.29312
883500	5.5	13	5.5	8	4.33013
884000	6.7	5.4	6.7	6.26667	0.750555
884500	5.4	3.3	5.4	4.7	1.21244
885000	4.6	7.3	4.6	5.5	1.55885
885500	7	7.1	7	7.03333	0.057735
886000	10.1	11.2	10.1	10.4667	0.635085
886500	13	13.9	13	13.3	0.519615
887000	7.7	10.8	9	9.16667	1.55671
887500	5.5	7	5.5	6	0.866025
888000	2.5	10.5	2.5	5.16667	4.6188
888500	6.9	8	6.9	7.26667	0.635085
889000	12	11.1	12	11.7	0.519615
889500	6.5	10.5	6.5	7.83333	2.3094
890000	8	9.3	8	8.43333	0.750555
890500	5.9	10.5	5.9	7.43333	2.65581
891000	7.6	13.8	7.6	9.66667	3.57957
891500	3.3	5.9	3.3	4.16667	1.50111
892000	1.2	12.6	1.2	5	6.58179
892500	4.6	9.3	4.6	6.16667	2.71355
893000	7.7	9.6	9.2	8.83333	1.00167
893500	14.2	9.9	14.2	12.7667	2.48261
894000	7.5	13.1	8.3	9.63333	3.02875
894500	5.5	10.3	7.1	7.63333	2.44404
895000	1.2	4	1.4	2.2	1.56205
895500	3.1	5.8	3.9	4.26667	1.38684
896000	12.4	9.2	12.4	11.3333	1.84752
896500	11.8	5.6	11.8	9.73333	3.57957
897000	12.1	9.6	12.1	11.2667	1.44338
897500	10.9	11.7	10.9	11.1667	0.46188
898000	6.4	8.8	6.4	7.2	1.38564
898500	10.3	14.3	10.3	11.6333	2.3094
899000	9	13.8	9	10.6	2.77128
899500	3.3	7.7	3.3	4.76667	2.54034
900000	5.8	5.6	5.8	5.73333	0.11547
900500	8.1	5.6	8.1	7.26667	1.44338
901000	10	5.3	10	8.43333	2.71355
901500	5.7	4.3	5.7	5.23333	0.80829
902000	1.3	4.6	1.3	2.4	1.90526
902500	4.4	6.7	4.4	5.16667	1.32791
903000	7.5	1.3	7.5	5.43333	3.57957
903500	6.5	5.8	6.5	6.26667	0.404145
904000	4.2	9.6	4.2	6	3.11769
904500	3.2	7.1	3.2	4.5	2.25167
905000	4.8	6.9	4.8	5.5	1.21244
905500	6.9	6.9	6.9	6.9	1.08779e-15
906000	7.5	3.2	7.5	6.06667	2.48261
906500	6.8	4.2	6.8	5.93333	1.50111
907000	13	9.5	13	11.8333	2.02073
907500	8.9	14.5	8.9	10.7667	3.23316
908000	6.8	11.9	6.8	8.5	2.94449
908500	5.6	9.6	5.6	6.93333	2.3094
909000	5.9	9.3	5.9	7.03333	1.96299
909500	7.2	13.8	8.6	9.86667	3.47755
910000	3.2	15.6	3.2	7.33333	7.15914
910500	6.5	14.3	6.5	9.1	4.50333
911000	9.8	10.7	9.8	10.1	0.519615
911500	3.5	6.8	3.5	4.6	1.90526
912000	8.5	7.2	8.5	8.06667	0.750555
912500	6.7	7.2	6.7	6.86667	0.288675
913000	7.1	5.4	7.1	6.53333	0.981495
913500	11.1	5.4	11.1	9.2	3.2909
914000	6.3	7.8	6.3	6.8	0.866025
914500	4.4	12.7	4.4	7.16667	4.79201
915000	2.9	6.2	3.2	4.1	1.82483
915500	3.8	13.1	5.7	7.53333	4.91359
916000	2.8	9.3	2.8	4.96667	3.75278
916500	8.4	8.3	9.3	8.66667	0.550757
917000	11.2	9.8	11.2	10.7333	0.80829
917500	6	9.1	6	7.03333	1.78979
918000	4.2	8	4.2	5.46667	2.19393
918500	6.5	6.9	6.5	6.63333	0.23094
919000	4.7	9.4	4.7	6.26667	2.71355
919500	5.3	5.1	5.3	5.23333	0.11547
920000	2.4	8.1	2.4	4.3	3.2909
920500	4.4	3.4	4.4	4.06667	0.57735
921000	8.2	13.3	8.2	9.9	2.94449
921500	12	4.9	12	9.63333	4.09919
922000	3.4	1.8	3.4	2.86667	0.92376
922500	5.1	5.7	5.1	5.3	0.34641
923000	6.7	12.2	6.7	8.53333	3.17543
923500	3.8	10.1	3.8	5.9	3.63731
924000	4.6	6	4.6	5.06667	0.80829
924500	11.7	8.9	11.7	10.7667	1.61658
925000	8.8	10.5	8.8	9.36667	0.981495
925500	8.7	9.6	8.7	9	0.519615
926000	5.7	7.1	5.7	6.16667	0.80829
926500	5.9	8.8	5.9	6.86667	1.67432
927000	4.8	11.8	4.8	7.13333	4.04145
927500	3.8	7.9	3.8	5.16667	2.36714
928000	8.3	7.1	8.3	7.9	0.69282
928500	4.3	10.5	4.3	6.36667	3.57957
929000	8.5	5.7	8.5	7.56667	1.61658
929500	5	8.3	5	6.1	1.90526
930000	5.2	7.1	5.2	5.83333	1.09697
930500	4.9	10.6	4.9	6.8	3.2909
931000	5.5	11.5	5.5	7.5	3.4641
931500	7.4	12.7	7.4	9.16667	3.05996
932000	2.3	4.9	2.3	3.16667	1.50111
932500	2.6	4.4	2.6	3.2	1.03923
933000	6	8.7	6	6.9	1.55885
933500	8.7	12.1	8.7	9.83333	1.96299
934000	8.1	15.8	8.1	10.6667	4.4456
934500	17.5	10.3	17.5	15.1	4.15692
935000	6.3	8.1	6.3	6.9	1.03923
935500	5.7	7.5	5.7	6.3	1.03923
936000	11.4	5.8	11.4	9.53333	3.23316
936500	3.9	7.5	3.9	5.1	2.07846
937000	4.4	11.9	4.4	6.9	4.33013
937500	3.2	7.2	3.2	4.53333	2.3094
938000	11.2	3.7	11.2	8.7	4.33013
938500	3.2	12	3.2	6.13333	5.08068
939000	4.2	11.1	4.2	6.5	3.98372
939500	9.5	9.1	11.4	10	1.22882
940000	10.3	10.6	10.3	10.4	0.173205
940500	10.1	11.3	10.1	10.5	0.69282
941000	8.6	7.9	8.6	8.36667	0.404145
941500	6.8	10.8	6.8	8.13333	2.3094
942000	5.2	9	5.2	6.46667	2.19393
942500	6	5.9	6	5.96667	0.057735
943000	3.2	10.3	3.2	5.56667	4.09919
943500	8.7	9.8	10.4	9.63333	0.862168
944000	6.9	17.5	8	10.8	5.82838
944500	5.7	13.2	6.5	8.46667	4.11866
945000	1.8	7.2	1.8	3.6	3.11769
945500	6.1	7	6.2	6.43333	0.493288
946000	4.1	6.7	5.1	5.3	1.31149
946500	2.7	6.8	2.7	4.06667	2.36714
947000	8.5	7.5	8.5	8.16667	0.57735
947500	4	12.3	4	6.76667	4.79201
948000	13.5	7.1	13.5	11.3667	3.69504
948500	9.4	8.6	9.4	9.13333	0.46188
949000	5.8	9.2	5.8	6.93333	1.96299
949500	6.1	12.9	6.1	8.36667	3.92598
950000	4.2	13	4.2	7.13333	5.08068
950500	6.4	13.2	6.4	8.66667	3.92598
951000	8.9	15.3	8.9	11.0333	3.69504
951500	5.9	13.1	5.9	8.3	4.15692
952000	4.9	7.8	4.9	5.86667	1.67432
952500	5.4	6.9	5.4	5.9	0.866025
953000	7.8	12.5	7.8	9.36667	2.71355
953500	7.1	8.2	7.1	7.46667	0.635085
954000	4.2	11.8	4.3	6.76667	4.35928
954500	10.2	14.8	11.9	12.3	2.32594
955000	11.7	5.2	11.7	9.53333	3.75278
955500	7.7	5.7	7.7	7.03333	1.1547
956000	7.5	7.6	7.5	7.53333	0.057735
956500	3.2	6.4	3.2	4.26667	1.84752
957000	4.2	7.9	4.2	5.43333	2.1362
957500	9.7	12.7	9.7	10.7	1.73205
958000	8.9	7.6	8.9	8.46667	0.750555
958500	4.6	12.4	4.6	7.2	4.50333
959000	2.9	15.6	2.9	7.13333	7.33235
959500	4.6	12.3	4.6	7.16667	4.4456
960000	17	13.8	17	15.9333	1.84752
960500	6.3	8.1	6.3	6.9	1.03923
961000	5.6	8.7	5.6	6.63333	1.78979
961500	8.1	9.2	8.1	8.46667	0.635085
962000	3.5	12.3	3.5	6.43333	5.08068
962500	6	11	6	7.66667	2.88675
963000	7.8	9.4	7.8	8.33333	0.92376
963500	9.1	9.5	9.1	9.23333	0.23094
964000	6	9.8	6	7.26667	2.19393
964500	4.4	15.2	4.4	8	6.23538
965000	11	14.2	11	12.0667	1.84752
965500	10.6	9	10.6	10.0667	0.92376
966000	7.2	5.8	7.2	6.73333	0.80829
966500	7.5	10.5	7.5	8.5	1.73205
967000	7.8	9.9	7.8	8.5	1.21244
967500	7	9.4	7	7.8	1.38564
968000	10.5	10.7	10.5	10.5667	0.11547
968500	7.2	6.7	7.2	7.03333	0.288675
969000	5.9	7.4	5.9	6.4	0.866025
969500	4.3	11.5	5.8	7.2	3.79868
970000	10.2	9.7	10.2	10.0333	0.288675
970500	6.6	6.8	6.6	6.66667	0.11547
971000	5.2	8.7	5.2	6.36667	2.02073
971500	6.7	5.7	6.7	6.36667	0.57735
972000	7.6	12.7	7.6	9.3	2.94449
972500	6.3	11	6.3	7.86667	2.71355
973000	5.6	10.1	5.6	7.1	2.59808
973500	6.3	12	6.3	8.2	3.2909
974000	8.1	10.5	8.1	8.9	1.38564
974500	8.4	8.3	8.4	8.36667	0.057735
975000	14.6	10.3	14.6	13.1667	2.48261
975500	14.2	11	14.2	13.1333	1.84752
976000	12.7	13.2	12.7	12.8667	0.288675
976500	10.3	10.3	10.3	10.3	0
977000	10.5	9.4	10.5	10.1333	0.635085
977500	3.5	15.2	3.5	7.4	6.755
978000	9.4	7.2	9.4	8.66667	1.27017
978500	7.7	9.5	8.1	8.43333	0.945163
979000	7.5	8.7	8.8	8.33333	0.723418
979500	8.8	7.8	8.8	8.46667	0.57735
980000	14.4	10.4	14.4	13.0667	2.3094
980500	7.4	10.8	7.4	8.53333	1.96299
981000	7.5	6.4	7.5	7.13333	0.635085
981500	10	6.6	10	8.86667	1.96299
982000	5.5	8.7	5.5	6.56667	1.84752
982500	5.4	10.5	5.4	7.1	2.94449
983000	4.7	10.9	4.7	6.76667	3.57957
983500	4.9	11.1	6.1	7.36667	3.28836
984000	6.9	17.2	6.9	10.3333	5.94671
984500	9.4	12.9	11.3	11.2	1.75214
985000	9.6	8.4	9.6	9.2	0.69282
985500	4.3	14	4.3	7.53333	5.6003
986000	3.5	14.7	3.5	7.23333	6.46632
986500	7.5	11.7	7.5	8.9	2.42487
987000	5.6	12.5	5.6	7.9	3.98372
987500	6.1	6.5	6.1	6.23333	0.23094
988000	11.4	6.3	11.4	9.7	2.94449
988500	7.3	11.2	7.3	8.6	2.25167
989000	4.5	5.9	4.5	4.96667	0.80829
989500	1.8	9.5	1.8	4.36667	4.4456
990000	2.6	4.2	2.6	3.13333	0.92376
990500	4.9	6.1	4.9	5.3	0.69282
991000	12.7	13.3	12.7	12.9	0.34641
991500	13	7.7	13	11.2333	3.05996
992000	6.6	10.8	6.6	8	2.42487
992500	9	7.8	9	8.6	0.69282
993000	10.3	9.4	10.3	10	0.519615
993500	5.1	9	5.1	6.4	2.25167
994000	6.5	8.2	6.5	7.06667	0.981495
994500	8.4	4.6	8.4	7.13333	2.19393
995000	7.3	7.4	7.3	7.33333	0.057735
995500	6.6	5.6	6.6	6.26667	0.57735
996000	15.3	12.2	15.3	14.2667	1.78979
996500	6.3	4.6	6.6	5.83333	1.07858
997000	4.3	5.5	5.4	5.06667	0.665833
997500	4.3	7.2	4.3	5.26667	1.67432
998000	6.9	5	6.9	6.26667	1.09697
998500	3.3	8.5	3.3	5.03333	3.00222
999000	1.4	9.2	1.4	4	4.50333
999500	3.8	6.4	3.8	4.66667	1.50111
1000000	13.9	6.1	13.9	11.3	4.50333
1000500	7	16.7	7	10.2333	5.6003
1001000	6.5	14.6	6.5	9.2	4.67654
1001500	10.9	7.6	10.9	9.8	1.90526
1002000	7.8	8.5	8.4	8.23333	0.378594
1002500	5.6	13.4	6.7	8.56667	4.22177

## Sheet: 4-ethylguaiacol-pb1B
	GC-SSR responses to 4-ethylguaiacol
T[ms]	F[Hz]	F[Hz]	F[Hz]	Average	SD
150000	16.6	30.1	19.9	22.2	7.03776
150500	14.5	30.1	18.9	21.1667	8.04322
151000	13.4	22.9	15.3	17.2	5.02693
151500	14.4	30.2	18	20.8667	8.2809
152000	10.3	22.3	15.5	16.0333	6.01775
152500	8.7	24.9	17	16.8667	8.10082
153000	12.1	24.2	19	18.4333	6.06987
153500	18.3	38.5	32.9	29.9	10.4288
154000	17.1	24.7	20.9	20.9	3.8
154500	14.3	25.6	15.6	18.5	6.18304
155000	18.4	31.3	28.5	26.0667	6.78552
155500	18.4	32.2	21.5	24.0333	7.2404
156000	15.3	28.5	17	20.2667	7.18076
156500	18.3	27.5	22	22.6	4.62925
157000	26	41.2	32.6	33.2667	7.6219
157500	16.4	34.6	21.8	24.2667	9.34737
158000	15.6	37.7	19.6	24.3	11.7758
158500	12.2	27.6	17.5	19.1	7.82368
159000	12.2	29.2	14.2	18.5333	9.29157
159500	23.1	46.9	30.1	33.3667	12.2317
160000	15.2	38	28.5	27.2333	11.4527
160500	13.2	26.1	19.2	19.5	6.45523
161000	15.6	27.8	24.5	22.6333	6.31057
161500	11.9	25.8	18.1	18.6	6.96348
162000	14.2	31.8	16.3	20.7667	9.61267
162500	13.4	18.5	16.7	16.2	2.5865
163000	16.4	30.3	25.1	23.9333	7.02306
163500	14.7	19.7	14.7	16.3667	2.88675
164000	12	25	20.6	19.2	6.61211
164500	21.8	37.9	26.9	28.8667	8.2282
165000	18.9	29.2	22.7	23.6	5.20865
165500	12.6	25.1	14.4	17.3667	6.75747
166000	12.8	29.3	15.1	19.0667	8.93663
166500	9.7	23.3	11.6	14.8667	7.36501
167000	15.4	28.6	23.1	22.3667	6.63049
167500	11.3	40.3	18.4	23.3333	15.1163
168000	13.6	30	17	20.2	8.65563
168500	25.9	27.8	27.8	27.1667	1.09697
169000	14.2	32.7	18.8	21.9	9.63172
169500	16.3	29.9	18.1	21.4333	7.38738
170000	22.4	24.1	24.1	23.5333	0.981495
170500	10.5	27.1	17.5	18.3667	8.33387
171000	16.7	30.8	21.7	23.0667	7.14866
171500	8.6	17.1	17.1	14.2667	4.90748
172000	5.7	11.4	9.5	8.86667	2.9023
172500	16.1	26.8	17.9	20.2667	5.72917
173000	10.8	16.8	15.5	14.3667	3.15647
173500	19.6	27.9	24.6	24.0333	4.17892
174000	18.8	28.2	20.6	22.5333	4.98932
174500	7.8	21.8	18.7	16.1	7.35323
175000	9.8	19.7	16.4	15.3	5.04083
175500	16.2	22.7	19.5	19.4667	3.25013
176000	12.7	21.4	12.7	15.6	5.02295
176500	24.8	34.4	28.6	29.2667	4.8346
177000	19.8	32.1	25.3	25.7333	6.16144
177500	11.5	17.8	12.8	14.0333	3.32616
178000	7.8	20.2	12.9	13.6333	6.23244
178500	16.9	32.5	30.5	26.6333	8.48842
179000	24.8	30.6	28.7	28.0333	2.95691
179500	24.3	40.7	32.9	32.6333	8.20325
180000	14.3	25.6	18.2	19.3667	5.73963
180500	26.7	39.1	30.2	32	6.39296
181000	14.8	33	23.2	23.6667	9.10897
181500	21.6	40.5	28.8	30.3	9.53887
182000	19	27.5	24.6	23.7	4.32088
182500	16.8	26.1	16.8	19.9	5.36936
183000	19	34.8	27	26.9333	7.90021
183500	10.2	25.1	15.7	17	7.53459
184000	13	21.2	16.3	16.8333	4.12593
184500	12.6	21.6	16.2	16.8	4.5299
185000	25.9	29.3	25.9	27.0333	1.96299
185500	17.1	26.5	17.1	20.2333	5.42709
186000	19.9	31.3	21.6	24.2667	6.15007
186500	19.6	30.3	23.1	24.3333	5.45558
187000	8.6	27.3	18.4	18.1	9.35361
187500	12.1	20.8	17.3	16.7333	4.37759
188000	17.8	31.6	23.8	24.4	6.91954
188500	10.8	23.5	18.1	17.4667	6.37364
189000	19.2	30	28	25.7333	5.74572
189500	15	27.3	16.4	19.5667	6.73375
190000	17.6	20.8	19.2	19.2	1.6
190500	19.9	29.9	26.1	25.3	5.04777
191000	17	29.7	20.8	22.5	6.51844
191500	13.5	31.6	21.8	22.3	9.06035
192000	16.9	26.9	22.5	22.1	5.01199
192500	10.9	32.9	20	21.2667	11.0546
193000	16.9	28.7	18.8	21.4667	6.33588
193500	12.2	21.9	18.3	17.4667	4.9034
194000	9.9	24.8	9.9	14.8667	8.60252
194500	15	30	20.6	21.8667	7.5798
195000	21.6	33	24.8	26.4667	5.87991
195500	21.1	37.5	27.6	28.7333	8.25853
196000	21	29.2	24.4	24.8667	4.11987
196500	9.6	24.9	9.6	14.7	8.83346
197000	16.4	23	19.8	19.7333	3.30051
197500	19	33	23.4	25.1333	7.15914
198000	13.8	27	13.8	18.2	7.62102
198500	18.9	29.9	26.7	25.1667	5.65803
199000	12	25	17.3	18.1	6.53682
199500	18	34.8	25.2	26	8.42852
200000	16.9	31.2	25.4	24.5	7.19236
200500	10.1	25	17.8	17.6333	7.4514
201000	10.4	31.9	15.6	19.3	11.2174
201500	12.5	23.3	14.3	16.7	5.78619
202000	18.8	20.7	18.8	19.4333	1.09697
202500	21.4	28.5	23.1	24.3333	3.7072
203000	15	24.2	16.5	18.5667	4.93592
203500	7.7	12.7	10.8	10.4	2.52389
204000	15.4	24.6	26.2	22.0667	5.82866
204500	11.8	13.5	13.6	12.9667	1.0116
205000	6.9	7.8	8.3	7.66667	0.70946
205500	16.5	16.5	18	17	0.866025
206000	19.2	21.1	21.1	20.4667	1.09697
206500	13.8	13.8	15.9	14.5	1.21244
207000	6.7	6.7	13.9	9.1	4.15692
207500	12.8	12.8	18.7	14.7667	3.40637
208000	13.3	13.3	15.2	13.9333	1.09697
208500	7.8	7.8	14	9.86667	3.57957
209000	10.1	11.7	11.7	11.1667	0.92376
209500	6.5	9.1	10.6	8.73333	2.07445
210000	5.6	9	5.6	6.73333	1.96299
210500	6.8	12.7	9	9.5	2.98161
211000	11.4	18.6	13	14.3333	3.78065
211500	2.2	7.3	4.9	4.8	2.55147
212000	4.5	10.5	8.6	7.86667	3.06649
212500	4.9	11.5	6.6	7.66667	3.42685
213000	3.6	5.8	3.6	4.33333	1.27017
213500	6.6	8.8	6.6	7.33333	1.27017
214000	6.3	14.1	6.3	8.9	4.50333
214500	7.6	11.5	7.6	8.9	2.25167
215000	5.7	10.2	5.7	7.2	2.59808
215500	6.3	12.7	6.7	8.56667	3.58515
216000	6	19.9	9.1	11.6667	7.2968
216500	13.3	31.2	17.3	20.6	9.39521
217000	3.5	7.1	3.5	4.7	2.07846
217500	3.6	9.9	4.8	6.1	3.34515
218000	12.3	20	13.9	15.4	4.06325
218500	7.2	18	9	11.4	5.78619
219000	7.2	28.7	10.8	15.5667	11.5154
219500	10.2	21.3	12.2	14.5667	5.91636
220000	7.4	16.8	10.4	11.5333	4.80139
220500	8.7	27	11.5	15.7333	9.85715
221000	5.2	17.2	6.9	9.76667	6.49333
221500	6.4	13.4	8	9.26667	3.66788
222000	3.1	11	4.7	6.26667	4.17652
222500	6.6	26.5	12.5	15.2	10.2211
223000	6.7	20.3	7.8	11.6	7.55447
223500	8	20.1	9.6	12.5667	6.57292
224000	7.5	19.2	9.1	11.9333	6.34376
224500	13.6	29.4	18.1	20.3667	8.14023
225000	13.8	26	16.9	18.9	6.34114
225500	13.2	25	15.4	17.8667	6.27482
226000	11.4	27.5	17.9	18.9333	8.09959
226500	10.6	25.1	11.2	15.6333	8.20386
227000	12.4	30.8	13.8	19	10.243
227500	15	34.1	18.3	22.4667	10.209
228000	8.4	19.4	12.6	13.4667	5.55098
228500	11.4	32.3	19	20.9	10.5788
229000	13.2	25.1	15.1	17.8	6.39296
229500	13.9	29.6	15.6	19.7	8.61568
230000	7.4	30.8	12.6	16.9333	12.2871
230500	5.3	18.1	8.9	10.7667	6.60101
231000	19.6	28.2	22.9	23.5667	4.33859
231500	9.7	24.7	11.3	15.2333	8.23731
232000	9.2	30.3	12.3	17.2667	11.3931
232500	16.7	31.5	18.5	22.2333	8.07548
233000	18.3	27.4	20.1	21.9333	4.81906
233500	6.2	24.6	10.9	13.9	9.55981
234000	2.8	13.9	5.2	7.3	5.84038
234500	8	21.8	9.2	13	7.64461
235000	7	21.1	7	11.7	8.14064
235500	9	20.5	13.1	14.2	5.82838
236000	12.5	25.4	18.1	18.6667	6.46864
236500	12.9	27.7	20.3	20.3	7.4
237000	13.7	26	19.1	19.6	6.16523
237500	5.1	30.5	8.5	14.7	13.7884
238000	11.8	23.6	16.2	17.2	5.96322
238500	12.2	27	19.4	19.5333	7.4009
239000	17.2	29.9	25	24.0333	6.40495
239500	8.5	22	11.9	14.1333	7.02163
240000	7.4	31.5	14.4	17.7667	12.3977
240500	13.2	21.9	16.1	17.0667	4.42982
241000	12.7	25.5	23.7	20.6333	6.92917
241500	14.6	27.9	20.1	20.8667	6.68306
242000	17.5	24.8	23.3	21.8667	3.8553
242500	15.7	25.6	17.7	19.6667	5.23482
243000	7.2	21.4	21.4	16.6667	8.19837
243500	16.2	26.1	24.3	22.2	5.27352
244000	14.3	19.7	17.9	17.3	2.74955
244500	8.9	17.9	13	13.2667	4.50592
245000	9.6	19	16.1	14.9	4.81352
245500	14.7	25.5	17	19.0667	5.68888
246000	11.7	29.9	16.1	19.2333	9.49596
246500	24.9	30.6	28.7	28.0667	2.9023
247000	13.3	23.5	17.6	18.1333	5.12087
247500	13.4	21.8	18.4	17.8667	4.22532
248000	14.2	20.6	17.4	17.4	3.2
248500	13.4	24.6	17	18.3333	5.71781
249000	18.6	28.8	20.1	22.5	5.50727
249500	11.2	23.1	14.4	16.2333	6.15819
250000	13.2	27.9	19	20.0333	7.40428
250500	18.1	28.9	25.3	24.1	5.49909
251000	10.5	14.9	11.1	12.1667	2.38607
251500	26.9	38.6	28.6	31.3667	6.32166
252000	17.5	29.4	25.8	24.2333	6.10273
252500	9.2	22.1	12.9	14.7333	6.64254
253000	11.6	24.6	15	17.0667	6.74191
253500	10.2	16.9	15.1	14.0667	3.46747
254000	16.8	26.1	18.6	20.5	4.93254
254500	10.2	30.6	17	19.2667	10.3872
255000	11.8	29.8	19.3	20.3	9.04157
255500	12.6	25	20.5	19.3667	6.27721
256000	7	24.4	16.3	15.9	8.70689
256500	8.2	16.2	12.9	12.4333	4.02036
257000	16.5	24.8	18.2	19.8333	4.38444
257500	12	20.6	15.4	16	4.33128
258000	12.5	21	15.3	16.2667	4.33167
258500	17.6	26	20.8	21.4667	4.2395
259000	6.3	23.2	14.8	14.7667	8.45005
259500	10.7	17.5	13.6	13.9333	3.41223
260000	16	31.8	22.4	23.4	7.94733
260500	9.9	29.3	18.3	19.1667	9.72899
261000	13.3	27.2	18.3	19.6	7.0406
261500	13.5	22.9	16.9	17.7667	4.75955
262000	10.6	23.9	16.6	17.0333	6.66058
262500	12.6	18.9	17.3	16.2667	3.27465
263000	15.5	29	17.4	20.6333	7.30776
263500	20.4	30.7	22.1	24.4	5.52178
264000	11.2	25.1	18.7	18.3333	6.95725
264500	17.9	17.9	17.9	17.9	0
265000	18.6	22.3	18.6	19.8333	2.1362
265500	14.7	31.2	16.4	20.7667	9.07542
266000	13.4	19.4	15.1	15.9667	3.09246
266500	15.1	25.8	16.6	19.1667	5.79339
267000	11.8	29.7	21.7	21.0667	8.96679
267500	13.1	25.9	17.3	18.7667	6.52482
268000	12	17.6	15	14.8667	2.80238
268500	12.6	15.8	15.8	14.7333	1.84752
269000	20.4	40.8	25.9	29.0333	10.5548
269500	12.6	23.4	14.4	16.8	5.78619
270000	12.6	31.1	19.9	21.2	9.31826
270500	9.9	22.2	15.7	15.9333	6.15332
271000	15	20	16.7	17.2333	2.54231
271500	19	29.4	25.9	24.7667	5.29182
272000	11.9	23.9	19.9	18.5667	6.1101
272500	16.3	30.4	25.6	24.1	7.16868
273000	14.6	29.2	16.4	20.0667	7.96074
273500	14.2	23.1	14.2	17.1667	5.13842
274000	15.6	21.8	17.2	18.2	3.2187
274500	9.8	21.1	12.8	14.5667	5.85349
275000	10.1	20.2	11.5	13.9333	5.47205
275500	26.4	30.7	28.2	28.4333	2.15948
276000	13.8	23.3	21.3	19.4667	5.00833
276500	15.6	28.7	18.4	20.9	6.89855
277000	13.2	23.5	18.2	18.3	5.15073
277500	17.7	29.5	19.6	22.2667	6.33588
278000	12.7	27.2	19.9	19.9333	7.25006
278500	13.6	24.6	16.7	18.3	5.67186
279000	11	25.8	18.4	18.4	7.4
279500	12.9	29.9	16.9	19.9	8.88819
280000	12.8	31	20	21.2667	9.16588
280500	12.5	25	14.3	17.2667	6.75747
281000	9.3	19.2	10.9	13.1333	5.31445
281500	14	24.7	15.4	18.0333	5.81578
282000	12.3	22.4	16.4	17.0333	5.0797
282500	15.9	24.8	19.5	20.0667	4.47698
283000	20	31.3	21.6	24.3	6.11474
283500	7.1	12.7	9.9	9.9	2.8
284000	13.1	23.9	17.5	18.1667	5.43078
284500	13.5	23	19.5	18.6667	4.80451
285000	14.4	34.8	22	23.7333	10.3099
285500	17.6	30.8	26.1	24.8333	6.69054
286000	12.3	25	22.1	19.8	6.65507
286500	8.9	15	15	12.9667	3.52184
287000	12.7	20.8	17.6	17.0333	4.07962
287500	12.8	29.9	15.9	19.5333	9.11062
288000	19.4	23.3	21.4	21.3667	1.95021
288500	15.6	23.5	21.5	20.2	4.10731
289000	21.8	31	29.2	27.3333	4.87579
289500	11.2	17.3	12.1	13.5333	3.29292
290000	16.1	27.5	24.2	22.6	5.866
290500	16.4	23.1	19.8	19.7667	3.35012
291000	8	19	9.6	12.2	5.94306
291500	11.1	21.6	15.9	16.2	5.25642
292000	23.8	33.9	27.8	28.5	5.08626
292500	10.5	28.5	21.5	20.1667	9.07377
293000	15	30	23.3	22.7667	7.51421
293500	7.7	17.5	15.7	13.6333	5.21664
294000	14.7	26.2	19.4	20.1	5.78187
294500	11.2	25.6	13.5	16.7667	7.73585
295000	12.7	26.3	15.9	18.3	7.11056
295500	12.2	17.5	14	14.5667	2.69506
296000	11.8	27	15.2	18	7.97747
296500	15.4	31.4	22.3	23.0333	8.02517
297000	20.2	39.5	28.7	29.4667	9.67281
297500	13	20.4	18.6	17.3333	3.85919
298000	17.1	31.6	20.8	23.1667	7.53414
298500	7.2	28.4	12.6	16.0667	11.017
299000	14.8	33.3	19.2	22.4333	9.66454
299500	14.6	20.2	18.3	17.7	2.84781
300000	17	30	27.5	24.8333	6.89807
300500	11	34.5	19.1	21.5333	11.9375
301000	10.9	14.5	12.7	12.7	1.8
301500	20.2	31.4	27.1	26.2333	5.65007
302000	19.2	43.1	31.3	31.2	11.9503
302500	12.5	28.7	23.3	21.5	8.24864
303000	10.9	20.4	15.6	15.6333	4.75009
303500	10	20	13.3	14.4333	5.09542
304000	13	24.5	16.2	17.9	5.93549
304500	22.4	33.7	28	28.0333	5.65007
305000	15.6	27.3	21.5	21.4667	5.85007
305500	17	33.2	27.3	25.8333	8.19898
306000	13.5	28	22.8	21.4333	7.34597
306500	20.8	44.6	33.2	32.8667	11.9035
307000	17.4	29	20.6	22.3333	5.9911
307500	10	33.6	14.2	19.2667	12.5894
308000	12.6	33.2	19.2	21.6667	10.5192
308500	11.1	21.1	12.7	14.9667	5.37153
309000	13.1	26.7	17.5	19.1	6.93974
309500	15	28.2	22.5	21.9	6.62042
310000	8	12.5	9.9	10.1333	2.25906
310500	7.3	32.9	14.9	18.3667	13.1474
311000	10.3	25.9	22.2	19.4667	8.15128
311500	12.3	32.2	26.5	23.6667	10.2481
312000	17.5	38	24.7	26.7333	10.4002
312500	9.6	16.5	12.8	12.9667	3.45302
313000	18.7	26.2	20.6	21.8333	3.89915
313500	18.4	27.9	23.1	23.1333	4.75009
314000	11.4	32.6	17.9	20.6333	10.8611
314500	14.6	20	18.2	17.6	2.74955
315000	19.1	30.6	22.9	24.2	5.85918
315500	12.9	21.6	18.7	17.7333	4.42982
316000	16.5	28.9	20.4	21.9333	6.34061
316500	11	24.2	16.5	17.2333	6.63049
317000	17	30.8	17	21.6	7.96743
317500	15	30	22.5	22.5	7.5
318000	13.6	23.4	15.6	17.5333	5.17816
318500	21.7	42.9	32.6	32.4	10.6014
319000	15.6	27.9	23.4	22.3	6.22334
319500	9.2	19.1	12.9	13.7333	5.00233
320000	7	19.2	12.2	12.8	6.12209
320500	20.6	22.5	20.6	21.2333	1.09697
321000	11.6	31.1	20.7	21.1333	9.75722
321500	9.4	24.5	15.7	16.5333	7.58441
322000	18.8	28.6	22.7	23.3667	4.9339
322500	9.6	25	17.3	17.3	7.7
323000	10.3	26.3	18.9	18.5	8.0075
323500	12.3	17.5	12.3	14.0333	3.00222
324000	9.7	14.1	10.9	11.5667	2.2745
324500	14.8	23.6	20.4	19.6	4.45421
325000	16	32.7	20.8	23.1667	8.59787
325500	20.7	32.1	28.3	27.0333	5.8046
326000	18.1	37	24.9	26.6667	9.57305
326500	7.6	22.8	13.3	14.5667	7.67876
327000	11.2	26.3	13.2	16.9	8.20183
327500	11.3	19.3	15.5	15.3667	4.00167
328000	13	29.8	23.8	22.2	8.51352
328500	13.5	22.8	20.9	19.0667	4.91359
329000	16.2	27.5	24.2	22.6333	5.81062
329500	13.4	20.7	18.5	17.5333	3.74477
330000	17.9	27.9	19.9	21.9	5.2915
330500	7.2	28.4	12.6	16.0667	11.017
331000	14.8	33.3	19.2	22.4333	9.66454
331500	14.6	20.2	18.3	17.7	2.84781
332000	17	30	27.5	24.8333	6.89807
332500	11	34.5	19.1	21.5333	11.9375
333000	10.9	14.5	12.7	12.7	1.8
333500	20.2	31.4	27.1	26.2333	5.65007
334000	19.2	43.1	31.3	31.2	11.9503
334500	12.5	28.7	23.3	21.5	8.24864
335000	10.9	20.4	15.6	15.6333	4.75009
335500	10	20	13.3	14.4333	5.09542
336000	13	24.5	16.2	17.9	5.93549
336500	22.4	33.7	28	28.0333	5.65007
337000	15.6	27.3	21.5	21.4667	5.85007
337500	17	33.2	27.3	25.8333	8.19898
338000	13.5	28	22.8	21.4333	7.34597
338500	20.8	44.6	33.2	32.8667	11.9035
339000	17.4	29	20.6	22.3333	5.9911
339500	10	33.6	14.2	19.2667	12.5894
340000	12.6	33.2	19.2	21.6667	10.5192
340500	11.1	21.1	12.7	14.9667	5.37153
341000	13.1	26.7	17.5	19.1	6.93974
341500	15	28.2	22.5	21.9	6.62042
342000	8	12.5	9.9	10.1333	2.25906
342500	7.3	32.9	14.9	18.3667	13.1474
343000	10.3	25.9	22.2	19.4667	8.15128
343500	12.3	32.2	26.5	23.6667	10.2481
344000	17.5	38	24.7	26.7333	10.4002
344500	9.6	16.5	12.8	12.9667	3.45302
345000	18.7	26.2	20.6	21.8333	3.89915
345500	18.4	27.9	23.1	23.1333	4.75009
346000	11.4	32.6	17.9	20.6333	10.8611
346500	14.6	20	18.2	17.6	2.74955
347000	19.1	30.6	22.9	24.2	5.85918
347500	12.9	21.6	18.7	17.7333	4.42982
348000	16.5	28.9	20.4	21.9333	6.34061
348500	11	24.2	16.5	17.2333	6.63049
349000	17	30.8	17	21.6	7.96743
349500	15	30	22.5	22.5	7.5
350000	13.6	23.4	15.6	17.5333	5.17816
350500	7.2	28.4	12.6	16.0667	11.017
351000	14.8	33.3	19.2	22.4333	9.66454
351500	14.6	20.2	18.3	17.7	2.84781
352000	17	30	27.5	24.8333	6.89807
352500	11	34.5	19.1	21.5333	11.9375
353000	10.9	14.5	12.7	12.7	1.8
353500	20.2	31.4	27.1	26.2333	5.65007
354000	19.2	43.1	31.3	31.2	11.9503
354500	12.5	28.7	23.3	21.5	8.24864
355000	10.9	20.4	15.6	15.6333	4.75009
355500	10	20	13.3	14.4333	5.09542
356000	13	24.5	16.2	17.9	5.93549
356500	22.4	33.7	28	28.0333	5.65007
357000	15.6	27.3	21.5	21.4667	5.85007
357500	17	33.2	27.3	25.8333	8.19898
358000	13.5	28	22.8	21.4333	7.34597
358500	20.8	44.6	33.2	32.8667	11.9035
359000	17.4	29	20.6	22.3333	5.9911
359500	10	33.6	14.2	19.2667	12.5894
360000	12.6	33.2	19.2	21.6667	10.5192
360500	11.1	21.1	12.7	14.9667	5.37153
361000	13.1	26.7	17.5	19.1	6.93974
361500	15	28.2	22.5	21.9	6.62042
362000	8	12.5	9.9	10.1333	2.25906
362500	7.3	32.9	14.9	18.3667	13.1474
363000	10.3	25.9	22.2	19.4667	8.15128
363500	12.3	32.2	26.5	23.6667	10.2481
364000	17.5	38	24.7	26.7333	10.4002
364500	9.6	16.5	12.8	12.9667	3.45302
365000	18.7	26.2	20.6	21.8333	3.89915
365500	18.4	27.9	23.1	23.1333	4.75009
366000	11.4	32.6	17.9	20.6333	10.8611
366500	14.6	20	18.2	17.6	2.74955
367000	19.1	30.6	22.9	24.2	5.85918
367500	12.9	21.6	18.7	17.7333	4.42982
368000	16.5	28.9	20.4	21.9333	6.34061
368500	11	24.2	16.5	17.2333	6.63049
369000	17	30.8	17	21.6	7.96743
369500	15	30	22.5	22.5	7.5
370000	13.6	23.4	15.6	17.5333	5.17816
370500	21.7	42.9	32.6	32.4	10.6014
371000	10.3	19.2	13.2	14.2333	4.53909
371500	13.7	21.6	21.6	18.9667	4.56107
372000	9.1	27.1	18.6	18.2667	9.00463
372500	13.9	23.8	19.4	19.0333	4.96017
373000	14.9	22.3	18.6	18.6	3.7
373500	12.9	38.9	22.1	24.6333	13.1838
374000	10	21.5	19.2	16.9	6.08523
374500	10.1	23	21.4	18.1667	7.0316
375000	12.5	35.2	19.6	22.4333	11.6122
375500	16.5	28.1	19.5	21.3667	6.02107
376000	11.2	31.6	19.3	20.7	10.2718
376500	7.9	28.1	15.8	17.2667	10.1796
377000	12.4	23.8	18.3	18.1667	5.70117
377500	15.7	28	17	20.2333	6.75747
378000	13.3	21.1	15.4	16.6	4.03609
378500	20.1	34.5	24.9	26.5	7.33212
379000	11.4	26.2	21.2	19.6	7.52861
379500	10.5	21	14	15.1667	5.34634
380000	12	30	18.8	20.2667	9.08919
380500	15	27.7	21.1	21.2667	6.35164
381000	16.2	33.4	25.6	25.0667	8.61239
381500	15.2	29.9	20.2	21.7667	7.47418
382000	14.1	21.9	17.2	17.7333	3.92726
382500	11.9	21.6	16.2	16.5667	4.86038
383000	19	32.3	24.6	25.3	6.67757
383500	11.9	22.4	18.1	17.4667	5.27857
384000	15.1	23.3	20.2	19.5333	4.14045
384500	14.5	23.6	20.6	19.5667	4.63717
385000	16.4	25.4	18.2	20	4.76235
385500	13.9	38.2	22.5	24.8667	12.3217
386000	11.9	24.6	21.6	19.3667	6.63802
386500	19.7	28.7	25.1	24.5	4.5299
387000	9.2	12.5	12.5	11.4	1.90526
387500	10.6	24.3	16.2	17.0333	6.88791
388000	15.6	27.3	15.8	19.5667	6.69801
388500	8.2	27	15.2	16.8	9.50158
389000	8.9	26.9	17.3	17.7	9.00666
389500	10.4	27.2	17.9	18.5	8.41606
390000	24.8	39.1	26.4	30.1	7.83518
390500	11.4	22.8	14	16.0667	5.97439
391000	13	26	16.7	18.5667	6.69801
391500	19.3	24.4	19.3	21	2.94449
392000	15.7	26.1	20.9	20.9	5.2
392500	8.9	35	25.2	23.0333	13.1842
393000	6.8	15.5	9.7	10.6667	4.42982
393500	8.5	20.3	16.9	15.2333	6.07399
394000	12.9	26.5	16.8	18.7333	7.00309
394500	18.6	44.8	26.1	29.8333	13.4931
395000	17.5	29.5	20.5	22.5	6.245
395500	14	24.5	17.5	18.6667	5.34634
396000	12.6	23.6	14.4	16.8667	5.90028
396500	12.3	24.2	12.3	16.2667	6.87047
397000	11.1	23.2	16.5	16.9333	6.06163
397500	10.6	22.7	16.6	16.6333	6.05007
398000	10.5	38.2	26.7	25.1333	13.9163
398500	23.3	35.7	28.2	29.0667	6.24526
399000	14.4	28.3	20.8	21.1667	6.95725
399500	19.3	37.2	27.8	28.1	8.95377
400000	16.9	28.2	19.3	21.4667	5.95343
400500	9.9	26.7	15.3	17.3	8.57671
401000	10	21.2	14.1	15.1	5.66657
401500	8.1	20.8	15.2	14.7	6.36475
402000	10.8	23.6	19.9	18.1	6.58711
402500	11.9	28.6	26.7	22.4	9.14276
403000	9.4	22.7	15.1	15.7333	6.67258
403500	12.3	33.2	27.9	24.4667	10.8648
404000	3.3	21.2	6.7	10.4	9.50631
404500	8.6	19.6	15.3	14.5	5.54346
405000	13.4	22.6	17.4	17.8	4.61303
405500	3.2	22.3	6.4	10.6333	10.2295
406000	7.1	22.6	11	13.5667	8.06246
406500	13	23.5	19.9	18.8	5.33573
407000	9.7	19.5	11.7	13.6333	5.17816
407500	11.1	21.1	14.8	15.6667	5.05602
408000	34.8	45.9	38.8	39.8333	5.62168
408500	20.8	57.5	31.3	36.5333	18.9014
409000	8.4	20.2	13.4	14	5.92284
409500	21.3	36.9	25.9	28.0333	8.01582
410000	21.4	37.5	26.7	28.5333	8.20508
410500	19.2	53.8	36.4	36.4667	17.3001
411000	20.9	38.8	26.5	28.7333	9.1566
411500	10.9	20	12.7	14.5333	4.81906
412000	15	32.9	22.6	23.5	8.98387
412500	16	26.8	17.4	20.0667	5.8731
413000	17.7	30.5	20.9	23.0333	6.66133
413500	16.1	31.3	24.4	23.9333	7.61074
414000	9.2	23.9	16.6	16.5667	7.35006
414500	13.7	26.2	20	19.9667	6.25007
415000	18.6	29.2	24.1	23.9667	5.30126
415500	17.2	32.6	21.1	23.6333	8.00646
416000	7.9	23.3	15.5	15.5667	7.70022
416500	12.5	31.8	22.7	22.3333	9.65522
417000	7.9	15.8	14.3	12.6667	4.19563
417500	8.7	26	20.8	18.5	8.87637
418000	9.3	22.8	14	15.3667	6.85298
418500	8.3	24.8	14.9	16	8.30482
419000	12.9	29.2	18.8	20.3	8.25288
419500	10.8	30.8	21.3	20.9667	10.0042
420000	8.8	32.5	25	22.1	12.1132
420500	23.6	43.5	33.6	33.5667	9.95004
421000	6.3	17	12.7	12	5.38424
421500	7.9	20.5	12.4	13.6	6.38514
422000	14.5	29	19.9	21.1333	7.32826
422500	15.1	26.3	17.5	19.6333	5.89689
423000	12.6	21.6	18	17.4	4.5299
423500	8.2	23.3	18	16.5	7.66094
424000	10.8	18.5	12.7	14	4.01123
424500	7	16	11.7	11.5667	4.50148
425000	7.8	24.2	15.7	15.9	8.20183
425500	11.8	21.1	17.9	16.9333	4.72476
426000	10.9	20	10.9	13.9333	5.25389
426500	17.2	31.1	20.7	23	7.2298
427000	7.5	17.3	11.2	12	4.94874
427500	17.5	30.2	23.9	23.8667	6.35007
428000	11.8	27.3	18.5	19.2	7.77367
428500	14.7	29.7	20.2	21.5333	7.58837
429000	8.3	25.8	16.6	16.9	8.75386
429500	12.1	24.2	15.5	17.2667	6.24046
430000	15.3	29.1	16.9	20.4333	7.54807
430500	17.3	32.8	20.7	23.6	8.14678
431000	17	32.3	23.8	24.3667	7.66572
431500	25.2	38.2	34.5	32.6333	6.69801
432000	10.3	24	17.8	17.3667	6.86027
432500	6.7	27.2	19.2	17.7	10.332
433000	9.1	20.4	14.8	14.7667	5.65007
433500	26.7	41.8	33	33.8333	7.58441
434000	6.9	13.8	8.6	9.76667	3.5949
434500	12.2	19.2	15.2	15.5333	3.51188
435000	16.7	39.1	22.3	26.0333	11.6573
435500	8.7	20.4	13.9	14.3333	5.86202
436000	9.4	32.5	19.1	20.3333	11.5993
436500	11.6	17.7	15.6	14.9667	3.09892
437000	6.8	12.2	6.8	8.6	3.11769
437500	13.2	24.8	18.1	18.7	5.82323
438000	11	18.8	12.7	14.1667	4.10163
438500	5.2	20.7	6.5	10.8	8.59826
439000	25.7	37.2	27	29.9667	6.29788
439500	23.4	29.8	27.3	26.8333	3.22542
440000	13.2	26.5	18.9	19.5333	6.67258
440500	12.2	23.2	13.9	16.4333	5.92143
441000	12.7	17.7	18.1	16.1667	3.00888
441500	15.7	41.5	26.9	28.0333	12.9373
442000	10.5	23.5	15.6	16.5333	6.55006
442500	8.4	14.9	13.3	12.2	3.38674
443000	13.6	16.7	17.4	15.9	2.02237
443500	11.1	27	24.2	20.7667	8.48783
444000	16.4	31.7	29.9	26	8.36242
444500	14	27.2	18.8	20	6.68132
445000	16.3	24.3	21.8	20.8	4.09268
445500	14.6	25.6	18.3	19.5	5.59732
446000	11.4	19.1	11.4	13.9667	4.4456
446500	13.8	33.4	21.6	22.9333	9.86779
447000	17.4	25.6	20.1	21.0333	4.17892
447500	18.8	26.4	24.5	23.2333	3.95517
448000	11.9	22.1	22.1	18.7	5.88897
448500	17.2	20.6	20.6	19.4667	1.96299
449000	17.7	24.4	20.9	21	3.35112
449500	9.8	21.6	21.6	17.6667	6.81273
450000	15	36.1	21.6	24.2333	10.7937
450500	9.9	23.1	11.5	14.8333	7.2037
451000	18.7	32.4	18.7	23.2667	7.9097
451500	13.4	17.9	14	15.1	2.44336
452000	20.5	27.3	27.3	25.0333	3.92598
452500	7.8	19	14	13.6	5.6107
453000	6.4	17.1	7.9	10.4667	5.79339
453500	7.8	13.8	12	11.2	3.07896
454000	9.5	26.2	16.4	17.3667	8.39186
454500	6.5	10.8	9.8	9.03333	2.25019
455000	8.3	16.6	11.1	12	4.22256
455500	20	38.2	29	29.0667	9.10018
456000	17.6	30.1	24.4	24.0333	6.25806
456500	13.9	26	20.4	20.1	6.05558
457000	10	18.1	15.1	14.4	4.09512
457500	10.6	14.5	12.1	12.4	1.96723
458000	16.4	28.6	19.6	21.5333	6.32561
458500	13.1	25.9	21.9	20.3	6.54828
459000	5.7	15	12.1	10.9333	4.7585
459500	11.8	19.7	18.3	16.6	4.21545
460000	18.1	26	18.1	20.7333	4.56107
460500	19	26.6	24.7	23.4333	3.95517
461000	15.1	26.2	23.9	21.7333	5.85861
461500	15.8	39.1	26.2	27.0333	11.6723
462000	21.3	62.1	36.2	39.8667	20.6457
462500	12.2	34.5	21.7	22.8	11.1906
463000	14.1	35.3	28.2	25.8667	10.7909
463500	10.1	17.9	13.4	13.8	3.91535
464000	10.3	31.7	19.5	20.5	10.735
464500	15.2	22.3	16.9	18.1333	3.7072
465000	9.8	16.6	14	13.4667	3.43123
465500	3.9	29.6	17.5	17	12.8573
466000	11.1	27.3	23.5	20.6333	8.47191
466500	13.5	26.3	25.6	21.8	7.19653
467000	10.5	30.3	16.3	19.0333	10.1791
467500	22.7	37.7	32.2	30.8667	7.58837
468000	19.7	25.1	21.6	22.1333	2.73922
468500	13.5	17.4	15.5	15.4667	1.95021
469000	20.2	31.9	24.8	25.6333	5.89435
469500	14.3	25.1	21.5	20.3	5.49909
470000	10.4	31.9	22.5	21.6	10.7782
470500	14.3	35.2	21.8	23.7667	10.5879
471000	6.9	11.2	9.4	9.16667	2.15948
471500	20	31	21.9	24.3	5.87963
472000	17.2	28.6	22.3	22.7	5.71052
472500	19.9	30.8	25.3	25.3333	5.45008
473000	22.8	59.2	29.2	37.0667	19.4333
473500	7.2	16.7	11.1	11.6667	4.77528
474000	12.4	21.6	21.2	18.4	5.2
474500	17.8	36	27.5	27.1	9.10659
475000	11.4	26.3	17.5	18.4	7.49066
475500	11.4	16.1	14.7	14.0667	2.41316
476000	14.7	27.5	18.3	20.1667	6.60101
476500	22.2	37.2	23.8	27.7333	8.23731
477000	33.9	56.5	39.4	43.2667	11.7857
477500	11.2	29.9	20.5	20.5333	9.35004
478000	11.2	28.8	26.3	22.1	9.52208
478500	13.3	31.2	22.8	22.4333	8.95563
479000	9.1	15.8	13.7	12.8667	3.42685
479500	7.4	27.8	22.2	19.1333	10.5401
480000	19.5	31	28.6	26.3667	6.06658
480500	20.7	32.9	25.2	26.2667	6.16955
481000	22.1	36.8	29	29.3	7.35459
481500	16.3	29.4	19.6	21.7667	6.81347
482000	14.5	31.2	21.7	22.4667	8.37636
482500	14.9	34.5	23.1	24.1667	9.84344
483000	21.2	45.5	29.7	32.1333	12.3314
483500	25.3	46.7	33.1	35.0333	10.8302
484000	23.2	38.2	33.1	31.5	7.62693
484500	10.4	19.3	23.1	17.6	6.51844
485000	17.3	22.5	20.7	20.1667	2.64071
485500	15.9	25.4	20.7	20.6667	4.75009
486000	21.8	31.3	30	27.7	5.15073
486500	21.2	34.7	23.1	26.3333	7.30776
487000	15	29.7	23.7	22.8	7.39121
487500	18.8	32.6	32.6	28	7.96743
488000	13.6	23.6	21.6	19.6	5.2915
488500	15.3	19.2	19.2	17.9	2.25167
489000	20.1	27	23.8	23.6333	3.45302
489500	23.9	41.3	32.4	32.5333	8.70077
490000	19.2	36.4	26.8	27.4667	8.61936
490500	27.9	40.2	31.3	33.1333	6.35164
491000	27	43.3	36.1	35.4667	8.16844
491500	15.2	28.5	22.8	22.1667	6.67258
492000	14.7	31.6	23.7	23.3333	8.45596
492500	21.7	41.3	33.1	32.0333	9.84344
493000	23.1	40.5	30.9	31.5	8.7155
493500	8.7	22.1	14.7	15.1667	6.71218
494000	12.3	21.1	21.1	18.1667	5.08068
494500	16.7	32.4	18.5	22.5333	8.59205
495000	51	68	61.3	60.1	8.56329
495500	30.3	44.6	39.2	38.0333	7.22103
496000	34.1	57.1	53.2	48.1333	12.3087
496500	12.9	25.8	18.5	19.0667	6.46864
497000	10.8	27.9	21.7	20.1333	8.65698
497500	20.4	34.8	33	29.4	7.84602
498000	15.1	30.5	20.2	21.9333	7.84496
498500	19.5	31.3	25.4	25.4	5.9
499000	19.5	33	22.7	25.0667	7.05431
499500	16.3	27.5	21.2	21.6667	5.61456
500000	8.6	16.1	10.7	11.8	3.86911
500500	17.8	34.8	31	27.8667	8.92263
501000	19.4	33	23.3	25.2333	7.00309
501500	14.7	20.9	17.1	17.5667	3.12623
502000	35	49	42	42	7
502500	18.1	33.3	21.7	24.3667	7.94313
503000	23	42.9	29.6	31.8333	10.1362
503500	16.8	33.3	21.9	24	8.44808
504000	26.2	35.7	30	30.6333	4.78156
504500	13.7	33.2	19.5	22.1333	10.0132
505000	7.8	21	12.6	13.8	6.68132
505500	9	18.8	18.2	15.3333	5.49303
506000	9.7	22.6	16.1	16.1333	6.45006
506500	23.3	28.7	28.7	26.9	3.11769
507000	14.1	21.2	19.4	18.2333	3.69098
507500	16.8	29.9	21.8	22.8333	6.61085
508000	18	29.7	24.1	23.9333	5.85178
508500	11.2	21.5	17.9	16.8667	5.22717
509000	19.5	31.6	28.2	26.4333	6.24046
509500	20.5	43.1	24	29.2	12.1643
510000	24.5	40.2	24.9	29.8667	8.95116
510500	17.5	35.1	25.3	25.9667	8.81892
511000	23.3	38.8	29.1	30.4	7.83135
511500	30.8	50.5	38	39.7667	9.96812
512000	34.1	61.3	45.7	47.0333	13.6489
512500	20.8	43.9	32.2	32.3	11.5503
513000	16	37.3	32.3	28.5333	11.1384
513500	12.9	22.1	18.4	17.8	4.62925
514000	10.6	26.7	24.8	20.7	8.7983
514500	15.5	29.1	23.6	22.7333	6.8413
515000	35.3	47.2	41.3	41.2667	5.95007
515500	19.7	32.3	19.7	23.9	7.27461
516000	16.2	36.9	33.7	28.9333	11.1429
516500	8.9	27	11.6	15.8333	9.76439
517000	12.2	16.9	14.3	14.4667	2.35443
517500	17.1	27.7	23	22.6	5.31131
518000	19.2	33.6	31.9	28.2333	7.86914
518500	20.6	36.8	27.5	28.3	8.12958
519000	21	61.7	30.6	37.7667	21.2754
519500	48.8	74.1	54.3	59.0667	13.3065
520000	38.2	67.6	45	50.2667	15.3913
520500	17.8	27.9	25.6	23.7667	5.29371
521000	25.3	50.5	34.2	36.6667	12.7798
521500	28.1	53.8	39.4	40.4333	12.8811
522000	19.4	35.3	23	25.9	8.33727
522500	14.9	25.3	16.8	19	5.53805
523000	24.1	37.6	30.1	30.6	6.76387
523500	20.7	33.2	27.1	27	6.2506
524000	27.2	40.8	31.1	33.0333	7.00309
524500	13.6	21.2	19.2	18	3.93954
525000	9.3	15.5	13.9	12.9	3.2187
525500	11.3	30.7	20.5	20.8333	9.70429
526000	13.3	42.7	22.2	26.0667	15.0766
526500	17.4	36	24.6	26	9.3787
527000	12.9	27	20.9	20.2667	7.0713
527500	8.5	23.8	15.3	15.8667	7.66572
528000	16.8	34	22.9	24.5667	8.72028
528500	16	26.7	24.9	22.5333	5.72917
529000	11	20.7	20.7	17.4667	5.6003
529500	8	27.5	16	17.1667	9.80221
530000	14	26.7	20.8	20.5	6.35531
530500	16.9	32.2	24.6	24.5667	7.65005
531000	15.2	24.8	24.8	21.6	5.54256
531500	16.9	28.1	18.7	21.2333	6.01443
532000	10.3	22.4	13.8	15.5	6.22656
532500	8.5	21.7	18.3	16.1667	6.85371
533000	11.9	18.6	13.2	14.5667	3.55293
533500	9.5	13.3	9.5	10.7667	2.19393
534000	11.3	11.3	15.6	12.7333	2.48261
534500	8.3	19.5	14.2	14	5.60268
535000	17.7	36.9	30.6	28.4	9.78724
535500	19.2	35	22.7	25.6333	8.29839
536000	19.5	31.3	26	25.6	5.91016
536500	12.7	14.3	12.7	13.2333	0.92376
537000	12.3	17.6	19.4	16.4333	3.69098
537500	14.7	22.1	20.3	19.0333	3.85919
538000	14.5	22.8	19.5	18.9333	4.17892
538500	18.5	27.8	26	24.1	4.93254
539000	15.5	32.9	25.1	24.5	8.7155
539500	10.4	28.7	16.6	18.5667	9.30717
540000	15.4	21	18.5	18.3	2.80535
540500	56.5	63.7	60.2	60.1333	3.60046
541000	103.1	112.4	112.4	109.3	5.36936
541500	15	15	51.3	27.1	20.9578
542000	18	21.6	44.8	28.1333	14.5456
542500	106.4	112.4	153.8	124.2	25.8093
543000	181.8	196.1	188.7	188.867	7.15146
543500	144.9	163.9	158.7	155.833	9.81903
544000	109.9	156.3	138.9	135.033	23.4404
544500	96.2	144.9	112.4	117.833	24.8005
545000	92.6	135.1	117.6	115.1	21.36
545500	101	137	117.6	118.533	18.0181
546000	112.4	158.7	128.2	133.1	23.5357
546500	123.5	166.7	144.9	145.033	21.6003
547000	137	169.5	153.8	153.433	16.2531
547500	163.9	178.6	175.4	172.633	7.73067
548000	161.3	166.7	163.9	163.967	2.70062
548500	138.9	147.1	140.8	142.267	4.29224
549000	144.9	147.1	144.9	145.633	1.27017
549500	126.6	128.2	128.2	127.667	0.92376
550000	131.6	131.6	131.6	131.6	0
550500	120.5	120.5	120.5	120.5	0
551000	109.9	113.6	111.1	111.533	1.88768
551500	116.3	119	119	118.1	1.55885
552000	113.6	117.6	116.3	115.833	2.04042
552500	92.6	95.2	92.6	93.4667	1.50111
553000	92.6	98	98	96.2	3.11769
553500	88.5	92.6	90.1	90.4	2.0664
554000	76.3	77.5	77.5	77.1	0.69282
554500	78.1	90.1	86.2	84.8	6.12127
555000	77.5	86.2	84	82.5667	4.52364
555500	82	84	82	82.6667	1.1547
556000	74.6	76.3	76.3	75.7333	0.981495
556500	83.3	85.5	85.5	84.7667	1.27017
557000	62.5	71.9	64.5	66.3	4.95177
557500	63.7	63.7	63.7	63.7	8.70234e-15
558000	62.5	64.5	62.5	63.1667	1.1547
558500	57.1	59.9	58.8	58.6	1.41067
559000	70.4	76.3	74.6	73.7667	3.03699
559500	63.7	67.6	65.8	65.7	1.95192
560000	51	56.8	56.8	54.8667	3.34863
560500	50.5	50.5	52.4	51.1333	1.09697
561000	62.9	66.7	66.7	65.4333	2.19393
561500	56.5	64.1	60.2	60.2667	3.80044
562000	62.1	68	64.1	64.7333	3.00056
562500	56.5	58.5	58.5	57.8333	1.1547
563000	47.8	53.5	51.5	50.9333	2.89194
563500	51.5	53.2	53.2	52.6333	0.981495
564000	59.9	82	74.1	72	11.1987
564500	49.5	59.2	53.5	54.0667	4.87476
565000	52.4	58.1	56.2	55.5667	2.9023
565500	50.5	50.5	50.5	50.5	0
566000	47.2	47.2	51	48.4667	2.19393
566500	58.1	59.9	59.9	59.3	1.03923
567000	52.6	60.2	54.3	55.7	3.98873
567500	47.6	49.5	47.6	48.2333	1.09697
568000	49.5	53.2	51.3	51.3333	1.85023
568500	52.9	62.5	58.8	58.0667	4.84183
569000	45.2	49.3	47.2	47.2333	2.0502
569500	39.1	45.2	46.9	43.7333	4.10163
570000	52.1	52.1	52.1	52.1	0
570500	50.3	57.8	55.9	54.6667	3.89915
571000	47.8	69.9	53.2	56.9667	11.5214
571500	54.9	77.5	58.8	63.7333	12.0807
572000	48.5	59.9	52.4	53.6	5.79396
572500	49	58.8	53.2	53.6667	4.91664
573000	38.8	44.2	40.5	41.1667	2.76104
573500	55.2	57.8	57.8	56.9333	1.50111
574000	48.5	61.3	55.9	55.2333	6.42599
574500	46.3	58.8	53.5	52.8667	6.27402
575000	49	69	56.2	58.0667	10.1298
575500	46.3	67.1	54.3	55.9	10.4919
576000	69.4	87	75.2	77.2	8.96883
576500	48.5	63.7	59.9	57.3667	7.91033
577000	37.7	39.7	39.7	39.0333	1.1547
577500	49.5	53.5	49.5	50.8333	2.3094
578000	42.7	58.1	46.5	49.1	8.02247
578500	42.2	58.1	54.9	51.7333	8.40972
579000	38.6	46.3	44.4	43.1	4.01123
579500	36.6	40.5	36.6	37.9	2.25167
580000	44.6	50.5	48.5	47.8667	3.00056
580500	37.6	43.1	41.3	40.6667	2.80416
581000	49.3	65.4	57.1	57.2667	8.05129
581500	40	61.3	46.3	49.2	10.9421
582000	43.7	59.2	51.3	51.4	7.75048
582500	36.8	44.4	44.4	41.8667	4.38786
583000	37.5	44.6	44.6	42.2333	4.09919
583500	43.3	47.4	45.2	45.3	2.05183
584000	40.5	46.3	44.2	43.6667	2.93655
584500	36.4	43.3	40	39.9	3.45109
585000	45.5	47.6	47.6	46.9	1.21244
585500	42.4	53.8	44.2	46.8	6.12862
586000	33.7	47.2	39.1	40	6.79485
586500	34.8	40.3	38.5	37.8667	2.80416
587000	36.2	47.8	43.9	42.6333	5.90282
587500	33.8	35.6	35.6	35	1.03923
588000	44.1	54.1	50.3	49.5	5.04777
588500	32.5	41.5	37.9	37.3	4.5299
589000	40.2	51	47.8	46.3333	5.54737
589500	39.1	52.6	50.8	47.5	7.33008
590000	42.4	50.3	46.3	46.3333	3.95011
590500	38.5	44.4	38.5	40.4667	3.40637
591000	35.7	49.3	38.3	41.1	7.21942
591500	46.5	68	52.4	55.6333	11.1087
592000	40.5	46.3	44.4	43.7333	2.95691
592500	38.3	45.9	42.2	42.1333	3.80044
593000	42	54.6	52.6	49.7333	6.77151
593500	36	52.9	45.5	44.8	8.47172
594000	36.1	42.4	39.8	39.4333	3.16596
594500	34.5	41.7	38.2	38.1333	3.60046
595000	30.4	41.5	37.6	36.5	5.63116
595500	39.1	44.8	39.1	41	3.2909
596000	36.4	40	40	38.8	2.07846
596500	49	56.8	52.9	52.9	3.9
597000	34.7	40.5	34.7	36.6333	3.34863
597500	40.2	50.8	42	44.3333	5.67215
598000	39.4	61	49.3	49.9	10.8125
598500	45.2	49	46.9	47.0333	1.90351
599000	35.8	45.5	42	41.1	4.91223
599500	28	37.3	31.7	32.3333	4.68224
600000	29.9	38.8	36.9	35.2	4.68722
600500	33.9	35.8	35.8	35.1667	1.09697
601000	31.6	39.1	39.1	36.6	4.33013
601500	36.2	43.5	39.8	39.8333	3.65011
602000	46.5	51	46.9	48.1333	2.49065
602500	42	55.6	45.9	47.8333	7.00309
603000	36.6	48.3	44.4	43.1	5.95735
603500	32.1	39.7	39.7	37.1667	4.38786
604000	47.4	60.6	51.3	53.1	6.78159
604500	38.9	40.8	38.9	39.5333	1.09697
605000	35.3	40.8	39.1	38.4	2.81603
605500	37.2	50.3	44.6	44.0333	6.56836
606000	41.8	56.2	54.6	50.8667	7.89261
606500	38	49.5	45.7	44.4	5.85918
607000	30.9	40.5	38.6	36.6667	5.08363
607500	40.5	56.8	52.9	50.0667	8.51136
608000	35.5	42.2	36.4	38.0333	3.63639
608500	29.5	35.2	35	33.2333	3.23471
609000	40	49.3	41.8	43.7	4.93254
609500	33.9	45.9	36	38.6	6.40859
610000	41	54.6	45.5	47.0333	6.92844
610500	42.2	46.1	48.1	45.4667	3.00056
611000	36.2	43.9	38.2	39.4333	3.99541
611500	34.1	39.5	39.5	37.7	3.11769
612000	33.6	43.9	43.9	40.4667	5.94671
612500	30.9	39.5	37.7	36.0333	4.53578
613000	40.8	44.6	42.7	42.7	1.9
613500	39.2	49	45	44.4	4.92747
614000	34.4	52.4	40.7	42.5	9.134
614500	37.9	43.7	39.8	40.4667	2.95691
615000	39.5	46.9	43.3	43.2333	3.70045
615500	32.2	43.5	41.5	39.0667	6.0302
616000	43.1	52.1	46.7	47.3	4.5299
616500	33.2	41.2	41.2	38.5333	4.6188
617000	34.4	42	38.2	38.2	3.8
617500	44.1	57.5	47.8	49.8	6.92026
618000	41.7	49.3	45.5	45.5	3.8
618500	39.7	45.7	41.7	42.3667	3.05505
619000	35.6	43.1	39.4	39.3667	3.75011
619500	36.2	43.5	39.8	39.8333	3.65011
620000	24.8	31.6	29.6	28.6667	3.49476
620500	42.7	60.6	48.1	50.4667	9.18168
621000	38.6	46.3	42.4	42.4333	3.85011
621500	34.1	43.7	41.8	39.8667	5.08363
622000	32.6	34.5	34.5	33.8667	1.09697
622500	34.7	50	42	42.2333	7.65267
623000	35.8	50	39.8	41.8667	7.32211
623500	38.5	53.8	42	44.7667	8.01644
624000	29.2	43.9	34.6	35.9	7.43572
624500	32.1	42.9	33.8	36.2667	5.80718
625000	33.6	39.1	35.3	36	2.81603
625500	35.6	41.8	41.8	39.7333	3.57957
626000	32.2	46.7	38.9	39.2667	7.25695
626500	29.5	48.1	38.8	38.8	9.3
627000	42	52.9	47.4	47.4333	5.45008
627500	44.2	49.8	47.8	47.2667	2.83784
628000	39.5	49.3	45.5	44.7667	4.94099
628500	31.5	41.5	39.2	37.4	5.23737
629000	31.3	45	33.2	36.5	7.42226
629500	38.9	52.1	48.3	46.4333	6.7951
630000	46.3	59.9	52.1	52.7667	6.82447
630500	39.5	54.6	47.2	47.1	7.5505
631000	25.2	33.3	29.3	29.2667	4.0501
631500	37.6	48.3	42.9	42.9333	5.35008
632000	35.6	45	37.5	39.3667	4.97024
632500	39.4	43.3	39.4	40.7	2.25167
633000	38.3	45.9	42.2	42.1333	3.80044
633500	33.4	41.8	33.4	36.2	4.84974
634000	45	65.8	56.5	55.7667	10.4194
634500	40.7	51.8	44.4	45.6333	5.65184
635000	47.8	55.6	53.8	52.4	4.08412
635500	42.7	58.1	48.5	49.7667	7.77775
636000	36.4	44.1	40.2	40.2333	3.85011
636500	29.8	37.9	36	34.5667	4.23596
637000	27.5	31.2	29.3	29.3333	1.85023
637500	32.4	47.6	40	40	7.6
638000	29.9	41.2	35.6	35.5667	5.65007
638500	38.2	52.4	42.9	44.5	7.23395
639000	35.3	48.3	39.1	40.9	6.68431
639500	31.1	33.1	33.1	32.4333	1.1547
640000	34.4	42	38.2	38.2	3.8
640500	29	32.8	30.9	30.9	1.9
641000	39.1	42.7	42.7	41.5	2.07846
641500	23.8	35.7	29.8	29.7667	5.95007
642000	35.2	45.7	42.6	41.1667	5.39475
642500	30.6	36	32.4	33	2.74955
643000	30.6	40.2	34.5	35.1	4.82804
643500	31.9	41	36.9	36.6	4.55741
644000	30.3	36.9	34.2	33.8	3.31813
644500	35.8	45.2	41.5	40.8333	4.73533
645000	40.5	45.7	42.2	42.8	2.65141
645500	26.2	27.9	26.2	26.7667	0.981495
646000	35.6	43.1	41.3	40	3.91535
646500	31.6	42.9	37.3	37.2667	5.65007
647000	40.2	45.9	42	42.7	2.91376
647500	39.2	44.8	42.9	42.3	2.84781
648000	45.9	51.8	45.9	47.8667	3.40637
648500	40	57.1	45.9	47.6667	8.68581
649000	37.2	49.3	43.7	43.4	6.05558
649500	35.3	47.2	39.2	40.5667	6.06658
650000	33.1	48.8	41	40.9667	7.85005
650500	31.3	42.4	33.1	35.6	5.95735
651000	32.9	45.7	36.6	38.4	6.58711
651500	37.6	37.6	37.6	37.6	0
652000	37	47.6	47.6	44.0667	6.11991
652500	25.4	37.2	31.3	31.3	5.9
653000	35.3	44.6	42.7	40.8667	4.91359
653500	31.3	43.9	40.2	38.4667	6.47637
654000	30.1	38.9	35.1	34.7	4.41362
654500	37	56.5	46.7	46.7333	9.75004
655000	31.6	41	39.1	37.2333	4.97024
655500	36	46.7	39.5	40.7333	5.45558
656000	28.9	34.7	30.8	31.4667	2.95691
656500	30.6	34.4	34.4	33.1333	2.19393
657000	30.7	39.7	32.5	34.3	4.76235
657500	38.2	40.7	38.2	39.0333	1.44338
658000	38.5	56.2	43.1	45.9333	9.18386
658500	37	46.7	41	41.5667	4.87476
659000	30.2	33.8	32.1	32.0333	1.80093
659500	35.6	52.9	44.6	44.3667	8.65236
660000	40.5	46.3	42.4	43.0667	2.95691
660500	36.6	56.2	44.4	45.7333	9.86779
661000	35.1	40.7	38.8	38.2	2.84781
661500	35.5	42.9	37.3	38.5667	3.85919
662000	28.9	28.9	28.9	28.9	4.35117e-15
662500	37	45	39.2	40.4	4.1328
663000	39.4	57.1	51.3	49.2667	9.02349
663500	42.6	52.4	48.3	47.7667	4.92172
664000	38.3	46.1	40.2	41.5333	4.06735
664500	38.5	47.6	42.4	42.8333	4.56545
665000	32.5	48.8	37.6	39.6333	8.33807
665500	38	43.9	40	40.6333	3.00056
666000	31.1	42.4	34.7	36.0667	5.77264
666500	29.6	39.7	32.1	33.8	5.26023
667000	32.1	43.5	37.5	37.7	5.70263
667500	34.7	47.2	41.3	41.0667	6.25327
668000	34.8	48.3	40.7	41.2667	6.76782
668500	31.3	49	41.2	40.5	8.87074
669000	29.5	44.2	34.7	36.1333	7.45408
669500	33	38.3	33	34.7667	3.05996
670000	35.6	46.7	44.4	42.2333	5.85861
670500	33.4	47.4	39.4	40.0667	7.02377
671000	39.7	58.8	49.3	49.2667	9.55004
671500	31	40.5	32.7	34.7333	5.0659
672000	30.3	46.1	34.6	37	8.16884
672500	35.1	40.5	38.6	38.0667	2.73922
673000	33	40.7	35.1	36.2667	3.98037
673500	35.1	38	36.1	36.4	1.47309
674000	30.9	41.8	38.2	36.9667	5.55368
674500	30	30	30	30	0
675000	32.6	49.8	40.2	40.8667	8.61936
675500	34.5	42.6	36.8	37.9667	4.17413
676000	31.1	37.2	33.4	33.9	3.08058
676500	38	61.3	49.8	49.7	11.6503
677000	30.9	41	37	36.3	5.08626
677500	46.9	65.8	52.6	55.1	9.69484
678000	32.7	44.2	36.5	37.8	5.85918
678500	36.2	45.2	41.3	40.9	4.51331
679000	42.4	46.3	44.4	44.3667	1.95021
679500	41.7	53.2	49.3	48.0667	5.84836
680000	29.4	35	35	33.1333	3.23316
680500	27.4	47.4	39.2	38	10.0539
681000	28.2	34.5	30.7	31.1333	3.17228
681500	42.7	52.4	50.5	48.5333	5.14036
682000	23.5	25.4	23.5	24.1333	1.09697
682500	34.6	36.5	34.6	35.2333	1.09697
683000	32.1	35.8	34	33.9667	1.85023
683500	36.5	42.2	38.5	39.0667	2.89194
684000	29	32.6	30.8	30.8	1.8
684500	36.8	48.8	43.9	43.1667	6.03352
685000	28.3	42.6	31.8	34.2333	7.45408
685500	29.1	35	31.1	31.7333	3.00056
686000	27.3	42	34.6	34.6333	7.35006
686500	24.4	27.6	27.6	26.5333	1.84752
687000	35.2	42.7	38.9	38.9333	3.75011
687500	27.3	35.7	31.6	31.5333	4.2004
688000	31	40.2	32.8	34.6667	4.87579
688500	28.1	39.4	33.8	33.7667	5.65007
689000	25.6	29	29	27.8667	1.96299
689500	38.3	49.8	46.1	44.7333	5.87055
690000	28.4	32.5	30.3	30.4	2.05183
690500	37.3	44.4	40.8	40.8333	3.55012
691000	35.7	41.3	35.7	37.5667	3.23316
691500	37.5	44.2	41.2	40.9667	3.35609
692000	29.6	38.9	35.2	34.5667	4.68224
692500	27	34.1	28.7	29.9333	3.7072
693000	30.1	31.9	30.1	30.7	1.03923
693500	23.6	25.4	23.6	24.2	1.03923
694000	32.6	42.2	42.2	39	5.54256
694500	27.9	37.3	31.7	32.3	4.72864
695000	32.8	41	36.4	36.7333	4.11015
695500	23.4	37.9	28.4	29.9	7.36546
696000	29.9	47.2	38.9	38.6667	8.65236
696500	21.4	35	31.1	29.1667	7.00309
697000	29.8	43.1	32.8	35.2333	6.97591
697500	25.2	40.7	31.1	32.3333	7.82326
698000	30.8	42	34.7	35.8333	5.68536
698500	24.2	36.4	30.8	30.4667	6.10683
699000	28.2	35.7	33.8	32.5667	3.89915
699500	25.8	37.6	31.1	31.5	5.91016
700000	27.2	48.5	36.6	37.4333	10.6744
700500	26.9	50	40.3	39.0667	11.5993
701000	27.9	42.9	37.2	36	7.57166
701500	35.8	47.6	40	41.1333	5.98108
702000	27.5	37.7	31	32.0667	5.18298
702500	31.1	40.8	36.9	36.2667	4.88092
703000	32.3	40.3	32.3	34.9667	4.6188
703500	30.6	36.9	34.4	33.9667	3.17228
704000	36	45.5	43.7	41.7333	5.04612
704500	41.3	45.2	43.3	43.2667	1.95021
705000	31.5	39.5	35.6	35.5333	4.00042
705500	71.9	97.1	79.4	82.8	12.9395
706000	59.5	81.3	71.4	70.7333	10.9153
706500	59.2	98	70.9	76.0333	19.9028
707000	28.8	37.7	30.6	32.3667	4.70567
707500	25.4	35.6	30.5	30.5	5.1
708000	25.3	37	33.1	31.8	5.95735
708500	22	40.8	31.2	31.3333	9.40071
709000	25.2	29.1	29.1	27.8	2.25167
709500	26.3	36.8	31.5	31.5333	5.25008
710000	21.8	34.2	29.6	28.5333	6.26844
710500	19.8	27.1	23.4	23.4333	3.65011
711000	20.8	23.3	21.3	21.8	1.32288
711500	18.8	26.2	22.5	22.5	3.7
712000	26.1	34.2	27.7	29.3333	4.28991
712500	21.7	41.7	32.2	31.8667	10.0042
713000	26.2	35.1	29.6	30.3	4.4911
713500	28.9	42.4	40.5	37.2667	7.30776
714000	19.6	21.4	19.6	20.2	1.03923
714500	32.4	45.7	39.7	39.2667	6.66058
715000	21	40.2	32.5	31.2333	9.66247
715500	24	36.1	26.6	28.9	6.36946
716000	19.6	29.4	22.8	23.9333	4.99733
716500	25.6	29.1	27.4	27.3667	1.75024
717000	23	40.5	24.9	29.4667	9.60226
717500	25.1	37.5	32.9	31.8333	6.26844
718000	31.7	37.7	31.7	33.7	3.4641
718500	25.5	33.6	27.4	28.8333	4.23596
719000	31.3	37	35.1	34.4667	2.9023
719500	22.3	31.5	26	26.6	4.62925
720000	19.8	25.7	21.7	22.4	3.01164
720500	26.1	35.5	29.9	30.5	4.72864
721000	22.9	30.6	28.7	27.4	4.01123
721500	19.4	27.3	25.4	24.0333	4.12351
722000	27.8	44.4	38.9	37.0333	8.45596
722500	19.6	30.7	26.2	25.5	5.58301
723000	23.9	35.3	30.1	29.7667	5.70731
723500	28.6	44.4	32.4	35.1333	8.24702
724000	22.3	29.7	26	26	3.7
724500	19.3	31.5	22.8	24.5333	6.28198
725000	24.6	32.5	29.6	28.9	3.99625
725500	15.6	22.2	22.2	20	3.81051
726000	19.6	28.6	23.5	23.9	4.51331
726500	27.6	47.4	37.5	37.5	9.9
727000	20.7	29.3	24.2	24.7333	4.32474
727500	23.3	33.4	28.2	28.3	5.05074
728000	10.8	23.6	14.4	16.2667	6.60101
728500	18.8	26.3	24.4	23.1667	3.89915
729000	22.6	40.2	28.8	30.5333	8.92711
729500	18.9	30.3	26.5	25.2333	5.8046
730000	19.8	30.6	27	25.8	5.49909
730500	23.9	31.8	23.9	26.5333	4.56107
731000	15.5	31.9	24.2	23.8667	8.20508
731500	21.1	33.3	26.5	26.9667	6.11337
732000	25.6	42	32.9	33.5	8.21645
732500	22.5	42	26.3	30.2667	10.3375
733000	19	28.7	24.3	24	4.85695
733500	27	35.7	31.2	31.3	4.35086
734000	27	41.3	32.4	33.5667	7.22103
734500	24.4	38.2	33.1	31.9	6.97782
735000	16.9	30.1	22.6	23.2	6.62042
735500	19.3	29	22.5	23.6	4.94267
736000	21.1	33.7	28	27.6	6.30952
736500	13.4	28.1	19.3	20.2667	7.39752
737000	24.7	35.3	29.8	29.9333	5.30126
737500	23.5	39.8	33.3	32.2	8.20549
738000	15.8	30.1	17.5	21.1333	7.81174
738500	19.3	30	25	24.7667	5.35381
739000	18.1	23	23	21.3667	2.82902
739500	23.7	30.5	25.4	26.5333	3.53883
740000	20.1	32.4	22.8	25.1	6.46452
740500	22.1	40.2	29.4	30.5667	9.10622
741000	20	35.2	25.9	27.0333	7.66312
741500	24.4	41.7	27.9	31.3333	9.14677
742000	22.3	33.6	24	26.6333	6.09289
742500	13	28.2	21.8	21	7.63151
743000	13.8	25.4	20.1	19.7667	5.80718
743500	18.6	24.8	21.6	21.6667	3.10054
744000	21.9	34.7	31.1	29.2333	6.60101
744500	18	19.8	18	18.6	1.03923
745000	21.1	32.6	24.9	26.2	5.85918
745500	19.3	25	21.4	21.9	2.88271
746000	26.6	38	34.2	32.9333	5.8046
746500	21.2	34.8	23.2	26.4	7.34302
747000	19.6	36.5	27.4	27.8333	8.45833
747500	19.9	30.4	26.6	25.6333	5.31633
748000	15.3	28	18.4	20.5667	6.62143
748500	23.6	31.8	23.6	26.3333	4.73427
749000	35.2	50.8	41	42.3333	7.88501
749500	20.9	34.2	26.7	27.2667	6.66808
750000	23.6	31.4	29.5	28.1667	4.06735
750500	20.4	28.8	23.8	24.3333	4.22532
751000	25	30.8	25	26.9333	3.34863
751500	15.2	23.8	16.9	18.6333	4.55448
752000	12.2	24.3	13.7	16.7333	6.59571
752500	12.4	22.3	14.9	16.5333	5.14814
753000	18	25.3	23.3	22.2	3.77227
753500	20.1	29.2	25.6	24.9667	4.58294
754000	16.1	29.1	21.4	22.2	6.53682
754500	18.2	33.3	28.3	26.6	7.6922
755000	22.1	34.2	30.5	28.9333	6.20027
755500	16.5	24.9	20.2	20.5333	4.20991
756000	13.7	34.4	18.9	22.3333	10.7686
756500	16.4	36.5	26.6	26.5	10.0504
757000	16.9	32.8	25.4	25.0333	7.95634
757500	27.2	31.1	29.2	29.1667	1.95021
758000	23.9	27.6	23.9	25.1333	2.1362
758500	23.3	36.9	31.1	30.4333	6.82447
759000	25.4	39.2	29.1	31.2333	7.14306
759500	24.3	33	26	27.7667	4.61122
760000	20.7	26.4	24.5	23.8667	2.9023
760500	24.4	27.9	26	26.1	1.75214
761000	19.7	32.3	23.3	25.1	6.48999
761500	21.9	25.1	23.5	23.5	1.6
762000	14	30	22.9	22.3	8.01686
762500	18.3	41.5	31.6	30.4667	11.6414
763000	14	37	27.1	26.0333	11.537
763500	12	26	14	17.3333	7.57188
764000	16.5	20.5	18	18.3333	2.02073
764500	19.9	28.5	22.8	23.7333	4.37531
765000	19.6	36.5	26.1	27.4	8.52467
765500	18.6	33.4	18.6	23.5333	8.54478
766000	15.5	31	21.3	22.6	7.83135
766500	15.3	30.6	21.1	22.3333	7.7242
767000	16.9	28.2	24.3	23.1333	5.73963
767500	16.9	32.1	20.3	23.1	7.97747
768000	11.2	26.2	15	17.4667	7.79829
768500	15.8	23.6	18.9	19.4333	3.92726
769000	12.7	26	20	19.5667	6.66058
769500	15.9	24.9	21.1	20.6333	4.51811
770000	11.7	26.8	14	17.5	8.13572
770500	19.2	32.7	26.9	26.2667	6.77225
771000	22.9	28.6	24.2	25.2333	2.98719
771500	11.9	31.2	20.7	21.2667	9.66247
772000	9	30.5	17.9	19.1333	10.8029
772500	14.5	33.1	25.3	24.3	9.34024
773000	14	26.2	21	20.4	6.12209
773500	12.3	28.2	19.4	19.9667	7.96513
774000	25.8	34.4	29.5	29.9	4.31393
774500	22.3	27.9	22.3	24.1667	3.23316
775000	19.6	28.7	22.6	23.6333	4.63717
775500	21.6	25.2	23.4	23.4	1.8
776000	21.1	32.6	22.9	25.5333	6.18574
776500	16.1	27.3	24.1	22.5	5.76888
777000	22.4	39.5	31.5	31.1333	8.55589
777500	16.9	31.8	22.5	23.7333	7.52618
778000	16.2	30.4	26.6	24.4	7.35119
778500	24.3	30.7	27.7	27.5667	3.20208
779000	17	26.5	18.9	20.8	5.02693
779500	27.5	37.3	35.5	33.4333	5.21664
780000	19.9	38.8	29.5	29.4	9.4504
780500	22.3	38.2	34.4	31.6333	8.30321
781000	18.8	27.9	24.4	23.7	4.59021
781500	22.1	27.9	23.6	24.5333	3.01054
782000	24.1	38.9	27.8	30.2667	7.70216
782500	16.2	19.8	16.2	17.4	2.07846
783000	22.6	28.2	26.3	25.7	2.84781
783500	20.7	26.4	24.5	23.8667	2.9023
784000	20.8	26	22.6	23.1333	2.64071
784500	10.1	22.4	15.9	16.1333	6.15332
785000	17.5	29.2	29.2	25.3	6.755
785500	19.3	21.2	21.2	20.5667	1.09697
786000	19.6	21.6	23.5	21.5667	1.95021
786500	17	28.7	21.5	22.4	5.90169
787000	13.9	39.5	23.4	25.6	12.941
787500	11.3	16.9	16.9	15.0333	3.23316
788000	13.3	37.7	27.4	26.1333	12.2492
788500	16	39.7	34	29.9	12.3705
789000	18.6	26.2	22.7	22.5	3.80395
789500	16.8	28.3	21.8	22.3	5.76628
790000	17.3	25	19.2	20.5	4.01123
790500	23.7	35.6	29.6	29.6333	5.95007
791000	19.8	32.5	22	24.7667	6.787
791500	27.3	38.3	32.8	32.8	5.5
792000	21	36.4	28.7	28.7	7.7
792500	11.5	29.7	19.2	20.1333	9.13583
793000	19.8	42.7	31.4	31.3	11.4503
793500	17.8	24.9	19.6	20.7667	3.69098
794000	17.9	30.5	23.3	23.9	6.32139
794500	22.2	38.5	27.8	29.5	8.28191
795000	19.5	31.2	27.2	25.9667	5.94671
795500	20.8	35.3	26	27.3667	7.34597
796000	14.2	25.6	18.6	19.4667	5.7492
796500	16.9	26.2	21.9	21.6667	4.65439
797000	19.2	38.6	28	28.6	9.71391
797500	15.1	32.8	25.4	24.4333	8.88951
798000	16.8	29.9	24.3	23.6667	6.57292
798500	19.6	25.1	23.5	22.7333	2.82902
799000	15.7	27.5	21.6	21.6	5.9
799500	13.9	24.5	16.6	18.3333	5.50848
800000	23.7	34.7	32.9	30.4333	5.90028
800500	25.4	31.3	29.3	28.6667	3.00056
801000	23	31.8	26.5	27.1	4.43058
801500	23	36.5	26.9	28.8	6.94766
802000	18.3	29.3	25.6	24.4	5.59732
802500	19.7	35.1	27.2	27.3333	7.70087
803000	13.8	28.3	18.7	20.2667	7.37586
803500	14	28.5	22.9	21.8	7.31232
804000	22.5	26.2	26.2	24.9667	2.1362
804500	14.5	27.7	25.3	22.5	7.03136
805000	22	31.3	24	25.7667	4.89524
805500	14.5	27.2	21.8	21.1667	6.37364
806000	11.3	25.4	15.6	17.4333	7.22657
806500	12	22.1	17	17.0333	5.05008
807000	18.8	28.2	20.7	22.5667	4.97024
807500	17.2	29.1	23.6	23.3	5.95567
808000	11.8	29.4	21.6	20.9333	8.81892
808500	19.7	31.8	24.8	25.4333	6.07481
809000	17	20.4	18.7	18.7	1.7
809500	15.1	20.3	18.4	17.9333	2.63122
810000	15.6	31.3	26	24.3	7.98686
810500	14.7	29.3	22.3	22.1	7.30205
811000	18.7	33.7	24.3	25.5667	7.5798
811500	14.8	23	19.7	19.1667	4.12593
812000	13.6	23.8	15.3	17.5667	5.46474
812500	19.5	38.5	22.7	26.9	10.1725
813000	19.1	29.2	27	25.1	5.31131
813500	17.7	25.6	21.7	21.6667	3.95011
814000	20.5	35.5	28	28	7.5
814500	11	23.8	15.7	16.8333	6.47482
815000	15.4	27.9	20.6	21.3	6.27933
815500	20.5	32.9	25.1	26.1667	6.26844
816000	14.8	28.5	19.8	21.0333	6.93277
816500	15.1	30.6	20.5	22.0667	7.86787
817000	9.6	30.7	21.1	20.4667	10.5642
817500	17.1	24.9	18.8	20.2667	4.10163
818000	11	16.4	16.4	14.6	3.11769
818500	12.4	23.1	17.8	17.7667	5.35008
819000	10.7	20.9	13.3	14.9667	5.30031
819500	19.5	29.2	22.5	23.7333	4.96622
820000	22.9	36.5	27.9	29.1	6.87895
820500	23.4	48.8	31.2	34.4667	13.0113
821000	13.6	27.2	13.6	18.1333	7.85196
821500	15.8	33.7	19.4	22.9667	9.46802
822000	6.3	24.7	13.8	14.9333	9.25221
822500	14.1	22.6	17.2	17.9667	4.30155
823000	14.6	27.5	21	21.0333	6.45006
823500	15.8	22.7	18.9	19.1333	3.45591
824000	18.5	29.6	25.8	24.6333	5.64122
824500	14.3	19	14.3	15.8667	2.71355
825000	14	21	15.7	16.9	3.65103
825500	16.5	24.9	19.8	20.4	4.23202
826000	17.5	40.8	27.2	28.5	11.7043
826500	11.8	20.7	17.3	16.6	4.4911
827000	6.7	15.9	10.1	10.9	4.65188
827500	14.2	30.5	16.8	20.5	8.75728
828000	12.6	29.9	16.4	19.6333	9.09194
828500	14.9	34.5	24.3	24.5667	9.80272
829000	10	21.7	15.1	15.6	5.866
829500	9.7	17.8	11.3	12.9333	4.28991
830000	12.7	23.5	18.2	18.1333	5.40031
830500	12.8	38.5	20.1	23.8	13.2435
831000	13.7	29.9	18.1	20.5667	8.37695
831500	15.5	34.5	18.3	22.7667	10.2574
832000	7	23.8	11.9	14.2333	8.63964
832500	15.7	29.5	19.9	21.7	7.0739
833000	9.3	27.9	20.4	19.2	9.35788
833500	11.2	14.9	11.6	12.5667	2.0306
834000	13.4	26.9	21.1	20.4667	6.77225
834500	24	33.7	30.7	29.4667	4.96622
835000	10.8	18.1	16.2	15.0333	3.78726
835500	13.4	29.2	22.6	21.7333	7.93557
836000	15.5	19.4	17.5	17.4667	1.95021
836500	11.9	24.2	17.8	17.9667	6.15169
837000	13.4	42.2	25.6	27.0667	14.4559
837500	8.3	19.5	15.6	14.4667	5.68536
838000	19.1	30.6	24.9	24.8667	5.75007
838500	21.4	37	23.4	27.2667	8.48842
839000	15.1	26.6	18.5	20.0667	5.9079
839500	17.3	28.9	23.1	23.1	5.8
840000	14.7	25.9	20	20.2	5.60268
840500	8.7	17.5	14	13.4	4.43058
841000	21.1	30.5	26.6	26.0667	4.72264
841500	11.4	19	15.2	15.2	3.8
842000	19.1	28.7	26.8	24.8667	5.08363
842500	12.5	13.6	14.7	13.6	1.1
843000	11.6	19.1	18.1	16.2667	4.07226
843500	18.1	31.3	27.9	25.7667	6.85371
844000	18.6	28.2	24.8	23.8667	4.86758
844500	13.2	16.9	15.1	15.0667	1.85023
845000	17	24.2	19.9	20.3667	3.62261
845500	16.3	27.8	25.9	23.3333	6.16468
846000	25	39.4	30.4	31.6	7.27461
846500	16.8	22.3	20.4	19.8333	2.79344
847000	16.9	31.3	23.4	23.8667	7.21133
847500	10.7	19.3	14.3	14.7667	4.31895
848000	12.2	26.9	16.7	18.6	7.53193
848500	8.6	20.7	13.8	14.3667	6.06987
849000	10.3	18.4	17.2	15.3	4.3715
849500	11	33.8	19.5	21.4333	11.5223
850000	11	20.9	15.5	15.8	4.95681
850500	13.2	34	20.8	22.6667	10.5249
851000	14.1	28.1	17.6	19.9333	7.28583
851500	9.7	31	13.5	18.0667	11.3606
852000	12.6	20.5	18.6	17.2333	4.12351
852500	17.4	30.1	26	24.5	6.48151
853000	12.6	19.5	14.6	15.5667	3.55012
853500	7.7	17.9	14.7	13.4333	5.21664
854000	10.3	22.4	17.2	16.6333	6.06987
854500	15.4	28.2	20.5	21.3667	6.44386
855000	22.1	40.2	27.2	29.8333	9.33292
855500	11.2	29.7	14.8	18.5667	9.80833
856000	18.3	28.6	22	22.9667	5.2176
856500	14.1	21.9	17.2	17.7333	3.92726
857000	13.1	22.8	16	17.3	4.97896
857500	16.4	32.5	21.2	23.3667	8.26579
858000	13.5	27.8	22.2	21.1667	7.20578
858500	11.2	21.1	19.2	17.1667	5.25389
859000	7.2	12.9	8.6	9.56667	2.97041
859500	8.9	22.8	11.4	14.3667	7.40968
860000	13.6	25.3	19.4	19.4333	5.85007
860500	15	29.5	19.6	21.3667	7.40968
861000	12.7	30.2	20	20.9667	8.78996
861500	9.6	24.4	12.3	15.4333	7.88184
862000	8.5	17.1	13.7	13.1	4.33128
862500	9.8	27.4	15.7	17.6333	8.95786
863000	14.4	21	18	17.8	3.30454
863500	16.6	33.2	29.5	26.4333	8.71455
864000	14.3	36.2	22.9	24.4667	11.0337
864500	18.4	28.9	21.7	23	5.36936
865000	18	27	23.4	22.8	4.5299
865500	21	44.2	30.8	32	11.6465
866000	13.3	31.3	25.1	23.2333	9.14403
866500	9.3	21.7	17.8	16.2667	6.34061
867000	16.8	35.5	26.1	26.1333	9.35004
867500	14	23.9	17.5	18.4667	5.02029
868000	17.5	27.2	21.4	22.0333	4.88092
868500	14.7	26.2	18	19.6333	5.92143
869000	14.4	26	16.7	19.0333	6.14193
869500	10.1	26	15.2	17.1	8.1185
870000	13.5	36.8	24.5	24.9333	11.656
870500	13.1	31.9	24.8	23.2667	9.49333
871000	11.2	17.9	12.8	13.9667	3.49905
871500	9.3	21.8	11.8	14.3	6.61438
872000	12.2	22.6	18.3	17.7	5.2259
872500	16	24.9	17.8	19.5667	4.70567
873000	21.9	25.6	23.8	23.7667	1.85023
873500	19.9	32.6	23.5	25.3333	6.54548
874000	11.3	24.3	12.9	16.1667	7.08896
874500	13.2	20.9	13.2	15.7667	4.4456
875000	15.2	24	20.6	19.9333	4.43772
875500	12.9	21.2	16.1	16.7333	4.18609
876000	7	15.9	12.4	11.7667	4.48367
876500	5	13.5	9.9	9.46667	4.26654
877000	13.2	33.4	24.8	23.8	10.1371
877500	7.9	19.8	15.8	14.5	6.05558
878000	18.2	35	25.2	26.1333	8.4388
878500	11	27.4	14.6	17.6667	8.61936
879000	13.9	26.5	18	19.4667	6.42677
879500	8.8	19.5	12.5	13.6	5.43415
880000	11.4	24.8	19	18.4	6.72012
880500	12	18.4	14.4	14.9333	3.23316
881000	8.7	25.4	17.5	17.2	8.35404
881500	27.5	42.9	38.5	36.3	7.93221
882000	8.1	25.3	12.1	15.1667	9.00074
882500	17	34.5	20.4	23.9667	9.27919
883000	13.1	19.7	19.7	17.5	3.81051
883500	13.3	26.8	19.5	19.8667	6.75747
884000	8.3	20.8	11.5	13.5333	6.49333
884500	13.5	27.6	18.6	19.9	7.13933
885000	12.7	24.3	16.4	17.8	5.92537
885500	8.8	17	11.3	12.3667	4.20278
886000	10.3	23	13.3	15.5333	6.63802
886500	10.8	23.6	16.1	16.8333	6.43143
887000	17.6	36.6	21.1	25.1	10.1119
887500	15.7	28.3	18.9	20.9667	6.5493
888000	24.1	40.7	31.4	32.0667	8.32006
888500	11.1	22.1	18.5	17.2333	5.60833
889000	11.2	26	22.3	19.8333	7.70216
889500	12.4	29.3	21.3	21	8.45399
890000	19.5	26.6	23	23.0333	3.55012
890500	16.6	40.2	24.1	26.9667	12.0583
891000	13.5	28.2	16.9	19.5333	7.69567
891500	17.8	37.6	27.7	27.7	9.9
892000	9.8	28.7	19.7	19.4	9.45357
892500	9.2	17.9	14.5	13.8667	4.38444
893000	16.8	20.4	17.9	18.3667	1.84481
893500	17.8	21.3	21.3	20.1333	2.02073
894000	17.3	19	19	18.4333	0.981495
894500	11.1	18.5	16.6	15.4	3.84318
895000	11.8	25.3	20.6	19.2333	6.85298
895500	14.5	24.6	22.8	20.6333	5.38733
896000	15	22.6	18.8	18.8	3.8
896500	6.4	17.3	11.5	11.7333	5.45374
897000	15.8	21.6	19.8	19.0667	2.96873
897500	16.4	25.4	17.6	19.8	4.88672
898000	13.9	34.7	16.9	21.8333	11.2434
898500	13.4	24.8	19.1	19.1	5.7
899000	12.4	27.9	19.7	20	7.75435
899500	11.7	23.3	17.5	17.5	5.8
900000	16	26.5	21.6	21.3667	5.25389
900500	15.5	24.3	17.2	19	4.66798
901000	9	16.3	10.9	12.0667	3.78726
901500	10.4	21.5	17.2	16.3667	5.59673
902000	15.4	25	17.3	19.2333	5.08363
902500	16	26.2	18.9	20.3667	5.25579
903000	10.5	16.4	13.5	13.4667	2.95014
903500	6.7	15.2	10.7	10.8667	4.25245
904000	13.4	13.9	13.6	13.6333	0.251661
904500	11.7	29	21.9	20.8667	8.69617
905000	7.9	31.5	18.3	19.2333	11.8277
905500	10.3	26	16.8	17.7	7.8886
906000	9	33.7	14.9	19.2	12.8992
906500	11	26.9	21.8	19.9	8.1185
907000	6	24	21	17	9.64365
907500	15.4	25.1	21.5	20.6667	4.9034
908000	14.7	22	20.2	18.9667	3.80307
908500	20.3	28	26.1	24.8	4.01123
909000	13	20.1	17.9	17	3.63456
909500	13.4	22.9	19.1	18.4667	4.78156
910000	12.7	23.6	18.2	18.1667	5.45008
910500	20.4	25.9	24.1	23.4667	2.80416
911000	11.7	22.9	19.4	18	5.72975
911500	15.6	23.3	21.5	20.1333	4.02782
912000	4.8	18.9	13.8	12.5	7.13933
912500	8.2	19.7	17.2	15.0333	6.04842
913000	8.6	22.5	17.6	16.2333	7.05006
913500	7.5	16.6	12.1	12.0667	4.55009
914000	11.7	23.4	17.5	17.5333	5.85007
914500	15.4	28.8	19.2	21.1333	6.90604
915000	11.8	19.2	14.8	15.2667	3.72201
915500	11.8	15.7	15.7	14.4	2.25167
916000	17.9	30.7	20.9	23.1667	6.69428
916500	10.4	19	12.1	13.8333	4.55448
917000	13.9	31.2	22.5	22.5333	8.65005
917500	13.6	27	18	19.5333	6.83032
918000	10	19.1	17.4	15.5	4.83839
918500	10.9	23.5	18.3	17.5667	6.33193
919000	10.4	24.3	15.6	16.7667	7.02306
919500	11.7	24.4	19.8	18.6333	6.42988
920000	18	32.4	27	25.8	7.27461
920500	10.9	25.5	20	18.8	7.3736
921000	11.7	23.7	18.3	17.9	6.00999
921500	10.9	15	11.2	12.3667	2.28546
922000	13.4	31.5	22.4	22.4333	9.05005
922500	14.7	23.9	22.1	20.2333	4.87579
923000	16.5	41.8	32.3	30.2	12.7801
923500	14.6	38.5	29.7	27.6	12.0876
924000	9	15.4	10.8	11.7333	3.30051
924500	7	13.5	11.2	10.5667	3.29596
925000	9.5	18	15	14.1667	4.31084
925500	13.1	26.6	21.2	20.3	6.79485
926000	10.4	19	14.3	14.5667	4.3062
926500	17.3	30	25.1	24.1333	6.40495
927000	7.7	23.1	17.2	16	7.76981
927500	11.4	27	15.2	17.8667	8.1347
928000	11.6	25.1	17.4	18.0333	6.77225
928500	17.5	33.2	22.7	24.4667	7.99771
929000	13	24.4	14.6	17.3333	6.17198
929500	8.1	26.2	16.8	17.0333	9.05226
930000	5.3	14.4	10.5	10.0667	4.56545
930500	18.1	26.2	23	22.4333	4.07962
931000	17.8	28.8	21.4	22.6667	5.60833
931500	10.7	33.9	16.8	20.4667	12.0268
932000	4.9	15.6	8.4	9.63333	5.45558
932500	9.1	33.6	20.8	21.1667	12.2541
933000	12	22.4	16.8	17.0667	5.20513
933500	11.6	26.5	25.6	21.2333	8.35484
934000	11.8	21.9	15.2	16.3	5.13907
934500	11.6	18.6	16.1	15.4333	3.5473
935000	10.9	26.7	16.3	17.9667	8.03077
935500	14.8	29.6	22.2	22.2	7.4
936000	7.4	19.9	13.6	13.6333	6.25007
936500	9	16.9	12.2	12.7	3.97366
937000	11.3	25.2	15	17.1667	7.19884
937500	13.4	28.4	20.8	20.8667	7.50022
938000	14.5	23.5	21.7	19.9	4.76235
938500	14.8	26.4	14.8	18.6667	6.69726
939000	8.1	20	12.9	13.6667	5.98693
939500	8.6	17.1	13.7	13.1333	4.27824
940000	16.9	24	22.2	21.0333	3.69098
940500	9.2	19.8	17.2	15.4	5.52449
941000	7.3	12.8	7.3	9.13333	3.17543
941500	14.6	22.4	17.6	18.2	3.93446
942000	10.4	21.7	13.8	15.3	5.79741
942500	17.2	29.2	22.3	22.9	6.02246
943000	20.2	32.1	28.7	27	6.12944
943500	14.6	30.2	22.7	22.5	7.80192
944000	13.7	23.4	17.6	18.2333	4.88092
944500	11.5	21	19.1	17.2	5.02693
945000	4.3	20.3	18.5	14.3667	8.76432
945500	10.8	34.1	24.6	23.1667	11.7159
946000	18.4	28.8	23.5	23.5667	5.20032
946500	12.8	24.6	18.5	18.6333	5.90113
947000	9.1	22.3	12.8	14.7333	6.80906
947500	13.1	24	17.2	18.1	5.50545
948000	8.6	16.8	13	12.8	4.10366
948500	11.3	24.4	19.7	18.4667	6.63652
949000	21.9	34.7	23.8	26.8	6.90724
949500	9.5	22.8	11.4	14.5667	7.19328
950000	9	15.2	14.3	12.8333	3.35012
950500	11.7	24.7	14.5	16.9667	6.84203
951000	9.6	27	17.3	17.9667	8.71914
951500	16.8	21.5	19.9	19.4	2.38956
952000	17.1	25.7	20.6	21.1333	4.32474
952500	10.1	18.1	13.6	13.9333	4.0104
953000	7.2	13.6	8.7	9.83333	3.34714
953500	13.3	27.2	23.5	21.3333	7.19884
954000	9.7	25.1	14.3	16.3667	7.90527
954500	9.5	12.6	11	11.0333	1.55027
955000	8.8	21.9	14.2	14.9667	6.58357
955500	7.3	18.2	12.9	12.8	5.45069
956000	9.6	13	9.8	10.8	1.90788
956500	9.8	24.1	18	17.3	7.17565
957000	12.7	25.7	20.6	19.6667	6.55006
957500	14.2	25.5	21.9	20.5333	5.77264
958000	7.4	25.8	16.6	16.6	9.2
958500	23.1	37.6	26.5	29.0667	7.5831
959000	8.6	17.3	12.1	12.6667	4.37759
959500	22.1	43.3	28.2	31.2	10.9138
960000	14.1	31.6	27.9	24.5333	9.22298
960500	7.7	15.4	11.6	11.5667	3.85011
961000	15.4	25.7	18.8	19.9667	5.24817
961500	9	14.5	10.8	11.4333	2.80416
962000	11.8	31.4	17.5	20.2333	10.0818
962500	11	32.4	21.9	21.7667	10.7006
963000	11.8	19	16.9	15.9	3.7027
963500	22.5	34.7	25.1	27.4333	6.42599
964000	15.1	37.2	26.4	26.2333	11.0509
964500	11.3	23.3	16.2	16.9333	6.03352
965000	10.7	15.2	14.3	13.4	2.38118
965500	10.9	20.4	16.3	15.8667	4.7648
966000	9.3	26.2	17.8	17.7667	8.45005
966500	14.6	25.5	20	20.0333	5.45008
967000	6.9	15.3	9.6	10.6	4.28836
967500	3.5	21.6	16.2	13.7667	9.29211
968000	6.3	18	12.2	12.1667	5.85007
968500	12.8	27.5	23.9	21.4	7.66225
969000	4.8	16.2	8.2	9.73333	5.85263
969500	9.4	18.8	11.3	13.1667	4.97024
970000	20.8	29.5	22.6	24.3	4.59239
970500	9.8	28.1	18.7	18.8667	9.15114
971000	18.5	25.9	25.9	23.4333	4.27239
971500	12.7	24.9	16.4	18	6.2554
972000	9.9	31.5	11.6	17.6667	12.0101
972500	6.9	24.8	11.4	14.3667	9.31146
973000	6.1	18.9	12	12.3333	6.40651
973500	16.1	25.3	19.6	20.3333	4.64363
974000	17.8	26.9	21.4	22.0333	4.58294
974500	18.5	28.6	23.2	23.4333	5.05404
975000	9.8	16.4	9.8	12	3.81051
975500	11.6	13.9	11.6	12.3667	1.32791
976000	8.3	25.1	13.3	15.5667	8.62632
976500	11.5	24.2	20.4	18.7	6.51844
977000	11.9	31.3	15.8	19.6667	10.2617
977500	10.2	31	14.1	18.4333	11.0564
978000	6.6	16	10.7	11.1	4.71275
978500	10.2	23.9	15.4	16.5	6.91592
979000	9.2	18.3	14.7	14.0667	4.58294
979500	10.1	15.2	11.8	12.3667	2.59679
980000	13.9	21.3	15.5	16.9	3.89358
980500	9.7	16.1	14.4	13.4	3.31512
981000	12.8	27.2	17.6	19.2	7.33212
981500	10.7	18	13.1	13.9333	3.72066
982000	10.9	18.2	16.4	15.1667	3.80307
982500	11.7	23.4	11.7	15.6	6.755
983000	5.8	12.8	7.6	8.73333	3.63501
983500	8.8	12.1	11.7	10.8667	1.80093
984000	14	26.6	20.2	20.2667	6.30026
984500	7.7	17.2	12.4	12.4333	4.75009
985000	7.1	16	10.6	11.2333	4.48367
985500	12.3	27.1	21.6	20.3333	7.48086
986000	11.9	21.1	17.3	16.7667	4.62313
986500	10.5	17.1	16.5	14.7	3.64966
987000	7.8	13.7	7.8	9.76667	3.40637
987500	13.1	29.7	23.7	22.1667	8.40555
988000	5.3	22.2	12.5	13.3333	8.48076
988500	7	32.2	20.6	19.9333	12.6132
989000	1.5	26.3	11	12.9333	12.5125
989500	8.2	27.3	21.6	19.0333	9.80527
990000	18.8	35.7	22.6	25.7	8.86623
990500	11.4	39.4	24.4	25.0667	14.0119
991000	10	25.8	18.2	18	7.9019
991500	8.6	27.7	22.2	19.5	9.83209
992000	19.7	33	27.8	26.8333	6.70249
992500	11.8	28.7	21.9	20.8	8.50353
993000	15.3	25.1	21.3	20.5667	4.94099
993500	12.6	28.8	18	19.8	8.24864
994000	12.9	19.8	16.8	16.5	3.45977
994500	4.2	11.9	4.2	6.76667	4.4456
995000	10.2	27.5	16.1	17.9333	8.79451
995500	7.6	29.7	17.8	18.3667	11.0609
996000	7.8	25.6	15.3	16.2333	8.93663
996500	8.2	18.1	12.5	12.9333	4.96421
997000	18.9	31	25.8	25.2333	6.06987
997500	13.5	21.2	17.4	17.3667	3.85011
998000	18.6	27.1	22	22.5667	4.27824
998500	14.2	30.7	17.7	20.8667	8.69387
999000	13.1	27.5	21.6	20.7333	7.23901
999500	10.8	21.9	18.3	17	5.66304
1000000	8.6	24.1	20.7	17.8	8.14678
1000500	6.9	17.2	13.4	12.5	5.20865
1001000	8.1	23.1	16.8	16	7.53193
1001500	10.1	24.6	13.2	15.9667	7.63566
1002000	7	31.3	23.5	20.6	12.4069
1002500	4.7	13.7	10.3	9.56667	4.54459

## Sheet: methyleugenol-pb1B
	GC-SSR responses to methyleugenol
T[ms]	F[Hz]	F[Hz]	F[Hz]	Average	SD
150000	5.6	13	16.7	11.7667	5.65184
150500	5.3	18.6	30.5	18.1333	12.6065
151000	6.9	18.8	28.3	18	10.7224
151500	5.2	10.5	22.7	12.8	8.97385
152000	5.6	15	27	15.8667	10.7263
152500	4.8	17.2	30.9	17.6333	13.0554
153000	1.8	12.9	18.4	11.0333	8.45596
153500	3.7	14.9	21.6	13.4	9.04378
154000	3.8	7.4	9.2	6.8	2.74955
154500	5	18.9	25.7	16.5333	10.551
155000	5.1	15.3	23	14.4667	8.97905
155500	5.6	21.2	30.1	18.9667	12.4017
156000	5.3	19.6	24.5	16.4667	9.97614
156500	11.5	21.6	27.1	20.0667	7.91223
157000	5	18.8	22.6	15.4667	9.26139
157500	6.1	17.4	23.5	15.6667	8.82855
158000	4.8	16.9	24.5	15.4	9.93529
158500	2.7	12.2	22.6	12.5	9.95339
159000	6.7	13.5	19.2	13.1333	6.25806
159500	5.1	20.9	31.3	19.1	13.1924
160000	5.9	22.1	30.2	19.4	12.373
160500	7.4	12.2	17.3	12.3	4.95076
161000	7.7	15.4	24	15.7	8.15414
161500	7	13	20.7	13.5667	6.86756
162000	5.6	12.9	19.5	12.6667	6.95294
162500	6.4	8.3	25.6	13.4333	10.5794
163000	3.9	15.5	31.3	16.9	13.7535
163500	4.1	15.8	24.6	14.8333	10.2841
164000	8.6	15.3	17	13.6333	4.4411
164500	8.6	23	31.4	21	11.5308
165000	3.8	18.9	30.3	17.6667	13.293
165500	1.7	12.2	18.3	10.7333	8.39663
166000	2.8	13.4	21.1	12.4333	9.18822
166500	4	20.2	29.1	17.7667	12.7257
167000	1.8	16.6	22.2	13.5333	10.5401
167500	5.6	19.2	25.2	16.6667	10.0426
168000	4.9	11.4	13.2	9.83333	4.36616
168500	8.9	14.8	20.8	14.8333	5.95007
169000	5.9	14.2	26.7	15.6	10.4704
169500	3.5	22.1	31.6	19.0667	14.2935
170000	5.6	15.4	27.5	16.1667	10.9701
170500	8.5	19.8	28.7	19	10.1237
171000	4	15.4	21.2	13.5333	8.75062
171500	2.8	20.6	26.2	16.5333	12.2186
172000	7.4	17.9	22.3	15.8667	7.65528
172500	5.8	14	16.8	12.2	5.71664
173000	4.3	11.4	17.1	10.9333	6.41275
173500	8.9	18.2	22.6	16.5667	6.99452
174000	5.4	17.1	28.6	17.0333	11.6001
174500	9.9	16	24.6	16.8333	7.38535
175000	3.2	10.3	23.5	12.3333	10.3016
175500	5.4	18.4	20.5	14.7667	8.17945
176000	6.7	15.8	17.6	13.3667	5.84323
176500	2.4	16.9	20.3	13.2	9.50631
177000	8	17.1	29	18.0333	10.5311
177500	7.8	18.2	26.3	17.4333	9.2738
178000	5.9	17	23.8	15.5667	9.03567
178500	4.5	13.1	18.7	12.1	7.15262
179000	8.8	22	25.4	18.7333	8.76888
179500	6.7	20.7	25.8	17.7333	9.88956
180000	5.8	15.6	19.1	13.5	6.8942
180500	5.5	15.7	19.4	13.5333	7.19884
181000	6.7	17.9	26	16.8667	9.69141
181500	6.9	17.6	21.1	15.2	7.39797
182000	4.8	11.1	16.7	10.8667	5.95343
182500	6.9	12.8	22.7	14.1333	7.98394
183000	4.4	12.3	27.7	14.8	11.8495
183500	3.4	5.5	12.9	7.26667	4.99032
184000	4.5	17.6	26.5	16.2	11.0666
184500	4.7	15.2	17.6	12.5	6.86076
185000	6.9	19.2	25.6	17.2333	9.50386
185500	8.3	14.4	24	15.5667	7.91475
186000	3.4	14	15.7	11.0333	6.66508
186500	3.4	14.3	19.7	12.4667	8.30321
187000	7.3	22.9	25.9	18.7	9.98599
187500	4	12.7	19.8	12.1667	7.91349
188000	6.9	22.9	32.4	20.7333	12.8873
188500	3.3	9.3	14.1	8.9	5.4111
189000	2	12.8	22.2	12.3333	10.1081
189500	8.2	22.5	29.4	20.0333	10.8131
190000	2.5	19	26.1	15.8667	12.108
190500	2.3	18.1	24.7	15.0333	11.5106
191000	6.7	13.3	16.7	12.2333	5.08462
191500	6.5	17.7	21.2	15.1333	7.67876
192000	7.9	20	34.5	20.8	13.318
192500	5.3	16.4	14.8	12.1667	6.00028
193000	4.7	18.2	18.2	13.7	7.79423
193500	6.9	15.1	20.7	14.2333	6.9407
194000	4.6	15.2	22.8	14.2	9.14112
194500	4.8	8.2	19	10.6667	7.4144
195000	11.5	14.7	16.8	14.3333	2.66896
195500	5.4	17.7	24.2	15.7667	9.54795
196000	1.9	10.6	26.2	12.9	12.3122
196500	5.9	25	32.7	21.2	13.7982
197000	5.6	19.2	25.2	16.6667	10.0426
197500	4.9	11.4	13.2	9.83333	4.36616
198000	8.9	14.8	20.8	14.8333	5.95007
198500	5.9	14.2	26.7	15.6	10.4704
199000	3.5	22.1	31.6	19.0667	14.2935
199500	5.6	15.4	27.5	16.1667	10.9701
200000	8.5	19.8	28.7	19	10.1237
200500	4	15.4	21.2	13.5333	8.75062
201000	2.8	20.6	26.2	16.5333	12.2186
201500	7.4	17.9	22.3	15.8667	7.65528
202000	5.8	14	16.8	12.2	5.71664
202500	4.3	11.4	17.1	10.9333	6.41275
203000	8.9	18.2	22.6	16.5667	6.99452
203500	5.4	17.1	28.6	17.0333	11.6001
204000	9.9	16	24.6	16.8333	7.38535
204500	3.2	10.3	23.5	12.3333	10.3016
205000	5.4	18.4	20.5	14.7667	8.17945
205500	6.7	15.8	17.6	13.3667	5.84323
206000	2.4	16.9	20.3	13.2	9.50631
206500	8	17.1	29	18.0333	10.5311
207000	7.8	18.2	26.3	17.4333	9.2738
207500	5.9	17	23.8	15.5667	9.03567
208000	4.5	13.1	18.7	12.1	7.15262
208500	8.8	22	25.4	18.7333	8.76888
209000	6.7	20.7	25.8	17.7333	9.88956
209500	5.8	15.6	19.1	13.5	6.8942
210000	5.5	15.7	19.4	13.5333	7.19884
210500	6.7	17.9	26	16.8667	9.69141
211000	6.9	17.6	21.1	15.2	7.39797
211500	4.8	11.1	16.7	10.8667	5.95343
212000	6.9	12.8	22.7	14.1333	7.98394
212500	4.4	12.3	27.7	14.8	11.8495
213000	3.4	5.5	12.9	7.26667	4.99032
213500	4.5	17.6	26.5	16.2	11.0666
214000	4.7	15.2	17.6	12.5	6.86076
214500	6.9	19.2	25.6	17.2333	9.50386
215000	8.3	14.4	24	15.5667	7.91475
215500	3.4	14	15.7	11.0333	6.66508
216000	3.4	14.3	19.7	12.4667	8.30321
216500	7.3	22.9	25.9	18.7	9.98599
217000	4	12.7	19.8	12.1667	7.91349
217500	6.9	22.9	32.4	20.7333	12.8873
218000	3.3	9.3	14.1	8.9	5.4111
218500	2	6.5	10.5	6.33333	4.25245
219000	6.6	13.2	22.2	14	7.83071
219500	4.3	6	16.1	8.8	6.37887
220000	1.4	4.2	11.3	5.63333	5.10327
220500	1.6	4.5	8.3	4.8	3.36006
221000	0.6	2.2	5.7	2.83333	2.60832
221500	0.6	2.7	12.1	5.13333	6.124
222000	0.4	3.4	8.3	4.03333	3.9879
222500	0.3	4.9	14.7	6.63333	7.35482
223000	0.3	2.9	14.3	5.83333	7.4467
223500	0.3	2.9	11.2	4.8	5.69298
224000	0.3	3.3	7	3.53333	3.35609
224500	0.3	8	18.5	8.93333	9.13583
225000	0.3	14.1	22	12.1333	10.9829
225500	1.5	10.7	18.1	10.1	8.31625
226000	2.5	8.3	27.6	12.8	13.1412
226500	7.4	14.7	23.8	15.3	8.21645
227000	1.6	9.2	15.2	8.66667	6.81567
227500	0.9	4.9	15.5	7.1	7.54453
228000	1.8	8.9	20.7	10.4667	9.5469
228500	1.6	4.9	20.9	9.13333	10.323
229000	1.1	4.3	14.6	6.66667	7.05431
229500	2.4	7.6	25.6	11.8667	12.1743
230000	3.1	12.3	15.8	10.4	6.55973
230500	5.5	15	19.3	13.2667	7.0614
231000	2.9	13.8	21.4	12.7	9.29892
231500	1.1	2.8	11.1	5	5.3507
232000	1.6	4.4	10.4	5.46667	4.49592
232500	5.5	12.3	26.8	14.8667	10.8795
233000	3.2	11.4	22.3	12.3	9.58175
233500	2.4	14.5	21.8	12.9	9.79847
234000	2.9	14.2	24.9	14	11.0014
234500	1.8	10.7	22.2	11.5667	10.2276
235000	1.5	11.1	15.9	9.5	7.33212
235500	4.3	14.4	21.6	13.4333	8.69042
236000	5.8	17.4	17.7	13.6333	6.78552
236500	1.6	9.3	16.3	9.06667	7.35278
237000	0.9	13.6	30.4	14.9667	14.7974
237500	3.7	21	32.3	19	14.4045
238000	8.7	18.5	34.5	20.5667	13.0236
238500	14	23.5	29.8	22.4333	7.95383
239000	6.1	13	23.9	14.3333	8.97459
239500	3.6	16.1	28.6	16.1	12.5
240000	4	13.1	27.3	14.8	11.7427
240500	5	13	17.5	11.8333	6.33114
241000	7.7	23.2	34.6	21.8333	13.502
241500	3.5	16.1	21.1	13.5667	9.06936
242000	4.4	10.2	11.1	8.56667	3.63639
242500	3.7	15.2	19.7	12.8667	8.25126
243000	7	18.8	25.1	16.9667	9.18822
243500	5.9	13.3	17.6	12.2667	5.91805
244000	5.8	11.5	12.3	9.86667	3.54448
244500	8.2	16.9	23.6	16.2333	7.72161
245000	10.1	14.5	21.7	15.4333	5.85605
245500	5.3	10.6	14.2	10.0333	4.47698
246000	5.1	16.2	15.3	12.2	6.16523
246500	7.8	20.4	22.1	16.7667	7.81174
247000	2.3	14.5	20.7	12.5	9.36162
247500	2.9	10.8	14.7	9.46667	6.01193
248000	2.9	9.3	15.2	9.13333	6.15169
248500	8.5	21.8	30.3	20.2	10.9877
249000	7.5	20.7	29.4	19.2	11.0268
249500	9.6	13.9	13.9	12.4667	2.48261
250000	4.5	23.2	26.3	18	11.7936
250500	2	10.1	26.2	12.7667	12.3184
251000	5.3	11	23.8	13.3667	9.47435
251500	4.9	18.7	22.4	15.3333	9.22298
252000	9.1	14.1	14.5	12.5667	3.00888
252500	5.1	9.2	14.6	9.63333	4.7648
253000	4.9	11	23.8	13.2333	9.6459
253500	6.9	12.6	18.9	12.8	6.0025
254000	6.4	20.3	23.5	16.7333	9.09084
254500	1.5	8.5	20	10	9.34077
255000	1	4.5	12.7	6.06667	6.00528
255500	3.2	14.9	18.2	12.1	7.88226
256000	3.9	17.6	23.5	15	10.0553
256500	8.6	22.3	26	18.9667	9.16642
257000	4.4	10.9	18.7	11.3333	7.15984
257500	2.5	15.9	23	13.8	10.4101
258000	5.1	17.8	16.4	13.1	6.96348
258500	5.4	18.7	27.5	17.2	11.1261
259000	10.3	19	20.7	16.6667	5.57883
259500	3.6	9.4	17.5	10.1667	6.98164
260000	6.3	15.7	17.8	13.2667	6.124
260500	7.1	29.9	27.8	21.6	12.6012
261000	8.8	19.4	27.1	18.4333	9.18822
261500	9.1	15.1	16.9	13.7	4.08412
262000	3.8	12.8	13.3	9.96667	5.34634
262500	2.2	15.3	19.9	12.4667	9.18386
263000	3.3	15.2	20.9	13.1333	8.98016
263500	8.1	22.2	38.8	23.0333	15.367
264000	5.3	19.3	19.3	14.6333	8.0829
264500	4.5	16.5	16.5	12.5	6.9282
265000	7.3	14.6	20	13.9667	6.37364
265500	6.8	18.6	28.8	18.0667	11.0097
266000	4.9	15.1	24.3	14.7667	9.70429
266500	1.3	13.7	17.2	10.7333	8.35484
267000	2.1	11.5	13.1	8.9	5.94306
267500	2.1	10.2	18.8	10.3667	8.35125
268000	4.2	18.2	23.8	15.4	10.0955
268500	5.5	19.2	30.6	18.4333	12.5676
269000	4.3	17.3	24.5	15.3667	10.2378
269500	4.1	18.6	25.9	16.2	11.0964
270000	2.6	10.1	16.3	9.66667	6.86027
270500	1.3	11	19.5	10.6	9.10659
271000	2.2	17.5	32.2	17.3	15.001
271500	3.3	17.2	21	13.8333	9.3179
272000	8.2	12.7	15.5	12.1333	3.68284
272500	10.2	31.4	38.3	26.6333	14.6439
273000	8.5	11.3	18.9	12.9	5.38145
273500	5.2	12.8	22.1	13.3667	8.46424
274000	2	14.1	18.3	11.4667	8.46306
274500	3.3	9.9	18.1	10.4333	7.4144
275000	4.4	10.7	18.4	11.1667	7.01166
275500	4.7	20.4	24.3	16.4667	10.3751
276000	2.8	19	24.7	15.5	11.3618
276500	6.2	11.3	14.6	10.7	4.23202
277000	5.9	11.9	17	11.6	5.55608
277500	2.5	12.7	19.6	11.6	8.60291
278000	2.2	20.4	24.1	15.5667	11.7228
278500	2	12.3	16.2	10.1667	7.33644
279000	3.2	7	9.2	6.46667	3.03535
279500	4.3	10.1	18.5	10.9667	7.13956
280000	5.3	21.1	32.7	19.7	13.7535
280500	7.8	20.9	27.9	18.8667	10.2031
281000	5.6	23.4	23.4	17.4667	10.2768
281500	3	15.6	21.4	13.3333	9.40709
282000	5.7	8.3	20.1	11.3667	7.6742
282500	2.8	11.9	18.7	11.1333	7.97768
283000	2.3	12.9	21.8	12.3333	9.76234
283500	2.5	16.4	25.1	14.6667	11.3993
284000	4.4	22.4	31.9	19.5667	13.9672
284500	4.2	17.3	26	15.8333	10.9738
285000	4	11.2	12.8	9.33333	4.68757
285500	8.5	23.7	23.7	18.6333	8.77572
286000	3.3	15	18.8	12.3667	8.07857
286500	1.4	13	16.8	10.4	8.02247
287000	2.2	12.2	16.3	10.2333	7.25282
287500	2.9	15.2	19	12.3667	8.41566
288000	4.3	22	29.8	18.7	13.0664
288500	6.3	21.6	29.6	19.1667	11.8391
289000	4.6	11.4	14.7	10.2333	5.15008
289500	4.3	19.3	24.6	16.0667	10.5292
290000	1.7	17	22.1	13.6	10.6165
290500	0.9	12.3	15.4	9.53333	7.63566
291000	2.5	16.6	25.8	14.9667	11.7356
291500	2.5	21.5	28.1	17.3667	13.2911
292000	1.4	11.4	22.8	11.8667	10.7076
292500	1.8	14.6	19.6	12	9.18041
293000	5.7	15.7	20.9	14.1	7.72528
293500	3.5	16.5	23.1	14.3667	9.97263
294000	2	14.9	26.7	14.5333	12.3541
294500	1.1	13.4	20.9	11.8	9.9965
295000	2	14.2	18.5	11.5667	8.5594
295500	2.4	10.2	12	8.2	5.10294
296000	3.2	17.1	17.1	12.4667	8.02517
296500	1.5	14.5	19.3	11.7667	9.20942
297000	3.2	13.6	24.3	13.7	10.5504
297500	2.5	14.7	22	13.0667	9.85207
298000	6.2	19.1	21.1	15.4667	8.08723
298500	3.5	15.6	21.6	13.5667	9.21973
299000	1.5	14.7	26.9	14.3667	12.7033
299500	2.5	9	16.3	9.26667	6.90386
300000	1.5	12	15.4	9.63333	7.24592
300500	4.5	19.6	25	16.3667	10.6256
301000	5.2	27.4	29.2	20.6	13.3671
301500	1.3	13.9	20.1	11.7667	9.57984
302000	4.1	17.7	19.5	13.7667	8.41982
302500	13	17	17	15.6667	2.3094
303000	3.2	16.1	23.2	14.1667	10.1392
303500	2	11.3	13.2	8.83333	5.99361
304000	3.4	17.3	23.1	14.6	10.1237
304500	4.6	8.9	16.3	9.93333	5.91805
305000	3.7	5.8	14.3	7.93333	5.61278
305500	5.5	18.5	25.4	16.4667	10.1046
306000	4.2	10.9	17.4	10.8333	6.60025
306500	5.3	17.6	21.2	14.7	8.33727
307000	6	24	27.1	19.0333	11.3931
307500	2.7	13	24.1	13.2667	10.7025
308000	3.8	10.9	10.9	8.53333	4.09919
308500	10.9	23.5	23.5	19.3	7.27461
309000	5.8	18.5	26.8	17.0333	10.5765
309500	3.1	14.4	21.2	12.9	9.14276
310000	1.3	13	16.8	10.3667	8.07857
310500	1.2	23.5	31	18.5667	15.5004
311000	1	5.9	10.4	5.76667	4.70142
311500	3.6	13.9	19.9	12.4667	8.24399
312000	5.3	23.4	27	18.5667	11.6294
312500	2.8	16.8	19.9	13.1667	9.11062
313000	5.4	14.4	24	14.6	9.30161
313500	3.7	12.2	18.5	11.4667	7.4272
314000	8.8	20.5	26.1	18.4667	8.82742
314500	4.3	21.1	22.7	16.0333	10.1928
315000	3.8	14.2	20.4	12.8	8.38809
315500	3	22.1	33.2	19.4333	15.2756
316000	3.4	16.4	21.9	13.9	9.5
316500	4.1	17.2	17.2	12.8333	7.56329
317000	6.2	19.8	26.4	17.4667	10.3002
317500	7.2	13	17.1	12.4333	4.97427
318000	5.4	15.9	19.4	13.5667	7.28583
318500	4.3	12.8	15.6	10.9	5.88473
319000	3.4	12.1	15.3	10.2667	6.15819
319500	6.3	14.2	24.4	14.9667	9.07432
320000	7.9	18.1	25.8	17.2667	8.97905
320500	8.5	18.4	27.6	18.1667	9.55214
321000	5.2	19.2	28.2	17.5333	11.5902
321500	4	19.5	21.4	14.9667	9.54481
322000	4.2	13.6	25.4	14.4	10.6226
322500	13.4	17.2	28.5	19.7	7.8543
323000	5	14.1	25.3	14.8	10.1681
323500	11.1	28.8	34.2	24.7	12.0835
324000	6.4	9.7	16.1	10.7333	4.93187
324500	4.2	18.9	21.5	14.8667	9.32863
325000	1.2	16	22.8	13.3333	11.0442
325500	3.8	21.2	32.9	19.3	14.6427
326000	3	16.4	23.7	14.3667	10.4987
326500	5.6	18	19.6	14.4	7.6629
327000	4.2	18.8	30	17.6667	12.9373
327500	4.8	21.7	28.3	18.2667	12.1204
328000	3.7	15.8	22.1	13.8667	9.35111
328500	3.3	8.8	17.7	9.93333	7.26659
329000	3.9	12.9	16.6	11.1333	6.53172
329500	3.1	11	18.1	10.7333	7.50355
330000	4.4	9.1	12.1	8.53333	3.88115
330500	2.7	13.3	20.4	12.1333	8.90749
331000	3.5	19.3	29.9	17.5667	13.2851
331500	3.8	17.8	27.9	16.5	12.1025
332000	7.1	19.5	19.5	15.3667	7.15914
332500	4.4	19.3	22.5	15.4	9.65971
333000	2.5	14.6	21.9	13	9.79847
333500	5.8	12.8	20.3	12.9667	7.25144
334000	5.5	8.3	17.6	10.4667	6.3343
334500	9.8	16.8	19	15.2	4.80416
335000	4.4	13.6	26.2	14.7333	10.9441
335500	4.1	14.5	24.2	14.2667	10.052
336000	14.3	18	12.5	14.9333	2.80416
336500	4.8	10.8	14	9.86667	4.67047
337000	5.2	16.2	21.6	14.3333	8.35783
337500	10.2	25.1	28.7	21.3333	9.80833
338000	5.7	14.7	25.7	15.3667	10.0167
338500	2.5	11.5	17.5	10.5	7.54983
339000	1.1	12.9	22.6	12.2	10.7671
339500	2.4	15.5	24.2	14.0333	10.9738
340000	3.8	9	16.1	9.63333	6.17441
340500	7.7	22.8	31.7	20.7333	12.1327
341000	9.5	18.2	17.8	15.1667	4.91155
341500	9.3	22.2	23.9	18.4667	7.98394
342000	8	21.1	26.3	18.4667	9.42992
342500	3	20.2	22.1	15.1	10.5219
343000	1.2	13.3	17.1	10.5333	8.30321
343500	4.4	19	25.4	16.2667	10.7635
344000	3.7	13.6	14.7	10.6667	6.05833
344500	1.8	10.9	18.2	10.3	8.21645
345000	7.7	20.3	24.4	17.4667	8.70306
345500	7	17.6	24.6	16.4	8.86115
346000	5.4	19.8	30.7	18.6333	12.6903
346500	4.8	15.6	25.8	15.4	10.5014
347000	1.6	9.3	14.5	8.46667	6.49025
347500	6.3	22	27.8	18.7	11.1234
348000	4.8	21.4	33.4	19.8667	14.3615
348500	9.2	24.6	26.3	20.0333	9.42037
349000	4.6	11.1	14.7	10.1333	5.11892
349500	5.4	22.2	30.3	19.3	12.7008
350000	7.7	23.7	37.6	23	14.9623
350500	9.3	15.9	21.2	15.4667	5.96182
351000	4.8	13.6	13.3	10.5667	4.99633
351500	3.4	18.1	23.6	15.0333	10.4433
352000	8.7	20.6	25.9	18.4	8.80852
352500	5.3	15.7	21.4	14.1333	8.16354
353000	7.6	18.6	23.7	16.6333	8.2282
353500	4.8	17.3	18.5	13.5333	7.58705
354000	2	10.5	16.4	9.63333	7.23901
354500	4.1	13.5	15.2	10.9333	5.97857
355000	9.9	24.8	24.8	19.8333	8.60252
355500	3.7	16.6	24	14.7667	10.2734
356000	7.5	15	26	16.1667	9.30502
356500	4.2	11.2	14.8	10.0667	5.39011
357000	2.1	18.2	27.4	15.9	12.8059
357500	4.3	15	20.5	13.2667	8.23792
358000	2	18.3	23.8	14.7	11.3371
358500	2.3	19.3	21.1	14.2333	10.3737
359000	2.2	15.7	24.2	14.0333	11.0943
359500	2.7	15.6	19	12.4333	8.59903
360000	4.5	21.1	23	16.2	10.1769
360500	8.5	15.3	20	14.6	5.78187
361000	3.4	14.3	22.6	13.4333	9.6293
361500	1.8	13.7	19.9	11.8	9.19837
362000	1.2	12.1	15.7	9.66667	7.55006
362500	1.8	13.6	19.4	11.6	8.96883
363000	2.6	21.9	27.4	17.3	13.0242
363500	4.9	13.5	20.2	12.8667	7.66964
364000	4.3	19.4	26.5	16.7333	11.3377
364500	2.9	17.7	22.1	14.2333	10.0585
365000	2.2	11.5	16.9	10.2	7.43572
365500	4	11.7	24.4	13.3667	10.3016
366000	3.1	14.6	23.1	13.6	10.0374
366500	5.5	11	23.4	13.3	9.16897
367000	7.5	26.4	32.7	22.2	13.1145
367500	7.4	18.5	35.1	20.3333	13.9407
368000	6.4	13.4	21.8	13.8667	7.7106
368500	3.2	11.7	19.6	11.5	8.20183
369000	4.2	15.2	24	14.4667	9.92035
369500	4.7	17.4	22.6	14.9	9.20815
370000	5.3	15.6	19.5	13.4667	7.33644
370500	2.9	18	30.6	17.1667	13.8688
371000	5.4	19.2	27.9	17.5	11.3459
371500	5.5	13.4	16.4	11.7667	5.63057
372000	5.6	22.3	27.9	18.6	11.6013
372500	3.5	19.6	32.1	18.4	14.3377
373000	1.2	13.6	19.5	11.4333	9.34041
373500	6.5	31.3	35.2	24.3333	15.5667
374000	5.7	21.4	21.4	16.1667	9.0644
374500	6.4	19.8	27	17.7333	10.4543
375000	5.2	19.5	27.2	17.3	11.1638
375500	2.2	8.2	11.9	7.43333	4.89524
376000	1.6	14.8	27.9	14.7667	13.15
376500	1.1	15.6	25.1	13.9333	12.0865
377000	2.4	17	22.6	14	10.4288
377500	12.3	22.4	32.2	22.3	9.95038
378000	3.2	14.5	21.5	13.0667	9.23381
378500	1.3	12.6	23.5	12.4667	11.1006
379000	2.9	19.8	31.6	18.1	14.4253
379500	3.4	10.3	19.2	10.9667	7.92107
380000	3.5	13.2	14.6	10.4333	6.04511
380500	5.2	16.8	17.5	13.1667	6.90821
381000	7.1	15.6	22.9	15.2	7.90759
381500	3.9	17.6	32.6	18.0333	14.3549
382000	2.5	10.6	23	12.0333	10.3249
382500	2.6	7.1	10.7	6.8	4.05832
383000	6.4	27.8	33	22.4	14.0982
383500	8.6	21.3	29.9	19.9333	10.7156
384000	3.8	17.3	23.1	14.7333	9.90269
384500	1.5	12.3	16.9	10.2333	7.90527
385000	4.5	16.8	17.1	12.8	7.18958
385500	4.1	18.6	21.4	14.7	9.28601
386000	1.3	20.1	26.7	16.0333	13.1793
386500	5.4	23.6	27.5	18.8333	11.7959
387000	5.8	10.4	15.7	10.6333	4.95412
387500	4.7	22.6	29.6	18.9667	12.8415
388000	5.6	22	23.9	17.1667	10.062
388500	2.8	19.5	24.8	15.7	11.4817
389000	9	18.5	20.4	15.9667	6.10765
389500	6.7	21.9	37.7	22.1	15.501
390000	2.1	11.2	18.7	10.6667	8.31284
390500	2.9	17.5	28	16.1333	12.6057
391000	7.1	21.9	27.4	18.8	10.499
391500	3.1	17.5	29.1	16.5667	13.0251
392000	0.9	17.3	23.6	13.9333	11.7185
392500	0.9	5.8	11	5.9	5.05074
393000	2.5	19	28.2	16.5667	13.0216
393500	3.3	17	26.4	15.5667	11.6165
394000	2.4	13.7	18.8	11.6333	8.39305
394500	5.9	18.3	23.3	15.8333	8.95842
395000	6.9	20.7	25.1	17.5667	9.49596
395500	2.4	17.2	23	14.2	10.6226
396000	2.2	19.5	28.4	16.7	13.3225
396500	6.9	13.8	16.9	12.5333	5.11892
397000	4.5	14.7	21.2	13.4667	8.41804
397500	3.4	14.6	20.1	12.7	8.51058
398000	1.4	10.3	23.5	11.7333	11.1195
398500	3.4	13.9	23.6	13.6333	10.1026
399000	1.8	10.2	20.9	10.9667	9.57305
399500	1.6	5.3	15.2	7.36667	7.0316
400000	6.4	24.6	28.3	19.7667	11.7228
400500	2.7	14.9	16.7	11.4333	7.61665
401000	1.6	13.4	19.2	11.4	8.96883
401500	2.3	13.5	21.5	12.4333	9.64434
402000	2.6	17.1	23.8	14.5	10.8365
402500	2.6	12	19	11.2	8.22922
403000	2.9	13.6	23.4	13.3	10.2533
403500	5.2	16.3	23.6	15.0333	9.26517
404000	8.7	25.2	29.3	21.0667	10.9043
404500	5.3	16.5	25.7	15.8333	10.2163
405000	5.6	12.7	20	12.7667	7.20023
405500	4.7	14.1	26.2	15	10.7782
406000	3.4	9.1	17.3	9.93333	6.98737
406500	3	6.8	9.7	6.5	3.36006
407000	3	21.1	24.3	16.1333	11.4858
407500	3.6	19.4	26.4	16.4667	11.6796
408000	5.2	14.2	18.6	12.6667	6.83032
408500	3.8	17.1	26.6	15.8333	11.4527
409000	2.1	12.2	19.4	11.2333	8.69042
409500	4.3	8.5	15.9	9.56667	5.8731
410000	3	12.2	20.8	12	8.90169
410500	0.9	14.9	23.9	13.2333	11.5902
411000	1.3	9.9	15	8.73333	6.92411
411500	3.7	13.5	24.3	13.8333	10.304
412000	2	8.8	14	8.26667	6.01775
412500	1.8	18.8	27	15.8667	12.8535
413000	6.5	22	30.7	19.7333	12.2582
413500	3.1	7.6	19.2	9.96667	8.30682
414000	4	9.1	22.6	11.9	9.61093
414500	3.8	15.2	30.5	16.5	13.3974
415000	8.2	25.6	31.6	21.8	12.154
415500	8.5	17	24.6	16.7	8.05419
416000	4.1	10.8	18.1	11	7.00214
416500	4.3	11.1	20.5	11.9667	8.1347
417000	5.1	14.5	19.7	13.1	7.4
417500	2.6	11.8	16.3	10.2333	6.98307
418000	3.4	10.9	17.7	10.6667	7.15285
418500	6.4	20.2	27.6	18.0667	10.7598
419000	5.2	15.9	17.2	12.7667	6.58508
419500	5.3	10.6	19.4	11.7667	7.12203
420000	6.3	11.9	13.4	10.5333	3.7421
420500	2.7	15.7	23.9	14.1	10.6902
421000	3.9	15.9	23.6	14.4667	9.92791
421500	4.7	22.1	25.8	17.5333	11.2669
422000	1.6	13.2	26.4	13.7333	12.4086
422500	3.4	13	14.2	10.2	5.91946
423000	4.2	8.8	15.9	9.63333	5.89435
423500	6.9	15.9	21.7	14.8333	7.45743
424000	5	16.8	20.2	14	7.97747
424500	2.8	14	21	12.6	9.18041
425000	7.8	21.9	21.9	17.2	8.14064
425500	6.7	27.2	33	22.3	13.8177
426000	4.9	18	19.7	14.2	8.09877
426500	3.1	12.9	16.1	10.7	6.77348
427000	3.1	21	27.9	17.3333	12.8001
427500	1.7	11.1	20.3	11.0333	9.30018
428000	4	18.1	24.2	15.4333	10.3607
428500	6.4	14.6	19.5	13.5	6.61891
429000	3.3	9.3	15.8	9.46667	6.25167
429500	2.8	9.6	20.9	11.1	9.14276
430000	6.2	26	32.8	21.6667	13.8193
430500	2.4	10.9	18.4	10.5667	8.00521
431000	6.2	12.3	14.8	11.1	4.4238
431500	2.8	19.1	26.1	16	11.9553
432000	6.3	15.4	23.4	15.0333	8.55589
432500	6.2	17.2	26.7	16.7	10.2591
433000	6	12.7	21.2	13.3	7.61774
433500	4.1	10.2	16.1	10.1333	6.00028
434000	1.7	11	23	11.9	10.6785
434500	3.6	16.7	25.8	15.3667	11.1599
435000	5.7	13	16.3	11.6667	5.42433
435500	8.6	21.5	27.4	19.1667	9.61475
436000	3.9	24.9	32.6	20.4667	14.8547
436500	6.6	20	36.4	21	14.9251
437000	5.9	14.9	21.2	14	7.6896
437500	5.4	15.2	16.9	12.5	6.20725
438000	9.4	20.2	25.8	18.4667	8.33627
438500	7.3	17.1	25.1	16.5	8.91516
439000	10.8	18.2	21.8	16.9333	5.60833
439500	7.6	17.8	19.6	15	6.47148
440000	5.9	18.1	22.8	15.6	8.72296
440500	10.9	22.3	26	19.7333	7.87041
441000	7.4	20.5	18.6	15.5	7.07884
441500	5.3	15.7	17.5	12.8333	6.58584
442000	9.9	23.7	29.6	21.0667	10.1106
442500	5.3	10.9	26	14.0667	10.7072
443000	5.5	17.2	24.7	15.8	9.67626
443500	10.2	19.4	19.4	16.3333	5.31162
444000	5.3	16.6	18.2	13.3667	7.0316
444500	4.9	14.6	29.2	16.2333	12.2321
445000	2.1	6.7	12	6.93333	4.95412
445500	4.9	20.1	25.1	16.7	10.5205
446000	8.5	15.9	22.4	15.6	6.95485
446500	3.6	9	10.3	7.63333	3.55293
447000	2.4	14.6	21	12.6667	9.44951
447500	7.4	24.3	33.9	21.8667	13.4165
448000	6.3	19	20.6	15.3	7.83518
448500	7.9	14.2	11.4	11.1667	3.15647
449000	7.9	14.4	22	14.7667	7.05715
449500	3.7	8.9	19.3	10.6333	7.94313
450000	1.8	10.6	17.8	10.0667	8.01332
450500	0.9	12	22.3	11.7333	10.7025
451000	1.7	16.2	25.3	14.4	11.9025
451500	8.6	15.7	14.1	12.8	3.72424
452000	7.3	14.6	16.5	12.8	4.85695
452500	7.1	29	30.8	22.3	13.1943
453000	4.4	9.7	15.3	9.8	5.45069
453500	3.1	14.8	20.4	12.7667	8.82742
454000	1.2	10.7	16.7	9.53333	7.81558
454500	3.6	18.1	25.3	15.6667	11.0528
455000	6.6	22.5	30	19.7	11.9486
455500	5	18.7	32.4	18.7	13.7
456000	6.6	17.1	21.6	15.1	7.6974
456500	3	16.3	18	12.4333	8.21361
457000	5	17	24.5	15.5	9.83616
457500	5.6	16.8	23.5	15.3	9.04378
458000	3.2	12.8	20.7	12.2333	8.76375
458500	5.8	16.1	28.7	16.8667	11.4692
459000	6.8	14.2	23.3	14.7667	8.26458
459500	6.9	21.5	27.3	18.5667	10.5116
460000	5.6	11.3	12.7	9.86667	3.76076
460500	6.3	11.1	17.3	11.5667	5.51483
461000	10.6	15.7	20.9	15.7333	5.15008
461500	4.7	18.9	31.3	18.3	13.3101
462000	7.9	13	20	13.6333	6.07481
462500	5.3	9.3	13.4	9.33333	4.0501
463000	7.3	16.7	21.7	15.2333	7.31118
463500	4.6	11.1	19.4	11.7	7.41822
464000	1.6	6.8	12.9	7.1	5.65597
464500	1.8	13.4	25.2	13.4667	11.7001
465000	6.2	12.7	25.5	14.8	9.81988
465500	2.5	6.6	9.6	6.23333	3.56417
466000	3	8.5	12.5	8	4.7697
466500	2.6	13.9	26.9	14.4667	12.1599
467000	2	14.4	27.5	14.6333	12.7516
467500	5.2	14.4	20.9	13.5	7.8886
468000	2.3	13.2	20.7	12.0667	9.25221
468500	4.4	14.5	14.8	11.2333	5.91974
469000	1.4	14.3	23	12.9	10.8678
469500	1	6.3	15.6	7.63333	7.39076
470000	4.1	18.9	22	15	9.56609
470500	3.6	12.6	21.6	12.6	9
471000	4.9	17.2	27.5	16.5333	11.3147
471500	10.1	20.7	26.1	18.9667	8.13962
472000	2.4	12.9	22.1	12.4667	9.85715
472500	4.1	15.8	16.9	12.2667	7.09389
473000	7.3	23.8	31.1	20.7333	12.1928
473500	2.8	12.8	18.2	11.2667	7.81366
474000	2.9	10.1	18.6	10.5333	7.85897
474500	7.8	22.4	24.2	18.1333	8.99407
475000	4.8	17.1	24.7	15.5333	10.0421
475500	1.8	9.1	15.6	8.83333	6.90386
476000	1.4	7.4	17.7	8.83333	8.24399
476500	2.5	13	18.5	11.3333	8.12917
477000	9.2	17.5	29.2	18.6333	10.0481
477500	5.3	28.3	28.3	20.6333	13.2791
478000	3.3	13.4	19.2	11.9667	8.04632
478500	4.6	16.9	26.2	15.9	10.8347
479000	4.9	17.4	25.1	15.8	10.1946
479500	1.8	9.3	13	8.03333	5.70643
480000	3.4	13.6	15.2	10.7333	6.40104
480500	3	13.8	12.1	9.63333	5.80718
481000	5.9	10.5	13.6	10	3.87427
481500	2.9	12.2	25.3	13.4667	11.2536
482000	2.2	9.1	14.5	8.6	6.16523
482500	3.3	13.1	19.6	12	8.20549
483000	8.3	17.5	18.6	14.8	5.65597
483500	1.8	9.8	19.4	10.3333	8.81211
484000	2.1	16.8	27.9	15.6	12.9418
484500	4.8	11.6	15.9	10.7667	5.59673
485000	8.9	16.1	20.8	15.2667	5.99361
485500	6.5	13	14.7	11.4	4.32782
486000	3.8	12.7	24.3	13.6	10.2796
486500	1.6	7.5	17.3	8.8	7.93032
487000	3.6	16.6	26.9	15.7	11.676
487500	8.3	18	21.9	16.0667	7.00309
488000	6.1	15	21.6	14.2333	7.77839
488500	3.6	20	24	15.8667	10.8099
489000	5.2	24.3	35	21.5	15.096
489500	4	13	20.4	12.4667	8.213
490000	4	13.5	15.8	11.1	6.2554
490500	1.7	12	19.2	10.9667	8.79564
491000	3.7	14.5	27.2	15.1333	11.7628
491500	2.6	15.8	20.5	12.9667	9.28027
492000	4.8	14.8	18.1	12.5667	6.92556
492500	5.7	15.8	21.2	14.2333	7.86787
493000	6.4	10.4	13.8	10.2	3.70405
493500	3.6	25.1	27.9	18.8667	13.2952
494000	3.5	13.9	17.8	11.7333	7.39211
494500	2.8	14.6	21.9	13.1	9.63795
495000	3.7	22	23.9	16.5333	11.1545
495500	3.7	17.3	21.5	14.1667	9.30448
496000	4.3	14.1	21.9	13.4333	8.81892
496500	8.4	16.3	24.1	16.2667	7.85005
497000	4.2	14.6	23.8	14.2	9.80612
497500	2.4	17.2	24.2	14.6	11.1301
498000	3.1	15.7	28.6	15.8	12.7503
498500	3.5	16.2	21.1	13.6	9.0835
499000	7.8	14.2	15.5	12.5	4.12189
499500	3.5	10.7	10.7	8.3	4.15692
500000	3.6	19.1	21	14.5667	9.54481
500500	2.9	16.4	23.8	14.3667	10.5973
501000	1.2	6.8	6.9	4.96667	3.26241
501500	3.6	10.4	15.6	9.86667	6.01775
502000	10.7	23.1	30.6	21.4667	10.05
502500	3.9	11.1	20.9	11.9667	8.53307
503000	5.8	10.4	22.6	12.9333	8.68178
503500	2.9	8.8	11.4	7.7	4.35546
504000	7.8	20.3	20.6	16.2333	7.30502
504500	3.6	19.8	21.8	15.0667	9.98065
505000	4.2	22	30	18.7333	13.2066
505500	2.7	14.5	19.9	12.3667	8.79621
506000	3.2	11.5	15.3	10	6.18789
506500	9.8	21.3	23	18.0333	7.18076
507000	4.4	18.9	23.3	15.5333	9.88956
507500	7.4	24.4	27.9	19.9	10.9659
508000	4.2	14.6	17.9	12.2333	7.15006
508500	6.5	19	23.4	16.3	8.76755
509000	4.3	19.2	25	16.1667	10.6782
509500	1.9	24	29.5	18.4667	14.6083
510000	1	3.6	9.1	4.56667	4.13562
510500	2.9	12.2	24.2	13.1	10.6785
511000	7.3	15.7	24.5	15.8333	8.60078
511500	7.5	13.6	22.2	14.4333	7.38535
512000	7.9	20	23.7	17.2	8.26378
512500	3	9.7	15.4	9.36667	6.20672
513000	1.1	7.8	12.4	7.1	5.68243
513500	0.8	16.2	20.6	12.5333	10.3968
514000	0.8	8.2	16.9	8.63333	8.05874
514500	1.8	7.9	19.6	9.76667	9.04563
515000	5.2	16.8	21.3	14.4333	8.30682
515500	7.8	11.7	19.9	13.1333	6.17603
516000	10.9	25.8	28.2	21.6333	9.37248
516500	5.4	22.8	32.3	20.1667	13.642
517000	4.1	12.2	20.8	12.3667	8.35125
517500	5.9	11.8	16.6	11.4333	5.35942
518000	1.9	17.2	24.8	14.6333	11.6638
518500	1.8	17.5	28.1	15.8	13.2322
519000	6.5	24.6	26.5	19.2	11.0395
519500	1.9	15.4	13.7	10.3333	7.35278
520000	1.1	20.3	25.8	15.7333	12.9678
520500	2.7	10.9	19.5	11.0333	8.40079
521000	8.2	18	22.9	16.3667	7.48487
521500	6.3	15.4	17.1	12.9333	5.80718
522000	3.5	21.2	27.8	17.5	12.5654
522500	5.6	13.7	15.4	11.5667	5.23673
523000	6.2	16.4	17.2	13.2667	6.13297
523500	5.2	15.3	20.4	13.6333	7.73585
524000	5.7	14.2	22.7	14.2	8.5
524500	10.5	16.9	19.8	15.7333	4.7585
525000	2.9	12.5	15.3	10.2333	6.50333
525500	6.7	14.6	15.1	12.1333	4.71204
526000	7.8	12	11	10.2667	2.19393
526500	2.5	11.5	23.1	12.3667	10.3273
527000	4	16.8	20.1	13.6333	8.50431
527500	1.7	12.5	16.6	10.2667	7.69697
528000	1	12.8	20.8	11.5333	9.96059
528500	3.4	12.5	19.1	11.6667	7.8831
529000	8.4	20.7	28.4	19.1667	10.0878
529500	3.1	19.1	20.8	14.3333	9.76542
530000	5	16.4	23.8	15.0667	9.47066
530500	5.3	10.9	12.7	9.63333	3.85919
531000	2.6	10.8	8.8	7.4	4.27551
531500	3.6	11.9	17.7	11.0667	7.08684
532000	1.5	11.6	23.7	12.2667	11.115
532500	2.4	12	15.4	9.93333	6.74191
533000	4.9	18.6	23.6	15.7	9.68143
533500	5	10.6	14.2	9.93333	4.63609
534000	3.4	13.3	21.6	12.7667	9.11171
534500	1.5	19.5	22.2	14.4	11.253
535000	1.7	9.3	16.7	9.23333	7.50022
535500	4	10.9	12.8	9.23333	4.63069
536000	2.7	11.5	17.1	10.4333	7.25902
536500	3.9	14.9	21.5	13.4333	8.89119
537000	4.9	16.5	26.3	15.9	10.7126
537500	2.1	12.9	22.2	12.4	10.0593
538000	3.2	11.8	20.4	11.8	8.6
538500	4.9	20.3	20.3	15.1667	8.89119
539000	1.1	11.6	11.6	8.1	6.06218
539500	3.1	14.5	22.4	13.3333	9.70275
540000	3.9	14.3	19	12.4	7.72722
540500	4.8	21.4	23.9	16.7	10.3812
541000	5.4	13.8	21.4	13.5333	8.00333
541500	3.5	9.3	19.5	10.7667	8.10021
542000	3.2	11.5	15.3	10	6.18789
542500	9.8	21.3	23	18.0333	7.18076
543000	4.4	18.9	23.3	15.5333	9.88956
543500	7.4	24.4	27.9	19.9	10.9659
544000	4.2	14.6	17.9	12.2333	7.15006
544500	6.5	19	23.4	16.3	8.76755
545000	4.3	19.2	25	16.1667	10.6782
545500	1.9	24	29.5	18.4667	14.6083
546000	1	3.6	9.1	4.56667	4.13562
546500	2.9	12.2	24.2	13.1	10.6785
547000	7.3	15.7	24.5	15.8333	8.60078
547500	7.5	13.6	22.2	14.4333	7.38535
548000	7.9	20	23.7	17.2	8.26378
548500	3	9.7	15.4	9.36667	6.20672
549000	1.1	7.8	12.4	7.1	5.68243
549500	0.8	16.2	20.6	12.5333	10.3968
550000	0.8	8.2	16.9	8.63333	8.05874
550500	1.8	7.9	19.6	9.76667	9.04563
551000	5.2	16.8	21.3	14.4333	8.30682
551500	7.8	11.7	19.9	13.1333	6.17603
552000	10.9	25.8	28.2	21.6333	9.37248
552500	5.4	22.8	32.3	20.1667	13.642
553000	4.1	12.2	20.8	12.3667	8.35125
553500	5.9	11.8	16.6	11.4333	5.35942
554000	1.9	17.2	24.8	14.6333	11.6638
554500	1.8	17.5	28.1	15.8	13.2322
555000	6.5	24.6	26.5	19.2	11.0395
555500	1.9	15.4	13.7	10.3333	7.35278
556000	1.1	20.3	25.8	15.7333	12.9678
556500	2.7	10.9	19.5	11.0333	8.40079
557000	8.2	18	22.9	16.3667	7.48487
557500	6.3	15.4	17.1	12.9333	5.80718
558000	3.5	21.2	27.8	17.5	12.5654
558500	5.6	13.7	15.4	11.5667	5.23673
559000	6.2	16.4	17.2	13.2667	6.13297
559500	5.2	15.3	20.4	13.6333	7.73585
560000	5.7	14.2	22.7	14.2	8.5
560500	10.5	16.9	19.8	15.7333	4.7585
561000	2.9	12.5	15.3	10.2333	6.50333
561500	6.7	14.6	15.1	12.1333	4.71204
562000	7.8	12	11	10.2667	2.19393
562500	2.5	11.5	23.1	12.3667	10.3273
563000	5.8	17.9	20.2	14.6333	7.73585
563500	8.1	19.3	21.6	16.3333	7.22242
564000	6.8	12.6	25.2	14.8667	9.40709
564500	6.1	9.3	10	8.46667	2.07926
565000	3.8	13.8	12	9.86667	5.33042
565500	3.3	15.9	26.6	15.2667	11.6629
566000	5.3	22.4	32.1	19.9333	13.5692
566500	6.4	8.3	13.4	9.36667	3.61985
567000	3.3	13.9	20	12.4	8.45044
567500	2.1	17.4	24.3	14.6	11.3618
568000	5.4	12.5	19.7	12.5333	7.15006
568500	7.7	14	19.3	13.6667	5.80718
569000	9.8	13.4	16.3	13.1667	3.25628
569500	3	11.4	13	9.13333	5.37153
570000	2.3	12.2	21.6	12.0333	9.65108
570500	5.4	11.8	21.5	12.9	8.10617
571000	6.3	18.5	24	16.2667	9.05888
571500	4.7	11.5	23.9	13.3667	9.73516
572000	3.1	11.7	17.2	10.6667	7.10657
572500	3.9	13	22.3	13.0667	9.20018
573000	6.5	21.7	21.7	16.6333	8.77572
573500	10	20.6	20	16.8667	5.95427
574000	6.9	17.1	24.3	16.1	8.743
574500	7	14.4	12.8	11.4	3.89358
575000	10.6	18.3	17	15.3	4.12189
575500	9.8	24.7	28.9	21.1333	10.0371
576000	6.4	10.1	19	11.8333	6.47637
576500	6.7	11.7	21	13.1333	7.25695
577000	6.5	17	22.7	15.4	8.21766
577500	5.9	22.9	29	19.2667	11.9709
578000	1.2	11	17.2	9.8	8.06722
578500	2.5	9.5	12.4	8.13333	5.08953
579000	5.6	14.9	27.9	16.1333	11.201
579500	1.8	12.9	18.1	10.9333	8.32606
580000	3.9	20	22.9	15.6	10.2357
580500	7.5	16.1	25.4	16.3333	8.95228
581000	10.2	24.1	22.5	18.9333	7.60548
581500	8.9	12.8	11.5	11.0667	1.98578
582000	5.9	12.2	15.6	11.2333	4.92172
582500	5	20.3	27.7	17.6667	11.5768
583000	7.6	19.1	28.2	18.3	10.3233
583500	3.6	15.3	18	12.3	7.65441
584000	7.4	18	18	14.4667	6.11991
584500	4.4	14.5	19.3	12.7333	7.60548
585000	4.1	17.9	22.8	14.9333	9.69656
585500	3.7	15.8	17.9	12.4667	7.66442
586000	4.6	13.2	18.4	12.0667	6.96946
586500	5.5	17.4	31.9	18.2667	13.2213
587000	7.8	18.7	24.3	16.9333	8.39067
587500	5.2	13.8	14.5	11.1667	5.17912
588000	6.7	21.3	26.6	18.2	10.3058
588500	7.2	19.3	28.8	18.4333	10.826
589000	7.3	18.7	15	13.6667	5.81578
589500	10.5	16.8	24.3	17.2	6.90869
590000	7.7	16.8	16.8	13.7667	5.25389
590500	6.8	8.7	12.2	9.23333	2.73922
591000	11.5	19.8	27.5	19.6	8.00187
591500	7.5	15	30	17.5	11.4564
592000	13.7	22	25.4	20.3667	6.01858
592500	7.2	16.8	19.6	14.5333	6.50333
593000	9.5	21.5	19.7	16.9	6.47148
593500	6.3	20.6	23.8	16.9	9.31826
594000	6.2	15.1	20.1	13.8	7.0406
594500	13.2	18.8	29	20.3333	8.01083
595000	4.7	13.3	21.6	13.2	8.45044
595500	8.3	15.1	19.8	14.4	5.78187
596000	6.5	19.6	25.4	17.1667	9.68211
596500	4.5	19.9	27.5	17.3	11.7184
597000	2.5	19	27.5	16.3333	12.7115
597500	4.4	23.9	34.2	20.8333	15.1348
598000	6.4	10.4	8.8	8.53333	2.01329
598500	9.3	20.6	20.6	16.8333	6.52406
599000	5.1	14.8	16.8	12.2333	6.25806
599500	6.6	16.4	23.5	15.5	8.48587
600000	6.7	12.1	17	11.9333	5.15202
600500	5	18.3	14.5	12.6	6.85055
601000	7.7	11.5	9	9.4	1.93132
601500	9.9	16.6	15	13.8333	3.49905
602000	4.8	15.2	18.3	12.7667	7.0713
602500	5.3	12.3	18	11.8667	6.36108
603000	7.6	21.8	21.8	17.0667	8.19837
603500	11.5	22.4	18.7	17.5333	5.54286
604000	2.6	16.9	24.4	14.6333	11.0753
604500	2.8	20.7	25.8	16.4333	12.079
605000	6.2	19.1	26	17.1	10.0504
605500	2.4	13.5	18.8	11.5667	8.36919
606000	6.2	18.5	22.2	15.6333	8.37636
606500	9.4	22.5	29.3	20.4	10.1148
607000	5	18.2	19.9	14.3667	8.15618
607500	3.1	10.8	14.5	9.46667	5.81578
608000	2.6	18.8	22.5	14.6333	10.5841
608500	8.8	17.7	22.5	16.3333	6.9515
609000	9	15.6	20.5	15.0333	5.7709
609500	17.8	29.2	35.1	27.3667	8.79451
610000	26.2	33.8	38.3	32.7667	6.11583
610500	32.2	39.8	46.7	39.5667	7.25282
611000	36	41.7	39.4	39.0333	2.86764
611500	42.4	48.3	46.3	45.6667	3.00056
612000	54.9	60.6	66.2	60.5667	5.65007
612500	52.9	57.1	61	57	4.05093
613000	57.1	61	69	62.3667	6.06658
613500	51.5	57.1	61	56.5333	4.77528
614000	53.8	59.5	61.7	58.3333	4.07717
614500	50	54.6	54.6	53.0667	2.65581
615000	50.8	56.5	59.2	55.5	4.28836
615500	50.5	58.1	62.1	56.9	5.89237
616000	39.5	45.7	45.7	43.6333	3.57957
616500	43.5	51	52.9	49.1333	4.97024
617000	36.1	41.8	45.7	41.2	4.82804
617500	33.9	37.7	37.7	36.4333	2.19393
618000	30	37.6	37.6	35.0667	4.38786
618500	30.4	36.1	36.1	34.2	3.2909
619000	33.1	39.7	41.7	38.1667	4.50037
619500	27	38.5	42.4	35.9667	8.00646
620000	30.4	33.8	32.1	32.1	1.7
620500	26.1	31.3	40.8	32.7333	7.45408
621000	26.7	33.9	37.6	32.7333	5.54286
621500	26.8	35.3	37.2	33.1	5.53805
622000	28.6	36.1	40	34.9	5.79396
622500	27.3	39.2	45	37.1667	9.02349
623000	21.9	29.2	41.5	30.8667	9.90572
623500	20.8	34.2	41.8	32.2667	10.6327
624000	14.8	24.2	29.7	22.9	7.53459
624500	20	30.6	37.7	29.4333	8.90749
625000	18	29.6	29.6	25.7333	6.69726
625500	16.6	26	26	22.8667	5.42709
626000	9.1	16.4	15.3	13.6	3.93573
626500	18.7	28.1	27.6	24.8	5.28867
627000	12.5	25.1	25.1	20.9	7.27461
627500	15.5	31	32.3	26.2667	9.34684
628000	13.8	24.6	32.2	23.5333	9.24626
628500	15.2	20	31	22.0667	8.10021
629000	17	26.5	34	25.8333	8.51959
629500	14.9	20.8	22.6	19.4333	4.02782
630000	14.1	23.5	21.7	19.7667	4.98932
630500	12	20.7	20.7	17.8	5.02295
631000	18.3	25.8	27.8	23.9667	5.00833
631500	15.6	21.5	26.8	21.3	5.60268
632000	15.4	29.1	30.8	25.1	8.44334
632500	14.9	26.6	29.4	23.6333	7.69177
633000	22.6	31.9	31.9	28.8	5.36936
633500	16.1	25.1	32.8	24.6667	8.35843
634000	11.9	17.7	19.5	16.3667	3.97157
634500	14.1	21.8	25.3	20.4	5.72975
635000	14.9	29.5	37.6	27.3333	11.5041
635500	12.5	24.8	26.7	21.3333	7.70865
636000	15.4	25.6	29.3	23.4333	7.19884
636500	16.2	23.5	23.5	21.0667	4.21466
637000	11.6	16.3	22.2	16.7	5.31131
637500	10.8	21.6	24.8	19.0667	7.33576
638000	14.9	19.8	18.2	17.6333	2.49867
638500	14.5	32.2	34.1	26.9333	10.8094
639000	8.6	20.7	24	17.7667	8.10823
639500	12.6	18	20.6	17.0667	4.08085
640000	9.8	14.9	14.9	13.2	2.94449
640500	12.7	25.1	25.1	20.9667	7.15914
641000	9.6	21.2	22.5	17.7667	7.10235
641500	10	18.9	18.9	15.9333	5.13842
642000	9.6	23.4	23.4	18.8	7.96743
642500	11.5	22.3	29.7	21.1667	9.15278
643000	13.2	27.5	25.8	22.1667	7.81174
643500	16	28.5	26.7	23.7333	6.75747
644000	10.6	25.3	29.2	21.7	9.80867
644500	9.5	21.2	24.4	18.3667	7.84368
645000	8.3	18.3	18.3	14.9667	5.7735
645500	8.8	15.2	19	14.3333	5.15493
646000	8.2	13.3	15.4	12.3	3.7027
646500	10.6	27.2	29.2	22.3333	10.2105
647000	9.7	21.1	21.1	17.3	6.58179
647500	11.6	21.1	28.1	20.2667	8.28151
648000	8.8	16.4	18.2	14.4667	4.98932
648500	14.9	18.2	23.3	18.8	4.23202
649000	10.6	15.2	30	18.6	10.1371
649500	12.3	23.1	30.2	21.8667	9.01351
650000	6.2	14	21	13.7333	7.4036
650500	9.9	14.2	16.7	13.6	3.43948
651000	10.2	18.7	31.3	20.0667	10.6162
651500	14.8	18.5	28.6	20.6333	7.14306
652000	7.2	14.4	26.2	15.9333	9.59236
652500	6.1	17.1	20.7	14.6333	7.60614
653000	6.6	21.7	19.8	16.0333	8.22456
653500	7.5	21.4	25	17.9667	9.24139
654000	7.5	19	29.5	18.6667	11.0038
654500	12.9	16.4	16.7	15.3333	2.11266
655000	5.8	9.6	7.7	7.7	1.9
655500	5.4	12.5	13.7	10.5333	4.4859
656000	6.6	13	17.1	12.2333	5.29182
656500	8.9	16	19.6	14.8333	5.44457
657000	9.9	17.6	33.2	20.2333	11.8711
657500	7.7	15.8	29.5	17.6667	11.0192
658000	8	22.4	31	20.4667	11.6212
658500	8.2	21.5	25.1	18.2667	8.90187
659000	3.7	10.1	14.9	9.56667	5.61902
659500	5.8	20	20.9	15.5667	8.47014
660000	6.6	16	17.4	13.3333	5.8731
660500	7.1	19.8	19.8	15.5667	7.33235
661000	8.4	14.3	20.6	14.4333	6.10109
661500	4.9	12	16.6	11.1667	5.89435
662000	4.4	24.4	30	19.6	13.4581
662500	6.8	17.6	25.4	16.6	9.34024
663000	6.5	17	20.5	14.6667	7.28583
663500	9.8	20	18.5	16.1	5.50727
664000	6.4	15.7	20.4	14.1667	7.12484
664500	7.6	17.8	24.3	16.5667	8.41804
665000	7.3	19.3	19.3	15.3	6.9282
665500	4.7	9.7	23.3	12.5667	9.62566
666000	7.6	12.7	13.2	11.1667	3.09892
666500	4.6	17.9	19.7	14.0667	8.24763
667000	5.9	18.4	28.7	17.6667	11.4177
667500	10.3	21.8	29.9	20.6667	9.84903
668000	6.1	29.6	41.5	25.7333	18.014
668500	6.5	16.9	20	14.4667	7.0713
669000	4	13.5	21.7	13.0667	8.85795
669500	5.5	16.1	26.1	15.9	10.3015
670000	5.2	14.9	20.4	13.5	7.6961
670500	6.1	18.3	17	13.8	6.7
671000	9.7	16.6	18.2	14.8333	4.517
671500	7.2	16.3	29	17.5	10.9494
672000	8.4	24	27.8	20.0667	10.2807
672500	8.9	18	21.6	16.1667	6.54548
673000	2.2	22.3	27.1	17.2	13.2102
673500	1.1	11	27.6	13.2333	13.3904
674000	4.6	15.6	25.7	15.3	10.5532
674500	12.9	20.8	25.9	19.8667	6.55006
675000	4.6	14.3	23	13.9667	9.20453
675500	6.7	15.2	22.5	14.8	7.90759
676000	8.6	14.4	18.7	13.9	5.06853
676500	6.6	16.8	16.8	13.4	5.88897
677000	4.3	14.3	22	13.5333	8.87487
677500	6.6	14.7	17.6	12.9667	5.70117
678000	8.5	19.3	25.1	17.6333	8.42457
678500	7.3	18.3	21.6	15.7333	7.48755
679000	3.6	16.4	16.4	12.1333	7.39008
679500	7.8	17.4	22.8	16	7.59737
680000	5.6	11.2	23	13.2667	8.88219
680500	11.3	22.7	28.4	20.8	8.70689
681000	11.4	19.5	15.6	15.5	4.05093
681500	4.9	12.9	14.7	10.8333	5.21664
682000	7.2	23.9	25.4	18.8333	10.1026
682500	7.1	18.4	25.8	17.1	9.41754
683000	7.6	17.9	19.9	15.1333	6.60025
683500	8.5	22.6	33.1	21.4	12.3438
684000	5.4	13	21.6	13.3333	8.10514
684500	5.7	15.9	19	13.5333	6.95869
685000	1.6	16.7	27.2	15.1667	12.8687
685500	4.5	19.8	27	17.1	11.4904
686000	14.7	25.8	27.6	22.7	6.98642
686500	7.7	25.4	30.4	21.1667	11.9274
687000	4.5	18.2	17.2	13.3	7.63741
687500	5.7	8.1	12.9	8.9	3.66606
688000	4.9	6.7	12	7.86667	3.69098
688500	9.2	18.6	27.1	18.3	8.95377
689000	12.8	21.9	21.6	18.7667	5.16946
689500	8.5	22.8	22.8	18.0333	8.25611
690000	4.1	22.1	26.7	17.6333	11.9438
690500	1.7	12.1	17.2	10.3333	7.89958
691000	6.4	19.7	33.9	20	13.7525
691500	7.5	9.3	18.7	11.8333	6.01443
692000	8.3	20.4	29.5	19.4	10.6353
692500	5.6	14	23	14.2	8.70172
693000	5.3	23.1	25.8	18.0667	11.1384
693500	4.5	10.5	24.7	13.2333	10.3737
694000	11	14.4	22	15.8	5.63205
694500	9.2	18.3	23.9	17.1333	7.41912
695000	7	17.5	27.2	17.2333	10.1026
695500	4.6	18.7	22.4	15.2333	9.39273
696000	5.8	15.2	15.2	12.0667	5.42709
696500	8.8	12.5	18.8	13.3667	5.05602
697000	7.6	27.3	29.2	21.3667	11.9601
697500	6.3	13.3	16.6	12.0667	5.25959
698000	11.6	19.6	24.2	18.4667	6.376
698500	4.8	14.7	20.2	13.2333	7.80406
699000	2.6	6.7	12.5	7.26667	4.97427
699500	6.5	18.8	22.2	15.8333	8.25974
700000	8.5	14.2	21.3	14.6667	6.41275
700500	7.7	15.3	22.6	15.2	7.4505
701000	6.7	10.2	12.5	9.8	2.92062
701500	2.1	7.6	13.4	7.7	5.65066
702000	3.7	19.2	21.7	14.8667	9.75107
702500	9.7	20.4	18.7	16.2667	5.75007
703000	8.6	17.2	17.2	14.3333	4.96521
703500	2.3	8.3	14.9	8.5	6.30238
704000	2.8	13	26.2	14	11.732
704500	8.6	17.1	20.6	15.4333	6.17117
705000	7.4	14.9	24.2	15.5	8.41606
705500	3.3	13	19	11.7667	7.92233
706000	2.8	11.5	19.5	11.2667	8.35244
706500	5	21.2	21.2	15.8	9.35307
707000	13.4	21.8	25.2	20.1333	6.07399
707500	4.1	11	26	13.7	11.1969
708000	3.6	11.4	19	11.3333	7.70022
708500	5.2	23.5	37.2	21.9667	16.055
709000	5.5	16.6	23.9	15.3333	9.26517
709500	5.9	12.4	13.3	10.5333	4.03774
710000	4	9.5	15.8	9.76667	5.90452
710500	5.9	18.9	20.7	15.1667	8.07548
711000	3.9	10.2	20.1	11.4	8.16639
711500	3.3	7.5	17.4	9.4	7.23948
712000	6.1	13.8	18	12.6333	6.03517
712500	2.9	10.1	18	10.3333	7.5527
713000	3.7	14.9	18.7	12.4333	7.79829
713500	7	14.2	26	15.7333	9.59236
714000	4.8	18.7	23.4	15.6333	9.67178
714500	7.7	25.8	33.7	22.4	13.3293
715000	7.3	12.8	13.1	11.0667	3.26548
715500	5	21.9	25.6	17.5	10.9823
716000	1.1	11.8	16.8	9.9	8.0206
716500	3.7	14	13	10.2333	5.68008
717000	7.7	15.4	17.9	13.6667	5.31633
717500	8.7	18.8	24.4	17.3	7.95676
718000	5	12.2	13.7	10.3	4.65081
718500	8.8	18	23.3	16.7	7.33689
719000	3.1	13.9	23.1	13.3667	10.0107
719500	5.3	16.8	26.1	16.0667	10.4194
720000	5.2	19	24.1	16.1	9.77804
720500	9.4	14.2	20.6	14.7333	5.61902
721000	6.8	14.8	17.5	13.0333	5.56447
721500	7.7	14.3	20.3	14.1	6.30238
722000	5.8	16.3	23.8	15.3	9.04157
722500	10.4	17.3	21.6	16.4333	5.65007
723000	6.3	14.1	17.6	12.6667	5.78475
723500	10.2	16.1	15.3	13.8667	3.20052
724000	7.2	11.5	15.3	11.3333	4.05257
724500	11.6	20.2	22	17.9333	5.55818
725000	3.1	12.4	17.4	10.9667	7.25695
725500	4.1	14.8	23	13.9667	9.47752
726000	4.8	9.6	20	11.4667	7.77003
726500	6.2	17.6	24.9	16.2333	9.42461
727000	6.9	18.2	21.3	15.4667	7.57914
727500	8.3	18.6	19.9	15.6	6.35531
728000	6.1	16.8	24.3	15.7333	9.14677
728500	7.4	17.2	30.6	18.4	11.6465
729000	16	27.5	36.6	26.7	10.3233
729500	7.6	19.9	25.4	17.6333	9.11391
730000	6.6	21.2	19.5	15.7667	7.98394
730500	5	14.4	21.6	13.6667	8.32426
731000	6.5	15.4	21.9	14.6	7.73111
731500	4.8	11.3	17.3	11.1333	6.25167
732000	6	13.9	21	13.6333	7.50355
732500	2.1	12.1	27	13.7333	12.5301
733000	4	13.3	25.8	14.3667	10.9391
733500	10.6	19.5	19.5	16.5333	5.13842
734000	8.8	12.9	14.7	12.1333	3.02379
734500	5.9	19.8	20.9	15.5333	8.36082
735000	7.7	29.9	42.4	26.6667	17.5745
735500	9.3	24.7	31.5	21.8333	11.3742
736000	9.6	34.8	34.8	26.4	14.5492
736500	13.9	33.3	29.6	25.6	10.3
737000	4.7	18.6	20.3	14.5333	8.55823
737500	7.8	31.3	33.3	24.1333	14.1804
738000	9.8	17.1	16.1	14.3333	3.95769
738500	5.4	20.3	29.6	18.4333	12.2075
739000	5.6	21.7	23.4	16.9	9.82293
739500	10.1	25.3	35.1	23.5	12.5968
740000	5.5	15	31.3	17.2667	13.0485
740500	6.9	12.8	21.8	13.8333	7.50355
741000	6.3	21.8	32.7	20.2667	13.2666
741500	8.3	25.9	30.8	21.6667	11.8323
742000	5.9	21.5	28.7	18.7	11.655
742500	10.9	25.5	37.6	24.6667	13.3695
743000	4.8	24.6	36.5	21.9667	16.0132
743500	2.5	11.2	26.5	13.4	12.1503
744000	10.1	22.1	20.4	17.5333	6.49333
744500	11.1	28.7	36	25.2667	12.8001
745000	2.8	16.7	24.1	14.5333	10.814
745500	6.6	21.2	24.4	17.4	9.48894
746000	7.6	29.4	33.1	23.3667	13.7791
746500	1.8	13.3	20.9	12	9.61613
747000	3.4	18.1	51.3	24.2667	24.5382
747500	5.1	17.5	37	19.8667	16.0811
748000	9.8	30.3	30.9	23.6667	12.0126
748500	7.9	27.3	28.2	21.1333	11.4692
749000	4.2	29.9	36	23.3667	16.8767
749500	1.3	9	14.8	8.36667	6.77225
750000	4.7	11.5	14.8	10.3333	5.15008
750500	10.9	14.9	30.5	18.7667	10.3563
751000	8.1	18.7	18.7	15.1667	6.11991
751500	3	19.8	26.4	16.4	12.0648
752000	3.2	11.8	13.1	9.36667	5.3799
752500	5.4	12	17.2	11.5333	5.91383
753000	4.4	14.7	17.9	12.3333	7.05431
753500	4.8	18.9	24.6	16.1	10.1926
754000	7.8	24.5	25.9	19.4	10.0703
754500	5	17.3	22	14.7667	8.77857
755000	2.7	9.5	14.6	8.93333	5.9702
755500	15.3	26.7	32.4	24.8	8.70689
756000	11.6	21.2	26.5	19.7667	7.5527
756500	4.5	11.8	13.5	9.93333	4.78156
757000	7.5	19.5	27.3	18.1	9.97397
757500	7.1	17.7	28.2	17.6667	10.55
758000	4.9	9.8	19.6	11.4333	7.48487
758500	3.6	14.1	23.3	13.6667	9.85715
759000	4.4	9.5	17.1	10.3333	6.39088
759500	6.1	15.3	13.6	11.6667	4.89524
760000	5.6	12.6	18.4	12.2	6.40937
760500	5.8	16.4	19.4	13.8667	7.14516
761000	3	12.9	23.9	13.2667	10.4548
761500	14.3	25.1	28.3	22.5667	7.33576
762000	5.2	19.1	22.5	15.6	9.1657
762500	7.6	14	12.8	11.4667	3.40196
763000	3.4	11.9	11.6	8.96667	4.82321
763500	4.1	13.5	15.9	11.1667	6.23645
764000	8.6	19.5	28.4	18.8333	9.91682
764500	11.5	16.8	20.9	16.4	4.71275
765000	7.2	15.1	16.9	13.0667	5.15978
765500	2.2	9.2	10.7	7.36667	4.53689
766000	5.3	9	18.2	10.8333	6.64254
766500	5.6	18.4	23.4	15.8	9.18041
767000	2.3	10.2	15.3	9.26667	6.55006
767500	7.2	21.1	18.9	15.7333	7.4715
768000	7	15.3	21.1	14.4667	7.08684
768500	4.7	18.9	21.7	15.1	9.11482
769000	8.3	19.4	24.7	17.4667	8.36919
769500	4.4	14.4	32.5	17.1	14.2432
770000	4.8	11.9	22.8	13.1667	9.06661
770500	9.7	20.9	24.3	18.3	7.63937
771000	5	12.5	17.2	11.5667	6.15332
771500	3	4.6	14.6	7.4	6.28649
772000	9.1	14.7	26.7	16.8333	8.99185
772500	8.5	12.5	21.5	14.1667	6.65833
773000	4.9	11.3	25	13.7333	10.2686
773500	5.8	12.9	27.6	15.4333	11.1186
774000	4	9.2	19.2	10.8	7.72528
774500	5.1	11.8	13.6	10.1667	4.47921
775000	6.5	14.6	17.5	12.8667	5.70117
775500	5.4	10.8	16.2	10.8	5.4
776000	5.9	13.7	20.6	13.4	7.35459
776500	3.7	8.8	17.9	10.1333	7.19328
777000	4.1	12.3	19.5	11.9667	7.70541
777500	6.9	21.5	25.4	17.9333	9.75209
778000	3.3	16.7	34.5	18.1667	15.6516
778500	3.2	11.7	13.7	9.53333	5.57524
779000	7.8	20	28.7	18.8333	10.4987
779500	5.2	18.7	32.1	18.6667	13.45
780000	5.1	19.5	29.2	17.9333	12.1261
780500	4.8	17.1	21.4	14.4333	8.6153
781000	2.3	23.5	31.9	19.2333	15.2543
781500	3.9	10.7	16.1	10.2333	6.11337
782000	5.9	21.6	21.6	16.3667	9.0644
782500	8.7	19.6	29.4	19.2333	10.3549
783000	9.7	18.1	19.9	15.9	5.44426
783500	6.9	18	19.8	14.9	6.98642
784000	2.2	11.2	27.2	13.5333	12.6623
784500	3.7	8.6	22.7	11.6667	9.86425
785000	4.2	14.3	25.3	14.6	10.5532
785500	4.9	21.4	28	18.1	11.8983
786000	9.1	20.1	27.4	18.8667	9.21213
786500	5.2	12.2	17.4	11.6	6.12209
787000	9.6	22.4	32.1	21.3667	11.2855
787500	5.2	20.4	24.2	16.6	10.0539
788000	5.4	15.3	22.6	14.4333	8.63269
788500	4.9	16.8	25.3	15.6667	10.2471
789000	13.8	24.5	29.1	22.4667	7.85005
789500	5	17.2	21	14.4	8.35943
790000	4.9	19.8	27	17.2333	11.2714
790500	4.3	14.2	14.2	10.9	5.71577
791000	4.7	11.1	11.4	9.06667	3.78462
791500	3.4	13.5	18.2	11.7	7.56241
792000	6.9	25.2	25.2	19.1	10.5655
792500	5.5	11.1	14.7	10.4333	4.63609
793000	5.1	16.6	21.2	14.3	8.29277
793500	6.1	15.1	15.1	12.1	5.19615
794000	8.3	16.6	22.3	15.7333	7.04012
794500	4.6	10.6	18.1	11.1	6.76387
795000	1.8	9.1	12.8	7.9	5.59732
795500	5.7	21.6	21.6	16.3	9.17987
796000	5.4	17.1	21.7	14.7333	8.40377
796500	7.3	18.5	17.4	14.4	6.17333
797000	4.6	13.8	18.9	12.4333	7.2473
797500	2.1	17.9	25.8	15.2667	12.0674
798000	5.1	18	22.5	15.2	9.03161
798500	7.3	16.1	16.1	13.1667	5.08068
799000	6.4	22.4	31.7	20.1667	12.797
799500	2.9	19.9	24.9	15.9	11.5326
800000	2.3	13.1	21.2	12.2	9.48209
800500	1.4	16.3	21.7	13.1333	10.514
801000	3.3	10.5	14	9.26667	5.45558
801500	8.4	14.6	26.5	16.5	9.19837
802000	3.4	7.4	18.2	9.66667	7.65593
802500	2.9	10.8	13.2	8.96667	5.38919
803000	4.8	13.3	15.4	11.1667	5.61278
803500	1.7	13.6	18.5	11.2667	8.63964
804000	5.5	17.8	27	16.7667	10.7872
804500	7.3	12.8	23.8	14.6333	8.40139
805000	4	11.5	15.4	10.3	5.79396
805500	5.5	11.7	14.6	10.6	4.64866
806000	6.3	16.4	25.6	16.1	9.6535
806500	3.2	8	20.5	10.5667	8.93103
807000	2.9	11.7	18.5	11.0333	7.82134
807500	3.5	10.8	21.6	11.9667	9.10622
808000	3.1	21.2	25.1	16.4667	11.739
808500	3.7	15.3	23	14	9.71545
809000	4.1	14	20	12.7	8.02932
809500	5	16.1	24.2	15.1	9.63898
810000	2.1	4.9	10.5	5.83333	4.27707
810500	1.6	7.8	11.3	6.9	4.91223
811000	1.3	12.7	19.3	11.1	9.10604
811500	0.8	9.8	13.7	8.1	6.61589
812000	2.9	13.5	18.8	11.7333	8.09588
812500	7	11.3	14.5	10.9333	3.76342
813000	6.4	15.8	16.6	12.9333	5.67215
813500	9.1	14	21.7	14.9333	6.35164
814000	2.6	5.9	13	7.16667	5.31445
814500	4.5	11.1	20.1	11.9	7.83071
815000	3.4	12.4	16.2	10.6667	6.57368
815500	7.2	11.6	17.4	12.0667	5.11599
816000	6.2	12.6	14.4	11.0667	4.30968
816500	8.6	29.6	33.3	23.8333	13.3215
817000	5	15.5	22	14.1667	8.57807
817500	5.4	15.6	24.3	15.1	9.45992
818000	7.6	14.7	23.5	15.2667	7.96513
818500	4	23.3	29.1	18.8	13.1412
819000	3.8	17	29	16.6	12.6048
819500	6	12.1	14.9	11	4.55082
820000	5.4	10.1	19	11.5	6.90724
820500	5.1	11.9	18	11.6667	6.45316
821000	2.1	14.2	30.1	15.4667	14.0429
821500	5	17.2	28.7	16.9667	11.8517
822000	3.1	13.9	15.5	10.8333	6.74487
822500	5.1	25.8	29.6	20.1667	13.1857
823000	5	12	19	12	7
823500	8.3	23.6	35.6	22.5	13.6832
824000	6.4	12.7	16.5	11.8667	5.10131
824500	5	17.8	21.3	14.7	8.58079
825000	4.6	15.7	24.5	14.9333	9.97213
825500	3.3	11.5	17.5	10.7667	7.12835
826000	3.8	10.2	21.1	11.7	8.747
826500	5.8	20.7	26.4	17.6333	10.6369
827000	6.7	17.2	24.8	16.2333	9.08864
827500	3.4	16.3	22.6	14.1	9.78724
828000	1.5	9	10.4	6.96667	4.78574
828500	1.5	3	4.7	3.06667	1.60104
829000	3	10.3	22.2	11.8333	9.69141
829500	7.4	16.9	24.4	16.2333	8.51959
830000	3.2	17.7	21.9	14.2667	9.81139
830500	4.8	18.1	13.5	12.1333	6.7545
831000	6.3	11.1	14.8	10.7333	4.26185
831500	6.5	20.8	26	17.7667	10.0977
832000	3.5	22.1	26.3	17.3	12.1342
832500	1.6	17.4	25.1	14.7	11.9804
833000	4.4	16.8	27.4	16.2	11.5117
833500	5.4	10.9	19.8	12.0333	7.26659
834000	4.2	18	25.9	16.0333	10.9829
834500	6.8	20.4	22.1	16.4333	8.3859
835000	6	19.8	29.3	18.3667	11.7159
835500	2.8	12.1	21.4	12.1	9.3
836000	5.8	21.2	23.8	16.9333	9.72899
836500	9.8	9.8	9.8	9.8	0
837000	7.7	25.1	27	19.9333	10.6369
837500	4.1	19.6	30.1	17.9333	13.0799
838000	7.7	17.2	13.4	12.7667	4.78156
838500	6.2	17.6	22.9	15.5667	8.53366
839000	6	19.8	25.2	17	9.90152
839500	13	23.5	28.6	21.7	7.95424
840000	9.1	21.7	25.6	18.8	8.6238
840500	7.6	18.2	25.6	17.1333	9.04728
841000	4.9	24	29.6	19.5	12.9503
841500	13.3	23.3	25.5	20.7	6.50231
842000	7.1	21.4	23.6	17.3667	8.95898
842500	7.9	17.8	19.4	15.0333	6.22923
843000	9	13.5	15.4	12.6333	3.28684
843500	4.5	10.8	20.5	11.9333	8.05998
844000	7.8	14.9	20	14.2333	6.12726
844500	6.9	20.8	24.3	17.3333	9.20344
845000	10.8	23	24.9	19.5667	7.65136
845500	7.5	14.1	20.8	14.1333	6.65006
846000	12.8	20.8	26.3	19.9667	6.78847
846500	15.8	25.6	23.7	21.7	5.19711
847000	19.1	24.3	32.8	25.4	6.91592
847500	18.9	25.2	30.8	24.9667	5.95343
848000	10.4	20.4	37.3	22.7	13.5967
848500	9.5	19.7	30.2	19.8	10.3504
849000	9.6	19.1	34.6	21.1	12.6194
849500	8.7	19.5	30.1	19.4333	10.7002
850000	8	16.3	28.7	17.6667	10.4175
850500	10.1	18.5	25.2	17.9333	7.56593
851000	7.8	18.5	33	19.7667	12.6477
851500	6	21.4	28.5	18.6333	11.5023
852000	6	15.6	28	16.5333	11.0297
852500	5.7	18.2	23	15.6333	8.93103
853000	4.8	14.1	22	13.6333	8.60949
853500	3.2	13.8	21.4	12.8	9.14112
854000	2.9	14.1	17.7	11.5667	7.71838
854500	10.7	20.4	25.9	19	7.6961
855000	6.5	18.9	28.7	18.0333	11.1253
855500	7.2	23.2	29	19.8	11.2907
856000	10.1	24.4	33.8	22.7667	11.9341
856500	3.7	22.1	30.8	18.8667	13.8363
857000	4.5	20.9	32.3	19.2333	13.9747
857500	4.8	21.2	36.8	20.9333	16.0017
858000	1.8	7.4	9.7	6.3	4.06325
858500	2.7	8.8	17.5	9.66667	7.43797
859000	6.7	15	26.2	15.9667	9.78587
859500	8.2	14.8	20.1	14.3667	5.96182
860000	3	13.4	22.9	13.1	9.95339
860500	1.8	17.2	25.4	14.8	11.9817
861000	4.3	9.8	28.4	14.1667	12.6295
861500	2.2	4.1	11	5.76667	4.63069
862000	2	6.3	12.5	6.93333	5.27857
862500	5.7	11	19.4	12.0333	6.90821
863000	4.8	9.8	19.4	11.3333	7.41979
863500	2.4	9.4	15	8.93333	6.31295
864000	1.6	12.2	25.6	13.1333	12.0272
864500	1	3.4	15.1	6.5	7.54387
865000	1.8	7	13	7.26667	5.60476
865500	4.8	9.7	16.5	10.3333	5.87566
866000	3	7.6	14.9	8.5	6.00083
866500	2	7.4	16.6	8.66667	7.38196
867000	5.2	12.2	23.7	13.7	9.34077
867500	5.5	12.1	19.2	12.2667	6.85152
868000	4.8	9.6	19.3	11.2333	7.3867
868500	2.7	10.8	17.2	10.2333	7.26659
869000	2.1	12.6	16.1	10.2667	7.28583
869500	1.6	7.8	16.2	8.53333	7.32757
870000	5	14.8	24.3	14.7	9.65039
870500	3.2	9.6	16.4	9.73333	6.60101
871000	2.6	12.6	14	9.73333	6.21718
871500	2.3	9.7	18	10	7.8543
872000	4.3	15.6	19.5	13.1333	7.89451
872500	3.2	10.2	18.8	10.7333	7.81366
873000	9.8	20.6	24	18.1333	7.4144
873500	2.2	14.9	22.3	13.1333	10.1658
874000	0.9	7	17.6	8.5	8.45044
874500	1.6	11.4	24.4	12.4667	11.4374
875000	1.6	11	23	11.8667	10.7263
875500	3.2	15.8	21.4	13.4667	9.32166
876000	1.1	9.9	19.2	10.0667	9.05115
876500	1	7.9	7.9	5.6	3.98372
877000	0.8	7.7	19	9.16667	9.18822
877500	0.8	10.8	24.5	12.0333	11.898
878000	2.7	20.1	27.4	16.7333	12.6895
878500	1.9	8.5	17.1	9.16667	7.6219
879000	2.4	19	22.5	14.6333	10.7379
879500	3.2	11.2	17.5	10.6333	7.16682
880000	2.7	13.2	21.4	12.4333	9.37354
880500	1.8	12.9	19.6	11.4333	8.99018
881000	3.8	10.1	22.7	12.2	9.62341
881500	6.2	16.4	23	15.2	8.46404
882000	5.1	11.6	19.7	12.1333	7.3146
882500	2.6	11.6	20.7	11.6333	9.05005
883000	2.4	6.8	11.9	7.03333	4.7543
883500	3.4	8.4	10.1	7.3	3.48281
884000	3.2	17.2	20.3	13.5667	9.11062
884500	1.2	7.5	15	7.9	6.90869
885000	1.8	9.3	19.8	10.3	9.04157
885500	6.9	12.9	22	13.9333	7.60285
886000	6.8	16.5	22	15.1	7.6961
886500	4.3	11.4	15.3	10.3333	5.57704
887000	3.2	11.2	24	12.8	10.4919
887500	1.7	9.6	11	7.43333	5.01431
888000	1.7	8.3	8.3	6.1	3.81051
888500	3.4	15.4	19.2	12.6667	8.24702
889000	9.5	25	28.7	21.0667	10.1864
889500	2.8	11.4	14.7	9.63333	6.14356
890000	4.9	8.8	19.3	11	7.44782
890500	5.2	17.3	16.4	12.9667	6.74117
891000	1.8	8.2	14.7	8.23333	6.45006
891500	3.2	11.8	20.2	11.7333	8.5002
892000	3	13.7	19.4	12.0333	8.32606
892500	4.1	14.6	21.9	13.5333	8.94781
893000	5.3	15.5	27	15.9333	10.8565
893500	3.6	16.8	24.2	14.8667	10.4352
894000	1.7	11.7	13.8	9.06667	6.46555
894500	1	4.7	15.5	7.06667	7.53414
895000	1.6	10.4	18.4	10.1333	8.40317
895500	2.8	11.3	20.8	11.6333	9.00463
896000	5.7	21.5	27.5	18.2333	11.2611
896500	1.9	17.7	23.6	14.4	11.2201
897000	1.8	15.7	22.1	13.2	10.3783
897500	6.8	13.8	18.7	13.1	5.9808
898000	4.5	12	15	10.5	5.40833
898500	4.5	16	21.4	13.9667	8.63153
899000	2.3	8.4	22.5	11.0667	10.3607
899500	1.2	4.5	19.5	8.4	9.75346
900000	1.6	7.8	17.9	9.1	8.22739
900500	3.3	15.4	21.5	13.4	9.26337
901000	2.2	21.1	25	16.1	12.1947
901500	2.1	12.1	21.2	11.8	9.55353
902000	1.5	9.8	20.7	10.6667	9.6293
902500	3.5	14.3	15.2	11	6.51076
903000	2.2	10.3	16.2	9.56667	7.02875
903500	3.1	10.6	15.4	9.7	6.19919
904000	4.8	15.2	19.1	13.0333	7.39211
904500	1.5	9.9	15.9	9.1	7.23326
905000	3.2	13.2	21.8	12.7333	9.30878
905500	2.1	11.5	24.1	12.5667	11.0387
906000	2.8	16.1	24	14.3	10.714
906500	2.3	21.9	25.9	16.7	12.6301
907000	2.9	11.9	21.4	12.0667	9.25113
907500	1.4	16	20	12.4667	9.79047
908000	4.3	14.6	14.6	11.1667	5.94671
908500	3.6	13.1	15.8	10.8333	6.40807
909000	2	16.9	18.8	12.5667	9.20018
909500	13	24.5	28.2	21.9	7.92654
910000	14.2	23	22.9	20.0333	5.05206
910500	10.7	24.4	26	20.3667	8.40972
911000	9	13.6	13.3	11.9667	2.57358
911500	3.4	12.1	21.9	12.4667	9.25545
912000	3.4	12	13.8	9.73333	5.55818
912500	2.9	8.3	15	8.73333	6.06163
913000	2.1	8.6	15.8	8.83333	6.85298
913500	2	15.1	20.2	12.4333	9.38847
914000	0.8	7.5	16.9	8.4	8.08764
914500	0.8	7.2	20.3	9.43333	9.93999
915000	1.1	12.8	23.2	12.3667	11.0564
915500	2.3	14.6	21.4	12.7667	9.68108
916000	2.2	12.6	17.4	10.7333	7.77003
916500	1.4	8.1	18.8	9.43333	8.77629
917000	2	6.7	15.4	8.03333	6.79877
917500	1.8	16.7	24.7	14.4	11.622
918000	1	11.6	23.6	12.0667	11.3072
918500	1.4	6.9	16	8.1	7.3736
919000	2.7	14.8	20.6	12.7	9.13291
919500	3	15.6	26.7	15.1	11.8579
920000	1.3	14.7	22.1	12.7	10.5432
920500	2	13	23.9	12.9667	10.95
921000	1.5	7.3	16.2	8.33333	7.40428
921500	1.4	11.6	21.3	11.4333	9.95105
922000	1.6	13.3	22	12.3	10.2367
922500	2.2	14.8	26.6	14.5333	12.2022
923000	2.3	15.2	28.5	15.3333	13.1005
923500	1.3	11.8	21.7	11.6	10.2015
924000	1.6	15.4	19.4	12.1333	9.33881
924500	4.7	9.8	11.4	8.63333	3.49905
925000	3.7	12.2	19.3	11.7333	7.81046
925500	1.9	14.8	22.5	13.0667	10.4088
926000	1.1	12.4	21.5	11.6667	10.2198
926500	3.7	15.7	17.5	12.3	7.502
927000	3.6	16.5	20.2	13.4333	8.71455
927500	3.6	17.5	23.4	14.8333	10.1658
928000	2.6	15.6	24.2	14.1333	10.8744
928500	4.1	14.9	19.9	12.9667	8.07548
929000	5.6	20.4	22.8	16.2667	9.31522
929500	1.6	10.3	13.2	8.36667	6.03683
930000	0.9	14.6	14.6	10.0333	7.9097
930500	1.1	14.1	22	12.4	10.5532
931000	3.4	27.3	34.6	21.7667	16.3194
931500	4.8	18.2	24.7	15.9	10.1474
932000	2.1	8.6	17.3	9.33333	7.62649
932500	2	16.4	24.5	14.3	11.3961
933000	6.5	21.6	27.4	18.5	10.7893
933500	3.7	13.1	13.1	9.96667	5.42709
934000	2	12.4	15.4	9.93333	7.03231
934500	1	7.5	18.7	9.06667	8.9534
935000	2.6	16.4	20.7	13.2333	9.45639
935500	2	7.9	17.9	9.26667	8.03762
936000	1.2	11.8	17.7	10.2333	8.36082
936500	2.4	18.5	31.9	17.6	14.7706
937000	4.6	12.2	14	10.2667	4.98932
937500	2.8	8.9	13.9	8.53333	5.55908
938000	4.2	14.4	19	12.5333	7.57452
938500	5.6	14.9	20.4	13.6333	7.48086
939000	5.4	17.8	23.3	15.5	9.16897
939500	3.7	20.1	23.8	15.8667	10.6978
940000	3.6	24	31.4	19.6667	14.3977
940500	1.8	7.2	26.9	11.9667	13.2115
941000	2.9	7.5	26.4	12.2667	12.454
941500	7.6	15.3	18.7	13.8667	5.68712
942000	3	6.4	16.4	8.6	6.96563
942500	4.3	18.5	24.5	15.7667	10.3737
943000	1.7	15.5	22.4	13.2	10.5399
943500	1.9	8.8	14.6	8.43333	6.35793
944000	9.3	13.4	17.4	13.3667	4.0501
944500	3.2	16.8	21.8	13.9333	9.62566
945000	3.9	11.1	19	11.3333	7.5527
945500	4.7	8.7	13.4	8.93333	4.35469
946000	5	16.9	28.2	16.7	11.6013
946500	5.3	9.7	17.5	10.8333	6.17846
947000	3.2	15	20.6	12.9333	8.88219
947500	2.3	15	24	13.7667	10.9024
948000	5.9	14.9	23.3	14.7	8.70172
948500	4.1	11.3	17	10.8	6.46452
949000	4.5	22.5	29.7	18.9	12.98
949500	3.9	16.5	23.6	14.6667	9.97714
950000	1	13.4	21.7	12.0333	10.4175
950500	1.4	11.1	16.2	9.56667	7.5182
951000	2.5	15.2	17.3	11.6667	8.0077
951500	3.4	8.5	16.4	9.43333	6.55006
952000	1.6	13.8	24.5	13.3	11.4582
952500	1.1	20.5	27.3	16.3	13.5956
953000	1.3	13.3	21.1	11.9	9.97397
953500	4.9	19.5	33.7	19.3667	14.4005
954000	4.5	12.6	27.1	14.7333	11.45
954500	7	18.8	27.2	17.6667	10.1476
955000	4.5	11.8	23.5	13.2667	9.58454
955500	3.5	10.1	16	9.86667	6.25327
956000	1.5	7.7	12.4	7.2	5.46717
956500	0.9	9.1	18.7	9.56667	8.90917
957000	1.4	14.6	26.8	14.2667	12.7033
957500	3.6	8.5	17	9.7	6.78012
958000	3	9.5	18	10.1667	7.52219
958500	5	13.7	20.8	13.1667	7.91349
959000	6.7	17.4	24	16.0333	8.7306
959500	4.7	15.1	22.1	13.9667	8.75519
960000	3.2	13.9	23.6	13.5667	10.2041
960500	3.9	10.6	16.2	10.2333	6.15819
961000	5.4	15.6	29.9	16.9667	12.307
961500	5.7	23.8	36.1	21.8667	15.2919
962000	11.4	23.2	29	21.2	8.96883
962500	1.6	13.2	24.6	13.1333	11.5001
963000	0.9	6.1	18.2	8.4	8.87637
963500	2.6	13.7	25.4	13.9	11.4013
964000	2	15.1	19.4	12.1667	9.0633
964500	1.7	12.5	20.4	11.5333	9.3874
965000	5.6	19.5	29.2	18.1	11.8621
965500	2.5	13.4	21.7	12.5333	9.6293
966000	4	10.2	19	11.0667	7.53746
966500	6.7	11.8	15.2	11.2333	4.27824
967000	4.6	15.1	15.1	11.6	6.06218
967500	6.1	21.8	27.3	18.4	11.0014
968000	6.7	15	24.3	15.3333	8.80473
968500	6.1	18.5	27.7	17.4333	10.8394
969000	6.9	18.8	18.8	14.8333	6.87047
969500	4.5	13	16.2	11.2333	6.04676
970000	2.3	11.5	17.9	10.5667	7.84177
970500	2.4	18.7	25.4	15.5	11.8292
971000	4.4	18.5	24	15.6333	10.1096
971500	2.7	11.9	18.7	11.1	8.02994
972000	4.1	7.6	13.6	8.43333	4.80451
972500	6.7	17.8	23.2	15.9	8.41249
973000	5.4	9.8	19.6	11.6	7.26911
973500	3.4	12	28.5	14.6333	12.7555
974000	4.8	13.6	19.8	12.7333	7.53746
974500	3	12.9	23.9	13.2667	10.4548
975000	3.7	5	10.1	6.26667	3.3828
975500	4.2	13.4	21.5	13.0333	8.65583
976000	8.9	17.1	33.8	19.9333	12.6895
976500	3.7	13.7	15.2	10.8667	6.25167
977000	4.1	12.9	16.4	11.1333	6.33745
977500	5.7	18.5	16.7	13.6333	6.92917
978000	2.9	18.7	25.9	15.8333	11.7649
978500	3.9	15.8	17.9	12.5333	7.55006
979000	5.8	17.6	34.8	19.4	14.5836
979500	2.3	14.8	22.2	13.1	10.0583
980000	1.7	8.7	12.7	7.7	5.56776
980500	1.8	13	17.9	10.9	8.25288
981000	5.2	19.2	28.2	17.5333	11.5902
981500	6.4	12.1	22.2	13.5667	8.00146
982000	3.6	13.6	15.6	10.9333	6.4291
982500	1.3	11.8	19.6	10.9	9.18314
983000	1.6	22.9	35.2	19.9	16.9997
983500	1.3	11.8	26.6	13.2333	12.7108
984000	4.7	12.3	21.1	12.7	8.20731
984500	11.9	20.8	28	20.2333	8.06494
985000	5.1	15.8	20.3	13.7333	7.8079
985500	4.2	13.4	15.1	10.9	5.8643
986000	8	14.5	12.6	11.7	3.34215
986500	7.2	23.3	23.9	18.1333	9.4733
987000	3.9	15.7	18.9	12.8333	7.90021
987500	3.5	16.9	26.2	15.5333	11.4115
988000	6.6	16.4	32.7	18.5667	13.1842
988500	10.1	16.3	28.9	18.4333	9.57984
989000	4.9	11.4	20.9	12.4	8.04674
989500	4.7	13.6	13.6	10.6333	5.13842
990000	5.9	20.2	25.6	17.2333	10.1796
990500	2	11	19	10.6667	8.5049
991000	2.9	15.7	22.4	13.6667	9.90774
991500	4.7	17.2	22.6	14.8333	9.18168
992000	10.6	18	20.6	16.4	5.18845
992500	3.9	12.9	18.3	11.7	7.27461
993000	4.2	14.2	23	13.8	9.40638
993500	6.9	24.1	31.5	20.8333	12.6211
994000	4.3	17.8	21.4	14.5	9.01499
994500	7.1	15.4	23.1	15.2	8.00187
995000	3.5	15.6	29.9	16.3333	13.2153
995500	4.5	5.1	15.1	8.23333	5.95427
996000	7.9	15.8	14.9	12.8667	4.32474
996500	8.3	18.1	18.1	14.8333	5.65803
997000	12.7	18.2	20	16.9667	3.80307
997500	3.4	22.8	21.8	16	10.9234
998000	1.8	14.2	22.6	12.8667	10.4639
998500	2.3	6.1	16.5	8.3	7.35119
999000	4.4	8.8	16.1	9.76667	5.9096
999500	5.4	8.3	11.7	8.46667	3.15331
1000000	7	12.5	16.8	12.1	4.91223
1000500	4.8	19.5	24.9	16.4	10.4024
1001000	1.8	13.9	19.7	11.8	9.13291
1001500	1.5	6.5	11.5	6.5	5
1002000	4.7	24.8	22.5	17.3333	11.0011
1002500	1.2	11.7	18.2	10.3667	8.57807

## Sheet: Furaneol methylether-pb2A
	GC-SSR responses to furaneol methylether
T[ms]	F[Hz]	F[Hz]	F[Hz]	Average	SD
150000	71.4	57.8	61.7	63.6333	7.00309
150500	74.6	69	70.9	71.5	2.84781
151000	77.5	69.4	73.5	73.4667	4.0501
151500	58.1	56.2	56.2	56.8333	1.09697
152000	82	69	72.5	74.5	6.72681
152500	74.6	59.9	63.3	65.9333	7.69567
153000	72.5	62.5	72.5	69.1667	5.7735
153500	74.1	68	70.4	70.8333	3.073
154000	69	61.3	63.3	64.5333	3.99541
154500	64.9	51.5	51.5	55.9667	7.73649
155000	73	65.4	67.6	68.6667	3.91067
155500	84	76.3	82	80.7667	3.99541
156000	68	54.3	58.1	60.1333	7.07272
156500	74.1	63.7	63.7	67.1667	6.00444
157000	70.4	56.8	60.6	62.6	7.01712
157500	76.3	68.5	72.5	72.4333	3.90043
158000	74.6	68.5	70.4	71.1667	3.12143
158500	71.4	65.4	67.1	67.9667	3.09246
159000	83.3	76.9	76.9	79.0333	3.69504
159500	87.7	71.9	76.3	78.6333	8.15434
160000	80	68.5	72.5	73.6667	5.83809
160500	72.5	62.9	64.9	66.7667	5.06491
161000	68	60.2	64.1	64.1	3.9
161500	75.2	69.4	73.5	72.7	2.98161
162000	80	71.9	74.1	75.3333	4.18848
162500	74.6	64.9	70.4	69.9667	4.8645
163000	76.9	61.3	65.4	67.8667	8.08723
163500	76.3	66.7	66.7	69.9	5.54256
164000	69.9	57.1	61	62.6667	6.56074
164500	79.4	67.6	71.4	72.8	6.02329
165000	81.3	66.2	73.5	73.6667	7.55138
165500	69	58.1	63.3	63.4667	5.45191
166000	66.7	45	54.9	55.5333	10.8639
166500	84	73	74.6	77.2	5.94306
167000	73.5	59.5	63.3	65.4333	7.23971
167500	81.3	64.5	68.5	71.4333	8.77572
168000	70.9	64.9	67.1	67.6333	3.03535
168500	69	58.8	62.9	63.5667	5.13258
169000	85.5	67.1	71.4	74.6667	9.62514
169500	87	67.6	79.4	78	9.77548
170000	90.1	78.1	82	83.4	6.12127
170500	66.2	62.1	62.1	63.4667	2.36714
171000	95.2	68.5	74.1	79.2667	14.0799
171500	106.4	71.9	88.5	88.9333	17.2541
172000	69.9	62.1	62.1	64.7	4.50333
172500	73.5	64.1	66.2	67.9333	4.9339
173000	68.5	53.2	53.2	58.3	8.83346
173500	71.9	69.9	71.9	71.2333	1.1547
174000	77.5	68	71.9	72.4667	4.77528
174500	67.1	54.1	55.9	59.0333	7.04367
175000	74.1	64.1	69.9	69.3667	5.02129
175500	79.4	71.4	71.4	74.0667	4.6188
176000	78.1	74.6	76.3	76.3333	1.75024
176500	69	67.1	69	68.3667	1.09697
177000	66.7	59.2	62.9	62.9333	3.75011
177500	68	68	68	68	0
178000	75.8	73.5	73.5	74.2667	1.32791
178500	75.2	69.4	69.4	71.3333	3.34863
179000	65.8	64.1	64.1	64.6667	0.981495
179500	71.9	69.9	71.9	71.2333	1.1547
180000	75.8	71.9	71.9	73.2	2.25167
180500	70.4	70.4	70.4	70.4	0
181000	64.1	58.5	58.5	60.3667	3.23316
181500	65.8	63.7	63.7	64.4	1.21244
182000	73	71.4	71.4	71.9333	0.92376
182500	71.4	61.3	63.3	65.3333	5.34821
183000	71.4	68	69.9	69.7667	1.70392
183500	61.3	59.5	61.3	60.7	1.03923
184000	71.9	70.4	70.4	70.9	0.866025
184500	75.8	73.5	73.5	74.2667	1.32791
185000	75.8	71.9	71.9	73.2	2.25167
185500	70.4	66.7	66.7	67.9333	2.1362
186000	76.9	73	76.9	75.6	2.25167
186500	66.2	63.7	63.7	64.5333	1.44338
187000	82	68	71.9	73.9667	7.22519
187500	80	74.6	74.6	76.4	3.11769
188000	69.9	65.8	65.8	67.1667	2.36714
188500	67.1	67.1	67.1	67.1	0
189000	84	71.9	71.9	75.9333	6.98594
189500	69.4	67.6	67.6	68.2	1.03923
190000	69.9	64.5	66.2	66.8667	2.76104
190500	80.6	76.9	80.6	79.3667	2.1362
191000	63.7	59.5	61.3	61.5	2.10713
191500	79.4	73.5	75.8	76.2333	2.97377
192000	77.5	63.7	65.8	69	7.43572
192500	76.9	61.3	63.3	67.1667	8.48842
193000	74.1	74.1	74.1	74.1	0
193500	67.1	57.1	61.3	61.8333	5.02129
194000	70.9	61.3	67.1	66.4333	4.8346
194500	76.9	68	69.9	71.6	4.68722
195000	74.1	60.2	64.1	66.1333	7.16961
195500	92.6	84.7	88.5	88.6	3.95095
196000	71.9	68	69.9	69.9333	1.95021
196500	90.9	58.8	74.6	74.7667	16.0506
197000	70	57.1	64.9	64	6.49692
197500	84.7	70.9	75.2	76.9333	7.0614
198000	81.3	67.6	73.5	74.1333	6.87192
198500	76.9	67.1	69	71	5.19711
199000	76.9	69.4	73	73.1	3.751
199500	65.4	55.2	59.9	60.1667	5.10523
200000	97.1	84	84	88.3667	7.56329
200500	74.1	66.7	68.5	69.7667	3.85919
201000	63.3	59.5	61.3	61.3667	1.90088
201500	72.5	64.5	64.5	67.1667	4.6188
202000	73.5	73.5	73.5	73.5	0
202500	78.1	69.9	71.9	73.3	4.27551
203000	67.6	59.5	59.5	62.2	4.67654
203500	58.5	52.9	54.9	55.4333	2.83784
204000	69.4	65.4	67.1	67.3	2.00749
204500	75.2	64.9	69	69.7	5.18556
205000	61.3	57.1	57.5	58.6333	2.31805
205500	75.2	69	69	71.0667	3.57957
206000	66.2	52.6	52.6	57.1333	7.85196
206500	74.1	73.5	73.5	73.7	0.34641
207000	71.9	54.9	58.8	61.8667	8.90524
207500	70.4	64.5	68.5	67.8	3.01164
208000	68.5	66.2	68.5	67.7333	1.32791
208500	65.4	57.8	59.5	60.9	3.98873
209000	66.7	55.9	59.5	60.7	5.49909
209500	67.1	61.3	61.3	63.2333	3.34863
210000	61.7	59.9	59.9	60.5	1.03923
210500	70.4	64.9	70.4	68.5667	3.17543
211000	68	62.1	64.1	64.7333	3.00056
211500	75.2	73.5	73.5	74.0667	0.981495
212000	63.7	59.5	61.7	61.6333	2.10079
212500	60.2	59.5	59.5	59.7333	0.404145
213000	64.9	58.8	61	61.5667	3.08923
213500	55.9	49.8	53.5	53.0667	3.073
214000	87	79.4	81.3	82.5667	3.95517
214500	75.2	65.8	65.8	68.9333	5.42709
215000	69.9	64.5	66.2	66.8667	2.76104
215500	78.7	78.7	78.7	78.7	0
216000	63.3	59.2	59.2	60.5667	2.36714
216500	95.2	81.3	85.5	87.3333	7.12905
217000	65.4	61.3	63.3	63.3333	2.0502
217500	70.9	66.7	70.4	69.3333	2.2942
218000	80.6	76.9	76.9	78.1333	2.1362
218500	63.7	63.7	63.7	63.7	8.70234e-15
219000	67.1	67.1	67.1	67.1	0
219500	68.5	68.5	68.5	68.5	0
220000	71.4	69.4	69.4	70.0667	1.1547
220500	80.6	73	76.9	76.8333	3.80044
221000	68.5	62.9	64.9	65.4333	2.83784
221500	61.7	55.9	57.8	58.4667	2.95691
222000	62.9	60.6	60.6	61.3667	1.32791
222500	64.5	61	61	62.1667	2.02073
223000	79.4	77.5	77.5	78.1333	1.09697
223500	78.1	68.5	70.4	72.3333	5.08363
224000	69	61.3	63.3	64.5333	3.99541
224500	75.2	71.9	75.2	74.1	1.90526
225000	77.5	73.5	73.5	74.8333	2.3094
225500	66.7	62.5	64.5	64.5667	2.10079
226000	71.4	67.1	67.1	68.5333	2.48261
226500	76.9	75.2	75.2	75.7667	0.981495
227000	68	66.2	68	67.4	1.03923
227500	71.9	68	70.4	70.1	1.96723
228000	82	70.4	71.9	74.7667	6.30899
228500	65.8	63.7	63.7	64.4	1.21244
229000	69.4	67.6	67.6	68.2	1.03923
229500	63.7	63.7	63.7	63.7	8.70234e-15
230000	67.1	65.4	67.1	66.5333	0.981495
230500	77.5	71.4	71.4	73.4333	3.52184
231000	75.2	65.8	71.4	70.8	4.72864
231500	78.7	76.3	76.3	77.1	1.38564
232000	66.7	59.5	61.3	62.5	3.747
232500	58.8	54.9	54.9	56.2	2.25167
233000	86.2	82.6	84.7	84.5	1.80831
233500	72.5	64.1	64.1	66.9	4.84974
234000	64.1	64.1	64.1	64.1	0
234500	69.4	61.7	63.7	64.9333	3.99541
235000	63.3	57.1	59.2	59.8667	3.15331
235500	79.4	69.4	69.4	72.7333	5.7735
236000	76.3	73	74.6	74.6333	1.65025
236500	60.2	54.6	58.5	57.7667	2.87112
237000	58.5	58.5	58.5	58.5	0
237500	73	70.9	70.9	71.6	1.21244
238000	77.5	75.2	75.2	75.9667	1.32791
238500	72.5	64.5	66.7	67.9	4.1328
239000	78.1	74.1	75.8	76	2.00749
239500	69	65.4	65.4	66.6	2.07846
240000	76.3	72.5	72.5	73.7667	2.19393
240500	72.5	66.2	68.5	69.0667	3.188
241000	70.9	69	69	69.6333	1.09697
241500	73.5	67.6	69.4	70.1667	3.02379
242000	91.7	86.2	86.2	88.0333	3.17543
242500	71.4	63.7	65.8	66.9667	3.98037
243000	84	75.8	77.5	79.1	4.32782
243500	67.1	61.7	63.7	64.1667	2.73008
244000	65.4	57.8	59.9	61.0333	3.92471
244500	71.4	69.4	69.4	70.0667	1.1547
245000	76.9	69.4	71.4	72.5667	3.88373
245500	76.3	72.5	72.5	73.7667	2.19393
246000	69.9	61.3	62.9	64.7	4.57384
246500	69.9	68	68	68.6333	1.09697
247000	75.8	75.8	75.8	75.8	0
247500	71.9	66.2	66.2	68.1	3.2909
248000	77.5	77.5	77.5	77.5	0
248500	69	67.1	69	68.3667	1.09697
249000	79.4	73	73	75.1333	3.69504
249500	75.8	68	68	70.6	4.50333
250000	77.5	74.6	74.6	75.5667	1.67432
250500	65.4	63.3	63.3	64	1.21244
251000	77.5	71.4	71.4	73.4333	3.52184
251500	69.4	62.9	62.9	65.0667	3.75278
252000	75.8	75.8	75.8	75.8	0
252500	71.4	71.4	71.4	71.4	0
253000	73.5	65.8	68	69.1	3.96611
253500	68	59.9	61.7	63.2	4.25323
254000	69.4	63.3	65.4	66.0333	3.09892
254500	67.1	59.5	61.3	62.6333	3.97157
255000	66.7	63.3	63.3	64.4333	1.96299
255500	75.2	65.8	67.6	69.5333	4.98932
256000	63.7	59.5	59.5	60.9	2.42487
256500	64.5	64.5	64.5	64.5	0
257000	64.1	62.1	64.1	63.4333	1.1547
257500	71.4	69.4	69.4	70.0667	1.1547
258000	89.3	81.3	81.3	83.9667	4.6188
258500	66.7	62.9	64.5	64.7	1.90788
259000	66.7	66.7	66.7	66.7	0
259500	84.7	76.9	78.7	80.1	4.08412
260000	71.4	69.4	69.4	70.0667	1.1547
260500	71.9	68	68	69.3	2.25167
261000	64.5	60.6	60.6	61.9	2.25167
261500	66.7	62.9	64.9	64.8333	1.90088
262000	72.5	70.4	70.4	71.1	1.21244
262500	66.2	66.2	66.2	66.2	0
263000	84	80	80	81.3333	2.3094
263500	56.8	51.5	53.5	53.9333	2.67644
264000	66.7	58.8	58.8	61.4333	4.56107
264500	76.9	69.4	71.4	72.5667	3.88373
265000	62.5	57.1	57.1	58.9	3.11769
265500	67.1	65.4	67.1	66.5333	0.981495
266000	74.6	65.4	67.1	69.0333	4.89524
266500	78.1	70.4	72.5	73.6667	3.98037
267000	71.9	64.1	66.2	67.4	4.03609
267500	69.4	59.5	61.7	63.5333	5.1984
268000	69.4	63.3	65.4	66.0333	3.09892
268500	67.6	61	67.6	65.4	3.81051
269000	75.2	69.4	70.9	71.8333	3.01054
269500	71.9	71.9	71.9	71.9	0
270000	62.9	56.8	61	60.2333	3.12143
270500	75.8	68.5	68.5	70.9333	4.21466
271000	68	64.1	64.1	65.4	2.25167
271500	70.9	67.1	67.1	68.3667	2.19393
272000	69.4	61.3	63.3	64.6667	4.2194
272500	73	65.4	65.4	67.9333	4.38786
273000	80	69.9	69.9	73.2667	5.83124
273500	73.5	71.4	71.4	72.1	1.21244
274000	68	66.2	66.2	66.8	1.03923
274500	55.6	53.5	53.5	54.2	1.21244
275000	79.4	79.4	79.4	79.4	0
275500	61.7	57.8	57.8	59.1	2.25167
276000	84	80	82	82	2
276500	66.7	60.6	62.5	63.2667	3.12143
277000	71.9	68	68	69.3	2.25167
277500	73	67.1	69	69.7	3.01164
278000	82.6	69.9	69.9	74.1333	7.33235
278500	64.1	60.2	60.2	61.5	2.25167
279000	74.1	69	70.9	71.3333	2.57747
279500	74.6	70.9	70.9	72.1333	2.1362
280000	70.9	69	69	69.6333	1.09697
280500	64.5	62.5	62.5	63.1667	1.1547
281000	81.3	71.4	77.5	76.7333	4.99433
281500	59.9	55.9	57.8	57.8667	2.00083
282000	82.6	78.7	78.7	80	2.25167
282500	57.5	56.5	56.5	56.8333	0.57735
283000	63.3	61.3	61.3	61.9667	1.1547
283500	73.5	68	68	69.8333	3.17543
284000	74.1	68.5	70.4	71	2.84781
284500	58.1	56.5	56.5	57.0333	0.92376
285000	76.3	69	72.5	72.6	3.65103
285500	69	67.1	67.1	67.7333	1.09697
286000	68.5	64.1	66.2	66.2667	2.20076
286500	62.9	56.5	56.5	58.6333	3.69504
287000	60.2	58.5	58.5	59.0667	0.981495
287500	83.3	79.4	81.3	81.3333	1.95021
288000	71.9	71.9	71.9	71.9	0
288500	66.2	58.8	62.5	62.5	3.7
289000	63.3	59.5	63.3	62.0333	2.19393
289500	64.5	60.6	62.5	62.5333	1.95021
290000	75.8	68	74.1	72.6333	4.10163
290500	76.9	75.2	75.2	75.7667	0.981495
291000	70.9	62.9	62.9	65.5667	4.6188
291500	78.7	70.9	70.9	73.5	4.50333
292000	74.6	66.7	69	70.1	4.06325
292500	71.4	67.1	67.1	68.5333	2.48261
293000	71.4	71.4	71.4	71.4	0
293500	84.7	80.6	82.6	82.6333	2.0502
294000	79.4	77.5	77.5	78.1333	1.09697
294500	74.6	69	69	70.8667	3.23316
295000	69.4	64.9	64.9	66.4	2.59808
295500	69.4	62.1	64.1	65.2	3.77227
296000	75.2	73	73	73.7333	1.27017
296500	86.2	75.8	77.5	79.8333	5.57883
297000	68.5	64.5	64.5	65.8333	2.3094
297500	62.9	58.8	61	60.9	2.05183
298000	72.5	65.4	69	68.9667	3.55012
298500	65.4	61.3	63.3	63.3333	2.0502
299000	65.4	60.2	61.7	62.4333	2.67644
299500	71.4	69.4	71.4	70.7333	1.1547
300000	78.7	76.9	76.9	77.5	1.03923
300500	75.2	69.4	73	72.5333	2.92803
301000	66.2	54.9	58.8	59.9667	5.73963
301500	76.3	69	69	71.4333	4.21466
302000	68.5	62.5	62.5	64.5	3.4641
302500	72.5	66.7	68.5	69.2333	2.96873
303000	75.8	67.1	69	70.6333	4.5742
303500	73.5	73.5	73.5	73.5	0
304000	78.7	69	70.9	72.8667	5.14036
304500	64.1	63.3	63.3	63.5667	0.46188
305000	68	64.1	64.1	65.4	2.25167
305500	72.5	64.5	68.5	68.5	4
306000	73.5	71.4	71.4	72.1	1.21244
306500	82	75.8	78.1	78.6333	3.13422
307000	60.6	56.8	58.8	58.7333	1.90088
307500	72.5	66.7	72.5	70.5667	3.34863
308000	65.4	63.3	63.3	64	1.21244
308500	79.4	73.5	73.5	75.4667	3.40637
309000	64.9	58.8	61	61.5667	3.08923
309500	92.6	76.9	80.6	83.3667	8.20752
310000	63.3	61.3	61.3	61.9667	1.1547
310500	82	80	80	80.6667	1.1547
311000	83.3	79.4	79.4	80.7	2.25167
311500	69	63.7	63.7	65.4667	3.05996
312000	82	71.9	77.5	77.1333	5.05997
312500	66.2	65.4	65.4	65.6667	0.46188
313000	78.7	69	70.9	72.8667	5.14036
313500	82	75.8	77.5	78.4333	3.20364
314000	73.5	71.4	71.4	72.1	1.21244
314500	70.9	69	69	69.6333	1.09697
315000	82	78.1	80	80.0333	1.95021
315500	87	81.3	85.5	84.6	2.95466
316000	80.6	73	76.9	76.8333	3.80044
316500	75.2	67.1	69	70.4333	4.23596
317000	69.4	62.1	65.8	65.7667	3.65011
317500	79.4	74.1	77.5	77	2.68514
318000	75.8	74.1	75.8	75.2333	0.981495
318500	94.3	86.2	90.1	90.2	4.05093
319000	60.6	56.5	60.6	59.2333	2.36714
319500	87.7	81.3	81.3	83.4333	3.69504
320000	76.3	70.4	74.6	73.7667	3.03699
320500	75.2	69.4	71.4	72	2.94618
321000	82.6	76.9	76.9	78.8	3.2909
321500	84.7	80.6	84.7	83.3333	2.36714
322000	85.5	73.5	78.1	79.0333	6.0542
322500	72.5	64.5	68.5	68.5	4
323000	74.6	66.7	70.9	70.7333	3.95264
323500	75.2	71.9	71.9	73	1.90526
324000	79.4	73.5	75.8	76.2333	2.97377
324500	80	77.5	77.5	78.3333	1.44338
325000	74.1	68	71.9	71.3333	3.08923
325500	69.4	65.8	65.8	67	2.07846
326000	72.5	59.2	62.9	64.8667	6.86464
326500	90.9	82	85.5	86.1333	4.48367
327000	73.5	63.7	67.6	68.2667	4.9339
327500	87	82.6	84.7	84.7667	2.20076
328000	72.5	66.7	70.4	69.8667	2.93655
328500	82.6	70.9	70.9	74.8	6.755
329000	76.9	72.5	75.8	75.0667	2.28983
329500	74.1	66.2	68.5	69.6	4.06325
330000	89.3	78.1	82	83.1333	5.68536
330500	79.4	73	76.9	76.4333	3.22542
331000	62.5	58.8	60.6	60.6333	1.85023
331500	84.7	74.6	80.6	79.9667	5.0797
332000	76.3	70.9	74.6	73.9333	2.76104
332500	79.4	77.5	79.4	78.7667	1.09697
333000	71.9	68	68	69.3	2.25167
333500	76.3	68.5	74.6	73.1333	4.10163
334000	80.6	76.9	80.6	79.3667	2.1362
334500	80	68	74.1	74.0333	6.00028
335000	65.8	65.8	65.8	65.8	0
335500	85.5	73.5	79.4	79.4667	6.00028
336000	68	59.9	68	65.3	4.67654
336500	71.4	65.8	67.6	68.2667	2.8589
337000	80.6	80.6	80.6	80.6	0
337500	74.6	68.5	72.5	71.8667	3.09892
338000	91.7	82	84	85.9	5.12152
338500	67.6	57.8	61.7	62.3667	4.9339
339000	75.8	73.5	73.5	74.2667	1.32791
339500	72.5	70.4	72.5	71.8	1.21244
340000	87.7	78.1	80	81.9333	5.08363
340500	68.5	66.7	68.5	67.9	1.03923
341000	78.7	76.9	76.9	77.5	1.03923
341500	81.3	72.5	77.5	77.1	4.41362
342000	83.3	75.2	83.3	80.6	4.67654
342500	78.1	71.9	78.1	76.0333	3.57957
343000	88.5	80	86.2	84.9	4.39659
343500	70.9	62.1	67.6	66.8667	4.4456
344000	70.9	59.2	65.4	65.1667	5.85349
344500	84.7	73	78.7	78.8	5.85064
345000	87	87	87	87	0
345500	78.1	69.4	71.4	72.9667	4.55668
346000	84	74.1	76.3	78.1333	5.1984
346500	65.4	63.3	65.4	64.7	1.21244
347000	80.6	71.4	74.6	75.5333	4.67047
347500	71.4	65.4	69.4	68.7333	3.05505
348000	69	59.2	67.1	65.1	5.19711
348500	88.5	82	84	84.8333	3.32916
349000	67.1	57.5	64.9	63.1667	5.02925
349500	81.3	73.5	79.4	78.0667	4.06735
350000	79.4	74.6	75.2	76.4	2.61534
350500	61.3	59.5	59.5	60.1	1.03923
351000	84.7	78.7	82.6	82	3.04467
351500	75.8	68	74.1	72.6333	4.10163
352000	65.8	61.3	63.3	63.4667	2.25462
352500	66.2	64.1	64.1	64.8	1.21244
353000	84	76.3	78.1	79.4667	4.02782
353500	62.5	60.2	62.5	61.7333	1.32791
354000	80	69.9	74.1	74.6667	5.07379
354500	70.4	66.7	66.7	67.9333	2.1362
355000	84.7	74.6	80.6	79.9667	5.0797
355500	73.5	69	69	70.5	2.59808
356000	69.9	65.8	65.8	67.1667	2.36714
356500	68.5	64.5	66.7	66.5667	2.00333
357000	69	61	67.1	65.7	4.17971
357500	70.9	69	69	69.6333	1.09697
358000	75.8	75.8	75.8	75.8	0
358500	78.1	72.5	72.5	74.3667	3.23316
359000	79.4	75.2	77.5	77.3667	2.10317
359500	80.6	74.6	76.3	77.1667	3.09246
360000	69.4	63.7	65.8	66.3	2.88271
360500	69.9	64.1	66.2	66.7333	2.93655
361000	74.1	74.1	74.1	74.1	0
361500	75.2	73	73	73.7333	1.27017
362000	78.7	75.8	75.8	76.7667	1.67432
362500	87.7	80	80	82.5667	4.4456
363000	69	65.4	65.4	66.6	2.07846
363500	73.5	69.4	71.4	71.4333	2.0502
364000	84.7	73.5	76.9	78.3667	5.74224
364500	70.4	61	62.9	64.7667	4.97024
365000	77.5	67.6	73.5	72.8667	4.98029
365500	78.1	74.1	74.1	75.4333	2.3094
366000	70.4	66.7	68.5	68.5333	1.85023
366500	73.5	71.4	71.4	72.1	1.21244
367000	74.6	64.9	69	69.5	4.86929
367500	70.4	62.9	66.7	66.6667	3.75011
368000	72.5	62.5	66.7	67.2333	5.02129
368500	64.9	64.9	64.9	64.9	0
369000	82.6	76.9	82.6	80.7	3.2909
369500	73.5	69.4	69.4	70.7667	2.36714
370000	81.3	75.8	75.8	77.6333	3.17543
370500	62.9	61	61	61.6333	1.09697
371000	71.4	65.8	65.8	67.6667	3.23316
371500	80	75.8	75.8	77.2	2.42487
372000	69.4	63.7	65.8	66.3	2.88271
372500	78.7	75.2	78.7	77.5333	2.02073
373000	74.1	70.4	72.5	72.3333	1.85562
373500	73.5	69.9	71.9	71.7667	1.8037
374000	79.4	75.2	77.5	77.3667	2.10317
374500	64.9	55.6	57.5	59.3333	4.91359
375000	84	82	82	82.6667	1.1547
375500	81.3	73.5	73.5	76.1	4.50333
376000	83.3	79.4	79.4	80.7	2.25167
376500	68.5	62.5	62.5	64.5	3.4641
377000	70.9	67.1	70.9	69.6333	2.19393
377500	83.3	79.4	81.3	81.3333	1.95021
378000	80.6	74.6	74.6	76.6	3.4641
378500	102	86.2	87.7	91.9667	8.72143
379000	74.1	65.8	69.9	69.9333	4.1501
379500	75.2	64.1	67.6	68.9667	5.6748
380000	72.5	67.1	69	69.5333	2.73922
380500	78.7	76.9	78.7	78.1	1.03923
381000	76.9	71.4	76.9	75.0667	3.17543
381500	84.7	79.4	83.3	82.4667	2.74651
382000	70.4	64.9	66.7	67.3333	2.80416
382500	80	76.3	78.1	78.1333	1.85023
383000	96.2	78.7	82.6	85.8333	9.18713
383500	76.9	70.9	73	73.6	3.04467
384000	76.3	74.1	76.3	75.5667	1.27017
384500	77.5	71.9	71.9	73.7667	3.23316
385000	70.4	66.2	68	68.2	2.10713
385500	82.6	78.7	78.7	80	2.25167
386000	69	69	69	69	0
386500	94.3	80	84	86.1	7.37767
387000	93.5	82	86.2	87.2333	5.81922
387500	64.5	62.5	64.5	63.8333	1.1547
388000	71.4	68.5	69.4	69.7667	1.48436
388500	87.7	80	86.2	84.6333	4.08207
389000	76.9	73	75.2	75.0333	1.95533
389500	74.6	70.9	73	72.8333	1.85562
390000	79.4	75.8	75.8	77	2.07846
390500	67.6	61.7	61.7	63.6667	3.40637
391000	75.2	73	75.2	74.4667	1.27017
391500	72.5	66.2	66.2	68.3	3.63731
392000	79.4	79.4	79.4	79.4	0
392500	80.6	72.5	74.6	75.9	4.20357
393000	76.9	71.4	73	73.7667	2.82902
393500	72.5	66.7	70.4	69.8667	2.93655
394000	84.7	74.6	84.7	81.3333	5.83124
394500	83.3	76.9	82	80.7333	3.3828
395000	84	80	82	82	2
395500	78.7	70.9	74.6	74.7333	3.90171
396000	70.9	70.4	70.9	70.7333	0.288675
396500	74.6	74.6	74.6	74.6	0
397000	71.9	68	69.9	69.9333	1.95021
397500	87.7	75.8	77.5	80.3333	6.4361
398000	85.5	77.5	83.3	82.1	4.1328
398500	85.5	75.8	81.3	80.8667	4.8645
399000	69.9	64.1	68	67.3333	2.95691
399500	86.2	75.8	80	80.6667	5.23195
400000	78.1	68.5	70.4	72.3333	5.08363
400500	83.3	71.9	74.1	76.4333	6.04759
401000	92.6	84.7	84.7	87.3333	4.56107
401500	73	71.4	73	72.4667	0.92376
402000	68.5	66.7	66.7	67.3	1.03923
402500	90.9	79.4	83.3	84.5333	5.84836
403000	76.3	62.5	66.2	68.3333	7.14306
403500	101	95.2	101	99.0667	3.34863
404000	108.7	99	105.3	104.333	4.92172
404500	123.5	117.6	120.5	120.533	2.95014
405000	126.6	122	123.5	124.033	2.34592
405500	125	114.9	117.6	119.167	5.22909
406000	100	92.6	96.2	96.2667	3.70045
406500	97.1	90.9	92.6	93.5333	3.20364
407000	93.5	81.3	85.5	86.7667	6.19785
407500	91.7	84	84	86.5667	4.4456
408000	83.3	80.6	80.6	81.5	1.55885
408500	79.4	74.1	78.1	77.2	2.76225
409000	71.9	65.8	65.8	67.8333	3.52184
409500	80	74.1	78.1	77.4	3.01164
410000	74.6	69	70.9	71.5	2.84781
410500	84.7	81.3	81.3	82.4333	1.96299
411000	75.2	67.6	69.4	70.7333	3.97157
411500	69	67.1	67.1	67.7333	1.09697
412000	81.3	75.8	75.8	77.6333	3.17543
412500	74.1	64.9	64.9	67.9667	5.31162
413000	67.6	63.7	65.8	65.7	1.95192
413500	75.2	73	73	73.7333	1.27017
414000	83.3	75.8	80	79.7	3.75899
414500	69.4	67.6	67.6	68.2	1.03923
415000	75.2	73	73	73.7333	1.27017
415500	68	62.5	62.5	64.3333	3.17543
416000	70.4	68	68	68.8	1.38564
416500	74.6	70.4	72.5	72.5	2.1
417000	84.7	76.9	80.6	80.7333	3.90171
417500	71.9	69.9	69.9	70.5667	1.1547
418000	82.6	73	74.6	76.7333	5.14328
418500	73.5	65.8	69.4	69.5667	3.8527
419000	67.6	63.7	65.4	65.5667	1.95533
419500	69.9	64.1	68	67.3333	2.95691
420000	78.7	65.4	69.4	71.1667	6.82373
420500	69.9	66.2	66.2	67.4333	2.1362
421000	78.7	67.6	67.6	71.3	6.40859
421500	74.1	69.9	69.9	71.3	2.42487
422000	62.5	60.6	62.5	61.8667	1.09697
422500	70.9	69	69	69.6333	1.09697
423000	66.2	60.2	64.1	63.5	3.04467
423500	71.4	71.4	71.4	71.4	0
424000	76.3	59.2	64.9	66.8	8.70689
424500	77.5	71.9	71.9	73.7667	3.23316
425000	78.1	72.5	72.5	74.3667	3.23316
425500	83.3	76.9	79.4	79.8667	3.22542
426000	68.5	64.5	64.5	65.8333	2.3094
426500	78.1	76.3	78.1	77.5	1.03923
427000	76.3	68.5	70.4	71.7333	4.06735
427500	65.8	65.8	65.8	65.8	0
428000	76.9	76.9	76.9	76.9	0
428500	78.7	70.9	73	74.2	4.03609
429000	72.5	68.5	70.4	70.4667	2.00083
429500	73.5	69.4	71.4	71.4333	2.0502
430000	69.9	65.8	68	67.9	2.05183
430500	86.2	82	84	84.0667	2.10079
431000	84	78.1	82.6	81.5667	3.08275
431500	87	81.3	81.3	83.2	3.2909
432000	75.2	69.4	69.4	71.3333	3.34863
432500	71.4	68	68	69.1333	1.96299
433000	73.5	67.6	69.4	70.1667	3.02379
433500	66.7	61.3	63.3	63.7667	2.73008
434000	65.8	65.8	65.8	65.8	0
434500	78.7	69.4	71.4	73.1667	4.89524
435000	97.1	81.3	87.7	88.7	7.94733
435500	81.3	71.4	75.2	75.9667	4.99433
436000	70.4	68.5	68.5	69.1333	1.09697
436500	65.4	50	57.8	57.7333	7.70022
437000	69.4	65.4	67.6	67.4667	2.00333
437500	76.9	75.2	75.2	75.7667	0.981495
438000	68	61.7	65.8	65.1667	3.19739
438500	75.2	71.4	71.4	72.6667	2.19393
439000	70.9	69	70.9	70.2667	1.09697
439500	71.9	68	68	69.3	2.25167
440000	76.3	66.7	72.5	71.8333	4.8346
440500	72.5	62.9	66.7	67.3667	4.8346
441000	66.2	62.1	64.1	64.1333	2.0502
441500	74.6	62.9	66.7	68.0667	5.96853
442000	76.3	66.7	70.4	71.1333	4.84183
442500	81.3	75.2	75.2	77.2333	3.52184
443000	68	62.5	66.2	65.5667	2.80416
443500	70.4	56.8	64.5	63.9	6.81982
444000	78.7	71.4	76.9	75.6667	3.80307
444500	75.2	67.6	69.4	70.7333	3.97157
445000	82	69.4	74.1	75.1667	6.36736
445500	73	63.3	69	68.4333	4.87476
446000	74.6	68.5	70.4	71.1667	3.12143
446500	81.3	73.5	77.5	77.4333	3.90043
447000	84	77.5	82	81.1667	3.32916
447500	76.9	67.1	73	72.3333	4.9339
448000	75.2	63.3	67.1	68.5333	6.0781
448500	80	64.1	74.1	72.7333	8.03762
449000	87	78.7	78.7	81.4667	4.79201
449500	85.5	70.4	81.3	79.0667	7.7938
450000	82	68	78.1	76.0333	7.22519
450500	86.2	68	72.5	75.5667	9.47963
451000	87	69.9	83.3	80.0667	8.99685
451500	69	66.7	69	68.2333	1.32791
452000	76.9	69	76.9	74.2667	4.56107
452500	78.1	64.5	68.5	70.3667	6.98952
453000	82	69.9	75.8	75.9	6.05062
453500	72.5	66.7	70.4	69.8667	2.93655
454000	79.4	70.4	71.9	73.9	4.82183
454500	79.4	62.9	70.4	70.9	8.26136
455000	86.2	69.4	75.2	76.9333	8.53307
455500	87	69.9	73.5	76.8	9.01499
456000	83.3	69.9	79.4	77.5333	6.89227
456500	79.4	68	69.9	72.4333	6.10765
457000	69.4	61.7	69.4	66.8333	4.4456
457500	75.2	59.2	64.9	66.4333	8.10946
458000	81.3	74.6	76.9	77.6	3.40441
458500	81.3	69.4	76.9	75.8667	6.01692
459000	81.3	77.5	81.3	80.0333	2.19393
459500	76.9	67.6	76.9	73.8	5.36936
460000	76.9	62.9	74.6	71.4667	7.50755
460500	82	68	75.8	75.2667	7.01522
461000	78.1	66.7	72.5	72.4333	5.70029
461500	76.3	69	74.6	73.3	3.81969
462000	75.2	65.4	71.4	70.6667	4.94099
462500	74.1	64.9	68.5	69.1667	4.63609
463000	80.6	71.4	75.2	75.7333	4.62313
463500	81.3	64.5	74.1	73.3	8.42852
464000	77.5	62.1	69.9	69.8333	7.70022
464500	84.7	70.4	77.5	77.5333	7.15006
465000	85.5	73.5	79.4	79.4667	6.00028
465500	78.1	66.2	74.1	72.8	6.05558
466000	85.5	71.9	77.5	78.3	6.8352
466500	73.5	65.8	71.9	70.4	4.06325
467000	76.9	69	76.9	74.2667	4.56107
467500	87.7	80	82	83.2333	3.99541
468000	78.7	67.1	75.2	73.6667	5.95007
468500	80.6	64.9	69	71.5	8.1431
469000	83.3	68.5	73	74.9333	7.58705
469500	80.6	73	76.9	76.8333	3.80044
470000	73.5	63.7	71.4	69.5333	5.15978
470500	65.4	61.7	63.7	63.6	1.85203
471000	86.2	72.5	76.3	78.3333	7.07272
471500	80	72.5	76.3	76.2667	3.75011
472000	84.7	80.6	82.6	82.6333	2.0502
472500	86.2	78.1	84	82.7667	4.18848
473000	71.9	64.5	66.7	67.7	3.8
473500	70.4	66.7	66.7	67.9333	2.1362
474000	72.5	68	69.9	70.1333	2.25906
474500	82	71.9	76.3	76.7333	5.06392
475000	91.7	80	82	84.5667	6.25806
475500	76.3	69.9	72.5	72.9	3.2187
476000	98	86.2	91.7	91.9667	5.90452
476500	89.3	73.5	79.4	80.7333	7.98394
477000	83.3	71.4	73.5	76.0667	6.35164
477500	81.3	73.5	79.4	78.0667	4.06735
478000	82.6	69.9	75.8	76.1	6.35531
478500	78.1	71.9	71.9	73.9667	3.57957
479000	84	76.3	80	80.1	3.85097
479500	80	64.9	70.9	71.9333	7.60285
480000	84	75.2	76.9	78.7	4.66798
480500	84.7	76.9	78.7	80.1	4.08412
481000	95.2	85.5	93.5	91.4	5.17977
481500	84.7	70.9	76.9	77.5	6.91954
482000	84.7	70.4	76.9	77.3333	7.15984
482500	80.6	72.5	76.3	76.4667	4.05257
483000	76.3	74.6	74.6	75.1667	0.981495
483500	87.7	78.1	82	82.6	4.82804
484000	67.1	64.9	67.1	66.3667	1.27017
484500	90.1	82	85.5	85.8667	4.06243
485000	83.3	75.2	76.9	78.4667	4.27122
485500	100	82.6	84.7	89.1	9.49789
486000	85.5	76.3	82	81.2667	4.64363
486500	83.3	77.5	77.5	79.4333	3.34863
487000	81.3	71.4	71.4	74.7	5.71577
487500	91.7	83.3	85.5	86.8333	4.35584
488000	84.7	70.9	75.2	76.9333	7.0614
488500	84.7	74.6	74.6	77.9667	5.83124
489000	76.9	71.4	73.5	73.9333	2.77549
489500	84.7	76.3	80.6	80.5333	4.2004
490000	78.7	72.5	74.6	75.2667	3.15331
490500	67.6	60.2	62.1	63.3	3.84318
491000	80.6	76.9	80.6	79.3667	2.1362
491500	76.9	70.9	73	73.6	3.04467
492000	89.3	75.8	83.3	82.8	6.76387
492500	66.7	62.5	64.5	64.5667	2.10079
493000	81.3	71.4	73.5	75.4	5.21632
493500	87	79.4	83.3	83.2333	3.80044
494000	82.6	73	78.7	78.1	4.82804
494500	81.3	71.4	73.5	75.4	5.21632
495000	70.9	64.9	69	68.2667	3.06649
495500	75.8	64.1	74.1	71.3333	6.32166
496000	77.5	75.8	75.8	76.3667	0.981495
496500	83.3	75.2	77.5	78.6667	4.17413
497000	89.3	79.4	79.4	82.7	5.71577
497500	78.1	68	71.9	72.6667	5.09346
498000	81.3	73.5	73.5	76.1	4.50333
498500	94.3	84	87.7	88.6667	5.2176
499000	75.8	69.9	75.8	73.8333	3.40637
499500	82	76.3	80	79.4333	2.89194
500000	84	80	80	81.3333	2.3094
500500	84.7	75.2	79.4	79.7667	4.7606
501000	79.4	61.3	71.4	70.7	9.07028
501500	66.7	53.8	59.5	60	6.46452
502000	81.3	69.4	76.9	75.8667	6.01692
502500	76.9	70.9	73	73.6	3.04467
503000	82	71.9	75.8	76.5667	5.09346
503500	83.3	78.1	82	81.1333	2.70617
504000	77.5	71.4	75.2	74.7	3.08058
504500	73	69.4	71.4	71.2667	1.8037
505000	74.1	70.4	71.9	72.1333	1.861
505500	74.1	68	71.9	71.3333	3.08923
506000	87	77.5	83.3	82.6	4.78853
506500	75.8	68	69.9	71.2333	4.06735
507000	77.5	66.2	73.5	72.4	5.72975
507500	71.9	71.9	71.9	71.9	0
508000	69.4	61.7	61.7	64.2667	4.4456
508500	86.2	72.5	80.6	79.7667	6.88791
509000	85.5	69.9	75.8	77.0667	7.87676
509500	77.5	66.2	71.9	71.8667	5.65007
510000	86.2	76.3	80	80.8333	5.00233
510500	76.3	66.7	70.4	71.1333	4.84183
511000	84.7	78.7	84.7	82.7	3.4641
511500	89.3	72.5	85.5	82.4333	8.80984
512000	87	84.7	84.7	85.4667	1.32791
512500	82	74.1	80	78.7	4.10731
513000	76.3	64.9	69	70.0667	5.77437
513500	64.1	60.2	60.2	61.5	2.25167
514000	78.1	72.5	76.3	75.6333	2.8589
514500	85.5	74.1	78.1	79.2333	5.78389
515000	83.3	75.2	76.9	78.4667	4.27122
515500	78.7	73	74.6	75.4333	2.93995
516000	78.1	70.4	72.5	73.6667	3.98037
516500	82.6	69	76.9	76.1667	6.82959
517000	90.9	82.6	84	85.8333	4.44335
517500	96.2	86.2	88.5	90.3	5.23737
518000	84	69	74.6	75.8667	7.5798
518500	81.3	62.5	70.4	71.4	9.43981
519000	93.5	81.3	87.7	87.5	6.10246
519500	95.2	76.9	80.6	84.2333	9.67592
520000	77.5	71.4	71.4	73.4333	3.52184
520500	78.1	70.4	74.6	74.3667	3.8553
521000	88.5	78.7	84.7	83.9667	4.94099
521500	82.6	70.9	74.6	76.0333	5.98025
522000	82.6	78.7	78.7	80	2.25167
522500	82	76.3	80	79.4333	2.89194
523000	80.6	80.6	80.6	80.6	0
523500	74.1	68.5	68.5	70.3667	3.23316
524000	73	70.9	70.9	71.6	1.21244
524500	100	84.7	86.2	90.3	8.43386
525000	94.3	78.1	86.2	86.2	8.1
525500	74.1	64.9	70.4	69.8	4.62925
526000	77.5	68	73.5	73	4.7697
526500	82.6	66.7	72.5	73.9333	8.04632
527000	87	76.9	80.6	81.5	5.10979
527500	87	76.9	81.3	81.7333	5.06392
528000	81.3	62.9	74.1	72.7667	9.27218
528500	80	62.9	68	70.3	8.77895
529000	84	71.4	76.9	77.4333	6.31691
529500	85.5	71.9	81.3	79.5667	6.96372
530000	70.9	64.9	64.9	66.9	3.4641
530500	70.9	67.1	69	69	1.9
531000	73	71.4	71.4	71.9333	0.92376
531500	80.6	70.4	74.1	75.0333	5.16366
532000	99	79.4	87	88.4667	9.88197
532500	85.5	71.9	81.3	79.5667	6.96372
533000	80	69.9	75.8	75.2333	5.07379
533500	83.3	71.9	79.4	78.2	5.79396
534000	87	79.4	81.3	82.5667	3.95517
534500	90.1	80	82	84.0333	5.34821
535000	82.6	78.7	80.6	80.6333	1.95021
535500	82	70.4	70.4	74.2667	6.69726
536000	76.3	71.4	73.5	73.7333	2.45832
536500	104.2	88.5	90.1	94.2667	8.63964
537000	77.5	68	69.9	71.8	5.02693
537500	74.6	70.9	73	72.8333	1.85562
538000	91.7	80	83.3	85	6.03241
538500	82.6	76.9	80.6	80.0333	2.89194
539000	90.9	77.5	81.3	83.2333	6.90604
539500	92.6	80.6	84.7	85.9667	6.09945
540000	90.1	73	78.7	80.6	8.70689
540500	80.6	61.7	69.4	70.5667	9.50386
541000	94.3	82	91.7	89.3333	6.48254
541500	100	73	84.7	85.9	13.5399
542000	82.6	64.9	74.6	74.0333	8.8636
542500	76.3	66.7	70.4	71.1333	4.84183
543000	71.9	54.9	64.5	63.7667	8.52369
543500	93.5	74.6	80.6	82.9	9.65764
544000	86.2	76.3	78.1	80.2	5.27352
544500	87.7	69.4	77.5	78.2	9.17006
545000	82.6	69.4	73	75	6.82349
545500	82	62.5	70.4	71.6333	9.80833
546000	74.6	67.6	73	71.7333	3.66788
546500	75.8	68	69.9	71.2333	4.06735
547000	87.7	69.4	75.2	77.4333	9.35218
547500	85.5	74.1	81.3	80.3	5.76541
548000	84.7	71.4	79.4	78.5	6.69552
548500	83.3	69.4	79.4	77.3667	7.16961
549000	84	74.6	80	79.5333	4.71734
549500	84	66.7	76.3	75.6667	8.66737
550000	94.3	75.8	88.5	86.2	9.46203
550500	62.9	57.5	57.5	59.3	3.11769
551000	84	64.1	67.6	71.9	10.624
551500	94.3	73.5	79.4	82.4	10.7196
552000	91.7	64.1	69.4	75.0667	14.6466
552500	91.7	74.1	82	82.6	8.81533
553000	85.5	68	71.9	75.1333	9.18713
553500	97.1	69.9	82	83	13.6275
554000	96.2	70.4	82	82.8667	12.9218
554500	84.7	63.3	75.2	74.4	10.7224
555000	86.2	70.4	80	78.8667	7.96074
555500	89.3	66.7	73	76.3333	11.6629
556000	103.1	71.4	80.6	85.0333	16.3084
556500	79.4	62.5	68.5	70.1333	8.56757
557000	92.6	72.5	78.7	81.2667	10.2929
557500	87.7	68	74.1	76.6	10.0851
558000	106.4	85.5	93.5	95.1333	10.5453
558500	80.6	65.4	75.2	73.7333	7.70541
559000	90.9	63.3	75.2	76.4667	13.8435
559500	95.2	71.4	80.6	82.4	12.0017
560000	90.1	69.4	78.1	79.2	10.3937
560500	102	66.7	90.1	86.2667	17.9595
561000	75.8	69.9	69.9	71.8667	3.40637
561500	68	54.6	66.2	62.9333	7.27278
562000	100	69.4	89.3	86.2333	15.5288
562500	100	71.9	82.6	84.8333	14.1825
563000	91.7	68	80	79.9	11.8503
563500	96.2	61	80.6	79.2667	17.6378
564000	105.3	70.9	90.1	88.7667	17.2387
564500	90.1	64.5	74.1	76.2333	12.9326
565000	90.1	76.3	82	82.8	6.9347
565500	104.2	76.3	90.1	90.2	13.9503
566000	89.3	75.8	79.4	81.5	6.99071
566500	97.1	79.4	84.7	87.0667	9.08424
567000	95.2	60.6	79.4	78.4	17.3217
567500	90.1	76.9	76.9	81.3	7.62102
568000	98	68.5	78.1	81.5333	15.0467
568500	97.1	73	81.3	83.8	12.243
569000	105.3	78.1	91.7	91.7	13.6
569500	81.3	65.4	73	73.2333	7.95257
570000	93.5	68.5	74.1	78.7	13.1195
570500	80	55.9	65.8	67.2333	12.1138
571000	84.7	71.4	75.2	77.1	6.85055
571500	76.3	68.5	72.5	72.4333	3.90043
572000	89.3	77.5	81.3	82.7	6.02329
572500	104.2	84.7	94.3	94.4	9.75038
573000	92.6	86.2	92.6	90.4667	3.69504
573500	90.9	69.4	77.5	79.2667	10.8583
574000	85.5	67.6	79.4	77.5	9.1
574500	98	76.9	84	86.3	10.7364
575000	94.3	78.1	84	85.4667	8.19898
575500	101	84	89.3	91.4333	8.69847
576000	76.9	61	75.2	71.0333	8.7306
576500	86.2	76.3	78.1	80.2	5.27352
577000	101	84.7	87	90.9	8.82213
577500	84	70.4	74.1	76.1667	7.0316
578000	72.5	62.9	68.5	67.9667	4.82217
578500	89.3	79.4	81.3	83.3333	5.25389
579000	80.6	65.8	76.9	74.4333	7.70216
579500	84	78.1	82	81.3667	3.00056
580000	81.3	67.6	73.5	74.1333	6.87192
580500	76.9	67.1	69	71	5.19711
581000	76.9	69.4	73	73.1	3.751
581500	65.4	55.2	59.9	60.1667	5.10523
582000	97.1	84	84	88.3667	7.56329
582500	74.1	66.7	68.5	69.7667	3.85919
583000	63.3	59.5	61.3	61.3667	1.90088
583500	72.5	64.5	64.5	67.1667	4.6188
584000	73.5	73.5	73.5	73.5	0
584500	78.1	69.9	71.9	73.3	4.27551
585000	67.6	59.5	59.5	62.2	4.67654
585500	58.5	52.9	54.9	55.4333	2.83784
586000	69.4	65.4	67.1	67.3	2.00749
586500	75.2	64.9	69	69.7	5.18556
587000	61.3	57.1	57.5	58.6333	2.31805
587500	75.2	69	69	71.0667	3.57957
588000	66.2	52.6	52.6	57.1333	7.85196
588500	74.1	73.5	73.5	73.7	0.34641
589000	71.9	54.9	58.8	61.8667	8.90524
589500	70.4	64.5	68.5	67.8	3.01164
590000	68.5	66.2	68.5	67.7333	1.32791
590500	65.4	57.8	59.5	60.9	3.98873
591000	66.7	55.9	59.5	60.7	5.49909
591500	67.1	61.3	61.3	63.2333	3.34863
592000	61.7	59.9	59.9	60.5	1.03923
592500	70.4	64.9	70.4	68.5667	3.17543
593000	68	62.1	64.1	64.7333	3.00056
593500	75.2	73.5	73.5	74.0667	0.981495
594000	63.7	59.5	61.7	61.6333	2.10079
594500	60.2	59.5	59.5	59.7333	0.404145
595000	64.9	58.8	61	61.5667	3.08923
595500	55.9	49.8	53.5	53.0667	3.073
596000	87	79.4	81.3	82.5667	3.95517
596500	75.2	65.8	65.8	68.9333	5.42709
597000	69.9	64.5	66.2	66.8667	2.76104
597500	78.7	78.7	78.7	78.7	0
598000	63.3	59.2	59.2	60.5667	2.36714
598500	95.2	81.3	85.5	87.3333	7.12905
599000	65.4	61.3	63.3	63.3333	2.0502
599500	70.9	66.7	70.4	69.3333	2.2942
600000	80.6	76.9	76.9	78.1333	2.1362
600500	63.7	63.7	63.7	63.7	8.70234e-15
601000	67.1	67.1	67.1	67.1	0
601500	68.5	68.5	68.5	68.5	0
602000	71.4	69.4	69.4	70.0667	1.1547
602500	80.6	73	76.9	76.8333	3.80044
603000	68.5	62.9	64.9	65.4333	2.83784
603500	61.7	55.9	57.8	58.4667	2.95691
604000	62.9	60.6	60.6	61.3667	1.32791
604500	64.5	61	61	62.1667	2.02073
605000	79.4	77.5	77.5	78.1333	1.09697
605500	78.1	68.5	70.4	72.3333	5.08363
606000	69	61.3	63.3	64.5333	3.99541
606500	75.2	71.9	75.2	74.1	1.90526
607000	77.5	73.5	73.5	74.8333	2.3094
607500	66.7	62.5	64.5	64.5667	2.10079
608000	71.4	67.1	67.1	68.5333	2.48261
608500	76.9	75.2	75.2	75.7667	0.981495
609000	68	66.2	68	67.4	1.03923
609500	71.9	68	70.4	70.1	1.96723
610000	82	70.4	71.9	74.7667	6.30899
610500	65.8	63.7	63.7	64.4	1.21244
611000	69.4	67.6	67.6	68.2	1.03923
611500	63.7	63.7	63.7	63.7	8.70234e-15
612000	67.1	65.4	67.1	66.5333	0.981495
612500	77.5	71.4	71.4	73.4333	3.52184
613000	75.2	65.8	71.4	70.8	4.72864
613500	78.7	76.3	76.3	77.1	1.38564
614000	66.7	59.5	61.3	62.5	3.747
614500	58.8	54.9	54.9	56.2	2.25167
615000	86.2	82.6	84.7	84.5	1.80831
615500	72.5	64.1	64.1	66.9	4.84974
616000	64.1	64.1	64.1	64.1	0
616500	69.4	61.7	63.7	64.9333	3.99541
617000	63.3	57.1	59.2	59.8667	3.15331
617500	79.4	69.4	69.4	72.7333	5.7735
618000	76.3	73	74.6	74.6333	1.65025
618500	60.2	54.6	58.5	57.7667	2.87112
619000	58.5	58.5	58.5	58.5	0
619500	73	70.9	70.9	71.6	1.21244
620000	77.5	75.2	75.2	75.9667	1.32791
620500	72.5	64.5	66.7	67.9	4.1328
621000	78.1	74.1	75.8	76	2.00749
621500	69	65.4	65.4	66.6	2.07846
622000	76.3	72.5	72.5	73.7667	2.19393
622500	72.5	66.2	68.5	69.0667	3.188
623000	70.9	69	69	69.6333	1.09697
623500	73.5	67.6	69.4	70.1667	3.02379
624000	91.7	86.2	86.2	88.0333	3.17543
624500	71.4	63.7	65.8	66.9667	3.98037
625000	84	75.8	77.5	79.1	4.32782
625500	67.1	61.7	63.7	64.1667	2.73008
626000	65.4	57.8	59.9	61.0333	3.92471
626500	71.4	69.4	69.4	70.0667	1.1547
627000	76.9	69.4	71.4	72.5667	3.88373
627500	76.3	72.5	72.5	73.7667	2.19393
628000	69.9	61.3	62.9	64.7	4.57384
628500	69.9	68	68	68.6333	1.09697
629000	75.8	75.8	75.8	75.8	0
629500	71.9	66.2	66.2	68.1	3.2909
630000	77.5	77.5	77.5	77.5	0
630500	69	67.1	69	68.3667	1.09697
631000	79.4	73	73	75.1333	3.69504
631500	75.8	68	68	70.6	4.50333
632000	77.5	74.6	74.6	75.5667	1.67432
632500	65.4	63.3	63.3	64	1.21244
633000	77.5	71.4	71.4	73.4333	3.52184
633500	69.4	62.9	62.9	65.0667	3.75278
634000	75.8	75.8	75.8	75.8	0
634500	71.4	71.4	71.4	71.4	0
635000	73.5	65.8	68	69.1	3.96611
635500	68	59.9	61.7	63.2	4.25323
636000	69.4	63.3	65.4	66.0333	3.09892
636500	67.1	59.5	61.3	62.6333	3.97157
637000	66.7	63.3	63.3	64.4333	1.96299
637500	75.2	65.8	67.6	69.5333	4.98932
638000	63.7	59.5	59.5	60.9	2.42487
638500	64.5	64.5	64.5	64.5	0
639000	64.1	62.1	64.1	63.4333	1.1547
639500	71.4	69.4	69.4	70.0667	1.1547
640000	89.3	81.3	81.3	83.9667	4.6188
640500	66.7	62.9	64.5	64.7	1.90788
641000	66.7	66.7	66.7	66.7	0
641500	84.7	76.9	78.7	80.1	4.08412
642000	71.4	69.4	69.4	70.0667	1.1547
642500	71.9	68	68	69.3	2.25167
643000	64.5	60.6	60.6	61.9	2.25167
643500	66.7	62.9	64.9	64.8333	1.90088
644000	72.5	70.4	70.4	71.1	1.21244
644500	66.2	66.2	66.2	66.2	0
645000	84	80	80	81.3333	2.3094
645500	56.8	51.5	53.5	53.9333	2.67644
646000	66.7	58.8	58.8	61.4333	4.56107
646500	76.9	69.4	71.4	72.5667	3.88373
647000	62.5	57.1	57.1	58.9	3.11769
647500	67.1	65.4	67.1	66.5333	0.981495
648000	74.6	65.4	67.1	69.0333	4.89524
648500	78.1	70.4	72.5	73.6667	3.98037
649000	71.9	64.1	66.2	67.4	4.03609
649500	69.4	59.5	61.7	63.5333	5.1984
650000	69.4	63.3	65.4	66.0333	3.09892
650500	67.6	61	67.6	65.4	3.81051
651000	75.2	69.4	70.9	71.8333	3.01054
651500	71.9	71.9	71.9	71.9	0
652000	62.9	56.8	61	60.2333	3.12143
652500	75.8	68.5	68.5	70.9333	4.21466
653000	68	64.1	64.1	65.4	2.25167
653500	70.9	67.1	67.1	68.3667	2.19393
654000	69.4	61.3	63.3	64.6667	4.2194
654500	73	65.4	65.4	67.9333	4.38786
655000	80	69.9	69.9	73.2667	5.83124
655500	73.5	71.4	71.4	72.1	1.21244
656000	68	66.2	66.2	66.8	1.03923
656500	55.6	53.5	53.5	54.2	1.21244
657000	79.4	79.4	79.4	79.4	0
657500	61.7	57.8	57.8	59.1	2.25167
658000	84	80	82	82	2
658500	66.7	60.6	62.5	63.2667	3.12143
659000	71.9	68	68	69.3	2.25167
659500	73	67.1	69	69.7	3.01164
660000	82.6	69.9	69.9	74.1333	7.33235
660500	64.1	60.2	60.2	61.5	2.25167
661000	74.1	69	70.9	71.3333	2.57747
661500	74.6	70.9	70.9	72.1333	2.1362
662000	70.9	69	69	69.6333	1.09697
662500	64.5	62.5	62.5	63.1667	1.1547
663000	81.3	71.4	77.5	76.7333	4.99433
663500	59.9	55.9	57.8	57.8667	2.00083
664000	82.6	78.7	78.7	80	2.25167
664500	57.5	56.5	56.5	56.8333	0.57735
665000	63.3	61.3	61.3	61.9667	1.1547
665500	73.5	68	68	69.8333	3.17543
666000	74.1	68.5	70.4	71	2.84781
666500	58.1	56.5	56.5	57.0333	0.92376
667000	76.3	69	72.5	72.6	3.65103
667500	69	67.1	67.1	67.7333	1.09697
668000	68.5	64.1	66.2	66.2667	2.20076
668500	62.9	56.5	56.5	58.6333	3.69504
669000	60.2	58.5	58.5	59.0667	0.981495
669500	83.3	79.4	81.3	81.3333	1.95021
670000	71.9	71.9	71.9	71.9	0
670500	66.2	58.8	62.5	62.5	3.7
671000	63.3	59.5	63.3	62.0333	2.19393
671500	64.5	60.6	62.5	62.5333	1.95021
672000	75.8	68	74.1	72.6333	4.10163
672500	76.9	75.2	75.2	75.7667	0.981495
673000	70.9	62.9	62.9	65.5667	4.6188
673500	78.7	70.9	70.9	73.5	4.50333
674000	74.6	66.7	69	70.1	4.06325
674500	71.4	67.1	67.1	68.5333	2.48261
675000	71.4	71.4	71.4	71.4	0
675500	84.7	80.6	82.6	82.6333	2.0502
676000	79.4	77.5	77.5	78.1333	1.09697
676500	74.6	69	69	70.8667	3.23316
677000	69.4	64.9	64.9	66.4	2.59808
677500	69.4	62.1	64.1	65.2	3.77227
678000	75.2	73	73	73.7333	1.27017
678500	86.2	75.8	77.5	79.8333	5.57883
679000	68.5	64.5	64.5	65.8333	2.3094
679500	62.9	58.8	61	60.9	2.05183
680000	72.5	65.4	69	68.9667	3.55012
680500	65.4	61.3	63.3	63.3333	2.0502
681000	65.4	60.2	61.7	62.4333	2.67644
681500	71.4	69.4	71.4	70.7333	1.1547
682000	78.7	76.9	76.9	77.5	1.03923
682500	75.2	69.4	73	72.5333	2.92803
683000	66.2	54.9	58.8	59.9667	5.73963
683500	76.3	69	69	71.4333	4.21466
684000	68.5	62.5	62.5	64.5	3.4641
684500	72.5	66.7	68.5	69.2333	2.96873
685000	75.8	67.1	69	70.6333	4.5742
685500	73.5	73.5	73.5	73.5	0
686000	78.7	69	70.9	72.8667	5.14036
686500	64.1	63.3	63.3	63.5667	0.46188
687000	68	64.1	64.1	65.4	2.25167
687500	72.5	64.5	68.5	68.5	4
688000	73.5	71.4	71.4	72.1	1.21244
688500	82	75.8	78.1	78.6333	3.13422
689000	60.6	56.8	58.8	58.7333	1.90088
689500	72.5	66.7	72.5	70.5667	3.34863
690000	65.4	63.3	63.3	64	1.21244
690500	79.4	73.5	73.5	75.4667	3.40637
691000	64.9	58.8	61	61.5667	3.08923
691500	92.6	76.9	80.6	83.3667	8.20752
692000	63.3	61.3	61.3	61.9667	1.1547
692500	82	80	80	80.6667	1.1547
693000	83.3	79.4	79.4	80.7	2.25167
693500	69	63.7	63.7	65.4667	3.05996
694000	82	71.9	77.5	77.1333	5.05997
694500	66.2	65.4	65.4	65.6667	0.46188
695000	78.7	69	70.9	72.8667	5.14036
695500	82	75.8	77.5	78.4333	3.20364
696000	73.5	71.4	71.4	72.1	1.21244
696500	70.9	69	69	69.6333	1.09697
697000	82	78.1	80	80.0333	1.95021
697500	87	81.3	85.5	84.6	2.95466
698000	80.6	73	76.9	76.8333	3.80044
698500	75.2	67.1	69	70.4333	4.23596
699000	69.4	62.1	65.8	65.7667	3.65011
699500	79.4	74.1	77.5	77	2.68514
700000	75.8	74.1	75.8	75.2333	0.981495
700500	94.3	86.2	90.1	90.2	4.05093
701000	60.6	56.5	60.6	59.2333	2.36714
701500	87.7	81.3	81.3	83.4333	3.69504
702000	76.3	70.4	74.6	73.7667	3.03699
702500	75.2	69.4	71.4	72	2.94618
703000	82.6	76.9	76.9	78.8	3.2909
703500	84.7	80.6	84.7	83.3333	2.36714
704000	85.5	73.5	78.1	79.0333	6.0542
704500	72.5	64.5	68.5	68.5	4
705000	74.6	66.7	70.9	70.7333	3.95264
705500	75.2	71.9	71.9	73	1.90526
706000	79.4	73.5	75.8	76.2333	2.97377
706500	80	77.5	77.5	78.3333	1.44338
707000	74.1	68	71.9	71.3333	3.08923
707500	69.4	65.8	65.8	67	2.07846
708000	72.5	59.2	62.9	64.8667	6.86464
708500	90.9	82	85.5	86.1333	4.48367
709000	73.5	63.7	67.6	68.2667	4.9339
709500	87	82.6	84.7	84.7667	2.20076
710000	72.5	66.7	70.4	69.8667	2.93655
710500	82.6	70.9	70.9	74.8	6.755
711000	76.9	72.5	75.8	75.0667	2.28983
711500	74.1	66.2	68.5	69.6	4.06325
712000	89.3	78.1	82	83.1333	5.68536
712500	79.4	73	76.9	76.4333	3.22542
713000	62.5	58.8	60.6	60.6333	1.85023
713500	84.7	74.6	80.6	79.9667	5.0797
714000	76.3	70.9	74.6	73.9333	2.76104
714500	79.4	77.5	79.4	78.7667	1.09697
715000	71.9	68	68	69.3	2.25167
715500	76.3	68.5	74.6	73.1333	4.10163
716000	80.6	76.9	80.6	79.3667	2.1362
716500	80	68	74.1	74.0333	6.00028
717000	65.8	65.8	65.8	65.8	0
717500	85.5	73.5	79.4	79.4667	6.00028
718000	68	59.9	68	65.3	4.67654
718500	71.4	65.8	67.6	68.2667	2.8589
719000	80.6	80.6	80.6	80.6	0
719500	74.6	68.5	72.5	71.8667	3.09892
720000	91.7	82	84	85.9	5.12152
720500	67.6	57.8	61.7	62.3667	4.9339
721000	75.8	73.5	73.5	74.2667	1.32791
721500	72.5	70.4	72.5	71.8	1.21244
722000	87.7	78.1	80	81.9333	5.08363
722500	68.5	66.7	68.5	67.9	1.03923
723000	78.7	76.9	76.9	77.5	1.03923
723500	81.3	72.5	77.5	77.1	4.41362
724000	83.3	75.2	83.3	80.6	4.67654
724500	78.1	71.9	78.1	76.0333	3.57957
725000	88.5	80	86.2	84.9	4.39659
725500	70.9	62.1	67.6	66.8667	4.4456
726000	70.9	59.2	65.4	65.1667	5.85349
726500	84.7	73	78.7	78.8	5.85064
727000	87	87	87	87	0
727500	78.1	69.4	71.4	72.9667	4.55668
728000	84	74.1	76.3	78.1333	5.1984
728500	65.4	63.3	65.4	64.7	1.21244
729000	80.6	71.4	74.6	75.5333	4.67047
729500	71.4	65.4	69.4	68.7333	3.05505
730000	69	59.2	67.1	65.1	5.19711
730500	88.5	82	84	84.8333	3.32916
731000	87.7	71.9	82	80.5333	8.00146
731500	79.4	58.8	67.6	68.6	10.3363
732000	83.3	64.1	77.5	74.9667	9.8475
732500	85.5	67.1	76.9	76.5	9.20652
733000	81.3	63.7	75.2	73.4	8.937
733500	83.3	69.4	73.5	75.4	7.14213
734000	86.2	71.4	75.2	77.6	7.68635
734500	92.6	78.7	80.6	83.9667	7.5368
735000	76.3	74.6	76.3	75.7333	0.981495
735500	76.3	66.7	76.3	73.1	5.54256
736000	82.6	62.1	69.4	71.3667	10.3905
736500	95.2	87.7	91.7	91.5333	3.75278
737000	77.5	63.7	69.4	70.2	6.9347
737500	83.3	69.4	79.4	77.3667	7.16961
738000	68.5	58.1	62.5	63.0333	5.22047
738500	84.7	69	76.9	76.8667	7.85005
739000	74.6	62.9	64.9	67.4667	6.25806
739500	78.7	65.8	69.4	71.3	6.65658
740000	79.4	53.5	73.5	68.8	13.5746
740500	88.5	69	80.6	79.3667	9.80833
741000	103.1	67.6	90.1	86.9333	17.9606
741500	74.1	54.1	57.8	62	10.641
742000	96.2	76.3	91.7	88.0667	10.4357
742500	69.9	50.5	58.5	59.6333	9.74953
743000	92.6	61.3	76.9	76.9333	15.65
743500	78.1	64.1	69.9	70.7	7.0342
744000	64.9	55.2	61	60.3667	4.88092
744500	77.5	61.7	71.9	70.3667	8.01083
745000	89.3	74.6	82	81.9667	7.35006
745500	81.3	67.6	71.4	73.4333	7.07272
746000	69.9	55.9	68.5	64.7667	7.7106
746500	80	64.9	76.3	73.7333	7.87041
747000	87	67.1	81.3	78.4667	10.2481
747500	81.3	52.1	67.6	67	14.6092
748000	76.9	71.4	74.6	74.3	2.76225
748500	82	62.9	80	74.9667	10.4978
749000	75.2	58.5	73	68.9	9.07359
749500	96.2	76.3	86.2	86.2333	9.95004
750000	80	59.9	73.5	71.1333	10.2569
750500	96.2	73.5	84	84.5667	11.3606
751000	76.3	58.5	68	67.6	8.90674
751500	100	84	90.1	91.3667	8.07486
752000	78.1	58.8	74.1	70.3333	10.1864
752500	82	69.4	78.7	76.7	6.53376
753000	89.3	69	85.5	81.2667	10.7918
753500	82	62.1	74.1	72.7333	10.0201
754000	67.6	45.5	53.5	55.5333	11.1894
754500	92.6	76.9	84.7	84.7333	7.85005
755000	91.7	73.5	87.7	84.3	9.56452
755500	82.6	64.9	75.2	74.2333	8.88951
756000	76.3	61	70.4	69.2333	7.71643
756500	67.1	51.5	58.1	58.9	7.83071
757000	88.5	55.9	71.4	71.9333	16.3065
757500	75.8	53.2	68.5	65.8333	11.5336
758000	70.4	47.6	64.9	60.9667	11.898
758500	77.5	66.7	73.5	72.5667	5.46016
759000	90.1	67.1	82	79.7333	11.6663
759500	85.5	69.9	81.3	78.9	8.07217
760000	107.5	74.1	87.7	89.7667	16.7956
760500	90.1	68.5	78.1	78.9	10.8222
761000	79.4	60.6	75.8	71.9333	9.97864
761500	80	60.6	66.2	68.9333	9.98465
762000	92.6	61	78.7	77.4333	15.838
762500	92.6	56.8	74.1	74.5	17.9034
763000	87	59.2	73	73.0667	13.9001
763500	82.6	68.5	74.6	75.2333	7.0713
764000	79.4	57.8	71.4	69.5333	10.9203
764500	76.9	51.5	69	65.8	12.9988
765000	86.2	72.5	82	80.2333	7.01878
765500	90.1	62.5	80	77.5333	13.9644
766000	83.3	53.2	69.9	68.8	15.0801
766500	80	56.5	72.5	69.6667	12.0035
767000	87.7	58.1	76.3	74.0333	14.9296
767500	80.6	61.7	73	71.7667	9.51017
768000	82.6	61.7	75.2	73.1667	10.5973
768500	74.1	56.5	68	66.2	8.937
769000	84.7	61.7	73	73.1333	11.5006
769500	82.6	58.1	73	71.2333	12.3452
770000	76.3	52.6	68	65.6333	12.0259
770500	80.6	56.2	75.2	70.6667	12.8161
771000	83.3	48.3	71.4	67.6667	17.7962
771500	75.8	44.4	59.2	59.8	15.7086
772000	96.2	64.1	85.5	81.9333	16.3445
772500	95.2	54.6	70.4	73.4	20.4656
773000	78.7	51.3	73	67.6667	14.4576
773500	94.3	67.6	84.7	82.2	13.5244
774000	84	60.6	74.6	73.0667	11.7751
774500	80	56.5	66.2	67.5667	11.8095
775000	88.5	64.5	74.6	75.8667	12.05
775500	86.2	62.5	72.5	73.7333	11.898
776000	70.4	51	60.6	60.6667	9.70017
776500	89.3	51	80	73.4333	19.9766
777000	82	52.6	72.5	69.0333	15.0034
777500	83.3	58.8	73.5	71.8667	12.3314
778000	78.1	65.4	70.9	71.4667	6.36894
778500	87.7	63.7	82	77.8	12.5391
779000	69.4	58.1	69.4	65.6333	6.52406
779500	81.3	51.5	61.3	64.7	15.1882
780000	70.9	57.8	65.4	64.7	6.57799
780500	84	62.5	72.5	73	10.7587
781000	90.9	43.3	77.5	70.5667	24.5457
781500	79.4	40.7	69.4	63.1667	20.0889
782000	90.1	52.9	78.1	73.7	18.9863
782500	81.3	47.4	69	65.9	17.1613
783000	95.2	49.5	77.5	74.0667	23.0426
783500	69.4	44.2	63.7	59.1	13.2148
784000	87.7	58.5	78.7	74.9667	14.9537
784500	74.1	47.8	61.3	61.0667	13.1516
785000	78.1	51.8	68	65.9667	13.2674
785500	84	57.8	70.9	70.9	13.1
786000	76.9	52.1	69	66	12.6693
786500	84.7	49.5	81.3	71.8333	19.4158
787000	89.3	59.2	76.9	75.1333	15.1276
787500	85.5	53.8	63.7	67.6667	16.218
788000	86.2	61	74.6	73.9333	12.6132
788500	83.3	55.6	77.5	72.1333	14.609
789000	86.2	50.8	76.3	71.1	18.2639
789500	80	53.8	67.1	66.9667	13.1005
790000	80.6	47.4	64.1	64.0333	16.6001
790500	89.3	61	80.6	76.9667	14.4956
791000	90.9	64.9	82.6	79.4667	13.2802
791500	69	35.5	51.3	51.9333	16.759
792000	71.9	43.1	55.6	56.8667	14.4417
792500	87	54.9	73.5	71.8	16.1174
793000	81.3	59.2	70.9	70.4667	11.0564
793500	87	48.3	67.6	67.6333	19.35
794000	84.7	59.2	76.9	73.6	13.0664
794500	77.5	53.8	69.9	67.0667	12.1014
795000	68.5	51	62.9	60.8	8.937
795500	80.6	61.3	76.9	72.9333	10.2432
796000	75.2	47.6	56.8	59.8667	14.0532
796500	80.6	58.1	76.3	71.6667	11.9442
797000	71.4	53.8	60.2	61.8	8.90842
797500	86.2	57.5	67.1	70.2667	14.6097
798000	71.4	50.5	63.7	61.8667	10.5699
798500	79.4	38	65.4	60.9333	21.0583
799000	86.2	52.4	78.7	72.4333	17.75
799500	69	40.2	57.5	55.5667	14.497
800000	86.2	54.9	82	74.3667	16.9889
800500	82	56.5	78.1	72.2	13.7357
801000	84	58.5	78.1	73.5333	13.3493
801500	79.4	49	71.4	66.6	15.7582
802000	70.4	56.8	64.5	63.9	6.81982
802500	83.3	62.9	72.5	72.9	10.2059
803000	75.2	53.8	71.4	66.8	11.4175
803500	72.5	53.2	62.9	62.8667	9.65004
804000	82	59.9	74.6	72.1667	11.2491
804500	84.7	61.3	73	73	11.7
805000	90.1	58.1	80	76.0667	16.3586
805500	69.9	47.2	62.5	59.8667	11.5768
806000	80	58.8	74.1	70.9667	10.9418
806500	92.6	61.3	78.7	77.5333	15.6826
807000	81.3	65.4	75.2	73.9667	8.02143
807500	94.3	56.2	81.3	77.2667	19.3676
808000	86.2	49	74.6	69.9333	19.034
808500	80.6	57.5	70.9	69.6667	11.5993
809000	77.5	46.9	69.4	64.6	15.8547
809500	75.8	54.3	67.6	65.9	10.8503
810000	71.9	53.2	62.5	62.5333	9.35004
810500	79.4	59.5	77.5	72.1333	10.982
811000	88.5	64.9	87	80.1333	13.2138
811500	81.3	57.1	75.8	71.4	12.6858
812000	73	57.5	67.6	66.0333	7.86787
812500	78.7	56.2	71.4	68.7667	11.4788
813000	73.5	49.8	61.7	61.6667	11.85
813500	64.9	55.6	61	60.5	4.67012
814000	98	74.1	84.7	85.6	11.9754
814500	85.5	63.3	81.3	76.7	11.7932
815000	90.1	67.6	77.5	78.4	11.277
815500	80	57.8	69	68.9333	11.1002
816000	74.1	49.3	64.1	62.5	12.4772
816500	76.9	51	67.6	65.1667	13.1203
817000	82	55.9	71.9	69.9333	13.1607
817500	77.5	55.9	71.9	68.4333	11.2095
818000	83.3	61	72.5	72.2667	11.1518
818500	80	46.9	68.5	65.1333	16.8049
819000	73	61	69	67.6667	6.1101
819500	92.6	71.9	87	83.8333	10.7072
820000	96.2	60.6	90.1	82.3	19.0386
820500	82.6	52.6	64.9	66.7	15.0808
821000	92.6	68	77.5	79.3667	12.4058
821500	64.5	39.7	53.2	52.4667	12.4163
822000	90.1	58.8	78.7	75.8667	15.8412
822500	102	62.1	91.7	85.2667	20.7134
823000	82	62.9	74.6	73.1667	9.63033
823500	87	69	78.7	78.2333	9.00907
824000	74.1	57.1	68.5	66.5667	8.66333
824500	75.2	56.2	67.6	66.3333	9.56312
825000	71.9	52.9	66.2	63.6667	9.75004
825500	90.9	58.1	79.4	76.1333	16.6422
826000	87	66.7	82.6	78.7667	10.6791
826500	93.5	58.5	80	77.3333	17.6517
827000	67.6	49.5	63.3	60.1333	9.45639
827500	78.7	55.6	76.9	70.4	12.8487
828000	67.6	45.7	59.5	57.6	11.0729
828500	105.3	70.4	87.7	87.8	17.4502
829000	78.7	62.1	69.4	70.0667	8.32006
829500	85.5	60.2	82	75.9	13.7088
830000	80.6	61.7	76.9	73.0667	10.0162
830500	96.2	68.5	81.3	82	13.8633
831000	82	51.3	72.5	68.6	15.7172
831500	64.9	47.6	62.9	58.4667	9.46379
832000	104.2	82	96.2	94.1333	11.2434
832500	98	63.7	89.3	83.6667	17.8304
833000	78.1	65.4	71.9	71.8	6.35059
833500	88.5	64.5	84.7	79.2333	12.9001
834000	90.1	70.4	82	80.8333	9.90168
834500	85.5	64.5	75.8	75.2667	10.5102
835000	89.3	66.7	79.4	78.4667	11.3289
835500	81.3	52.9	64.5	66.2333	14.2791
836000	96.2	67.6	85.5	83.1	14.4503
836500	82.6	55.9	70.9	69.8	13.3839
837000	84	68	78.1	76.7	8.09135
837500	83.3	53.5	67.1	67.9667	14.9189
838000	81.3	53.8	63.7	66.2667	13.9285
838500	96.2	69.9	85.5	83.8667	13.2259
839000	68	59.9	63.7	63.8667	4.05257
839500	70.4	47.6	66.7	61.5667	12.2361
840000	83.3	65.8	79.4	76.1667	9.18713
840500	90.1	60.6	78.7	76.4667	14.8763
841000	84.7	53.8	70.9	69.8	15.4793
841500	84	60.2	76.3	73.5	12.1445
842000	91.7	70.9	80.6	81.0667	10.4078
842500	84	66.7	80	76.9	9.05704
843000	80.6	56.5	71.4	69.5	12.1618
843500	84	52.1	70.4	68.8333	16.0076
844000	96.2	61	84.7	80.6333	17.9489
844500	80.6	65.4	73	73	7.6
845000	82.6	62.1	75.2	73.3	10.3812
845500	81.3	56.8	69.9	69.3333	12.2598
846000	76.9	62.5	75.2	71.5333	7.86914
846500	102	75.8	91.7	89.8333	13.1994
847000	88.5	66.7	78.7	77.9667	10.9185
847500	72.5	57.5	67.1	65.7	7.59737
848000	74.1	61.3	69.9	68.4333	6.52482
848500	95.2	65.8	85.5	82.1667	14.9808
849000	78.1	52.9	74.1	68.3667	13.543
849500	94.3	80	87.7	87.3333	7.15705
850000	84.7	62.9	80.6	76.0667	11.5855
850500	75.2	61.3	69.4	68.6333	6.98164
851000	86.2	60.6	74.1	73.6333	12.8064
851500	98	78.1	84	86.7	10.2211
852000	77.5	60.2	71.9	69.8667	8.82742
852500	92.6	67.1	84.7	81.4667	13.0539
853000	80	59.2	72.5	70.5667	10.5339
853500	88.5	46.3	76.3	70.3667	21.7167
854000	75.8	59.9	71.9	69.2	8.28674
854500	71.4	55.9	69.4	65.5667	8.43109
855000	79.4	52.1	66.7	66.0667	13.661
855500	75.8	58.8	69.9	68.1667	8.63153
856000	73	46.3	63.7	61	13.5532
856500	68.5	53.2	64.5	62.0667	7.93494
857000	87.7	69.4	82.6	79.9	9.44405
857500	75.2	53.8	70.9	66.6333	11.32
858000	100	68.5	94.3	87.6	16.7848
858500	76.3	52.6	64.5	64.4667	11.85
859000	101	81.3	89.3	90.5333	9.90774
859500	74.1	62.5	70.4	69	5.92537
860000	80	59.9	66.2	68.7	10.2806
860500	94.3	67.1	80.6	80.6667	13.6001
861000	76.3	56.2	68	66.8333	10.1007
861500	83.3	58.1	77.5	72.9667	13.1975
862000	70.4	52.1	61	61.1667	9.15114
862500	77.5	58.1	69.9	68.5	9.77548
863000	84.7	65.8	71.4	73.9667	9.7079
863500	76.9	62.9	75.2	71.6667	7.63959
864000	64.1	50.8	58.5	57.8	6.67757
864500	88.5	69	82.6	80.0333	10.0002
865000	85.5	61.7	73.5	73.5667	11.9001
865500	88.5	66.7	84.7	79.9667	11.6453
866000	66.7	56.8	62.9	62.1333	4.99433
866500	83.3	60.6	71.9	71.9333	11.35
867000	75.8	62.1	69.9	69.2667	6.87192
867500	103.1	62.9	87	84.3333	20.2322
868000	88.5	64.9	80.6	78	12.0129
868500	78.7	61	76.9	72.2	9.74115
869000	92.6	64.5	84.7	80.6	14.4917
869500	81.3	60.6	75.8	72.5667	10.7221
870000	70.4	56.2	62.5	63.0333	7.11501
870500	93.5	59.5	81.3	78.1	17.2244
871000	84.7	53.5	67.6	68.6	15.624
871500	80	55.9	70.4	68.7667	12.1327
872000	76.9	53.2	74.6	68.2333	13.0699
872500	85.5	52.4	73.5	70.4667	16.7572
873000	80.6	56.5	71.4	69.5	12.1618
873500	68	48.8	62.1	59.6333	9.8348
874000	84	49	73.5	68.8333	17.9606
874500	87.7	62.5	83.3	77.8333	13.4601
875000	84.7	63.3	76.9	74.9667	10.8302
875500	94.3	67.1	84.7	82.0333	13.7947
876000	74.1	46.9	66.2	62.4	13.9925
876500	78.7	57.1	67.1	67.6333	10.8099
877000	85.5	56.8	79.4	73.9	15.1199
877500	89.3	59.2	79.4	75.9667	15.3409
878000	75.2	61.7	70.9	69.2667	6.89662
878500	87.7	53.5	72.5	71.2333	17.1351
879000	81.3	68	75.8	75.0333	6.68306
879500	89.3	68	78.1	78.4667	10.6547
880000	89.3	66.7	82	79.3333	11.5336
880500	88.5	72.5	84	81.6667	8.25126
881000	91.7	58.5	82	77.4	17.0713
881500	69.4	55.6	67.6	64.2	7.502
882000	80.6	56.5	74.6	70.5667	12.546
882500	78.7	50.8	74.6	68.0333	15.0646
883000	86.2	65.4	76.3	75.9667	10.404
883500	68	40.3	58.8	55.7	14.1078
884000	90.1	57.1	72.5	73.2333	16.5122
884500	82.6	60.6	71.9	71.7	11.0014
885000	74.1	41.2	63.7	59.6667	16.8168
885500	87.7	69.9	85.5	81.0333	9.70429
886000	82	63.3	78.1	74.4667	9.86526
886500	80.6	59.5	72.5	70.8667	10.6444
887000	67.1	50.8	64.1	60.6667	8.67544
887500	82.6	56.8	72.5	70.6333	13.0009
888000	95.2	63.7	85.5	81.4667	16.1327
888500	69.9	37.9	59.5	55.7667	16.3234
889000	90.9	67.6	80.6	79.7	11.676
889500	85.5	61.7	75.8	74.3333	11.9676
890000	80	46.7	69.9	65.5333	17.0741
890500	93.5	63.7	79.4	78.8667	14.9072
891000	82.6	65.8	78.7	75.7	8.79261
891500	81.3	57.8	71.4	70.1667	11.7984
892000	82.6	51.3	65.8	66.5667	15.6641
892500	76.3	62.5	71.9	70.2333	7.04935
893000	90.9	63.7	83.3	79.3	14.0342
893500	77.5	53.5	59.9	63.6333	12.4279
894000	98	58.8	82.6	79.8	19.7494
894500	69.9	42.6	61	57.8333	13.9228
895000	88.5	58.8	74.6	73.9667	14.8601
895500	75.2	57.5	71.4	68.0333	9.3179
896000	82.6	57.5	70.9	70.3333	12.5596
896500	83.3	63.7	76.3	74.4333	9.93244
897000	87.7	62.9	76.3	75.6333	12.4134
897500	75.2	52.6	71.4	66.4	12.1012
898000	97.1	59.9	83.3	80.1	18.8053
898500	100	61	82.6	81.2	19.5377
899000	79.4	55.6	65.8	66.9333	11.9404
899500	91.7	61.7	78.7	77.3667	15.0444
900000	85.5	58.8	75.8	73.3667	13.5153
900500	79.4	46.3	65.8	63.8333	16.6374
901000	84.7	43.3	64.9	64.3	20.7065
901500	67.6	43.5	61.3	57.4667	12.4989
902000	77.5	33.6	64.5	58.5333	22.55
902500	82	41	68.5	63.8333	20.8946
903000	91.7	49.5	73	71.4	21.1454
903500	68	47.6	60.2	58.6	10.2937
904000	76.9	49.8	73	66.5667	14.6507
904500	70.9	48.1	61.3	60.1	11.4473
905000	76.9	54.9	64.5	65.4333	11.0297
905500	79.4	52.9	68	66.7667	13.293
906000	63.3	35.5	55.2	51.3333	14.2977
906500	74.6	31.8	62.5	56.3	22.0633
907000	82	49.5	66.7	66.0667	16.2593
907500	64.1	44.8	52.1	53.6667	9.74491
908000	73	50.8	65.8	63.2	11.3261
908500	78.7	41.2	56.5	58.8	18.8555
909000	80.6	43.9	69.4	64.6333	18.8086
909500	91.7	52.9	75.8	73.4667	19.505
910000	76.9	40.5	63.3	60.2333	18.3928
910500	70.4	36.5	62.5	56.4667	17.7371
911000	74.6	43.9	62.1	60.2	15.4379
911500	62.5	39.2	57.8	53.1667	12.3217
912000	82.6	49	73	68.2	17.3066
912500	84	56.5	72.5	71	13.8112
913000	79.4	44.1	58.1	60.5333	17.7754
913500	79.4	41.2	65.8	62.1333	19.3622
914000	71.9	38.9	64.1	58.3	17.2476
914500	71.9	40	56.5	56.1333	15.9532
915000	80.6	45.9	63.3	63.2667	17.35
915500	66.7	33.6	54.9	51.7333	16.7757
916000	86.2	45.7	66.7	66.2	20.2546
916500	79.4	55.2	67.6	67.4	12.1012
917000	63.7	39.8	53.8	52.4333	12.0085
917500	89.3	53.2	75.2	72.5667	18.1935
918000	71.9	41.7	61	58.2	15.2935
918500	75.8	33.3	60.6	56.5667	21.5352
919000	64.1	39.8	49.3	51.0667	12.246
919500	71.4	40.8	63.3	58.5	15.8547
920000	76.3	38.3	59.5	58.0333	19.0424
920500	78.1	45	65.8	62.9667	16.7309
921000	69	38.3	57.1	54.8	15.4787
921500	73	44.8	67.1	61.6333	14.8736
922000	71.9	38.8	54.3	55	16.5611
922500	86.2	47.6	62.9	65.5667	19.4377
923000	69	45.7	57.5	57.4	11.6503
923500	80.6	50	70.4	67	15.5808
924000	66.2	44.6	59.2	56.6667	11.0206
924500	80.6	47.4	76.3	68.1	18.0552
925000	86.2	50.3	79.4	71.9667	19.0694
925500	78.7	52.9	70.9	67.5	13.2318
926000	84.7	49.3	69.9	67.9667	17.779
926500	82.6	38.3	58.5	59.8	22.1786
927000	69	39.2	47.2	51.8	15.4234
927500	80	52.6	70.4	67.6667	13.903
928000	64.9	47.6	61	57.8333	9.07432
928500	75.2	49.8	65.8	63.6	12.8421
929000	57.8	45.7	57.8	53.7667	6.98594
929500	88.5	58.1	73	73.2	15.201
930000	86.2	63.7	75.2	75.0333	11.2509
930500	79.4	45.7	67.6	64.2333	17.1004
931000	71.9	28.9	52.9	51.2333	21.5484
931500	72.5	37.7	61	57.0667	17.7303
932000	83.3	46.1	73.5	67.6333	19.2814
932500	73	38	58.5	56.5	17.5855
933000	101	61.3	87	83.1	20.1353
933500	67.1	36.6	53.2	52.3	15.2699
934000	76.9	48.1	61.3	62.1	14.4167
934500	69.9	41.5	51	54.1333	14.4569
935000	76.9	37.3	65.4	59.8667	20.3716
935500	82.6	40.8	54.9	59.4333	21.2655
936000	63.3	34.5	46.1	47.9667	14.4905
936500	68.5	43.1	60.6	57.4	12.9988
937000	93.5	65.4	83.3	80.7333	14.2247
937500	80	42.7	60.2	60.9667	18.6618
938000	71.9	43.9	57.8	57.8667	14.0001
938500	64.1	49.8	56.2	56.7	7.1631
939000	80	45.9	62.5	62.8	17.052
939500	75.8	55.2	74.1	68.3667	11.4343
940000	82	54.6	69.4	68.6667	13.7147
940500	82	58.8	74.6	71.8	11.8507
941000	80.6	44.4	67.6	64.2	18.3379
941500	76.9	49.5	66.2	64.2	13.8091
942000	82	42	72.5	65.5	20.8986
942500	85.5	62.1	77.5	75.0333	11.8934
943000	76.3	41	62.5	59.9333	17.7894
943500	74.6	42.9	57.8	58.4333	15.8595
944000	66.2	40	53.8	53.3333	13.1062
944500	73.5	49.8	67.6	63.6333	12.3379
945000	100	54.6	84	79.5333	23.0272
945500	73.5	46.5	64.1	61.3667	13.706
946000	82.6	48.1	69.4	66.7	17.4078
946500	80.6	53.5	63.3	65.8	13.7219
947000	69.4	50.8	62.5	60.9	9.40266
947500	87.7	59.2	76.3	74.4	14.3447
948000	70.9	43.3	61	58.4	13.9825
948500	68	40.8	60.6	56.4667	14.0632
949000	91.7	58.8	77.5	76	16.5012
949500	73.5	48.3	65.8	62.5333	12.9137
950000	79.4	49.3	69.4	66.0333	15.3298
950500	64.1	37	53.8	51.6333	13.6793
951000	86.2	61	74.6	73.9333	12.6132
951500	73.5	38.6	60.6	57.5667	17.6466
952000	82	48.3	66.7	65.6667	16.8737
952500	77.5	49	60.2	62.2333	14.3584
953000	82.6	43.9	73	66.5	20.1522
953500	80	53.8	69.9	67.9	13.214
954000	73	44.4	64.9	60.7667	14.7412
954500	75.2	47.6	64.9	62.5667	13.9472
955000	87.7	55.6	71.4	71.5667	16.0506
955500	78.1	52.6	64.1	64.9333	12.7704
956000	87.7	58.8	74.6	73.7	14.471
956500	71.4	43.5	59.9	58.2667	14.0215
957000	82.6	49.5	70.9	67.6667	16.7852
957500	73.5	44.4	65.4	61.1	15.019
958000	80.6	40.2	56.8	59.2	20.3066
958500	87.7	35.3	68	63.6667	26.4674
959000	73.5	39.7	64.1	59.1	17.4459
959500	74.6	44.1	60.6	59.7667	15.2671
960000	84	58.5	78.1	73.5333	13.3493
960500	61.3	47.6	53.5	54.1333	6.87192
961000	91.7	52.9	70.9	71.8333	19.4168
961500	70.4	43.1	64.5	59.3333	14.3647
962000	68	51.5	61	60.1667	8.28151
962500	73	42.9	63.3	59.7333	15.3637
963000	84.7	48.3	70.9	67.9667	18.3764
963500	71.4	42.4	59.9	57.9	14.6031
964000	84	45.7	68.5	66.0667	19.2656
964500	81.3	35.6	71.9	62.9333	24.1334
965000	64.9	38.6	58.8	54.1	13.7655
965500	97.1	47.8	81.3	75.4	25.174
966000	87.7	61	78.1	75.6	13.5244
966500	63.3	29.5	57.1	49.9667	17.9937
967000	84	61	78.1	74.3667	11.9459
967500	74.1	41.8	65.8	60.5667	16.7739
968000	79.4	32.2	55.9	55.8333	23.6001
968500	62.5	39.4	54.9	52.2667	11.773
969000	75.2	55.6	69.9	66.9	10.1385
969500	84.7	60.6	72.5	72.6	12.0503
970000	86.2	53.2	76.9	72.1	17.0156
970500	68	40.8	60.2	56.3333	14.0062
971000	83.3	55.9	71.4	70.2	13.7394
971500	78.7	51.3	69	66.3333	13.8933
972000	69.4	35.8	60.6	55.2667	17.4234
972500	64.5	38.6	56.8	53.3	13.3
973000	80	46.7	64.1	63.6	16.6556
973500	75.8	49.5	62.5	62.6	13.1503
974000	71.9	41.3	57.1	56.7667	15.3027
974500	67.1	42.4	57.5	55.6667	12.4516
975000	83.3	55.6	75.8	71.5667	14.327
975500	71.9	45.9	64.1	60.6333	13.3422
976000	88.5	52.4	70.4	70.4333	18.05
976500	93.5	56.2	70.4	73.3667	18.8261
977000	69	46.5	63.7	59.7333	11.7628
977500	67.6	44.4	55.9	55.9667	11.6001
978000	78.7	45.2	61	61.6333	16.759
978500	82	48.8	66.7	65.8333	16.617
979000	80.6	43.5	63.3	62.4667	18.564
979500	80	43.9	57.8	60.5667	18.2083
980000	74.1	43.1	57.1	58.1	15.5242
980500	83.3	49.3	65.4	66	17.0079
981000	98	60.2	80	79.4	18.9071
981500	73.5	42.4	63.7	59.8667	15.9004
982000	70.4	29.5	54.9	51.6	20.6487
982500	64.1	36.8	54.3	51.7333	13.8298
983000	75.8	46.9	62.5	61.7333	14.4652
983500	74.6	38.3	53.8	55.5667	18.2144
984000	84.7	59.2	75.8	73.2333	12.9423
984500	73	35.5	51.3	53.2667	18.8272
985000	76.9	55.2	64.5	65.5333	10.8868
985500	83.3	47.2	63.3	64.6	18.0851
986000	69.4	50	55.9	58.4333	9.94502
986500	80.6	54.9	66.7	67.4	12.8643
987000	73.5	51.5	67.6	64.2	11.3873
987500	87	69.9	75.8	77.5667	8.68581
988000	82	56.5	70.4	69.6333	12.7673
988500	72.5	40.7	56.8	56.6667	15.9004
989000	78.7	49.5	64.1	64.1	14.6
989500	80	45	70.4	65.1333	18.0846
990000	74.1	40.8	62.1	59	16.8651
990500	78.1	57.8	72.5	69.4667	10.4844
991000	75.8	53.2	65.8	64.9333	11.3249
991500	79.4	45.9	67.6	64.3	16.9921
992000	89.3	59.5	77.5	75.4333	15.0071
992500	69.9	51.3	64.5	61.9	9.5687
993000	78.7	57.1	71.4	69.0667	10.9874
993500	82	58.1	75.8	71.9667	12.4026
994000	84.7	61.3	78.7	74.9	12.154
994500	90.1	63.7	82	78.6	13.5244
995000	67.1	41.8	58.5	55.8	12.8643
995500	56.8	41	44.8	47.5333	8.24702
996000	96.2	76.3	90.1	87.5333	10.1953
996500	74.6	62.9	73	70.1667	6.34376
997000	69.9	44.1	64.1	59.3667	13.5356
997500	87	54.3	74.1	71.8	16.4709
998000	82.6	64.9	76.9	74.8	9.03493
998500	71.9	49.3	64.5	61.9	11.5222
999000	83.3	55.9	73.5	70.9	13.8838
999500	74.1	46.9	66.7	62.5667	14.0632
1000000	69.9	36.8	56.2	54.3	16.6316
1000500	76.9	46.3	74.1	65.7667	16.9167
1001000	78.1	63.3	69	70.1333	7.46481
1001500	59.9	36.6	50.3	48.9333	11.71
1002000	76.9	51.5	74.6	67.6667	14.0479
1002500	81.3	63.7	75.8	73.6	9.00389

## Sheet: Phenol-pb2B
	GC-SSR responses to furaneol Phenol
T[ms]	F[Hz]	F[Hz]	F[Hz]	Average	SD
150000	51.8	62.9	61	58.5667	5.93661
150500	57.5	70.9	65.4	64.6	6.73573
151000	55.9	59.9	54.1	56.6333	2.96873
151500	54.3	58.1	48.8	53.7333	4.67582
152000	61.7	69.9	59.9	63.8333	5.33042
152500	41.3	50	50	47.1	5.02295
153000	47.4	49.3	43.5	46.7333	2.95691
153500	49.8	63.7	59.9	57.8	7.18401
154000	62.9	66.7	62.9	64.1667	2.19393
154500	67.1	78.7	78.7	74.8333	6.69726
155000	60.6	66.2	60.6	62.4667	3.23316
155500	59.5	63.3	59.5	60.7667	2.19393
156000	55.6	63.7	56.8	58.7	4.3715
156500	54.1	61.7	55.2	57	4.10731
157000	65.4	70.4	66.7	67.5	2.59422
157500	51.5	63.3	59.5	58.1	6.02329
158000	62.5	69.9	68	66.8	3.84318
158500	54.6	62.5	60.6	59.2333	4.12351
159000	50.8	57.8	48.1	52.2333	5.00633
159500	48.5	62.1	62.1	57.5667	7.85196
160000	53.8	59.5	59.5	57.6	3.2909
160500	53.2	61	58.8	57.6667	4.02161
161000	46.9	50.8	48.8	48.8333	1.95021
161500	51	54.9	52.9	52.9333	1.95021
162000	41.5	45.5	43.5	43.5	2
162500	50.5	52.4	50.5	51.1333	1.09697
163000	46.3	50	48.1	48.1333	1.85023
163500	48.5	52.6	44.6	48.5667	4.00042
164000	37.6	38.8	33.4	36.6	2.83549
164500	42.4	47.8	42.4	44.2	3.11769
165000	49.8	55.6	51.5	52.3	2.98161
165500	48.1	51.8	50	49.9667	1.85023
166000	47.2	54.6	52.6	51.4667	3.82797
166500	48.3	52.1	45.5	48.6333	3.3126
167000	40.3	44.2	42.2	42.2333	1.95021
167500	46.1	46.1	36.9	43.0333	5.31162
168000	54.1	54.1	50.3	52.8333	2.19393
168500	49.5	59.5	53.5	54.1667	5.03322
169000	44.4	47.4	43.7	45.1667	1.96554
169500	45.7	53.5	47.6	48.9333	4.06735
170000	32.7	34.6	28.8	32.0333	2.95691
170500	47.2	56.2	52.6	52	4.5299
171000	45.9	49.8	42	45.9	3.9
171500	37.9	44.8	39.1	40.6	3.68646
172000	46.3	48.3	42.9	45.8333	2.73008
172500	39.4	45	43.3	42.5667	2.87112
173000	45	48.8	46.9	46.9	1.9
173500	36.6	45.5	40.2	40.7667	4.47698
174000	33.3	37.2	33.3	34.6	2.25167
174500	46.3	59.5	53.8	53.2	6.62042
175000	46.1	47.8	40.7	44.8667	3.7072
175500	57.8	59.5	55.9	57.7333	1.80093
176000	44.4	47.2	39.5	43.7	3.89744
176500	45.7	51.3	47.6	48.2	2.84781
177000	52.6	56.2	52.6	53.8	2.07846
177500	44.6	48.5	44.6	45.9	2.25167
178000	38.9	46.1	41.8	42.2667	3.62261
178500	33.2	38.5	36.8	36.1667	2.70617
179000	41	46.9	41	42.9667	3.40637
179500	40.8	46.7	44.6	44.0333	2.99054
180000	33	38.5	36.6	36.0333	2.79344
180500	34.6	40.3	34.6	36.5	3.2909
181000	45.2	51	43.3	46.5	4.01123
181500	36.2	38.2	38.2	37.5333	1.1547
182000	41	46.5	37.3	41.6	4.62925
182500	41.7	41.7	34.1	39.1667	4.38786
183000	42.7	44.4	41	42.7	1.7
183500	46.1	51.5	42.4	46.6667	4.57639
184000	41.2	54.9	50.5	48.8667	6.99452
184500	42.6	45.2	43.3	43.7	1.34536
185000	44.4	50	48.3	47.5667	2.87112
185500	46.1	54.3	50.3	50.2333	4.10041
186000	46.9	52.6	46.7	48.7333	3.35012
186500	39.2	41.2	37.3	39.2333	1.95021
187000	48.1	53.8	50	50.6333	2.9023
187500	38.6	44.1	38.6	40.4333	3.17543
188000	41.3	43.3	37.6	40.7333	2.89194
188500	50	57.8	55.9	54.5667	4.06735
189000	41.3	45	41.3	42.5333	2.1362
189500	43.3	48.8	43.1	45.0667	3.23471
190000	43.7	49.5	45.7	46.3	2.94618
190500	37.7	39.8	36	37.8333	1.90351
191000	47.4	51	49.3	49.2333	1.80093
191500	49.8	55.9	48.1	51.2667	4.10163
192000	46.9	54.3	54.3	51.8333	4.27239
192500	40.7	42.6	40.7	41.3333	1.09697
193000	46.9	50.8	50.8	49.5	2.25167
193500	43.9	55.2	51.5	50.2	5.76108
194000	54.9	58.8	55.2	56.3	2.17025
194500	42.6	52.4	48.3	47.7667	4.92172
195000	42	49.8	49.8	47.2	4.50333
195500	49	53.2	49	50.4	2.42487
196000	49.5	51.3	47.8	49.5333	1.75024
196500	44.6	48.5	46.7	46.6	1.95192
197000	47.8	53.5	47.8	49.7	3.2909
197500	44.2	50	48.1	47.4333	2.95691
198000	52.6	60.2	56.5	56.4333	3.80044
198500	45.9	54.9	51.3	50.7	4.5299
199000	42.2	45.2	45.2	44.2	1.73205
199500	40.3	46.1	40.3	42.2333	3.34863
200000	50.3	53.8	44.4	49.5	4.75079
200500	47.8	51.8	47.6	49.0667	2.36925
201000	51.5	55.2	49.8	52.1667	2.76104
201500	48.1	50	50	49.3667	1.09697
202000	35.2	40.8	38.9	38.3	2.84781
202500	44.6	48.5	42.7	45.2667	2.95691
203000	39.2	43.1	43.1	41.8	2.25167
203500	39.1	48.3	46.5	44.6333	4.87579
204000	45.5	47.4	43.3	45.4	2.05183
204500	50.8	56.2	56.2	54.4	3.11769
205000	44.1	46.1	44.1	44.7667	1.1547
205500	45	52.4	48.8	48.7333	3.70045
206000	41	44.8	42.9	42.9	1.9
206500	55.2	57.1	55.2	55.8333	1.09697
207000	47.6	47.6	46.9	47.3667	0.404145
207500	49.5	61	57.1	55.8667	5.84836
208000	44.4	52.1	50.3	48.9333	4.02782
208500	40.3	46.1	40.3	42.2333	3.34863
209000	50.3	53.8	44.4	49.5	4.75079
209500	47.8	51.8	47.6	49.0667	2.36925
210000	51.5	55.2	49.8	52.1667	2.76104
210500	48.1	50	50	49.3667	1.09697
211000	35.2	40.8	38.9	38.3	2.84781
211500	44.6	48.5	42.7	45.2667	2.95691
212000	39.2	43.1	43.1	41.8	2.25167
212500	39.1	48.3	46.5	44.6333	4.87579
213000	45.5	47.4	43.3	45.4	2.05183
213500	50.8	56.2	56.2	54.4	3.11769
214000	44.1	46.1	44.1	44.7667	1.1547
214500	53.8	57.5	55.6	55.6333	1.85023
215000	43.5	45.5	43.5	44.1667	1.1547
215500	52.1	59.2	57.1	56.1333	3.64737
216000	51	56.5	52.9	53.4667	2.79344
216500	51.5	55.2	53.5	53.4	1.85203
217000	54.1	65.8	65.8	61.9	6.755
217500	45.2	51.3	51.3	49.2667	3.52184
218000	40.3	44.1	42.2	42.2	1.9
218500	41.8	45.7	45.7	44.4	2.25167
219000	45.9	51.8	49.8	49.1667	3.00056
219500	31.5	31.5	31.5	31.5	0
220000	43.7	52.1	52.1	49.3	4.84974
220500	45.7	47.6	47.6	46.9667	1.09697
221000	32.7	38.5	34.6	35.2667	2.95691
221500	34.2	34.2	32.5	33.6333	0.981495
222000	35.8	37.6	37.6	37	1.03923
222500	35.8	38	37	36.9333	1.10151
223000	40.2	45.9	40.2	42.1	3.2909
223500	30.5	32.4	28.6	30.5	1.9
224000	29.3	29.3	27.5	28.7	1.03923
224500	47.2	49	47.2	47.8	1.03923
225000	42.9	45	41.3	43.0667	1.85562
225500	36.9	40.8	38.9	38.8667	1.95021
226000	47.8	47.8	42.2	45.9333	3.23316
226500	36.4	38.3	38.3	37.6667	1.09697
227000	35.2	43.1	41	39.7667	4.09186
227500	35.5	37.3	33.7	35.5	1.8
228000	41	49	45	45	4
228500	36.9	43.3	39.4	39.8667	3.22542
229000	42.7	46.5	42.7	43.9667	2.19393
229500	42.2	44.1	39.4	41.9	2.36432
230000	52.6	54.6	51	52.7333	1.8037
230500	36.8	44.6	40.7	40.7	3.9
231000	37.9	37.9	36	37.2667	1.09697
231500	43.3	45.2	41.3	43.2667	1.95021
232000	35.6	35.6	35.6	35.6	0
232500	34.6	36.5	34.6	35.2333	1.09697
233000	43.9	47.8	45.9	45.8667	1.95021
233500	54.6	56.8	54.6	55.3333	1.27017
234000	50.5	53.8	53.8	52.7	1.90526
234500	45.9	51.5	49.8	49.0667	2.87112
235000	47.8	53.5	49.8	50.3667	2.89194
235500	45.9	53.5	49.5	49.6333	3.80175
236000	31.2	45.9	42.2	39.7667	7.64613
236500	38.2	41.8	39.8	39.9333	1.8037
237000	31.8	37.7	37.7	35.7333	3.40637
237500	40.2	47.4	40.2	42.6	4.15692
238000	46.5	54.3	54.3	51.7	4.50333
238500	42.2	45.9	42.2	43.4333	2.1362
239000	50.3	52.1	50.3	50.9	1.03923
239500	43.1	45	41.2	43.1	1.9
240000	49	49	43.1	47.0333	3.40637
240500	55.9	61.7	59.5	59.0333	2.92803
241000	50	53.8	51.8	51.8667	1.90088
241500	39.7	47.6	47.6	44.9667	4.56107
242000	54.6	56.5	51	54.0333	2.79344
242500	52.4	54.1	50.3	52.2667	1.90351
243000	46.5	46.5	42.6	45.2	2.25167
243500	47.8	55.2	49.8	50.9333	3.82797
244000	45.7	47.6	43.7	45.6667	1.95021
244500	47.4	47.4	41.5	45.4333	3.40637
245000	52.1	59.9	58.1	56.7	4.08412
245500	40	42	38.2	40.0667	1.90088
246000	45.5	47.4	41.5	44.8	3.01164
246500	45.2	51.5	49.5	48.7333	3.21921
247000	45.2	47.2	43.5	45.3	1.85203
247500	37.9	41.8	39.8	39.8333	1.95021
248000	47.6	49.5	43.9	47	2.84781
248500	42.6	44.4	40.7	42.5667	1.85023
249000	50.3	50.3	46.3	48.9667	2.3094
249500	42.2	46.1	46.1	44.8	2.25167
250000	38.3	45.7	41.8	41.9333	3.7018
250500	45.7	47.6	47.6	46.9667	1.09697
251000	46.7	56.5	48.5	50.5667	5.21664
251500	46.1	51.8	49	48.9667	2.85015
252000	40	43.9	40	41.3	2.25167
252500	44.8	44.8	39.8	43.1333	2.88675
253000	42	50.8	49	47.2667	4.64901
253500	41.3	48.8	48.8	46.3	4.33013
254000	38.8	40.7	37.3	38.9333	1.70392
254500	48.5	56.5	50.5	51.8333	4.16333
255000	50.3	59.5	55.9	55.2333	4.63609
255500	47.6	59.2	59.2	55.3333	6.69726
256000	42.7	50.3	48.3	47.1	3.93954
256500	42.6	46.1	44.1	44.2667	1.75594
257000	47.6	53.5	49.5	50.2	3.01164
257500	48.1	52.6	49	49.9	2.38118
258000	47.2	51	43.5	47.2333	3.75011
258500	52.6	56.5	50.8	53.3	2.91376
259000	48.3	58.1	56.2	54.2	5.19711
259500	43.5	50.5	47.8	47.2667	3.53034
260000	45.2	50.8	47.2	47.7333	2.83784
260500	53.8	59.9	59.9	57.8667	3.52184
261000	54.1	61	59.2	58.1	3.57911
261500	52.6	58.5	58.5	56.5333	3.40637
262000	52.9	60.6	60.6	58.0333	4.4456
262500	52.9	62.5	60.6	58.6667	5.08363
263000	50.3	53.8	50.3	51.4667	2.02073
263500	38.8	40.7	36.8	38.7667	1.95021
264000	50.3	58.1	58.1	55.5	4.50333
264500	54.9	72.5	72.5	66.6333	10.1614
265000	49.8	57.1	57.1	54.6667	4.21466
265500	39.1	45	45	43.0333	3.40637
266000	47.8	51.8	47.8	49.1333	2.3094
266500	55.9	55.9	55.9	55.9	0
267000	49.5	55.2	52.9	52.5333	2.86764
267500	41	44.8	37.9	41.2333	3.45591
268000	49.3	58.8	58.8	55.6333	5.48483
268500	59.2	61.3	59.2	59.9	1.21244
269000	41.2	43.1	41.2	41.8333	1.09697
269500	46.5	56.2	51.3	51.3333	4.85009
270000	50.5	52.6	50.5	51.2	1.21244
270500	48.1	52.1	52.1	50.7667	2.3094
271000	45	49	49	47.6667	2.3094
271500	50.5	62.1	62.1	58.2333	6.69726
272000	49.8	51.8	49.8	50.4667	1.1547
272500	42	51.5	51.5	48.3333	5.48483
273000	42.7	42.7	41.5	42.3	0.69282
273500	42.9	48.5	46.5	45.9667	2.83784
274000	40.7	49.8	49.8	46.7667	5.25389
274500	46.5	48.5	48.5	47.8333	1.1547
275000	45.9	51.5	51.5	49.6333	3.23316
275500	48.1	50	50	49.3667	1.09697
276000	42.7	46.3	46.3	45.1	2.07846
276500	50.5	54.3	52.4	52.4	1.9
277000	36.8	42.7	40.7	40.0667	3.00056
277500	39.4	41.2	40.8	40.4667	0.945163
278000	33.1	36.9	35	35	1.9
278500	39.1	43.1	41	41.0667	2.00083
279000	40.5	42.4	42.4	41.7667	1.09697
279500	44.6	52.4	50.5	49.1667	4.06735
280000	34.6	38.9	38.9	37.4667	2.48261
280500	30.5	35.7	35.7	33.9667	3.00222
281000	36	40.5	32.8	36.4333	3.86825
281500	35	40.2	38.5	37.9	2.65141
282000	46.3	46.3	44.4	45.6667	1.09697
282500	42	44.2	44.2	43.4667	1.27017
283000	32.7	36.5	36.5	35.2333	2.19393
283500	43.5	46.9	43.5	44.6333	1.96299
284000	45.2	45.2	45.2	45.2	8.70234e-15
284500	42.2	42.2	42.2	42.2	0
285000	38.6	44.4	42.4	41.8	2.94618
285500	46.5	46.5	44.4	45.8	1.21244
286000	49.3	53.2	51.3	51.2667	1.95021
286500	46.3	57.5	53.8	52.5333	5.70643
287000	42.2	46.1	46.1	44.8	2.25167
287500	39.8	49.3	47.4	45.5	5.02693
288000	46.7	51.5	49.5	49.2333	2.41109
288500	44.6	46.5	41.3	44.1333	2.63122
289000	47.2	50.8	46.7	48.2333	2.23681
289500	43.5	53.5	53.5	50.1667	5.7735
290000	45.7	45.7	45.7	45.7	8.70234e-15
290500	45.2	54.9	54.9	51.6667	5.6003
291000	35.6	48.1	48.1	43.9333	7.21688
291500	41.5	47.2	45.2	44.6333	2.89194
292000	50	57.5	57.5	55	4.33013
292500	55.2	59.2	57.1	57.1667	2.00083
293000	51.5	58.8	56.8	55.7	3.77227
293500	53.2	54.9	54.9	54.3333	0.981495
294000	37.7	39.5	35.8	37.6667	1.85023
294500	53.5	53.5	50.5	52.5	1.73205
295000	34.2	38.2	36.2	36.2	2
295500	55.9	61.7	57.8	58.4667	2.95691
296000	41.8	49.3	49.3	46.8	4.33013
296500	38.8	44.6	44.6	42.6667	3.34863
297000	58.1	62.1	60.2	60.1333	2.00083
297500	46.5	50.3	50.3	49.0333	2.19393
298000	54.6	58.5	50.8	54.6333	3.85011
298500	45.7	51.3	51.3	49.4333	3.23316
299000	44.6	46.5	46.5	45.8667	1.09697
299500	37.7	41.5	41.5	40.2333	2.19393
300000	57.5	61.3	61.3	60.0333	2.19393
300500	51.8	57.8	55.9	55.1667	3.06649
301000	52.1	59.9	59.9	57.3	4.50333
301500	45.2	47.8	47.8	46.9333	1.50111
302000	56.8	60.6	60.6	59.3333	2.19393
302500	48.8	50.8	48.8	49.4667	1.1547
303000	50.8	54.6	54.6	53.3333	2.19393
303500	51	54.9	54.9	53.6	2.25167
304000	49.8	51.8	51.8	51.1333	1.1547
304500	38	41.8	39.8	39.8667	1.90088
305000	49.5	57.8	57.8	55.0333	4.79201
305500	44.6	58.1	56.5	53.0667	7.37586
306000	51	55.9	54.1	53.6667	2.47857
306500	58.8	64.5	64.5	62.6	3.2909
307000	45.5	56.5	54.6	52.2	5.87963
307500	41.3	45	43.1	43.1333	1.85023
308000	40.7	50.5	48.5	46.5667	5.17816
308500	50	60.2	56.5	55.5667	5.16366
309000	54.6	56.5	56.5	55.8667	1.09697
309500	51.3	54.9	53.2	53.1333	1.80093
310000	64.1	65.8	65.8	65.2333	0.981495
310500	51.8	59.2	59.2	56.7333	4.27239
311000	51.5	53.5	51.5	52.1667	1.1547
311500	51.8	57.1	55.2	54.7	2.68514
312000	49	52.6	52.6	51.4	2.07846
312500	54.1	59.9	57.8	57.2667	2.93655
313000	50	53.5	50	51.1667	2.02073
313500	45.7	55.6	53.8	51.7	5.27352
314000	56.8	58.8	56.8	57.4667	1.1547
314500	47.8	53.8	49.8	50.4667	3.05505
315000	47.8	58.8	58.8	55.1333	6.35085
315500	37.9	50.5	50.5	46.3	7.27461
316000	50	63.3	61.3	58.2	7.17147
316500	50.8	60.6	60.6	57.3333	5.65803
317000	46.1	50	50	48.7	2.25167
317500	55.2	61	59.2	58.4667	2.96873
318000	48.1	50	48.1	48.7333	1.09697
318500	44.4	56.2	56.2	52.2667	6.81273
319000	44.8	50.8	50.8	48.8	3.4641
319500	44.6	55.2	55.2	51.6667	6.11991
320000	55.9	65.4	63.7	61.6667	5.0659
320500	45.9	54.1	54.1	51.3667	4.73427
321000	42.6	50.3	50.3	47.7333	4.4456
321500	45.7	51.3	51.3	49.4333	3.23316
322000	41	50.3	50.3	47.2	5.36936
322500	46.1	50.5	50.5	49.0333	2.54034
323000	39.7	47.2	45.2	44.0333	3.88373
323500	39.4	55.2	55.2	49.9333	9.12213
324000	44.4	46.3	46.3	45.6667	1.09697
324500	42.7	50	50	47.5667	4.21466
325000	53.2	57.1	57.1	55.8	2.25167
325500	51.3	53.2	51.3	51.9333	1.09697
326000	45.5	55.2	53.5	51.4	5.17977
326500	42	51.5	51.5	48.3333	5.48483
327000	41.5	47.2	47.2	45.3	3.2909
327500	37.9	43.7	41.7	41.1	2.94618
328000	39.2	44.4	42.4	42	2.62298
328500	42	47.8	44.1	44.6333	2.93655
329000	37.9	48.3	46.3	44.1667	5.51845
329500	39.1	45.7	41.8	42.2	3.31813
330000	40.8	48.5	46.5	45.2667	3.99541
330500	45.9	46.5	46.5	46.3	0.34641
331000	38.6	40.7	38.6	39.3	1.21244
331500	34.8	40.7	36.8	37.4333	3.00056
332000	47.6	53.5	53.5	51.5333	3.40637
332500	41.2	44.4	44.4	43.3333	1.84752
333000	41	46.5	46.5	44.6667	3.17543
333500	40	42	40	40.6667	1.1547
334000	44.4	52.4	52.4	49.7333	4.6188
334500	40.3	50.5	50.5	47.1	5.88897
335000	40	51	51	47.3333	6.35085
335500	46.7	46.7	44.8	46.0667	1.09697
336000	45	56.2	56.2	52.4667	6.46632
336500	34.2	39.4	39.4	37.6667	3.00222
337000	38.6	42.4	42.4	41.1333	2.19393
337500	34.4	36.4	36.4	35.7333	1.1547
338000	51.5	57.5	55.6	54.8667	3.06649
338500	45	50.8	50.8	48.8667	3.34863
339000	43.7	47.4	47.4	46.1667	2.1362
339500	45	52.9	52.9	50.2667	4.56107
340000	38	47.4	43.7	43.0333	4.73533
340500	45.7	55.6	55.6	52.3	5.71577
341000	47.2	51.8	51.8	50.2667	2.65581
341500	38.3	48.1	42.2	42.8667	4.9339
342000	45	48.8	48.8	47.5333	2.19393
342500	51.3	61.7	61.7	58.2333	6.00444
343000	43.5	51	49	47.8333	3.88373
343500	31.9	42.6	40.7	38.4	5.70877
344000	42.6	51.5	49.5	47.8667	4.6694
344500	44.6	52.4	52.4	49.8	4.50333
345000	47.6	57.1	53.2	52.6333	4.77528
345500	42.9	54.6	54.6	50.7	6.755
346000	51.8	52.4	52.4	52.2	0.34641
346500	46.1	46.1	46.1	46.1	0
347000	41.7	50	46.1	45.9333	4.15251
347500	31.1	39.4	39.4	36.6333	4.79201
348000	37.7	47.2	45.2	43.3667	5.00833
348500	49.3	67.1	67.1	61.1667	10.2768
349000	94.3	104.2	100	99.5	4.9689
349500	126.6	129.9	128.2	128.233	1.65025
350000	122	128.2	123.5	124.567	3.23471
350500	113.6	116.3	116.3	115.4	1.55885
351000	103.1	106.4	101	103.5	2.72213
351500	97.1	101	101	99.7	2.25167
352000	86.2	93.5	93.5	91.0667	4.21466
352500	88.5	92.6	92.6	91.2333	2.36714
353000	91.7	95.2	95.2	94.0333	2.02073
353500	82.6	94.3	92.6	89.8333	6.32166
354000	76.9	89.3	89.3	85.1667	7.15914
354500	82.6	88.5	88.5	86.5333	3.40637
355000	75.8	82	82	79.9333	3.57957
355500	76.3	86.2	82	81.5	4.9689
356000	77.5	87.7	82.6	82.6	5.1
356500	85.5	89.3	87	87.2667	1.91398
357000	65.8	82	82	76.6	9.35307
357500	70.4	78.1	78.1	75.5333	4.4456
358000	75.2	84.7	84.7	81.5333	5.48483
358500	68	75.8	75.8	73.2	4.50333
359000	61.7	77.5	75.8	71.6667	8.67314
359500	70.4	82	76.3	76.2333	5.80029
360000	61.3	74.6	74.6	70.1667	7.67876
360500	69	82.6	82.6	78.0667	7.85196
361000	57.8	71.4	69.4	66.2	7.34302
361500	64.9	76.9	76.9	72.9	6.9282
362000	54.1	81.3	81.3	72.2333	15.7039
362500	61.3	76.9	76.9	71.7	9.00666
363000	57.1	78.1	76.3	70.5	11.6396
363500	48.8	70.4	70.4	63.2	12.4708
364000	50.8	69.4	69.4	63.2	10.7387
364500	43.3	72.5	68.5	61.4333	15.8308
365000	41.8	76.3	76.3	64.8	19.9186
365500	45	73.5	71.9	63.4667	16.0126
366000	50.8	75.8	75.8	67.4667	14.4338
366500	49.5	74.1	70.4	64.6667	13.2644
367000	51.3	74.1	70.4	65.2667	12.2361
367500	44.6	76.9	76.9	66.1333	18.6484
368000	44.6	69	69	60.8667	14.0873
368500	39.5	68	68	58.5	16.4545
369000	35	67.1	67.1	56.4	18.5329
369500	28.9	67.1	65.4	53.8	21.5808
370000	35.5	64.9	63.3	54.5667	16.5316
370500	39.4	67.6	65.8	57.6	15.7873
371000	32.9	65.8	64.1	54.2667	18.5236
371500	35.6	69.9	69.9	58.4667	19.8031
372000	35.8	67.1	65.4	56.1	17.6009
372500	34.6	71.4	71.4	59.1333	21.2465
373000	48.1	79.4	79.4	68.9667	18.0711
373500	35.7	77.5	77.5	63.5667	24.1332
374000	29.9	65.4	65.4	53.5667	20.4959
374500	28.1	54.1	50.3	44.1667	14.0433
375000	32.9	61	61	51.6333	16.2235
375500	27.2	62.1	58.1	49.1333	19.0998
376000	31.3	69.9	66.2	55.8	21.2981
376500	30.7	70.9	70.9	57.5	23.2095
377000	37.3	63.7	63.7	54.9	15.242
377500	32.6	70.9	70.9	58.1333	22.1125
378000	36.6	66.7	64.5	55.9333	16.7793
378500	34.1	71.9	68	58	20.7897
379000	25.1	59.9	59.9	48.3	20.0918
379500	30.8	60.2	56.5	49.1667	16.0132
380000	28	74.1	74.1	58.7333	26.6158
380500	47.2	76.9	76.9	67	17.1473
381000	42.7	73	70.9	62.2	16.9201
381500	26.3	64.1	64.1	51.5	21.8238
382000	26.4	58.5	56.5	47.1333	17.9834
382500	30.5	61.3	61.3	51.0333	17.7824
383000	25.5	58.1	56.5	46.7	18.3772
383500	25.9	67.1	65.4	52.8	23.3116
384000	21	50	47.8	39.6	16.1456
384500	28.8	64.9	62.9	52.2	20.2897
385000	19.7	59.9	59.9	46.5	23.2095
385500	21.6	61.3	61.3	48.0667	22.9208
386000	41.5	67.6	67.6	58.9	15.0688
386500	32.3	62.9	61	52.0667	17.1448
387000	27.9	71.4	69.4	56.2333	24.5578
387500	25.1	61	58.8	48.3	20.1219
388000	29	55.9	55.9	46.9333	15.5307
388500	28.7	63.7	61.7	51.3667	19.6554
389000	37.2	62.1	62.1	53.8	14.376
389500	31.6	60.2	60.2	50.6667	16.5122
390000	33.8	63.7	63.7	53.7333	17.2628
390500	36.8	59.9	59.9	52.2	13.3368
391000	37	57.5	57.5	50.6667	11.8357
391500	34.4	58.1	58.1	50.2	13.6832
392000	32.1	61.7	59.9	51.2333	16.5944
392500	34.4	63.3	63.3	53.6667	16.6854
393000	27	59.9	59.9	48.9333	18.9948
393500	21.4	58.5	56.5	45.4667	20.8663
394000	24.6	51.5	51.5	42.5333	15.5307
394500	30.7	69	69	56.2333	22.1125
395000	31.4	65.4	65.4	54.0667	19.6299
395500	25.3	46.7	46.7	39.5667	12.3553
396000	32.5	59.5	59.5	50.5	15.5885
396500	25.6	58.5	58.5	47.5333	18.9948
397000	32.9	58.1	58.1	49.7	14.5492
397500	22.7	52.1	49.8	41.5333	16.3506
398000	21.4	54.9	52.9	43.0667	18.7905
398500	26.9	55.6	55.6	46.0333	16.57
399000	25.7	58.1	58.1	47.3	18.7061
399500	20.9	48.5	48.5	39.3	15.9349
400000	28.2	53.2	53.2	44.8667	14.4338
400500	23.5	57.5	57.5	46.1667	19.6299
401000	39.5	55.2	55.2	49.9667	9.0644
401500	35.8	64.1	64.1	54.6667	16.339
402000	33.1	64.9	64.9	54.3	18.3597
402500	18.7	59.5	59.5	45.9	23.5559
403000	40.3	62.1	58.5	53.6333	11.6865
403500	36.5	60.2	60.2	52.3	13.6832
404000	23	55.9	55.9	44.9333	18.9948
404500	37.5	61	57.1	51.8667	12.5938
405000	27.8	54.3	54.3	45.4667	15.2998
405500	23.8	47.2	45.2	38.7333	12.9713
406000	29.1	49.3	49.3	42.5667	11.6625
406500	37.7	63.3	63.3	54.7667	14.7802
407000	21.3	48.8	48.8	39.6333	15.8771
407500	31.4	57.5	57.5	48.8	15.0688
408000	31.7	58.8	57.1	49.2	15.1793
408500	27.1	52.6	52.6	44.1	14.7224
409000	26.7	49.8	48.5	41.6667	12.9778
409500	30.1	52.9	51	44.6667	12.6508
410000	21.2	55.6	55.6	44.1333	19.8608
410500	22.8	54.6	52.9	43.4333	17.8892
411000	14.7	42.6	42.6	33.3	16.1081
411500	26.7	40.5	40.5	35.9	7.96743
412000	25.5	54.9	51	43.8	15.9678
412500	42.2	62.5	62.5	55.7333	11.7202
413000	30.7	51.8	51.8	44.7667	12.1821
413500	33.4	61.3	61.3	52	16.1081
414000	35.1	52.6	52.6	46.7667	10.1036
414500	29.8	52.6	50.8	44.4	12.676
415000	29.7	55.6	53.5	46.2667	14.3855
415500	26.3	54.3	54.3	44.9667	16.1658
416000	17.3	47.4	47.4	37.3667	17.3782
416500	18.1	48.3	48.3	38.2333	17.436
417000	26.9	61.7	61.7	50.1	20.0918
417500	18.8	54.6	54.6	42.6667	20.6691
418000	33.8	64.5	64.5	54.2667	17.7247
418500	31.5	59.2	59.2	49.9667	15.9926
419000	25.1	63.3	63.3	50.5667	22.0548
419500	32.2	51.8	49.8	44.6	10.7852
420000	38.2	59.5	59.5	52.4	12.2976
420500	25.3	62.9	62.9	50.3667	21.7084
421000	23.1	58.1	58.1	46.4333	20.2073
421500	22.2	44.4	42.6	36.4	12.3305
422000	41	64.1	64.1	56.4	13.3368
422500	28.5	58.5	58.5	48.5	17.3205
423000	27.2	57.1	55.2	46.5	16.7413
423500	35.5	65.4	62.9	54.6	16.5882
424000	30.2	54.9	54.9	46.6667	14.2606
424500	22	48.1	46.1	38.7333	14.526
425000	36.9	60.2	60.2	52.4333	13.4523
425500	33.4	55.2	53.2	47.2667	12.0504
426000	29.6	53.2	53.2	45.3333	13.6255
426500	31	54.3	54.3	46.5333	13.4523
427000	31.7	57.8	55.6	48.3667	14.4756
427500	25.1	46.9	46.9	39.6333	12.5862
428000	31.1	54.3	54.3	46.5667	13.3945
428500	32.7	57.5	57.5	49.2333	14.3183
429000	27.2	55.2	55.2	45.8667	16.1658
429500	30	52.6	52.6	45.0667	13.0481
430000	29.1	51	51	43.7	12.644
430500	42.6	68	68	59.5333	14.6647
431000	33.6	61.3	61.3	52.0667	15.9926
431500	29.8	53.8	50	44.5333	12.9001
432000	14.5	50	50	38.1667	20.4959
432500	33	56.5	54.3	47.9333	12.9793
433000	26	47.8	47.8	40.5333	12.5862
433500	25.6	58.8	58.8	47.7333	19.168
434000	29.9	57.8	57.8	48.5	16.1081
434500	28.3	53.5	53.5	45.1	14.5492
435000	27.6	57.5	57.5	47.5333	17.2628
435500	20.4	53.5	53.5	42.4667	19.1103
436000	30.4	53.5	53.5	45.8	13.3368
436500	31.9	52.1	50.3	44.7667	11.1791
437000	22.8	43.7	43.7	36.7333	12.0666
437500	29.8	49.5	45.7	41.6667	10.451
438000	31.2	55.6	55.6	47.4667	14.0873
438500	20.8	50	50	40.2667	16.8586
439000	16.1	52.9	52.9	40.6333	21.2465
439500	17.4	44.8	42.9	35.0333	15.3004
440000	31.7	58.1	58.1	49.3	15.242
440500	17.8	58.1	58.1	44.6667	23.2672
441000	26.5	59.2	59.2	48.3	18.8794
441500	46.1	65.8	65.8	59.2333	11.3738
442000	34.6	55.9	52.1	47.5333	11.3606
442500	27.9	58.1	58.1	48.0333	17.436
443000	39.4	60.6	60.6	53.5333	12.2398
443500	40.8	58.1	58.1	52.3333	9.98816
444000	38	62.9	62.9	54.6	14.376
444500	32.6	51	49	44.2	10.0955
445000	36.9	64.1	64.1	55.0333	15.7039
445500	38.9	57.1	57.1	51.0333	10.5078
446000	33	52.4	52.4	45.9333	11.2006
446500	32.3	49.3	45.5	42.3667	8.92263
447000	22.5	50	50	40.8333	15.8771
447500	36.5	53.8	53.8	48.0333	9.98816
448000	35.5	53.2	51.3	46.6667	9.71717
448500	49	70.4	70.4	63.2667	12.3553
449000	24.9	55.2	55.2	45.1	17.4937
449500	35.6	50.5	50.5	45.5333	8.60252
450000	34	55.2	53.2	47.4667	11.7053
450500	25.8	53.5	50	43.1	15.0841
451000	37.9	51.3	49.5	46.2333	7.27278
451500	39.2	64.5	64.5	56.0667	14.607
452000	27.4	54.9	54.9	45.7333	15.8771
452500	27.7	61.3	57.5	48.8333	18.4004
453000	24.2	50.3	50.3	41.6	15.0688
453500	23.3	55.2	53.5	44	17.9469
454000	35.3	62.1	62.1	53.1667	15.473
454500	33.2	59.5	59.5	50.7333	15.1843
455000	27.8	49.5	49.5	42.2667	12.5285
455500	34.4	50.5	50.5	45.1333	9.29534
456000	29.9	56.8	52.9	46.5333	14.5363
456500	27.1	49.5	49.5	42.0333	12.9326
457000	26.8	51.8	51.8	43.4667	14.4338
457500	22.6	49.5	49.5	40.5333	15.5307
458000	22.8	48.3	48.3	39.8	14.7224
458500	24.7	48.5	48.5	40.5667	13.7409
459000	22.4	46.7	46.7	38.6	14.0296
459500	26	56.5	54.6	45.7	17.0871
460000	20.4	46.5	42	36.3	13.9524
460500	32.6	54.6	52.9	46.7	12.2405
461000	29.2	42.9	42.9	38.3333	7.9097
461500	30.6	49.8	49.8	43.4	11.0851
462000	28.7	49.8	49.8	42.7667	12.1821
462500	26.5	48.3	48.3	41.0333	12.5862
463000	24.4	42	42	36.1333	10.1614
463500	34.5	51.3	49.3	45.0333	9.17678
464000	23.3	40.8	40.8	34.9667	10.1036
464500	30.9	51	51	44.3	11.6047
465000	36.2	57.1	55.2	49.5	11.5572
465500	32.6	56.5	56.5	48.5333	13.7987
466000	32.8	50.8	50.8	44.8	10.3923
466500	33.3	53.5	51.5	46.1	11.1301
467000	38.6	58.1	58.1	51.6	11.2583
467500	18	41.3	41.3	33.5333	13.4523
468000	21	47.4	47.4	38.6	15.242
468500	38.8	57.8	57.8	51.4667	10.9697
469000	39.1	54.6	54.6	49.4333	8.94893
469500	30.9	56.2	56.2	47.7667	14.607
470000	33.7	58.5	58.5	50.2333	14.3183
470500	37	58.5	58.5	51.3333	12.413
471000	41.2	63.7	63.7	56.2	12.9904
471500	28.2	58.8	58.8	48.6	17.6669
472000	20.2	49.3	49.3	39.6	16.8009
472500	25.2	58.8	58.8	47.6	19.399
473000	33.3	52.9	52.9	46.3667	11.3161
473500	30.9	54.9	54.9	46.9	13.8564
474000	22.6	47.2	47.2	39	14.2028
474500	27	48.1	48.1	41.0667	12.1821
475000	28.1	49.3	49.3	42.2333	12.2398
475500	22.5	48.8	48.8	40.0333	15.1843
476000	25.4	45.7	45.7	38.9333	11.7202
476500	32.3	48.3	48.3	42.9667	9.2376
477000	21.4	52.1	52.1	41.8667	17.7247
477500	29.8	50.8	50.8	43.8	12.1244
478000	25.4	55.2	55.2	45.2667	17.205
478500	26.2	44.1	42.2	37.5	9.83209
479000	26	55.9	55.9	45.9333	17.2628
479500	27.2	50.8	50.8	42.9333	13.6255
480000	18.2	57.1	57.1	44.1333	22.4589
480500	27.4	53.2	53.2	44.6	14.8956
481000	25.7	46.5	44.6	38.9333	11.4997
481500	36	54.9	54.9	48.6	10.9119
482000	26	44.6	44.6	38.4	10.7387
482500	26.9	51.8	51.8	43.5	14.376
483000	19.8	61	59.2	46.6667	23.2846
483500	20.4	52.1	52.1	41.5333	18.302
484000	8.2	52.1	52.1	37.4667	25.3457
484500	14.2	49.8	49.8	37.9333	20.5537
485000	13.2	43.3	43.3	33.2667	17.3782
485500	23.2	49	49	40.4	14.8956
486000	15.2	49.5	49.5	38.0667	19.8031
486500	14.5	39.7	39.7	31.3	14.5492
487000	32.1	58.1	58.1	49.4333	15.0111
487500	17.3	49	49	38.4333	18.302
488000	19.2	52.6	52.6	41.4667	19.2835
488500	21.3	50.8	50.8	40.9667	17.0318
489000	14.5	46.3	46.3	35.7	18.3597
489500	32.7	46.3	46.3	41.7667	7.85196
490000	28.9	52.1	52.1	44.3667	13.3945
490500	27.5	55.2	55.2	45.9667	15.9926
491000	19.4	49.5	47.6	38.8333	16.8566
491500	23.3	40	38.2	33.8333	9.16642
492000	12.1	41.3	41.3	31.5667	16.8586
492500	22.2	42.9	42.9	36	11.9512
493000	29.5	46.5	46.5	40.8333	9.81495
493500	20.3	52.1	52.1	41.5	18.3597
494000	19	39.2	37.3	31.8333	11.1545
494500	13	39.7	39.7	30.8	15.4153
495000	20.4	44.6	44.6	36.5333	13.9719
495500	13.8	43.3	43.3	33.4667	17.0318
496000	26.2	51.3	51.3	42.9333	14.4915
496500	28.1	42.7	40.8	37.2	7.93788
497000	26.2	52.6	52.6	43.8	15.242
497500	21.9	65.4	65.4	50.9	25.1147
498000	17.2	41.5	41.5	33.4	14.0296
498500	19.8	46.7	46.7	37.7333	15.5307
499000	22.3	45.7	45.7	37.9	13.51
499500	22.8	47.4	47.4	39.2	14.2028
500000	26.7	41.7	39.7	36.0333	8.14453
500500	16.7	39.1	39.1	31.6333	12.9326
501000	24.3	42.9	42.9	36.7	10.7387
501500	22.2	40.7	40.7	34.5333	10.681
502000	29.6	46.5	46.5	40.8667	9.75722
502500	12.8	46.1	46.1	35	19.2258
503000	27.1	49	49	41.7	12.644
503500	31.9	49.3	49.3	43.5	10.0459
504000	30.5	52.1	52.1	44.9	12.4708
504500	27.1	43.3	43.3	37.9	9.35307
505000	12.6	38.3	38.3	29.7333	14.8379
505500	30.5	47.6	47.6	41.9	9.87269
506000	33.8	51.8	51.8	45.8	10.3923
506500	25.7	48.1	46.3	40.0333	12.4456
507000	24.2	48.5	48.5	40.4	14.0296
507500	23.4	51.5	51.5	42.1333	16.2235
508000	24.9	53.2	53.2	43.7667	16.339
508500	23.8	50.3	48.3	40.8	14.7564
509000	27.3	51.8	51.8	43.6333	14.1451
509500	22.9	48.1	48.1	39.7	14.5492
510000	17.1	43.1	43.1	34.4333	15.0111
510500	19.4	46.9	46.9	37.7333	15.8771
511000	23.8	44.8	44.8	37.8	12.1244
511500	18.3	45.9	45.9	36.7	15.9349
512000	23.4	48.8	48.8	40.3333	14.6647
512500	17.9	46.5	46.5	36.9667	16.5122
513000	23.6	45.5	45.5	38.2	12.644
513500	20	41.8	40	33.9333	12.1001
514000	28.1	49.5	49.5	42.3667	12.3553
514500	28.9	48.3	48.3	41.8333	11.2006
515000	24.3	42.9	42.9	36.7	10.7387
515500	30.7	42.2	42.2	38.3667	6.63953
516000	22.4	39.2	39.2	33.6	9.69948
516500	19.8	52.6	52.6	41.6667	18.9371
517000	27.5	50.8	50.8	43.0333	13.4523
517500	34.7	54.1	54.1	47.6333	11.2006
518000	31.3	33.2	33.2	32.5667	1.09697
518500	22.8	41.8	41.8	35.4667	10.9697
519000	14.6	33.8	33.8	27.4	11.0851
519500	26.4	46.9	46.9	40.0667	11.8357
520000	22.6	48.5	48.5	39.8667	14.9534
520500	24.2	50.3	50.3	41.6	15.0688
521000	22	46.5	46.5	38.3333	14.1451
521500	28.7	51.8	51.8	44.1	13.3368
522000	20.1	52.9	52.9	41.9667	18.9371
522500	31.1	47.6	47.6	42.1	9.52628
523000	25.4	46.7	46.7	39.6	12.2976
523500	28.7	52.6	52.6	44.6333	13.7987
524000	26.7	48.8	48.8	41.4333	12.7594
524500	35	48.5	48.5	44	7.79423
525000	19.6	41.8	41.8	34.4	12.8172
525500	24.9	42.2	42.2	36.4333	9.98816
526000	19.6	43.1	43.1	35.2667	13.5677
526500	16.4	38.5	38.5	31.1333	12.7594
527000	15.7	38.3	38.3	30.7667	13.0481
527500	30.9	49	49	42.9667	10.45
528000	28.6	41	41	36.8667	7.15914
528500	21.4	43.7	43.7	36.2667	12.8749
529000	33.2	54.9	52.9	47	11.9929
529500	25.1	46.3	46.3	39.2333	12.2398
530000	30.6	52.1	52.1	44.9333	12.413
530500	12.4	37.6	35.7	28.5667	14.0329
531000	12.4	37.5	37.5	29.1333	14.4915
531500	20.7	40.3	38.5	33.1667	10.8339
532000	26.9	43.1	43.1	37.7	9.35307
532500	23.1	50	48.1	40.4	15.0123
533000	19.4	44.6	44.6	36.2	14.5492
533500	24.2	45	45	38.0667	12.0089
534000	29.1	40.7	40.7	36.8333	6.69726
534500	28.8	50	50	42.9333	12.2398
535000	27.1	46.1	46.1	39.7667	10.9697
535500	28.4	48.5	48.5	41.8	11.6047
536000	19.3	43.9	43.9	35.7	14.2028
536500	15.9	41.3	41.3	32.8333	14.6647
537000	20.4	37.6	37.6	31.8667	9.93042
537500	20.7	38	36.4	31.7	9.55981
538000	22.5	43.5	43.5	36.5	12.1244
538500	30.4	49.8	49.8	43.3333	11.2006
539000	21.9	39.4	39.4	33.5667	10.1036
539500	17.2	39.7	39.7	32.2	12.9904
540000	27.1	44.4	44.4	38.6333	9.98816
540500	21.4	42.6	42.6	35.5333	12.2398
541000	25.1	46.7	44.6	38.8	11.9109
541500	23.3	46.3	44.4	38	12.766
542000	22.9	48.5	48.5	39.9667	14.7802
542500	20.2	47.8	47.8	38.6	15.9349
543000	27.9	41.8	39.8	36.5	7.51465
543500	22.4	44.1	44.1	36.8667	12.5285
544000	16.8	40.3	38.5	31.8667	13.0791
544500	16.8	33.6	33.6	28	9.69948
545000	23.1	37	37	32.3667	8.02517
545500	14.3	38.9	38.9	30.7	14.2028
546000	16.2	47.6	47.6	37.1333	18.1288
546500	17.1	43.9	43.9	34.9667	15.473
547000	25.3	49.8	49.8	41.6333	14.1451
547500	18	41.5	39.7	33.0667	13.0791
548000	27.2	47.6	47.6	40.8	11.7779
548500	25.9	48.1	48.1	40.7	12.8172
549000	20.6	43.3	43.3	35.7333	13.1059
549500	19.3	39.4	39.4	32.7	11.6047
550000	23.4	41	41	35.1333	10.1614
550500	22.6	41.3	41.3	35.0667	10.7965
551000	15.7	38.9	38.9	31.1667	13.3945
551500	17.4	41.3	39.4	32.7	13.2842
552000	21	45.2	45.2	37.1333	13.9719
552500	20.7	35.3	35.3	30.4333	8.42931
553000	28.1	42.2	42.2	37.5	8.14064
553500	24.6	36.1	36.1	32.2667	6.63953
554000	17.8	36.9	36.9	30.5333	11.0274
554500	25.4	40.8	40.8	35.6667	8.89119
555000	24.9	50.8	50.8	42.1667	14.9534
555500	15.6	46.9	45	35.8333	17.5483
556000	24	44.6	44.6	37.7333	11.8934
556500	30.8	48.3	48.3	42.4667	10.1036
557000	25.8	54.3	54.3	44.8	16.4545
557500	26.7	44.6	44.6	38.6333	10.3346
558000	20.9	47.2	47.2	38.4333	15.1843
558500	26.5	53.2	53.2	44.3	15.4153
559000	23.4	49.5	49.5	40.8	15.0688
559500	15.9	34.8	34.8	28.5	10.9119
560000	19	34.2	34.2	29.1333	8.77572
560500	28.6	47.8	47.8	41.4	11.0851
561000	22.9	42.7	40.8	35.4667	10.9244
561500	23.5	50.5	50.5	41.5	15.5885
562000	22.3	50.5	50.5	41.1	16.2813
562500	19.9	38.9	38.9	32.5667	10.9697
563000	15.3	36.9	36.9	29.7	12.4708
563500	23	46.1	46.1	38.4	13.3368
564000	31	55.9	55.9	47.6	14.376
564500	19.5	51.8	51.8	41.0333	18.6484
565000	8.3	44.1	42	31.4667	20.0904
565500	22.6	52.9	52.9	42.8	17.4937
566000	18.5	47.4	47.4	37.7667	16.6854
566500	24.3	43.1	41	36.1333	10.3016
567000	16.9	39.5	39.5	31.9667	13.0481
567500	25.1	49.5	49.5	41.3667	14.0873
568000	20	42	42	34.6667	12.7017
568500	28.3	51	51	43.4333	13.1059
569000	18.9	47.2	47.2	37.7667	16.339
569500	31.3	50	50	43.7667	10.7965
570000	22.6	49.5	49.5	40.5333	15.5307
570500	34	48.5	46.5	43	7.85812
571000	19.4	54.3	54.3	42.6667	20.1495
571500	18.4	53.2	53.2	41.6	20.0918
572000	28.7	47.8	47.8	41.4333	11.0274
572500	22.7	38	38	32.9	8.83346
573000	23.1	46.3	46.3	38.5667	13.3945
573500	25.4	41.3	41.3	36	9.17987
574000	17.6	29.4	27.5	24.8333	6.33588
574500	24.3	42.9	41	36.0667	10.2344
575000	23.9	47.4	45.5	38.9333	13.0539
575500	13.5	36.6	36.6	28.9	13.3368
576000	19.4	42.2	42.2	34.6	13.1636
576500	13.2	47.2	47.2	35.8667	19.6299
577000	18	49.3	49.3	38.8667	18.0711
577500	18.1	44.4	44.4	35.6333	15.1843
578000	16.7	40.8	40.8	32.7667	13.9141
578500	14.7	43.9	43.9	34.1667	16.8586
579000	19.5	49.5	47.6	38.8667	16.7989
579500	19.1	43.5	43.5	35.3667	14.0873
580000	25.5	41.8	41.8	36.3667	9.41081
580500	18.4	53.8	53.8	42	20.4382
581000	18.6	50	50	39.5333	18.1288
581500	19.6	37.6	37.6	31.6	10.3923
582000	24	41.2	41.2	35.4667	9.93042
582500	20.9	42.9	42.9	35.5667	12.7017
583000	20.6	46.3	46.3	37.7333	14.8379
583500	14.4	46.5	46.5	35.8	18.5329
584000	20.1	42	42	34.7	12.644
584500	24.3	41.3	41.3	35.6333	9.81495
585000	15.2	39.7	39.7	31.5333	14.1451
585500	14.1	31.5	31.5	25.7	10.0459
586000	22.5	39.4	39.4	33.7667	9.75722
586500	25.8	38.8	38.8	34.4667	7.50555
587000	15.3	34	34	27.7667	10.7965
587500	20.1	46.5	46.5	37.7	15.242
588000	30.2	46.3	46.3	40.9333	9.29534
588500	23.3	40.8	40.8	34.9667	10.1036
589000	30.3	48.8	48.8	42.6333	10.681
589500	20.9	41.8	41.8	34.8333	12.0666
590000	33.3	56.5	56.5	48.7667	13.3945
590500	32.5	44.6	44.6	40.5667	6.98594
591000	35.5	55.2	55.2	48.6333	11.3738
591500	30.1	50.3	50.3	43.5667	11.6625
592000	30.9	44.4	44.4	39.9	7.79423
592500	14.3	31.6	29.8	25.2333	9.51122
593000	19.5	41	41	33.8333	12.413
593500	12.7	41.2	41.2	31.7	16.4545
594000	18	48.3	48.3	38.2	17.4937
594500	17.2	45.9	45.9	36.3333	16.57
595000	25.1	55.2	55.2	45.1667	17.3782
595500	22.5	47.8	47.8	39.3667	14.607
596000	25.3	50.8	50.8	42.3	14.7224
596500	27.5	55.6	55.6	46.2333	16.2235
597000	16.4	42.6	42.6	33.8667	15.1266
597500	21.4	45.2	45.2	37.2667	13.7409
598000	23.3	40.3	40.3	34.6333	9.81495
598500	17	47.4	47.4	37.2667	17.5514
599000	33.8	52.6	52.6	46.3333	10.8542
599500	24.7	43.7	43.7	37.3667	10.9697
600000	21.4	40.8	40.8	34.3333	11.2006
600500	12.5	44.2	44.2	33.6333	18.302
601000	26.9	51.8	51.8	43.5	14.376
601500	19.8	61	59.2	46.6667	23.2846
602000	20.4	52.1	52.1	41.5333	18.302
602500	8.2	52.1	52.1	37.4667	25.3457
603000	14.2	49.8	49.8	37.9333	20.5537
603500	13.2	43.3	43.3	33.2667	17.3782
604000	23.2	49	49	40.4	14.8956
604500	15.2	49.5	49.5	38.0667	19.8031
605000	14.5	39.7	39.7	31.3	14.5492
605500	32.1	58.1	58.1	49.4333	15.0111
606000	17.3	49	49	38.4333	18.302
606500	19.2	52.6	52.6	41.4667	19.2835
607000	21.3	50.8	50.8	40.9667	17.0318
607500	14.5	46.3	46.3	35.7	18.3597
608000	32.7	46.3	46.3	41.7667	7.85196
608500	28.9	52.1	52.1	44.3667	13.3945
609000	27.5	55.2	55.2	45.9667	15.9926
609500	19.4	49.5	47.6	38.8333	16.8566
610000	23.3	40	38.2	33.8333	9.16642
610500	12.1	41.3	41.3	31.5667	16.8586
611000	22.2	42.9	42.9	36	11.9512
611500	29.5	46.5	46.5	40.8333	9.81495
612000	20.3	52.1	52.1	41.5	18.3597
612500	19	39.2	37.3	31.8333	11.1545
613000	13	39.7	39.7	30.8	15.4153
613500	20.4	44.6	44.6	36.5333	13.9719
614000	13.8	43.3	43.3	33.4667	17.0318
614500	26.2	51.3	51.3	42.9333	14.4915
615000	28.1	42.7	40.8	37.2	7.93788
615500	26.2	52.6	52.6	43.8	15.242
616000	21.9	65.4	65.4	50.9	25.1147
616500	17.2	41.5	41.5	33.4	14.0296
617000	19.8	46.7	46.7	37.7333	15.5307
617500	22.3	45.7	45.7	37.9	13.51
618000	22.8	47.4	47.4	39.2	14.2028
618500	26.7	41.7	39.7	36.0333	8.14453
619000	16.7	39.1	39.1	31.6333	12.9326
619500	24.3	42.9	42.9	36.7	10.7387
620000	22.2	40.7	40.7	34.5333	10.681
620500	29.6	46.5	46.5	40.8667	9.75722
621000	12.8	46.1	46.1	35	19.2258
621500	27.1	49	49	41.7	12.644
622000	31.9	49.3	49.3	43.5	10.0459
622500	30.5	52.1	52.1	44.9	12.4708
623000	27.1	43.3	43.3	37.9	9.35307
623500	12.6	38.3	38.3	29.7333	14.8379
624000	30.5	47.6	47.6	41.9	9.87269
624500	33.8	51.8	51.8	45.8	10.3923
625000	25.7	48.1	46.3	40.0333	12.4456
625500	24.2	48.5	48.5	40.4	14.0296
626000	23.4	51.5	51.5	42.1333	16.2235
626500	24.9	53.2	53.2	43.7667	16.339
627000	23.8	50.3	48.3	40.8	14.7564
627500	27.3	51.8	51.8	43.6333	14.1451
628000	22.9	48.1	48.1	39.7	14.5492
628500	17.1	43.1	43.1	34.4333	15.0111
629000	19.4	46.9	46.9	37.7333	15.8771
629500	23.8	44.8	44.8	37.8	12.1244
630000	18.3	45.9	45.9	36.7	15.9349
630500	23.4	48.8	48.8	40.3333	14.6647
631000	17.9	46.5	46.5	36.9667	16.5122
631500	23.6	45.5	45.5	38.2	12.644
632000	20	41.8	40	33.9333	12.1001
632500	28.1	49.5	49.5	42.3667	12.3553
633000	28.9	48.3	48.3	41.8333	11.2006
633500	24.3	42.9	42.9	36.7	10.7387
634000	30.7	42.2	42.2	38.3667	6.63953
634500	22.4	39.2	39.2	33.6	9.69948
635000	19.8	52.6	52.6	41.6667	18.9371
635500	27.5	50.8	50.8	43.0333	13.4523
636000	34.7	54.1	54.1	47.6333	11.2006
636500	31.3	33.2	33.2	32.5667	1.09697
637000	22.8	41.8	41.8	35.4667	10.9697
637500	14.6	33.8	33.8	27.4	11.0851
638000	26.4	46.9	46.9	40.0667	11.8357
638500	22.6	48.5	48.5	39.8667	14.9534
639000	24.2	50.3	50.3	41.6	15.0688
639500	22	46.5	46.5	38.3333	14.1451
640000	28.7	51.8	51.8	44.1	13.3368
640500	20.1	52.9	52.9	41.9667	18.9371
641000	31.1	47.6	47.6	42.1	9.52628
641500	25.4	46.7	46.7	39.6	12.2976
642000	28.7	52.6	52.6	44.6333	13.7987
642500	26.7	48.8	48.8	41.4333	12.7594
643000	35	48.5	48.5	44	7.79423
643500	19.6	41.8	41.8	34.4	12.8172
644000	24.9	42.2	42.2	36.4333	9.98816
644500	19.6	43.1	43.1	35.2667	13.5677
645000	16.4	38.5	38.5	31.1333	12.7594
645500	15.7	38.3	38.3	30.7667	13.0481
646000	30.9	49	49	42.9667	10.45
646500	28.6	41	41	36.8667	7.15914
647000	21.4	43.7	43.7	36.2667	12.8749
647500	33.2	54.9	52.9	47	11.9929
648000	25.1	46.3	46.3	39.2333	12.2398
648500	30.6	52.1	52.1	44.9333	12.413
649000	12.4	37.6	35.7	28.5667	14.0329
649500	12.4	37.5	37.5	29.1333	14.4915
650000	20.7	40.3	38.5	33.1667	10.8339
650500	26.9	43.1	43.1	37.7	9.35307
651000	23.1	50	48.1	40.4	15.0123
651500	19.4	44.6	44.6	36.2	14.5492
652000	24.2	45	45	38.0667	12.0089
652500	29.1	40.7	40.7	36.8333	6.69726
653000	28.8	50	50	42.9333	12.2398
653500	27.1	46.1	46.1	39.7667	10.9697
654000	28.4	48.5	48.5	41.8	11.6047
654500	19.3	43.9	43.9	35.7	14.2028
655000	15.9	41.3	41.3	32.8333	14.6647
655500	20.4	37.6	37.6	31.8667	9.93042
656000	20.7	38	36.4	31.7	9.55981
656500	22.5	43.5	43.5	36.5	12.1244
657000	30.4	49.8	49.8	43.3333	11.2006
657500	21.9	39.4	39.4	33.5667	10.1036
658000	17.2	39.7	39.7	32.2	12.9904
658500	27.1	44.4	44.4	38.6333	9.98816
659000	21.4	42.6	42.6	35.5333	12.2398
659500	25.1	46.7	44.6	38.8	11.9109
660000	23.3	46.3	44.4	38	12.766
660500	22.9	48.5	48.5	39.9667	14.7802
661000	20.2	47.8	47.8	38.6	15.9349
661500	27.9	41.8	39.8	36.5	7.51465
662000	22.4	44.1	44.1	36.8667	12.5285
662500	16.8	40.3	38.5	31.8667	13.0791
663000	16.8	33.6	33.6	28	9.69948
663500	23.1	37	37	32.3667	8.02517
664000	14.3	38.9	38.9	30.7	14.2028
664500	16.2	47.6	47.6	37.1333	18.1288
665000	17.1	43.9	43.9	34.9667	15.473
665500	25.3	49.8	49.8	41.6333	14.1451
666000	18	41.5	39.7	33.0667	13.0791
666500	27.2	47.6	47.6	40.8	11.7779
667000	25.9	48.1	48.1	40.7	12.8172
667500	20.6	43.3	43.3	35.7333	13.1059
668000	19.3	39.4	39.4	32.7	11.6047
668500	23.4	41	41	35.1333	10.1614
669000	22.6	41.3	41.3	35.0667	10.7965
669500	15.7	38.9	38.9	31.1667	13.3945
670000	17.4	41.3	39.4	32.7	13.2842
670500	21	45.2	45.2	37.1333	13.9719
671000	20.7	35.3	35.3	30.4333	8.42931
671500	28.1	42.2	42.2	37.5	8.14064
672000	24.6	36.1	36.1	32.2667	6.63953
672500	17.8	36.9	36.9	30.5333	11.0274
673000	25.4	40.8	40.8	35.6667	8.89119
673500	24.9	50.8	50.8	42.1667	14.9534
674000	15.6	46.9	45	35.8333	17.5483
674500	24	44.6	44.6	37.7333	11.8934
675000	30.8	48.3	48.3	42.4667	10.1036
675500	25.8	54.3	54.3	44.8	16.4545
676000	26.7	44.6	44.6	38.6333	10.3346
676500	20.9	47.2	47.2	38.4333	15.1843
677000	26.5	53.2	53.2	44.3	15.4153
677500	23.4	49.5	49.5	40.8	15.0688
678000	15.9	34.8	34.8	28.5	10.9119
678500	19	34.2	34.2	29.1333	8.77572
679000	28.6	47.8	47.8	41.4	11.0851
679500	22.9	42.7	40.8	35.4667	10.9244
680000	23.5	50.5	50.5	41.5	15.5885
680500	22.3	50.5	50.5	41.1	16.2813
681000	19.9	38.9	38.9	32.5667	10.9697
681500	15.3	36.9	36.9	29.7	12.4708
682000	23	46.1	46.1	38.4	13.3368
682500	31	55.9	55.9	47.6	14.376
683000	19.5	51.8	51.8	41.0333	18.6484
683500	8.3	44.1	42	31.4667	20.0904
684000	22.6	52.9	52.9	42.8	17.4937
684500	18.5	47.4	47.4	37.7667	16.6854
685000	24.3	43.1	41	36.1333	10.3016
685500	16.9	39.5	39.5	31.9667	13.0481
686000	25.1	49.5	49.5	41.3667	14.0873
686500	20	42	42	34.6667	12.7017
687000	28.3	51	51	43.4333	13.1059
687500	18.9	47.2	47.2	37.7667	16.339
688000	31.3	50	50	43.7667	10.7965
688500	22.6	49.5	49.5	40.5333	15.5307
689000	34	48.5	46.5	43	7.85812
689500	19.4	54.3	54.3	42.6667	20.1495
690000	18.4	53.2	53.2	41.6	20.0918
690500	28.7	47.8	47.8	41.4333	11.0274
691000	22.7	38	38	32.9	8.83346
691500	23.1	46.3	46.3	38.5667	13.3945
692000	25.4	41.3	41.3	36	9.17987
692500	17.6	29.4	27.5	24.8333	6.33588
693000	24.3	42.9	41	36.0667	10.2344
693500	23.9	47.4	45.5	38.9333	13.0539
694000	13.5	36.6	36.6	28.9	13.3368
694500	19.4	42.2	42.2	34.6	13.1636
695000	13.2	47.2	47.2	35.8667	19.6299
695500	18	49.3	49.3	38.8667	18.0711
696000	18.1	44.4	44.4	35.6333	15.1843
696500	16.7	40.8	40.8	32.7667	13.9141
697000	14.7	43.9	43.9	34.1667	16.8586
697500	19.5	49.5	47.6	38.8667	16.7989
698000	19.1	43.5	43.5	35.3667	14.0873
698500	25.5	41.8	41.8	36.3667	9.41081
699000	18.4	53.8	53.8	42	20.4382
699500	18.6	50	50	39.5333	18.1288
700000	19.6	37.6	37.6	31.6	10.3923
700500	24	41.2	41.2	35.4667	9.93042
701000	20.9	42.9	42.9	35.5667	12.7017
701500	20.6	46.3	46.3	37.7333	14.8379
702000	14.4	46.5	46.5	35.8	18.5329
702500	20.1	42	42	34.7	12.644
703000	24.3	41.3	41.3	35.6333	9.81495
703500	15.2	39.7	39.7	31.5333	14.1451
704000	14.1	31.5	31.5	25.7	10.0459
704500	22.5	39.4	39.4	33.7667	9.75722
705000	25.8	38.8	38.8	34.4667	7.50555
705500	15.3	34	34	27.7667	10.7965
706000	20.1	46.5	46.5	37.7	15.242
706500	30.2	46.3	46.3	40.9333	9.29534
707000	23.3	40.8	40.8	34.9667	10.1036
707500	30.3	48.8	48.8	42.6333	10.681
708000	20.9	41.8	41.8	34.8333	12.0666
708500	33.3	56.5	56.5	48.7667	13.3945
709000	32.5	44.6	44.6	40.5667	6.98594
709500	35.5	55.2	55.2	48.6333	11.3738
710000	30.1	50.3	50.3	43.5667	11.6625
710500	30.9	44.4	44.4	39.9	7.79423
711000	14.3	31.6	29.8	25.2333	9.51122
711500	19.5	41	41	33.8333	12.413
712000	12.7	41.2	41.2	31.7	16.4545
712500	18	48.3	48.3	38.2	17.4937
713000	17.2	45.9	45.9	36.3333	16.57
713500	25.1	55.2	55.2	45.1667	17.3782
714000	22.5	47.8	47.8	39.3667	14.607
714500	25.3	50.8	50.8	42.3	14.7224
715000	27.5	55.6	55.6	46.2333	16.2235
715500	16.4	42.6	42.6	33.8667	15.1266
716000	21.4	45.2	45.2	37.2667	13.7409
716500	23.3	40.3	40.3	34.6333	9.81495
717000	17	47.4	47.4	37.2667	17.5514
717500	33.8	52.6	52.6	46.3333	10.8542
718000	24.7	43.7	43.7	37.3667	10.9697
718500	21.4	40.8	40.8	34.3333	11.2006
719000	12.5	44.2	44.2	33.6333	18.302
719500	26.9	51.8	51.8	43.5	14.376
720000	19.8	61	59.2	46.6667	23.2846
720500	20.4	52.1	52.1	41.5333	18.302
721000	8.2	52.1	52.1	37.4667	25.3457
721500	14.2	49.8	49.8	37.9333	20.5537
722000	13.2	43.3	43.3	33.2667	17.3782
722500	23.2	49	49	40.4	14.8956
723000	15.2	49.5	49.5	38.0667	19.8031
723500	14.5	39.7	39.7	31.3	14.5492
724000	32.1	58.1	58.1	49.4333	15.0111
724500	17.3	49	49	38.4333	18.302
725000	19.2	52.6	52.6	41.4667	19.2835
725500	21.3	50.8	50.8	40.9667	17.0318
726000	14.5	46.3	46.3	35.7	18.3597
726500	32.7	46.3	46.3	41.7667	7.85196
727000	28.9	52.1	52.1	44.3667	13.3945
727500	27.5	55.2	55.2	45.9667	15.9926
728000	19.4	49.5	47.6	38.8333	16.8566
728500	23.3	40	38.2	33.8333	9.16642
729000	12.1	41.3	41.3	31.5667	16.8586
729500	22.2	42.9	42.9	36	11.9512
730000	29.5	46.5	46.5	40.8333	9.81495
730500	20.3	52.1	52.1	41.5	18.3597
731000	19	39.2	37.3	31.8333	11.1545
731500	13	39.7	39.7	30.8	15.4153
732000	20.4	44.6	44.6	36.5333	13.9719
732500	13.8	43.3	43.3	33.4667	17.0318
733000	26.2	51.3	51.3	42.9333	14.4915
733500	28.1	42.7	40.8	37.2	7.93788
734000	26.2	52.6	52.6	43.8	15.242
734500	21.9	65.4	65.4	50.9	25.1147
735000	17.2	41.5	41.5	33.4	14.0296
735500	19.8	46.7	46.7	37.7333	15.5307
736000	22.3	45.7	45.7	37.9	13.51
736500	22.8	47.4	47.4	39.2	14.2028
737000	26.7	41.7	39.7	36.0333	8.14453
737500	16.7	39.1	39.1	31.6333	12.9326
738000	24.3	42.9	42.9	36.7	10.7387
738500	22.2	40.7	40.7	34.5333	10.681
739000	29.6	46.5	46.5	40.8667	9.75722
739500	12.8	46.1	46.1	35	19.2258
740000	27.1	49	49	41.7	12.644
740500	31.9	49.3	49.3	43.5	10.0459
741000	30.5	52.1	52.1	44.9	12.4708
741500	27.1	43.3	43.3	37.9	9.35307
742000	12.6	38.3	38.3	29.7333	14.8379
742500	30.5	47.6	47.6	41.9	9.87269
743000	33.8	51.8	51.8	45.8	10.3923
743500	25.7	48.1	46.3	40.0333	12.4456
744000	24.2	48.5	48.5	40.4	14.0296
744500	23.4	51.5	51.5	42.1333	16.2235
745000	24.9	53.2	53.2	43.7667	16.339
745500	23.8	50.3	48.3	40.8	14.7564
746000	27.3	51.8	51.8	43.6333	14.1451
746500	22.9	48.1	48.1	39.7	14.5492
747000	17.1	43.1	43.1	34.4333	15.0111
747500	19.4	46.9	46.9	37.7333	15.8771
748000	23.8	44.8	44.8	37.8	12.1244
748500	18.3	45.9	45.9	36.7	15.9349
749000	23.4	48.8	48.8	40.3333	14.6647
749500	17.9	46.5	46.5	36.9667	16.5122
750000	23.6	45.5	45.5	38.2	12.644
750500	20	41.8	40	33.9333	12.1001
751000	28.1	49.5	49.5	42.3667	12.3553
751500	28.9	48.3	48.3	41.8333	11.2006
752000	24.3	42.9	42.9	36.7	10.7387
752500	30.7	42.2	42.2	38.3667	6.63953
753000	22.4	39.2	39.2	33.6	9.69948
753500	19.8	52.6	52.6	41.6667	18.9371
754000	27.5	50.8	50.8	43.0333	13.4523
754500	34.7	54.1	54.1	47.6333	11.2006
755000	31.3	33.2	33.2	32.5667	1.09697
755500	22.8	41.8	41.8	35.4667	10.9697
756000	14.6	33.8	33.8	27.4	11.0851
756500	26.4	46.9	46.9	40.0667	11.8357
757000	22.6	48.5	48.5	39.8667	14.9534
757500	24.2	50.3	50.3	41.6	15.0688
758000	22	46.5	46.5	38.3333	14.1451
758500	28.7	51.8	51.8	44.1	13.3368
759000	20.1	52.9	52.9	41.9667	18.9371
759500	31.1	47.6	47.6	42.1	9.52628
760000	25.4	46.7	46.7	39.6	12.2976
760500	28.7	52.6	52.6	44.6333	13.7987
761000	26.7	48.8	48.8	41.4333	12.7594
761500	35	48.5	48.5	44	7.79423
762000	19.6	41.8	41.8	34.4	12.8172
762500	24.9	42.2	42.2	36.4333	9.98816
763000	19.6	43.1	43.1	35.2667	13.5677
763500	16.4	38.5	38.5	31.1333	12.7594
764000	15.7	38.3	38.3	30.7667	13.0481
764500	30.9	49	49	42.9667	10.45
765000	28.6	41	41	36.8667	7.15914
765500	21.4	43.7	43.7	36.2667	12.8749
766000	33.2	54.9	52.9	47	11.9929
766500	25.1	46.3	46.3	39.2333	12.2398
767000	30.6	52.1	52.1	44.9333	12.413
767500	12.4	37.6	35.7	28.5667	14.0329
768000	12.4	37.5	37.5	29.1333	14.4915
768500	20.7	40.3	38.5	33.1667	10.8339
769000	26.9	43.1	43.1	37.7	9.35307
769500	23.1	50	48.1	40.4	15.0123
770000	19.4	44.6	44.6	36.2	14.5492
770500	24.2	45	45	38.0667	12.0089
771000	29.1	40.7	40.7	36.8333	6.69726
771500	28.8	50	50	42.9333	12.2398
772000	27.1	46.1	46.1	39.7667	10.9697
772500	28.4	48.5	48.5	41.8	11.6047
773000	19.3	43.9	43.9	35.7	14.2028
773500	15.9	41.3	41.3	32.8333	14.6647
774000	20.4	37.6	37.6	31.8667	9.93042
774500	20.7	38	36.4	31.7	9.55981
775000	22.5	43.5	43.5	36.5	12.1244
775500	30.4	49.8	49.8	43.3333	11.2006
776000	21.9	39.4	39.4	33.5667	10.1036
776500	17.2	39.7	39.7	32.2	12.9904
777000	27.1	44.4	44.4	38.6333	9.98816
777500	21.4	42.6	42.6	35.5333	12.2398
778000	25.1	46.7	44.6	38.8	11.9109
778500	23.3	46.3	44.4	38	12.766
779000	22.9	48.5	48.5	39.9667	14.7802
779500	20.2	47.8	47.8	38.6	15.9349
780000	27.9	41.8	39.8	36.5	7.51465
780500	22.4	44.1	44.1	36.8667	12.5285
781000	16.8	40.3	38.5	31.8667	13.0791
781500	16.8	33.6	33.6	28	9.69948
782000	23.1	37	37	32.3667	8.02517
782500	14.3	38.9	38.9	30.7	14.2028
783000	16.2	47.6	47.6	37.1333	18.1288
783500	17.1	43.9	43.9	34.9667	15.473
784000	25.3	49.8	49.8	41.6333	14.1451
784500	18	41.5	39.7	33.0667	13.0791
785000	27.2	47.6	47.6	40.8	11.7779
785500	25.9	48.1	48.1	40.7	12.8172
786000	20.6	43.3	43.3	35.7333	13.1059
786500	19.3	39.4	39.4	32.7	11.6047
787000	23.4	41	41	35.1333	10.1614
787500	22.6	41.3	41.3	35.0667	10.7965
788000	15.7	38.9	38.9	31.1667	13.3945
788500	17.4	41.3	39.4	32.7	13.2842
789000	21	45.2	45.2	37.1333	13.9719
789500	20.7	35.3	35.3	30.4333	8.42931
790000	28.1	42.2	42.2	37.5	8.14064
790500	24.6	36.1	36.1	32.2667	6.63953
791000	17.8	36.9	36.9	30.5333	11.0274
791500	25.4	40.8	40.8	35.6667	8.89119
792000	24.9	50.8	50.8	42.1667	14.9534
792500	15.6	46.9	45	35.8333	17.5483
793000	24	44.6	44.6	37.7333	11.8934
793500	30.8	48.3	48.3	42.4667	10.1036
794000	25.8	54.3	54.3	44.8	16.4545
794500	26.7	44.6	44.6	38.6333	10.3346
795000	20.9	47.2	47.2	38.4333	15.1843
795500	26.5	53.2	53.2	44.3	15.4153
796000	23.4	49.5	49.5	40.8	15.0688
796500	15.9	34.8	34.8	28.5	10.9119
797000	19	34.2	34.2	29.1333	8.77572
797500	28.6	47.8	47.8	41.4	11.0851
798000	22.9	42.7	40.8	35.4667	10.9244
798500	23.5	50.5	50.5	41.5	15.5885
799000	22.3	50.5	50.5	41.1	16.2813
799500	19.9	38.9	38.9	32.5667	10.9697
800000	15.3	36.9	36.9	29.7	12.4708
800500	23	46.1	46.1	38.4	13.3368
801000	31	55.9	55.9	47.6	14.376
801500	19.5	51.8	51.8	41.0333	18.6484
802000	8.3	44.1	42	31.4667	20.0904
802500	22.6	52.9	52.9	42.8	17.4937
803000	18.5	47.4	47.4	37.7667	16.6854
803500	24.3	43.1	41	36.1333	10.3016
804000	16.9	39.5	39.5	31.9667	13.0481
804500	25.1	49.5	49.5	41.3667	14.0873
805000	20	42	42	34.6667	12.7017
805500	28.3	51	51	43.4333	13.1059
806000	18.9	47.2	47.2	37.7667	16.339
806500	31.3	50	50	43.7667	10.7965
807000	22.6	49.5	49.5	40.5333	15.5307
807500	34	48.5	46.5	43	7.85812
808000	19.4	54.3	54.3	42.6667	20.1495
808500	18.4	53.2	53.2	41.6	20.0918
809000	28.7	47.8	47.8	41.4333	11.0274
809500	22.7	38	38	32.9	8.83346
810000	23.1	46.3	46.3	38.5667	13.3945
810500	25.4	41.3	41.3	36	9.17987
811000	17.6	29.4	27.5	24.8333	6.33588
811500	24.3	42.9	41	36.0667	10.2344
812000	23.9	47.4	45.5	38.9333	13.0539
812500	13.5	36.6	36.6	28.9	13.3368
813000	19.4	42.2	42.2	34.6	13.1636
813500	13.2	47.2	47.2	35.8667	19.6299
814000	18	49.3	49.3	38.8667	18.0711
814500	18.1	44.4	44.4	35.6333	15.1843
815000	16.7	40.8	40.8	32.7667	13.9141
815500	14.7	43.9	43.9	34.1667	16.8586
816000	19.5	49.5	47.6	38.8667	16.7989
816500	19.1	43.5	43.5	35.3667	14.0873
817000	25.5	41.8	41.8	36.3667	9.41081
817500	18.4	53.8	53.8	42	20.4382
818000	18.6	50	50	39.5333	18.1288
818500	19.6	37.6	37.6	31.6	10.3923
819000	24	41.2	41.2	35.4667	9.93042
819500	20.9	42.9	42.9	35.5667	12.7017
820000	20.6	46.3	46.3	37.7333	14.8379
820500	14.4	46.5	46.5	35.8	18.5329
821000	20.1	42	42	34.7	12.644
821500	24.3	41.3	41.3	35.6333	9.81495
822000	15.2	39.7	39.7	31.5333	14.1451
822500	14.1	31.5	31.5	25.7	10.0459
823000	22.5	39.4	39.4	33.7667	9.75722
823500	25.8	38.8	38.8	34.4667	7.50555
824000	15.3	34	34	27.7667	10.7965
824500	20.1	46.5	46.5	37.7	15.242
825000	30.2	46.3	46.3	40.9333	9.29534
825500	23.3	40.8	40.8	34.9667	10.1036
826000	30.3	48.8	48.8	42.6333	10.681
826500	20.9	41.8	41.8	34.8333	12.0666
827000	33.3	56.5	56.5	48.7667	13.3945
827500	32.5	44.6	44.6	40.5667	6.98594
828000	35.5	55.2	55.2	48.6333	11.3738
828500	30.1	50.3	50.3	43.5667	11.6625
829000	30.9	44.4	44.4	39.9	7.79423
829500	14.3	31.6	29.8	25.2333	9.51122
830000	19.5	41	41	33.8333	12.413
830500	12.7	41.2	41.2	31.7	16.4545
831000	18	48.3	48.3	38.2	17.4937
831500	17.2	45.9	45.9	36.3333	16.57
832000	25.1	55.2	55.2	45.1667	17.3782
832500	22.5	47.8	47.8	39.3667	14.607
833000	25.3	50.8	50.8	42.3	14.7224
833500	27.5	55.6	55.6	46.2333	16.2235
834000	16.4	42.6	42.6	33.8667	15.1266
834500	21.4	45.2	45.2	37.2667	13.7409
835000	23.3	40.3	40.3	34.6333	9.81495
835500	17	47.4	47.4	37.2667	17.5514
836000	33.8	52.6	52.6	46.3333	10.8542
836500	24.7	43.7	43.7	37.3667	10.9697
837000	21.4	40.8	40.8	34.3333	11.2006
837500	12.5	44.2	44.2	33.6333	18.302
838000	26.9	51.8	51.8	43.5	14.376
838500	19.8	61	59.2	46.6667	23.2846
839000	20.4	52.1	52.1	41.5333	18.302
839500	8.2	52.1	52.1	37.4667	25.3457
840000	14.2	49.8	49.8	37.9333	20.5537
840500	13.2	43.3	43.3	33.2667	17.3782
841000	23.2	49	49	40.4	14.8956
841500	15.2	49.5	49.5	38.0667	19.8031
842000	14.5	39.7	39.7	31.3	14.5492
842500	32.1	58.1	58.1	49.4333	15.0111
843000	17.3	49	49	38.4333	18.302
843500	19.2	52.6	52.6	41.4667	19.2835
844000	21.3	50.8	50.8	40.9667	17.0318
844500	14.5	46.3	46.3	35.7	18.3597
845000	32.7	46.3	46.3	41.7667	7.85196
845500	28.9	52.1	52.1	44.3667	13.3945
846000	27.5	55.2	55.2	45.9667	15.9926
846500	19.4	49.5	47.6	38.8333	16.8566
847000	23.3	40	38.2	33.8333	9.16642
847500	12.1	41.3	41.3	31.5667	16.8586
848000	22.2	42.9	42.9	36	11.9512
848500	29.5	46.5	46.5	40.8333	9.81495
849000	20.3	52.1	52.1	41.5	18.3597
849500	19	39.2	37.3	31.8333	11.1545
850000	13	39.7	39.7	30.8	15.4153
850500	20.4	44.6	44.6	36.5333	13.9719
851000	13.8	43.3	43.3	33.4667	17.0318
851500	26.2	51.3	51.3	42.9333	14.4915
852000	28.1	42.7	40.8	37.2	7.93788
852500	26.2	52.6	52.6	43.8	15.242
853000	21.9	65.4	65.4	50.9	25.1147
853500	17.2	41.5	41.5	33.4	14.0296
854000	19.8	46.7	46.7	37.7333	15.5307
854500	22.3	45.7	45.7	37.9	13.51
855000	22.8	47.4	47.4	39.2	14.2028
855500	26.7	41.7	39.7	36.0333	8.14453
856000	16.7	39.1	39.1	31.6333	12.9326
856500	24.3	42.9	42.9	36.7	10.7387
857000	22.2	40.7	40.7	34.5333	10.681
857500	29.6	46.5	46.5	40.8667	9.75722
858000	12.8	46.1	46.1	35	19.2258
858500	27.1	49	49	41.7	12.644
859000	31.9	49.3	49.3	43.5	10.0459
859500	30.5	52.1	52.1	44.9	12.4708
860000	27.1	43.3	43.3	37.9	9.35307
860500	12.6	38.3	38.3	29.7333	14.8379
861000	30.5	47.6	47.6	41.9	9.87269
861500	33.8	51.8	51.8	45.8	10.3923
862000	25.7	48.1	46.3	40.0333	12.4456
862500	24.2	48.5	48.5	40.4	14.0296
863000	23.4	51.5	51.5	42.1333	16.2235
863500	24.9	53.2	53.2	43.7667	16.339
864000	23.8	50.3	48.3	40.8	14.7564
864500	27.3	51.8	51.8	43.6333	14.1451
865000	22.9	48.1	48.1	39.7	14.5492
865500	17.1	43.1	43.1	34.4333	15.0111
866000	19.4	46.9	46.9	37.7333	15.8771
866500	23.8	44.8	44.8	37.8	12.1244
867000	18.3	45.9	45.9	36.7	15.9349
867500	23.4	48.8	48.8	40.3333	14.6647
868000	17.9	46.5	46.5	36.9667	16.5122
868500	23.6	45.5	45.5	38.2	12.644
869000	20	41.8	40	33.9333	12.1001
869500	28.1	49.5	49.5	42.3667	12.3553
870000	28.9	48.3	48.3	41.8333	11.2006
870500	24.3	42.9	42.9	36.7	10.7387
871000	30.7	42.2	42.2	38.3667	6.63953
871500	22.4	39.2	39.2	33.6	9.69948
872000	19.8	52.6	52.6	41.6667	18.9371
872500	27.5	50.8	50.8	43.0333	13.4523
873000	34.7	54.1	54.1	47.6333	11.2006
873500	31.3	33.2	33.2	32.5667	1.09697
874000	22.8	41.8	41.8	35.4667	10.9697
874500	14.6	33.8	33.8	27.4	11.0851
875000	26.4	46.9	46.9	40.0667	11.8357
875500	22.6	48.5	48.5	39.8667	14.9534
876000	24.2	50.3	50.3	41.6	15.0688
876500	22	46.5	46.5	38.3333	14.1451
877000	28.7	51.8	51.8	44.1	13.3368
877500	20.1	52.9	52.9	41.9667	18.9371
878000	31.1	47.6	47.6	42.1	9.52628
878500	25.4	46.7	46.7	39.6	12.2976
879000	28.7	52.6	52.6	44.6333	13.7987
879500	26.7	48.8	48.8	41.4333	12.7594
880000	35	48.5	48.5	44	7.79423
880500	19.6	41.8	41.8	34.4	12.8172
881000	24.9	42.2	42.2	36.4333	9.98816
881500	19.6	43.1	43.1	35.2667	13.5677
882000	16.4	38.5	38.5	31.1333	12.7594
882500	15.7	38.3	38.3	30.7667	13.0481
883000	30.9	49	49	42.9667	10.45
883500	28.6	41	41	36.8667	7.15914
884000	21.4	43.7	43.7	36.2667	12.8749
884500	33.2	54.9	52.9	47	11.9929
885000	25.1	46.3	46.3	39.2333	12.2398
885500	30.6	52.1	52.1	44.9333	12.413
886000	12.4	37.6	35.7	28.5667	14.0329
886500	12.4	37.5	37.5	29.1333	14.4915
887000	20.7	40.3	38.5	33.1667	10.8339
887500	26.9	43.1	43.1	37.7	9.35307
888000	23.1	50	48.1	40.4	15.0123
888500	19.4	44.6	44.6	36.2	14.5492
889000	24.2	45	45	38.0667	12.0089
889500	29.1	40.7	40.7	36.8333	6.69726
890000	28.8	50	50	42.9333	12.2398
890500	27.1	46.1	46.1	39.7667	10.9697
891000	28.4	48.5	48.5	41.8	11.6047
891500	19.3	43.9	43.9	35.7	14.2028
892000	15.9	41.3	41.3	32.8333	14.6647
892500	20.4	37.6	37.6	31.8667	9.93042
893000	20.7	38	36.4	31.7	9.55981
893500	22.5	43.5	43.5	36.5	12.1244
894000	30.4	49.8	49.8	43.3333	11.2006
894500	21.9	39.4	39.4	33.5667	10.1036
895000	17.2	39.7	39.7	32.2	12.9904
895500	27.1	44.4	44.4	38.6333	9.98816
896000	21.4	42.6	42.6	35.5333	12.2398
896500	25.1	46.7	44.6	38.8	11.9109
897000	23.3	46.3	44.4	38	12.766
897500	22.9	48.5	48.5	39.9667	14.7802
898000	20.2	47.8	47.8	38.6	15.9349
898500	27.9	41.8	39.8	36.5	7.51465
899000	22.4	44.1	44.1	36.8667	12.5285
899500	16.8	40.3	38.5	31.8667	13.0791
900000	16.8	33.6	33.6	28	9.69948
900500	23.1	37	37	32.3667	8.02517
901000	14.3	38.9	38.9	30.7	14.2028
901500	16.2	47.6	47.6	37.1333	18.1288
902000	17.1	43.9	43.9	34.9667	15.473
902500	25.3	49.8	49.8	41.6333	14.1451
903000	18	41.5	39.7	33.0667	13.0791
903500	27.2	47.6	47.6	40.8	11.7779
904000	25.9	48.1	48.1	40.7	12.8172
904500	20.6	43.3	43.3	35.7333	13.1059
905000	19.3	39.4	39.4	32.7	11.6047
905500	23.4	41	41	35.1333	10.1614
906000	22.6	41.3	41.3	35.0667	10.7965
906500	15.7	38.9	38.9	31.1667	13.3945
907000	17.4	41.3	39.4	32.7	13.2842
907500	21	45.2	45.2	37.1333	13.9719
908000	20.7	35.3	35.3	30.4333	8.42931
908500	28.1	42.2	42.2	37.5	8.14064
909000	24.6	36.1	36.1	32.2667	6.63953
909500	17.8	36.9	36.9	30.5333	11.0274
910000	25.4	40.8	40.8	35.6667	8.89119
910500	24.9	50.8	50.8	42.1667	14.9534
911000	15.6	46.9	45	35.8333	17.5483
911500	24	44.6	44.6	37.7333	11.8934
912000	30.8	48.3	48.3	42.4667	10.1036
912500	25.8	54.3	54.3	44.8	16.4545
913000	26.7	44.6	44.6	38.6333	10.3346
913500	20.9	47.2	47.2	38.4333	15.1843
914000	26.5	53.2	53.2	44.3	15.4153
914500	23.4	49.5	49.5	40.8	15.0688
915000	15.9	34.8	34.8	28.5	10.9119
915500	19	34.2	34.2	29.1333	8.77572
916000	28.6	47.8	47.8	41.4	11.0851
916500	22.9	42.7	40.8	35.4667	10.9244
917000	23.5	50.5	50.5	41.5	15.5885
917500	22.3	50.5	50.5	41.1	16.2813
918000	19.9	38.9	38.9	32.5667	10.9697
918500	15.3	36.9	36.9	29.7	12.4708
919000	23	46.1	46.1	38.4	13.3368
919500	31	55.9	55.9	47.6	14.376
920000	19.5	51.8	51.8	41.0333	18.6484
920500	8.3	44.1	42	31.4667	20.0904
921000	22.6	52.9	52.9	42.8	17.4937
921500	18.5	47.4	47.4	37.7667	16.6854
922000	24.3	43.1	41	36.1333	10.3016
922500	16.9	39.5	39.5	31.9667	13.0481
923000	25.1	49.5	49.5	41.3667	14.0873
923500	20	42	42	34.6667	12.7017
924000	28.3	51	51	43.4333	13.1059
924500	18.9	47.2	47.2	37.7667	16.339
925000	31.3	50	50	43.7667	10.7965
925500	22.6	49.5	49.5	40.5333	15.5307
926000	34	48.5	46.5	43	7.85812
926500	19.4	54.3	54.3	42.6667	20.1495
927000	18.4	53.2	53.2	41.6	20.0918
927500	28.7	47.8	47.8	41.4333	11.0274
928000	22.7	38	38	32.9	8.83346
928500	23.1	46.3	46.3	38.5667	13.3945
929000	25.4	41.3	41.3	36	9.17987
929500	17.6	29.4	27.5	24.8333	6.33588
930000	24.3	42.9	41	36.0667	10.2344
930500	23.9	47.4	45.5	38.9333	13.0539
931000	13.5	36.6	36.6	28.9	13.3368
931500	19.4	42.2	42.2	34.6	13.1636
932000	13.2	47.2	47.2	35.8667	19.6299
932500	18	49.3	49.3	38.8667	18.0711
933000	18.1	44.4	44.4	35.6333	15.1843
933500	16.7	40.8	40.8	32.7667	13.9141
934000	14.7	43.9	43.9	34.1667	16.8586
934500	19.5	49.5	47.6	38.8667	16.7989
935000	19.1	43.5	43.5	35.3667	14.0873
935500	25.5	41.8	41.8	36.3667	9.41081
936000	18.4	53.8	53.8	42	20.4382
936500	18.6	50	50	39.5333	18.1288
937000	19.6	37.6	37.6	31.6	10.3923
937500	24	41.2	41.2	35.4667	9.93042
938000	20.9	42.9	42.9	35.5667	12.7017
938500	20.6	46.3	46.3	37.7333	14.8379
939000	14.4	46.5	46.5	35.8	18.5329
939500	20.1	42	42	34.7	12.644
940000	24.3	41.3	41.3	35.6333	9.81495
940500	15.2	39.7	39.7	31.5333	14.1451
941000	14.1	31.5	31.5	25.7	10.0459
941500	22.5	39.4	39.4	33.7667	9.75722
942000	25.8	38.8	38.8	34.4667	7.50555
942500	15.3	34	34	27.7667	10.7965
943000	20.1	46.5	46.5	37.7	15.242
943500	30.2	46.3	46.3	40.9333	9.29534
944000	23.3	40.8	40.8	34.9667	10.1036
944500	30.3	48.8	48.8	42.6333	10.681
945000	20.9	41.8	41.8	34.8333	12.0666
945500	33.3	56.5	56.5	48.7667	13.3945
946000	32.5	44.6	44.6	40.5667	6.98594
946500	35.5	55.2	55.2	48.6333	11.3738
947000	30.1	50.3	50.3	43.5667	11.6625
947500	30.9	44.4	44.4	39.9	7.79423
948000	14.3	31.6	29.8	25.2333	9.51122
948500	19.5	41	41	33.8333	12.413
949000	12.7	41.2	41.2	31.7	16.4545
949500	18	48.3	48.3	38.2	17.4937
950000	17.2	45.9	45.9	36.3333	16.57
950500	25.1	55.2	55.2	45.1667	17.3782
951000	22.5	47.8	47.8	39.3667	14.607
951500	25.3	50.8	50.8	42.3	14.7224
952000	27.5	55.6	55.6	46.2333	16.2235
952500	16.4	42.6	42.6	33.8667	15.1266
953000	21.4	45.2	45.2	37.2667	13.7409
953500	23.3	40.3	40.3	34.6333	9.81495
954000	17	47.4	47.4	37.2667	17.5514
954500	33.8	52.6	52.6	46.3333	10.8542
955000	24.7	43.7	43.7	37.3667	10.9697
955500	21.4	40.8	40.8	34.3333	11.2006
956000	12.5	44.2	44.2	33.6333	18.302
956500	26.9	51.8	51.8	43.5	14.376
957000	19.8	61	59.2	46.6667	23.2846
957500	20.4	52.1	52.1	41.5333	18.302
958000	8.2	52.1	52.1	37.4667	25.3457
958500	14.2	49.8	49.8	37.9333	20.5537
959000	13.2	43.3	43.3	33.2667	17.3782
959500	23.2	49	49	40.4	14.8956
960000	15.2	49.5	49.5	38.0667	19.8031
960500	14.5	39.7	39.7	31.3	14.5492
961000	32.1	58.1	58.1	49.4333	15.0111
961500	17.3	49	49	38.4333	18.302
962000	19.2	52.6	52.6	41.4667	19.2835
962500	21.3	50.8	50.8	40.9667	17.0318
963000	14.5	46.3	46.3	35.7	18.3597
963500	32.7	46.3	46.3	41.7667	7.85196
964000	28.9	52.1	52.1	44.3667	13.3945
964500	27.5	55.2	55.2	45.9667	15.9926
965000	19.4	49.5	47.6	38.8333	16.8566
965500	23.3	40	38.2	33.8333	9.16642
966000	12.1	41.3	41.3	31.5667	16.8586
966500	22.2	42.9	42.9	36	11.9512
967000	29.5	46.5	46.5	40.8333	9.81495
967500	20.3	52.1	52.1	41.5	18.3597
968000	19	39.2	37.3	31.8333	11.1545
968500	13	39.7	39.7	30.8	15.4153
969000	20.4	44.6	44.6	36.5333	13.9719
969500	13.8	43.3	43.3	33.4667	17.0318
970000	26.2	51.3	51.3	42.9333	14.4915
970500	28.1	42.7	40.8	37.2	7.93788
971000	26.2	52.6	52.6	43.8	15.242
971500	21.9	65.4	65.4	50.9	25.1147
972000	17.2	41.5	41.5	33.4	14.0296
972500	19.8	46.7	46.7	37.7333	15.5307
973000	22.3	45.7	45.7	37.9	13.51
973500	22.8	47.4	47.4	39.2	14.2028
974000	26.7	41.7	39.7	36.0333	8.14453
974500	16.7	39.1	39.1	31.6333	12.9326
975000	24.3	42.9	42.9	36.7	10.7387
975500	22.2	40.7	40.7	34.5333	10.681
976000	29.6	46.5	46.5	40.8667	9.75722
976500	12.8	46.1	46.1	35	19.2258
977000	27.1	49	49	41.7	12.644
977500	31.9	49.3	49.3	43.5	10.0459
978000	30.5	52.1	52.1	44.9	12.4708
978500	27.1	43.3	43.3	37.9	9.35307
979000	12.6	38.3	38.3	29.7333	14.8379
979500	30.5	47.6	47.6	41.9	9.87269
980000	33.8	51.8	51.8	45.8	10.3923
980500	25.7	48.1	46.3	40.0333	12.4456
981000	24.2	48.5	48.5	40.4	14.0296
981500	23.4	51.5	51.5	42.1333	16.2235
982000	24.9	53.2	53.2	43.7667	16.339
982500	23.8	50.3	48.3	40.8	14.7564
983000	27.3	51.8	51.8	43.6333	14.1451
983500	22.9	48.1	48.1	39.7	14.5492
984000	17.1	43.1	43.1	34.4333	15.0111
984500	19.4	46.9	46.9	37.7333	15.8771
985000	23.8	44.8	44.8	37.8	12.1244
985500	18.3	45.9	45.9	36.7	15.9349
986000	23.4	48.8	48.8	40.3333	14.6647
986500	17.9	46.5	46.5	36.9667	16.5122
987000	23.6	45.5	45.5	38.2	12.644
987500	20	41.8	40	33.9333	12.1001
988000	28.1	49.5	49.5	42.3667	12.3553
988500	28.9	48.3	48.3	41.8333	11.2006
989000	24.3	42.9	42.9	36.7	10.7387
989500	30.7	42.2	42.2	38.3667	6.63953
990000	22.4	39.2	39.2	33.6	9.69948
990500	19.8	52.6	52.6	41.6667	18.9371
991000	27.5	50.8	50.8	43.0333	13.4523
991500	34.7	54.1	54.1	47.6333	11.2006
992000	31.3	33.2	33.2	32.5667	1.09697
992500	22.8	41.8	41.8	35.4667	10.9697
993000	14.6	33.8	33.8	27.4	11.0851
993500	26.4	46.9	46.9	40.0667	11.8357
994000	22.6	48.5	48.5	39.8667	14.9534
994500	24.2	50.3	50.3	41.6	15.0688
995000	22	46.5	46.5	38.3333	14.1451
995500	28.7	51.8	51.8	44.1	13.3368
996000	20.1	52.9	52.9	41.9667	18.9371
996500	31.1	47.6	47.6	42.1	9.52628
997000	25.4	46.7	46.7	39.6	12.2976
997500	28.7	52.6	52.6	44.6333	13.7987
998000	26.7	48.8	48.8	41.4333	12.7594
998500	35	48.5	48.5	44	7.79423
999000	19.6	41.8	41.8	34.4	12.8172
999500	24.9	42.2	42.2	36.4333	9.98816
1000000	19.6	43.1	43.1	35.2667	13.5677
1000500	16.4	38.5	38.5	31.1333	12.7594
1001000	15.7	38.3	38.3	30.7667	13.0481
1001500	30.9	49	49	42.9667	10.45
1002000	28.6	41	41	36.8667	7.15914
1002500	21.4	43.7	43.7	36.2667	12.8749

## Sheet: Butyl-3-hydroxy butyrate-pb3A
	GC-SSR responses to furaneol butyl 3-hydroxy butyrate
T[ms]	F[Hz]	F[Hz]	F[Hz]	Average	SD
150000	19.6	18	19.6	19.0667	0.92376
150500	17.2	17.2	17.2	17.2	0
151000	25.7	24.4	25.7	25.2667	0.750555
151500	32.7	31	32.7	32.1333	0.981495
152000	24.1	22.6	24.1	23.6	0.866025
152500	9.1	9.1	9.1	9.1	0
153000	19	17.4	19	18.4667	0.92376
153500	18.4	18.4	18.4	18.4	0
154000	26.2	24.6	26.2	25.6667	0.92376
154500	27.1	25.3	27.1	26.5	1.03923
155000	24.3	24.3	24.3	24.3	0
155500	11.7	11.7	11.7	11.7	2.17558e-15
156000	29	25	26.5	26.8333	2.02073
156500	20.9	17.4	17.4	18.5667	2.02073
157000	21.7	19.7	21.7	21.0333	1.1547
157500	20.7	19.3	20.7	20.2333	0.80829
158000	15.7	15.7	15.7	15.7	2.17558e-15
158500	23.9	23.9	23.9	23.9	4.35117e-15
159000	31.9	30.2	31.9	31.3333	0.981495
159500	25.5	20.7	23.9	23.3667	2.44404
160000	25.2	25.2	25.2	25.2	0
160500	28.9	21.7	28.9	26.5	4.15692
161000	24	20.5	24	22.8333	2.02073
161500	22.8	20.9	22.8	22.1667	1.09697
162000	24.3	22.6	24.3	23.7333	0.981495
162500	27.2	23.6	25.4	25.4	1.8
163000	23.5	23.5	23.5	23.5	0
163500	20.7	20.7	20.7	20.7	0
164000	28.2	24.4	26.3	26.3	1.9
164500	19.8	16.5	18.1	18.1333	1.65025
165000	20.3	20.3	20.3	20.3	0
165500	17.8	16.1	16.1	16.6667	0.981495
166000	23.4	21.8	21.8	22.3333	0.92376
166500	12.7	12.7	12.7	12.7	2.17558e-15
167000	16.9	16.9	16.9	16.9	0
167500	19.6	19.6	19.6	19.6	0
168000	32.2	30.4	32.2	31.6	1.03923
168500	18.6	18.6	18.6	18.6	0
169000	29.8	28	29.8	29.2	1.03923
169500	21.8	21.8	21.8	21.8	0
170000	28.7	25.1	28.7	27.5	2.07846
170500	23.3	23.3	23.3	23.3	0
171000	17.6	17.6	17.6	17.6	0
171500	22	22	22	22	0
172000	27.9	26.4	27.9	27.4	0.866025
172500	18.3	18.3	18.3	18.3	0
173000	22.4	22.4	22.4	22.4	4.35117e-15
173500	20.9	19.2	20.9	20.3333	0.981495
174000	13.9	13.9	13.9	13.9	0
174500	27.5	27.5	27.5	27.5	0
175000	19.7	19.7	19.7	19.7	0
175500	22	22	22	22	0
176000	21.6	21.6	21.6	21.6	4.35117e-15
176500	21.5	21.5	21.5	21.5	0
177000	20.2	20.2	20.2	20.2	0
177500	17.5	17.5	17.5	17.5	0
178000	23.6	23.6	23.6	23.6	4.35117e-15
178500	16.1	16.1	16.1	16.1	0
179000	27.9	24.4	27.9	26.7333	2.02073
179500	25.1	23.3	25.1	24.5	1.03923
180000	23.6	23.6	23.6	23.6	4.35117e-15
180500	25.4	23.5	25.4	24.7667	1.09697
181000	17.6	17.6	17.6	17.6	0
181500	13.8	13.8	13.8	13.8	2.17558e-15
182000	26.2	24.5	24.5	25.0667	0.981495
182500	29.2	29.2	29.2	29.2	0
183000	22.9	22.9	22.9	22.9	4.35117e-15
183500	23.6	18.9	23.6	22.0333	2.71355
184000	15.2	15.2	15.2	15.2	2.17558e-15
184500	27.5	27.5	27.5	27.5	0
185000	27.2	25.4	27.2	26.6	1.03923
185500	27.3	26.8	27.3	27.1333	0.288675
186000	17	17	17	17	0
186500	12.5	12.5	12.5	12.5	0
187000	29.2	27.5	29.2	28.6333	0.981495
187500	17.1	16.1	17.1	16.7667	0.57735
188000	13.5	13.5	13.5	13.5	0
188500	11.5	11.5	11.5	11.5	0
189000	24.3	24.3	24.3	24.3	0
189500	20.7	19.1	20.7	20.1667	0.92376
190000	26.9	23.9	26.9	25.9	1.73205
190500	14.9	14.6	14.9	14.8	0.173205
191000	18.8	17.2	17.2	17.7333	0.92376
191500	21	19.1	19.1	19.7333	1.09697
192000	15.3	13.7	15.3	14.7667	0.92376
192500	26.5	26.5	26.5	26.5	0
193000	15.8	15.8	15.8	15.8	2.17558e-15
193500	18.1	16.3	18.1	17.5	1.03923
194000	16.9	16.9	16.9	16.9	0
194500	14.1	14.1	14.1	14.1	0
195000	18.2	18.2	18.2	18.2	0
195500	24.3	24.3	24.3	24.3	0
196000	17.6	17.6	17.6	17.6	0
196500	27.1	24.1	27.1	26.1	1.73205
197000	13.1	13.1	13.1	13.1	0
197500	15.4	15.4	15.4	15.4	0
198000	19.6	16.1	17.9	17.8667	1.75024
198500	23.1	21.4	23.1	22.5333	0.981495
199000	25.8	25.4	25.8	25.6667	0.23094
199500	19	19	19	19	0
200000	21.2	21.2	21.2	21.2	0
200500	14.6	14.6	14.6	14.6	0
201000	31.5	28.3	31.5	30.4333	1.84752
201500	15.5	15.3	15.5	15.4333	0.11547
202000	21.3	21.3	21.3	21.3	0
202500	17.5	17.5	17.5	17.5	0
203000	24.3	23	23	23.4333	0.750555
203500	15.4	15.4	15.4	15.4	0
204000	19.4	19.4	19.4	19.4	0
204500	24.4	24.4	24.4	24.4	4.35117e-15
205000	19.3	17.5	19.3	18.7	1.03923
205500	21.8	18.5	21.8	20.7	1.90526
206000	25.1	25.1	25.1	25.1	4.35117e-15
206500	19	19	19	19	0
207000	15	15	15	15	0
207500	36.9	33.2	36.9	35.6667	2.1362
208000	22	22	22	22	0
208500	18	18	18	18	0
209000	19.1	19.1	19.1	19.1	0
209500	17.3	17.3	17.3	17.3	0
210000	23.8	22.1	23.8	23.2333	0.981495
210500	25.3	23.4	25.3	24.6667	1.09697
211000	18	18	18	18	0
211500	10.6	10.6	10.6	10.6	0
212000	17.5	17.5	17.5	17.5	0
212500	20.5	18.9	20.5	19.9667	0.92376
213000	22.3	20.4	20.4	21.0333	1.09697
213500	17.5	17.5	17.5	17.5	0
214000	24.9	23.1	23.1	23.7	1.03923
214500	26.6	26.6	26.6	26.6	4.35117e-15
215000	24.8	24.8	24.8	24.8	0
215500	27.2	23.4	23.4	24.6667	2.19393
216000	25.4	23.6	25.4	24.8	1.03923
216500	25.3	20.8	25.3	23.8	2.59808
217000	11.9	11.9	11.9	11.9	0
217500	16.4	15.2	16.4	16	0.69282
218000	14.5	14.5	14.5	14.5	0
218500	13.3	13.3	13.3	13.3	2.17558e-15
219000	27	21.6	27	25.2	3.11769
219500	15.6	14	14	14.5333	0.92376
220000	21.8	21.8	21.8	21.8	0
220500	19.1	15.9	19.1	18.0333	1.84752
221000	17.2	17.2	17.2	17.2	0
221500	15	15	15	15	0
222000	14.8	14.8	14.8	14.8	2.17558e-15
222500	24.8	21.5	24.8	23.7	1.90526
223000	23.6	23.2	23.6	23.4667	0.23094
223500	15.4	15.4	15.4	15.4	0
224000	13.5	13.5	13.5	13.5	0
224500	20.4	20.4	20.4	20.4	0
225000	15.9	15.9	15.9	15.9	0
225500	17.4	17.4	17.4	17.4	0
226000	16.7	16.7	16.7	16.7	0
226500	21.2	21.2	21.2	21.2	0
227000	24.4	22.6	22.6	23.2	1.03923
227500	20	19.7	19.7	19.8	0.173205
228000	18.7	18.7	18.7	18.7	0
228500	27.3	27.3	27.3	27.3	0
229000	19.2	17.4	19.2	18.6	1.03923
229500	17.6	15.8	15.8	16.4	1.03923
230000	19.8	16.2	19.8	18.6	2.07846
230500	24.3	24.3	24.3	24.3	0
231000	14.5	14.1	14.5	14.3667	0.23094
231500	21	19.4	21	20.4667	0.92376
232000	20.1	18.2	20.1	19.4667	1.09697
232500	18.7	18.7	18.7	18.7	0
233000	19.5	19.5	19.5	19.5	0
233500	13.8	13.8	13.8	13.8	2.17558e-15
234000	14.2	14.2	14.2	14.2	2.17558e-15
234500	21.1	16.6	21.1	19.6	2.59808
235000	12.9	11.1	12.9	12.3	1.03923
235500	17.3	13.8	17.3	16.1333	2.02073
236000	8.6	6.9	8.6	8.03333	0.981495
236500	15.4	15.4	15.4	15.4	0
237000	24.5	24.5	24.5	24.5	0
237500	17.2	17.2	17.2	17.2	0
238000	20	20	20	20	0
238500	19.1	19.1	19.1	19.1	0
239000	25.4	24	24	24.4667	0.80829
239500	19.9	19.9	19.9	19.9	0
240000	25.3	20.9	22.4	22.8667	2.23681
240500	17.8	17.8	17.8	17.8	0
241000	15.2	15.2	15.2	15.2	2.17558e-15
241500	16.4	14.6	14.6	15.2	1.03923
242000	16.6	16.6	16.6	16.6	0
242500	18.8	18.8	18.8	18.8	0
243000	22.8	22.8	22.8	22.8	0
243500	17.9	17.9	17.9	17.9	0
244000	12.6	12.6	12.6	12.6	0
244500	18.8	18.8	18.8	18.8	0
245000	22.3	22.3	22.3	22.3	0
245500	17.2	17.2	17.2	17.2	0
246000	20.7	20.7	20.7	20.7	0
246500	26.9	26.9	26.9	26.9	4.35117e-15
247000	19.7	19.7	19.7	19.7	0
247500	12.4	12.4	12.4	12.4	0
248000	21.9	21.9	21.9	21.9	4.35117e-15
248500	28.5	26.6	28.5	27.8667	1.09697
249000	18.9	18.9	18.9	18.9	0
249500	15.1	15.1	15.1	15.1	0
250000	27	27	27	27	0
250500	15.5	15.5	15.5	15.5	0
251000	16.4	14.6	16.4	15.8	1.03923
251500	15.3	15.3	15.3	15.3	2.17558e-15
252000	19.5	19.5	19.5	19.5	0
252500	30.7	30.7	30.7	30.7	0
253000	11.8	11.8	11.8	11.8	2.17558e-15
253500	16.6	16.6	16.6	16.6	0
254000	20.4	20.4	20.4	20.4	0
254500	30.8	26.9	30.8	29.5	2.25167
255000	22.9	22.9	22.9	22.9	4.35117e-15
255500	20.2	18.3	18.3	18.9333	1.09697
256000	23.8	23.8	23.8	23.8	0
256500	24	22.5	24	23.5	0.866025
257000	22.9	22.6	22.9	22.8	0.173205
257500	24.4	22.7	22.7	23.2667	0.981495
258000	17.3	15.7	15.7	16.2333	0.92376
258500	18.3	16.5	18.3	17.7	1.03923
259000	25.1	25.1	25.1	25.1	4.35117e-15
259500	17.5	17.5	17.5	17.5	0
260000	24.9	24.9	24.9	24.9	4.35117e-15
260500	16.6	15.2	15.2	15.6667	0.80829
261000	22	22	22	22	0
261500	22.5	22.5	22.5	22.5	0
262000	13	13	13	13	0
262500	22	22	22	22	0
263000	24.1	22.2	22.2	22.8333	1.09697
263500	18.1	18.1	18.1	18.1	0
264000	17.1	17.1	17.1	17.1	0
264500	31.3	31.3	31.3	31.3	0
265000	18.9	18.9	18.9	18.9	0
265500	19.5	19.5	19.5	19.5	0
266000	24.9	24.9	24.9	24.9	4.35117e-15
266500	19	17.1	17.1	17.7333	1.09697
267000	23.4	23.4	23.4	23.4	4.35117e-15
267500	19.8	19.8	19.8	19.8	0
268000	14.7	14.7	14.7	14.7	2.17558e-15
268500	23.3	20.2	20.2	21.2333	1.78979
269000	18.2	18.2	18.2	18.2	0
269500	29.9	29.9	29.9	29.9	4.35117e-15
270000	10.3	10.3	10.3	10.3	0
270500	21.1	19.6	21.1	20.6	0.866025
271000	25.9	25.9	25.9	25.9	4.35117e-15
271500	24.8	24.8	24.8	24.8	0
272000	18.6	18.6	18.6	18.6	0
272500	17.4	17.4	17.4	17.4	0
273000	16	16	16	16	0
273500	19.2	19.2	19.2	19.2	0
274000	19.5	19.5	19.5	19.5	0
274500	16.8	16.8	16.8	16.8	0
275000	19	17.3	17.3	17.8667	0.981495
275500	20	18.3	20	19.4333	0.981495
276000	20.4	20.4	20.4	20.4	0
276500	24.8	24.8	24.8	24.8	0
277000	19	19	19	19	0
277500	22	20.3	22	21.4333	0.981495
278000	23.8	22	23.8	23.2	1.03923
278500	18.6	18.6	18.6	18.6	0
279000	13.8	13.8	13.8	13.8	2.17558e-15
279500	21	21	21	21	0
280000	30.3	28.6	30.3	29.7333	0.981495
280500	14.7	14.7	14.7	14.7	2.17558e-15
281000	29.2	27.4	29.2	28.6	1.03923
281500	23.3	23.3	23.3	23.3	0
282000	24.2	23.3	23.3	23.6	0.519615
282500	25.8	22.1	23.9	23.9333	1.85023
283000	26.9	23	26.9	25.6	2.25167
283500	25.5	24	25.5	25	0.866025
284000	22.5	20	22.5	21.6667	1.44338
284500	18.8	18.1	18.8	18.5667	0.404145
285000	20.5	20.5	20.5	20.5	0
285500	17.5	16	16	16.5	0.866025
286000	12	12	12	12	0
286500	11.6	10.2	11.6	11.1333	0.80829
287000	23.6	21.6	23.6	22.9333	1.1547
287500	22.4	22.4	22.4	22.4	4.35117e-15
288000	17.6	15.9	17.6	17.0333	0.981495
288500	21.4	20.2	21.4	21	0.69282
289000	18.7	18.7	18.7	18.7	0
289500	29.9	29.9	29.9	29.9	4.35117e-15
290000	30.4	27.4	28.9	28.9	1.5
290500	18.3	16.5	16.5	17.1	1.03923
291000	31.7	31.7	31.7	31.7	0
291500	16.1	16.1	16.1	16.1	0
292000	30.1	30.1	30.1	30.1	4.35117e-15
292500	21.4	21.4	21.4	21.4	4.35117e-15
293000	16.6	14.9	16.6	16.0333	0.981495
293500	15.8	15.8	15.8	15.8	2.17558e-15
294000	22.8	21.3	21.3	21.8	0.866025
294500	26.2	24.5	24.5	25.0667	0.981495
295000	26.6	26.6	26.6	26.6	4.35117e-15
295500	11.2	11.2	11.2	11.2	2.17558e-15
296000	29.1	29.1	29.1	29.1	4.35117e-15
296500	19.5	19.5	19.5	19.5	0
297000	16.2	16.2	16.2	16.2	0
297500	20.2	20.2	20.2	20.2	0
298000	18.8	18.8	18.8	18.8	0
298500	15.8	15.8	15.8	15.8	2.17558e-15
299000	17.2	17.2	17.2	17.2	0
299500	27.7	27.7	27.7	27.7	0
300000	21.7	21.7	21.7	21.7	0
300500	23.9	22.2	23.9	23.3333	0.981495
301000	20.1	16.7	20.1	18.9667	1.96299
301500	19.9	19.9	19.9	19.9	0
302000	20.4	20.4	20.4	20.4	0
302500	13.9	13.9	13.9	13.9	0
303000	19.2	19.2	19.2	19.2	0
303500	27.3	27.3	27.3	27.3	0
304000	24.5	24.5	24.5	24.5	0
304500	14.9	14.9	14.9	14.9	0
305000	14.4	14.4	14.4	14.4	0
305500	23.7	23.7	23.7	23.7	0
306000	19.6	18.2	18.2	18.6667	0.80829
306500	20.7	19	19	19.5667	0.981495
307000	22.3	20.4	22.3	21.6667	1.09697
307500	22	20.3	20.3	20.8667	0.981495
308000	15.8	15.8	15.8	15.8	2.17558e-15
308500	12.7	12.7	12.7	12.7	2.17558e-15
309000	13	13	13	13	0
309500	27	27	27	27	0
310000	22.1	22.1	22.1	22.1	4.35117e-15
310500	17.5	17.5	17.5	17.5	0
311000	21.8	21.8	21.8	21.8	0
311500	34.8	32.2	34.8	33.9333	1.50111
312000	17.5	15.6	17.5	16.8667	1.09697
312500	16.3	16.3	16.3	16.3	0
313000	22.5	22.5	22.5	22.5	0
313500	21.1	21.1	21.1	21.1	0
314000	18.5	18.5	18.5	18.5	0
314500	17.6	17.6	17.6	17.6	0
315000	17.9	17.9	17.9	17.9	0
315500	17.5	17.5	17.5	17.5	0
316000	19.6	19.6	19.6	19.6	0
316500	33.1	33.1	33.1	33.1	0
317000	20.8	20.8	20.8	20.8	0
317500	25.1	23.1	23.1	23.7667	1.1547
318000	18.6	18.6	18.6	18.6	0
318500	28.2	26.4	28.2	27.6	1.03923
319000	16.9	16.9	16.9	16.9	0
319500	23.4	21.6	23.4	22.8	1.03923
320000	34.4	32.6	34.4	33.8	1.03923
320500	22.7	22.3	22.7	22.5667	0.23094
321000	12.7	12.7	12.7	12.7	2.17558e-15
321500	22.6	22.6	22.6	22.6	4.35117e-15
322000	21	21	21	21	0
322500	19.8	19.8	19.8	19.8	0
323000	20.6	20.6	20.6	20.6	0
323500	23.5	23.5	23.5	23.5	0
324000	20.1	18.2	20.1	19.4667	1.09697
324500	15.7	13.9	15.7	15.1	1.03923
325000	23.5	23.5	23.5	23.5	0
325500	16.2	16.2	16.2	16.2	0
326000	28.1	26.5	28.1	27.5667	0.92376
326500	17.8	17.8	17.8	17.8	0
327000	32.4	30.8	30.8	31.3333	0.92376
327500	23.3	23.3	23.3	23.3	0
328000	10.1	10.1	10.1	10.1	0
328500	16.8	16.8	16.8	16.8	0
329000	14.9	14.9	14.9	14.9	0
329500	27	27	27	27	0
330000	21.8	21.8	21.8	21.8	0
330500	19.3	19.3	19.3	19.3	0
331000	15.8	15.8	15.8	15.8	2.17558e-15
331500	14.8	14.8	14.8	14.8	2.17558e-15
332000	19.9	18.4	19.9	19.4	0.866025
332500	11.9	11.9	11.9	11.9	0
333000	19.5	19.5	19.5	19.5	0
333500	30.9	30.9	30.9	30.9	4.35117e-15
334000	23.2	23.2	23.2	23.2	0
334500	12.7	12.7	12.7	12.7	2.17558e-15
335000	19.8	19.8	19.8	19.8	0
335500	19.5	18.1	18.1	18.5667	0.80829
336000	16.3	16.3	16.3	16.3	0
336500	17.7	16.1	17.7	17.1667	0.92376
337000	18.9	18.9	18.9	18.9	0
337500	21.2	21.2	21.2	21.2	0
338000	18.8	18.8	18.8	18.8	0
338500	31.3	29.5	31.3	30.7	1.03923
339000	19.7	19.7	19.7	19.7	0
339500	27	24	24	25	1.73205
340000	11.6	11.6	11.6	11.6	0
340500	18	18	18	18	0
341000	17.4	16	17.4	16.9333	0.80829
341500	16.2	16.2	16.2	16.2	0
342000	16.6	16.6	16.6	16.6	0
342500	20.2	20.2	20.2	20.2	0
343000	20.2	16	16.9	17.7	2.21133
343500	12.8	11.2	12.8	12.2667	0.92376
344000	32.2	30.2	32.2	31.5333	1.1547
344500	31.9	26.3	28.2	28.8	2.84781
345000	16.8	16.8	16.8	16.8	0
345500	17.4	17.4	17.4	17.4	0
346000	15.6	15.6	15.6	15.6	0
346500	15.8	15.8	15.8	15.8	2.17558e-15
347000	20.2	20.2	20.2	20.2	0
347500	28.8	24.9	26.9	26.8667	1.95021
348000	26.2	26.2	26.2	26.2	0
348500	18.6	16.9	16.9	17.4667	0.981495
349000	27.7	25.8	27.4	26.9667	1.02144
349500	19.8	18.1	18.1	18.6667	0.981495
350000	21.8	21.8	21.8	21.8	0
350500	32.4	32.4	32.4	32.4	0
351000	21.2	19.4	19.4	20	1.03923
351500	15.2	15.2	15.2	15.2	2.17558e-15
352000	26.9	26.9	26.9	26.9	4.35117e-15
352500	19.3	19.3	19.3	19.3	0
353000	18.3	16.8	18.3	17.8	0.866025
353500	16.8	16.8	16.8	16.8	0
354000	27.5	24.1	25.8	25.8	1.7
354500	19.9	16.3	16.3	17.5	2.07846
355000	18.9	18.9	18.9	18.9	0
355500	22.8	22.8	22.8	22.8	0
356000	21.1	19.3	19.3	19.9	1.03923
356500	22.7	19.2	22.7	21.5333	2.02073
357000	18.1	18.1	18.1	18.1	0
357500	17.2	17.2	17.2	17.2	0
358000	21.8	20	21.8	21.2	1.03923
358500	21.6	21.6	21.6	21.6	4.35117e-15
359000	21.1	21.1	21.1	21.1	0
359500	23.3	23.3	23.3	23.3	0
360000	23.3	23.3	23.3	23.3	0
360500	29.1	27.2	29.1	28.4667	1.09697
361000	16.3	16.3	16.3	16.3	0
361500	26.4	24.8	26.4	25.8667	0.92376
362000	16.9	16.9	16.9	16.9	0
362500	20.2	20.2	20.2	20.2	0
363000	23.4	21.7	23.4	22.8333	0.981495
363500	17.5	16.1	16.1	16.5667	0.80829
364000	26.4	24.6	24.6	25.2	1.03923
364500	17.4	17	17	17.1333	0.23094
365000	26.4	20.7	26.4	24.5	3.2909
365500	16.9	13.9	16.9	15.9	1.73205
366000	14.1	14.1	14.1	14.1	0
366500	26.2	26.2	26.2	26.2	0
367000	24.3	24.3	24.3	24.3	0
367500	17.2	17.2	17.2	17.2	0
368000	24.9	21.1	24.9	23.6333	2.19393
368500	12.2	12.2	12.2	12.2	2.17558e-15
369000	15.3	15.3	15.3	15.3	2.17558e-15
369500	12.2	10.7	10.7	11.2	0.866025
370000	19.9	19.9	19.9	19.9	0
370500	17	15.3	17	16.4333	0.981495
371000	19.5	19.5	19.5	19.5	0
371500	22.1	22.1	22.1	22.1	4.35117e-15
372000	23.8	23.8	23.8	23.8	0
372500	31.4	29.5	29.5	30.1333	1.09697
373000	20.9	20.9	20.9	20.9	0
373500	20.2	20.2	20.2	20.2	0
374000	25.5	25.5	25.5	25.5	0
374500	29.9	25.8	27.9	27.8667	2.0502
375000	16.1	16.1	16.1	16.1	0
375500	20.7	18.9	18.9	19.5	1.03923
376000	26.9	23.5	26.9	25.7667	1.96299
376500	23.3	21.5	23.3	22.7	1.03923
377000	14.7	14.7	14.7	14.7	2.17558e-15
377500	26.8	26.8	26.8	26.8	0
378000	24.6	24.6	24.6	24.6	4.35117e-15
378500	13.6	13.6	13.6	13.6	0
379000	27.7	27.7	27.7	27.7	0
379500	16.9	16.9	16.9	16.9	0
380000	19.3	17.7	19.3	18.7667	0.92376
380500	15.9	15.9	15.9	15.9	0
381000	15.2	13.5	15.2	14.6333	0.981495
381500	17.5	14.5	17.5	16.5	1.73205
382000	17.4	16.1	17.4	16.9667	0.750555
382500	13.7	13.7	13.7	13.7	2.17558e-15
383000	18.5	18.5	18.5	18.5	0
383500	16.6	15	16.6	16.0667	0.92376
384000	18.6	18.6	18.6	18.6	0
384500	19	16.1	19	18.0333	1.67432
385000	10.5	10.5	10.5	10.5	0
385500	19.3	19.3	19.3	19.3	0
386000	21.4	21.4	21.4	21.4	4.35117e-15
386500	26.2	26.2	26.2	26.2	0
387000	18.7	17.1	18.7	18.1667	0.92376
387500	19.1	19.1	19.1	19.1	0
388000	17.2	17.2	17.2	17.2	0
388500	15.5	15.5	15.5	15.5	0
389000	18.3	18.3	18.3	18.3	0
389500	17	17	17	17	0
390000	20	20	20	20	0
390500	33.2	31.2	33.2	32.5333	1.1547
391000	16.7	13.4	16.7	15.6	1.90526
391500	23.4	21.7	23.4	22.8333	0.981495
392000	16.6	16.6	16.6	16.6	0
392500	24.3	20.8	24.3	23.1333	2.02073
393000	15.5	15.3	15.5	15.4333	0.11547
393500	22.2	20.4	22.2	21.6	1.03923
394000	18.2	18.2	18.2	18.2	0
394500	19.8	19.8	19.8	19.8	0
395000	22.7	22.7	22.7	22.7	0
395500	20.3	20.3	20.3	20.3	0
396000	14.1	14.1	14.1	14.1	0
396500	24.9	24.9	24.9	24.9	4.35117e-15
397000	21.8	21.8	21.8	21.8	0
397500	19	19	19	19	0
398000	20	20	20	20	0
398500	24.8	22.9	24.8	24.1667	1.09697
399000	24.2	24.2	24.2	24.2	0
399500	20.1	20.1	20.1	20.1	0
400000	13.9	13.9	13.9	13.9	0
400500	18.6	18.6	18.6	18.6	0
401000	24.6	24.6	24.6	24.6	4.35117e-15
401500	9.8	9.8	9.8	9.8	0
402000	16.7	16.7	16.7	16.7	0
402500	21.3	21.3	21.3	21.3	0
403000	22.2	22.2	22.2	22.2	0
403500	24.3	22.5	22.5	23.1	1.03923
404000	24	20.8	22.4	22.4	1.6
404500	19.6	18.7	19.3	19.2	0.458258
405000	17.7	17.7	17.7	17.7	0
405500	24.3	22.4	22.4	23.0333	1.09697
406000	21.6	21.6	21.6	21.6	4.35117e-15
406500	19.3	19.3	19.3	19.3	0
407000	14.7	14.7	14.7	14.7	2.17558e-15
407500	13.1	13.1	13.1	13.1	0
408000	27.3	27.3	27.3	27.3	0
408500	11.7	11.7	11.7	11.7	2.17558e-15
409000	29.6	27.9	27.9	28.4667	0.981495
409500	19.5	19.5	19.5	19.5	0
410000	23.9	23.9	23.9	23.9	4.35117e-15
410500	25.2	25.2	25.2	25.2	0
411000	15.1	15.1	15.1	15.1	0
411500	20.6	20.6	20.6	20.6	0
412000	14.5	14.5	14.5	14.5	0
412500	30	30	30	30	0
413000	23.9	23.9	23.9	23.9	4.35117e-15
413500	16.7	16.7	16.7	16.7	0
414000	28.8	28.8	28.8	28.8	0
414500	26.4	26.4	26.4	26.4	4.35117e-15
415000	27.6	27.6	27.6	27.6	4.35117e-15
415500	13.1	13.1	13.1	13.1	0
416000	15.5	15.5	15.5	15.5	0
416500	22.1	22.1	22.1	22.1	4.35117e-15
417000	28.3	26.4	28.3	27.6667	1.09697
417500	29.2	27.5	29.2	28.6333	0.981495
418000	18.5	18.5	18.5	18.5	0
418500	22.1	21.6	21.6	21.7667	0.288675
419000	15.9	14.1	14.1	14.7	1.03923
419500	10.6	10.6	10.6	10.6	0
420000	21.2	21.2	21.2	21.2	0
420500	27.9	27.9	27.9	27.9	4.35117e-15
421000	21	21	21	21	0
421500	18	18	18	18	0
422000	14.1	14.1	14.1	14.1	0
422500	24.4	24.4	24.4	24.4	4.35117e-15
423000	13.3	13.3	13.3	13.3	2.17558e-15
423500	23.7	22.4	22.4	22.8333	0.750555
424000	20.8	20.8	20.8	20.8	0
424500	19.3	17.4	17.4	18.0333	1.09697
425000	21.1	21.1	21.1	21.1	0
425500	18	16.4	16.4	16.9333	0.92376
426000	20.2	19.7	19.7	19.8667	0.288675
426500	19.3	17.6	17.6	18.1667	0.981495
427000	20.2	19.7	19.7	19.8667	0.288675
427500	20.3	20.3	20.3	20.3	0
428000	17.1	14.2	17.1	16.1333	1.67432
428500	19.3	19.3	19.3	19.3	0
429000	19.5	19.5	19.5	19.5	0
429500	37.5	37.5	37.5	37.5	0
430000	23.3	23.3	23.3	23.3	0
430500	19.1	19.1	19.1	19.1	0
431000	21.9	21.9	21.9	21.9	4.35117e-15
431500	20.6	20.6	20.6	20.6	0
432000	28	26.1	28	27.3667	1.09697
432500	16.2	16.2	16.2	16.2	0
433000	14.2	14.2	14.2	14.2	2.17558e-15
433500	31.3	29.6	31.3	30.7333	0.981495
434000	23.2	21.5	23.2	22.6333	0.981495
434500	22.5	20.6	22.5	21.8667	1.09697
435000	33	33	33	33	0
435500	17.8	17.8	17.8	17.8	0
436000	24.9	24.9	24.9	24.9	4.35117e-15
436500	22.9	21.3	21.3	21.8333	0.92376
437000	13.3	13.3	13.3	13.3	2.17558e-15
437500	18.9	18.9	18.9	18.9	0
438000	29.2	29.2	29.2	29.2	0
438500	25.2	21.3	25.2	23.9	2.25167
439000	19.3	19.3	19.3	19.3	0
439500	17	17	17	17	0
440000	7.7	7.7	7.7	7.7	0
440500	22	20.8	20.8	21.2	0.69282
441000	19.1	19.1	19.1	19.1	0
441500	21.2	21.2	21.2	21.2	0
442000	23.9	23.9	23.9	23.9	4.35117e-15
442500	17.4	17.4	17.4	17.4	0
443000	16.8	16.8	16.8	16.8	0
443500	22.9	22.9	22.9	22.9	4.35117e-15
444000	15	15	15	15	0
444500	16.5	16.5	16.5	16.5	0
445000	30.9	27	27	28.3	2.25167
445500	15.1	15.1	15.1	15.1	0
446000	20.4	20	20	20.1333	0.23094
446500	27.2	25.3	25.3	25.9333	1.09697
447000	21.6	21.6	21.6	21.6	4.35117e-15
447500	16.4	16.4	16.4	16.4	0
448000	23.9	23.9	23.9	23.9	4.35117e-15
448500	18.9	18.9	18.9	18.9	0
449000	24.2	24.2	24.2	24.2	0
449500	33.6	33.6	33.6	33.6	0
450000	33.6	33.6	33.6	33.6	0
450500	46.1	36	44.2	42.1	5.36749
451000	44.8	43.1	44.8	44.2333	0.981495
451500	31.1	29.2	29.2	29.8333	1.09697
452000	27	25.4	27	26.4667	0.92376
452500	23	21.3	21.3	21.8667	0.981495
453000	16.7	16.7	16.7	16.7	0
453500	16.9	16.9	16.9	16.9	0
454000	21.2	21.2	21.2	21.2	0
454500	17.1	17.1	17.1	17.1	0
455000	26.2	26.2	26.2	26.2	0
455500	25.1	25.1	25.1	25.1	4.35117e-15
456000	18.3	16.8	18.3	17.8	0.866025
456500	14.6	14.6	14.6	14.6	0
457000	16	16	16	16	0
457500	26.7	26.7	26.7	26.7	0
458000	23.4	23.4	23.4	23.4	4.35117e-15
458500	15.3	15.3	15.3	15.3	2.17558e-15
459000	14.3	14.3	14.3	14.3	2.17558e-15
459500	22.9	22.9	22.9	22.9	4.35117e-15
460000	19.8	19.8	19.8	19.8	0
460500	20.4	20.4	20.4	20.4	0
461000	19.2	19.2	19.2	19.2	0
461500	30.3	30.3	30.3	30.3	0
462000	19.5	16.3	17.9	17.9	1.6
462500	20.8	20.5	20.8	20.7	0.173205
463000	18.1	18.1	18.1	18.1	0
463500	17.1	17.1	17.1	17.1	0
464000	19.6	19.6	19.6	19.6	0
464500	20.7	20.7	20.7	20.7	0
465000	15.1	15.1	15.1	15.1	0
465500	22.5	22.5	22.5	22.5	0
466000	26.2	24.5	26.2	25.6333	0.981495
466500	12.7	12.7	12.7	12.7	2.17558e-15
467000	26.3	26.3	26.3	26.3	0
467500	15.3	15.3	15.3	15.3	2.17558e-15
468000	24.4	24.4	24.4	24.4	4.35117e-15
468500	18.3	18.3	18.3	18.3	0
469000	22.4	22.4	22.4	22.4	4.35117e-15
469500	13	13	13	13	0
470000	32.9	32.9	32.9	32.9	0
470500	24.3	21.7	21.7	22.5667	1.50111
471000	16.8	15.1	15.1	15.6667	0.981495
471500	14	14	14	14	0
472000	14.3	14.3	14.3	14.3	2.17558e-15
472500	30.2	30.2	30.2	30.2	0
473000	18.8	18.8	18.8	18.8	0
473500	26.8	24.9	26.8	26.1667	1.09697
474000	24.3	24.3	24.3	24.3	0
474500	24.3	24.3	24.3	24.3	0
475000	36.2	36.2	36.2	36.2	0
475500	21.6	21.6	21.6	21.6	4.35117e-15
476000	18.5	18.5	18.5	18.5	0
476500	13.3	13.3	13.3	13.3	2.17558e-15
477000	18	16.4	16.4	16.9333	0.92376
477500	15.1	15.1	15.1	15.1	0
478000	26.4	26.4	26.4	26.4	4.35117e-15
478500	27.8	27.8	27.8	27.8	0
479000	38	38	38	38	0
479500	25.3	23.3	23.3	23.9667	1.1547
480000	23.4	23.4	23.4	23.4	4.35117e-15
480500	29.3	29.3	29.3	29.3	0
481000	26	26	26	26	0
481500	19.7	17.8	17.8	18.4333	1.09697
482000	20.1	20.1	20.1	20.1	0
482500	23	23	23	23	0
483000	15.1	15.1	15.1	15.1	0
483500	27.4	27.4	27.4	27.4	4.35117e-15
484000	20.8	20.8	20.8	20.8	0
484500	21.1	21.1	21.1	21.1	0
485000	19.8	19.8	19.8	19.8	0
485500	16.9	16.9	16.9	16.9	0
486000	27	27	27	27	0
486500	23.1	23.1	23.1	23.1	4.35117e-15
487000	23.1	23.1	23.1	23.1	4.35117e-15
487500	16.5	16.5	16.5	16.5	0
488000	15.6	15.6	15.6	15.6	0
488500	26.3	26.3	26.3	26.3	0
489000	23.5	23.5	23.5	23.5	0
489500	12.1	12.1	12.1	12.1	0
490000	25.3	25.3	25.3	25.3	0
490500	20.2	20.2	20.2	20.2	0
491000	17.1	17.1	17.1	17.1	0
491500	17	17	17	17	0
492000	18.7	18.7	18.7	18.7	0
492500	15.8	15.8	15.8	15.8	2.17558e-15
493000	18.3	16.5	16.5	17.1	1.03923
493500	29.2	29.1	29.1	29.1333	0.057735
494000	25.5	25.5	25.5	25.5	0
494500	27.1	27.1	27.1	27.1	4.35117e-15
495000	24.1	24.1	24.1	24.1	4.35117e-15
495500	11.6	11.6	11.6	11.6	0
496000	20	20	20	20	0
496500	20.3	20.3	20.3	20.3	0
497000	18.1	16.5	16.5	17.0333	0.92376
497500	22.5	21.5	21.5	21.8333	0.57735
498000	24	24	24	24	0
498500	19	19	19	19	0
499000	20.6	20.6	20.6	20.6	0
499500	19.1	19.1	19.1	19.1	0
500000	15	15	15	15	0
500500	17.1	17.1	17.1	17.1	0
501000	21.3	21.3	21.3	21.3	0
501500	17.8	17.8	17.8	17.8	0
502000	19.4	19.4	19.4	19.4	0
502500	17.8	17.8	17.8	17.8	0
503000	22.9	22.9	22.9	22.9	4.35117e-15
503500	23.3	21.7	23.3	22.7667	0.92376
504000	28.2	26.6	28.2	27.6667	0.92376
504500	12.3	12.3	12.3	12.3	2.17558e-15
505000	20.2	20.2	20.2	20.2	0
505500	22.4	22.4	22.4	22.4	4.35117e-15
506000	19.7	19.7	19.7	19.7	0
506500	22.1	22.1	22.1	22.1	4.35117e-15
507000	22.1	22.1	22.1	22.1	4.35117e-15
507500	24	24	24	24	0
508000	27.4	27.4	27.4	27.4	4.35117e-15
508500	25.1	22.3	23.7	23.7	1.4
509000	23.7	23.7	23.7	23.7	0
509500	23	23	23	23	0
510000	17.9	17.9	17.9	17.9	0
510500	28	28	28	28	0
511000	31.1	29.2	31.1	30.4667	1.09697
511500	24.8	24.8	24.8	24.8	0
512000	33.4	33.4	33.4	33.4	0
512500	18.5	18.5	18.5	18.5	0
513000	25.8	23.9	23.9	24.5333	1.09697
513500	18.8	18.8	18.8	18.8	0
514000	27.5	27.5	27.5	27.5	0
514500	28.2	27.2	28.2	27.8667	0.57735
515000	23.5	21.5	23.5	22.8333	1.1547
515500	29.3	27.7	27.7	28.2333	0.92376
516000	14.5	14.5	14.5	14.5	0
516500	16.4	16.4	16.4	16.4	0
517000	19.5	19.5	19.5	19.5	0
517500	15.9	15.9	15.9	15.9	0
518000	11.4	11.4	11.4	11.4	0
518500	18.9	18.9	18.9	18.9	0
519000	31.5	29.5	31.5	30.8333	1.1547
519500	15.9	15.9	15.9	15.9	0
520000	23.4	23.4	23.4	23.4	4.35117e-15
520500	20	20	20	20	0
521000	26.9	26.9	26.9	26.9	4.35117e-15
521500	23.7	23.7	23.7	23.7	0
522000	28.7	28.7	28.7	28.7	0
522500	20	20	20	20	0
523000	19.5	19.5	19.5	19.5	0
523500	21.2	17.6	19.4	19.4	1.8
524000	26.7	25.1	25.1	25.6333	0.92376
524500	15.1	15.1	15.1	15.1	0
525000	20.4	20.4	20.4	20.4	0
525500	27.5	27.5	27.5	27.5	0
526000	34.6	34.6	34.6	34.6	0
526500	20.9	20.9	20.9	20.9	0
527000	22.7	21	21	21.5667	0.981495
527500	37.3	37.3	37.3	37.3	0
528000	14.1	14.1	14.1	14.1	0
528500	12	12	12	12	0
529000	24.2	22.4	24.2	23.6	1.03923
529500	18.9	18.9	18.9	18.9	0
530000	23.9	23.9	23.9	23.9	4.35117e-15
530500	28.6	26.7	26.7	27.3333	1.09697
531000	21.7	21.7	21.7	21.7	0
531500	20.8	20.8	20.8	20.8	0
532000	23.5	23.5	23.5	23.5	0
532500	18	18	18	18	0
533000	20.4	20.4	20.4	20.4	0
533500	23.5	23.5	23.5	23.5	0
534000	24.4	24.4	24.4	24.4	4.35117e-15
534500	22.5	22.5	22.5	22.5	0
535000	16.9	16.9	16.9	16.9	0
535500	22.4	22.4	22.4	22.4	4.35117e-15
536000	17.2	17.2	17.2	17.2	0
536500	31.3	31.3	31.3	31.3	0
537000	21.5	21.5	21.5	21.5	0
537500	26.1	26.1	26.1	26.1	4.35117e-15
538000	23.9	22.1	22.1	22.7	1.03923
538500	19.6	19.6	19.6	19.6	0
539000	26.8	26.8	26.8	26.8	0
539500	17.6	17.6	17.6	17.6	0
540000	25	25	25	25	0
540500	19.9	19.9	19.9	19.9	0
541000	26.3	26.3	26.3	26.3	0
541500	22.9	22.9	22.9	22.9	4.35117e-15
542000	13.9	13.9	13.9	13.9	0
542500	19.3	19.3	19.3	19.3	0
543000	23.7	21.7	23.7	23.0333	1.1547
543500	23.9	22.3	23.9	23.3667	0.92376
544000	21.7	21.7	21.7	21.7	0
544500	17	17	17	17	0
545000	16.6	16.6	16.6	16.6	0
545500	34	34	34	34	0
546000	17.8	17.8	17.8	17.8	0
546500	27	25.3	25.3	25.8667	0.981495
547000	24.2	24.2	24.2	24.2	0
547500	30.1	28.3	28.3	28.9	1.03923
548000	17.1	17.1	17.1	17.1	0
548500	18.8	18.8	18.8	18.8	0
549000	26.2	24.8	26.2	25.7333	0.80829
549500	16.8	15.1	16.8	16.2333	0.981495
550000	15.4	15.4	15.4	15.4	0
550500	14.6	14.6	14.6	14.6	0
551000	21.4	20	21.4	20.9333	0.80829
551500	23.5	23.5	23.5	23.5	0
552000	19.2	19.2	19.2	19.2	0
552500	18.9	18.9	18.9	18.9	0
553000	10.6	10.6	10.6	10.6	0
553500	17.6	16.2	16.2	16.6667	0.80829
554000	20	20	20	20	0
554500	20.9	20.9	20.9	20.9	0
555000	20.1	18.4	20.1	19.5333	0.981495
555500	15.5	15.5	15.5	15.5	0
556000	17.4	17.4	17.4	17.4	0
556500	12.8	12.8	12.8	12.8	2.17558e-15
557000	16.4	16.4	16.4	16.4	0
557500	19.4	18	18	18.4667	0.80829
558000	24	24	24	24	0
558500	20.5	20.5	20.5	20.5	0
559000	21.3	21.3	21.3	21.3	0
559500	24	22.4	22.4	22.9333	0.92376
560000	33.8	32.2	32.2	32.7333	0.92376
560500	16.2	14.4	14.4	15	1.03923
561000	15.6	15.6	15.6	15.6	0
561500	27.2	27.2	27.2	27.2	0
562000	22.5	22.5	22.5	22.5	0
562500	32.5	32.5	32.5	32.5	0
563000	19.8	19.8	19.8	19.8	0
563500	18.6	18.6	18.6	18.6	0
564000	20	18.2	18.2	18.8	1.03923
564500	21.1	21.1	21.1	21.1	0
565000	41	41	41	41	0
565500	28	28	28	28	0
566000	19.2	19.2	19.2	19.2	0
566500	25.4	25.4	25.4	25.4	4.35117e-15
567000	17.3	17.3	17.3	17.3	0
567500	16.9	16.9	16.9	16.9	0
568000	22.9	21.1	22.9	22.3	1.03923
568500	25.7	25.7	25.7	25.7	0
569000	25.5	25.5	25.5	25.5	0
569500	28.7	26.7	26.7	27.3667	1.1547
570000	19.8	19.8	19.8	19.8	0
570500	26.2	26.2	26.2	26.2	0
571000	18.3	18.3	18.3	18.3	0
571500	23.9	23.9	23.9	23.9	4.35117e-15
572000	26.3	26.3	26.3	26.3	0
572500	16.1	16.1	16.1	16.1	0
573000	26.1	26.1	26.1	26.1	4.35117e-15
573500	23.6	23.6	23.6	23.6	4.35117e-15
574000	12.9	12.9	12.9	12.9	0
574500	23.7	23.7	23.7	23.7	0
575000	17.2	17.2	17.2	17.2	0
575500	21.3	21.3	21.3	21.3	0
576000	17.5	17.5	17.5	17.5	0
576500	17.1	17.1	17.1	17.1	0
577000	25.4	23.8	25.4	24.8667	0.92376
577500	14.1	14.1	14.1	14.1	0
578000	22.1	22.1	22.1	22.1	4.35117e-15
578500	18	18	18	18	0
579000	19.7	19.7	19.7	19.7	0
579500	25.5	25.5	25.5	25.5	0
580000	17.7	17.7	17.7	17.7	0
580500	12.2	12.2	12.2	12.2	2.17558e-15
581000	16.5	16.5	16.5	16.5	0
581500	22.3	22.3	22.3	22.3	0
582000	24.3	24.3	24.3	24.3	0
582500	24.6	24.6	24.6	24.6	4.35117e-15
583000	31.3	31.3	31.3	31.3	0
583500	30.3	30.3	30.3	30.3	0
584000	20.5	20.5	20.5	20.5	0
584500	19.2	19.2	19.2	19.2	0
585000	23.1	23.1	23.1	23.1	4.35117e-15
585500	20.7	20.7	20.7	20.7	0
586000	20.4	18.7	18.7	19.2667	0.981495
586500	22.4	22.4	22.4	22.4	4.35117e-15
587000	23.5	23.5	23.5	23.5	0
587500	15	15	15	15	0
588000	23.1	23.1	23.1	23.1	4.35117e-15
588500	24.1	24.1	24.1	24.1	4.35117e-15
589000	19.5	19.5	19.5	19.5	0
589500	32.9	27.7	31.2	30.6	2.65141
590000	11.4	11.4	11.4	11.4	0
590500	15.5	15.5	15.5	15.5	0
591000	25	25	25	25	0
591500	19.4	19.4	19.4	19.4	0
592000	11.6	11.6	11.6	11.6	0
592500	19	19	19	19	0
593000	21.1	21.1	21.1	21.1	0
593500	22	22	22	22	0
594000	20.7	20.7	20.7	20.7	0
594500	16	16	16	16	0
595000	31.2	29.3	29.3	29.9333	1.09697
595500	27.2	27.2	27.2	27.2	0
596000	17.2	15.5	15.5	16.0667	0.981495
596500	21.1	21.1	21.1	21.1	0
597000	21	21	21	21	0
597500	16.8	16.8	16.8	16.8	0
598000	26.7	24.8	26.7	26.0667	1.09697
598500	20	20	20	20	0
599000	22.7	22.7	22.7	22.7	0
599500	27	27	27	27	0
600000	29.4	29.4	29.4	29.4	4.35117e-15
600500	29.6	27.8	29.6	29	1.03923
601000	16.3	16.3	16.3	16.3	0
601500	31.8	31.8	31.8	31.8	0
602000	18.7	17.1	17.1	17.6333	0.92376
602500	24.9	24.9	24.9	24.9	4.35117e-15
603000	24.2	24.2	24.2	24.2	0
603500	25.6	25.6	25.6	25.6	4.35117e-15
604000	27	27	27	27	0
604500	14.6	14.6	14.6	14.6	0
605000	23.5	23.5	23.5	23.5	0
605500	18.7	18.7	18.7	18.7	0
606000	21.3	19.7	19.7	20.2333	0.92376
606500	34.4	30.5	34.4	33.1	2.25167
607000	23.1	23.1	23.1	23.1	4.35117e-15
607500	24.8	24.8	24.8	24.8	0
608000	25.9	25.9	25.9	25.9	4.35117e-15
608500	30.8	30.8	30.8	30.8	0
609000	27.3	27.3	27.3	27.3	0
609500	24.9	24.9	24.9	24.9	4.35117e-15
610000	28.7	28.7	28.7	28.7	0
610500	16.3	16.3	16.3	16.3	0
611000	34.4	32.5	32.5	33.1333	1.09697
611500	23.1	23.1	23.1	23.1	4.35117e-15
612000	21	21	21	21	0
612500	23.5	23.5	23.5	23.5	0
613000	24.9	24.9	24.9	24.9	4.35117e-15
613500	27.2	27.2	27.2	27.2	0
614000	23.5	23.5	23.5	23.5	0
614500	21.4	21.4	21.4	21.4	4.35117e-15
615000	16.9	15.4	15.4	15.9	0.866025
615500	31.1	31.1	31.1	31.1	4.35117e-15
616000	13.9	13.9	13.9	13.9	0
616500	25.2	25.2	25.2	25.2	0
617000	19.7	19.7	19.7	19.7	0
617500	18.8	17.4	18.8	18.3333	0.80829
618000	16.3	14.5	14.5	15.1	1.03923
618500	25.2	23.6	23.6	24.1333	0.92376
619000	26.5	26.5	26.5	26.5	0
619500	23	23	23	23	0
620000	22.8	22.8	22.8	22.8	0
620500	19.3	17.7	19.3	18.7667	0.92376
621000	21.5	21.5	21.5	21.5	0
621500	15.6	14	15.6	15.0667	0.92376
622000	26.7	24.9	24.9	25.5	1.03923
622500	22.7	21.3	21.3	21.7667	0.80829
623000	20	19.7	19.7	19.8	0.173205
623500	26.7	24.8	26.7	26.0667	1.09697
624000	32.2	30.4	30.4	31	1.03923
624500	15.3	15.3	15.3	15.3	2.17558e-15
625000	17.1	15.4	17.1	16.5333	0.981495
625500	21.4	20	21.4	20.9333	0.80829
626000	28.5	28.5	28.5	28.5	0
626500	19.3	19.3	19.3	19.3	0
627000	19.2	19.2	19.2	19.2	0
627500	15.5	15.5	15.5	15.5	0
628000	14.2	14.2	14.2	14.2	2.17558e-15
628500	13.5	13.5	13.5	13.5	0
629000	27.2	27.2	27.2	27.2	0
629500	20.2	19.4	20.2	19.9333	0.46188
630000	23.1	21.1	23.1	22.4333	1.1547
630500	19.5	16	19.5	18.3333	2.02073
631000	19.7	19.7	19.7	19.7	0
631500	37.2	33.4	35.3	35.3	1.9
632000	30.1	30.1	30.1	30.1	4.35117e-15
632500	10.1	10.1	10.1	10.1	0
633000	16.1	14.3	14.3	14.9	1.03923
633500	18.6	18.6	18.6	18.6	0
634000	25.1	25.1	25.1	25.1	4.35117e-15
634500	27.2	27.2	27.2	27.2	0
635000	25.3	25.3	25.3	25.3	0
635500	18.2	18.2	18.2	18.2	0
636000	29.1	27.3	29.1	28.5	1.03923
636500	25.1	25.1	25.1	25.1	4.35117e-15
637000	13.5	13.5	13.5	13.5	0
637500	25	25	25	25	0
638000	19.2	19.2	19.2	19.2	0
638500	15.6	15.6	15.6	15.6	0
639000	24.9	24.9	24.9	24.9	4.35117e-15
639500	19.9	19.9	19.9	19.9	0
640000	21.2	21.2	21.2	21.2	0
640500	27	27	27	27	0
641000	24.4	22.8	22.8	23.3333	0.92376
641500	19	19	19	19	0
642000	32.2	32.2	32.2	32.2	0
642500	19.5	19.5	19.5	19.5	0
643000	22.1	22.1	22.1	22.1	4.35117e-15
643500	22.5	22.5	22.5	22.5	0
644000	22.4	22.4	22.4	22.4	4.35117e-15
644500	23.9	23.9	23.9	23.9	4.35117e-15
645000	22.5	22.5	22.5	22.5	0
645500	23.3	23.3	23.3	23.3	0
646000	26.5	23	24.8	24.7667	1.75024
646500	18.7	18.7	18.7	18.7	0
647000	27.4	27.4	27.4	27.4	4.35117e-15
647500	26.5	26.5	26.5	26.5	0
648000	22.4	22.4	22.4	22.4	4.35117e-15
648500	31.3	31.3	31.3	31.3	0
649000	27.8	27.8	27.8	27.8	0
649500	26	26	26	26	0
650000	20.2	20.2	20.2	20.2	0
650500	33.8	33.8	33.8	33.8	0
651000	19	19	19	19	0
651500	28.2	24.9	28.2	27.1	1.90526
652000	16.8	16.8	16.8	16.8	0
652500	22.9	22.9	22.9	22.9	4.35117e-15
653000	22	22	22	22	0
653500	30.2	28.6	28.6	29.1333	0.92376
654000	11.9	11.9	11.9	11.9	0
654500	21.7	21.7	21.7	21.7	0
655000	24.9	24.9	24.9	24.9	4.35117e-15
655500	21.4	21.4	21.4	21.4	4.35117e-15
656000	31.1	31.1	31.1	31.1	4.35117e-15
656500	27.5	27.5	27.5	27.5	0
657000	24.3	24.3	24.3	24.3	0
657500	22	22	22	22	0
658000	18.7	18.7	18.7	18.7	0
658500	15.3	15.3	15.3	15.3	2.17558e-15
659000	15.6	15.6	15.6	15.6	0
659500	21.1	21.1	21.1	21.1	0
660000	27.9	27.9	27.9	27.9	4.35117e-15
660500	31.2	31.2	31.2	31.2	0
661000	22.6	22.6	22.6	22.6	4.35117e-15
661500	19.9	19.9	19.9	19.9	0
662000	19.3	19.3	19.3	19.3	0
662500	29.4	29.4	29.4	29.4	4.35117e-15
663000	28.5	26.7	28.5	27.9	1.03923
663500	26.5	26.5	26.5	26.5	0
664000	26.6	23	24.8	24.8	1.8
664500	23.1	21.3	21.3	21.9	1.03923
665000	24.8	24.8	24.8	24.8	0
665500	19.3	19.3	19.3	19.3	0
666000	16.1	16.1	16.1	16.1	0
666500	18.7	18.7	18.7	18.7	0
667000	20.1	20.1	20.1	20.1	0
667500	31	29	31	30.3333	1.1547
668000	14.9	14.9	14.9	14.9	0
668500	17.9	17.9	17.9	17.9	0
669000	21.6	21.6	21.6	21.6	4.35117e-15
669500	23.4	23.4	23.4	23.4	4.35117e-15
670000	36.6	34.8	36.6	36	1.03923
670500	19	18.8	19	18.9333	0.11547
671000	23.8	21.9	23.8	23.1667	1.09697
671500	26.1	26.1	26.1	26.1	4.35117e-15
672000	30.4	28.7	30.4	29.8333	0.981495
672500	21.1	19.2	21.1	20.4667	1.09697
673000	19	19	19	19	0
673500	19.6	19.6	19.6	19.6	0
674000	17.8	17.8	17.8	17.8	0
674500	19.7	19.7	19.7	19.7	0
675000	19.5	19.5	19.5	19.5	0
675500	12.6	12.6	12.6	12.6	0
676000	31.4	29.9	31.4	30.9	0.866025
676500	16.6	16.6	16.6	16.6	0
677000	20.6	20.6	20.6	20.6	0
677500	24	24	24	24	0
678000	31.2	29.3	31.2	30.5667	1.09697
678500	23.1	21.5	23.1	22.5667	0.92376
679000	21.6	21.6	21.6	21.6	4.35117e-15
679500	25.6	25.6	25.6	25.6	4.35117e-15
680000	29	27.2	27.2	27.8	1.03923
680500	31.1	25.9	31.1	29.3667	3.00222
681000	23.5	21.5	21.5	22.1667	1.1547
681500	15.2	15.1	15.1	15.1333	0.057735
682000	18.7	18.7	18.7	18.7	0
682500	21.9	21.9	21.9	21.9	4.35117e-15
683000	20.7	19	20.7	20.1333	0.981495
683500	17	17	17	17	0
684000	19.9	18.1	19.9	19.3	1.03923
684500	15.3	15.3	15.3	15.3	2.17558e-15
685000	24.5	21	24.5	23.3333	2.02073
685500	29.8	27.9	28.2	28.6333	1.02144
686000	18.3	18.3	18.3	18.3	0
686500	24.4	22.8	24.4	23.8667	0.92376
687000	17.1	17.1	17.1	17.1	0
687500	17.5	17.5	17.5	17.5	0
688000	19.7	19.7	19.7	19.7	0
688500	24.3	24.3	24.3	24.3	0
689000	24.2	22.6	24.2	23.6667	0.92376
689500	13.7	11.7	13.7	13.0333	1.1547
690000	26.9	23.3	25.1	25.1	1.8
690500	14.8	14.8	14.8	14.8	2.17558e-15
691000	23.8	23.8	23.8	23.8	0
691500	19.1	17.5	19.1	18.5667	0.92376
692000	15.5	15.5	15.5	15.5	0
692500	27.8	27.8	27.8	27.8	0
693000	38.6	34.7	36.6	36.6333	1.95021
693500	34.6	31.3	34.6	33.5	1.90526
694000	17.8	14.2	17.8	16.6	2.07846
694500	14.6	14.6	14.6	14.6	0
695000	26.1	26.1	26.1	26.1	4.35117e-15
695500	22.1	22.1	22.1	22.1	4.35117e-15
696000	19.3	19.3	19.3	19.3	0
696500	26.9	26.9	26.9	26.9	4.35117e-15
697000	25.5	25.5	25.5	25.5	0
697500	20.4	17	18.7	18.7	1.7
698000	21.2	21.2	21.2	21.2	0
698500	28.2	28.2	28.2	28.2	0
699000	27.9	27.9	27.9	27.9	4.35117e-15
699500	22	22	22	22	0
700000	21	21	21	21	0
700500	30.6	28.9	28.9	29.4667	0.981495
701000	25.2	25.2	25.2	25.2	0
701500	31.1	27.2	27.2	28.5	2.25167
702000	26.3	26.3	26.3	26.3	0
702500	19.9	19.9	19.9	19.9	0
703000	27.9	27.9	27.9	27.9	4.35117e-15
703500	16.9	16.9	16.9	16.9	0
704000	17.5	17.5	17.5	17.5	0
704500	16.8	16.8	16.8	16.8	0
705000	25.6	25.6	25.6	25.6	4.35117e-15
705500	18.1	18.1	18.1	18.1	0
706000	15.9	15.9	15.9	15.9	0
706500	22.4	20.5	22.4	21.7667	1.09697
707000	26	26	26	26	0
707500	18.3	18.3	18.3	18.3	0
708000	27.7	27.7	27.7	27.7	0
708500	20.4	18.9	20.4	19.9	0.866025
709000	15.4	15.4	15.4	15.4	0
709500	24.2	24.2	24.2	24.2	0
710000	21.2	21.2	21.2	21.2	0
710500	16.7	16.7	16.7	16.7	0
711000	20.3	20.3	20.3	20.3	0
711500	26.4	26.4	26.4	26.4	4.35117e-15
712000	26.1	22.4	22.4	23.6333	2.1362
712500	17.8	17.8	17.8	17.8	0
713000	23.2	23.2	23.2	23.2	0
713500	24	24	24	24	0
714000	20	20	20	20	0
714500	21.2	21.2	21.2	21.2	0
715000	25.6	21.9	21.9	23.1333	2.1362
715500	33.2	29.9	31.5	31.5333	1.65025
716000	28.1	28.1	28.1	28.1	4.35117e-15
716500	18.2	18.2	18.2	18.2	0
717000	19.6	19.6	19.6	19.6	0
717500	31.1	27.8	31.1	30	1.90526
718000	22.9	22.9	22.9	22.9	4.35117e-15
718500	21	19	21	20.3333	1.1547
719000	22.2	22.2	22.2	22.2	0
719500	31.4	31.4	31.4	31.4	4.35117e-15
720000	28.5	28.5	28.5	28.5	0
720500	22	22	22	22	0
721000	31.7	29.9	31.7	31.1	1.03923
721500	20	20	20	20	0
722000	23.2	23.2	23.2	23.2	0
722500	17.4	17.4	17.4	17.4	0
723000	14.5	14.5	14.5	14.5	0
723500	17.8	17.8	17.8	17.8	0
724000	16.6	16.6	16.6	16.6	0
724500	17.5	17.5	17.5	17.5	0
725000	17.5	16.2	16.2	16.6333	0.750555
725500	17	17	17	17	0
726000	25.6	25.6	25.6	25.6	4.35117e-15
726500	16.8	16.8	16.8	16.8	0
727000	20.3	20.3	20.3	20.3	0
727500	12.9	12.9	12.9	12.9	0
728000	25.4	25.1	25.4	25.3	0.173205
728500	21.3	19.6	21.3	20.7333	0.981495
729000	32.1	30.2	30.2	30.8333	1.09697
729500	14.9	14.9	14.9	14.9	0
730000	15.3	15.3	15.3	15.3	2.17558e-15
730500	19	19	19	19	0
731000	19	19	19	19	0
731500	25.2	25.2	25.2	25.2	0
732000	19.5	19.5	19.5	19.5	0
732500	18.9	17	18.9	18.2667	1.09697
733000	20.3	18.6	20.3	19.7333	0.981495
733500	22.5	22.5	22.5	22.5	0
734000	28.9	27	28.9	28.2667	1.09697
734500	25.1	25.1	25.1	25.1	4.35117e-15
735000	22.4	22.4	22.4	22.4	4.35117e-15
735500	30.7	30.7	30.7	30.7	0
736000	28.4	28.4	28.4	28.4	4.35117e-15
736500	29.3	29.3	29.3	29.3	0
737000	17.5	17.5	17.5	17.5	0
737500	21.2	21.2	21.2	21.2	0
738000	28.8	28.8	28.8	28.8	0
738500	17.1	17.1	17.1	17.1	0
739000	29.2	27.6	27.6	28.1333	0.92376
739500	24	24	24	24	0
740000	31	29.2	31	30.4	1.03923
740500	21.7	21.7	21.7	21.7	0
741000	25.1	25.1	25.1	25.1	4.35117e-15
741500	32.5	32.5	32.5	32.5	0
742000	17.7	15.9	17.7	17.1	1.03923
742500	19.2	17.3	19.2	18.5667	1.09697
743000	23.6	21.9	23.6	23.0333	0.981495
743500	33.8	31.9	31.9	32.5333	1.09697
744000	30.5	27.1	27.1	28.2333	1.96299
744500	23.2	23.2	23.2	23.2	0
745000	19.6	19.6	19.6	19.6	0
745500	17	17	17	17	0
746000	19.9	19.9	19.9	19.9	0
746500	26.6	26.6	26.6	26.6	4.35117e-15
747000	22.1	22.1	22.1	22.1	4.35117e-15
747500	30.5	30.5	30.5	30.5	0
748000	17.1	17.1	17.1	17.1	0
748500	42.9	42.9	42.9	42.9	0
749000	20.7	20.7	20.7	20.7	0
749500	20.9	19.3	19.3	19.8333	0.92376
750000	25.1	23.4	23.4	23.9667	0.981495
750500	38.3	34.8	34.8	35.9667	2.02073
751000	28.1	28.1	28.1	28.1	4.35117e-15
751500	24.9	24.9	24.9	24.9	4.35117e-15
752000	30.9	29.3	30.9	30.3667	0.92376
752500	22	22	22	22	0
753000	26.9	26.9	26.9	26.9	4.35117e-15
753500	29.2	29.2	29.2	29.2	0
754000	19.5	19.5	19.5	19.5	0
754500	24.8	24.8	24.8	24.8	0
755000	28.2	28.2	28.2	28.2	0
755500	14.5	14.5	14.5	14.5	0
756000	19	17.4	19	18.4667	0.92376
756500	21.5	21.5	21.5	21.5	0
757000	26.2	26.2	26.2	26.2	0
757500	23.4	23.4	23.4	23.4	4.35117e-15
758000	23.2	23.2	23.2	23.2	0
758500	19.8	19.8	19.8	19.8	0
759000	23.6	23.6	23.6	23.6	4.35117e-15
759500	19.4	19.4	19.4	19.4	0
760000	22.4	22.4	22.4	22.4	4.35117e-15
760500	18.7	18.7	18.7	18.7	0
761000	18.3	16.7	18.3	17.7667	0.92376
761500	19.8	19.7	19.8	19.7667	0.057735
762000	26.5	26.5	26.5	26.5	0
762500	13.6	13.6	13.6	13.6	0
763000	26	26	26	26	0
763500	15.8	15.8	15.8	15.8	2.17558e-15
764000	15.9	14.3	15.9	15.3667	0.92376
764500	16.4	15.9	16.4	16.2333	0.288675
765000	23.7	23.7	23.7	23.7	0
765500	18.9	18.9	18.9	18.9	0
766000	21.9	21.9	21.9	21.9	4.35117e-15
766500	24.7	24.7	24.7	24.7	0
767000	22.3	22.3	22.3	22.3	0
767500	18.8	18.8	18.8	18.8	0
768000	18	18	18	18	0
768500	16.4	16.4	16.4	16.4	0
769000	34.5	34.5	34.5	34.5	0
769500	38.6	38.6	38.6	38.6	0
770000	18.7	18.7	18.7	18.7	0
770500	22	22	22	22	0
771000	25.7	25.7	25.7	25.7	0
771500	21.8	21.8	21.8	21.8	0
772000	26.6	26.6	26.6	26.6	4.35117e-15
772500	26	26	26	26	0
773000	16.5	16.5	16.5	16.5	0
773500	25	25	25	25	0
774000	24.6	24.6	24.6	24.6	4.35117e-15
774500	26.2	26.2	26.2	26.2	0
775000	17.2	15.5	15.5	16.0667	0.981495
775500	19.3	19.1	19.1	19.1667	0.11547
776000	26.2	26.2	26.2	26.2	0
776500	14.2	14.2	14.2	14.2	2.17558e-15
777000	27.6	27.6	27.6	27.6	4.35117e-15
777500	19.2	19.2	19.2	19.2	0
778000	23.7	23.7	23.7	23.7	0
778500	15.3	15.3	15.3	15.3	2.17558e-15
779000	30.1	30.1	30.1	30.1	4.35117e-15
779500	26	26	26	26	0
780000	17.1	17.1	17.1	17.1	0
780500	26.7	25.3	26.7	26.2333	0.80829
781000	23.2	21.2	23.2	22.5333	1.1547
781500	26.7	26.7	26.7	26.7	0
782000	27.9	26.2	26.2	26.7667	0.981495
782500	24.3	24.3	24.3	24.3	0
783000	24.7	24.7	24.7	24.7	0
783500	18.7	18.7	18.7	18.7	0
784000	20.2	20.2	20.2	20.2	0
784500	26.2	24.3	26.2	25.5667	1.09697
785000	23	23	23	23	0
785500	16	16	16	16	0
786000	23.3	23.3	23.3	23.3	0
786500	31.3	29.3	31.3	30.6333	1.1547
787000	29.6	27.6	29.6	28.9333	1.1547
787500	18.9	18.9	18.9	18.9	0
788000	21.4	21.4	21.4	21.4	4.35117e-15
788500	32.5	30.8	30.8	31.3667	0.981495
789000	14.4	14.4	14.4	14.4	0
789500	23.5	21.7	23.5	22.9	1.03923
790000	38	36.2	38	37.4	1.03923
790500	29.5	29.5	29.5	29.5	0
791000	23.2	20.1	21.7	21.6667	1.55027
791500	17.6	17.6	17.6	17.6	0
792000	21.1	21.1	21.1	21.1	0
792500	28.8	28.8	28.8	28.8	0
793000	27.4	27.4	27.4	27.4	4.35117e-15
793500	18.3	18.3	18.3	18.3	0
794000	19.3	19.3	19.3	19.3	0
794500	15.9	15.9	15.9	15.9	0
795000	20	20	20	20	0
795500	15.6	15.6	15.6	15.6	0
796000	25.7	25.7	25.7	25.7	0
796500	16.4	16.4	16.4	16.4	0
797000	28.6	26.8	26.8	27.4	1.03923
797500	18	18	18	18	0
798000	19.5	19.5	19.5	19.5	0
798500	27	27	27	27	0
799000	29.7	29.7	29.7	29.7	0
799500	25.5	25.5	25.5	25.5	0
800000	17.8	16.6	17.8	17.4	0.69282
800500	9.6	9.6	9.6	9.6	0
801000	22.4	20.8	20.8	21.3333	0.92376
801500	22.9	22.9	22.9	22.9	4.35117e-15
802000	27.6	27.6	27.6	27.6	4.35117e-15
802500	27	27	27	27	0
803000	21.6	21.6	21.6	21.6	4.35117e-15
803500	22.9	22.9	22.9	22.9	4.35117e-15
804000	22.7	22.7	22.7	22.7	0
804500	20.9	20.9	20.9	20.9	0
805000	30	26.3	28.2	28.1667	1.85023
805500	21.1	21.1	21.1	21.1	0
806000	25.1	25.1	25.1	25.1	4.35117e-15
806500	25.6	23.8	23.8	24.4	1.03923
807000	27.2	26.6	26.6	26.8	0.34641
807500	28.7	27.1	27.1	27.6333	0.92376
808000	18.7	18.7	18.7	18.7	0
808500	21.2	21.2	21.2	21.2	0
809000	23.7	23.7	23.7	23.7	0
809500	17.6	17.6	17.6	17.6	0
810000	17.8	17.8	17.8	17.8	0
810500	22.3	22.3	22.3	22.3	0
811000	30.9	30.9	30.9	30.9	4.35117e-15
811500	19.3	19.3	19.3	19.3	0
812000	34.4	34.4	34.4	34.4	0
812500	21.5	19.6	21.5	20.8667	1.09697
813000	28.6	28.6	28.6	28.6	4.35117e-15
813500	28.3	28.3	28.3	28.3	0
814000	33.1	33.1	33.1	33.1	0
814500	23.6	22	23.6	23.0667	0.92376
815000	30.7	28.9	28.9	29.5	1.03923
815500	26	26	26	26	0
816000	17.5	17.5	17.5	17.5	0
816500	18.8	18.8	18.8	18.8	0
817000	16.2	16.2	16.2	16.2	0
817500	17.3	17.3	17.3	17.3	0
818000	29.4	25.5	27.5	27.4667	1.95021
818500	26.5	26.5	26.5	26.5	0
819000	18.6	18.6	18.6	18.6	0
819500	14.9	14.9	14.9	14.9	0
820000	15	15	15	15	0
820500	22.1	22.1	22.1	22.1	4.35117e-15
821000	28.2	28.2	28.2	28.2	0
821500	17.3	17.3	17.3	17.3	0
822000	20.1	18.4	18.4	18.9667	0.981495
822500	27.8	27.8	27.8	27.8	0
823000	19.1	19.1	19.1	19.1	0
823500	24.9	24.9	24.9	24.9	4.35117e-15
824000	23.5	23.5	23.5	23.5	0
824500	22.1	22.1	22.1	22.1	4.35117e-15
825000	20.8	20.8	20.8	20.8	0
825500	23.2	23.2	23.2	23.2	0
826000	17.3	17.3	17.3	17.3	0
826500	24.7	24.7	24.7	24.7	0
827000	23.7	23.7	23.7	23.7	0
827500	32.7	31.1	32.7	32.1667	0.92376
828000	15.9	15.9	15.9	15.9	0
828500	22.4	21.1	21.1	21.5333	0.750555
829000	19	19	19	19	0
829500	24.1	24.1	24.1	24.1	4.35117e-15
830000	19.3	19.3	19.3	19.3	0
830500	29.5	29.5	29.5	29.5	0
831000	33.9	33.9	33.9	33.9	0
831500	15.1	15.1	15.1	15.1	0
832000	22.7	22.7	22.7	22.7	0
832500	16.4	16.4	16.4	16.4	0
833000	15.9	15.9	15.9	15.9	0
833500	19.1	19.1	19.1	19.1	0
834000	18.1	18.1	18.1	18.1	0
834500	24.8	24.8	24.8	24.8	0
835000	17.4	17.4	17.4	17.4	0
835500	18.2	18.2	18.2	18.2	0
836000	26.2	26.2	26.2	26.2	0
836500	13.8	13.8	13.8	13.8	2.17558e-15
837000	17.5	17.5	17.5	17.5	0
837500	23.9	23.9	23.9	23.9	4.35117e-15
838000	37.2	37.2	37.2	37.2	0
838500	27	27	27	27	0
839000	13.8	13.8	13.8	13.8	2.17558e-15
839500	32.2	32.2	32.2	32.2	0
840000	37.2	33.3	37.2	35.9	2.25167
840500	33.4	30.2	33.4	32.3333	1.84752
841000	20.7	20.7	20.7	20.7	0
841500	33.6	33.6	33.6	33.6	0
842000	26.5	24.6	24.6	25.2333	1.09697
842500	28.2	28.2	28.2	28.2	0
843000	28.2	28.2	28.2	28.2	0
843500	17	17	17	17	0
844000	17.2	17.2	17.2	17.2	0
844500	33.1	31.3	33.1	32.5	1.03923
845000	16	16	16	16	0
845500	16.8	16.8	16.8	16.8	0
846000	17.3	17.3	17.3	17.3	0
846500	20.5	20.5	20.5	20.5	0
847000	28.4	26.5	26.5	27.1333	1.09697
847500	12.4	12.4	12.4	12.4	0
848000	16.2	16.2	16.2	16.2	0
848500	22.8	22.8	22.8	22.8	0
849000	18.8	18.8	18.8	18.8	0
849500	23.4	23.4	23.4	23.4	4.35117e-15
850000	27.8	25.9	25.9	26.5333	1.09697
850500	15.8	15.8	15.8	15.8	2.17558e-15
851000	28.2	28.2	28.2	28.2	0
851500	17.2	17.2	17.2	17.2	0
852000	18.4	18.4	18.4	18.4	0
852500	16.2	16.2	16.2	16.2	0
853000	26.7	24.9	26.7	26.1	1.03923
853500	26.6	26.6	26.6	26.6	4.35117e-15
854000	21.3	21.3	21.3	21.3	0
854500	18.1	18.1	18.1	18.1	0
855000	23.2	21.3	23.2	22.5667	1.09697
855500	24.9	24.9	24.9	24.9	4.35117e-15
856000	17.9	17.9	17.9	17.9	0
856500	19.8	19.8	19.8	19.8	0
857000	20	20	20	20	0
857500	22.5	22.5	22.5	22.5	0
858000	22.9	22.9	22.9	22.9	4.35117e-15
858500	36.1	36.1	36.1	36.1	0
859000	24	22.1	22.1	22.7333	1.09697
859500	31.6	29.2	31.2	30.6667	1.28582
860000	37	31.1	35.2	34.4333	3.02379
860500	29.6	29.6	29.6	29.6	4.35117e-15
861000	30.2	30.2	30.2	30.2	0
861500	30.4	30.4	30.4	30.4	4.35117e-15
862000	26.8	26.8	26.8	26.8	0
862500	29.3	25.8	29.3	28.1333	2.02073
863000	27.4	27.4	27.4	27.4	4.35117e-15
863500	28.2	28.2	28.2	28.2	0
864000	20.1	20.1	20.1	20.1	0
864500	32.6	32.6	32.6	32.6	0
865000	22.1	18.9	22.1	21.0333	1.84752
865500	21.3	21.3	21.3	21.3	0
866000	21.9	21.9	21.9	21.9	4.35117e-15
866500	32.5	32.5	32.5	32.5	0
867000	20.5	20.5	20.5	20.5	0
867500	16.9	16.9	16.9	16.9	0
868000	19.6	17.6	19.6	18.9333	1.1547
868500	21	19.1	21	20.3667	1.09697
869000	26.5	26.5	26.5	26.5	0
869500	27	27	27	27	0
870000	21.1	21.1	21.1	21.1	0
870500	22.6	22.6	22.6	22.6	4.35117e-15
871000	19.1	19.1	19.1	19.1	0
871500	22.3	22.3	22.3	22.3	0
872000	25.6	22	25.6	24.4	2.07846
872500	19.1	19.1	19.1	19.1	0
873000	20	18.4	20	19.4667	0.92376
873500	22.6	22.6	22.6	22.6	4.35117e-15
874000	32.7	32.7	32.7	32.7	0
874500	25	25	25	25	0
875000	20	20	20	20	0
875500	29.6	27.9	29.6	29.0333	0.981495
876000	21.7	21.7	21.7	21.7	0
876500	23.6	23.6	23.6	23.6	4.35117e-15
877000	17.4	17.4	17.4	17.4	0
877500	20	18.3	18.3	18.8667	0.981495
878000	20.8	20.8	20.8	20.8	0
878500	20.1	18.4	20.1	19.5333	0.981495
879000	24.5	24.5	24.5	24.5	0
879500	36.6	36.6	36.6	36.6	0
880000	20.6	20.6	20.6	20.6	0
880500	27.9	26.2	26.2	26.7667	0.981495
881000	24.3	24.3	24.3	24.3	0
881500	17.8	17.8	17.8	17.8	0
882000	28.6	28.6	28.6	28.6	4.35117e-15
882500	21.2	21.2	21.2	21.2	0
883000	24.8	24.8	24.8	24.8	0
883500	31.4	31.4	31.4	31.4	4.35117e-15
884000	30	30	30	30	0
884500	27.6	27.6	27.6	27.6	4.35117e-15
885000	26.9	23	24.9	24.9333	1.95021
885500	30.2	26.6	28.4	28.4	1.8
886000	34.7	32.9	32.9	33.5	1.03923
886500	23.4	23.4	23.4	23.4	4.35117e-15
887000	31.4	31.4	31.4	31.4	4.35117e-15
887500	25	25	25	25	0
888000	34.8	34.8	34.8	34.8	0
888500	32.8	31.1	31.1	31.6667	0.981495
889000	19.7	19.7	19.7	19.7	0
889500	27.8	26	26	26.6	1.03923
890000	28.9	27	27	27.6333	1.09697
890500	29.9	29.6	29.6	29.7	0.173205
891000	26.5	26.5	26.5	26.5	0
891500	29.8	29.8	29.8	29.8	0
892000	16.9	16.9	16.9	16.9	0
892500	26.5	25.1	26.5	26.0333	0.80829
893000	22.3	22.3	22.3	22.3	0
893500	18.3	18.3	18.3	18.3	0
894000	30.1	30.1	30.1	30.1	4.35117e-15
894500	27.3	27.3	27.3	27.3	0
895000	36.4	34.6	36.4	35.8	1.03923
895500	26	26	26	26	0
896000	32.2	30.3	30.3	30.9333	1.09697
896500	27.4	27.4	27.4	27.4	4.35117e-15
897000	22.2	22.2	22.2	22.2	0
897500	28.2	28.2	28.2	28.2	0
898000	24	24	24	24	0
898500	16.8	16.8	16.8	16.8	0
899000	15.7	15.7	15.7	15.7	2.17558e-15
899500	21.5	21.5	21.5	21.5	0
900000	27.5	27.5	27.5	27.5	0
900500	20	20	20	20	0
901000	25.3	23.4	25.3	24.6667	1.09697
901500	22.7	21	22.7	22.1333	0.981495
902000	14.7	14.1	14.7	14.5	0.34641
902500	21.9	21.9	21.9	21.9	4.35117e-15
903000	24.6	24.6	24.6	24.6	4.35117e-15
903500	18.3	18.3	18.3	18.3	0
904000	14	14	14	14	0
904500	23.8	22.1	23.8	23.2333	0.981495
905000	34	34	34	34	0
905500	26	26	26	26	0
906000	25.9	25.9	25.9	25.9	4.35117e-15
906500	34.6	34.6	34.6	34.6	0
907000	23.7	23.7	23.7	23.7	0
907500	19.9	19.9	19.9	19.9	0
908000	24.9	24.9	24.9	24.9	4.35117e-15
908500	29.2	29.2	29.2	29.2	0
909000	23.4	23.4	23.4	23.4	4.35117e-15
909500	27.8	26	26	26.6	1.03923
910000	29.4	29.4	29.4	29.4	4.35117e-15
910500	30.8	30.8	30.8	30.8	0
911000	19.2	17.3	17.3	17.9333	1.09697
911500	26.4	26.4	26.4	26.4	4.35117e-15
912000	21.6	21.6	21.6	21.6	4.35117e-15
912500	21.1	21.1	21.1	21.1	0
913000	24.8	24.8	24.8	24.8	0
913500	24.4	24.4	24.4	24.4	4.35117e-15
914000	29.3	29.3	29.3	29.3	0
914500	15.8	14.1	14.1	14.6667	0.981495
915000	23.9	23.9	23.9	23.9	4.35117e-15
915500	24	24	24	24	0
916000	23.2	23.2	23.2	23.2	0
916500	24.9	24.9	24.9	24.9	4.35117e-15
917000	19.8	19.8	19.8	19.8	0
917500	28.1	28.1	28.1	28.1	4.35117e-15
918000	28	26.4	26.4	26.9333	0.92376
918500	19	19	19	19	0
919000	24.9	23.1	23.1	23.7	1.03923
919500	32.3	30.3	30.3	30.9667	1.1547
920000	17.7	17.7	17.7	17.7	0
920500	14.9	14.9	14.9	14.9	0
921000	22.4	22.4	22.4	22.4	4.35117e-15
921500	26.2	26.2	26.2	26.2	0
922000	24.3	24.3	24.3	24.3	0
922500	29.6	27.8	29.6	29	1.03923
923000	36.1	33.6	34.5	34.7333	1.26623
923500	18.7	18.7	18.7	18.7	0
924000	28.1	28.1	28.1	28.1	4.35117e-15
924500	16.5	16.5	16.5	16.5	0
925000	21.6	21.6	21.6	21.6	4.35117e-15
925500	31.7	31.7	31.7	31.7	0
926000	24.8	24.8	24.8	24.8	0
926500	24.3	24.3	24.3	24.3	0
927000	26	24.4	26	25.4667	0.92376
927500	26	26	26	26	0
928000	15.6	13.6	13.6	14.2667	1.1547
928500	26.3	26.2	26.2	26.2333	0.057735
929000	27.2	27.2	27.2	27.2	0
929500	21.8	21.8	21.8	21.8	0
930000	22.2	22.2	22.2	22.2	0
930500	18.8	18.8	18.8	18.8	0
931000	10.1	10.1	10.1	10.1	0
931500	17.4	17.4	17.4	17.4	0
932000	25.3	25.3	25.3	25.3	0
932500	19.9	19.9	19.9	19.9	0
933000	26.5	26.5	26.5	26.5	0
933500	28.9	28.9	28.9	28.9	4.35117e-15
934000	15.8	14.2	14.2	14.7333	0.92376
934500	19.9	18.1	18.1	18.7	1.03923
935000	12.4	12.4	12.4	12.4	0
935500	20.5	20.5	20.5	20.5	0
936000	22.5	22.5	22.5	22.5	0
936500	31.5	31.5	31.5	31.5	0
937000	22.1	22.1	22.1	22.1	4.35117e-15
937500	21.9	21.9	21.9	21.9	4.35117e-15
938000	23.8	23.8	23.8	23.8	0
938500	23.7	23.7	23.7	23.7	0
939000	23.1	23.1	23.1	23.1	4.35117e-15
939500	15.5	15.5	15.5	15.5	0
940000	20.2	20.2	20.2	20.2	0
940500	33.2	33.2	33.2	33.2	0
941000	15.1	15.1	15.1	15.1	0
941500	33.6	31.5	31.5	32.2	1.21244
942000	18.8	18.8	18.8	18.8	0
942500	18	18	18	18	0
943000	28.3	28.3	28.3	28.3	0
943500	25	25	25	25	0
944000	24	22.2	22.2	22.8	1.03923
944500	26	26	26	26	0
945000	22.2	22.2	22.2	22.2	0
945500	36.6	32.8	32.8	34.0667	2.19393
946000	17.1	17.1	17.1	17.1	0
946500	24.4	24.4	24.4	24.4	4.35117e-15
947000	22.7	22.7	22.7	22.7	0
947500	20.2	20.2	20.2	20.2	0
948000	21.5	21.5	21.5	21.5	0
948500	21.9	21.9	21.9	21.9	4.35117e-15
949000	21.6	21.6	21.6	21.6	4.35117e-15
949500	25.6	23.9	23.9	24.4667	0.981495
950000	19	19	19	19	0
950500	19.5	19.5	19.5	19.5	0
951000	24.9	24.9	24.9	24.9	4.35117e-15
951500	28.9	28.9	28.9	28.9	4.35117e-15
952000	37.3	37.3	37.3	37.3	0
952500	20.4	20.4	20.4	20.4	0
953000	19.3	19.3	19.3	19.3	0
953500	31.1	31.1	31.1	31.1	4.35117e-15
954000	26.1	26.1	26.1	26.1	4.35117e-15
954500	23.2	23.2	23.2	23.2	0
955000	35.5	32.6	32.6	33.5667	1.67432
955500	31.7	27.8	29.8	29.7667	1.95021
956000	14.7	14.7	14.7	14.7	2.17558e-15
956500	22.2	20.5	20.5	21.0667	0.981495
957000	19.5	19.5	19.5	19.5	0
957500	28.7	28.7	28.7	28.7	0
958000	40.7	40.7	40.7	40.7	0
958500	24.1	24.1	24.1	24.1	4.35117e-15
959000	22.9	21.3	22.9	22.3667	0.92376
959500	20.8	18.9	18.9	19.5333	1.09697
960000	16.7	15.3	16.7	16.2333	0.80829
960500	19.9	19.9	19.9	19.9	0
961000	18.9	18.9	18.9	18.9	0
961500	28	28	28	28	0
962000	22.1	22.1	22.1	22.1	4.35117e-15
962500	27	25.2	25.2	25.8	1.03923
963000	30.2	30.2	30.2	30.2	0
963500	16.1	16.1	16.1	16.1	0
964000	20.3	20.3	20.3	20.3	0
964500	22.2	22.2	22.2	22.2	0
965000	18	18	18	18	0
965500	24.4	24.4	24.4	24.4	4.35117e-15
966000	17.3	17.3	17.3	17.3	0
966500	20.7	17.3	19	19	1.7
967000	27.6	27.6	27.6	27.6	4.35117e-15
967500	25.9	25.9	25.9	25.9	4.35117e-15
968000	20.2	20.2	20.2	20.2	0
968500	27	25.1	25.1	25.7333	1.09697
969000	25.1	25.1	25.1	25.1	4.35117e-15
969500	21.6	21.6	21.6	21.6	4.35117e-15
970000	18.4	16.9	16.9	17.4	0.866025
970500	20.3	20.2	20.2	20.2333	0.057735
971000	19.9	19.9	19.9	19.9	0
971500	22.9	22.9	22.9	22.9	4.35117e-15
972000	30.3	30.3	30.3	30.3	0
972500	25	23.2	23.2	23.8	1.03923
973000	29	29	29	29	0
973500	32.8	29.9	29.9	30.8667	1.67432
974000	28.2	28.2	28.2	28.2	0
974500	23.4	23.4	23.4	23.4	4.35117e-15
975000	24.6	24.6	24.6	24.6	4.35117e-15
975500	16.8	16.8	16.8	16.8	0
976000	21.2	21.2	21.2	21.2	0
976500	36.2	34.2	36.2	35.5333	1.1547
977000	17.8	16	17.8	17.2	1.03923
977500	15.6	14.2	14.2	14.6667	0.80829
978000	16.2	16.2	16.2	16.2	0
978500	26.1	26.1	26.1	26.1	4.35117e-15
979000	30.9	30.9	30.9	30.9	4.35117e-15
979500	23.7	23.7	23.7	23.7	0
980000	28.5	28.5	28.5	28.5	0
980500	27.5	27.5	27.5	27.5	0
981000	17.5	17.5	17.5	17.5	0
981500	17.1	17.1	17.1	17.1	0
982000	23.5	23.5	23.5	23.5	0
982500	27	27	27	27	0
983000	20.4	20.4	20.4	20.4	0
983500	24.3	24.3	24.3	24.3	0
984000	25.1	25.1	25.1	25.1	4.35117e-15
984500	24.6	24.6	24.6	24.6	4.35117e-15
985000	15.2	15.2	15.2	15.2	2.17558e-15
985500	21.2	17.4	17.4	18.6667	2.19393
986000	35.5	35.5	35.5	35.5	0
986500	17.4	15.7	17.4	16.8333	0.981495
987000	27.7	27.7	27.7	27.7	0
987500	20.2	20.2	20.2	20.2	0
988000	22.4	22.4	22.4	22.4	4.35117e-15
988500	31.8	30	31.8	31.2	1.03923
989000	16.5	16.5	16.5	16.5	0
989500	20.9	20.9	20.9	20.9	0
990000	31.7	31.7	31.7	31.7	0
990500	23.5	23.5	23.5	23.5	0
991000	18.9	18.9	18.9	18.9	0
991500	17.5	17.5	17.5	17.5	0
992000	27.6	27.6	27.6	27.6	4.35117e-15
992500	26.4	26.4	26.4	26.4	4.35117e-15
993000	24.3	24.3	24.3	24.3	0
993500	31.3	27.6	29.4	29.4333	1.85023
994000	28.7	28.7	28.7	28.7	0
994500	19	19	19	19	0
995000	28.1	28.1	28.1	28.1	4.35117e-15
995500	34.2	32.4	32.4	33	1.03923
996000	17.8	16.2	16.2	16.7333	0.92376
996500	15.7	15.7	15.7	15.7	2.17558e-15
997000	38	38	38	38	0
997500	19.8	19.8	19.8	19.8	0
998000	22.6	22.6	22.6	22.6	4.35117e-15
998500	25.4	23.8	25.4	24.8667	0.92376
999000	30.6	30.6	30.6	30.6	4.35117e-15
999500	16.6	16.6	16.6	16.6	0
1000000	31.9	31.9	31.9	31.9	4.35117e-15
1000500	31.4	29.6	31.4	30.8	1.03923
1001000	19.6	19.6	19.6	19.6	0
1001500	23.8	23.8	23.8	23.8	0
1002000	21.1	19.2	19.2	19.8333	1.09697
1002500	28.7	28.7	28.7	28.7	0

## Sheet: 2-phenethyl acetate-pb3B
	GC-SSR responses to furaneol 2-phenethyl acetate
T[ms]	F[Hz]	F[Hz]	F[Hz]	Average	SD
150000	6.5	4.8	0.9	4.06667	2.87112
150500	2.6	1.5	0.7	1.6	0.953939
151000	2	0.9	0.7	1.2	0.7
151500	11.2	0.7	0.5	4.13333	6.12073
152000	8	0.5	0.4	2.96667	4.35928
152500	2.8	0.5	0.4	1.23333	1.35769
153000	5.2	0.5	0.4	2.03333	2.74287
153500	7.2	0.8	0.4	2.8	3.81576
154000	10.4	3.8	0.7	4.96667	4.95412
154500	14.2	4.2	2	6.8	6.50231
155000	2	0.9	0.9	1.26667	0.635085
155500	2.9	0.9	0.9	1.56667	1.1547
156000	12.5	2.1	0.5	5.03333	6.51562
156500	4.3	1	0.4	1.9	2.1
157000	1.5	0.7	0.4	0.866667	0.568624
157500	5	0.7	0.4	2.03333	2.57358
158000	4	1	0.4	1.8	1.92873
158500	5.1	1.1	0.4	2.2	2.53574
159000	2.3	0.8	0.3	1.13333	1.04083
159500	3.7	0.8	0.3	1.6	1.83576
160000	3.1	0.7	0.3	1.36667	1.51438
160500	2.3	0.6	0.3	1.06667	1.07858
161000	5.5	0.6	0.3	2.13333	2.91947
161500	5.5	1	0.5	2.33333	2.75379
162000	7.5	2.3	1.1	3.63333	3.40196
162500	5.9	1.9	1.1	2.96667	2.57164
163000	4.4	2.1	1	2.5	1.73494
163500	7.7	3.7	2	4.46667	2.92632
164000	4	1.7	0.7	2.13333	1.69214
164500	5	1.9	0.5	2.46667	2.3029
165000	2.2	1.4	0.5	1.36667	0.85049
165500	3	0.9	0.5	1.46667	1.34288
166000	7.1	0.8	0.4	2.76667	3.7581
166500	1.7	0.4	0.4	0.833333	0.750555
167000	1	0.4	0.4	0.6	0.34641
167500	1.4	0.4	0.4	0.733333	0.57735
168000	2.1	0.4	0.4	0.966667	0.981495
168500	2.7	0.4	0.4	1.16667	1.32791
169000	5.4	0.8	0.8	2.33333	2.65581
169500	6.8	1.3	1.3	3.13333	3.17543
170000	6.3	1	0.5	2.6	3.21403
170500	3.7	0.8	0.3	1.6	1.83576
171000	5.5	0.6	0.3	2.13333	2.91947
171500	4.8	0.4	0.3	1.83333	2.5697
172000	2.5	0.4	0.3	1.06667	1.24231
172500	1	0.4	0.3	0.566667	0.378594
173000	1.6	0.4	0.3	0.766667	0.723418
173500	6.7	0.7	0.4	2.6	3.55387
174000	9.1	2.3	0.7	4.03333	4.46019
174500	11.1	3.6	0.7	5.13333	5.36687
175000	10.8	1.3	0.7	4.26667	5.66598
175500	4.9	0.8	0.7	2.13333	2.39653
176000	7.6	1.3	0.9	3.26667	3.7581
176500	11.2	4	1.3	5.5	5.11762
177000	13.7	5.1	2.9	7.23333	5.70731
177500	11.3	2.8	1.9	5.33333	5.18684
178000	15.3	1.9	1.6	6.26667	7.82453
178500	7.9	1.8	1.8	3.83333	3.52184
179000	4.4	1.2	1.1	2.23333	1.87705
179500	4.7	1.1	0.9	2.23333	2.13854
180000	4.4	1.8	0.9	2.36667	1.81751
180500	5.9	2.9	1.3	3.36667	2.33524
181000	6.3	0.5	0.5	2.43333	3.34863
181500	4.3	0.3	0.3	1.63333	2.3094
182000	2.4	0.3	0.3	1	1.21244
182500	1.2	0.3	0.3	0.6	0.519615
183000	3.5	0.3	0.3	1.36667	1.84752
183500	2.4	0.3	0.3	1	1.21244
184000	5.1	0.5	0.3	1.96667	2.71539
184500	11.8	2	0.4	4.73333	6.17198
185000	7.2	1.1	0.9	3.06667	3.58097
185500	3.8	1.1	0.3	1.73333	1.83394
186000	5.5	1.2	0.2	2.3	2.81603
186500	10.8	1.6	0.2	4.2	5.75847
187000	5.5	0.7	0.2	2.13333	2.92632
187500	3.5	0.7	0.2	1.46667	1.77858
188000	6.4	1.2	0.2	2.6	3.32866
188500	7.6	1.3	0.2	3.03333	3.99291
189000	7.6	0.7	0.2	2.83333	4.13562
189500	3.9	1.2	0.2	1.76667	1.91398
190000	6	1.6	0.2	2.6	3.02655
190500	9.8	1.1	0.2	3.7	5.30189
191000	5.4	1.3	0.3	2.33333	2.70247
191500	11.7	1.7	0.8	4.73333	6.05007
192000	4.8	1.6	0.3	2.23333	2.31589
192500	4.9	3.3	0.2	2.8	2.38956
193000	11.5	3.8	0.2	5.16667	5.77264
193500	6.3	2.4	0.2	2.96667	3.08923
194000	7.3	1.2	0.2	2.9	3.84318
194500	9.1	1.6	0.2	3.63333	4.78574
195000	6.4	1.6	0.2	2.73333	3.25167
195500	5	0.8	0.2	2	2.61534
196000	2.9	0.5	0.2	1.2	1.47986
196500	4.5	0.5	0.2	1.73333	2.40069
197000	2.3	0.5	0.2	1	1.13578
197500	10.4	1.1	0.3	3.93333	5.61456
198000	6.8	2.5	1.2	3.5	2.93087
198500	5	2	1	2.66667	2.08167
199000	4.6	1.6	1.1	2.43333	1.89297
199500	6.8	2.3	1.1	3.4	3.005
200000	5.1	1.5	1.1	2.56667	2.20303
200500	5.6	1.1	1.1	2.6	2.59808
201000	10.8	1	1	4.26667	5.65803
201500	5.2	0.9	0.9	2.33333	2.48261
202000	4.5	0.9	0.9	2.1	2.07846
202500	3.6	0.9	0.9	1.8	1.55885
203000	5.6	0.9	0.9	2.46667	2.71355
203500	4.2	1	1	2.06667	1.84752
204000	4.9	1.6	0.7	2.4	2.21133
204500	9.8	1.5	0.5	3.93333	5.10523
205000	6.4	1	0.5	2.63333	3.27159
205500	6.7	1.2	0.5	2.8	3.39559
206000	8.8	3.1	0.9	4.26667	4.07717
206500	7.6	5.6	5.6	6.26667	1.1547
207000	14.4	3.7	0.6	6.23333	7.2404
207500	8.7	1	0.3	3.33333	4.66083
208000	4.5	0.7	0.3	1.83333	2.31805
208500	4.2	0.7	0.3	1.73333	2.14554
209000	7.2	1	0.3	2.83333	3.79781
209500	9.3	2.6	0.5	4.13333	4.59601
210000	12.2	3	1.2	5.46667	5.90028
210500	5.8	2.5	1.4	3.23333	2.28983
211000	11.5	0.7	0.7	4.3	6.23538
211500	3	0.5	0.5	1.33333	1.44338
212000	3.3	0.5	0.5	1.43333	1.61658
212500	5.5	0.5	0.5	2.16667	2.88675
213000	4.2	0.8	0.6	1.86667	2.0232
213500	8.8	2.8	0.7	4.1	4.20357
214000	7.4	2.3	0.7	3.46667	3.49905
214500	9.6	2	0.6	4.06667	4.84286
215000	6.6	2.2	0.5	3.1	3.14802
215500	4	1.1	0.5	1.86667	1.87172
216000	8.1	1.1	0.5	3.23333	4.22532
216500	11.4	1.2	0.5	4.36667	6.10109
217000	7.9	1.1	0.4	3.13333	4.14287
217500	7.3	1	0.3	2.86667	3.8553
218000	5.2	0.8	0.3	2.1	2.69629
218500	6.4	0.7	0.3	2.46667	3.41223
219000	3.5	0.9	0.3	1.56667	1.70098
219500	4.5	1.1	0.3	1.96667	2.2301
220000	4.6	1.9	0.7	2.4	1.9975
220500	3.2	1.6	1.6	2.13333	0.92376
221000	3.7	2	0.7	2.13333	1.50444
221500	5.4	2.4	0.4	2.73333	2.51661
222000	5.4	2	0.4	2.6	2.55343
222500	8	1.8	0.4	3.4	4.04475
223000	12.1	5.2	0.4	5.9	5.88133
223500	14.8	7.2	0.4	7.46667	7.2037
224000	5.5	3	0.4	2.96667	2.55016
224500	7.5	1.5	0.4	3.13333	3.82143
225000	6.7	2.4	0.4	3.16667	3.21921
225500	11.2	4.1	0.6	5.3	5.40093
226000	9	3	1.5	4.5	3.96863
226500	9.7	2.4	1	4.36667	4.67155
227000	5.8	0.9	0.5	2.4	2.95127
227500	6.9	0.7	0.5	2.7	3.63868
228000	8.3	0.7	0.5	3.16667	4.44672
228500	4.1	1.3	0.9	2.1	1.74356
229000	11	3.1	3.1	5.73333	4.56107
229500	3	1	1	1.66667	1.1547
230000	4.8	0.7	0.7	2.06667	2.36714
230500	3.8	1.4	0.7	1.96667	1.62583
231000	12.6	1.3	0.7	4.86667	6.70398
231500	2.8	0.7	0.7	1.4	1.21244
232000	3.1	0.7	0.7	1.5	1.38564
232500	4.1	0.6	0.6	1.76667	2.02073
233000	2.8	0.6	0.6	1.33333	1.27017
233500	2.1	0.6	0.6	1.1	0.866025
234000	13.3	0.5	0.5	4.76667	7.39008
234500	9	0.4	0.4	3.26667	4.96521
235000	5.2	0.4	0.4	2	2.77128
235500	4.7	0.4	0.4	1.83333	2.48261
236000	1.6	0.4	0.4	0.8	0.69282
236500	5.2	0.4	0.4	2	2.77128
237000	3.7	0.4	0.3	1.46667	1.93477
237500	5.7	0.4	0.3	2.13333	3.08923
238000	3.8	0.4	0.3	1.5	1.99249
238500	4.9	0.4	0.3	1.86667	2.62742
239000	3.1	0.6	0.3	1.33333	1.53731
239500	4.7	2.7	0.5	2.63333	2.10079
240000	12.6	3.6	1.1	5.76667	6.04842
240500	6.7	2.3	1	3.33333	2.98719
241000	6.5	1	1	2.83333	3.17543
241500	7.1	1.5	1.4	3.33333	3.26241
242000	7.1	3.4	2.3	4.26667	2.51462
242500	8.5	1.3	0.6	3.46667	4.37302
243000	7.2	0.9	0.4	2.83333	3.7899
243500	6.1	1.1	0.4	2.53333	3.10859
244000	5.3	1.4	0.4	2.36667	2.58908
244500	8.7	1.2	0.4	3.43333	4.57857
245000	2.7	1	0.4	1.36667	1.19304
245500	8.9	1.3	0.6	3.6	4.60326
246000	10.3	3.2	2	5.16667	4.4859
246500	8.5	5.6	1.4	5.16667	3.56978
247000	7.9	4.4	1.6	4.63333	3.15647
247500	6.9	2.2	1.1	3.4	3.08058
248000	7.7	3.6	2.2	4.5	2.85832
248500	10	2.6	2.6	5.06667	4.27239
249000	3.2	1.1	1.1	1.8	1.21244
249500	4.9	0.9	0.8	2.2	2.3388
250000	9.6	0.8	0.6	3.66667	5.13939
250500	8.4	1.2	0.6	3.4	4.34051
251000	6	2.7	1	3.23333	2.54231
251500	6.2	3.1	1.8	3.7	2.26053
252000	6.5	3.5	1.2	3.73333	2.65769
252500	9.3	3.2	1.3	4.6	4.17971
253000	11.1	2.6	0.8	4.83333	5.50121
253500	9.7	3.1	0.8	4.53333	4.61988
254000	6.8	0.7	0.5	2.66667	3.58097
254500	6.5	0.4	0.4	2.43333	3.52184
255000	3	0.4	0.4	1.26667	1.50111
255500	3.2	0.4	0.4	1.33333	1.61658
256000	2.8	0.4	0.4	1.2	1.38564
256500	11.9	1	0.6	4.5	6.41171
257000	14.2	5.3	3	7.5	5.91523
257500	12.7	3.6	1.5	5.93333	5.95343
258000	6.4	1.5	0.9	2.93333	3.01717
258500	8.4	1	0.4	3.26667	4.45571
259000	5	0.7	0.2	1.96667	2.63881
259500	5.3	0.9	0.2	2.13333	2.76466
260000	5	1.1	0.2	2.1	2.55147
260500	5.4	1.8	0.2	2.46667	2.66333
261000	8.5	1.3	0.2	3.33333	4.50814
261500	5.3	0.8	0.2	2.1	2.78747
262000	6.8	1.3	0.2	2.76667	3.53601
262500	5.6	1.5	0.3	2.46667	2.77909
263000	4.9	0.7	0.5	2.03333	2.48462
263500	9.1	0.7	0.5	3.43333	4.9085
264000	4.2	1.1	0.5	1.93333	1.98578
264500	7	2.8	0.6	3.46667	3.25167
265000	5.2	1.6	0.7	2.5	2.38118
265500	7.2	1.8	0.7	3.23333	3.47898
266000	9.6	1.5	0.4	3.83333	5.02427
266500	7.6	0.6	0.3	2.83333	4.13078
267000	2.9	0.6	0.3	1.26667	1.42244
267500	8	0.7	0.3	3	4.33474
268000	2.8	0.8	0.3	1.3	1.32288
268500	5.2	0.8	0.3	2.1	2.69629
269000	7.4	1.9	0.6	3.3	3.60971
269500	3	1.5	0.5	1.66667	1.25831
270000	1.8	1.6	0.5	1.3	0.7
270500	5.5	1.7	0.5	2.56667	2.61024
271000	8.6	3.1	0.8	4.16667	4.00791
271500	10	2.1	0.5	4.2	5.08626
272000	7.1	1.3	0.3	2.9	3.67151
272500	4	1.4	0.3	1.9	1.9
273000	4.7	3.3	0.3	2.76667	2.24796
273500	8.6	3.4	0.3	4.1	4.19404
274000	4.8	1.8	0.3	2.3	2.29129
274500	3.4	0.8	0.3	1.5	1.66433
275000	7.5	1.2	0.5	3.06667	3.8553
275500	6.2	2.6	1.3	3.36667	2.53837
276000	7.3	1.2	0.6	3.03333	3.7072
276500	4.6	0.7	0.4	1.9	2.34307
277000	10.2	0.8	0.4	3.8	5.54617
277500	7.7	1	0.4	3.03333	4.05257
278000	4.4	0.7	0.4	1.83333	2.22785
278500	3.3	0.6	0.5	1.46667	1.5885
279000	5	0.6	0.5	2.03333	2.5697
279500	10.6	0.6	0.5	3.9	5.80259
280000	8.1	1.5	0.5	3.36667	4.12957
280500	7.9	0.8	0.4	3.03333	4.2194
281000	11	0.4	0.4	3.93333	6.11991
281500	5.5	0.4	0.4	2.1	2.94449
282000	8.7	0.4	0.4	3.16667	4.79201
282500	4.1	0.8	0.4	1.76667	2.0306
283000	5.8	1.1	0.5	2.46667	2.9023
283500	2.4	0.7	0.7	1.26667	0.981495
284000	5.5	0.7	0.7	2.3	2.77128
284500	9.2	0.8	0.5	3.5	4.93862
285000	4.3	0.8	0.4	1.83333	2.14554
285500	7.4	0.7	0.4	2.83333	3.95769
286000	4.2	0.7	0.4	1.76667	2.11266
286500	4.4	0.7	0.4	1.83333	2.22785
287000	6.9	1.4	0.6	2.96667	3.42977
287500	4.8	0.8	0.4	2	2.43311
288000	6.5	0.8	0.4	2.56667	3.41223
288500	14.2	1.3	0.4	5.3	7.72075
289000	10.6	1.4	0.4	4.13333	5.62257
289500	9.2	1.9	0.7	3.93333	4.60036
290000	6.8	2.2	0.4	3.13333	3.30051
290500	3.7	1.1	0.2	1.66667	1.81751
291000	3.2	0.8	0.2	1.4	1.58745
291500	4.5	0.7	0.2	1.8	2.3516
292000	7	0.7	0.2	2.63333	3.7899
292500	7.8	1.4	0.2	3.13333	4.08575
293000	5.5	2.1	0.2	2.6	2.68514
293500	3.2	1.1	0.2	1.5	1.53948
294000	9.3	1.5	0.4	3.73333	4.85215
294500	4.8	2.5	0.8	2.7	2.00749
295000	2.8	0.8	0.4	1.33333	1.28582
295500	1.7	0.8	0.4	0.966667	0.665833
296000	5.9	2.2	0.4	2.83333	2.80416
296500	9.5	2.7	0.8	4.33333	4.5742
297000	3.1	2	2	2.36667	0.635085
297500	3.5	2.3	1.1	2.3	1.2
298000	7.5	2.7	0.9	3.7	3.41174
298500	9	2.9	0.5	4.13333	4.38216
299000	8.1	2.3	0.3	3.56667	4.05134
299500	8.5	1.2	0.3	3.33333	4.49704
300000	3.4	1	0.3	1.56667	1.62583
300500	8.7	1.5	0.3	3.5	4.54313
301000	11.1	1.2	0.3	4.2	5.9925
301500	8.1	1.1	0.5	3.23333	4.22532
302000	5.8	1.1	1	2.63333	2.74287
302500	8	2.2	0.2	3.46667	4.05134
303000	6.4	1.6	0.1	2.7	3.2909
303500	6.9	1.1	0.1	2.7	3.67151
304000	8.2	1.3	0.1	3.2	4.3715
304500	8.2	1.9	0.1	3.4	4.25323
305000	7.3	1.1	0.1	2.83333	3.90043
305500	2.6	0.4	0.1	1.03333	1.36504
306000	3.1	0.2	0.1	1.13333	1.70392
306500	3.8	0.2	0.1	1.36667	2.10792
307000	4.1	0.2	0.1	1.46667	2.28108
307500	3.7	0.2	0.1	1.33333	2.0502
308000	3.9	0.2	0.1	1.4	2.16564
308500	6.8	0.2	0.1	2.36667	3.8397
309000	5.4	0.2	0.1	1.9	3.0315
309500	6.1	0.4	0.2	2.23333	3.35012
310000	4.2	0.8	0.6	1.86667	2.0232
310500	3.9	0.8	0.6	1.76667	1.85023
311000	2.5	1.1	0.6	1.4	0.984886
311500	5.2	1.9	0.6	2.56667	2.37136
312000	6.7	1.4	0.7	2.93333	3.28075
312500	9.9	1.2	0.7	3.93333	5.17333
313000	5.1	2.4	0.9	2.8	2.12838
313500	7.6	5.6	0.7	4.63333	3.55012
314000	4	1.5	0.7	2.06667	1.72143
314500	5.4	1.7	0.8	2.63333	2.4379
315000	5.1	3.4	1	3.16667	2.05994
315500	5.8	4.4	1.2	3.8	2.35797
316000	9.5	3.5	0.7	4.56667	4.49592
316500	9	2.5	0.7	4.06667	4.36616
317000	10.6	1.7	0.8	4.36667	5.41695
317500	3.2	1.6	1	1.93333	1.13725
318000	9.1	4.1	1.3	4.83333	3.95137
318500	9.4	1.3	0.9	3.86667	4.79618
319000	3.5	0.6	0.6	1.56667	1.67432
319500	3	0.6	0.6	1.4	1.38564
320000	4.6	0.6	0.6	1.93333	2.3094
320500	7.7	0.9	0.9	3.16667	3.92598
321000	3.4	0.7	0.7	1.6	1.55885
321500	5.8	0.7	0.7	2.4	2.94449
322000	12.3	1.7	1.7	5.23333	6.11991
322500	5.1	1.9	1.9	2.96667	1.84752
323000	6.2	1	1	2.73333	3.00222
323500	5.8	0.8	0.8	2.46667	2.88675
324000	8.6	0.8	0.8	3.4	4.50333
324500	12.8	1.1	0.6	4.83333	6.90386
325000	3.8	0.7	0.3	1.6	1.91572
325500	5	0.7	0.3	2	2.60576
326000	4.6	1.3	0.3	2.06667	2.25019
326500	2.5	0.9	0.3	1.23333	1.13725
327000	1.7	0.6	0.3	0.866667	0.737111
327500	1.5	0.6	0.3	0.8	0.6245
328000	2.9	1	0.2	1.36667	1.38684
328500	5.4	2.6	0.2	2.73333	2.60256
329000	3.3	0.8	0.2	1.43333	1.64418
329500	2	0.5	0.2	0.9	0.964365
330000	2.2	0.5	0.2	0.966667	1.07858
330500	4.9	0.5	0.2	1.86667	2.63122
331000	4.5	0.6	0.2	1.76667	2.37557
331500	3.4	0.7	0.2	1.43333	1.72143
332000	4.4	0.7	0.2	1.76667	2.2942
332500	3.4	0.7	0.3	1.46667	1.68622
333000	1.3	0.6	0.5	0.8	0.43589
333500	4.3	0.6	0.5	1.8	2.16564
334000	5.8	1	0.5	2.43333	2.92632
334500	8.7	2.5	0.5	3.9	4.27551
335000	6.8	1	0.5	2.76667	3.5019
335500	8.9	0.6	0.5	3.33333	4.82113
336000	7	0.6	0.5	2.7	3.72424
336500	8.2	1.2	0.5	3.3	4.25793
337000	11.8	0.6	0.6	4.33333	6.46632
337500	13	0.6	0.6	4.73333	7.15914
338000	3.8	0.6	0.6	1.66667	1.84752
338500	4.8	0.6	0.6	2	2.42487
339000	3.8	0.7	0.7	1.73333	1.78979
339500	10.9	0.7	0.7	4.1	5.88897
340000	7	0.8	0.8	2.86667	3.57957
340500	6.3	0.9	0.9	2.7	3.11769
341000	5.4	0.9	0.7	2.33333	2.65769
341500	4.7	0.9	0.6	2.06667	2.28546
342000	5.4	1.1	0.6	2.36667	2.63881
342500	9	1.9	0.3	3.73333	4.63069
343000	7.7	2.2	0.2	3.36667	3.88373
343500	6.2	0.6	0.2	2.33333	3.3546
344000	5.1	0.4	0.2	1.9	2.77308
344500	12.5	0.4	0.2	4.36667	7.04438
345000	5.3	0.4	0.2	1.96667	2.88848
345500	4.4	0.4	0.2	1.66667	2.36925
346000	7.4	0.6	0.2	2.73333	4.0464
346500	12.2	1.6	0.2	4.66667	6.5615
347000	9.2	1.1	0.2	3.5	4.95681
347500	4.4	1.1	0.2	1.9	2.21133
348000	4	1.1	0.2	1.76667	1.98578
348500	8.7	1.9	0.5	3.7	4.38634
349000	6.9	3.4	0.5	3.6	3.20468
349500	7	0.7	0.2	2.63333	3.7899
350000	9.6	0.4	0.2	3.4	5.37029
350500	2.9	0.4	0.2	1.16667	1.50444
351000	2.1	0.4	0.2	0.9	1.04403
351500	4.6	0.8	0.2	1.86667	2.38607
352000	9.7	2.3	0.2	4.06667	4.99032
352500	4.6	1.6	0.2	2.13333	2.24796
353000	7	2.8	0.4	3.4	3.34066
353500	5.9	4.2	2.1	4.06667	1.90351
354000	10.4	1.4	0.4	4.06667	5.50757
354500	7.9	1.1	0.3	3.1	4.17612
355000	5.4	1	0.3	2.23333	2.76466
355500	5.6	1	0.3	2.3	2.87924
356000	9	2	0.3	3.76667	4.61122
356500	10.4	2	0.3	4.23333	5.40771
357000	14.9	1.4	0.3	5.53333	8.1304
357500	7	1.2	0.3	2.83333	3.63639
358000	4.4	2.4	0.4	2.4	2
358500	1	1	0.6	0.866667	0.23094
359000	1.8	1.5	0.6	1.3	0.6245
359500	6.5	2.1	0.9	3.16667	2.94845
360000	7.4	3.6	1.2	4.06667	3.12623
360500	4.1	3.7	1.1	2.96667	1.62891
361000	8.1	4.8	1.9	4.93333	3.10215
361500	9.6	4.8	3.6	6	3.1749
362000	19.7	4.8	0.6	8.36667	10.0371
362500	8	2.5	0.2	3.56667	4.00791
363000	5.7	1.8	0.2	2.56667	2.82902
363500	3	2.6	0.2	1.93333	1.51438
364000	12.4	1.6	0.2	4.73333	6.67633
364500	5.7	0.6	0.2	2.16667	3.06649
365000	3.1	0.6	0.2	1.3	1.57162
365500	9.4	1.1	0.2	3.56667	5.07182
366000	8.5	3.9	0.5	4.3	4.01497
366500	8.8	1.5	1.5	3.93333	4.21466
367000	6.2	0.9	0.9	2.66667	3.05996
367500	16.4	2.3	0.9	6.53333	8.57341
368000	10.9	2.7	0.3	4.63333	5.55818
368500	6	1	0.3	2.43333	3.10859
369000	2.9	0.6	0.3	1.26667	1.42244
369500	1	0.6	0.3	0.633333	0.351188
370000	1.5	1	0.3	0.933333	0.602771
370500	5.2	2.6	0.3	2.7	2.45153
371000	7.7	3.5	0.4	3.86667	3.66379
371500	8.9	3	0.6	4.16667	4.27122
372000	6.3	2.4	0.6	3.1	2.91376
372500	6.5	1.7	0.8	3	3.06431
373000	7.7	1.8	1.3	3.6	3.55949
373500	9.2	2.3	1.1	4.2	4.3715
374000	7.4	2.1	1.5	3.66667	3.24705
374500	5.7	1.3	1.3	2.76667	2.54034
375000	11.7	0.9	0.9	4.5	6.23538
375500	8.3	1.4	1.4	3.7	3.98372
376000	10.9	4.1	1.4	5.46667	4.89524
376500	14.5	2.8	0.9	6.06667	7.36501
377000	9.8	2.1	0.4	4.1	5.00899
377500	7.9	1.4	0.2	3.16667	4.14287
378000	4.6	1.3	0.2	2.03333	2.28983
378500	3.8	1.2	0.2	1.73333	1.85831
379000	8.1	1.2	0.2	3.16667	4.30155
379500	8.4	1	0.2	3.2	4.52106
380000	3.3	0.5	0.2	1.33333	1.70978
380500	7.8	0.5	0.2	2.83333	4.30387
381000	6.7	0.5	0.2	2.46667	3.66924
381500	4.4	0.9	0.5	1.93333	2.14554
382000	5.4	0.9	0.9	2.4	2.59808
382500	6.2	1.3	1.3	2.93333	2.82902
383000	9.1	3.6	3.6	5.43333	3.17543
383500	9.7	3.2	2.4	5.1	4.00375
384000	16.4	2.4	1.2	6.66667	8.45064
384500	4.7	1.1	1.1	2.3	2.07846
385000	6.8	1.6	1.5	3.3	3.0315
385500	8.3	3.4	2.2	4.63333	3.23161
386000	9.6	1.3	0.7	3.86667	4.97427
386500	9.6	0.6	0.5	3.56667	5.22526
387000	6.6	0.6	0.5	2.56667	3.49333
387500	10.7	1	0.5	4.06667	5.75007
388000	12.4	4.5	1.2	6.03333	5.75529
388500	9.3	1.7	1.3	4.1	4.50777
389000	3.4	0.9	0.7	1.66667	1.50444
389500	11.5	2.7	1.3	5.16667	5.52932
390000	6.9	1.7	0.7	3.1	3.32866
390500	4	0.9	0.4	1.76667	1.95021
391000	6.6	0.7	0.4	2.56667	3.49619
391500	5.4	0.6	0.4	2.13333	2.83078
392000	3.7	0.6	0.4	1.56667	1.85023
392500	7.3	0.7	0.5	2.83333	3.86954
393000	7.2	0.8	0.8	2.93333	3.69504
393500	4.6	1.1	1.1	2.26667	2.02073
394000	10.7	1.4	1.4	4.5	5.36936
394500	9.3	1.3	1.2	3.93333	4.64794
395000	5.9	1.2	1	2.7	2.77308
395500	12	1.6	1.2	4.93333	6.12318
396000	12.2	0.8	0.8	4.6	6.58179
396500	10	0.8	0.8	3.86667	5.31162
397000	13.3	1.4	0.9	5.2	7.01926
397500	6.7	1.2	1	2.96667	3.23471
398000	7.8	2.4	0.9	3.7	3.62905
398500	6	1	0.9	2.63333	2.91605
399000	7.3	1.6	0.9	3.26667	3.51046
399500	9.9	2.7	0.8	4.46667	4.80035
400000	11.3	2	0.8	4.7	5.74717
400500	8.7	2	0.7	3.8	4.29302
401000	4.6	1.5	0.7	2.26667	2.05994
401500	6.3	1.7	0.7	2.9	2.98664
402000	9	2.3	1.1	4.13333	4.25715
402500	9.2	1.1	0.5	3.6	4.85901
403000	12	1.7	0.5	4.73333	6.32166
403500	13.8	4	0.5	6.1	6.8942
404000	6.2	0.6	0.4	2.4	3.29242
404500	2	0.4	0.4	0.933333	0.92376
405000	5	0.4	0.4	1.93333	2.65581
405500	5.1	0.4	0.4	1.96667	2.71355
406000	2.4	0.4	0.4	1.06667	1.1547
406500	10.1	0.4	0.4	3.63333	5.6003
407000	5.9	0.5	0.5	2.3	3.11769
407500	11.6	1.5	0.8	4.63333	6.04345
408000	5.8	3.8	1	3.53333	2.41109
408500	10.8	2.6	1.3	4.9	5.15073
409000	9.7	1.4	0.4	3.83333	5.10523
409500	4	0.7	0.2	1.63333	2.06478
410000	9	0.7	0.2	3.3	4.94267
410500	7.8	0.6	0.2	2.86667	4.27707
411000	5.6	0.5	0.2	2.1	3.0348
411500	5.1	0.5	0.2	1.93333	2.74651
412000	7.3	0.5	0.2	2.66667	4.01539
412500	9.2	0.6	0.2	3.33333	5.08462
413000	5.3	0.8	0.2	2.1	2.78747
413500	9.4	1.1	0.4	3.63333	5.00633
414000	7.1	2.8	1.4	3.76667	2.97041
414500	5.5	1.2	0.9	2.53333	2.57358
415000	8.7	0.6	0.6	3.3	4.67654
415500	8.8	0.6	0.6	3.33333	4.73427
416000	8.2	1.4	1.4	3.66667	3.92598
416500	10.6	2	1.4	4.66667	5.14717
417000	11.2	1.1	1.1	4.46667	5.83124
417500	7.8	1.4	0.6	3.26667	3.94631
418000	12.3	2.3	0.4	5	6.39296
418500	4.8	2.5	0.4	2.56667	2.20076
419000	7.1	1.5	0.4	3	3.59305
419500	2.9	1	0.4	1.43333	1.30512
420000	5.7	1.3	0.8	2.6	2.69629
420500	4.5	0.9	0.9	2.1	2.07846
421000	7.8	1.1	1.1	3.33333	3.86825
421500	6	1.5	1.5	3	2.59808
422000	11.2	2	1.3	4.83333	5.52479
422500	8	0.9	0.5	3.13333	4.2194
423000	7.4	1.2	0.5	3.03333	3.79781
423500	5.1	1.7	0.5	2.43333	2.38607
424000	6.9	2	0.7	3.2	3.26956
424500	9.8	3.3	1.6	4.9	4.32782
425000	15.7	2.5	0.9	6.36667	8.1224
425500	5.7	0.9	0.4	2.33333	2.92632
426000	10.7	1	0.4	4.03333	5.78129
426500	3.8	1.2	0.4	1.8	1.77764
427000	3.7	1.7	0.4	1.93333	1.66233
427500	6.2	2.5	0.6	3.1	2.84781
428000	11	3.5	1.7	5.4	4.93254
428500	8.5	1.3	1.3	3.7	4.15692
429000	6.5	0.9	0.9	2.76667	3.23316
429500	7.2	1.2	1	3.13333	3.52326
430000	3	2.9	1.1	2.33333	1.06927
430500	15.7	5.2	1.8	7.56667	7.24592
431000	9.7	5.2	1	5.3	4.35086
431500	7.1	1.5	0.6	3.06667	3.52184
432000	3.7	1.1	0.6	1.8	1.66433
432500	7.8	2.7	0.5	3.66667	3.74477
433000	13	1	0.5	4.83333	7.07696
433500	5.4	0.6	0.5	2.16667	2.8006
434000	4	0.6	0.5	1.7	1.99249
434500	8.3	1	0.7	3.33333	4.30387
435000	7.1	2.1	1.1	3.43333	3.21455
435500	6.9	1	0.9	2.93333	3.4356
436000	6.2	0.7	0.7	2.53333	3.17543
436500	5.7	0.7	0.7	2.36667	2.88675
437000	5.3	1.6	0.5	2.46667	2.51462
437500	7.3	1.2	0.4	2.96667	3.77403
438000	5.5	0.8	0.4	2.23333	2.83608
438500	5.1	1.5	0.4	2.33333	2.45832
439000	8.9	3	0.4	4.1	4.35546
439500	7	2.8	1	3.6	3.07896
440000	8.5	1.9	1.2	3.86667	4.02782
440500	6.2	0.9	0.5	2.53333	3.18172
441000	11.5	1.2	0.5	4.4	6.15873
441500	5.6	1.7	0.5	2.6	2.66646
442000	10.8	3	0.8	4.86667	5.25484
442500	14.4	6.2	4.7	8.43333	5.22143
443000	8.3	3.3	3.3	4.96667	2.88675
443500	12.9	1.9	1.9	5.56667	6.35085
444000	9.4	2.8	1.9	4.7	4.09512
444500	4.9	1.3	1.1	2.43333	2.13854
445000	4.1	0.6	0.5	1.73333	2.0502
445500	1.5	0.6	0.5	0.866667	0.550757
446000	3.2	1.1	0.5	1.6	1.41774
446500	3.7	1.2	0.5	1.8	1.68226
447000	2.2	0.5	0.5	1.06667	0.981495
447500	3.6	0.5	0.5	1.53333	1.78979
448000	7.2	0.5	0.5	2.73333	3.86825
448500	6.8	0.9	0.9	2.86667	3.40637
449000	8.6	3.1	3.1	4.93333	3.17543
449500	12.8	3.3	3.2	6.43333	5.51392
450000	12.1	5.7	3.4	7.06667	4.50814
450500	7.7	3.4	1	4.03333	3.3946
451000	10.3	3	0.6	4.63333	5.05206
451500	7.3	2.4	0.6	3.43333	3.46747
452000	8.2	3	1.5	4.23333	3.51615
452500	11.1	6.3	1.3	6.23333	4.90034
453000	12.4	2.9	0.5	5.26667	6.29312
453500	11.1	1.8	0.5	4.46667	5.78129
454000	6	1	0.5	2.5	3.04138
454500	6.3	1.5	0.6	2.8	3.06431
455000	13.5	1.8	0.9	5.4	7.02922
455500	9.4	2.1	0.9	4.13333	4.60036
456000	10.5	1.6	0.5	4.2	5.48361
456500	10.3	1.7	0.5	4.16667	5.3454
457000	4.5	1.3	0.5	2.1	2.1166
457500	5.9	3	0.6	3.16667	2.65393
458000	14	5	0.9	6.63333	6.70099
458500	13.7	2.5	0.9	5.7	6.97424
459000	13	0.6	0.5	4.7	7.18818
459500	5.7	0.4	0.3	2.13333	3.08923
460000	5.1	0.4	0.3	1.93333	2.74287
460500	5.3	0.4	0.3	2	2.85832
461000	7.8	0.4	0.3	2.83333	4.30155
461500	10.4	0.9	0.3	3.86667	5.66598
462000	7.8	3.1	0.6	3.83333	3.65559
462500	12	1.8	0.6	4.8	6.26418
463000	8.5	0.6	0.3	3.13333	4.65009
463500	8.5	0.6	0.3	3.13333	4.65009
464000	12.8	0.7	0.3	4.6	7.10422
464500	8.7	0.7	0.3	3.23333	4.73849
465000	8.9	0.7	0.3	3.3	4.85386
465500	12.8	1.1	0.4	4.76667	6.96587
466000	3	0.9	0.8	1.56667	1.24231
466500	6.4	0.9	0.8	2.7	3.20468
467000	10.4	1.1	1.1	4.2	5.36936
467500	6.7	0.7	0.7	2.7	3.4641
468000	4	0.4	0.4	1.6	2.07846
468500	11.5	0.4	0.4	4.1	6.40859
469000	13	0.4	0.4	4.6	7.27461
469500	14.8	0.9	0.9	5.53333	8.02517
470000	4.6	1.4	1.4	2.46667	1.84752
470500	3	0.7	0.7	1.46667	1.32791
471000	10.1	1	0.7	3.93333	5.3426
471500	8.8	1.5	0.7	3.66667	4.46356
472000	11.5	1.4	0.7	4.53333	6.04345
472500	13	0.8	0.6	4.8	7.10211
473000	10.2	0.6	0.6	3.8	5.54256
473500	8.9	0.6	0.6	3.36667	4.79201
474000	5.5	0.6	0.6	2.23333	2.82902
474500	15.2	1.7	1.1	6	7.97308
475000	14.3	1.9	0.6	5.6	7.56241
475500	5.3	1.6	0.6	2.5	2.47588
476000	10.9	3	1	4.96667	5.23482
476500	4.8	1.8	1.8	2.8	1.73205
477000	3.5	2.4	2.4	2.76667	0.635085
477500	14.8	4.9	4.9	8.2	5.71577
478000	7.5	2.9	2.9	4.43333	2.65581
478500	10	1.7	0.7	4.13333	5.10523
479000	6.9	1	0.4	2.76667	3.59212
479500	6.3	1.3	0.4	2.66667	3.17857
480000	9.8	2.7	0.4	4.3	4.9
480500	7.9	3	0.4	3.76667	3.80832
481000	11.7	3.4	0.9	5.33333	5.65361
481500	11.7	1.8	1.8	5.1	5.71577
482000	15.6	3.7	0.9	6.73333	7.80534
482500	8.7	2.6	0.7	4	4.17971
483000	9	1.5	0.7	3.73333	4.57857
483500	9.7	2.6	1.3	4.53333	4.52143
484000	11	4.7	4.7	6.8	3.63731
484500	8.8	2.5	1.8	4.36667	3.8553
485000	8.3	4.4	2.6	5.1	2.91376
485500	14.8	3.7	3.7	7.4	6.40859
486000	11.6	4.2	4.2	6.66667	4.27239
486500	9.5	2.5	2.3	4.76667	4.10041
487000	7.8	2.6	1.3	3.9	3.43948
487500	13.3	2.1	1.4	5.6	6.67757
488000	11.4	0.8	0.8	4.33333	6.11991
488500	7	1.4	1.4	3.26667	3.23316
489000	10.1	4.6	3	5.9	3.72424
489500	14	1.2	1.1	5.43333	7.41912
490000	8.7	0.7	0.7	3.36667	4.6188
490500	8	0.7	0.7	3.13333	4.21466
491000	8	0.9	0.9	3.26667	4.09919
491500	8.1	1.9	1.3	3.76667	3.76475
492000	10.9	3.6	1.2	5.23333	5.05206
492500	12.5	2.6	0.8	5.3	6.3
493000	7.2	1.6	0.6	3.13333	3.55715
493500	7.3	2.8	0.6	3.56667	3.41516
494000	8.7	1.3	0.6	3.53333	4.48813
494500	6.9	1	0.8	2.9	3.46554
495000	9	1.5	0.8	3.76667	4.54569
495500	13.2	2.6	1.1	5.63333	6.59571
496000	13.4	2.4	1.4	5.73333	6.65833
496500	13.6	2.1	1.1	5.6	6.94622
497000	12.9	2.4	1.2	5.5	6.43661
497500	15.4	4	0.8	6.73333	7.6742
498000	12.7	1.3	0.6	4.86667	6.79289
498500	5.6	0.7	0.6	2.3	2.85832
499000	13.4	1.1	1	5.16667	7.13045
499500	11.2	3.8	2.5	5.83333	4.6929
500000	13.9	2.9	2.8	6.53333	6.37992
500500	10.6	2.2	2.2	5	4.84974
501000	9.3	1.3	1.3	3.96667	4.6188
501500	6.4	1.8	1.2	3.13333	2.84488
502000	7.3	1.7	1.1	3.36667	3.41955
502500	10.6	2.8	1.7	5.03333	4.85215
503000	11.2	4.4	2.2	5.93333	4.69184
503500	8.8	5.3	3.5	5.86667	2.69506
504000	12.6	4.4	1.5	6.16667	5.75702
504500	22.4	5.9	1.5	9.93333	11.0183
505000	11.1	2.5	2.5	5.36667	4.96521
505500	7.7	2.5	2.5	4.23333	3.00222
506000	9	2.3	2.1	4.46667	3.92726
506500	5.9	2.6	0.9	3.13333	2.54231
507000	1.3	1.1	0.6	1	0.360555
507500	3.6	1.9	0.6	2.03333	1.50444
508000	12.6	1.9	0.8	5.1	6.51844
508500	11.2	1.2	1.1	4.5	5.80259
509000	7.8	1	0.7	3.16667	4.01539
509500	13.1	0.9	0.5	4.83333	7.16194
510000	9.1	1.2	0.5	3.6	4.77598
510500	11.5	2.3	0.5	4.76667	5.90028
511000	14.3	7.9	1.7	7.96667	6.30026
511500	9.6	4.1	2.1	5.26667	3.88373
512000	9.1	2.6	0.7	4.13333	4.40492
512500	12.4	2.6	0.5	5.16667	6.35164
513000	15.9	1.6	0.5	6	8.59127
513500	7.4	1.7	0.5	3.2	3.68646
514000	13.3	5	0.9	6.4	6.31744
514500	10	3.8	3.3	5.7	3.73229
515000	10	2.2	1.1	4.43333	4.85215
515500	9.9	1.3	0.9	4.03333	5.08462
516000	9.6	1.7	0.9	4.06667	4.80867
516500	10.5	2.1	1	4.53333	5.19647
517000	9.8	1.5	1	4.1	4.94267
517500	10.9	1	1	4.3	5.71577
518000	11.2	1.6	1.6	4.8	5.54256
518500	10.9	2.2	1.5	4.86667	5.23673
519000	9.4	1	0.9	3.76667	4.87887
519500	7.9	1.3	1.2	3.46667	3.8397
520000	17.7	2.6	2.6	7.63333	8.71799
520500	12	2	2	5.33333	5.7735
521000	8	1.4	1.4	3.6	3.81051
521500	5.2	1.1	1.1	2.46667	2.36714
522000	12.5	0.6	0.6	4.56667	6.87047
522500	5.5	0.2	0.2	1.96667	3.05996
523000	7.4	0.2	0.2	2.6	4.15692
523500	10.6	0.2	0.2	3.66667	6.00444
524000	4.5	0.2	0.2	1.63333	2.48261
524500	6.5	0.2	0.2	2.3	3.63731
525000	7.9	0.2	0.2	2.76667	4.4456
525500	10.7	0.2	0.2	3.7	6.06218
526000	7.6	0.2	0.2	2.66667	4.27239
526500	36.1	2	2	13.3667	19.6876
527000	55.2	11.8	9.7	25.5667	25.6847
527500	8.9	4.1	2	5	3.53695
528000	10.1	2.5	2.4	5	4.41701
528500	126.6	56.8	52.9	78.7667	41.4708
529000	142.9	140.8	129.9	137.867	6.97878
529500	60.6	60.6	45	55.4	9.00666
530000	69.9	69.9	52.4	64.0667	10.1036
530500	62.5	62.5	56.5	60.5	3.4641
531000	83.3	83.3	69.9	78.8333	7.73649
531500	106.4	106.4	90.9	101.233	8.94893
532000	131.6	131.6	116.3	126.5	8.83346
532500	149.3	149.3	137	145.2	7.10141
533000	138.9	135.1	120.5	131.5	9.71391
533500	166.7	144.9	117.6	143.067	24.6013
534000	140.8	109.9	84	111.567	28.4367
534500	122	88.5	66.7	92.4	27.8555
535000	125	104.2	77.5	102.233	23.811
535500	107.5	95.2	69.9	90.8667	19.1709
536000	117.6	103.1	65.8	95.5	26.7232
536500	105.3	90.1	58.5	84.6333	23.8741
537000	87.7	70.4	48.3	68.8	19.7487
537500	78.1	56.2	36.1	56.8	21.0064
538000	61.7	41.3	31.7	44.9	15.3206
538500	41.7	20.3	15.2	25.7333	14.0607
539000	29.9	10	5	14.9667	13.1721
539500	28.2	6.2	3.4	12.6	13.5823
540000	24.8	3.2	1.4	9.8	13.0215
540500	23.1	5.2	1.8	10.0333	11.443
541000	28.8	5.6	4.5	12.9667	13.7231
541500	22.3	7.4	7.4	12.3667	8.60252
542000	25.4	9.4	9.4	14.7333	9.2376
542500	21.7	7.2	7.2	12.0333	8.37158
543000	21.2	8.3	8.3	12.6	7.44782
543500	17.5	4.5	4.5	8.83333	7.50555
544000	23.7	5.9	5.9	11.8333	10.2768
544500	20.9	8.8	8.8	12.8333	6.98594
545000	21.8	5.6	5.6	11	9.35307
545500	22.8	4.5	4.5	10.6	10.5655
546000	19.5	3.1	3.1	8.56667	9.46854
546500	23	4.2	4.2	10.4667	10.8542
547000	26.8	6.3	6.3	13.1333	11.8357
547500	24.3	6.4	2.6	11.1	11.5884
548000	36.4	14.1	5.6	18.7	15.9069
548500	24.8	8.9	7.2	13.6333	9.7079
549000	23.7	6.9	5.4	12	10.1602
549500	25.3	7.6	3.1	12	11.7358
550000	29.2	3	1.3	11.1667	15.6404
550500	24.9	5.7	2.9	11.1667	11.9755
551000	22.1	6.1	6.1	11.4333	9.2376
551500	22.2	7.5	7.5	12.4	8.48705
552000	20.4	3.4	3.4	9.06667	9.81495
552500	24.4	3.1	3.1	10.2	12.2976
553000	20.5	1.7	1.7	7.96667	10.8542
553500	19.2	3	3	8.4	9.35307
554000	24.4	5.2	5.2	11.6	11.0851
554500	26.4	6.8	5.7	12.9667	11.6466
555000	23.4	2.9	2.9	9.73333	11.8357
555500	29.7	9.8	8.6	16.0333	11.8509
556000	25.6	8.1	8.1	13.9333	10.1036
556500	22.6	4	4	10.2	10.7387
557000	31	6.2	5.1	14.1	14.6462
557500	22.4	5.4	5.4	11.0667	9.81495
558000	24.6	3	2.5	10.0333	12.6176
558500	23.6	4.2	3.1	10.3	11.5313
559000	24.8	6.5	6.5	12.6	10.5655
559500	23.5	7.8	7.8	13.0333	9.0644
560000	25.4	8.3	8.3	14	9.87269
560500	25.6	4.8	3.8	11.4	12.3077
561000	24	7.8	6.2	12.6667	9.8475
561500	32.6	6.2	3.9	14.2333	15.9475
562000	26	1.6	1.6	9.73333	14.0873
562500	22.3	3.2	3.2	9.56667	11.0274
563000	24.2	4	4	10.7333	11.6625
563500	26.7	4.8	3.6	11.7	13.0042
564000	22.5	2.9	2.7	9.36667	11.3742
564500	27.8	1.5	1.5	10.2667	15.1843
565000	23.9	1	1	8.63333	13.2213
565500	27.3	3.5	3.5	11.4333	13.7409
566000	28.8	3.8	3.8	12.1333	14.4338
566500	21.3	3.2	3.2	9.23333	10.45
567000	24.2	3.4	3.4	10.3333	12.0089
567500	24.5	2.7	2.7	9.96667	12.5862
568000	19.5	2.5	2.5	8.16667	9.81495
568500	26.8	3.1	3.1	11	13.6832
569000	22.7	2	1.6	8.76667	12.0683
569500	26.2	5.7	2.8	11.5667	12.7555
570000	29.3	9	7.5	15.2667	12.1763
570500	25.7	7.3	7.3	13.4333	10.6232
571000	24.6	5	5	11.5333	11.3161
571500	24.2	5.3	4	11.1667	11.3059
572000	28.2	3.7	3	11.6333	14.3514
572500	22.5	0.8	0.8	8.03333	12.5285
573000	25.2	0.8	0.8	8.93333	14.0873
573500	25.5	2.9	2.3	10.2333	13.2247
574000	25.8	6.6	6.6	13	11.0851
574500	27.2	5	5	12.4	12.8172
575000	25.2	7.1	5.7	12.6667	10.8767
575500	21.2	3	3	9.06667	10.5078
576000	26.5	4	4	11.5	12.9904
576500	31.9	7.6	4.6	14.7	14.971
577000	27.1	5.7	5.1	12.6333	12.5321
577500	25.7	8.5	8.5	14.2333	9.93042
578000	24.4	7.3	7.3	13	9.87269
578500	29.9	9.4	9.4	16.2333	11.8357
579000	28.7	8.8	8.8	15.4333	11.4893
579500	28.2	7.4	6.2	13.9333	12.3699
580000	25.6	4	3.8	11.1333	12.5289
580500	26.6	5.3	5.3	12.4	12.2976
581000	29.3	9.2	9.2	15.9	11.6047
581500	25.4	5.5	5.5	12.1333	11.4893
582000	25.3	5.5	4.4	11.7333	11.7619
582500	26.2	4.4	2.3	10.9667	13.2342
583000	29.4	9.2	3.9	14.1667	13.456
583500	30.9	9.4	7.3	15.8667	13.0615
584000	25.3	3.9	3.9	11.0333	12.3553
584500	24.4	7.7	7.7	13.2667	9.64175
585000	20.9	4.3	4.3	9.83333	9.58401
585500	26	5	5	12	12.1244
586000	24.1	2.7	2.7	9.83333	12.3553
586500	28.7	5.7	4.9	13.1	13.5159
587000	22.6	1.3	1.3	8.4	12.2976
587500	23.2	4.2	4.2	10.5333	10.9697
588000	25.9	6.9	6.9	13.2333	10.9697
588500	25.8	5.3	5.3	12.1333	11.8357
589000	26.7	5.4	5.4	12.5	12.2976
589500	22.7	5.1	5.1	10.9667	10.1614
590000	28.1	5.5	4.1	12.5667	13.4705
590500	24.8	5.2	5.2	11.7333	11.3161
591000	25.3	5.9	5.9	12.3667	11.2006
591500	25.4	8.9	7.4	13.9	9.98749
592000	23.6	10.9	10.9	15.1333	7.33235
592500	28.8	7.4	6.1	14.1	12.7472
593000	24.5	4.1	4.1	10.9	11.7779
593500	25.5	5.1	5.1	11.9	11.7779
594000	24.3	9.4	7.8	13.8333	9.09963
594500	25.4	3.7	3.4	10.8333	12.616
595000	22.8	1	1	8.26667	12.5862
595500	20.3	1.3	1.3	7.63333	10.9697
596000	18.6	2.9	2.9	8.13333	9.0644
596500	32.8	7.1	7.1	15.6667	14.8379
597000	25.9	5.1	5.1	12.0333	12.0089
597500	27	5.8	5.8	12.8667	12.2398
598000	26.2	2.6	2.1	10.3	13.7721
598500	21.2	1.2	0.9	7.76667	11.6346
599000	25.8	4	2.4	10.7333	13.0726
599500	23.3	3.1	3.1	9.83333	11.6625
600000	22.3	1.8	1.8	8.63333	11.8357
600500	24.3	2.6	2.6	9.83333	12.5285
601000	22.4	2.8	2.8	9.33333	11.3161
601500	27.2	4.7	3.1	11.6667	13.476
602000	25.4	3.3	3.3	10.6667	12.7594
602500	28.4	3.3	3.3	11.6667	14.4915
603000	25.1	6.4	5.2	12.2333	11.159
603500	22.9	8	8	12.9667	8.60252
604000	28.7	7.6	4	13.4333	13.3433
604500	26.3	5.9	4.4	12.2	12.234
605000	26.5	7.1	7.1	13.5667	11.2006
605500	26.5	11.3	9.2	15.6667	9.44052
606000	20.8	5.2	3.7	9.9	9.46942
606500	24.4	2.7	1.3	9.46667	12.9516
607000	20.8	6	3.7	10.1667	9.28027
607500	19.3	4.1	4.1	9.16667	8.77572
608000	24.6	6.1	6.1	12.2667	10.681
608500	24	3.9	2.6	10.1667	11.9976
609000	22	4.4	4.2	10.2	10.2196
609500	24	8	6.4	12.8	9.73242
610000	25.1	9.8	7.8	14.2333	9.46379
610500	23.5	4.5	3.3	10.4333	11.332
611000	26.5	3	3	10.8333	13.5677
611500	30.7	7.1	5.7	14.5	14.0471
612000	27.1	3.6	3.4	11.3667	13.6258
612500	23	1.3	1.3	8.53333	12.5285
613000	25.5	2.2	2.2	9.96667	13.4523
613500	23	2.2	2.2	9.13333	12.0089
614000	22.9	6	4.8	11.2333	10.1214
614500	27.7	6.6	5.3	13.2	12.5742
615000	26.4	5	5	12.1333	12.3553
615500	16.7	2.1	2.1	6.96667	8.42931
616000	20.7	2.4	2.4	8.5	10.5655
616500	27.1	3.8	3.8	11.5667	13.4523
617000	28.6	8.7	8.7	15.3333	11.4893
617500	28.5	12.7	11.1	17.4333	9.61735
618000	24.4	4.1	4.1	10.8667	11.7202
618500	21.6	3.5	2.3	9.13333	10.8131
619000	24.9	2.5	1.6	9.66667	13.2001
619500	24.7	1.4	1.4	9.16667	13.4523
620000	28.7	4.3	4.3	12.4333	14.0873
620500	26.9	8.6	6.9	14.1333	11.0889
621000	25.6	10.3	10.3	15.4	8.83346
621500	29.6	3.6	2.9	12.0333	15.2172
622000	21.1	1.1	1.1	7.76667	11.547
622500	22.8	2.9	2.9	9.53333	11.4893
623000	27.5	12.8	12.8	17.7	8.48705
623500	20.1	3	3	8.7	9.87269
624000	26	4.4	4.4	11.6	12.4708
624500	22.2	5.3	5.3	10.9333	9.75722
625000	27.1	8.5	8.5	14.7	10.7387
625500	21.9	6.4	6.4	11.5667	8.94893
626000	17.5	2.7	2.7	7.63333	8.54478
626500	24.4	3.3	3.3	10.3333	12.1821
627000	24.2	3.6	3.6	10.4667	11.8934
627500	22.3	6.3	6.3	11.6333	9.2376
628000	21.8	2.4	1.5	8.56667	11.4692
628500	25	2.2	1.1	9.43333	13.4923
629000	23.4	4.4	3	10.2667	11.3953
629500	26	6.5	4.9	12.4667	11.7475
630000	24.3	3.5	2.3	10.0333	12.3699
630500	18.4	3.4	2.1	7.96667	9.05888
631000	24.1	4.7	4.7	11.1667	11.2006
631500	24.9	5.8	5.8	12.1667	11.0274
632000	27.2	5.8	5.8	12.9333	12.3553
632500	27.5	6	5.3	12.9333	12.62
633000	20.7	5.5	3.3	9.83333	9.47488
633500	24.5	2.3	2.2	9.66667	12.8461
634000	26.3	3	1.5	10.2667	13.9055
634500	30.7	9.6	5.2	15.1667	13.631
635000	20.3	5.3	5.3	10.3	8.66025
635500	28.3	7.8	6.5	14.2	12.2282
636000	22.4	6	3	10.4667	10.4429
636500	22.1	5.6	2.8	10.1667	10.429
637000	25.8	8.8	7.2	13.9333	10.3079
637500	22.1	5.9	4.7	10.9	9.71802
638000	25.2	5.5	4.1	11.6	11.7987
638500	28.7	6.9	6.9	14.1667	12.5862
639000	22.5	8.8	8.5	13.2667	7.99771
639500	21.4	6.3	5	10.9	9.11647
640000	24.3	2.9	2.9	10.0333	12.3553
640500	36.4	8.5	7.3	17.4	16.4654
641000	28.2	14.5	14.5	19.0667	7.9097
641500	22.7	2.4	2.4	9.16667	11.7202
642000	16.6	1.8	1.7	6.7	8.5738
642500	21.8	5.5	3.6	10.3	10.0045
643000	22.3	6	4.5	10.9333	9.87235
643500	21.1	4.8	3	9.63333	9.97112
644000	25.6	1.9	0.9	9.46667	13.9808
644500	23.9	4.3	2.4	10.2	11.9025
645000	30.5	4.7	3.5	12.9	15.2539
645500	24.3	2.8	2.8	9.96667	12.413
646000	24	2	2	9.33333	12.7017
646500	23.3	5.6	5.6	11.5	10.2191
647000	16.2	1.8	1.8	6.6	8.31384
647500	22.6	1.4	1.4	8.46667	12.2398
648000	23.9	4	4	10.6333	11.4893
648500	19.2	2	2	7.73333	9.93042
649000	24.8	6.4	5.5	12.2333	10.8924
649500	24.8	5.6	3.3	11.2333	11.8052
650000	22.5	3.8	1.3	9.2	11.5858
650500	21.3	3.6	1.9	8.93333	10.7435
651000	20.8	2.4	2.2	8.46667	10.6814
651500	20.3	4.8	4.8	9.96667	8.94893
652000	27	4.3	2.6	11.3	13.6231
652500	27.6	5	1.3	11.3	14.2369
653000	26.5	4.6	1.6	10.9	13.593
653500	24.3	2.3	1.2	9.26667	13.0309
654000	22.5	5	2.8	10.1	10.7949
654500	23.6	5.2	5.2	11.3333	10.6232
655000	22.2	7	7	12.0667	8.77572
655500	24.7	7.6	7.6	13.3	9.87269
656000	23.8	6.7	6.3	12.2667	9.99016
656500	32.5	5.5	3.3	13.7667	16.2608
657000	23.5	2.5	2.2	9.4	12.2119
657500	22	1	1	8	12.1244
658000	21.2	2.9	2.9	9	10.5655
658500	21.8	3.1	3.1	9.33333	10.7965
659000	25.2	4.6	4.6	11.4667	11.8934
659500	22.2	4.7	4.7	10.5333	10.1036
660000	18.8	5.6	3.8	9.4	8.19024
660500	19.3	3.4	2.7	8.46667	9.38847
661000	21.2	1.3	1.3	7.93333	11.4893
661500	25.2	4.9	4.9	11.6667	11.7202
662000	26	13	13	17.3333	7.50555
662500	20.9	8.7	8.7	12.7667	7.04367
663000	17.4	6.7	6.7	10.2667	6.17765
663500	18.1	6.3	6.3	10.2333	6.81273
664000	18.1	4.5	4.5	9.03333	7.85196
664500	19.6	2.6	2.6	8.26667	9.81495
665000	30.7	7.5	7.5	15.2333	13.3945
665500	27.4	11.2	9.3	15.9667	9.94703
666000	17.5	6.7	6.4	10.2	6.32376
666500	22.6	3	3	9.53333	11.3161
667000	24.2	2.6	2.6	9.8	12.4708
667500	23.1	2.2	2.2	9.16667	12.0666
668000	22.5	3.1	3.1	9.56667	11.2006
668500	21.1	4.5	4.5	10.0333	9.58401
669000	20.7	3.6	3.6	9.3	9.87269
669500	23.6	5.9	2.9	10.8	11.1862
670000	23.6	2.6	1.3	9.16667	12.5165
670500	25.4	3.8	1.9	10.3667	13.0539
671000	23.6	3	3	9.86667	11.8934
671500	23.2	6.2	1.7	10.3667	11.3395
672000	17.1	2.5	0.5	6.7	9.06201
672500	26.8	1.7	0.5	9.66667	14.85
673000	22	1.1	0.5	7.86667	12.2435
673500	23.9	1.7	0.9	8.83333	13.0542
674000	22.8	5.6	4.6	11	10.2313
674500	24.7	2.9	2.9	10.1667	12.5862
675000	21.8	1.7	1.7	8.4	11.6047
675500	21.3	1.2	1.2	7.9	11.6047
676000	26.4	3	1.9	10.4333	13.8385
676500	20.5	2.9	2.1	8.5	10.4
677000	19.6	1.6	1.6	7.6	10.3923
677500	19.5	3.1	3.1	8.56667	9.46854
678000	20.3	2.6	2.6	8.5	10.2191
678500	20.5	2	2	8.16667	10.681
679000	20.2	3.2	3.2	8.86667	9.81495
679500	19.8	7	5.2	10.6667	7.96074
680000	26.5	5.3	3.5	11.7667	12.7911
680500	19.2	3.5	2.6	8.43333	9.33506
681000	17.7	2.1	1	6.93333	9.34041
681500	25.1	5.8	3.1	11.3333	11.9985
682000	22.9	4.7	4.7	10.7667	10.5078
682500	22.1	4.5	4.5	10.3667	10.1614
683000	20.9	10.8	7.3	13	7.06187
683500	21.2	7.1	5.3	11.2	8.70689
684000	21.7	5	3.7	10.1333	10.0381
684500	22.7	3.4	1.8	9.3	11.6323
685000	27.2	2.2	1.1	10.1667	14.7615
685500	20.9	4.8	2.7	9.46667	9.95707
686000	19.6	3	3	8.53333	9.58401
686500	24.6	5.5	4.6	11.5667	11.2962
687000	17.3	1.3	1.3	6.63333	9.2376
687500	17.9	0.9	0.9	6.56667	9.81495
688000	20.7	1.5	1.5	7.9	11.0851
688500	24.4	3.8	3.8	10.6667	11.8934
689000	26.7	4.5	2.2	11.1333	13.5301
689500	21.8	5.9	4.7	10.8	9.54516
690000	19.6	3.6	3.6	8.93333	9.2376
690500	20.8	2.4	2.3	8.5	10.6522
691000	21.1	1.3	1.2	7.86667	11.4605
691500	24.8	4.1	2.5	10.4667	12.4388
692000	17.7	7.3	6.3	10.4333	6.31295
692500	12.9	4.2	4.2	7.1	5.02295
693000	24.1	3.7	3.7	10.5	11.7779
693500	22.6	5.9	5.9	11.4667	9.64175
694000	20.5	1.2	1.2	7.63333	11.1429
694500	16.6	0.7	0.7	6	9.17987
695000	18.7	0.7	0.7	6.7	10.3923
695500	27.1	1.8	1.4	10.1	14.7238
696000	18.1	6.9	3	9.33333	7.83858
696500	20.8	2.9	1.1	8.26667	10.8914
697000	20.7	3.5	1.5	8.56667	10.5553
697500	19.8	4.2	4.2	9.4	9.00666
698000	16.8	2.7	1.2	6.9	8.60639
698500	26.8	1.3	0.7	9.6	14.8987
699000	17.8	1.1	0.7	6.53333	9.75927
699500	18.3	1.9	1.5	7.23333	9.5861
700000	21.6	1	1	7.86667	11.8934
700500	21.2	2.9	2.3	8.8	10.7429
701000	21.1	2.8	2.5	8.8	10.6532
701500	19.1	3.9	3.9	8.96667	8.77572
702000	24.4	3.2	3.2	10.2667	12.2398
702500	24.7	3.1	1.9	9.9	12.8312
703000	20.4	2.7	1.6	8.23333	10.551
703500	24.9	3	2	9.96667	12.9423
704000	13.1	2.3	2.3	5.9	6.23538
704500	16.9	2.6	2.6	7.36667	8.25611
705000	15.8	3.4	3.1	7.43333	7.2473
705500	24.1	2.4	1.6	9.36667	12.7657
706000	15.1	1	1	5.7	8.14064
706500	18.5	2	2	7.5	9.52628
707000	21.1	1.7	1.7	8.16667	11.2006
707500	18.2	1.4	1.4	7	9.69948
708000	14.3	1.5	1.5	5.76667	7.39008
708500	16.5	2.5	2.5	7.16667	8.0829
709000	19.3	2.3	2.3	7.96667	9.81495
709500	20	2.2	2	8.06667	10.3351
710000	20	5.3	3.9	9.73333	8.91871
710500	15.4	1.7	1.7	6.26667	7.9097
711000	20.5	1.8	1.8	8.03333	10.7965
711500	21.6	7.8	7.8	12.4	7.96743
712000	18.9	4	3	8.63333	8.90524
712500	15.7	2.3	2.2	6.73333	7.76552
713000	17.2	3.8	3.8	8.26667	7.73649
713500	28.4	3.9	3.1	11.8	14.3816
714000	17.8	3.6	3.6	8.33333	8.19837
714500	19.2	1.6	1.5	7.43333	10.1904
715000	21.1	0.9	0.8	7.6	11.6914
715500	22.5	1.5	1	8.33333	12.2712
716000	24.8	2.8	2.8	10.1333	12.7017
716500	20.4	5.3	4.7	10.1333	8.89625
717000	28.7	5.7	3.8	12.7333	13.8601
[truncated: 571 more rows]

## Sheet: Phenethyl propionate-pb3B
	GC-SSR responses to furaneol phenethyl propionate
[truncated: 1,707 more rows]

[truncated: 1 more sheets: Fig 6B]
